# Supplementary material for: Unified and green oxidation of amides and aldehydes for the Hofmann and Curtius rearrangements
Source: Royal Society of Chemistry journal article supplement (doi:10.1039/d3gc04355j), 2023-11-27
Supplement: d3gc04355j1.pdf [file d3gc04355j1.pdf]

## Supporting Information

# Unified and Green Oxidation of Amides and Aldehydes for Hofmann and Curtius Rearrangements

Liyan Song<sup>\*a</sup>, Yufei Meng<sup>a</sup>, Tongchao Zhao<sup>a</sup>, Lifang Liu<sup>a</sup>, Xiaohong Pan<sup>a</sup>, Binbin Huang<sup>a</sup>, Hongliang Yao<sup>b</sup>, Ran Lin<sup>\*a</sup> and Rongbiao Tong<sup>\*b,c</sup>

<sup>a</sup>Key Laboratory of Biopesticide and Chemical Biology, Ministry of Education, College of Plant Protection, Fujian Agriculture and Forestry University, Fuzhou, Fujian, China

<sup>b</sup>Guangdong Key Laboratory of Animal Conservation and Resource Utilization, Guangdong Public Laboratory of Wild Animal Conservation and Utilization, Institute of Zoology, Guangdong Academy of Sciences, Guangzhou, Guangdong, China

<sup>c</sup>Department of Chemistry, The Hong Kong University of Science and Technology, Clearwater Bay, Kowloon, Hong Kong, China.

Email (L. Song): [songliyan@fafu.edu.cn](mailto:songliyan@fafu.edu.cn) Email (R. Lin): [linran@fafu.edu.cn](mailto:linran@fafu.edu.cn)

Email (R. Tong): [rtong@ust.hk](mailto:rtong@ust.hk)

## Table of Contents

|                                                                     |      |
|---------------------------------------------------------------------|------|
| General Information                                                 | S-2  |
| The References for Known Compounds                                  | S-3  |
| Preparation of Primary Amide Substrates                             | S-6  |
| Preparation of <i>N</i> -Chlorobenzamide ( <b>2a</b> )              | S-6  |
| Oxone-KCl Halogenation of Primary Amides for Hofmann Rearrangement  | S-6  |
| The Screening of Solvents                                           | S-11 |
| Oxone-KBr Mediated Azidation of Aldehydes for Curtius Rearrangement | S-12 |
| Oxone-KBr Mediated Azidation of Aldehydes to Afford Acyl Azides     | S-17 |
| Hofmann Rearrangement with Alcohol/Amine/Amide                      | S-22 |
| Curtius Rearrangement with Amines to Generate (Chiral) Ureas/Amides | S-23 |
| Gram Scale Synthesis of Chiral Ligands <b>7i</b> and <b>7j</b>      | S-29 |
| Control Experiments                                                 | S-29 |

|                                                |      |
|------------------------------------------------|------|
| References                                     | S-31 |
| <sup>1</sup> H and <sup>13</sup> C NMR Spectra | S-32 |

**General Information:** Reactions were carried out in oven or flame-dried glassware under a nitrogen atmosphere, unless otherwise noted. Tetrahydrofuran (THF) was freshly distilled before use from sodium using benzophenone as indicator. Dichloromethane was freshly distilled before use from calcium hydride (CaH<sub>2</sub>). All other anhydrous solvents were dried over 3Å or 4Å molecular sieves. Solvents used in workup, extraction and column chromatography were used as received from commercial suppliers without prior purification. Reactions were magnetically stirred and monitored by thin layer chromatography (TLC, 0.25 mm) on Liangchen pre-coated silica gel plates. Flash chromatography was performed with silica gel 60 (particle size 0.040 – 0.062 mm) supplied by Liangchen. Infrared spectra were collected on a Bruker model TENSOR27 spectrophotometer. <sup>1</sup>H and <sup>13</sup>C NMR spectra were recorded on a Bruker AVIII-400 spectrometer (400 MHz for <sup>1</sup>H, 100 MHz for <sup>13</sup>C, 376 MHz for <sup>19</sup>F). Chemical shifts are reported in parts per million (ppm) as values relative to the internal chloroform (7.26 ppm for <sup>1</sup>H and 77.16 ppm for <sup>13</sup>C) or DMSO (2.50 ppm for <sup>1</sup>H and 39.52 ppm for <sup>13</sup>C). Abbreviations for signal coupling are as follows: s, singlet; d, doublet; t, triplet; q, quartet; m, multiplet; br, broad peak. Optical rotations were measured on a JASCO Perkin-Elmer model P-2000 polarimeter. High resolution mass spectra were measured at Keecloud Mass Spectrometry Service Company on either an Thermo Scientific LTQ Orbitrap XL system or a Bruker solariX System. Melting point was recorded on a Laboratory Devices model MEL-TEMP II melting point apparatus. The aldehyde substrates and (chiral) amines were purchased from Aldrich or J&K Scientific.

## The References for Known Compounds

| Compound                                                                           | References                                                                                                                                                                                                                                                 |
|------------------------------------------------------------------------------------|------------------------------------------------------------------------------------------------------------------------------------------------------------------------------------------------------------------------------------------------------------|
| Urethylane<br>anthranilate                                                         | Moriyama, K.; Ishida, K.; Togo, H. <i>Org. Lett.</i> <b>2012</b> , <i>14</i> , 946-949.                                                                                                                                                                    |
| 1ad                                                                                | Flynn, D. L.; Caldwell, T. M.; Kaufman, M. D.; Patt, W. C.; Samarakoon, T.; Vogeti, L.; Yates, K. M. <i>N-Acyl-N'-(Pyridin-2-yl) Ureas and Analogs Exhibiting Anti-cancer and Anti-proliferative Activities</i> . U.S. Patent 2014/0275080, Sep. 18. 2014. |
| 2a                                                                                 | Yu, X.; Chen, K.; Guo, S.; Shi, P.; Song, C.; Zhu, J. <i>Org. Lett.</i> <b>2017</b> , <i>19</i> , 5348-5351.                                                                                                                                               |
| 1ac, 3a, 3c, 3e, 3f,<br>3g, 3h, 3j, 3m, 3o,<br>3q, 3ac, 3ae, 3af,<br>3ag, 3ao, 3ax | Li, J.; Xue, M.; Yan, X.; Liu, W.; Xu, K.; Zhang, S. <i>Org. Biomol. Chem.</i> <b>2018</b> , <i>16</i> , 4615.                                                                                                                                             |
| 3b, 3x, 3aa, 3ab                                                                   | Yoshimura, A.; Middleton, K. R.; Luedtke, M. W.; Zhu, C.; Zhdankin, V. V. <i>J. Org. Chem.</i> <b>2012</b> , <i>77</i> , 11399.                                                                                                                            |
| 3d                                                                                 | Xu, D.; Guan, J.; Xu, X.; Gong, S.; Xu, H. <i>J. Heterocyclic Chem.</i> <b>2016</b> , <i>53</i> , 1469.                                                                                                                                                    |
| 3r                                                                                 | Borah, A. J.; Phukan, P. <i>Tetrahedron Lett.</i> <b>2012</b> , <i>53</i> , 3035.                                                                                                                                                                          |
| 3i, 3l, 3n, 3ad, 3ak                                                               | Uhlig, N.; Li, C.-J. <i>Chem. Eur. J.</i> <b>2014</b> , <i>20</i> , 12066.                                                                                                                                                                                 |
| 3p                                                                                 | Das, M.; Rodriguez, A.; Lo, P. K. T.; Moran, W. J. <i>Adv. Syn. Catal.</i> <b>2021</b> , <i>363</i> , 1646.                                                                                                                                                |
| 3s                                                                                 | Wehman, P.; Borst, L.; Kamer, P. C. J.; van Leeuwen, P. W. N. M. <i>Chem. Ber.</i> <b>1997</b> , <i>130</i> , 13.                                                                                                                                          |
| 3t                                                                                 | Massacret, M.; Lhoste, P.; Sinou, D. <i>Eur. J. Org. Chem.</i> <b>1999</b> , <i>1999</i> , 129.                                                                                                                                                            |
| 3z                                                                                 | Jew, S.-s.; Park, H. G.; Park, H.-J.; Park, M.-s.; Cho, Y.-s. <i>Tetrahedron Lett.</i> <b>1990</b> , <i>31</i> , 1559.                                                                                                                                     |

|                                                                              |                                                                                                                                                      |
|------------------------------------------------------------------------------|------------------------------------------------------------------------------------------------------------------------------------------------------|
| <b>3ah</b>                                                                   | Germain, N.; Hermsen, M.; Schaub, T.; Trapp, O. <i>Appl. Organometal. Chem.</i> <b>2017</b> , <i>31</i> , e3733.                                     |
| <b>3ai</b>                                                                   | Yang, Q.; Robertson, A.; Alper, H. <i>Org. Lett.</i> <b>2008</b> , <i>10</i> , 5079.                                                                 |
| <b>3aj</b>                                                                   | Zhang, L.; Xiao, P.; Guan, X.; Huang, Z.; Zhang, J.; Bi, X. <i>Org. Biomol. Chem.</i> <b>2017</b> , <i>15</i> , 1580.                                |
| <b>3an</b>                                                                   | Guan, Z.-H.; Lei, H.; Chen, M.; Ren, Z.-H.; Bai, Y.; Wang, Y.-Y. <i>Adv. Synth. Catal.</i> <b>2012</b> , <i>354</i> , 489.                           |
| <b>3ar</b>                                                                   | Wu, Y.; Ding, X.; Yang, Y.; Li, Y.; Qi, Y.; Hu, F.; Qin, M.; Liu, Y.; Sun, L.; Zhao, Y. <i>Eur. J. Med. Chem.</i> <b>2020</b> , <i>185</i> , 111781. |
| <b>3au</b>                                                                   | Wang, B.; He, J.; Sun, R. C. <i>Chin. Chem. Lett.</i> <b>2010</b> , <i>21</i> , 794.                                                                 |
| <b>3av</b>                                                                   | Gogoi, P.; Konwar, D. <i>Tetrahedron Lett.</i> <b>2007</b> , <i>48</i> , 531.                                                                        |
| <b>3aw</b>                                                                   | Kim, J.-G.; Jang, D. O. <i>Tetrahedron Lett.</i> <b>2009</b> , <i>50</i> , 2688.                                                                     |
| <b>5a, 5b, 5c, 5d, 5e, 5g, 5h, 5i, 5j, 5k, 5l, 5m, 5o, 5u, 5ac, 5ad, 5ae</b> | Joseph, D.; Lee, S. <i>Org. Lett.</i> <b>2022</b> , <i>24</i> , 6186.                                                                                |
| <b>5f, 5p, 5n</b>                                                            | Yu, T.-Y.; Zheng, Z.-J.; Dang, T.-T.; Zhang, F.-X.; Wei, H. <i>J. Org. Chem.</i> <b>2018</b> , <i>83</i> , 10589.                                    |
| <b>5q</b>                                                                    | Bellotti, P.; Brocus, J.; Orf, F. E.; Selkti, M.; Konig, B.; Belmont, P.; Brachet, E. <i>J. Org. Chem.</i> <b>2019</b> , <i>84</i> , 6278.           |
| <b>5t</b>                                                                    | Arote, N. D.; Akamanchi, K. G. <i>Tetrahedron Lett.</i> <b>2007</b> , <i>48</i> , 5661.                                                              |
| <b>5v</b>                                                                    | Bagal, D. B.; Park, S.-W.; Song, H.-J.; Chang, S. <i>Chem. Commun.</i> <b>2017</b> , <i>53</i> , 8798.                                               |
| <b>5w</b>                                                                    | Akae, Y.; Sogawa, H.; Takata, T. <i>Eur. J. Org. Chem.</i> <b>2019</b> , <i>2019</i> , 3605.                                                         |
| <b>5z</b>                                                                    | Kang, T.; Kim, Y.; Lee, D.; Wang, Z.; Chang, S. <i>J. Am. Chem. Soc.</i> <b>2014</b> , <i>136</i> , 4141.                                            |
| <b>5ab</b>                                                                   | Kumar, R.; Arigela, R. K.; Kundu, B. <i>Chem. Eur. J.</i> <b>2015</b> , <i>21</i> , 11807.                                                           |
| <b>6a, 7a</b>                                                                | Tiwari, L.; Kumar, V.; Kumar, B.; Mahajan, D. <i>RSC Adv.</i> <b>2018</b> , <i>8</i> , 21585.                                                        |
| <b>6b</b>                                                                    | Zhang, C.; Liu, J.; Cheng, Z.; Li, J.; Song, S.; Jiao, N. <i>Synlett</i> <b>2023</b> , <i>34</i> , 1534.                                             |

|               |                                                                                                                                                       |
|---------------|-------------------------------------------------------------------------------------------------------------------------------------------------------|
| <b>6c, 7b</b> | Zhu, X.; Xu, M.; Sun, J.; Guo, D.; Zhang, Y.; Zhou, S.; Wang, S. <i>Eur. J. Org. Chem.</i> <b>2021</b> , 2021, 5213.                                  |
| <b>6d</b>     | Li, Z.; Xu, S.; Huang, B.; Yuan, C.; Chang, W.; Fu, B.; Jiao, L.; Wang, P.; Zhang, Z. <i>J. Org. Chem.</i> <b>2019</b> , 84, 9497.                    |
| <b>6e</b>     | Mackewitz, T.; Volland, M.; Paciello, R.; Schafer, A.; Breit, B.; Seiche, W. Hydrofomylation. U.S. Patent 7,049,473, May 23, 2006.                    |
| <b>7c</b>     | Hu, Q.; Wang, L.; Wang, C.; Wu, Y.; Ding, Z.; Yuan, R. <i>RSC Adv.</i> <b>2017</b> , 7, 37200.                                                        |
| <b>7d</b>     | Marivel, S.; Arunachalam, M.; Ghosh, P. <i>Cryst. Growth Des.</i> 2011, 11, 1642.                                                                     |
| <b>7e</b>     | Breitler, S.; Oldenhuis, N. J.; Fors, B. P.; Buchwald, S. L. <i>Org. Lett.</i> <b>2011</b> , 13, 3262.                                                |
| <b>7f</b>     | Wang, L.-M.; Du, B.-Q.; Zuo, D.-Z.; Cheng, M.-K.; Zhao, M.; Zhao, S.-J.; Zhai, X.; Gong, P. <i>Res. Chem. Intermed.</i> <b>2016</b> , 42, 3209.       |
| <b>7g</b>     | Okino, T.; Hoashi, Y.; Furukawa, T.; Xu, X.; Takemoto, Y. <i>J. Am. Chem. Soc.</i> <b>2005</b> , 127, 119.                                            |
| <b>7i</b>     | Azuma, T.; Murata, A.; Kobayashi, Y.; Inokuma, T.; Takemoto, Y. <i>Org. Lett.</i> <b>2014</b> , 16, 4256.                                             |
| <b>7k</b>     | McCooley, S. H.; Connon, S. J. <i>Angew. Chem. Int. Ed.</i> <b>2005</b> , 44, 6367.                                                                   |
| <b>7l</b>     | Mallojjala, S. C.; Sarkar, R.; Karugu, R. W.; Manna, M. S.; Ray, S.; Mukherjee, S.; Hirschi, J. S. <i>J. Am. Chem. Soc.</i> <b>2022</b> , 144, 17399. |
| <b>7m</b>     | Kohler, M. C.; Yost, J. M.; Garnsey, M. R.; Coltart, D. M. <i>Org. Lett.</i> <b>2010</b> , 12, 3376.                                                  |
| <b>8</b>      | Alzpurua, J. M.; Palomo, C. <i>Synthesis</i> <b>1982</b> , 1982, 684.                                                                                 |
| <b>10</b>     | Liu, J.; Yi, H.; Zhang, X.; Liu, C.; Liu, R.; Zhang, G.; Lei, A. <i>Chem. Commun.</i> <b>2014</b> , 50, 7636-7638.                                    |

### Preparation of Primary Amide Substrates

The amide substrates are known compounds. Most of them are purchased from Aldrich or J&K Scientific directly. **1ac-1ad** were prepared following the related procedures. Analytical data ( $^1\text{H}$  NMR and  $^{13}\text{C}$  NMR) matches with the literature.

### Preparation of *N*-Chlorobenzamide (**2a**)

To a stirred solution of benzamide (36 mg, 0.3 mmol) in the MeCN/H<sub>2</sub>O (10/1, 1.1 mL) at 0 °C were added KCl (34 mg, 0.45 mmol) and Oxone (138 mg, 0.45 mmol). After completion of the addition, the resulting mixture was stirred for 10 min before warmed to room temperature and stirred for an additional 4 h. When the aromatic amide substrate was fully consumed as determined by TLC analysis, the mixture was quenched by addition of water (5 mL). The aqueous mixture was extracted with EA (3 X 10 mL). The combined organic fractions were washed with brine, dried over Na<sub>2</sub>SO<sub>4</sub>, and concentrated under reduced pressure. The residue was purified by flash column chromatography on silica gel using eluents (petroleum ether/ethyl acetate = 10/1) to provide the desired compound **2a** (38 mg, 81% yield) as an off-white solid.

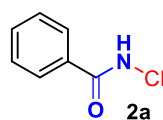

$^1\text{H}$  NMR (400 MHz, CDCl<sub>3</sub>)  $\delta$ : 8.19 (s, br), 7.80-7.77 (m, 2H), 7.54-7.50 (m, 1H), 7.42-7.39 (m, 2H).  $^{13}\text{C}$  NMR (100 MHz, CDCl<sub>3</sub>)  $\delta$ : 167.5, 132.6, 131.9, 128.9 (2x), 127.8 (2x).

### Oxone-KCl Halogenation of Primary Amides for Hofmann Rearrangement

**General Procedure A:** To a stirred solution of aromatic amide substrate (0.3 mmol) in the MeCN/H<sub>2</sub>O (10/1, 1.1 mL) at 0 °C were added KCl (34 mg, 0.45 mmol) and Oxone (138 mg, 0.45 mmol). After completion of the addition, the resulting mixture was stirred for 10 min before warmed to room temperature and stirred for an additional 2 h. When the aromatic amide substrate was fully consumed as determined by TLC analysis, methanol (0.6 mL) and NaOH (18 mg, 0.45 mmol) was added sequentially. The mixture was allowed to be stirred for 5 hrs and quenched by addition of sat. aq. Na<sub>2</sub>SO<sub>3</sub> (5 mL). The volatiles (mainly methanol and MeCN) was removed under reduced pressure and the aqueous mixture was extracted with EA (3 X 10 mL). The combined organic fractions were washed with brine, dried over Na<sub>2</sub>SO<sub>4</sub>, and concentrated under reduced pressure. The residue was purified by flash column chromatography on silica gel using eluents (petroleum ether/ethyl acetate = 10/1) to provide the desired compound **3**.

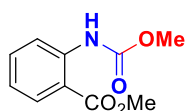

Urethylane anthranilate

**Urethylane anthranilate.** 24 mg, 38% yield; white solid.  $^1\text{H}$  NMR (400 MHz, CDCl<sub>3</sub>)  $\delta$ : 10.5 (br, 1H), 8.42 (dd,  $J$  = 8.4, 0.4 Hz, 1H), 8.00 (dd,  $J$  = 8.4, 1.6 Hz, 1H), 7.55-7.51 (m, 1H), 7.04-7.00 (m, 1H), 3.91 (s, 3H), 3.78 (s, 3H).  $^{13}\text{C}$  NMR (100 MHz, CDCl<sub>3</sub>)  $\delta$ : 168.6, 154.2, 141.9, 134.7, 131.0, 121.7, 118.9, 114.6, 52.4.

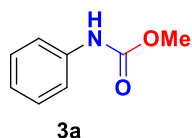

**3a.** 40 mg, 89% yield; white solid.  $^1\text{H NMR}$  (400 MHz,  $\text{CDCl}_3$ )  $\delta$ : 7.40-7.37 (m, 2H), 7.33-7.28 (m, 2H), 7.09-7.04 (m, 1H), 6.70 (br, s), 3.78 (s, 3H).  $^{13}\text{C NMR}$  (100 MHz,  $\text{CDCl}_3$ )  $\delta$ : 154.2, 137.9, 129.2 (2 $\times$ C), 123.6 (2 $\times$ C), 118.8, 52.5.

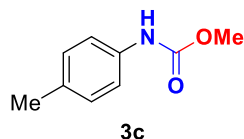

**3c.** 41 mg, 83% yield; white solid.  $^1\text{H NMR}$  (400 MHz,  $\text{CDCl}_3$ )  $\delta$ : 7.26 (d,  $J = 8.4$  Hz, 2H), 7.11 (d,  $J = 8.4$  Hz, 2H), 6.62 (br, 1H), 3.76 (s, 3H), 2.30 (s, 3H).  $^{13}\text{C NMR}$  (100 MHz,  $\text{CDCl}_3$ )  $\delta$ : 154.3, 135.3, 133.2, 129.7 (2 $\times$ C), 118.9 (2 $\times$ C), 52.4, 20.9.

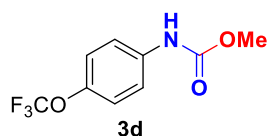

**3d.** 59 mg, 84% yield; white solid.  $^1\text{H NMR}$  (400 MHz,  $\text{CDCl}_3$ )  $\delta$ : 7.40 (d,  $J = 8.8$  Hz, 2H), 7.15 (d,  $J = 8.8$  Hz, 2H), 6.89 (br, 1H), 3.77 (s, 3H).  $^{13}\text{C NMR}$  (100 MHz,  $\text{CDCl}_3$ )  $\delta$ : 154.2, 144.9, 136.7, 122.0 (2 $\times$ C), 120.6 (q,  $J = 255$  Hz), 119.9 (2 $\times$ C), 52.6.

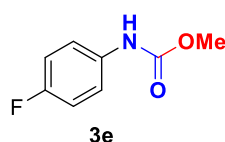

**3e.** 44 mg, 87% yield; white solid.  $^1\text{H NMR}$  (400 MHz,  $\text{CDCl}_3$ )  $\delta$ : 7.36-7.30 (m, 2H), 7.02-6.96 (m, 2H), 6.78 (br, 1H), 3.76 (s, 3H).  $^{13}\text{C NMR}$  (100 MHz,  $\text{CDCl}_3$ )  $\delta$ : 159.1 (d,  $J = 241$  Hz), 154.4, 133.9, 120.6 (2 $\times$ C), 115.8 (d,  $J = 23$  Hz, 2 $\times$ C), 52.5.

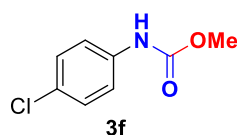

**3f.** 46 mg, 83% yield; white solid.  $^1\text{H NMR}$  (400 MHz,  $\text{CDCl}_3$ )  $\delta$ : 7.36-7.33 (m, 2H), 7.28-7.25 (m, 2H), 6.77 (br, 1H), 3.78 (s, 3H).  $^{13}\text{C NMR}$  (100 MHz,  $\text{CDCl}_3$ )  $\delta$ : 154.1, 136.6, 129.1 (2 $\times$ C), 128.5, 120.0 (2 $\times$ C), 52.6.

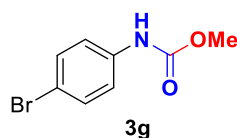

**3g.** 58 mg, 84% yield; white solid.  $^1\text{H NMR}$  (400 MHz,  $\text{CDCl}_3$ )  $\delta$ : 7.40 (d,  $J = 8.8$  Hz, 2H), 7.28 (d,  $J = 8.8$  Hz, 2H), 6.79 (br, 1H), 3.76 (s, 3H).  $^{13}\text{C NMR}$  (100 MHz,  $\text{CDCl}_3$ )  $\delta$ : 154.0, 137.1, 132.1 (2 $\times$ C), 120.3 (2 $\times$ C), 116.0, 52.6.

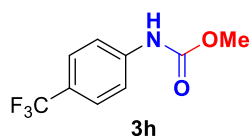

**3h.** 49 mg, 75% yield; white solid.  $^1\text{H NMR}$  (400 MHz,  $\text{CDCl}_3$ )  $\delta$ : 7.55 (d,  $J = 8.8$  Hz, 2H), 7.50 (d,  $J = 8.8$  Hz, 2H), 6.93 (br, 1H), 3.79 (s, 3H).  $^{13}\text{C NMR}$  (100 MHz,  $\text{CDCl}_3$ )  $\delta$ : 153.8, 141.1, 126.5 (q,  $J = 3.4$  Hz, 2 $\times$ C), 125.3 (q,  $J = 33$  Hz), 124.3 (q,  $J = 270$  Hz), 118.2 (2 $\times$ C), 52.8.

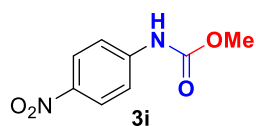

**3i.** 34 mg, 58% yield; yellowish solid.  $^1\text{H NMR}$  (400 MHz,  $\text{CDCl}_3$ )  $\delta$ : 8.20 (d,  $J = 9.2$  Hz, 2H), 7.56 (d,  $J = 9.2$  Hz, 2H), 7.04 (br, 1H), 3.82 (s, 3H).  $^{13}\text{C NMR}$  (100 MHz,  $\text{CDCl}_3$ )  $\delta$ : 153.4, 144.0, 143.1, 125.4 (2 $\times$ C), 117.8 (2 $\times$ C), 53.1.

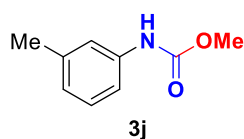

**3j.** 40 mg, 81% yield; white solid.  $^1\text{H NMR}$  (400 MHz,  $\text{CDCl}_3$ )  $\delta$ : 7.23 (s, 1H), 7.21-7.17 (m, 2H), 6.89-6.87 (m, 1H), 6.70 (br, 1H), 3.77 (s, 3H), 2.33 (s, 3H).  $^{13}\text{C NMR}$  (100 MHz,  $\text{CDCl}_3$ )  $\delta$ : 154.2, 139.1, 137.8, 129.0, 124.4, 119.4, 115.9, 52.4, 21.6.

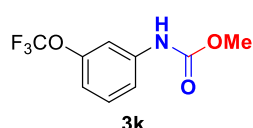

**3k.** 56.5 mg, 80% yield; white solid. m.p. = 79-81 °C. **<sup>1</sup>H NMR** (400 MHz, CDCl<sub>3</sub>) δ: 7.43 (s, 1H), 7.31-7.22 (m, 2H), 6.97 (br, 1H), 6.92-6.89 (m, 1H), 3.78 (s, 3H). **<sup>13</sup>C NMR** (100 MHz, CDCl<sub>3</sub>) δ: 154.0, 149.8 (q, *J* = 1.9 Hz), 139.5, 130.2, 120.5 (q, *J* = 256 Hz), 116.8, 115.6, 111.5, 52.7. **<sup>19</sup>F NMR** (376 MHz, CDCl<sub>3</sub>) δ: -57.8 (3×F). **HRMS** (ESI) *m/z* calculated for C<sub>9</sub>H<sub>9</sub>O<sub>3</sub>NF<sub>3</sub><sup>+</sup> [M+H]<sup>+</sup> 236.0529, found 236.0530.

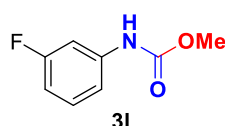

**3l.** 42 mg, 83% yield; white solid. **<sup>1</sup>H NMR** (400 MHz, CDCl<sub>3</sub>) δ: 7.35 (d, *J* = 10.8 Hz, 1H), 7.25 (td, *J* = 8.4, 6.8 Hz, 1H), 7.05 (d, *J* = 8.4 Hz, 1H), 6.86 (br, 1H), 6.78 (tdd, *J* = 8.4, 2.4, 0.8 Hz, 1H), 3.80 (s, 3H). **<sup>13</sup>C NMR** (100 MHz, CDCl<sub>3</sub>) δ: 163.3 (d, *J* = 243 Hz), 153.9, 139.6 (d, *J* = 11 Hz), 130.3 (d, *J* = 9.5 Hz), 114.0, 110.2 (d, *J* = 21 Hz), 106.2 (d, *J* = 26 Hz), 52.6.

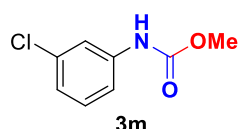

**3m.** 42 mg, 76% yield; white solid. **<sup>1</sup>H NMR** (400 MHz, CDCl<sub>3</sub>) δ: 7.50 (s, 1H), 7.22-7.18 (m, 2H), 7.04-7.01 (m, 1H), 6.81 (br, 1H), 3.77 (s, 3H). **<sup>13</sup>C NMR** (100 MHz, CDCl<sub>3</sub>) δ: 153.9, 139.2, 134.8, 130.1, 123.6, 118.8, 116.7, 52.6.

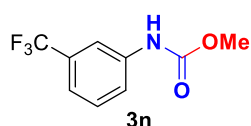

**3n.** 54.5 mg, 83% yield; white solid. **<sup>1</sup>H NMR** (400 MHz, CDCl<sub>3</sub>) δ: 7.71 (s, 1H), 7.56 (d, *J* = 8.0 Hz, 1H), 7.40 (t, *J* = 8.0 Hz, 1H), 7.31 (d, *J* = 8.0 Hz, 1H), 6.96 (br, 1H), 3.79 (s, 3H). **<sup>13</sup>C NMR** (100 MHz, CDCl<sub>3</sub>) δ: 154.1, 138.6, 131.6 (q, *J* = 32 Hz), 129.7, 124.0 (q, *J* = 271 Hz), 121.7, 120.1 (q, *J* = 3.7 Hz), 115.4, 52.7.

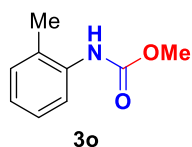

**3o.** 41 mg, 82% yield; white solid. **<sup>1</sup>H NMR** (400 MHz, CDCl<sub>3</sub>) δ: 7.76 (br, 1H), 7.21 (t, *J* = 8.0 Hz, 1H), 7.16 (d, *J* = 7.2 Hz, 1H), 7.04 (t, *J* = 7.2 Hz, 1H), 6.46 (s, 1H), 3.78 (s, 3H), 2.25 (s, 3H). **<sup>13</sup>C NMR** (100 MHz, CDCl<sub>3</sub>) δ: 154.5, 135.9, 130.5 (2×C), 127.0, 124.3, 121.3, 52.5, 17.7.

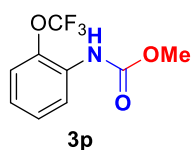

**3p.** 54 mg, 76% yield; white solid. **<sup>1</sup>H NMR** (400 MHz, CDCl<sub>3</sub>) δ: 8.19 (d, *J* = 7.6 Hz, 1H), 7.30-7.22 (m, 2H), 7.07-7.03 (m, 1H), 6.96 (br, 1H), 3.80 (s, 3H). **<sup>13</sup>C NMR** (100 MHz, CDCl<sub>3</sub>) δ: 153.7, 137.8, 130.8, 127.7, 123.4, 120.7 (q, *J* = 258 Hz), 120.5 (q, *J* = 1.0 Hz), 120.4, 52.7.

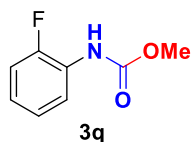

**3q.** 39.5 mg, 78% yield; colorless oil. **<sup>1</sup>H NMR** (400 MHz, CDCl<sub>3</sub>) δ: 8.13-8.03 (m, 1H), 7.14-6.96 (m, 3H), 6.89 (br, 1H), 3.79 (s, 3H). **<sup>13</sup>C NMR** (100 MHz, CDCl<sub>3</sub>) δ: 153.8, 152.2 (d, *J* = 241 Hz), 126.5 (d, *J* = 10 Hz), 124.7 (d, *J* = 3.7 Hz), 123.5 (d, *J* = 7.2 Hz), 120.3, 114.9 (d, *J* = 18.9 Hz), 52.7. **<sup>19</sup>F NMR** (376 MHz, CDCl<sub>3</sub>) δ: -129.9.

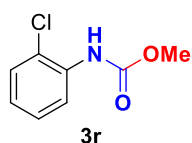

**3r.** 44.5 mg, 80% yield; colorless oil. **<sup>1</sup>H NMR** (400 MHz, CDCl<sub>3</sub>) δ: 8.18 (d, *J* = 8.0 Hz, 1H), 7.36 (dd, *J* = 8.0, 1.6 Hz, 1H), 7.29 (td, *J* = 8.0, 1.2 Hz, 1H), 7.18 (br, 1H), 7.01 (td, *J* = 8.0, 1.6 Hz, 1H), 3.82 (s,



3H).  $^{13}\text{C}$  NMR (100 MHz,  $\text{CDCl}_3$ )  $\delta$ : 153.8, 134.8, 129.2, 127.9, 123.8, 122.2, 120.0, 52.7.

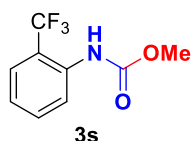

**3s.** 51 mg, 77% yield; white solid.  $^1\text{H}$  NMR (400 MHz,  $\text{CDCl}_3$ )  $\delta$ : 8.12 (d,  $J = 8.0$  Hz, 1H), 7.58-7.82 (m, 2H), 7.17 (t,  $J = 8.0$  Hz, 1H), 6.95 (br, 1H), 3.80 (s, 3H).  $^{13}\text{C}$  NMR (100 MHz,  $\text{CDCl}_3$ )  $\delta$ : 154.0, 135.7, 133.1, 126.2 (q,  $J = 5.3$  Hz), 124.2 (q,  $J = 271$  Hz), 123.6, 122.6, 119.3 (q,  $J = 28.5$  Hz), 52.8.  $^{19}\text{F}$  NMR (376 MHz,  $\text{CDCl}_3$ )  $\delta$ : -60.8 (3xF).

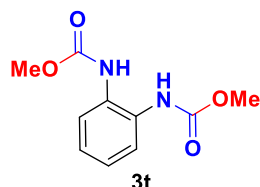

**3t.** 42 mg, 63% yield; white solid.  $^1\text{H}$  NMR (400 MHz,  $\text{CDCl}_3$ )  $\delta$ : 10.51 (br, 1H), 8.42 (dd,  $J = 8.4, 0.8$  Hz, 1H), 8.00 (dd,  $J = 8.4, 1.6$  Hz, 1H), 7.53 (ddd,  $J = 8.4, 7.6, 1.6$  Hz, 1H), 7.04-7.00 (m, 1H), 3.91 (s, 3H), 3.78 (s, 3H).  $^{13}\text{C}$  NMR (100 MHz,  $\text{CDCl}_3$ )  $\delta$ : 168.6, 154.2, 141.9, 134.7, 131.0, 121.7, 118.9, 114.6, 52.4

(2xC).

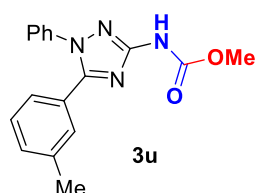

**3u.** 49 mg, 53% yield; colorless oil.  $^1\text{H}$  NMR (400 MHz,  $\text{CDCl}_3$ )  $\delta$ : 8.69 (br, 1H), 7.40-7.33 (m, 6H), 7.21-7.12 (m, 3H), 3.68 (s, 3H), 2.29 (s, 3H).  $^{13}\text{C}$  NMR (100 MHz,  $\text{CDCl}_3$ )  $\delta$ : 156.2, 153.4, 153.2, 138.5, 138.0, 131.1, 129.8, 129.3 (2xC), 128.9, 128.3, 127.2, 126.1, 128.8 (2xC), 52.8, 21.4. **HRMS** (ESI)  $m/z$

calculated for  $\text{C}_{17}\text{H}_{17}\text{O}_2\text{N}_4$   $[\text{M}+\text{H}]^+$  309.1346, found 309.1344.

**General Procedure B:** To a stirred solution of aliphatic amide substrate (0.3 mmol) in the  $\text{MeCN}/\text{H}_2\text{O}$  (10/1, 1.1 mL) at  $0^\circ\text{C}$  were added KCl (34 mg, 0.45 mmol) and Oxone (138 mg, 0.45 mmol). After completion of the addition, the resulting mixture was stirred for 10 min before warmed to room temperature and stirred for an additional 2 h. When the aromatic amide substrate was fully consumed as determined by TLC analysis, methanol (1.5 mL) and  $\text{Cs}_2\text{CO}_3$  (147 mg, 0.45 mmol) was added sequentially. The mixture was allowed to be stirred for 5 hrs and quenched by addition of sat. aq.  $\text{Na}_2\text{SO}_3$  (5 mL). Volatiles (mainly methanol and MeCN) was removed under reduced pressure and the aqueous mixture was extracted with EA (3 X 10 mL). The combined organic fractions were washed with brine, dried over  $\text{Na}_2\text{SO}_4$ , and concentrated under reduced pressure. The residue was purified by flash column chromatography on silica gel using eluents (petroleum ether/ethyl acetate = 10/1) to provide the desired compound **3**.

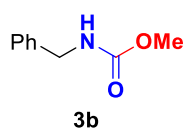

**3b.** 44 mg, 89% yield; white solid.  $^1\text{H}$  NMR (400 MHz,  $\text{CDCl}_3$ )  $\delta$ : 7.37-7.27 (m, 5H), 5.18 (br, 1H), 4.38 (d,  $J = 6.0$  Hz, 2H), 3.71 (s, 3H).  $^{13}\text{C}$  NMR (100 MHz,  $\text{CDCl}_3$ )  $\delta$ : 157.2, 138.6, 128.7 (2xC), 127.6, 127.5 (2xC), 52.3, 45.1.

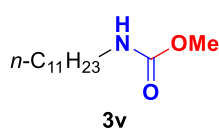

**3v.** 60 mg, 87% yield; white solid. m.p. =  $49-51^\circ\text{C}$ .  $^1\text{H}$  NMR (400 MHz,  $\text{CDCl}_3$ )  $\delta$ : 4.71 (br, 1H), 3.64 (s, 3H), 3.15 (q,  $J = 6.8$  Hz, 2H), 1.50-1.43 (m, 2H), 1.30-1.23 (m, 16H), 0.86 (t,  $J = 6.8$  Hz, 3H).  $^{13}\text{C}$  NMR (100 MHz,  $\text{CDCl}_3$ )  $\delta$ : 157.2, 52.1, 41.2, 32.0, 30.1, 29.7 (2xC),

29.6, 29.5, 29.4, 26.8, 22.8, 14.2. **HRMS** (ESI)  $m/z$  calculated for  $C_{13}H_{28}O_2N^+$   $[M+H]^+$  230.2115, found 230.2116.

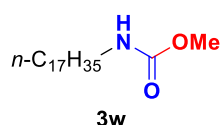

**3w.** 83 mg, 88% yield; white solid. m.p. = 51-53 °C.  **$^1\text{H NMR}$**  (400 MHz,  $\text{CDCl}_3$ )  $\delta$ : 4.71 (br, 1H), 3.64 (s, 3H), 3.14 (q,  $J = 6.8$  Hz, 2H), 1.48-1.23 (m, 30H), 0.86 (t,  $J = 6.8$  Hz, 3H).  **$^{13}\text{C NMR}$**  (100 MHz,  $\text{CDCl}_3$ )  $\delta$ : 157.2, 52.1, 41.2, 32.0, 30.1, 29.81 (2xC), 29.79 (2xC),

29.78 (2xC), 29.76, 29.7, 29.6, 29.5, 29.4, 26.8, 22.8, 14.2. **HRMS** (ESI)  $m/z$  calculated for  $C_{19}H_{40}O_2N^+$   $[M+H]^+$  314.3054, found 314.3049.

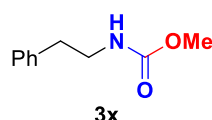

**3x.** 46 mg, 86% yield; colorless oil.  **$^1\text{H NMR}$**  (400 MHz,  $\text{CDCl}_3$ )  $\delta$ : 7.33-7.29 (m, 2H), 7.25-7.18 (m, 3H), 4.71 (br, 1H), 3.65 (s, 3H), 3.42 (q,  $J = 6.8$  Hz, 2H), 2.81 (t,  $J = 6.8$  Hz, 2H).  **$^{13}\text{C NMR}$**  (100 MHz,  $\text{CDCl}_3$ )  $\delta$ : 157.1, 138.9, 128.9 (2xC), 128.8 (2xC), 126.6, 52.2, 42.3,

36.3.

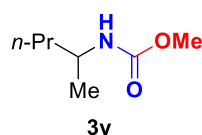

**3y.** 34.5 mg, 79% yield; colorless oil.  **$^1\text{H NMR}$**  (400 MHz,  $\text{CDCl}_3$ )  $\delta$ : 4.49 (br, 1H), 3.70-3.64 (m, 1H), 3.63 (s, 3H), 1.41-1.27 (m, 4H), 1.11 (d,  $J = 6.4$  Hz, 3H), 0.89 (t,  $J = 7.2$  Hz, 3H).  **$^{13}\text{C NMR}$**  (100 MHz,  $\text{CDCl}_3$ )  $\delta$ : 156.6, 51.9, 46.9, 39.5, 21.4, 19.3, 14.0. **HRMS** (ESI)  $m/z$

calculated for  $C_7H_{16}O_2N^+$   $[M+H]^+$  146.1176, found 146.1177.

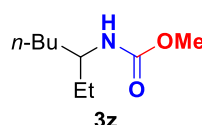

**3z.** 46 mg, 88% yield; colorless oil.  **$^1\text{H NMR}$**  (400 MHz,  $\text{CDCl}_3$ )  $\delta$ : 4.45 (br, 1H), 3.63 (s, 3H), 3.54-3.47 (m, 1H), 1.54-1.24 (m, 8H), 0.89-0.85 (m, 6H).  **$^{13}\text{C NMR}$**  (100 MHz,  $\text{CDCl}_3$ )  $\delta$ : 157.0, 52.7, 52.0, 34.7, 28.2, 28.1, 22.7, 14.1, 10.2.

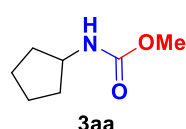

**3aa.** 33 mg, 76% yield; colorless oil.  **$^1\text{H NMR}$**  (400 MHz,  $\text{CDCl}_3$ )  $\delta$ : 4.66 (br, 1H), 3.97-3.95 (m, 1H), 3.63 (s, 3H), 1.97-1.89 (m, 2H), 1.69-1.52 (m, 4H), 1.41-1.33 (m, 2H).  **$^{13}\text{C NMR}$**  (100 MHz,  $\text{CDCl}_3$ )  $\delta$ : 156.7, 52.9, 52.0, 33.3 (2xC), 23.6 (2xC).

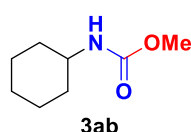

**3ab.** 37 mg, 78% yield; white solid.  **$^1\text{H NMR}$**  (400 MHz,  $\text{CDCl}_3$ )  $\delta$ : 4.64 (br, 1H), 3.62 (s, 3H), 3.49-3.41 (m, 1H), 1.92-1.88 (m, 2H), 1.70-1.64 (m, 2H), 1.59-1.54 (m, 1H), 1.36-1.23 (m, 2H), 1.18-1.05 (m, 3H).  **$^{13}\text{C NMR}$**  (100 MHz,  $\text{CDCl}_3$ )  $\delta$ : 156.3, 51.9, 49.9, 33.5, 25.6 (2xC), 24.9

(2xC).

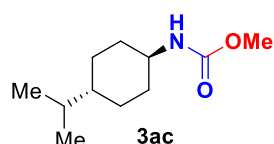

**3ac.** 50 mg, 84% yield; colorless oil.  **$^1\text{H NMR}$**  (400 MHz,  $\text{CDCl}_3$ )  $\delta$ : 4.57 (br, 1H), 3.62 (s, 3H), 3.43-3.23 (m, 1H), 2.03-1.94 (m, 2H), 1.74-1.67 (m, 2H), 1.46-1.34 (m, 1H), 1.10-0.95 (m, 5H), 0.83 (d,  $J = 6.8$  Hz, 6H).  **$^{13}\text{C NMR}$**  (100 MHz,  $\text{CDCl}_3$ )  $\delta$ : 156.4,

51.9, 50.5, 43.3, 33.7, 32.6 (2xC), 28.5 (2xC), 20.0 (2xC).

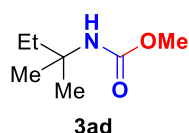

**3ad.** 24.5 mg, 56% yield; colorless oil.  $^1\text{H NMR}$  (400 MHz,  $\text{CDCl}_3$ )  $\delta$ : 4.53 (br, 1H), 3.60 (s, 3H), 1.65 (q,  $J = 7.6$  Hz, 2H), 1.26 (s, 6H), 0.85 (t,  $J = 7.6$  Hz, 3H).  $^{13}\text{C NMR}$  (100 MHz,  $\text{CDCl}_3$ )  $\delta$ : 155.5, 53.0, 51.5, 33.2, 29.8, 26.7, 8.5. **HRMS** (ESI)  $m/z$  calculated for  $\text{C}_7\text{H}_{16}\text{O}_2\text{N}^+$   $[\text{M}+\text{H}]^+$  146.1176, found 146.1176.

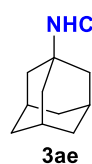

**3ae.** 45 mg, 72% yield; white solid.  $^1\text{H NMR}$  (400 MHz,  $\text{CDCl}_3$ )  $\delta$ : 4.55 (br, 1H), 3.58 (s, 3H), 2.05 (s, 3H), 1.90 (d,  $J = 1.6$  Hz, 6H), 1.64 (t,  $J = 3.2$  Hz, 6H).  $^{13}\text{C NMR}$  (100 MHz,  $\text{CDCl}_3$ )  $\delta$ : 155.1, 51.4, 50.7, 41.9 (3 $\times$ C), 36.4 (3 $\times$ C), 29.5 (3 $\times$ C).

### The Screening of Solvents

Many solvents were applied to the oxidation of aldehydes for Curtius rearrangements. The results were summarized in Table 1. We found that  $\text{PhCF}_3$  outperformed other solvents (except  $\text{CCl}_4$ ) to secure the best yield. Octafluorotoluene is much more expensive than  $\text{PhCF}_3$ .

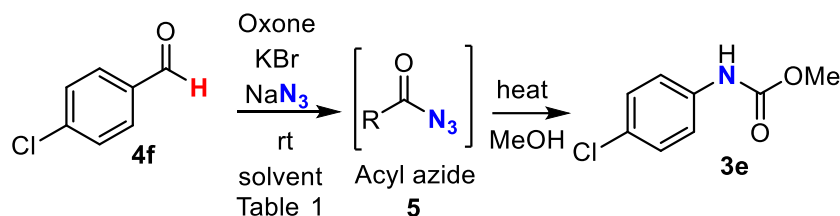

| Entry | Solvent                  | Yield (%) |
|-------|--------------------------|-----------|
| 1     | $\text{CHCl}_3$          | 68        |
| 2     | $\text{CH}_2\text{Cl}_2$ | 57        |
| 3     | $\text{CCl}_4$           | 76        |
| 4     | pentane                  | 50        |
| 5     | hexane                   | 46        |
| 6     | heptane                  | 33        |
| 7     | octane                   | 27        |
| 8     | nonane                   | 26        |
| 9     | decane                   | 20        |
| 10    | petroleum ether (60-90)  | 26        |
| 11    | naphthane                | 38        |
| 12    | cyclohexane              | 45        |
| 13    | Methylcyclohexane        | 46        |
| 14    | Ethylcyclohexane         | 45        |
| 15    | toluene                  | 53        |
| 16    | cumene                   | 21        |
| 17    | DMF                      | 0         |
| 18    | THF                      | 0         |

|    |                                    |           |
|----|------------------------------------|-----------|
| 19 | MeCN                               | 0         |
| 20 | ethyl acetate                      | 0         |
| 21 | ether                              | 0         |
| 22 | 1,4-dioxane                        | 0         |
| 23 | anisole                            | 0         |
| 24 | isopropanol                        | 0         |
| 25 | <i>t</i> BuOH                      | 0         |
| 26 | methanol                           | 0         |
| 27 | ethanol                            | <b>0</b>  |
| 28 | CF <sub>3</sub> CH <sub>2</sub> OH | <b>38</b> |
| 29 | perfluorohexane                    | 58        |
| 30 | perfluorobenzene                   | 65        |
| 31 | PhCF <sub>3</sub>                  | 71        |
| 32 | octafluorotoluene                  | 71        |

<sup>a</sup>Condition: to a solution of **4f** (0.3 mmol) in the solvent (3 mL, ACS grade and used as received) at rt were added KBr (0.45 mmol), Oxone (0.45 mmol) and NaN<sub>3</sub> (0.6 mmol). After stirring for 24 hrs, the reaction mixture was filtered and the filtrate was concentrated. The residue was dissolved in dry toluene/MeOH [10:1 (v/v), 3.3 mL] and stirred at 100 °C for 2 hrs. The reaction progress was monitored by TLC.

### **Oxone-KBr Mediated Azidation of Aldehydes for Curtius Rearrangement**

**General Procedure C:** To a stirred solution of aromatic aldehyde substrate (0.3 mmol) in the PhCF<sub>3</sub> (analytical grade, 3.0 mL) or CCl<sub>4</sub> (analytical grade, 3.0 mL) at 0 °C were added KBr (54 mg, 0.45 mmol) and Oxone (166 mg, 0.54 mmol) and stirred for 5 min. Then sodium azide (49 mg, 0.75 mmol or 43 mg, 0.66 mmol) was added. After the completion of the addition, the resulting mixture was stirred for 5 min before warmed to room temperature and vigorously stirred for an additional 24-36 h. When the aromatic aldehyde substrate was fully consumed as determined by TLC analysis, the mixture was filtered through a pad of celite. The filtrate was concentrated under reduced pressure and the residue was used for the next step without further purification. An oven-dried pressure tube under nitrogen atmosphere was charged with the residue and dry toluene (3 mL) and MeOH (0.3 mL). The reaction mixture was heated to 100°C for 2 hours and then cooled to room temperature. The solvent (toluene and methanol) was removed under reduced pressure and the residue was purified by flash chromatography on silica gel using eluents (petroleum ether/ethyl acetate = 10/1) to provide the desired compound **3**.

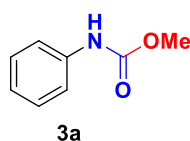

**3a.** 38.5 mg, 85% yield (PhCF<sub>3</sub>); 40 mg, 89% yield (CCl<sub>4</sub>); white solid. <sup>1</sup>H NMR (400 MHz, CDCl<sub>3</sub>) δ: 7.40-7.37 (m, 2H), 7.33-7.28 (m, 2H), 7.09-7.04 (m, 1H), 6.70 (br, s), 3.78 (s, 3H). <sup>13</sup>C NMR (100 MHz, CDCl<sub>3</sub>) δ: 154.2, 137.9, 129.2 (2×C), 123.6 (2×C), 118.8, 52.5.

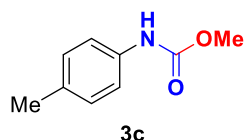

118.9 (2x), 52.4, 20.9.

**3c.** 41 mg, 83% yield (PhCF<sub>3</sub>); 37.5 mg, 76% yield (CCl<sub>4</sub>); white solid. **<sup>1</sup>H NMR** (400 MHz, CDCl<sub>3</sub>) δ: 7.26 (d, *J* = 8.4 Hz, 2H), 7.11 (d, *J* = 8.4 Hz, 2H), 6.62 (br, 1H), 3.76 (s, 3H), 2.30 (s, 3H). **<sup>13</sup>C NMR** (100 MHz, CDCl<sub>3</sub>) δ: 154.3, 135.3, 133.2, 129.7 (2x),

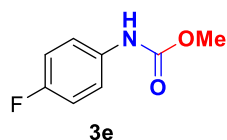

Hz, 2x), 52.5.

**3e.** 36 mg, 71% yield (PhCF<sub>3</sub>); 39.5 mg, 78% yield (CCl<sub>4</sub>); white solid. **<sup>1</sup>H NMR** (400 MHz, CDCl<sub>3</sub>) δ: 7.36-7.30 (m, 2H), 7.02-6.96 (m, 2H), 6.78 (br, 1H), 3.76 (s, 3H). **<sup>13</sup>C NMR** (100 MHz, CDCl<sub>3</sub>) δ: 159.1 (d, *J* = 241 Hz), 154.4, 133.9, 120.6 (2x), 115.8 (d, *J* = 23

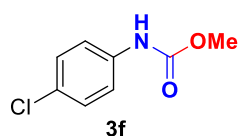

**3f.** 45.5 mg, 82% yield (PhCF<sub>3</sub>); 48 mg, 86% yield (CCl<sub>4</sub>); white solid. **<sup>1</sup>H NMR** (400 MHz, CDCl<sub>3</sub>) δ: 7.36-7.33 (m, 2H), 7.28-7.25 (m, 2H), 6.77 (br, 1H), 3.78 (s, 3H). **<sup>13</sup>C NMR** (100 MHz, CDCl<sub>3</sub>) δ: 154.1, 136.6, 129.1 (2x), 128.5, 120.0 (2x), 52.6.

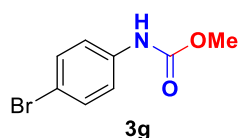

**3g.** 50.5 mg, 73% yield (PhCF<sub>3</sub>); 57.5 mg, 83% yield (CCl<sub>4</sub>); white solid. **<sup>1</sup>H NMR** (400 MHz, CDCl<sub>3</sub>) δ: 7.40 (d, *J* = 8.8 Hz, 2H), 7.28 (d, *J* = 8.8 Hz, 2H), 6.79 (br, 1H), 3.76 (s, 3H). **<sup>13</sup>C NMR** (100 MHz, CDCl<sub>3</sub>) δ: 154.0, 137.1, 132.1 (2x), 120.3 (2x), 116.0, 52.6.

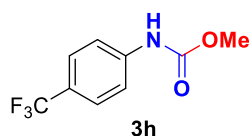

(q, *J* = 33 Hz), 124.3 (q, *J* = 270 Hz), 118.2 (2x), 52.8.

**3h.** 45 mg, 68% yield (PhCF<sub>3</sub>); 50 mg, 76% yield (CCl<sub>4</sub>); white solid. **<sup>1</sup>H NMR** (400 MHz, CDCl<sub>3</sub>) δ: 7.55 (d, *J* = 8.8 Hz, 2H), 7.50 (d, *J* = 8.8 Hz, 2H), 6.93 (br, 1H), 3.79 (s, 3H). **<sup>13</sup>C NMR** (100 MHz, CDCl<sub>3</sub>) δ: 153.8, 141.1, 126.5 (q, *J* = 3.4 Hz, 2x), 125.3

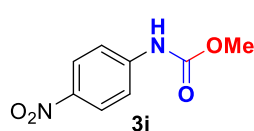

53.1.

**3i.** 39 mg, 66% yield (PhCF<sub>3</sub>); 34 mg, 58% yield (CCl<sub>4</sub>); yellowish solid. **<sup>1</sup>H NMR** (400 MHz, CDCl<sub>3</sub>) δ: 8.20 (d, *J* = 9.2 Hz, 2H), 7.56 (d, *J* = 9.2 Hz, 2H), 7.04 (br, 1H), 3.82 (s, 3H). **<sup>13</sup>C NMR** (100 MHz, CDCl<sub>3</sub>) δ: 153.4, 144.0, 143.1, 125.4 (2x), 117.8 (2x),

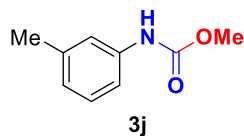

119.4, 115.9, 52.4, 21.6.

**3j.** 39 mg, 79% yield (PhCF<sub>3</sub>); 38 mg, 77% yield (CCl<sub>4</sub>); white solid. **<sup>1</sup>H NMR** (400 MHz, CDCl<sub>3</sub>) δ: 7.23 (s, 1H), 7.21-7.17 (m, 2H), 6.89-6.87 (m, 1H), 6.70 (br, 1H), 3.77 (s, 3H), 2.33 (s, 3H). **<sup>13</sup>C NMR** (100 MHz, CDCl<sub>3</sub>) δ: 154.2, 139.1, 137.8, 129.0, 124.4,

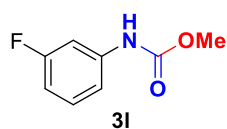

(d, *J* = 21 Hz), 106.2 (d, *J* = 26 Hz), 52.6.

**3l.** 40 mg, 79% yield (PhCF<sub>3</sub>); 39 mg, 77% yield (CCl<sub>4</sub>); white solid. **<sup>1</sup>H NMR** (400 MHz, CDCl<sub>3</sub>) δ: 7.35 (d, *J* = 10.8 Hz, 1H), 7.25 (td, *J* = 8.4, 6.8 Hz, 1H), 7.05 (d, *J* = 8.4 Hz, 1H), 6.86 (br, 1H), 6.78 (tdd, *J* = 8.4, 2.4, 0.8 Hz, 1H), 3.80 (s, 3H). **<sup>13</sup>C NMR** (100 MHz, CDCl<sub>3</sub>)

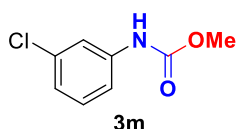

**3m.** 43.5 mg, 78% yield (PhCF<sub>3</sub>); 48 mg, 86% yield (CCl<sub>4</sub>); white solid. **<sup>1</sup>H NMR** (400 MHz, CDCl<sub>3</sub>) δ: 7.50 (s, 1H), 7.22-7.18 (m, 2H), 7.04-7.01 (m, 1H), 6.81 (br, 1H), 3.77 (s, 3H). **<sup>13</sup>C NMR** (100 MHz, CDCl<sub>3</sub>) δ: 153.9, 139.2, 134.8, 130.1, 123.6, 118.8, 116.7,

52.6.

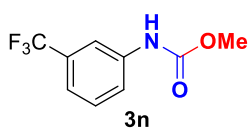

**3n.** 58 mg, 88% yield (PhCF<sub>3</sub>); 50.5 mg, 77% yield (CCl<sub>4</sub>); white solid. **<sup>1</sup>H NMR** (400 MHz, CDCl<sub>3</sub>) δ: 7.71 (s, 1H), 7.56 (d, *J* = 8.0 Hz, 1H), 7.40 (t, *J* = 8.0 Hz, 1H), 7.31 (d, *J* = 8.0 Hz, 1H), 6.96 (br, 1H), 3.79 (s, 3H). **<sup>13</sup>C NMR** (100 MHz, CDCl<sub>3</sub>) δ: 154.1, 138.6,

131.6 (q, *J* = 32 Hz), 129.7, 124.0 (q, *J* = 271 Hz), 121.7, 120.1 (q, *J* = 3.7 Hz), 115.4,

52.7.

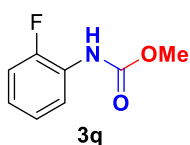

**3q.** 0 mg, 0% yield (PhCF<sub>3</sub>); 27 mg, 53% yield (CCl<sub>4</sub>); colorless oil. **<sup>1</sup>H NMR** (400 MHz, CDCl<sub>3</sub>) δ: 8.13-8.03 (m, 1H), 7.14-6.96 (m, 3H), 6.89 (br, 1H), 3.79 (s, 3H). **<sup>13</sup>C NMR** (100 MHz, CDCl<sub>3</sub>) δ: 153.8, 152.2 (d, *J* = 241 Hz), 126.5 (d, *J* = 10 Hz), 124.7 (d, *J* = 3.7 Hz), 123.5 (d, *J* =

7.2 Hz), 120.3, 114.9 (d, *J* = 18.9 Hz), 52.7. **<sup>19</sup>F NMR** (376 MHz, CDCl<sub>3</sub>) δ: -129.9.

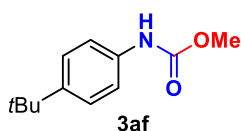

**3af.** 49 mg, 79% yield (PhCF<sub>3</sub>); 48.5 mg, 78% yield (CCl<sub>4</sub>); white solid. **<sup>1</sup>H NMR** (400 MHz, CDCl<sub>3</sub>) δ: 7.32 (s, 4H), 6.74 (br, 1H), 3.77 (s, 3H), 1.31 (s, 9H). **<sup>13</sup>C NMR** (100 MHz, CDCl<sub>3</sub>) δ: 154.3, 146.5, 135.3, 126.0 (2×C), 118.6 (2×C), 52.4, 34.4, 31.5 (3×C).

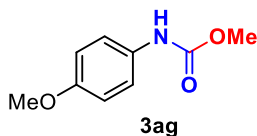

**3ag.** 33.5 mg, 62% yield (PhCF<sub>3</sub>); 44.5 mg, 82% yield (CCl<sub>4</sub>); white solid. **<sup>1</sup>H NMR** (400 MHz, CDCl<sub>3</sub>) δ: 7.28 (d, *J* = 8.8 Hz, 2H), 6.84 (d, *J* = 8.8 Hz, 2H), 6.66 (br, 1H), 3.78 (s, 3H), 3.75 (s, 3H). **<sup>13</sup>C NMR** (100 MHz, CDCl<sub>3</sub>) δ: 156.0, 155.0, 131.0, 120.8 (2×C), 114.3 (2×C),

55.6, 52.4.

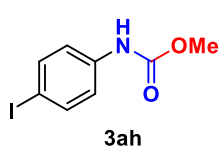

**3ah.** 60 mg, 72% yield (PhCF<sub>3</sub>); 68 mg, 82% yield (CCl<sub>4</sub>); white solid. **<sup>1</sup>H NMR** (400 MHz, CDCl<sub>3</sub>) δ: 7.57 (d, *J* = 8.8 Hz, 2H), 7.16 (d, *J* = 8.8 Hz, 2H), 6.84 (br, 1H), 3.76 (s, 3H). **<sup>13</sup>C NMR** (100 MHz, CDCl<sub>3</sub>) δ: 154.0, 138.0 (2×C), 137.8, 120.6 (2×C), 86.4, 52.6.

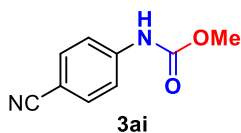

**3ai.** 35.5 mg, 67% yield (PhCF<sub>3</sub>); 40 mg, 75% yield (CCl<sub>4</sub>); white solid. **<sup>1</sup>H NMR** (400 MHz, CDCl<sub>3</sub>) δ: 7.58 (d, *J* = 8.8 Hz, 2H), 7.52 (d, *J* = 8.8 Hz, 2H), 7.19 (br, 1H), 3.79 (s, 3H). **<sup>13</sup>C NMR** (100 MHz, CDCl<sub>3</sub>) δ: 153.6, 142.3, 133.4 (2×C), 119.1, 118.4 (2×C), 106.1, 52.9.

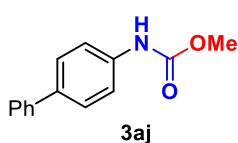

**3aj.** 54.5 mg, 80% yield (PhCF<sub>3</sub>); 54 mg, 79% yield (CCl<sub>4</sub>); yellowish solid. **<sup>1</sup>H NMR** (400 MHz, CDCl<sub>3</sub>) δ: 7.58-7.54 (m, 4H), 7.47-7.41 (m, 4H), 7.35-7.30 (m, 1H), 6.74 (br, 1H), 3.80 (s, 3H). **<sup>13</sup>C NMR** (100 MHz, CDCl<sub>3</sub>) δ: 154.2, 140.6, 137.2, 136.5, 128.9

(2×C), 127.8 (2×C), 127.2 (2×C), 126.9 (2×C), 119.1, 52.6.

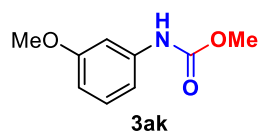

3ak

**3ak.** 35.5 mg, 65% yield (PhCF<sub>3</sub>); 46 mg, 85% yield (CCl<sub>4</sub>); yellowish solid. **<sup>1</sup>H NMR** (400 MHz, CDCl<sub>3</sub>) δ: 7.18 (t, *J* = 8.4 Hz, 1H), 7.12 (s, 1H), 6.86 (dd, *J* = 8.4, 1.2 Hz, 1H), 6.78 (br, 1H), 6.61 (ddd, *J* = 8.4, 2.4, 0.8 Hz, 1H), 3.79 (s, 3H), 3.76 (s, 3H). **<sup>13</sup>C NMR** (100 MHz, CDCl<sub>3</sub>) δ: 160.3, 154.1, 139.2, 129.8, 110.9, 109.3, 104.4, 55.4, 52.4.

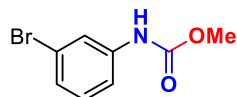

3al

**3al.** 59 mg, 85% yield (PhCF<sub>3</sub>); 57 mg, 82% yield (CCl<sub>4</sub>); white solid. **<sup>1</sup>H NMR** (400 MHz, CDCl<sub>3</sub>) δ: 7.64 (s, 1H), 7.28 (d, *J* = 7.6 Hz, 1H), 7.20-7.13 (m, 2H), 6.80 (br, 1H), 3.77 (s, 3H). **<sup>13</sup>C NMR** (100 MHz, CDCl<sub>3</sub>) δ: 153.9, 139.3, 130.4, 126.5, 122.8, 121.6, 117.2, 52.7.

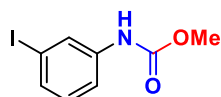

3am

**3am.** 64 mg, 77% yield (PhCF<sub>3</sub>); 67 mg, 81% yield (CCl<sub>4</sub>); white solid. m.p. = 66-68 °C. **<sup>1</sup>H NMR** (400 MHz, CDCl<sub>3</sub>) δ: 7.79 (s, 1H), 7.39 (ddd, *J* = 8.0, 1.6, 0.8 Hz, 1H), 7.34 (d, *J* = 8.0 Hz, 1H), 7.01 (t, *J* = 8.0 Hz, 1H), 6.70 (br, 1H), 3.77 (s, 3H). **<sup>13</sup>C NMR** (100 MHz, CDCl<sub>3</sub>) δ: 153.8, 139.1, 132.6, 130.6, 127.4, 117.9, 94.4, 53.7. **HRMS** (ESI) *m/z* calculated for C<sub>8</sub>H<sub>9</sub>O<sub>2</sub>Ni<sup>+</sup> [M+H]<sup>+</sup> 277.9673, found 277.9673.

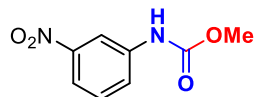

3an

**3an.** 34 mg, 58% yield (PhCF<sub>3</sub>); 35 mg, 59% yield (CCl<sub>4</sub>); yellowish solid. **<sup>1</sup>H NMR** (400 MHz, CDCl<sub>3</sub>) δ: 8.29 (t, *J* = 2.0 Hz, 1H), 7.91 (ddd, *J* = 8.4, 2.0, 0.8 Hz, 1H), 7.76 (d, *J* = 8.4 Hz, 1H), 7.47 (t, *J* = 8.4 Hz, 1H), 6.96 (br, 1H), 3.82 (s, 3H). **<sup>13</sup>C NMR** (100 MHz, CDCl<sub>3</sub>) δ: 153.8, 148.8, 139.2, 130.0, 124.2, 118.2, 113.4, 52.9.

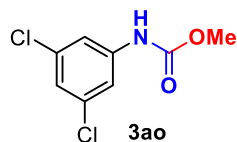

3ao

**3ao.** 56 mg, 85% yield (PhCF<sub>3</sub>); 55 mg, 83% yield (CCl<sub>4</sub>); white solid. **<sup>1</sup>H NMR** (400 MHz, CDCl<sub>3</sub>) δ: 7.34 (d, *J* = 1.2 Hz, 2H), 7.05 (t, *J* = 2.0 Hz, 1H), 6.67 (br, 1H), 3.79 (s, 3H). **<sup>13</sup>C NMR** (100 MHz, CDCl<sub>3</sub>) δ: 153.6, 139.8, 135.5 (2×C), 123.5 (2×C), 116.9, 52.9.

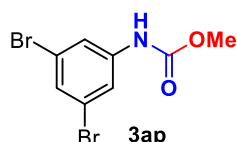

3ap

**3ap.** 67 mg, 72% yield (PhCF<sub>3</sub>); 75 mg, 81% yield (CCl<sub>4</sub>); white solid. m.p. = 41-43 °C. **<sup>1</sup>H NMR** (400 MHz, CDCl<sub>3</sub>) δ: 7.52 (s, 2H), 7.33 (t, *J* = 1.6 Hz, 1H), 6.89 (br, 1H), 3.78 (s, 3H). **<sup>13</sup>C NMR** (100 MHz, CDCl<sub>3</sub>) δ: 153.7, 140.2, 128.9 (2×C), 123.2 (2×C), 120.2, 52.9. **HRMS** (ESI) *m/z* calculated for C<sub>8</sub>H<sub>8</sub>O<sub>2</sub>NBr<sub>2</sub><sup>+</sup> [M+H]<sup>+</sup> 307.8916, found 307.8917.

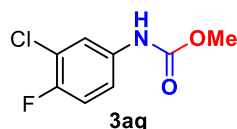

3aq

**3aq.** 51 mg, 84% yield (PhCF<sub>3</sub>); 50 mg, 82% yield (CCl<sub>4</sub>); white solid. m.p. = 88-90 °C. **<sup>1</sup>H NMR** (400 MHz, CDCl<sub>3</sub>) δ: 7.56-7.52 (m, 1H), 7.20-7.17 (m, 1H), 7.05 (t, *J* = 8.8 Hz, 1H), 6.87 (br, 1H), 3.77 (s, 3H). **<sup>13</sup>C NMR** (100 MHz, CDCl<sub>3</sub>) δ: 154.4 (d, *J* = 243 Hz), 154.2, 134.6, 121.2 (d, *J* = 19 Hz), 121.0, 118.4, 116.7 (d, *J* = 22 Hz), 52.7. **<sup>19</sup>F NMR** (376 MHz, CDCl<sub>3</sub>) δ: -122.1. **HRMS** (ESI) *m/z* calculated for C<sub>8</sub>H<sub>8</sub>O<sub>2</sub>NCIF<sup>+</sup> [M+H]<sup>+</sup> 204.0222, found 204.0223.9

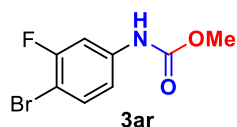

3ar

**3ar.** 52 mg, 70% yield (PhCF<sub>3</sub>); 59 mg, 79% yield (CCl<sub>4</sub>); white solid. **<sup>1</sup>H NMR** (400 MHz, CDCl<sub>3</sub>) δ: 7.41 (dd, *J* = 8.8, 7.6 Hz, 2H), 6.96 (dd, *J* = 8.8, 1.6 Hz, 1H), 6.90 (br, 1H), 3.77 (s, 3H). **<sup>13</sup>C NMR**

(100 MHz, CDCl<sub>3</sub>) δ: 159.3 (d, *J* = 244 Hz), 153.8, 138.8 (d, *J* = 10 Hz), 133.4 (d, *J* = 1.3 Hz), 115.2, 107.2 (d, *J* = 28 Hz), 102.3 (d, *J* = 21 Hz), 52.8. <sup>19</sup>F NMR (376 MHz, CDCl<sub>3</sub>) δ: -105.4.

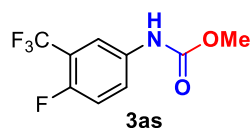

3as

**3as.** 53 mg, 74% yield (PhCF<sub>3</sub>); 56 mg, 79% yield (CCl<sub>4</sub>); white solid. m.p. = 68-70 °C. <sup>1</sup>H NMR (400 MHz, CDCl<sub>3</sub>) δ: 7.66-7.64 (m, 1H), 7.58-7.55 (m, 1H), 7.13 (t, *J* = 9.2 Hz, 1H), 6.86 (br, 1H), 3.78 (s, 3H). <sup>13</sup>C NMR (100 MHz, CDCl<sub>3</sub>) δ: 155.7 (d, *J* = 253 Hz), 154.4, 134.2 (d, *J* = 2.0 Hz), 128.7 (d, *J* = 82 Hz), 124.0, 122.4 (q, *J* = 270 Hz), 118.6 (qd, *J* = 33, 14 Hz), 117.5 (d, *J* = 22 Hz), 52.7. <sup>19</sup>F NMR (376 MHz, CDCl<sub>3</sub>) δ: -61.7 (d, *J* = 12 Hz, 3×F), -121.5. HRMS (ESI) *m/z* calculated for C<sub>9</sub>H<sub>8</sub>O<sub>2</sub>NF<sub>4</sub> [M+H]<sup>+</sup> 238.0486, found 238.0486.

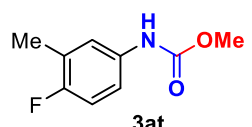

3at

**3at.** 43.5 mg, 79% yield (PhCF<sub>3</sub>); 41 mg, 75% yield (CCl<sub>4</sub>); white solid. m.p. = 41-43 °C. <sup>1</sup>H NMR (400 MHz, CDCl<sub>3</sub>) δ: 7.23-7.19 (m, 1H), 7.13-7.10 (m, 1H), 6.92 (t, *J* = 9.2 Hz, 1H), 6.63 (br, 1H), 3.76 (s, 3H), 2.24 (d, *J* = 2.0 Hz, 3H). <sup>13</sup>C NMR (100 MHz, CDCl<sub>3</sub>) δ: 157.7 (d, *J* = 240 Hz), 154.4, 133.5, 125.5 (d, *J* = 18 Hz), 122.1, 117.8, 115.3 (d, *J* = 23 Hz), 52.5, 14.8 (d, *J* = 3.1 Hz). <sup>19</sup>F NMR (376 MHz, CDCl<sub>3</sub>) δ: -123.8. HRMS (ESI) *m/z* calculated for C<sub>9</sub>H<sub>11</sub>O<sub>2</sub>NF [M+H]<sup>+</sup> 184.0768, found 184.0769.

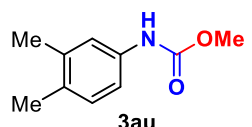

3au

**3au.** 44.5 mg, 83% yield (PhCF<sub>3</sub>); 43 mg, 80% yield (CCl<sub>4</sub>); yellowish solid. <sup>1</sup>H NMR (400 MHz, CDCl<sub>3</sub>) δ: 7.16-7.04 (m, 3H), 6.58 (br, 1H), 3.76 (s, 3H), 2.23 (s, 3H), 2.21 (s, 3H). <sup>13</sup>C NMR (100 MHz, CDCl<sub>3</sub>) δ: 154.3, 137.4, 135.6, 131.9, 130.1, 120.2, 116.3, 52.4, 30.0, 19.2.

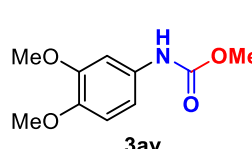

3av

**3av.** 39 mg, 62% yield (PhCF<sub>3</sub>); 46 mg, 73% yield (CCl<sub>4</sub>); white solid. <sup>1</sup>H NMR (400 MHz, CDCl<sub>3</sub>) δ: 7.17 (br, 1H), 6.78-6.73 (m, 3H), 3.84 (s, 3H), 3.82 (s, 3H), 3.74 (s, 3H). <sup>13</sup>C NMR (100 MHz, CDCl<sub>3</sub>) δ: 154.5, 149.2, 145.3, 131.5, 111.5, 110.7, 103.9, 56.2, 55.9, 52.4.

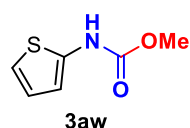

3aw

**3aw.** 22 mg, 47% yield (PhCF<sub>3</sub>); 31.5 mg, 67% yield (CCl<sub>4</sub>); white solid. <sup>1</sup>H NMR (400 MHz, CDCl<sub>3</sub>) δ: 7.34 (br, 1H), 6.86 (d, *J* = 5.2 Hz, 1H), 6.81 (dd, *J* = 5.2, 3.6 Hz, 1H), 6.60 (d, *J* = 2.4 Hz, 1H), 3.80 (s, 3H). <sup>13</sup>C NMR (100 MHz, CDCl<sub>3</sub>) δ: 154.2, 139.9, 124.7, 117.7, 112.5, 53.0.

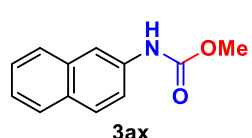

3ax

**3ax.** 48 mg, 79% yield (PhCF<sub>3</sub>); 48 mg, 79% yield (CCl<sub>4</sub>); white solid. <sup>1</sup>H NMR (400 MHz, CDCl<sub>3</sub>) δ: 7.99 (s, 1H), 7.77 (d, *J* = 8.8 Hz, 2H), 7.76 (d, *J* = 8.0 Hz, 1H), 7.47-7.37 (m, 3H), 6.91 (br, 1H), 3.82 (s, 3H). <sup>13</sup>C NMR (100 MHz, CDCl<sub>3</sub>) δ: 154.3, 135.4, 134.0, 130.3, 129.0, 127.7, 127.5, 126.6, 124.8, 119.3, 115.0, 52.6.

### **Oxone-KBr Mediated Azidation of Aldehydes to Afford Acyl Azides**

**General Procedure D:** To a stirred solution of aromatic aldehyde substrate (0.3 mmol) in the PhCF<sub>3</sub> (analytical grade, 3.0 mL) or CCl<sub>4</sub> (analytical grade, 3.0 mL) at 0 °C were added KBr (54 mg, 0.45 mmol) and Oxone (166 mg, 0.54 mmol) and stirred for 5 min.



Then sodium azide (49 mg, 0.75 mmol or 43 mg, 0.66 mmol) was added. After the completion of the addition, the resulting mixture was vigorously stirred for 5 min before warmed to room temperature and stirred for an additional 24-36 h. When the aromatic aldehyde substrate was fully consumed as determined by TLC analysis, the mixture was filtered through a pad of celite. The filtrate was concentrated under reduced pressure and the residue was purified by flash chromatography on silica gel using eluents (petroleum ether/ethyl acetate = 50/1) to provide the desired compound **5**.

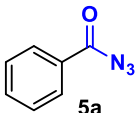 **5a**. 37 mg, 84% yield (PhCF<sub>3</sub>); 38 mg, 86% yield (CCl<sub>4</sub>); colorless oil. <sup>1</sup>H NMR (400 MHz, CDCl<sub>3</sub>) δ: 8.04-8.01 (m, 2H), 7.64-7.60 (m, 1H), 7.48-7.44 (m, 2H). <sup>13</sup>C NMR (100 MHz, CDCl<sub>3</sub>) δ: 172.7, 134.5, 130.8, 129.6 (2×C), 128.8 (2×C).

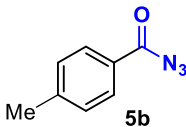 **5b**. 32 mg, 66% yield (PhCF<sub>3</sub>); 34.5 mg, 71% yield (CCl<sub>4</sub>); colorless oil. <sup>1</sup>H NMR (400 MHz, CDCl<sub>3</sub>) δ: 7.92 (d, *J* = 8.4 Hz, 2H), 7.25 (d, *J* = 8.4 Hz, 2H), 2.42 (s, 3H). <sup>13</sup>C NMR (100 MHz, CDCl<sub>3</sub>) δ: 172.5, 145.6, 129.7 (2×C), 129.5 (2×C), 128.1, 21.9.

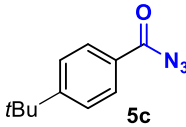 **5c**. 49 mg, 80% yield (PhCF<sub>3</sub>); 44.5 mg, 73% yield (CCl<sub>4</sub>); white solid. <sup>1</sup>H NMR (400 MHz, CDCl<sub>3</sub>) δ: 7.96 (d, *J* = 8.8 Hz, 2H), 7.47 (d, *J* = 8.8 Hz, 2H), 1.34 (s, 9H). <sup>13</sup>C NMR (100 MHz, CDCl<sub>3</sub>) δ: 172.5, 158.5, 129.5 (2×C), 128.1, 125.8 (2×C), 35.4, 31.2 (3×C).

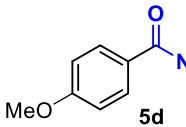 **5d**. 31 mg, 58% yield (PhCF<sub>3</sub>); 41 mg, 77% yield (CCl<sub>4</sub>); white solid. <sup>1</sup>H NMR (400 MHz, CDCl<sub>3</sub>) δ: 7.97 (d, *J* = 8.8 Hz, 2H), 6.91 (d, *J* = 8.8 Hz, 2H), 3.86 (s, 3H). <sup>13</sup>C NMR (100 MHz, CDCl<sub>3</sub>) δ: 171.8, 164.7, 131.8 (2×C), 123.3, 114.0 (2×C), 55.6.

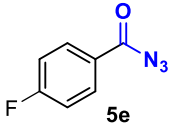 **5e**. 35.5 mg, 72% yield (PhCF<sub>3</sub>); 36 mg, 73% yield (CCl<sub>4</sub>); white solid. <sup>1</sup>H NMR (400 MHz, CDCl<sub>3</sub>) δ: 8.08-8.03 (m, 2H), 7.16-7.10 (m, 2H). <sup>13</sup>C NMR (100 MHz, CDCl<sub>3</sub>) δ: 171.5, 166.8 (d, *J* = 255 Hz), 132.3 (d, *J* = 9.5 Hz, 2×C), 127.1 (d, *J* = 2.8 Hz), 116.1 (d, *J* = 22 Hz, 2×C). <sup>19</sup>F NMR (376 MHz, CDCl<sub>3</sub>) δ: -103.0.

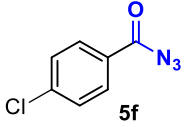 **5f**. 42.5 mg, 78% yield (PhCF<sub>3</sub>); 45 mg, 83% yield (CCl<sub>4</sub>); white solid. <sup>1</sup>H NMR (400 MHz, CDCl<sub>3</sub>) δ: 7.95 (d, *J* = 8.8 Hz, 2H), 7.42 (d, *J* = 8.8 Hz, 2H). <sup>13</sup>C NMR (100 MHz, CDCl<sub>3</sub>) δ: 171.7, 141.1, 130.9 (2×C), 129.2, 129.1 (2×C).

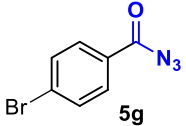 **5g**. 47 mg, 69% yield (PhCF<sub>3</sub>); 53 mg, 78% yield (CCl<sub>4</sub>); white solid. <sup>1</sup>H NMR (400 MHz, CDCl<sub>3</sub>) δ: 7.88 (d, *J* = 8.8 Hz, 2H), 7.60 (d, *J* = 8.8 Hz, 2H). <sup>13</sup>C NMR (100 MHz, CDCl<sub>3</sub>) δ: 171.9, 132.2 (2×C), 131.0 (2×C), 129.9, 129.6.

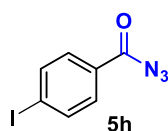

**5h.** 61.5 mg, 75% yield (PhCF<sub>3</sub>); 63 mg, 77% yield (CCl<sub>4</sub>); white solid. **<sup>1</sup>H NMR** (400 MHz, CDCl<sub>3</sub>) δ: 7.82 (d, *J* = 8.4 Hz, 2H), 7.72 (d, *J* = 8.4 Hz, 2H). **<sup>13</sup>C NMR** (100 MHz, CDCl<sub>3</sub>) δ: 172.2, 138.2 (2×C), 130.8 (2×C), 130.2, 102.8.

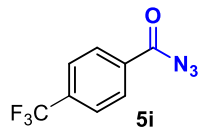

**5i.** 53 mg, 82% yield (PhCF<sub>3</sub>); 44.5 mg, 69% yield (CCl<sub>4</sub>); colorless oil. **<sup>1</sup>H NMR** (400 MHz, CDCl<sub>3</sub>) δ: 8.14 (d, *J* = 8.0 Hz, 2H), 7.72 (d, *J* = 8.0 Hz, 2H). **<sup>13</sup>C NMR** (100 MHz, CDCl<sub>3</sub>) δ: 171.6, 135.7 (q, *J* = 32.5 Hz), 133.8, 130.0 (2×C), 125.9 (q, *J* = 3.6 Hz, 2×C), 123.6 (q, *J* = 271 Hz). **<sup>19</sup>F NMR** (376 MHz, CDCl<sub>3</sub>) δ: -63.3 (3×F).

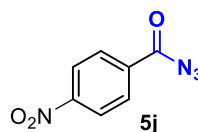

**5j.** 34.5 mg, 60% yield (PhCF<sub>3</sub>); 33 mg, 57% yield (CCl<sub>4</sub>); yellowish solid. **<sup>1</sup>H NMR** (400 MHz, CDCl<sub>3</sub>) δ: 8.30 (d, *J* = 9.2 Hz, 2H), 8.20 (d, *J* = 9.2 Hz, 2H). **<sup>13</sup>C NMR** (100 MHz, CDCl<sub>3</sub>) δ: 171.0, 151.3, 135.8, 130.7 (2×C), 123.9 (2×C).

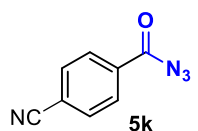

**5k.** 36 mg, 70% yield (PhCF<sub>3</sub>); 34.5 mg, 67% yield (CCl<sub>4</sub>); white solid. **<sup>1</sup>H NMR** (400 MHz, CDCl<sub>3</sub>) δ: 8.13 (d, *J* = 8.8 Hz, 2H), 7.76 (d, *J* = 8.8 Hz, 2H). **<sup>13</sup>C NMR** (100 MHz, CDCl<sub>3</sub>) δ: 171.3, 134.3, 132.6 (2×C), 130.0 (2×C), 117.8, 117.7.

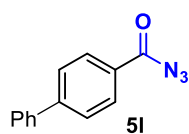

**5l.** 51 mg, 76% yield (PhCF<sub>3</sub>); 47.5 mg, 71% yield (CCl<sub>4</sub>); white solid. **<sup>1</sup>H NMR** (400 MHz, CDCl<sub>3</sub>) δ: 8.10 (d, *J* = 8.8 Hz, 2H), 7.68 (d, *J* = 8.8 Hz, 2H), 7.64-7.61 (m, 2H), 7.51-7.46 (m, 2H), 7.44-7.40 (m, 1H). **<sup>13</sup>C NMR** (100 MHz, CDCl<sub>3</sub>) δ: 172.4, 147.2, 139.7, 130.1 (2×C), 129.5, 129.1 (2×C), 128.6, 127.4 (4×C).

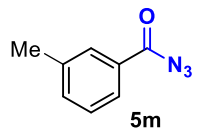

**5m.** 39 mg, 81% yield (PhCF<sub>3</sub>); 35 mg, 72% yield (CCl<sub>4</sub>); colorless oil. **<sup>1</sup>H NMR** (400 MHz, CDCl<sub>3</sub>) δ: 7.85-7.81 (m, 2H), 7.43 (d, *J* = 8.0 Hz, 1H), 7.34 (t, *J* = 8.0 Hz, 1H), 2.41 (s, 3H). **<sup>13</sup>C NMR** (100 MHz, CDCl<sub>3</sub>) δ: 172.8, 138.7, 135.3, 130.7, 130.1, 128.7, 126.8, 21.4.

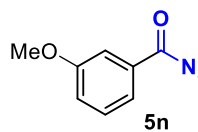

**5n.** 32.5 mg, 61% yield (PhCF<sub>3</sub>); 43 mg, 81% yield (CCl<sub>4</sub>); colorless oil. **<sup>1</sup>H NMR** (400 MHz, CDCl<sub>3</sub>) δ: 7.62 (ddd, *J* = 8.0, 1.6, 1.2 Hz, 1H), 7.54 (dd, *J* = 2.4, 1.6 Hz, 1H), 7.36 (t, *J* = 8.0 Hz, 1H), 7.16 (ddd, *J* = 8.0, 2.8, 0.8 Hz, 1H), 3.86 (s, 3H). **<sup>13</sup>C NMR** (100 MHz, CDCl<sub>3</sub>) δ: 172.6, 159.9, 132.0, 129.8, 122.1, 121.2, 113.6, 55.6.

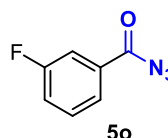

**5o.** 38.5 mg, 78% yield (PhCF<sub>3</sub>); 36 mg, 72% yield (CCl<sub>4</sub>); colorless oil. **<sup>1</sup>H NMR** (400 MHz, CDCl<sub>3</sub>) δ: 7.83 (ddd, *J* = 7.6, 1.6, 1.2 Hz, 1H), 7.71 (ddd, *J* = 9.2, 2.4, 1.6 Hz, 1H), 7.45 (td, *J* = 8.0, 5.6 Hz, 1H), 7.32 (tdd, *J* = 8.4, 2.8, 1.2 Hz, 1H). **<sup>13</sup>C NMR** (100 MHz, CDCl<sub>3</sub>) δ: 171.6 (d, *J* = 3.0 Hz), 162.7 (d, *J* = 247 Hz), 132.8 (d, *J* = 7.4 Hz), 130.5 (d, *J* = 7.6 Hz), 125.3 (d, *J* = 3.2 Hz), 121.5 (d, *J* = 21 Hz), 116.4 (d, *J* = 23 Hz). **<sup>19</sup>F NMR** (376 MHz, CDCl<sub>3</sub>) δ: -111.6.

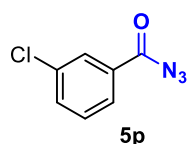

**5p.** 41 mg, 75% yield (PhCF<sub>3</sub>); 43.5 mg, 80% yield (CCl<sub>4</sub>); colorless oil. **<sup>1</sup>H NMR** (400 MHz, CDCl<sub>3</sub>) δ: 8.01 (t, *J* = 1.6 Hz, 1H), 7.91 (ddd, *J* = 8.0, 1.6, 1.2 Hz, 1H), 7.59 (ddd, *J* = 8.0, 2.0, 1.2 Hz, 1H), 7.41 (t, *J* = 8.0 Hz, 1H). **<sup>13</sup>C NMR** (100 MHz, CDCl<sub>3</sub>) δ: 171.6, 135.1, 134.4, 132.4, 130.1, 129.6, 127.7.

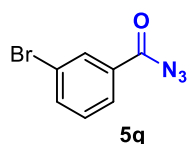

**5q.** 47.5 mg, 70% yield (PhCF<sub>3</sub>); 52 mg, 77% yield (CCl<sub>4</sub>); colorless oil. **<sup>1</sup>H NMR** (400 MHz, CDCl<sub>3</sub>) δ: 8.16 (t, *J* = 1.6 Hz, 1H), 7.95 (dt, *J* = 8.0, 1.2 Hz, 1H), 7.74 (ddd, *J* = 8.0, 2.0, 1.2 Hz, 1H), 7.34 (t, *J* = 8.0 Hz, 1H). **<sup>13</sup>C NMR** (100 MHz, CDCl<sub>3</sub>) δ: 171.4, 137.3, 132.6, 132.5, 130.4, 128.1, 122.9.

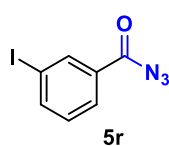

**5r.** 66 mg, 81% yield (PhCF<sub>3</sub>); 62 mg, 76% yield (CCl<sub>4</sub>); colorless oil. **<sup>1</sup>H NMR** (400 MHz, CDCl<sub>3</sub>) δ: 8.35 (t, *J* = 1.6 Hz, 1H), 7.98 (ddd, *J* = 8.0, 1.6, 1.2 Hz, 1H), 7.93 (ddd, *J* = 8.0, 1.6, 1.2 Hz, 1H), 7.20 (t, *J* = 8.0 Hz, 1H). **<sup>13</sup>C NMR** (100 MHz, CDCl<sub>3</sub>) δ: 171.2, 143.2, 138.3, 132.5, 130.4, 128.7, 94.1.

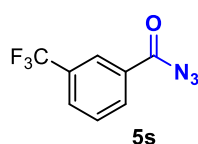

**5s.** 50.5 mg, 78% yield (PhCF<sub>3</sub>); 44 mg, 68% yield (CCl<sub>4</sub>); colorless oil. **<sup>1</sup>H NMR** (400 MHz, CDCl<sub>3</sub>) δ: 8.29 (s, 1H), 8.22 (d, *J* = 8.0 Hz, 1H), 7.88 (dd, *J* = 8.0, 0.8 Hz, 1H), 7.62 (t, *J* = 8.0 Hz, 1H). **<sup>13</sup>C NMR** (100 MHz, CDCl<sub>3</sub>) δ: 171.5, 132.7, 131.6, 131.5 (q, *J* = 33 Hz), 130.9 (q, *J* = 3.6 Hz), 129.6, 126.5 (q, *J* = 3.8 Hz), 123.6 (q, *J* = 271 Hz). **<sup>19</sup>F NMR** (376 MHz, CDCl<sub>3</sub>) δ: -62.9 (3×F).

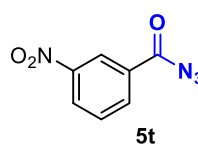

**5t.** 33.5 mg, 58% yield (PhCF<sub>3</sub>); 32 mg, 56% yield (CCl<sub>4</sub>); yellowish solid. **<sup>1</sup>H NMR** (400 MHz, CDCl<sub>3</sub>) δ: 8.86 (t, *J* = 2.0 Hz, 1H), 8.47 (ddd, *J* = 8.0, 2.4, 1.2 Hz, 1H), 8.36 (dt, *J* = 8.0, 1.2 Hz, 1H), 7.69 (t, *J* = 8.0 Hz, 1H). **<sup>13</sup>C NMR** (100 MHz, CDCl<sub>3</sub>) δ: 170.7, 148.5, 135.0, 132.4, 130.1, 128.7, 124.5.

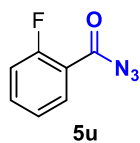

**5u.** 0 mg, 0% yield (PhCF<sub>3</sub>); 26 mg, 53% yield (CCl<sub>4</sub>); colorless oil. **<sup>1</sup>H NMR** (400 MHz, CDCl<sub>3</sub>) δ: 7.93 (td, *J* = 7.6, 2.0 Hz, 1H), 7.61-7.55 (m, 1H), 7.22 (td, *J* = 8.0, 1.2 Hz, 1H), 7.16 (ddd, *J* = 10.8, 8.4, 1.2 Hz, 1H). **<sup>13</sup>C NMR** (100 MHz, CDCl<sub>3</sub>) δ: 170.0 (d, *J* = 4.4 Hz), 162.3 (d, *J* = 261 Hz), 136.0 (d, *J* = 9.2 Hz), 132.0, 124.3 (d, *J* = 3.8 Hz), 119.2 (d, *J* = 8.6 Hz), 117.4 (d, *J* = 22 Hz). **<sup>19</sup>F NMR** (376 MHz, CDCl<sub>3</sub>) δ: -131.0.

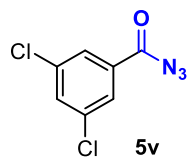

**5v.** 52.5 mg, 81% yield (PhCF<sub>3</sub>); 50.5 mg, 78% yield (CCl<sub>4</sub>); white solid. **<sup>1</sup>H NMR** (400 MHz, CDCl<sub>3</sub>) δ: 7.89 (d, *J* = 2.0 Hz, 2H), 7.59 (t, *J* = 2.0 Hz). **<sup>13</sup>C NMR** (100 MHz, CDCl<sub>3</sub>) δ: 170.5, 135.8, 134.1 (2×C), 133.4, 127.9 (2×C).

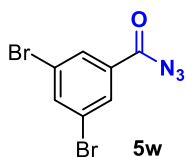

**5w.** 61 mg, 67% yield (PhCF<sub>3</sub>); 68 mg, 74% yield (CCl<sub>4</sub>); yellowish solid. <sup>1</sup>H NMR (400 MHz, CDCl<sub>3</sub>) δ: 8.08 (d, *J* = 1.6 Hz, 2H), 7.89 (t, *J* = 1.6 Hz, 1H). <sup>13</sup>C NMR (100 MHz, CDCl<sub>3</sub>) δ: 170.2, 139.6 (2×C), 133.8, 131.2 (2×C), 123.5.

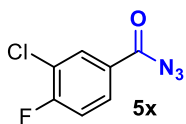

**5x.** 50 mg, 83% yield (PhCF<sub>3</sub>); 47 mg, 78% yield (CCl<sub>4</sub>); colorless oil. <sup>1</sup>H NMR (400 MHz, CDCl<sub>3</sub>) δ: 8.11 (dd, *J* = 7.2, 2.0 Hz, 1H), 7.94 (ddd, *J* = 8.8, 4.8, 2.0 Hz, 1H), 7.22 (t, *J* = 8.8 Hz, 1H). <sup>13</sup>C NMR (100 MHz, CDCl<sub>3</sub>) δ: 170.6, 162.1 (d, *J* = 257 Hz), 132.4, 130.0 (d, *J* = 8.7 Hz), 128.0 (d, *J* = 3.5 Hz), 122.1 (d, *J* = 18 Hz), 117.2 (d, *J* = 22 Hz). <sup>19</sup>F NMR (376 MHz, CDCl<sub>3</sub>) δ: -105.3.

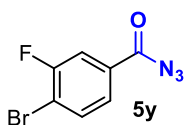

**5y.** 49 mg, 67% yield (PhCF<sub>3</sub>); 53 mg, 73% yield (CCl<sub>4</sub>); colorless oil. <sup>1</sup>H NMR (400 MHz, CDCl<sub>3</sub>) δ: 7.74 (dd, *J* = 8.8, 1.6 Hz, 1H), 7.70-7.63 (m, 2H). <sup>13</sup>C NMR (100 MHz, CDCl<sub>3</sub>) δ: 170.9 (d, *J* = 2.7 Hz), 159.2 (d, *J* = 248 Hz), 134.2, 131.8 (d, *J* = 6.7 Hz), 126.1 (d, *J* = 3.7 Hz), 117.2 (d, *J* = 24 Hz), 116.7 (d, *J* = 21 Hz). <sup>19</sup>F NMR (376 MHz, CDCl<sub>3</sub>) δ: -105.1.

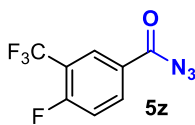

**5z.** 45 mg, 64% yield (PhCF<sub>3</sub>); 50 mg, 71% yield (CCl<sub>4</sub>); colorless oil. <sup>1</sup>H NMR (400 MHz, CDCl<sub>3</sub>) δ: 8.32 (dd, *J* = 6.8, 2.0 Hz, 1H), 8.25 (ddd, *J* = 8.4, 4.8, 2.0 Hz, 1H), 7.30 (t, *J* = 9.2 Hz, 1H). <sup>13</sup>C NMR (100 MHz, CDCl<sub>3</sub>) δ: 170.5, 163.5 (dq, *J* = 264, 1.6 Hz), 135.6 (d, *J* = 10 Hz), 129.3 (dq, *J* = 4.4, 3.0 Hz), 127.3 (d, *J* = 3.5 Hz), 122.0 (q, *J* = 271 Hz), 119.4 (qd, *J* = 33.8, 13.3 Hz), 117.8 (d, *J* = 21 Hz). <sup>19</sup>F NMR (376 MHz, CDCl<sub>3</sub>) δ: -61.8 (d, *J* = 12.7 Hz, 3×F), -104.6 (q, *J* = 12.7 Hz).

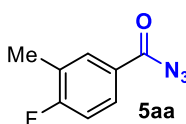

**5aa.** 42 mg, 78% yield (PhCF<sub>3</sub>); 39 mg, 72% yield (CCl<sub>4</sub>); colorless oil. <sup>1</sup>H NMR (400 MHz, CDCl<sub>3</sub>) δ: 7.90-7.83 (m, 2H), 7.05 (t, *J* = 8.8 Hz, 1H), 2.31 (d, *J* = 2.0 Hz, 3H). <sup>13</sup>C NMR (100 MHz, CDCl<sub>3</sub>) δ: 171.7, 165.4 (d, *J* = 254 Hz), 133.3 (d, *J* = 7.0 Hz), 129.6 (d, *J* = 9.6 Hz), 126.7 (d, *J* = 3.0 Hz), 125.8 (d, 18 Hz), 115.6 (d, *J* = 23 Hz), 14.6 (d, *J* = 3.5 Hz). <sup>19</sup>F NMR (376 MHz, CDCl<sub>3</sub>) δ: -107.1.

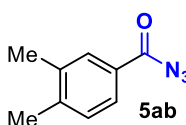

**5ab.** 42.5 mg, 81% yield (PhCF<sub>3</sub>); 40 mg, 76% yield (CCl<sub>4</sub>); yellowish solid. <sup>1</sup>H NMR (400 MHz, CDCl<sub>3</sub>) δ: 7.79 (s, 1H), 7.75 (dd, *J* = 8.0, 1.6 Hz, 1H), 7.20 (d, *J* = 8.0 Hz, 1H), 2.32 (s, 3H), 2.30 (s, 3H). <sup>13</sup>C NMR (100 MHz, CDCl<sub>3</sub>) δ: 172.7, 144.3, 137.3, 130.6, 130.1, 128.4, 127.3, 20.3, 19.8.

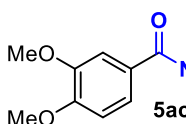

**5ac.** 36 mg, 58% yield (PhCF<sub>3</sub>); 42 mg, 68% yield (CCl<sub>4</sub>); white solid. <sup>1</sup>H NMR (400 MHz, CDCl<sub>3</sub>) δ: 7.66 (dd, *J* = 8.4, 2.0 Hz, 1H), 7.50 (d, *J* = 2.0 Hz, 1H), 6.87 (d, *J* = 8.4 Hz, 1H), 3.94 (s, 3H), 3.92 (s, 3H). <sup>13</sup>C NMR (100 MHz, CDCl<sub>3</sub>) δ: 171.8, 154.4, 149.0, 124.1, 123.4, 111.5, 110.4, 56.2, 56.1.

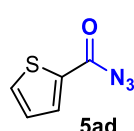

**5ad.** 19 mg, 41% yield (PhCF<sub>3</sub>); 28 mg, 61% yield (CCl<sub>4</sub>); colorless oil. <sup>1</sup>H NMR (400 MHz, CDCl<sub>3</sub>) δ: 7.85 (dd, *J* = 4.0, 1.2 Hz, 1H), 7.67 (dd, *J* = 4.8, 1.2 Hz, 1H), 7.14 (dd, *J* = 4.8, 4.0 Hz, 1H). <sup>13</sup>C NMR (100 MHz, CDCl<sub>3</sub>) δ: 166.8, 135.0, 134.9, 134.6, 128.6.

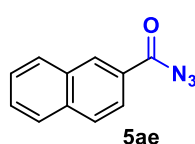

**5ae.** 40 mg, 68% yield (PhCF<sub>3</sub>); 44 mg, 74% yield (CCl<sub>4</sub>); colorless oil. <sup>1</sup>H NMR (400 MHz, CDCl<sub>3</sub>) δ: 8.60 (s, 1H), 8.03 (dd, *J* = 8.8, 2.0 Hz, 1H), 7.96 (dd, *J* = 8.0, 0.4 Hz, 1H), 7.89 (d, *J* = 8.8 Hz, 2H), 7.65-7.54 (m, 2H). <sup>13</sup>C NMR (100 MHz, CDCl<sub>3</sub>) δ: 172.7, 136.3, 132.5, 131.6, 129.8, 129.1, 128.7, 128.0, 127.9, 127.1, 124.7.

### Hofmann Rearrangement with Alcohol/Amine/Amide

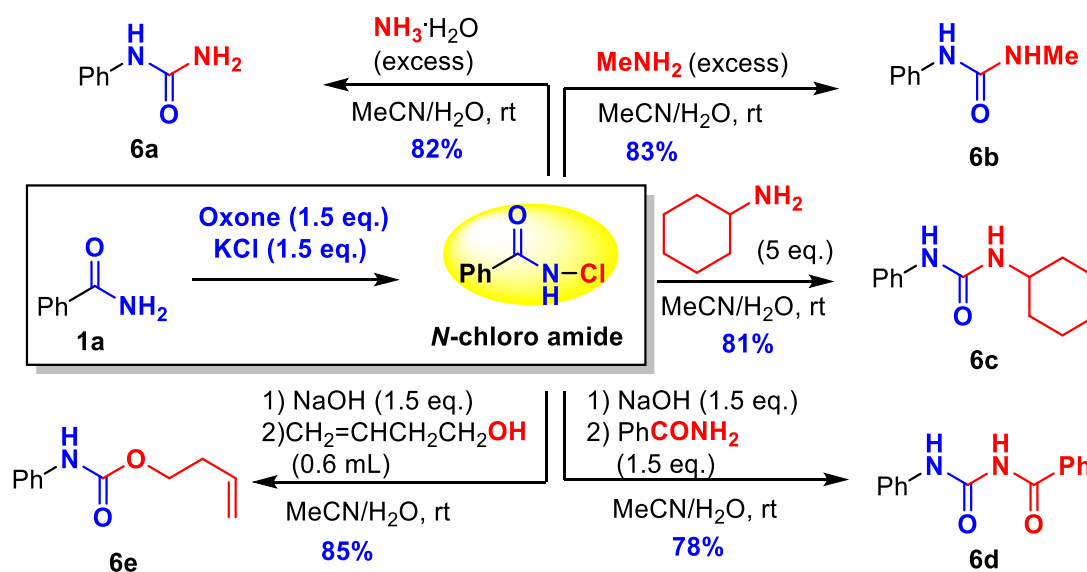

**Hofmann rearrangement with amine:** To a stirred solution of benzamide **1a** (37 mg, 0.3 mmol) in the MeCN/H<sub>2</sub>O (10/1, 1.1 mL) at 0 °C were added KCl (34 mg, 0.45 mmol) and Oxone (138 mg, 0.45 mmol). After completion of the addition, the resulting mixture was stirred for 10 min before warmed to room temperature and stirred for an additional 2 h. When the benzamide **1a** was fully consumed as determined by TLC analysis, ammonia solution (25%, 0.2 mL) or methylamine solution (40%, 0.2 mL) or cyclohexylamine (0.173 mL, 1.5 mmol) was added. The mixture was allowed to be stirred for 5 hrs and quenched by addition of sat. aq. Na<sub>2</sub>SO<sub>3</sub> (5 mL). Volatiles (mainly MeCN) was removed under reduced pressure and the aqueous mixture was extracted with EA (3 X 10 mL). The combined organic fractions were washed with brine, dried over Na<sub>2</sub>SO<sub>4</sub>, and concentrated under reduced pressure. The residue was purified by flash column chromatography on silica gel using eluents (petroleum ether/ethyl acetate = 5/1) to provide the desired urea **6a-6c**.

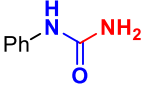**6a.** 33.5 mg, 82% yield, white solid. **<sup>1</sup>H NMR** (400 MHz, DMSO-*d*<sub>6</sub>) δ: 8.50 (br, 1H), 7.40-7.37 (m, 2H), 7.23-7.18 (m, 2H), 6.90-6.86 (m, 1H), 5.84 (br, 2H). **<sup>13</sup>C NMR** (100 MHz, DMSO-*d*<sub>6</sub>) δ: 156.0, 140.6, 128.6 (2×C), 121.1, 117.7 (2×C).

**6b.** 37 mg, 83% yield, white solid. **<sup>1</sup>H NMR** (400 MHz, DMSO-*d*<sub>6</sub>) δ: 8.48 (br, 1H), 7.38 (d, *J* = 7.6 Hz, 2H), 7.20 (t, *J* = 7.6 Hz, 2H), 6.87 (t, *J* = 7.6 Hz, 1H), 5.98 (q, *J* = 4.4 Hz, 1H), 2.63 (d, *J* = 4.4 Hz, 3H). **<sup>13</sup>C NMR** (100 MHz, DMSO-*d*<sub>6</sub>) δ: 155.9, 140.7, 128.7 (2×C), 121.0, 117.7 (2×C), 26.3.

**6c.** 53 mg, 81% yield, white solid. **<sup>1</sup>H NMR** (400 MHz, CDCl<sub>3</sub>) δ: 7.32-7.27 (m, 4H), 7.09-7.03 (m, 1H), 6.94 (br, 1H), 5.11 (br, 1H), 3.71-3.62 (m, 1H), 1.97-1.93 (m, 2H), 1.71-1.66 (m, 2H), 1.62-1.57 (m, 1H), 1.38-1.27 (m, 2H), 1.19-1.06 (m, 3H). **<sup>13</sup>C NMR** (100 MHz, CDCl<sub>3</sub>) δ: 155.5, 139.0, 129.3 (2×C), 123.5, 120.8 (2×C), 49.0, 33.8 (2×C), 25.7, 25.0 (2×C).

**Hofmann rearrangement with amide or alcohol:** To a stirred solution of benzamide **1a** (37 mg, 0.3 mmol) in the MeCN/H<sub>2</sub>O (10/1, 1.1 mL) at 0 °C were added KCl (34 mg, 0.45 mmol) and Oxone (138 mg, 0.45 mmol). After completion of the addition, the resulting mixture was stirred for 10 min before warmed to room temperature and stirred for an additional 2 h. When the benzamide **1a** was fully consumed as determined by TLC analysis, benzamide (55 mg, 0.45 mmol, to afford **6d**) or homoallyl alcohol (0.6 mL, to afford **6e**) and NaOH (18 mg, 0.45 mmol) was added sequentially. The mixture was allowed to be stirred for 5 hrs and quenched by addition of sat. aq. Na<sub>2</sub>SO<sub>3</sub> (5 mL). Volatiles (mainly MeCN and homoallyl alcohol) was removed under reduced pressure and the aqueous mixture was extracted with EA (3 X 10 mL). The combined organic fractions were washed with brine, dried over Na<sub>2</sub>SO<sub>4</sub>, and concentrated under reduced pressure. The residue was purified by flash column chromatography on silica gel using eluents (petroleum ether/ethyl acetate = 5/1) to provide the desired compounds **6d-6e**.

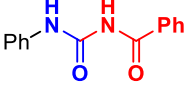**6d.** 51 mg, 78% yield, brownish solid. **<sup>1</sup>H NMR** (400 MHz, CDCl<sub>3</sub>) δ: 10.97 (br, 1H), 9.80 (br, 1H), 8.08-8.04 (m, 2H), 7.67-7.59 (m, 3H), 7.53 (t, *J* = 8.0 Hz, 2H), 7.39-7.34 (m, 2H), 7.18-7.14 (m, 1H). **<sup>13</sup>C NMR** (100 MHz, CDCl<sub>3</sub>) δ: 168.7, 152.0, 137.3, 133.5, 132.2, 129.1 (2×C), 129.0 (2×C), 128.1 (2×C), 124.6, 120.6 (2×C).

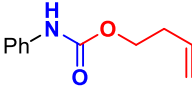**6e.** 49 mg, 85% yield, yellowish oil. **<sup>1</sup>H NMR** (400 MHz, CDCl<sub>3</sub>) δ: 7.40-7.37 (m, 2H), 7.32-7.28 (m, 2H), 7.08-7.04 (m, 1H), 6.67 (br, 1H), 5.83 (ddt, *J* = 17.2, 10.4, 6.8 Hz, 1H), 5.18-5.08 (m, 2H), 4.23 (t, *J* = 6.8 Hz, 2H), 2.44 (qt, *J* = 6.8, 1.2 Hz, 2H). **<sup>13</sup>C NMR** (100 MHz, CDCl<sub>3</sub>) δ: 153.6, 138.0, 134.2 (2×C), 129.2 (2×C), 123.5, 118.7, 117.5, 64.4, 33.5.

## Curtius Rearrangement with Amines to Generate (Chiral) Ureas/Amides

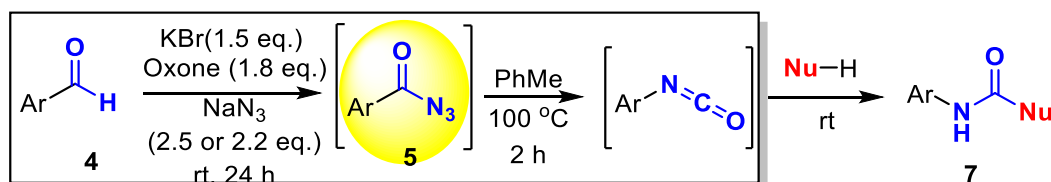

**Curtius rearrangement with benzoic acid to generate amide:** To a stirred solution of aromatic aldehyde substrate (0.2 mmol) in the PhCF<sub>3</sub> (analytical grade, 2.0 mL) or CCl<sub>4</sub> (analytical grade, 2.0 mL) at 0 °C were added KBr (36 mg, 0.3 mmol) and Oxone (111 mg, 0.36 mmol) and stirred for 5 min. Then sodium azide (29 mg, 0.44 mmol) was added. After the completion of the addition, the resulting mixture was stirred for 5 min before warmed to room temperature and stirred for an additional 24-36 h. When the aromatic aldehyde substrate was fully consumed as determined by TLC analysis, the mixture was filtered through a pad of celite. The filtrate was concentrated under reduced pressure and the residue was used for the next step without further purification. Following Mahajan's protocol<sup>1</sup>, an oven-dried pressure tube under nitrogen atmosphere was charged with the residue, benzoic acid (27 mg, 0.22 mmol), DBU (31 mg, 0.2 mmol) and dry toluene (1 mL). The reaction mixture was heated to 100 °C for 2 hours and then cooled to room temperature. The solvent (toluene) was removed under reduced pressure and the residue was purified by flash chromatography on silica gel using eluents (petroleum ether/ethyl acetate = 10/1) to provide the desired amide **7c** (34 mg, 73% yield or 37.5 mg, 81% yield) as a white solid.

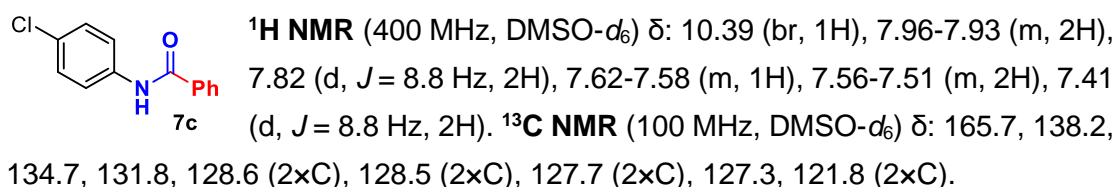

**Curtius rearrangement with amines to generate (chiral) ureas:** To a stirred solution of aromatic aldehyde substrate (0.2 mmol) in the PhCF<sub>3</sub> (analytical grade, 2.0 mL) or CCl<sub>4</sub> (analytical grade, 2.0 mL) at 0 °C were added KBr (36 mg, 0.3 mmol) and Oxone (111 mg, 0.36 mmol) and stirred for 5 min. Then sodium azide (29 mg, 0.44 mmol) was added. After the completion of the addition, the resulting mixture was stirred for 5 min before warmed to room temperature and stirred for an additional 24-36 h. When the aromatic aldehyde substrate was fully consumed as determined by TLC analysis, the mixture was filtered through a pad of celite. The filtrate was concentrated under reduced pressure and the residue was used for the next step without further purification. An oven-dried pressure tube under nitrogen atmosphere was charged with the residue and dry toluene (1 mL). The reaction mixture was heated to 100 °C for 2 hours and

then cooled to room temperature. The corresponding amine (0.22 mmol) was dissolved in dry toluene (1 mL) and added in one portion into the pressure tube under a positive pressure of nitrogen flow [in the case of **7a**, ammonia solution (25%, 0.1 mL) was used instead]. The resulting mixture was stirred at rt for 24 hours. The volatiles were removed under reduced pressure and the residue was purified by flash chromatography on silica gel using eluents (petroleum ether/ethyl acetate = 10/1) to provide the desired urea **7**.

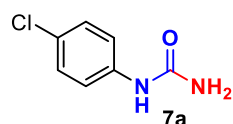

**7a.** 26 mg, 76% yield (PhCF<sub>3</sub>); 28 mg, 83% yield (CCl<sub>4</sub>); white solid. **<sup>1</sup>H NMR** (400 MHz, DMSO-*d*<sub>6</sub>) δ: 8.67 (br, 1H), 7.42 (d, *J* = 8.8 Hz, 2H), 7.24 (d, *J* = 8.8 Hz, 2H), 5.91 (br, 2H). **<sup>13</sup>C NMR** (100 MHz, DMSO-*d*<sub>6</sub>) δ: 155.9, 139.6, 128.5 (2×C), 124.5, 119.2 (2×C).

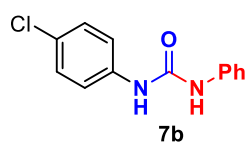

**7b.** 38.5 mg, 78% yield (PhCF<sub>3</sub>); 42 mg, 85% yield (CCl<sub>4</sub>); white solid. **<sup>1</sup>H NMR** (400 MHz, DMSO-*d*<sub>6</sub>) δ: 8.81 (s, 1H), 8.70 (s, 1H), 7.48 (d, *J* = 8.8 Hz, 2H), 7.46-7.43 (m, 2H), 7.32 (d, *J* = 8.8 Hz, 2H), 7.30-7.25 (m, 2H), 6.97 (t, *J* = 7.2 Hz, 1H). **<sup>13</sup>C NMR** (100 MHz, DMSO-*d*<sub>6</sub>) δ: 152.5, 139.6, 138.8, 128.9 (2×C), 128.7 (2×C), 125.3, 122.0, 119.7 (2×C), 118.3 (2×C).

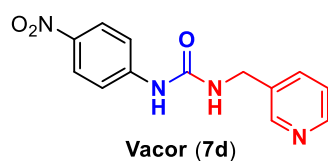

**7d.** 46 mg, 84% yield (PhCF<sub>3</sub>); 45 mg, 82% yield (CCl<sub>4</sub>); white solid. **<sup>1</sup>H NMR** (400 MHz, DMSO-*d*<sub>6</sub>) δ: 9.47 (s, 1H), 8.54 (d, *J* = 1.6 Hz, 1H), 8.46 (dd, *J* = 4.8, 1.6 Hz, 1H), 8.14 (d, *J* = 9.2 Hz, 2H), 7.72 (dt, *J* = 8.0, 2.0 Hz, 1H), 7.64 (d, *J* = 9.2 Hz, 2H), 7.36 (ddd, *J* = 7.6, 4.8, 0.4 Hz, 1H), 7.04 (t, *J* = 6.0 Hz, 1H), 4.35 (d, *J* = 6.0 Hz, 2H). **<sup>13</sup>C NMR** (100 MHz, DMSO-*d*<sub>6</sub>) δ: 154.6, 148.8, 148.2, 147.1, 140.5, 135.5, 135.1, 125.2 (2×C), 123.5, 117.0 (2×C), 40.6. **HRMS** (ESI) *m/z* calculated for C<sub>13</sub>H<sub>13</sub>O<sub>3</sub>N<sub>4</sub><sup>+</sup> [M+H]<sup>+</sup> 273.0982, found 273.0976.

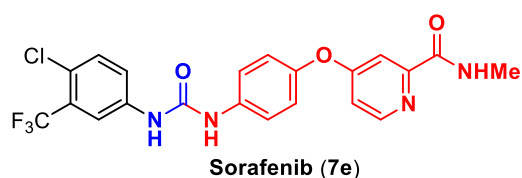

**7e.** 78 mg, 84% yield (PhCF<sub>3</sub>); 80 mg, 86% yield (CCl<sub>4</sub>); yellowish solid. **<sup>1</sup>H NMR** (400 MHz, DMSO-*d*<sub>6</sub>) δ: 9.22 (s, 1H), 9.01 (s, 1H), 8.79 (q, *J* = 4.8 Hz, 1H), 8.49 (d, *J* = 5.6 Hz, 1H), 8.12 (d, *J* = 2.4 Hz, 1H), 7.67-7.59 (m, 2H), 7.60 (d, *J* = 9.2 Hz, 2H), 7.38 (d, *J* = 2.4 Hz, 1H), 7.17 (d, *J* = 9.2 Hz, 2H), 7.14 (dd, *J* = 5.6, 2.8 Hz, 1H), 2.78 (d, *J* = 4.8 Hz, 3H). **<sup>13</sup>C NMR** (100 MHz, DMSO-*d*<sub>6</sub>) δ: 166.0, 163.9, 125.5, 125.4, 150.4, 147.9, 139.4, 137.1, 132.0, 126.8 (q, *J* = 30 Hz), 123.1, 122.9 (q, *J* = 273 Hz), 122.4, 121.5 (2×C), 120.6 (2×C), 116.8 (q, *J* = 5.7 Hz), 114.1, 108.7, 26.1. **<sup>19</sup>F NMR** (376 MHz, DMSO-*d*<sub>6</sub>) δ: -61.5 (3×F). **HRMS** (ESI) *m/z* calculated for C<sub>21</sub>H<sub>17</sub>O<sub>3</sub>N<sub>4</sub>F<sub>3</sub>Cl<sup>+</sup> [M+H]<sup>+</sup> 465.0936, found 465.0929.



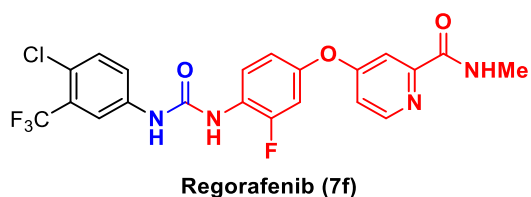

**7f.** 82 mg, 85% yield (PhCF<sub>3</sub>); 85 mg, 88% yield (CCl<sub>4</sub>); yellowish solid. **<sup>1</sup>H NMR** (400 MHz, DMSO-*d*<sub>6</sub>) δ: 9.53 (s, 1H), 8.81 (q, *J* = 4.8 Hz, 1H), 8.75 (d, *J* = 2.0 Hz, 1H), 8.52 (d, *J* = 5.6 Hz, 1H), 8.16 (t, *J* = 9.2 Hz, 1H), 8.12 (s, 1H), 7.62 (s, 2H), 7.41 (d, *J* = 2.4 Hz, 1H), 7.34 (dd, *J* = 11.6, 2.8 Hz, 1H), 7.18 (dd, *J* = 5.6, 2.8 Hz, 1H), 7.07 (ddd, *J* = 9.2, 2.8, 1.2 Hz, 1H), 2.79 (d, *J* = 4.8 Hz, 3H). **<sup>13</sup>C NMR** (100 MHz, DMSO-*d*<sub>6</sub>) δ: 165.5, 163.8, 152.8 (d, *J* = 244 Hz), 152.6, 152.2, 150.5, 148.1 (d, *J* = 10.3 Hz), 139.0, 132.2, 126.8 (q, *J* = 30 Hz), 125.0 (d, *J* = 10.8 Hz), 123.0, 122.8 (q, *J* = 271 Hz), 122.6 (d, *J* = 2.3 Hz), 122.5 (d, *J* = 2.2 Hz), 117.2 (d, *J* = 2.9 Hz), 116.6 (q, *J* = 5.6 Hz), 114.2, 109.2 (d, *J* = 22 Hz), 108.9, 26.1. **<sup>19</sup>F NMR** (376 MHz, DMSO-*d*<sub>6</sub>) δ: -61.6 (3×F), -124.6. **HRMS** (ESI) *m/z* calculated for C<sub>21</sub>H<sub>16</sub>O<sub>3</sub>N<sub>4</sub>F<sub>4</sub>Cl<sup>+</sup> [M+H]<sup>+</sup> 483.0842, found 483.0843.

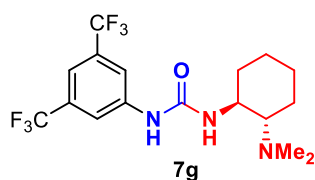

**7g.** 64 mg, 80% yield (PhCF<sub>3</sub>); 62 mg, 78% yield (CCl<sub>4</sub>); white solid. [α]<sub>D</sub><sup>25</sup> = +33.5 (c 0.93, CHCl<sub>3</sub>). **<sup>1</sup>H NMR** (400 MHz, CDCl<sub>3</sub>) δ: 8.48 (br, 1H), 7.84 (s, 2H), 7.37 (s, 1H), 5.95 (br, 1H), 3.69-3.61 (m, 1H), 3.56-3.51 (m, 1H), 2.50 (td, *J* = 10.8, 2.8 Hz, 1H), 2.40 (s, 6H), 2.30 (d, *J* = 10.8 Hz, 1H), 1.92 (d, *J* = 12.4 Hz, 1H), 1.86 (d, *J* = 12.4 Hz, 1H), 1.72 (d, *J* = 12.4 Hz, 1H), 1.27-1.16 (m, 3H). **<sup>13</sup>C NMR** (100 MHz, CDCl<sub>3</sub>) δ: 155.5, 141.3, 132.0 (q, *J* = 33 Hz, 2×C), 123.4 (q, *J* = 271 Hz, 2×C), 118.2 (q, *J* = 3.3 Hz, 2×C), 115.3 (quint, *J* = 3.8 Hz), 67.4, 51.2, 40.0 (2×C), 33.9, 24.9, 24.8, 21.9. **<sup>19</sup>F NMR** (376 MHz, CDCl<sub>3</sub>) δ: -63.1 (6×F). **HRMS** (ESI) *m/z* calculated for C<sub>17</sub>H<sub>22</sub>ON<sub>3</sub>F<sub>6</sub><sup>+</sup> [M+H]<sup>+</sup> 398.1662, found 398.1666.

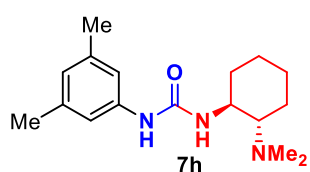

**7h.** 48 mg, 83% yield (PhCF<sub>3</sub>); 49 mg, 85% yield (CCl<sub>4</sub>); yellowish oil. [α]<sub>D</sub><sup>25</sup> = +51.9 (c 1.02, CHCl<sub>3</sub>)<sup>3</sup>. **<sup>1</sup>H NMR** (400 MHz, CDCl<sub>3</sub>) δ: 7.52 (s, 1H), 6.98 (s, 2H), 6.64 (s, 1H), 6.01 (d, *J* = 5.6 Hz, 1H), 3.60 (s, 1H), 3.56-3.48 (m, 1H), 2.39-2.30 (m, 2H), 2.27 (s, 6H), 2.24 (s, 6H), 1.83-1.77 (m, 2H), 1.67-1.63 (m, 1H), 1.20-1.06 (m, 3H). **<sup>13</sup>C NMR** (100 MHz, CDCl<sub>3</sub>) δ: 156.6, 139.3, 138.7 (2×C), 124.7, 118.0 (2×C), 66.8, 51.4, 39.9 (2×C), 34.0, 25.1, 24.8, 21.6, 21.5 (2×C). **HRMS** (ESI) *m/z* calculated for C<sub>17</sub>H<sub>28</sub>ON<sub>3</sub><sup>+</sup> [M+H]<sup>+</sup> 290.2227, found 290.2232.

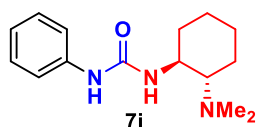

**7i.** 42 mg, 81% yield (PhCF<sub>3</sub>); 42 mg, 81% yield (CCl<sub>4</sub>); white solid. [α]<sub>D</sub><sup>25</sup> = +58.3 (c 0.65, CHCl<sub>3</sub>). **<sup>1</sup>H NMR** (400 MHz, CDCl<sub>3</sub>) δ: 7.54 (br, 1H), 7.35-7.32 (m, 2H), 7.29-7.24 (m, 2H), 7.04-6.99 (m, 1H), 5.79 (br, 1H), 3.54-3.46 (m, 1H), 3.73-3.68 (m, 1H), 2.45-2.41 (m, 1H), 2.29 (dd,

$J = 10.8, 3.2$  Hz, 1H), 2.25 (s, 6H), 1.87-1.79 (m, 2H), 1.70-1.66 (m, 1H), 1.36-1.25 (m, 1H), 1.23-1.07 (m, 2H).  $^{13}\text{C NMR}$  (100 MHz,  $\text{CDCl}_3$ )  $\delta$ : 156.7, 139.5, 129.1 (2 $\times$ C), 123.0, 120.3 (2 $\times$ C), 66.9, 51.8, 40.1 (2 $\times$ C), 34.0, 25.3, 24.8, 21.6. **HRMS** (ESI)  $m/z$  calculated for  $\text{C}_{15}\text{H}_{24}\text{ON}_3^+$   $[\text{M}+\text{H}]^+$  262.1914, found 262.1914.

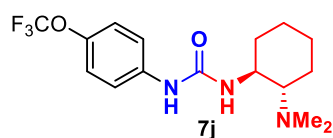

**7j.** 59.5 mg, 86% yield ( $\text{PhCF}_3$ ); 61 mg, 88% yield ( $\text{CCl}_4$ ); white solid. m.p. = 90-92 °C.  $[\alpha]_{\text{D}}^{25} = +29.8$  (c 0.65,  $\text{CHCl}_3$ ).

$^1\text{H NMR}$  (400 MHz,  $\text{CDCl}_3$ )  $\delta$ : 7.68 (br, 1H), 7.34 (d,  $J = 8.8$  Hz, 2H), 7.07 (d,  $J = 8.8$  Hz, 2H), 5.68 (br, 1H), 3.54-3.46 (m, 1H), 2.78-2.75 (m, 1H), 2.38-2.34 (m, 1H), 2.30 (dd,  $J = 11.2, 3.2$  Hz, 1H), 2.27 (s, 6H), 1.88-1.79 (m, 2H), 1.70-1.66 (m, 1H), 1.32-1.07 (m, 3H).  $^{13}\text{C NMR}$  (100 MHz,  $\text{CDCl}_3$ )  $\delta$ : 156.3, 144.2 (q,  $J = 2.0$  Hz), 138.3, 121.8 (2 $\times$ C), 120.6 (q,  $J = 255$  Hz), 120.5 (2 $\times$ C), 67.3, 51.7, 40.2 (2 $\times$ C), 34.0, 25.2, 24.8, 21.6.  $^{19}\text{F NMR}$  (376 MHz,  $\text{CDCl}_3$ )  $\delta$ : -58.2 (3 $\times$ F). **HRMS** (ESI)  $m/z$  calculated for  $\text{C}_{16}\text{H}_{23}\text{O}_2\text{N}_3\text{F}_3^+$   $[\text{M}+\text{H}]^+$  346.1737, found 346.1731.

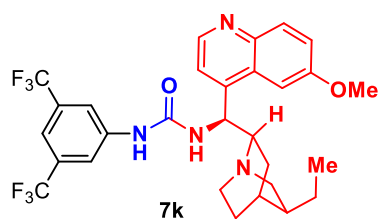

**7k.** 93 mg, 80% yield ( $\text{PhCF}_3$ ); 89 mg, 77% yield ( $\text{CCl}_4$ );

white solid.  $[\alpha]_{\text{D}}^{25} = -21.6$  (c 0.36,  $\text{CHCl}_3$ ).  $^1\text{H NMR}$  (400

MHz,  $\text{CDCl}_3$ )  $\delta$ : 9.43 (br, 1H), 8.79 (d,  $J = 4.8$  Hz, 1H), 8.01 (d,  $J = 9.2$  Hz, 1H), 7.84 (s, 2H), 7.72 (s, 1H), 7.49 (d,  $J = 4.8$  Hz, 1H), 7.38 (dd,  $J = 9.2, 2.8$  Hz, 1H), 7.29

(s, 1H), 5.91 (br, 1H), 4.18-4.08 (m, 2H), 3.98 (s, 3H), 3.65 (dd,  $J = 13.2, 10.4$  Hz, 1H), 3.18-3.10 (m, 1H), 2.83 (dd,  $J = 12.0, 7.2$  Hz, 1H), 2.14-2.04 (m, 1H), 1.96 (s, 2H), 1.92-1.85 (m, 2H), 1.38-1.31 (m, 2H), 1.26 (d,  $J = 12.4$  Hz, 1H), 1.19-1.15 (m, 1H), 0.85 (t,  $J = 7.2$  Hz, 3H).  $^{13}\text{C NMR}$  (100 MHz,  $\text{CDCl}_3$ )  $\delta$ : 158.8, 154.8, 147.7, 145.0, 142.4, 141.1, 131.9, 131.7 (q,  $J = 33$  Hz, 2 $\times$ C), 128.2, 123.3 (q,  $J = 271$  Hz, 2 $\times$ C), 122.7, 117.7 (2 $\times$ C), 116.0, 115.2, 101.7, 59.6, 56.7, 56.0, 41.5, 35.4, 29.7, 26.5, 25.8, 25.0, 24.7, 11.6.  $^{19}\text{F NMR}$  (376 MHz,  $\text{CDCl}_3$ )  $\delta$ : -58.3 (6 $\times$ F). **HRMS** (ESI)  $m/z$  calculated for  $\text{C}_{29}\text{H}_{31}\text{O}_2\text{N}_4\text{F}_6^+$   $[\text{M}+\text{H}]^+$  581.2346, found 581.2351.

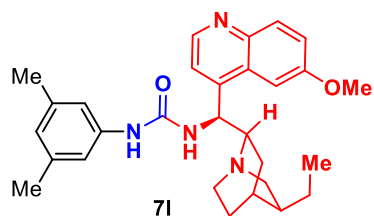

**7l.** 76 mg, 80% yield ( $\text{PhCF}_3$ ); 74 mg, 78% yield ( $\text{CCl}_4$ );

white solid.  $[\alpha]_{\text{D}}^{25} = +8.4$  (c 0.5,  $\text{CHCl}_3$ ).  $^1\text{H NMR}$  (400

MHz,  $\text{CDCl}_3$ )  $\delta$ : 8.76 (d,  $J = 4.8$  Hz, 1H), 8.54 (br, 1H), 7.97 (d,  $J = 9.2$  Hz, 1H), 7.74 (d,  $J = 2.4$  Hz, 1H), 7.59 (d,  $J = 4.8$  Hz, 1H), 7.34 (dd,  $J = 9.2, 2.4$  Hz, 1H), 7.08

(s, 2H), 6.55 (s, 1H), 5.87 (br, 1H), 4.22-4.16 (m, 1H), 4.11-4.05 (m, 1H), 4.00 (s, 3H), 3.59 (dd,  $J = 13.2, 10.4$  Hz, 1H), 3.19-3.11 (m, 1H), 2.75 (dd,  $J = 11.6, 6.8$  Hz, 1H), 2.18 (s, 6H), 2.02-1.95 (m, 1H), 1.84 (s, 2H), 1.81-1.64 (m, 2H), 1.27-1.19 (m, 3H), 1.11-1.07 (m, 1H), 0.77 (t,  $J = 7.2$  Hz, 3H).  $^{13}\text{C NMR}$  (100 MHz,  $\text{CDCl}_3$ )  $\delta$ : 158.7, 155.4,

147.8, 144.8, 142.2, 139.4, 138.4 (2xC), 131.7, 128.1, 124.3, 122.5, 119.7, 116.5 (2xC), 101.7, 59.8, 56.1, 56.0, 50.5, 41.7, 34.8, 29.7, 25.9, 25.0, 24.4, 21.5 (2xC), 11.5. **HRMS** (ESI)  $m/z$  calculated for  $C_{29}H_{37}O_2N_4^+ [M+H]^+$  473.2911, found 473.2911.

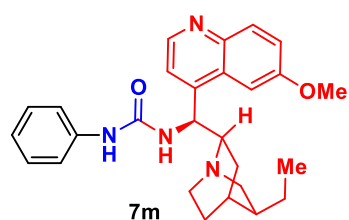

**7m.** 73 mg, 82% yield ( $PhCF_3$ ); 70 mg, 79% yield ( $CCl_4$ ); white solid.  $[\alpha]_D^{25} = +12.4$  (c 0.5,  $CHCl_3$ ).  **$^1H$  NMR** (400 MHz,  $CDCl_3$ )  $\delta$ : 8.75 (d,  $J = 4.8$  Hz, 1H), 8.52 (br, 1H), 7.98 (d,  $J = 9.2$  Hz, 1H), 7.75 (d,  $J = 2.0$  Hz, 1H), 7.54 (d,  $J = 4.8$  Hz, 1H), 7.41 (d,  $J = 8.0$  Hz, 2H), 7.35 (dd,  $J = 9.2, 2.4$  Hz,

1H), 7.16 (t,  $J = 7.6$  Hz, 2H), 6.91 (t,  $J = 7.6$  Hz, 1H), 5.88 (br, 1H), 4.25-4.19 (m, 1H), 4.13-4.07 (m, 1H), 3.98 (s, 3H), 3.57 (d,  $J = 12.4, 10.8$  Hz, 1H), 3.19-3.11 (m, 1H), 2.82 (dd,  $J = 11.6, 6.8$  Hz, 1H), 2.03-1.96 (m, 1H), 1.86 (s, 2H), 1.81-1.70 (m, 2H), 1.24-1.18 (m, 3H), 1.12-1.08 (m, 1H), 0.79 (t,  $J = 7.2$  Hz, 3H).  **$^{13}C$  NMR** (100 MHz,  $CDCl_3$ )  $\delta$ : 158.8, 155.4, 147.8, 144.9, 142.0, 139.5, 131.8, 128.9 (2xC), 128.2, 122.6, 122.5, 119.7, 119.0 (2xC), 101.7, 59.7, 56.1 (2xC), 41.8, 34.8, 29.8, 26.0, 24.9, 24.5, 24.4, 11.6. **HRMS** (ESI)  $m/z$  calculated for  $C_{27}H_{33}O_2N_4^+ [M+H]^+$  445.2598, found 445.2592.

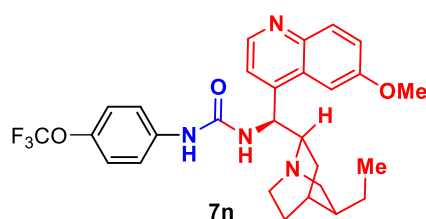

**7n.** 82.5 mg, 78% yield ( $PhCF_3$ ); 84.5 mg, 80% yield ( $CCl_4$ ); white solid. m.p. = 168-170 °C.  $[\alpha]_D^{25} = +3.8$  (c 0.5,  $CHCl_3$ ).  **$^1H$  NMR** (400 MHz,  $CDCl_3$ )  $\delta$ : 8.82 (d,  $J = 4.8$  Hz, 1H), 8.77 (br, 1H), 7.89 (d,  $J = 9.2$  Hz, 1H), 7.70 (s, 1H), 7.69 (s, 1H), 7.35 (d,  $J =$

8.8 Hz, 2H), 7.28 (dd,  $J = 9.2, 2.4$  Hz, 1H), 6.89 (d,  $J = 8.8$  Hz, 2H), 5.85 (br, 1H), 4.54-4.48 (m, 1H), 4.21-4.15 (m, 1H), 3.94 (s, 3H), 3.56 (dd,  $J = 12.8, 10.4$  Hz, 1H), 3.17-3.09 (m, 1H), 3.01 (dd,  $J = 12.0, 7.6$  Hz, 1H), 2.00-1.93 (m, 1H), 1.86-1.68 (m, 4H), 1.32-1.15 (m, 3H), 1.01-0.97 (m, 1H), 0.70 (t,  $J = 7.2$  Hz, 3H).  **$^{13}C$  NMR** (100 MHz,  $CDCl_3$ )  $\delta$ : 158.8, 155.3, 148.0, 144.5, 143.9, 141.9, 138.2, 131.4, 128.2, 122.8, 121.5 (2xC), 120.5 (q,  $J = 255$  Hz), 119.8, 119.7 (2xC), 101.6, 59.5, 56.1, 56.0, 49.6, 41.8, 35.0, 25.9, 25.0, 24.7, 24.6, 11.5.  **$^{19}F$  NMR** (376 MHz,  $CDCl_3$ )  $\delta$ : -63.0 (3xF). **HRMS** (ESI)  $m/z$  calculated for  $C_{28}H_{32}O_3N_4F_3^+ [M+H]^+$  529.2421, found 529.2426.

### Gram Scale Synthesis of Chiral Ligands 7i and 7j

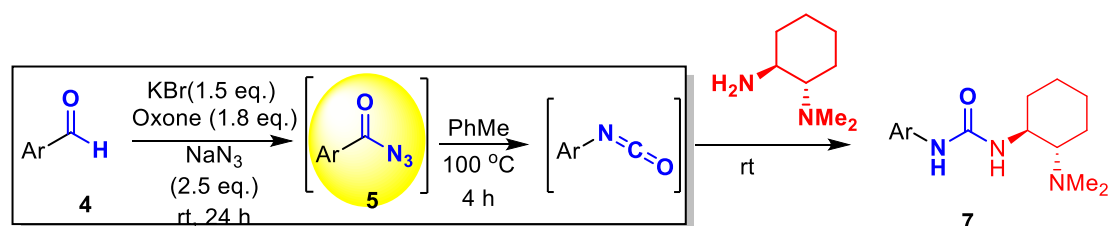

Gram-Scale

To a stirred solution of aromatic aldehyde substrate (6 mmol) in the PhCF<sub>3</sub> (analytical grade, 60 mL) at 0 °C were added KBr (1.06 g, 9 mmol) and Oxone (3.32 g, 10.8 mmol) and stirred for 5 min. Then sodium azide (975 mg, 15 mmol) was added. After the completion of the addition, the resulting mixture was stirred for 5 min before warmed to room temperature and stirred for an additional 36 h. When the aromatic aldehyde substrate was fully consumed as determined by TLC analysis, the mixture was filtered through a pad of celite. The filtrate was concentrated under reduced pressure and the residue was used for the next step without further purification. An oven-dried pressure tube under nitrogen atmosphere was charged with the residue and dry toluene (25 mL). The reaction mixture was heated to 100°C for 4 hours and then cooled to room temperature. The chiral amine (852 mg, 6 mmol) was dissolved in dry toluene (5 mL) and added dropwise into the pressure tube under a positive pressure of nitrogen flow. The resulting mixture was stirred at rt for 24 hours. The volatiles were removed under reduced pressure and the residue was purified by flash chromatography on silica gel using eluents (petroleum ether/ethyl acetate = 10/1) to provide the desired chiral ligand **7i** (1.17 g, 75% yield) and **7j** (1.66 g, 80%).

### Control Experiments

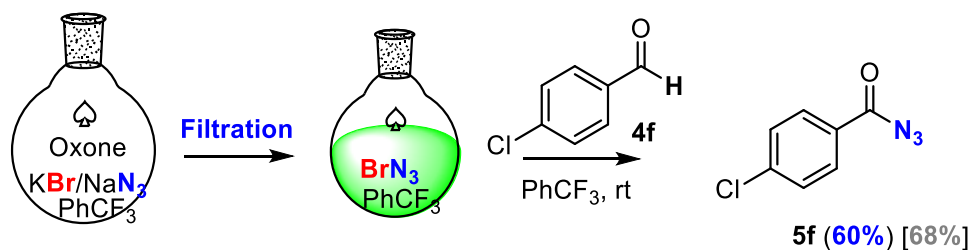

***In situ generation of BrN<sub>3</sub> from oxone-KBr-NaN<sub>3</sub>:*** Following our previous procedure<sup>2</sup>, a round bottom flask equipped with a stir bar was immersed in ice-water bath and charged with Oxone (666 mg, 2.16 mmol, 7.2 equiv.) and KBr (213 mg, 1.8 mmol, 6 equiv.). PhCF<sub>3</sub> (10 mL) or CCl<sub>4</sub> (10 mL) was added to the round bottom in one portion. The reaction mixture was stirred and kept at 0 °C and protected from light. After 5 minutes, sodium azide (195 mg, 3.0 mmol, 10 equiv. or 172 mg, 2.64 mmol, 8.8 equiv.) was added in one portion. After the completion of the addition, the resulting mixture was stirred for 5 min before warmed to room temperature and stirred for an additional 2 h. The mixture was filtered through a pad of celite and the filtrate was added to a round bottom flask. To the resulting solution *p*-chlorobenzaldehyde **4f** (43 mg, 0.3 mmol, 1 equiv.) was added. The solution was allowed to stir at rt until the starting material had been totally consumed (as monitored by TLC). Saturated aqueous

Na<sub>2</sub>SO<sub>3</sub> solution (10 mL) was added. The resulting mixture was extracted with CH<sub>2</sub>Cl<sub>2</sub> (3 × 10 mL). Organic layer was collected, then washed with brine, dried by anhydrous Na<sub>2</sub>SO<sub>4</sub> and filtered. The filtrate was concentrated under reduced pressure and the residue was purified by flash chromatography on silica gel using eluents (petroleum ether/ethyl acetate = 50/1) to provide the desired compound **5f** (32.5 mg, 60% yield or 37 mg, 68% yield) as a white solid.

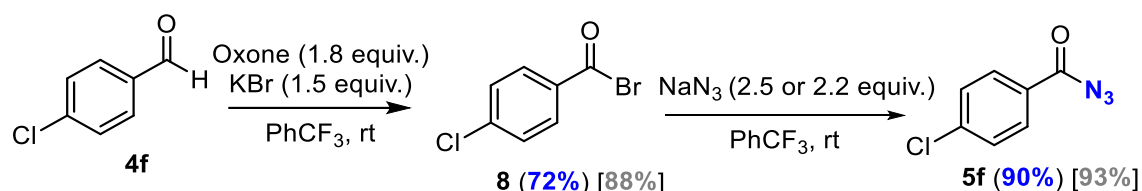

**Oxidation of aldehyde with Oxone-KBr:** To a stirred solution of aromatic aldehyde **4f** (42 mg, 0.3 mmol) in the PhCF<sub>3</sub> (analytical grade, 3.0 mL) or CCl<sub>4</sub> (analytical grade, 3.0 mL) at 0 °C were added KBr (54 mg, 0.45 mmol) and Oxone (166 mg, 0.54 mmol). After the completion of the addition, the resulting mixture was stirred for 5 min before warmed to room temperature and stirred for an additional 2 h. When the aromatic aldehyde **4f** was fully consumed as determined by TLC analysis, the mixture was filtered through a pad of celite. The filtrate was concentrated under reduced pressure to afford the benzoyl bromide **8** (47 mg, 72% yield or 58 mg, 88% yield) as a colorless oil. <sup>1</sup>H NMR (400 MHz, CDCl<sub>3</sub>) δ: 8.01 (d, *J* = 8.8 Hz, 2H), 7.51 (d, *J* = 8.8 Hz, 2H). <sup>13</sup>C NMR (100 MHz, CDCl<sub>3</sub>) δ: 162.3, 141.3, 131.3 (2×C), 129.5 (2×C), 123.9.

**Preparation of acyl azide from benzoyl bromide:** To a stirred solution of self-prepared benzoyl bromide **8** (55 mg, 0.25 mmol) in the PhCF<sub>3</sub> (analytical grade, 3.0 mL) or CCl<sub>4</sub> (analytical grade, 2.5 mL) at 0 °C were added sodium azide (41 mg, 0.625 mmol or 36 mg, 0.55 mmol). After the completion of the addition, the resulting mixture was stirred for 5 min before warmed to room temperature and stirred for an additional 24 h. The mixture was filtered through a pad of celite. The filtrate was concentrated under reduced pressure and the residue was purified by flash chromatography on silica gel using eluents (petroleum ether/ethyl acetate = 50/1) to provide the desired acyl azide **5f** (41 mg, 90% yield or 42 mg, 93% yield) as a white solid.

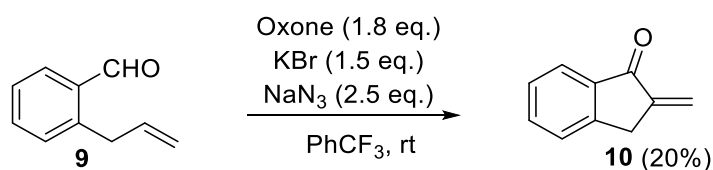

**Radical cyclization reaction:** To a stirred solution of aromatic aldehyde **9** (44 mg, 0.3 mmol) in the PhCF<sub>3</sub> (analytical grade, 3.0 mL) or CCl<sub>4</sub> (analytical grade, 3.0 mL) at 0 °C were added KBr (54 mg, 0.45 mmol) and Oxone (166 mg, 0.54 mmol) and stirred for 5 min. Then sodium azide (49 mg, 0.75 mmol or 43 mg, 0.66 mmol) was added. After the completion of the addition, the resulting mixture was stirred for 5 min before warmed to room temperature and stirred for an additional 24 h. When the substrate was fully consumed as determined by TLC analysis, the mixture was filtered through a pad of celite. The filtrate was concentrated under reduced pressure and the residue was purified by flash chromatography on silica gel using eluents (petroleum ether/ethyl acetate = 40/1) to provide the desired compound **10** (9 mg, 20% yield or 10 mg, 23% yield) as a colorless oil. **<sup>1</sup>H NMR** (400 MHz, CDCl<sub>3</sub>) δ: 7.86 (dd, *J* = 7.6, 0.4 Hz, 1H), 7.60 (td, *J* = 7.6, 1.2 Hz, 1H), 7.49 (dt, *J* = 7.6, 0.8 Hz, 1H), 7.42-7.38 (m, 1H), 6.36 (td, *J* = 2.4, 0.8 Hz, 1H), 5.64 (td, *J* = 2.0, 0.8 Hz, 1H), 3.75 (s, 2H). **<sup>13</sup>C NMR** (100 MHz, CDCl<sub>3</sub>) δ: 193.6, 150.0, 143.4, 138.3, 135.0, 127.7, 126.5, 124.7, 119.5, 31.9.

## **References**

1. Kumar, A.; Kumar, N.; Sharma, R.; Bhargava, G.; Mahajan, D. *J. Org. Chem.* **2019**, *84*, 11323-11334.
2. Ren, J.; Tong, R. *Org. Biomol. Chem.* **2013**, *11*, 4312.
3. Berkessel, A.; Mukherjee, S.; Müller, T. N.; Cleemann, F.; Roland, K.; Brandenburg, M.; Neudörfl, J.-M.; Lex, J. *Org. Biomol. Chem.* **2006**, *4*, 4319-4330.

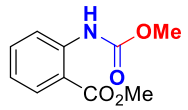

Urethylane anthranilate

<sup>1</sup>H NMR (400 MHz, CDCl<sub>3</sub>)

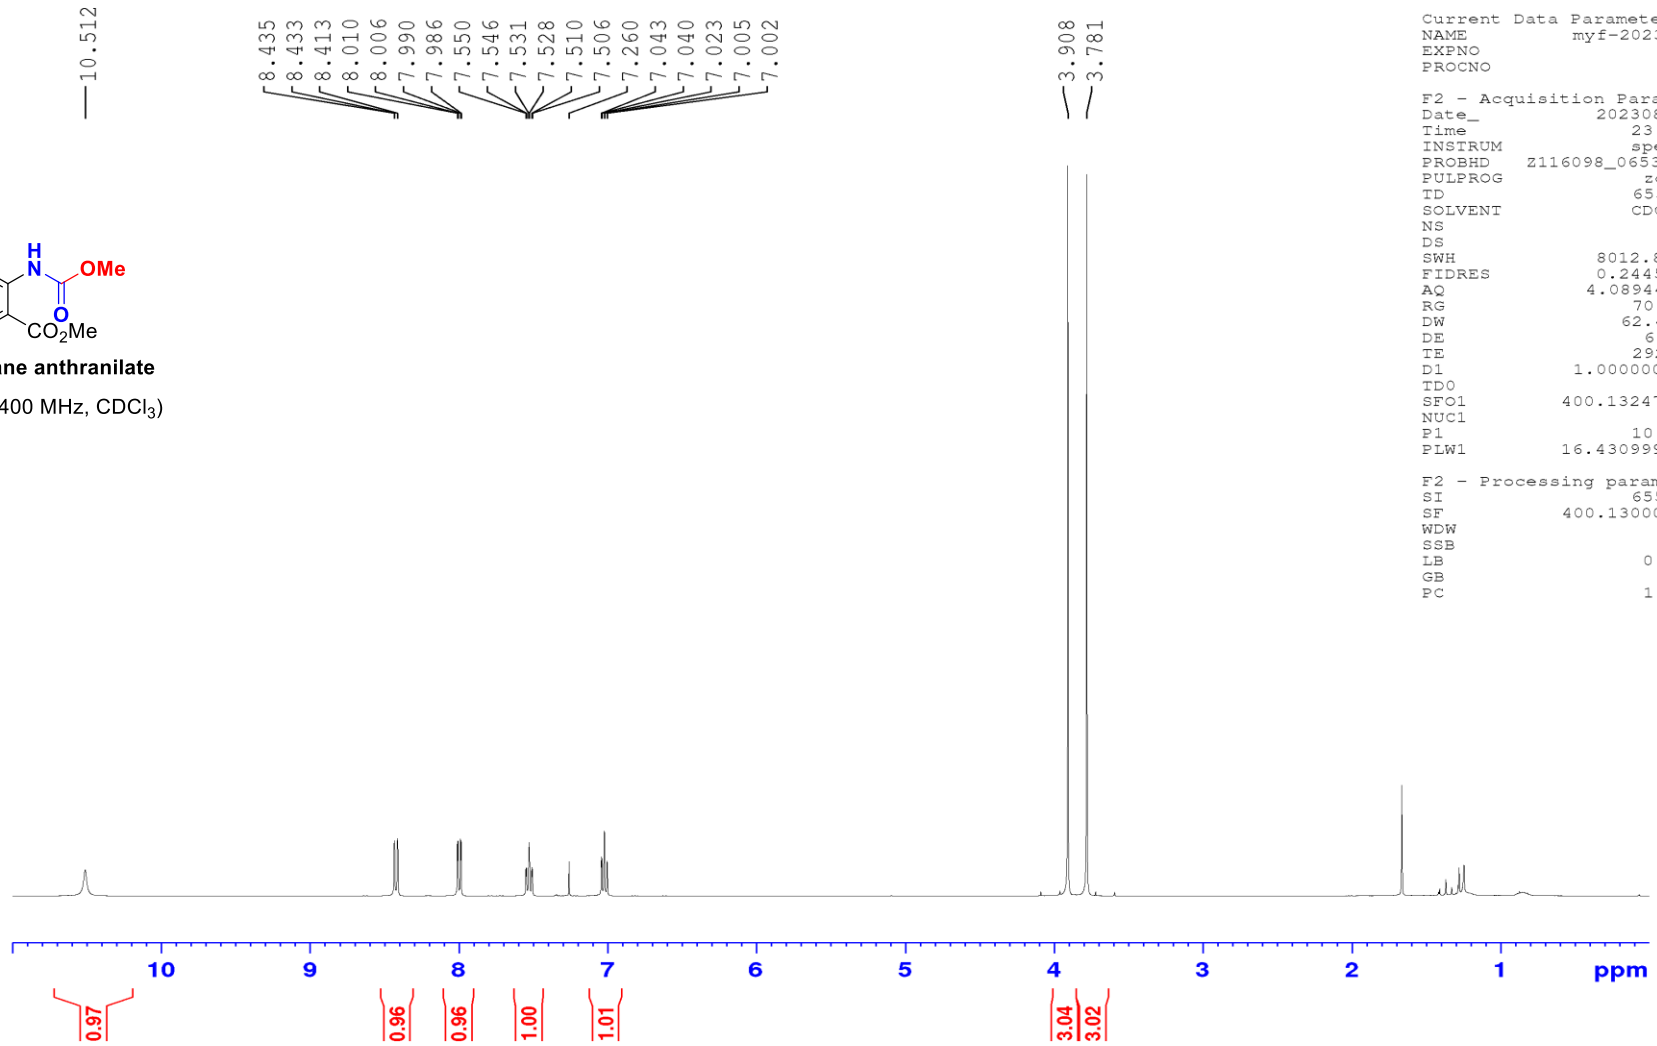

Current Data Parameters  
NAME myf-202308  
EXPNO 1  
PROCNO 1

F2 - Acquisition Parameters  
Date\_ 20230803  
Time 23.03 h  
INSTRUM spect  
PROBHD Z116098\_0653 (  
PULPROG zg30  
TD 65536  
SOLVENT CDCl3  
NS 16  
DS 2  
SWH 8012.820 Hz  
FIDRES 0.244532 Hz  
AQ 4.0894465 sec  
RG 70.89  
DW 62.400 usec  
DE 6.50 usec  
TE 292.4 K  
D1 1.00000000 sec  
TDO 1  
SFO1 400.1324708 MHz  
NUC1 1H  
P1 10.00 usec  
PLW1 16.43099976 W

F2 - Processing parameters  
SI 65536  
SF 400.1300097 MHz  
WDW EM  
SSB 0  
LB 0.30 Hz  
GB 0  
FC 1.00

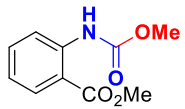

Urethylane anthranilate

<sup>13</sup>C NMR (100 MHz, CDCl<sub>3</sub>)

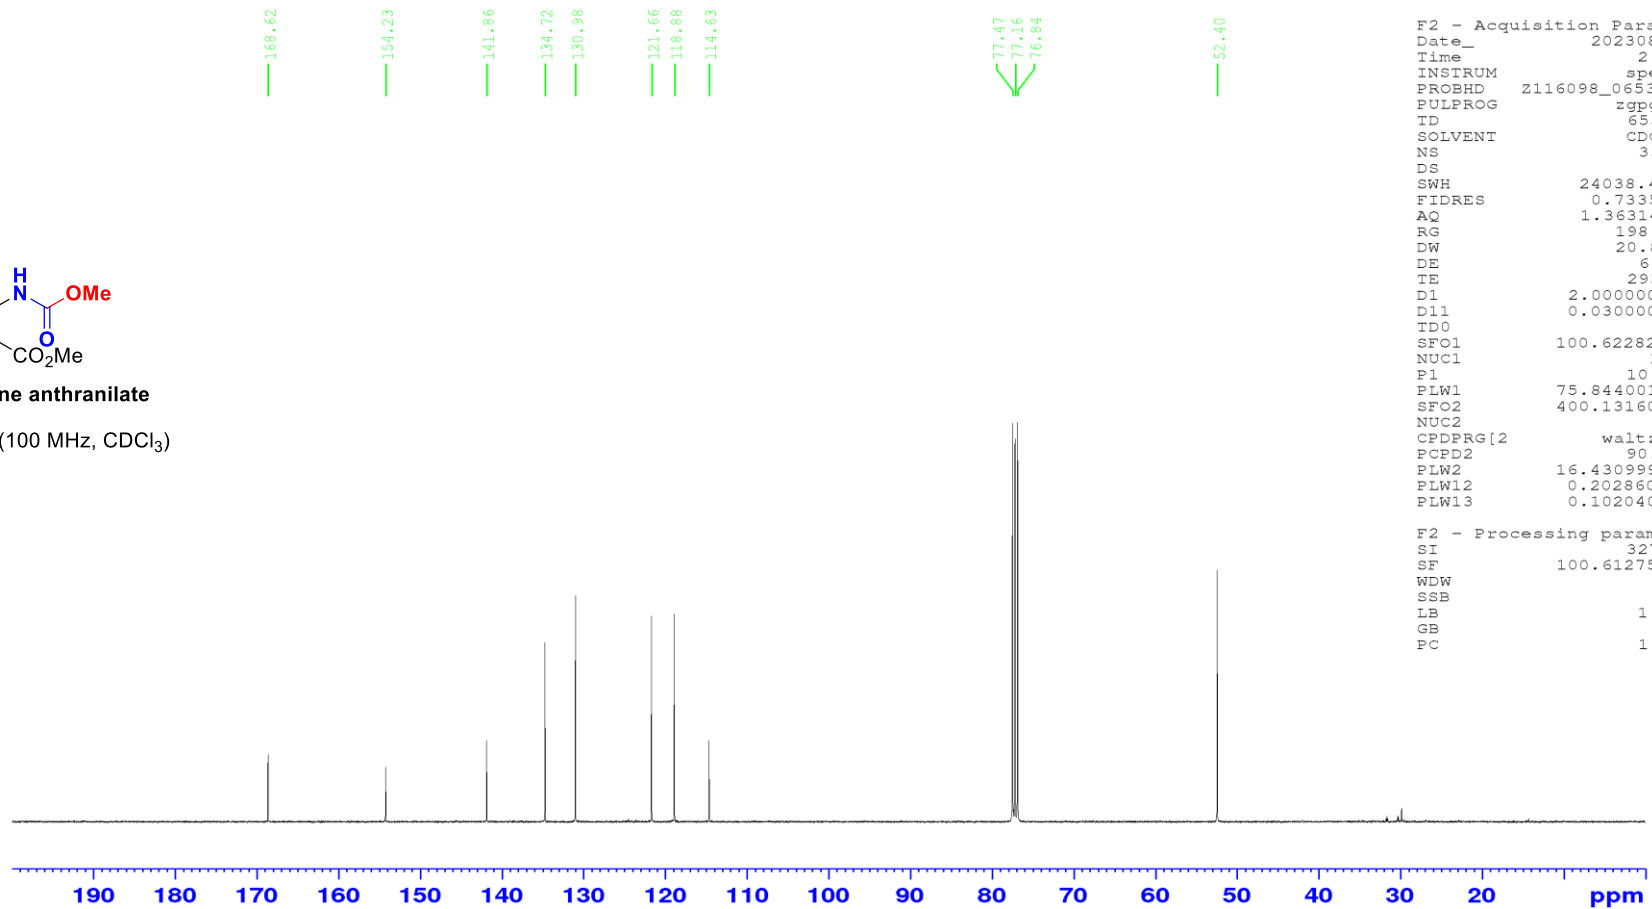

Current Data Parameters  
NAME myf-202308  
EXPNO 2  
PROCNO 1

F2 - Acquisition Parameters  
Date\_ 20230804  
Time 2.14 h  
INSTRUM spect  
PROBHD Z116098\_0653 (  
PULPROG zgpg30  
TD 65536  
SOLVENT CDCl3  
NS 3333  
DS 4  
SWH 24038.461 Hz  
FIDRES 0.733596 Hz  
AQ 1.3631488 sec  
RG 198.36  
DW 20.800 usec  
DE 6.50 usec  
TE 293.2 K  
D1 2.00000000 sec  
D11 0.03000000 sec  
TD0 1  
SFO1 100.6228298 MHz  
NUC1 13C  
P1 10.00 usec  
PLW1 75.84400177 W  
SFO2 400.1316005 MHz  
NUC2 1H  
CPDPRG[2] waltz16  
PCPD2 90.00 usec  
PLW2 16.43099976 W  
PLW12 0.20286000 W  
PLW13 0.10204000 W

F2 - Processing parameters  
SI 32768  
SF 100.6127582 MHz  
WDW EM  
SSB 0  
LB 1.00 Hz  
GB 0  
PC 1.40



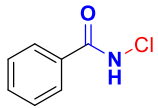

**N-chlorobenzamide (2a)**  
<sup>1</sup>H NMR (400 MHz, CDCl<sub>3</sub>)

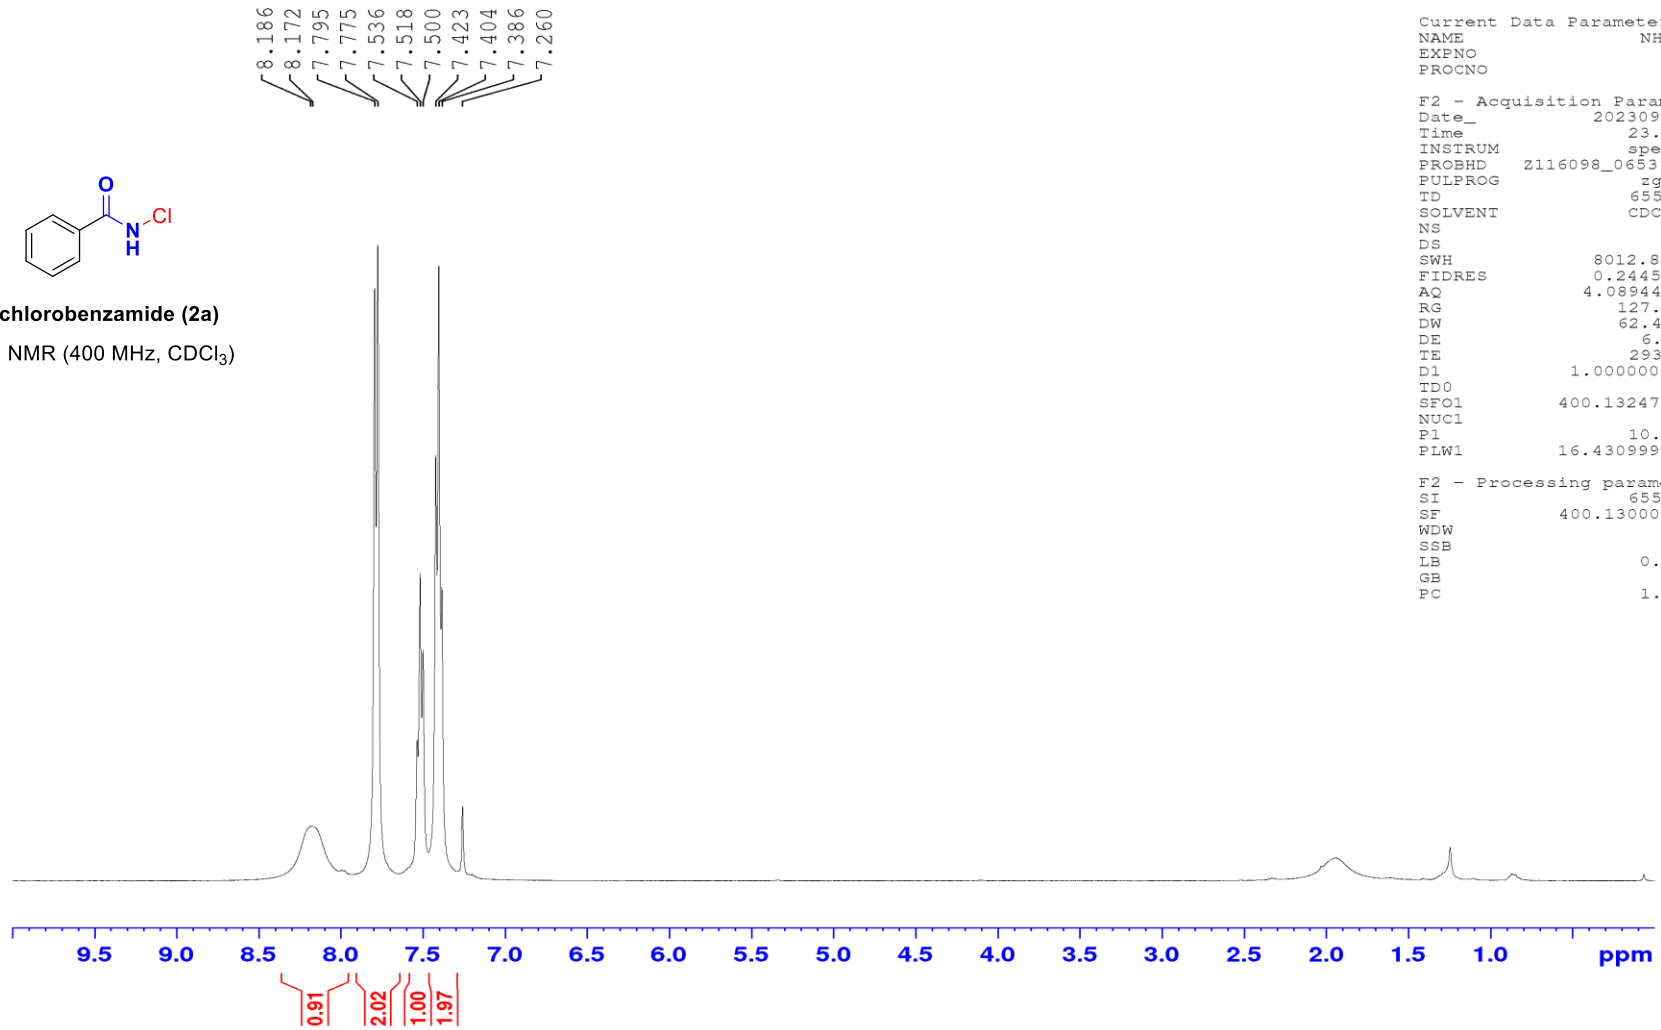

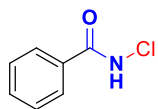

**N-chlorobenzamide (2a)**

<sup>13</sup>C NMR (100 MHz, CDCl<sub>3</sub>)

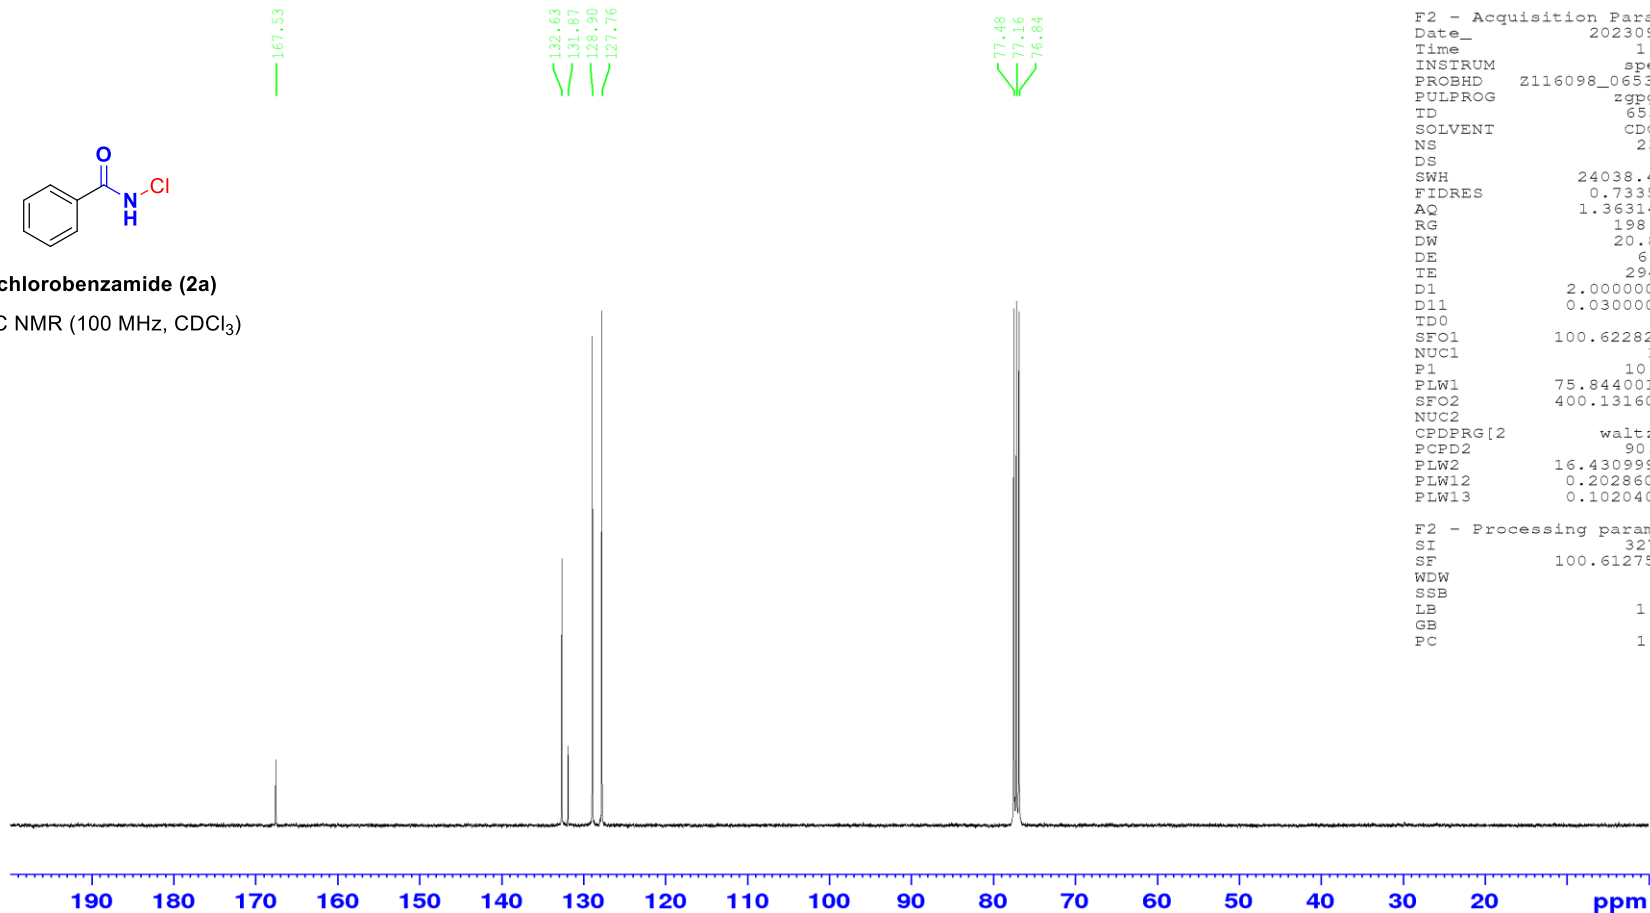

Current Data Parameters  
NAME NHCl  
EXPNO 2  
PROCNO 1

F2 - Acquisition Parameters  
Date\_ 20230927  
Time 1.47 h  
INSTRUM spect  
PROBHD Z116098\_0653 (  
PULPROG zgpg30  
TD 65536  
SOLVENT CDCl3  
NS 2333  
DS 4  
SWH 24038.461 Hz  
FIDRES 0.733596 Hz  
AQ 1.3631488 sec  
RG 198.36  
DW 20.800 usec  
DE 6.50 usec  
TE 294.4 K  
D1 2.00000000 sec  
D11 0.03000000 sec  
TD0 1  
SFO1 100.6228298 MHz  
NUC1 13C  
P1 10.00 usec  
PLW1 75.84400177 W  
SFO2 400.1316005 MHz  
NUC2 1H  
CPDPRG[2] waltz16  
PCPD2 90.00 usec  
PLW2 16.43099976 W  
PLW12 0.20286000 W  
PLW13 0.10204000 W

F2 - Processing parameters  
SI 32768  
SF 100.6127586 MHz  
WDW EM  
SSB 0  
LB 1.00 Hz  
GB 0  
PC 1.40

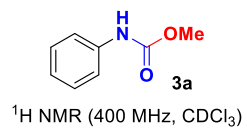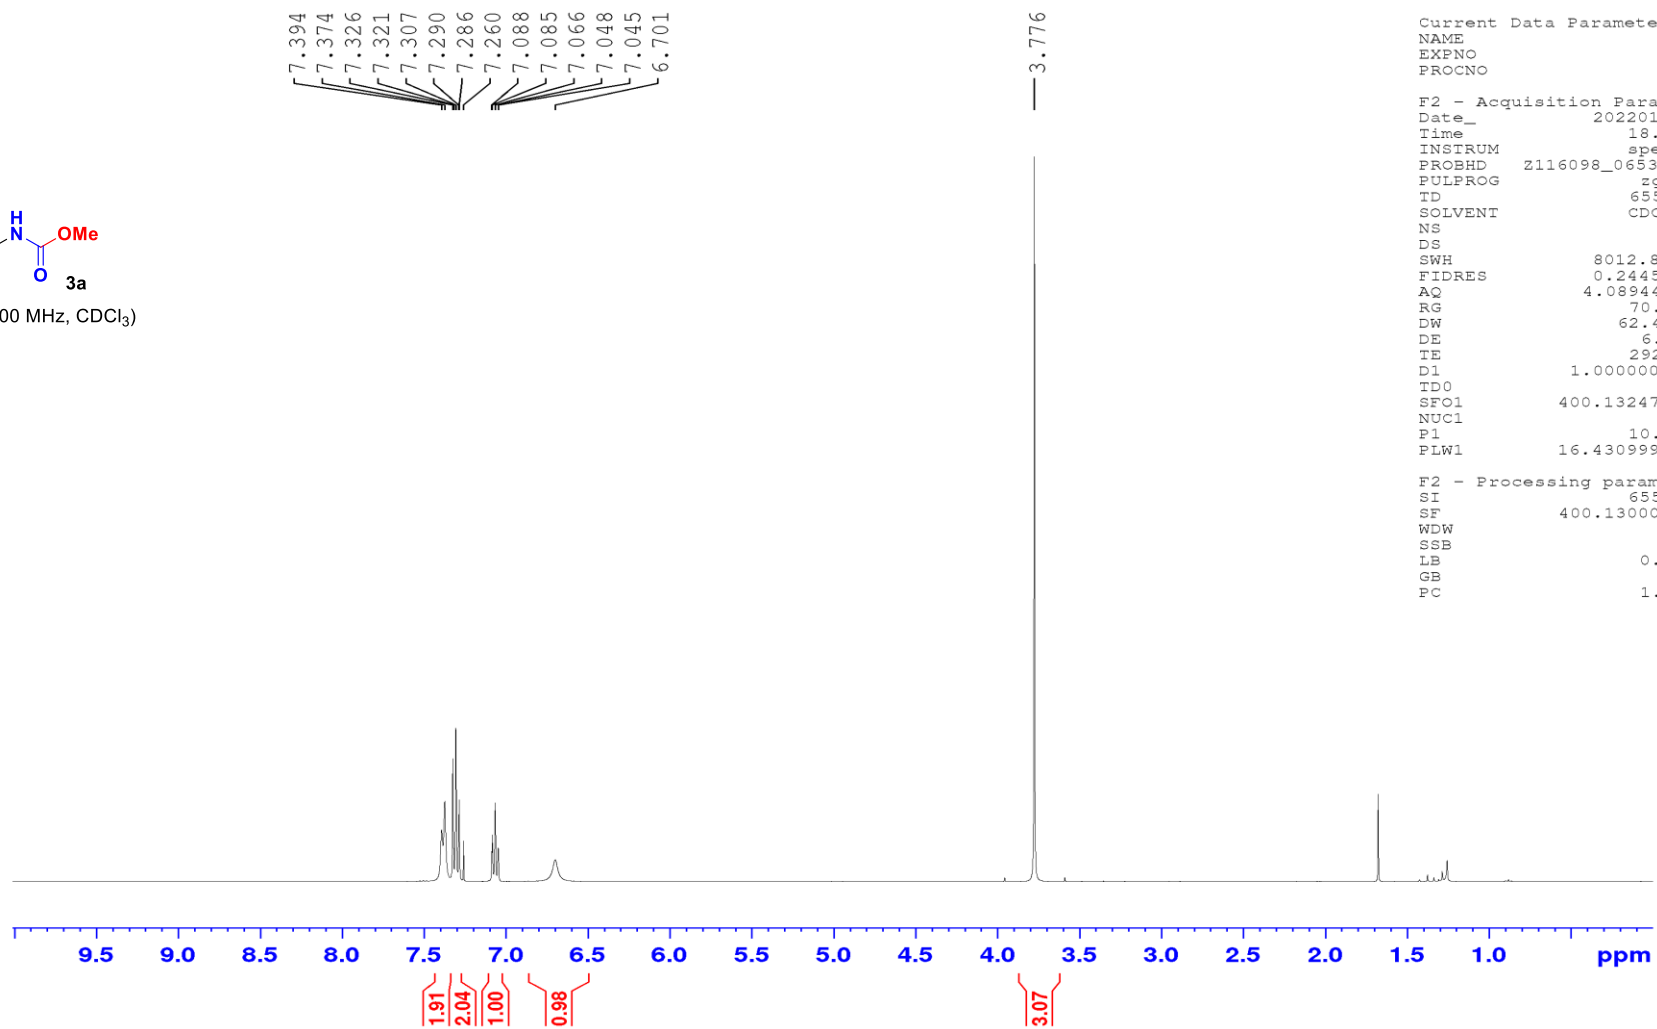

Current Data Parameters  
NAME s1  
EXPNO 1  
PROCNO 1

F2 - Acquisition Parameters  
Date\_ 20220111  
Time 18.04 h  
INSTRUM spect  
PROBHD Z116098\_0653 (  
PULPROG zg30  
TD 65536  
SOLVENT CDCl3  
NS 16  
DS 2  
SWH 8012.820 Hz  
FIDRES 0.244532 Hz  
AQ 4.0894465 sec  
RG 70.89  
DW 62.400 usec  
DE 6.50 usec  
TE 292.9 K  
D1 1.00000000 sec  
TD0 1  
SFO1 400.1324708 MHz  
NUC1 1H  
P1 10.00 usec  
PLW1 16.43099976 W

F2 - Processing parameters  
SI 65536  
SF 400.1300098 MHz  
WDW EM  
SSB 0  
LB 0.30 Hz  
GB 0  
PC 1.00

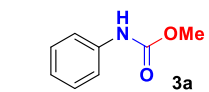

<sup>13</sup>C NMR (100 MHz, CDCl<sub>3</sub>)

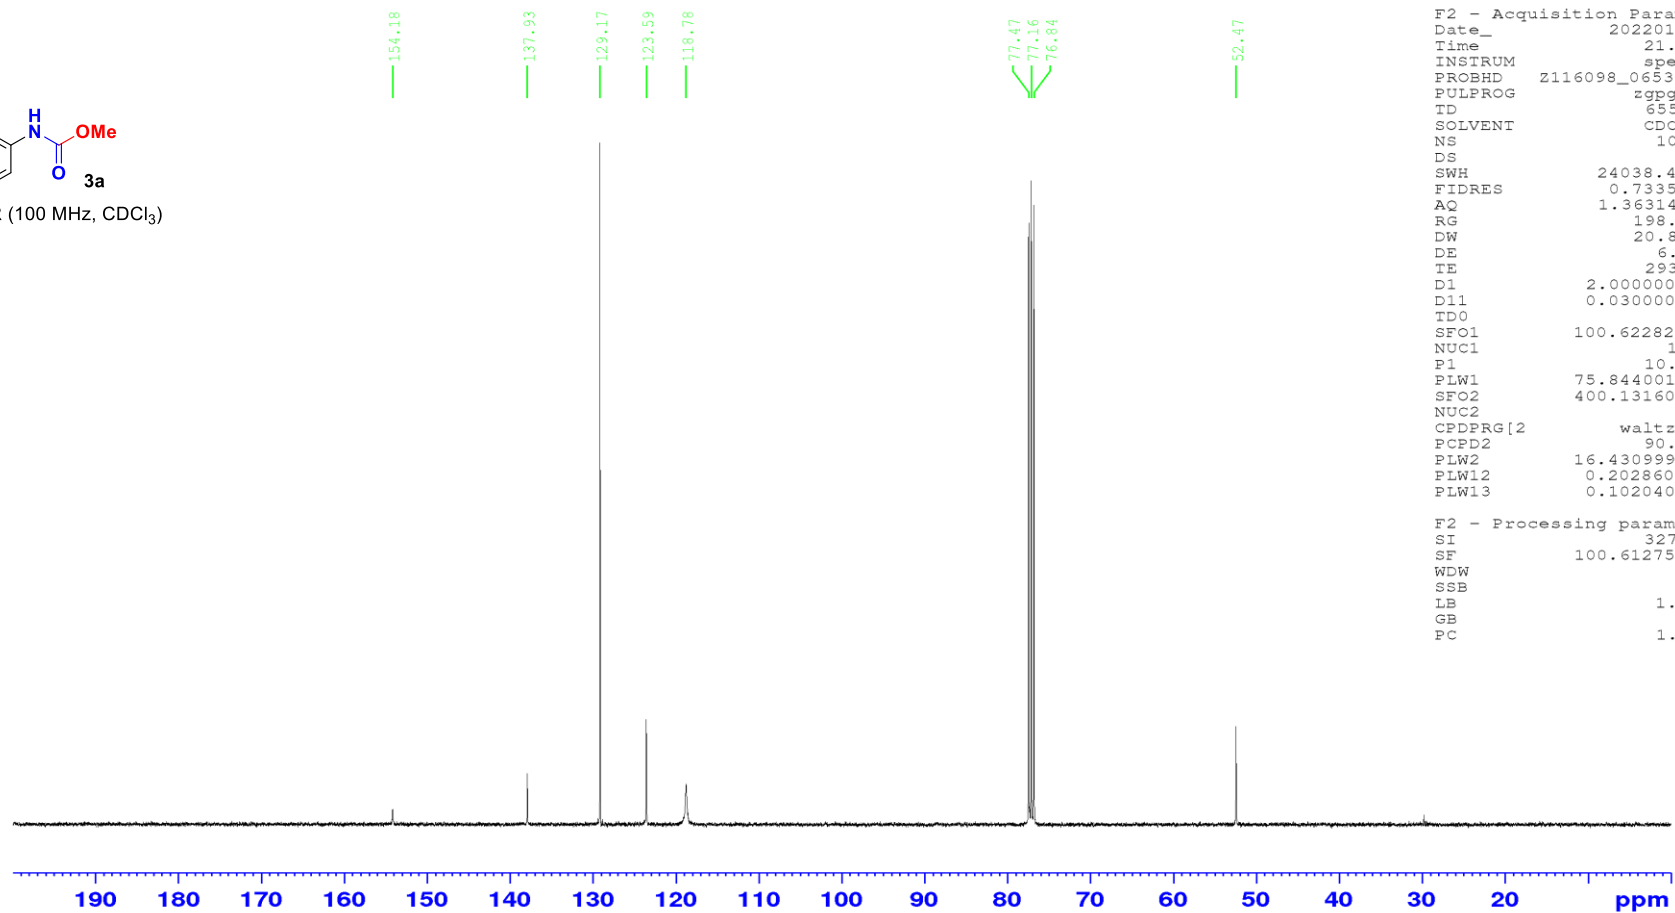

Current Data Parameters  
NAME S1  
EXPNO 2  
PROCNO 1

F2 - Acquisition Parameters  
Date\_ 20220111  
Time 21.25 h  
INSTRUM spect  
PROBHD Z116098\_0653 (  
PULPROG zgpg30  
TD 65536  
SOLVENT CDCl3  
NS 1024  
DS 4  
SWH 24038.461 Hz  
FIDRES 0.733596 Hz  
AQ 1.3631488 sec  
RG 198.36  
DW 20.800 usec  
DE 6.50 usec  
TE 293.6 K  
D1 2.00000000 sec  
D11 0.03000000 sec  
TD0 1  
SFO1 100.6228298 MHz  
NUC1 13C  
P1 10.00 usec  
PLW1 75.84400177 W  
SFO2 400.1316005 MHz  
NUC2 1H  
CPDPRG[2] waltz16  
PCPD2 90.00 usec  
PLW2 16.43099976 W  
PLW12 0.20286000 W  
PLW13 0.10204000 W

F2 - Processing parameters  
SI 32768  
SF 100.6127594 MHz  
WDW EM  
SSB 0  
LB 1.00 Hz  
GB 0  
PC 1.40

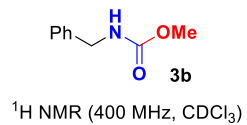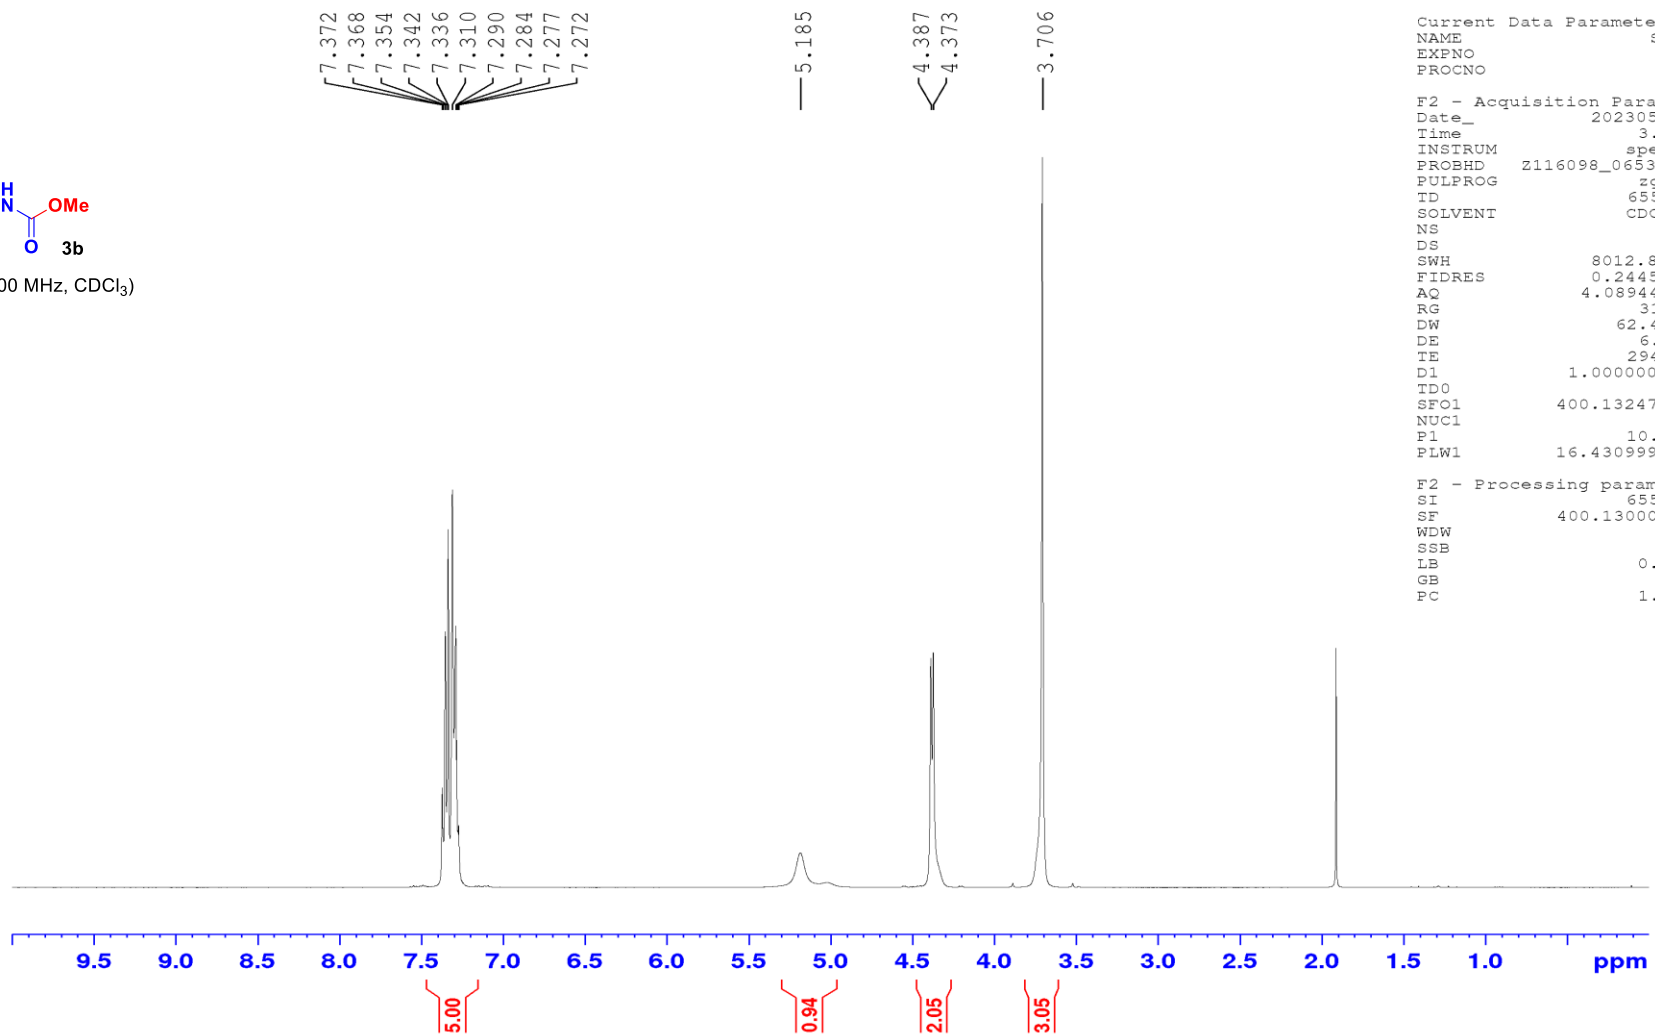

```

Current Data Parameters
NAME          S14
EXPNO         1
PROCNO        1

F2 - Acquisition Parameters
Date_         20230531
Time          3.49 h
INSTRUM       spect
PROBHD        Z116098_0653 (
PULPROG       zg30
TD            65536
SOLVENT       CDCl3
NS            16
DS            2
SWH           8012.820 Hz
FIDRES        0.244532 Hz
AQ            4.089465 sec
RG            31.9
DW            62.400 usec
DE            6.50 usec
TE            294.4 K
D1            1.00000000 sec
TD0           1
SFO1          400.1324708 MHz
NUC1          1H
F1            10.00 usec
PLW1          16.43099976 W

F2 - Processing parameters
SI            65536
SF            400.1300000 MHz
WDW           EM
SSB           0
LB            0.30 Hz
GB            0
FC            1.00
  
```

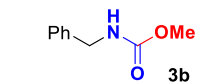

<sup>13</sup>C NMR (100 MHz, CDCl<sub>3</sub>)

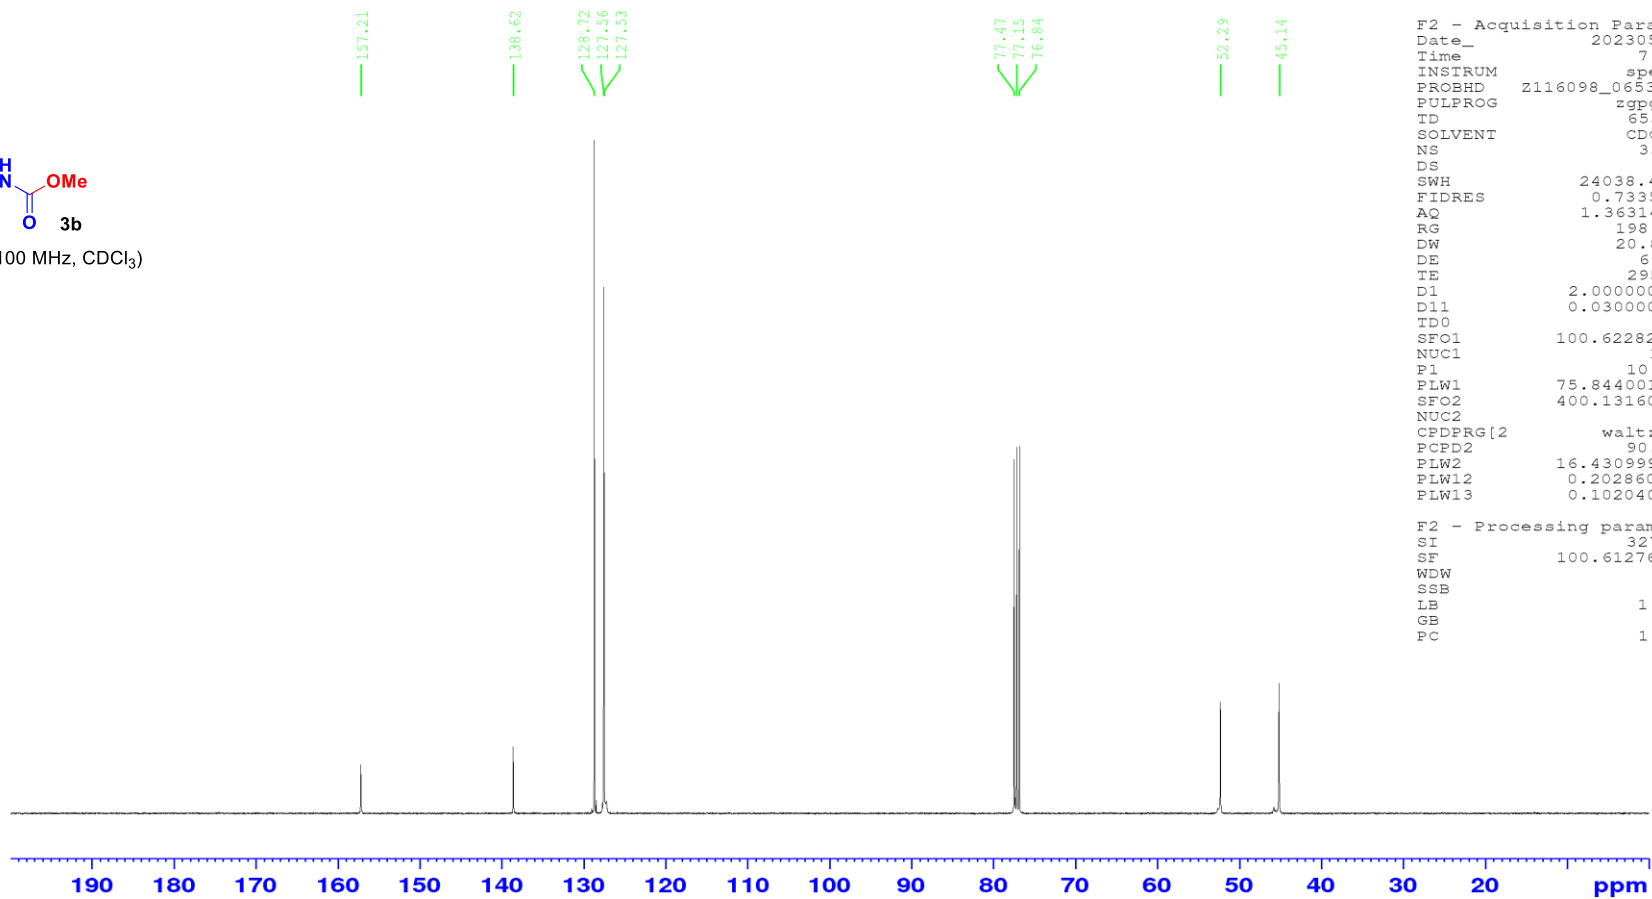

Current Data Parameters  
 NAME S14  
 EXPNO 2  
 PROCNO 1

F2 - Acquisition Parameters  
 Date\_ 20230531  
 Time 7.00 h  
 INSTRUM spect  
 PROBHD Z116098\_0653 (  
 PULPROG zgpg30  
 TD 65536  
 SOLVENT CDCl3  
 NS 3333  
 DS 4  
 SWH 24038.461 Hz  
 FIDRES 0.733596 Hz  
 AQ 1.3631488 sec  
 RG 198.36  
 DW 20.800 usec  
 DE 6.50 usec  
 TE 295.1 K  
 D1 2.00000000 sec  
 D11 0.03000000 sec  
 TD0 1  
 SFO1 100.6228298 MHz  
 NUC1 13C  
 P1 10.00 usec  
 PLW1 75.84400177 W  
 SFO2 400.1316005 MHz  
 NUC2 1H  
 CPDPRG[2] waltz16  
 PCPD2 90.00 usec  
 PLW2 16.43099976 W  
 PLW12 0.20286000 W  
 PLW13 0.10204000 W

F2 - Processing parameters  
 SI 32768  
 SF 100.6127638 MHz  
 WDW EM  
 SSB 0  
 LB 1.00 Hz  
 GB 0  
 FC 1.40

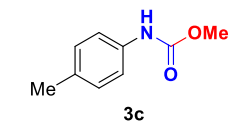

<sup>1</sup>H NMR (400 MHz, CDCl<sub>3</sub>)

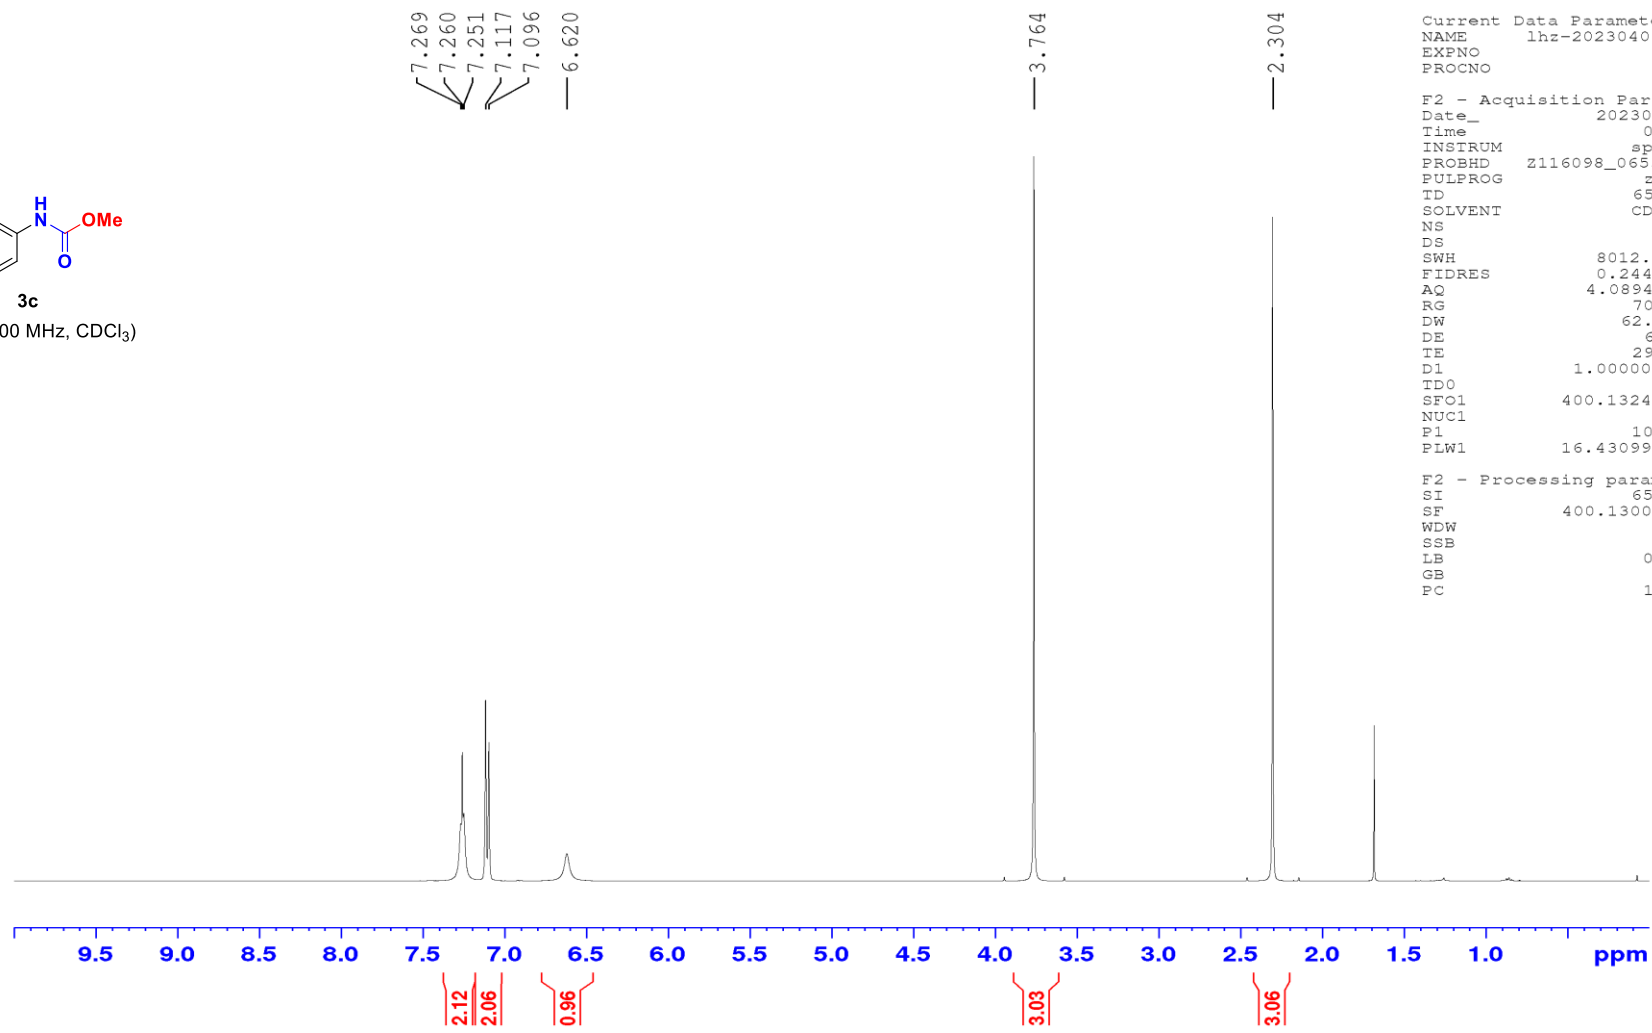

Current Data Parameters  
NAME 1hz-20230407-3  
EXPNO 1  
PROCNO 1

F2 - Acquisition Parameters  
Date\_ 20230408  
Time 0.43 h  
INSTRUM spect  
PROBHD Z116098\_0653 (  
PULPROG zg30  
TD 65536  
SOLVENT CDCl3  
NS 16  
DS 2  
SWH 8012.820 Hz  
FIDRES 0.244532 Hz  
AQ 4.0894465 sec  
RG 70.89  
DW 62.400 usec  
DE 6.50 usec  
TE 292.6 K  
D1 1.00000000 sec  
TD0 1  
SFO1 400.1324708 MHz  
NUC1 1H  
P1 10.00 usec  
PLW1 16.43099976 W

F2 - Processing parameters  
SI 65536  
SF 400.1300099 MHz  
WDW EM  
SSB 0  
LB 0.30 Hz  
GB 0  
FC 1.00

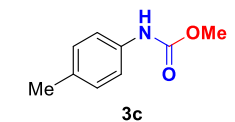

<sup>13</sup>C NMR (100 MHz, CDCl<sub>3</sub>)

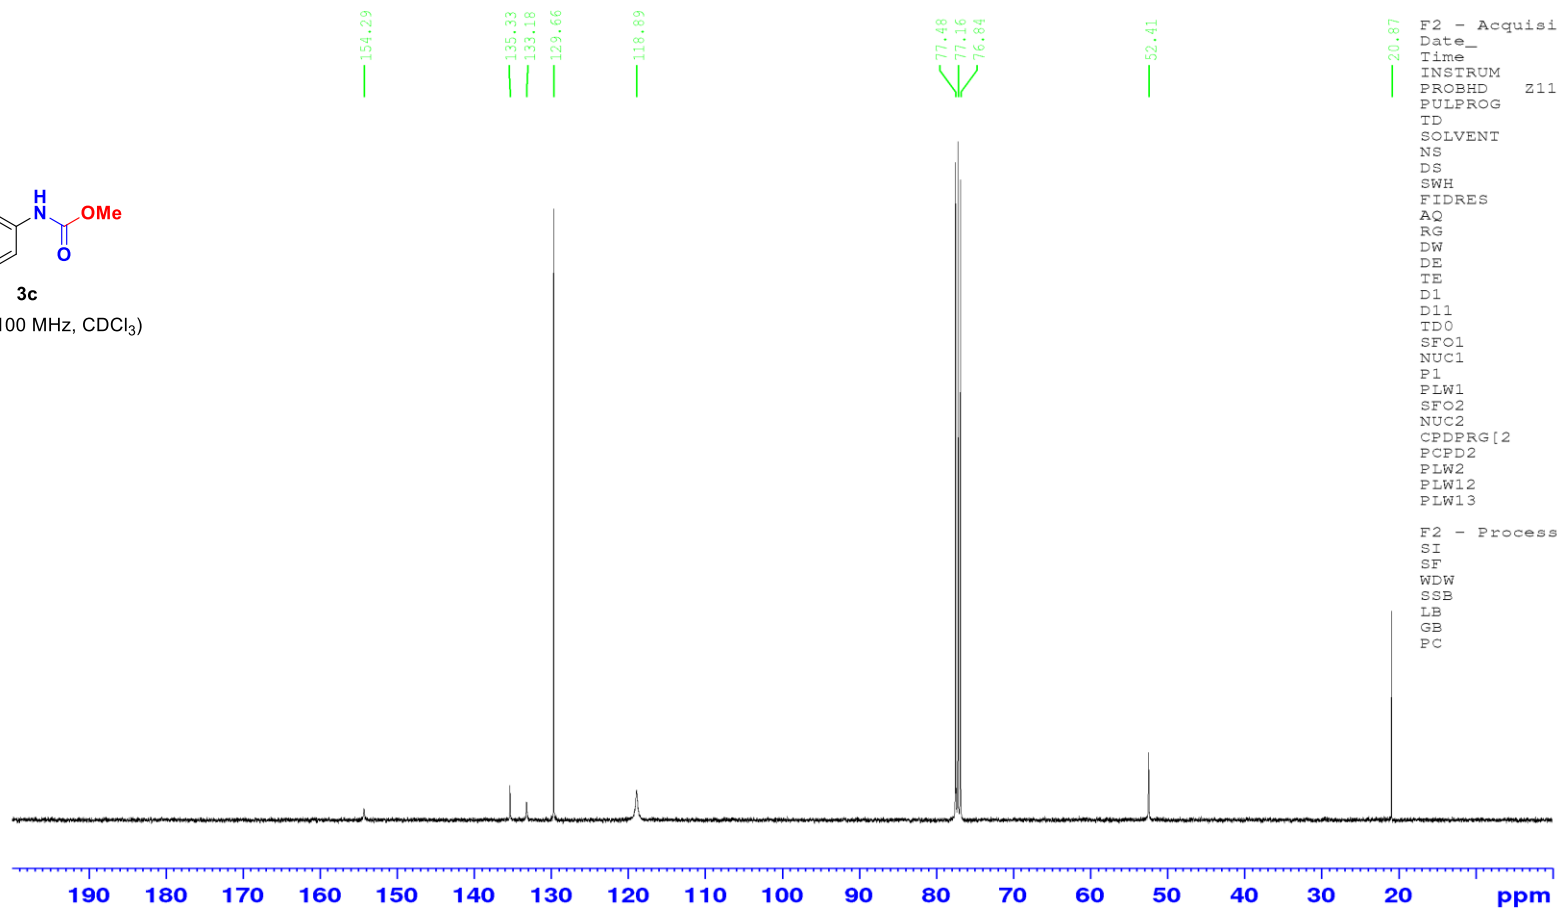

Current Data Parameters  
NAME lhz-20230407-3  
EXPNO 2  
PROCNO 1

F2 - Acquisition Parameters  
Date\_ 20230408  
Time 1.42 h  
INSTRUM spect  
PROBHD Z116098\_0653 (  
PULPROG zgpg30  
ID 65536  
SOLVENT CDCl3  
NS 1024  
DS 4  
SWH 24038.461 Hz  
FIDRES 0.733596 Hz  
AQ 1.3631488 sec  
RG 198.36  
DW 20.800 usec  
DE 6.50 usec  
TE 292.9 K  
D1 2.00000000 sec  
D11 0.03000000 sec  
TD0 1  
SFO1 100.6228298 MHz  
NUC1 13c  
P1 10.00 usec  
PLW1 75.84400177 W  
SFO2 400.1316005 MHz  
NUC2 1H  
CPDPRG[2] waltz16  
PCPD2 90.00 usec  
PLW2 16.43099976 W  
PLW12 0.20286000 W  
PLW13 0.10204000 W

F2 - Processing parameters  
SI 32768  
SF 100.6127594 MHz  
WDW EM  
SSB 0  
LB 1.00 Hz  
GB 0  
PC 1.40



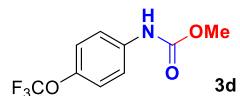

<sup>1</sup>H NMR (400 MHz, CDCl<sub>3</sub>)

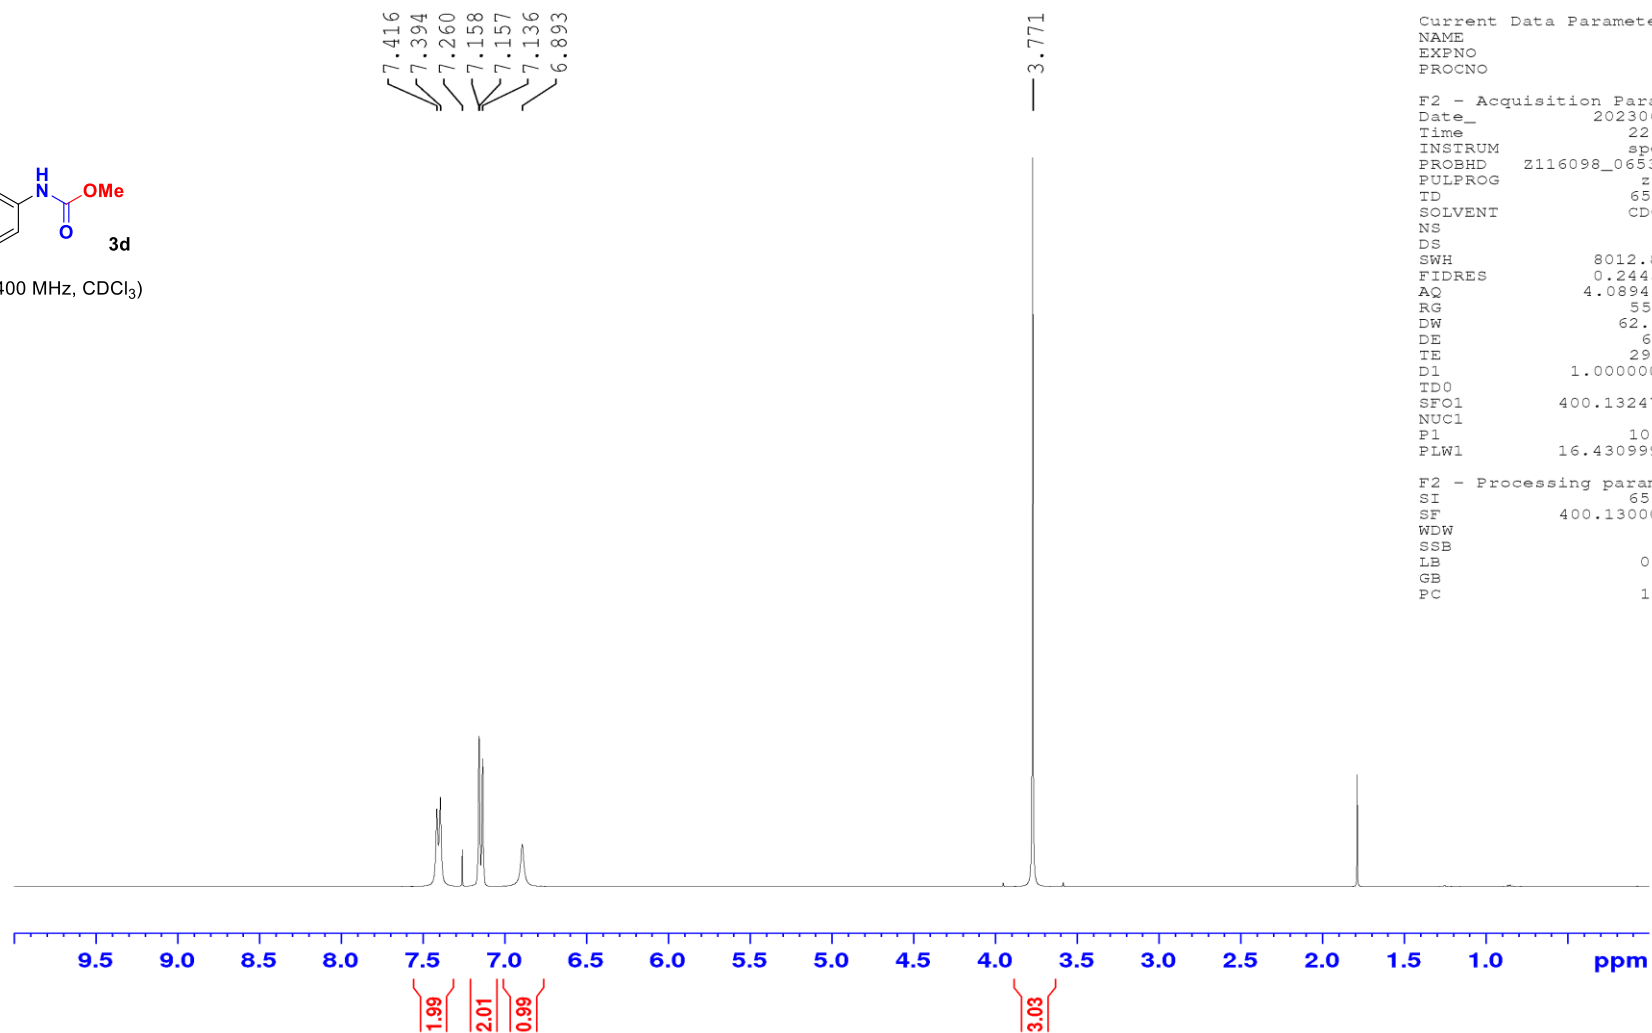

Current Data Parameters  
NAME S29  
EXPNO 1  
PROCNO 1

F2 - Acquisition Parameters  
Date\_ 20230601  
Time 22.57 h  
INSTRUM spect  
PROBHD Z116098\_0653 (  
PULPROG zg30  
TD 65536  
SOLVENT CDCl3  
NS 16  
DS 2  
SWH 8012.820 Hz  
FIDRES 0.244532 Hz  
AQ 4.0894465 sec  
RG 55.99  
DW 62.400 usec  
DE 6.50 usec  
TE 294.6 K  
D1 1.00000000 sec  
TD0 1  
SFO1 400.1324708 MHz  
NUC1 1H  
P1 10.00 usec  
PLW1 16.43099976 W

F2 - Processing parameters  
SI 65536  
SF 400.1300097 MHz  
WDW EM  
SSB 0  
LB 0.30 Hz  
GB 0  
PC 1.00

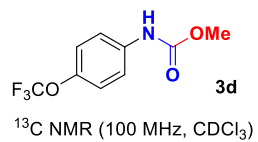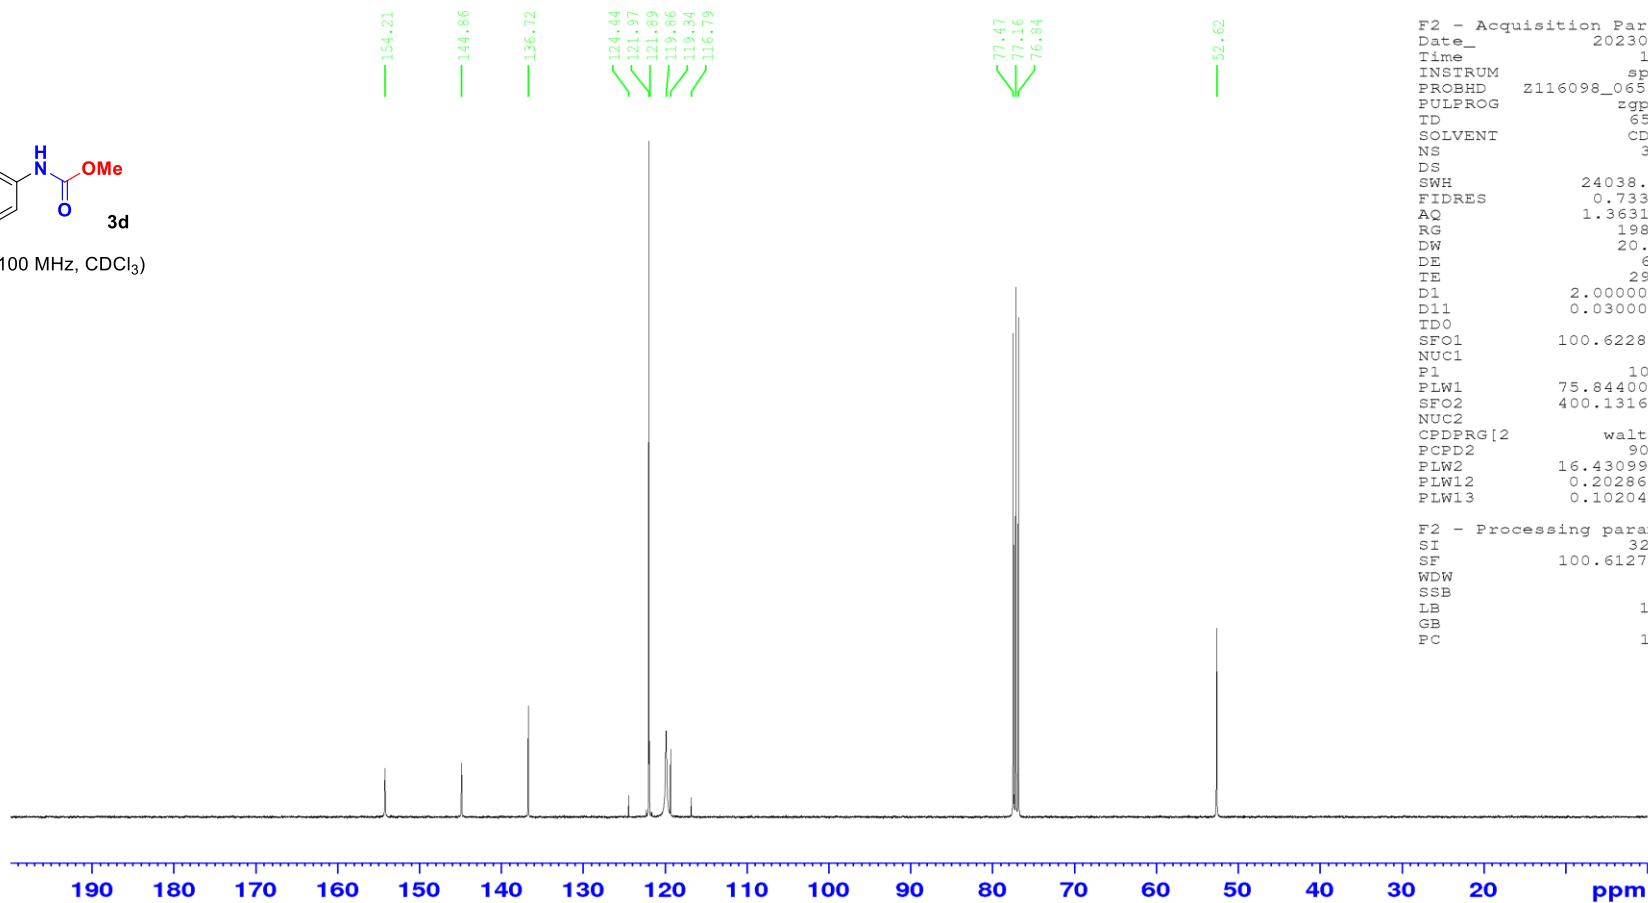

Current Data Parameters  
 NAME S29  
 EXPNO 2  
 PROCNO 1

F2 - Acquisition Parameters  
 Date\_ 20230602  
 Time 1.50 h  
 INSTRUM spect  
 PROBHD z116098\_0653 (  
 PULPROG zgpg30  
 TD 65536  
 SOLVENT CDCl3  
 NS 3000  
 DS 4  
 SWH 24038.461 Hz  
 FIDRES 0.733596 Hz  
 AQ 1.3631488 sec  
 RG 198.36  
 DW 20.800 usec  
 DE 6.50 usec  
 TE 295.4 K  
 D1 2.00000000 sec  
 D11 0.03000000 sec  
 TD0 1  
 SFO1 100.6228298 MHz  
 NUC1 13c  
 P1 10.00 usec  
 PLW1 75.84400177 W  
 SFO2 400.1316005 MHz  
 NUC2 1H  
 CPDPRG[2] waltz16  
 PCPD2 90.00 usec  
 PLW2 16.43099976 W  
 PLW12 0.20286000 W  
 PLW13 0.10204000 W

F2 - Processing parameters  
 SI 32768  
 SF 100.6127572 MHz  
 WDW EM  
 SSB 0  
 LB 1.00 Hz  
 GB 0  
 FC 1.40

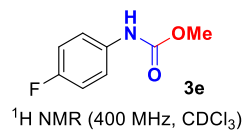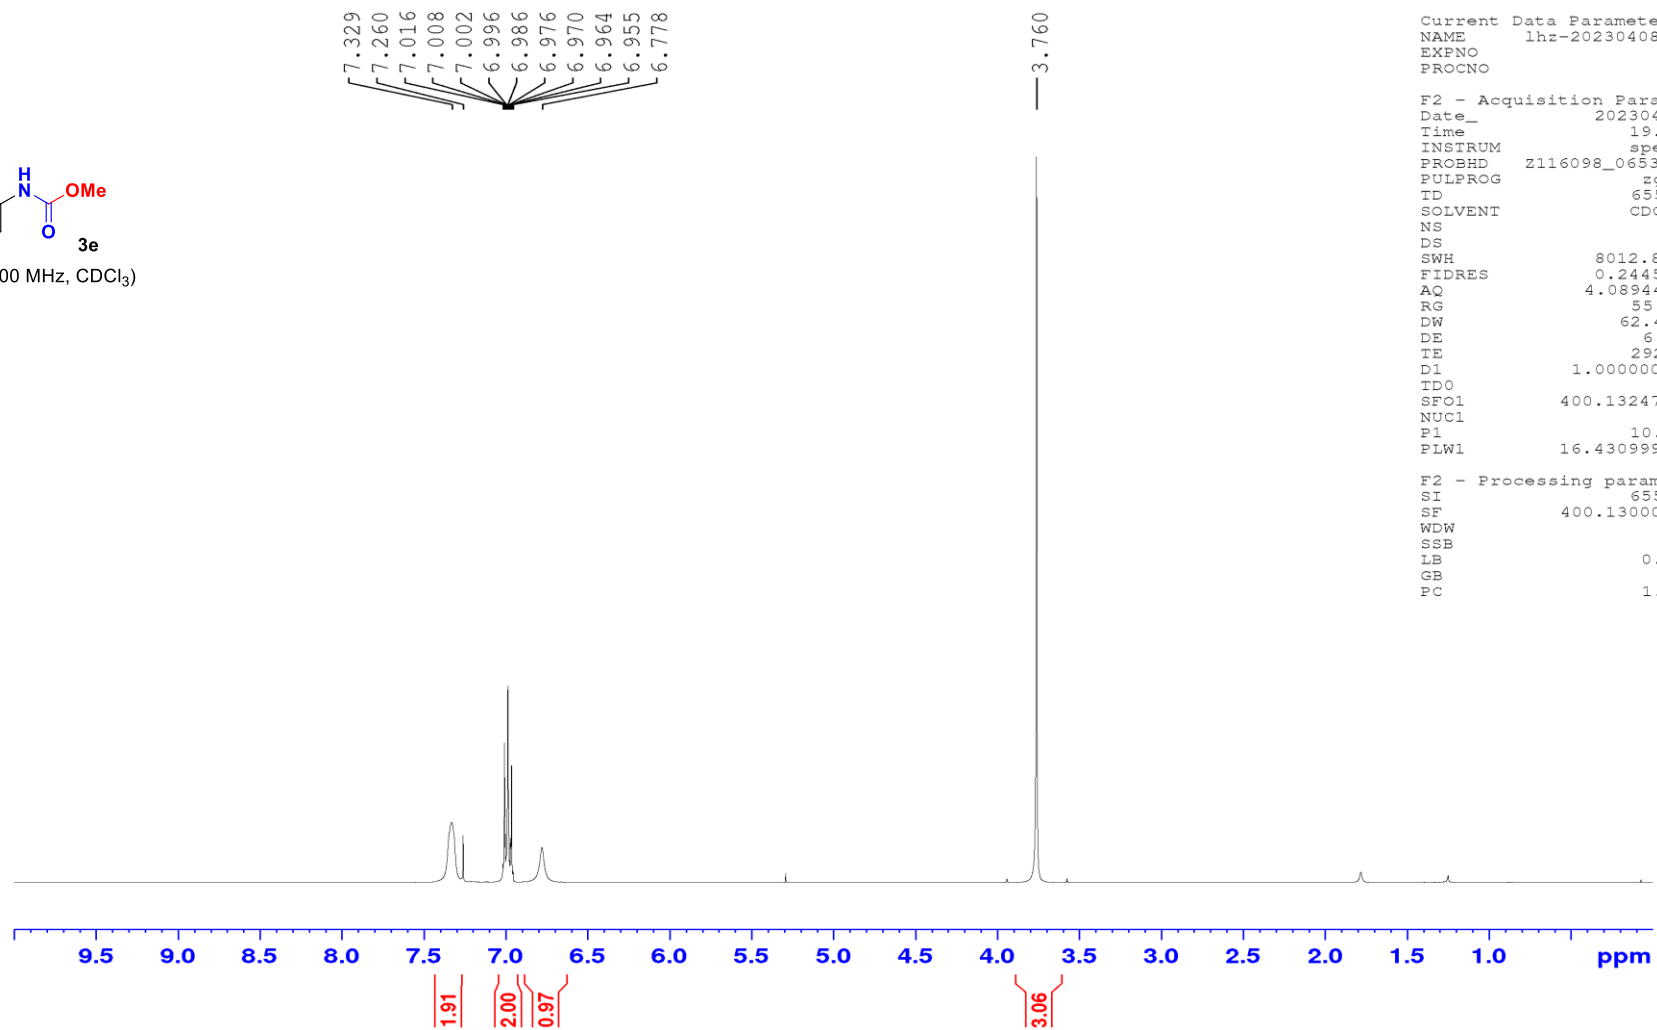

```
Current Data Parameters
NAME      lhz-20230408-3
EXPNO     1
PROCNO    1

F2 - Acquisition Parameters
Date_     20230408
Time      19.45 h
INSTRUM   spect
PROBHD    Z116098_0653 (
PULPROG   zg30
TD         65536
SOLVENT   CDCl3
NS         16
DS         2
SWH        8012.820 Hz
FIDRES     0.244532 Hz
AQ         4.0894465 sec
RG         55.99
DW         62.400 usec
DE         6.50 usec
TE         292.4 K
D1         1.00000000 sec
TD0        1
SFO1      400.1324708 MHz
NUC1       1H
P1         10.00 usec
PLW1      16.43099976 W

F2 - Processing parameters
SI         65536
SF         400.1300098 MHz
WDW        EM
SSB        0
LB         0.30 Hz
GB         0
FC         1.00
```

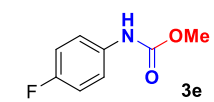

<sup>13</sup>C NMR (100 MHz, CDCl<sub>3</sub>)

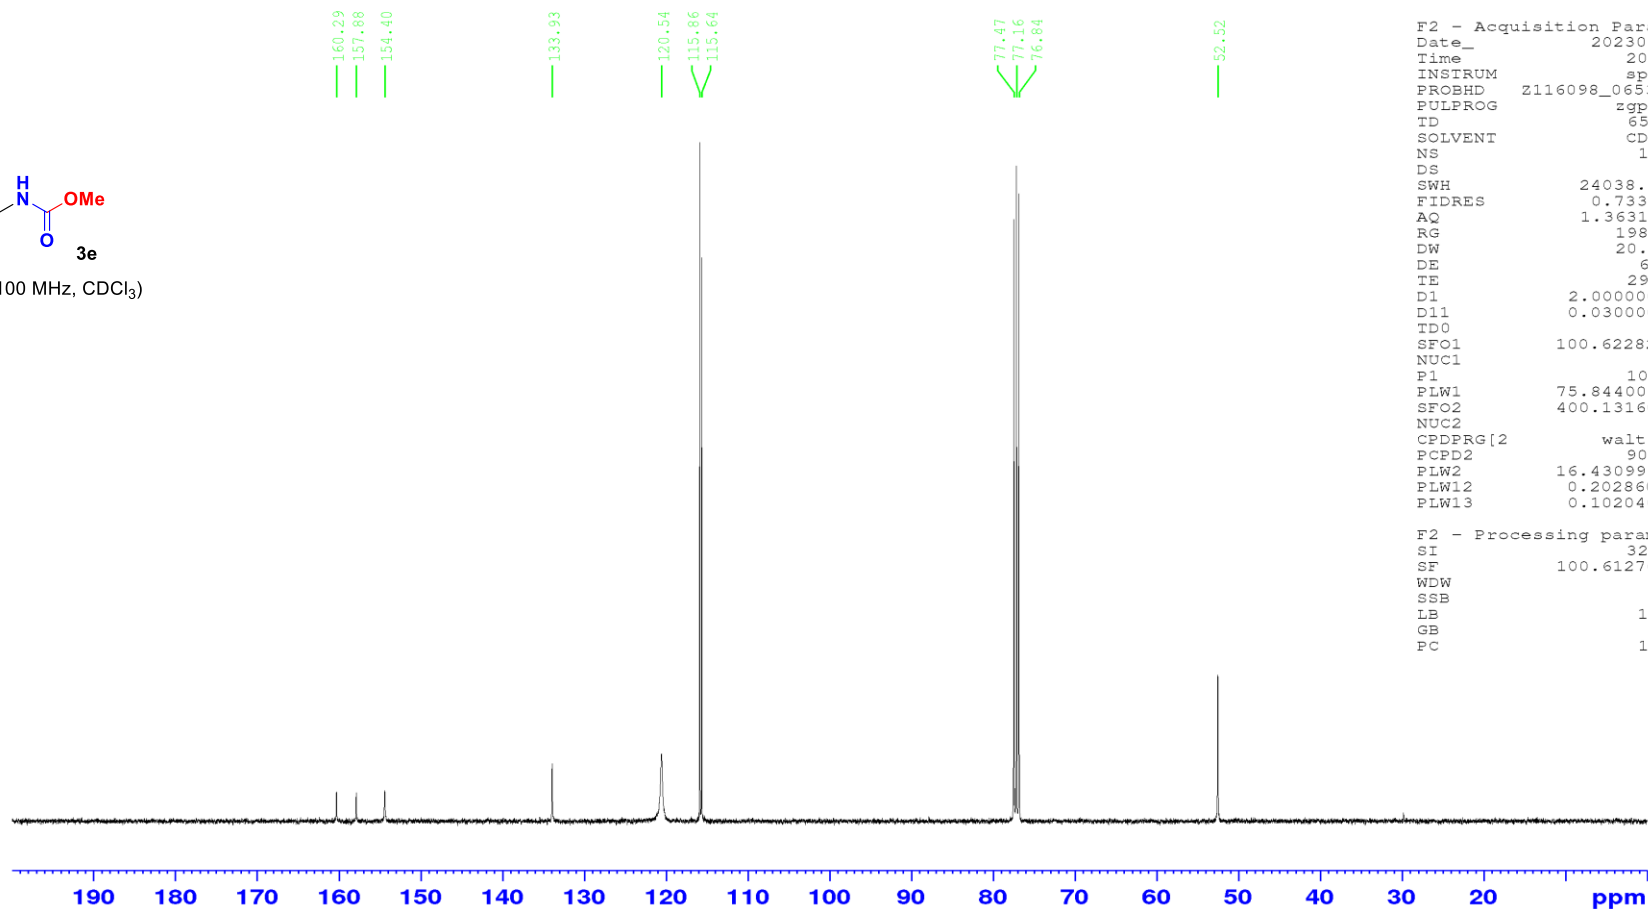

Current Data Parameters  
NAME lhz-20230408-3  
EXPNO 2  
PROCNO 1

F2 - Acquisition Parameters  
Date\_ 20230408  
Time 20.44 h  
INSTRUM spect  
PROBHD Z116098\_0653 (  
PULPROG zgpg30  
TD 65536  
SOLVENT CDCl3  
NS 1024  
DS 4  
SWH 24038.461 Hz  
FIDRES 0.733596 Hz  
AQ 1.3631488 sec  
RG 198.36  
DW 20.800 usec  
DE 6.50 usec  
TE 293.0 K  
D1 2.00000000 sec  
D11 0.03000000 sec  
TD0 1  
SFO1 100.6228298 MHz  
NUC1 13C  
P1 10.00 usec  
PLW1 75.84400177 W  
SFO2 400.1316005 MHz  
NUC2 1H  
CPDPRG[2] waltz16  
PCPD2 90.00 usec  
PLW2 16.43099976 W  
PLW12 0.20286000 W  
PLW13 0.10204000 W

F2 - Processing parameters  
SI 32768  
SF 100.6127601 MHz  
WDW EM  
SSB 0  
LB 1.00 Hz  
GB 0  
FC 1.40

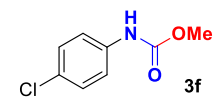

<sup>1</sup>H NMR (400 MHz, CDCl<sub>3</sub>)

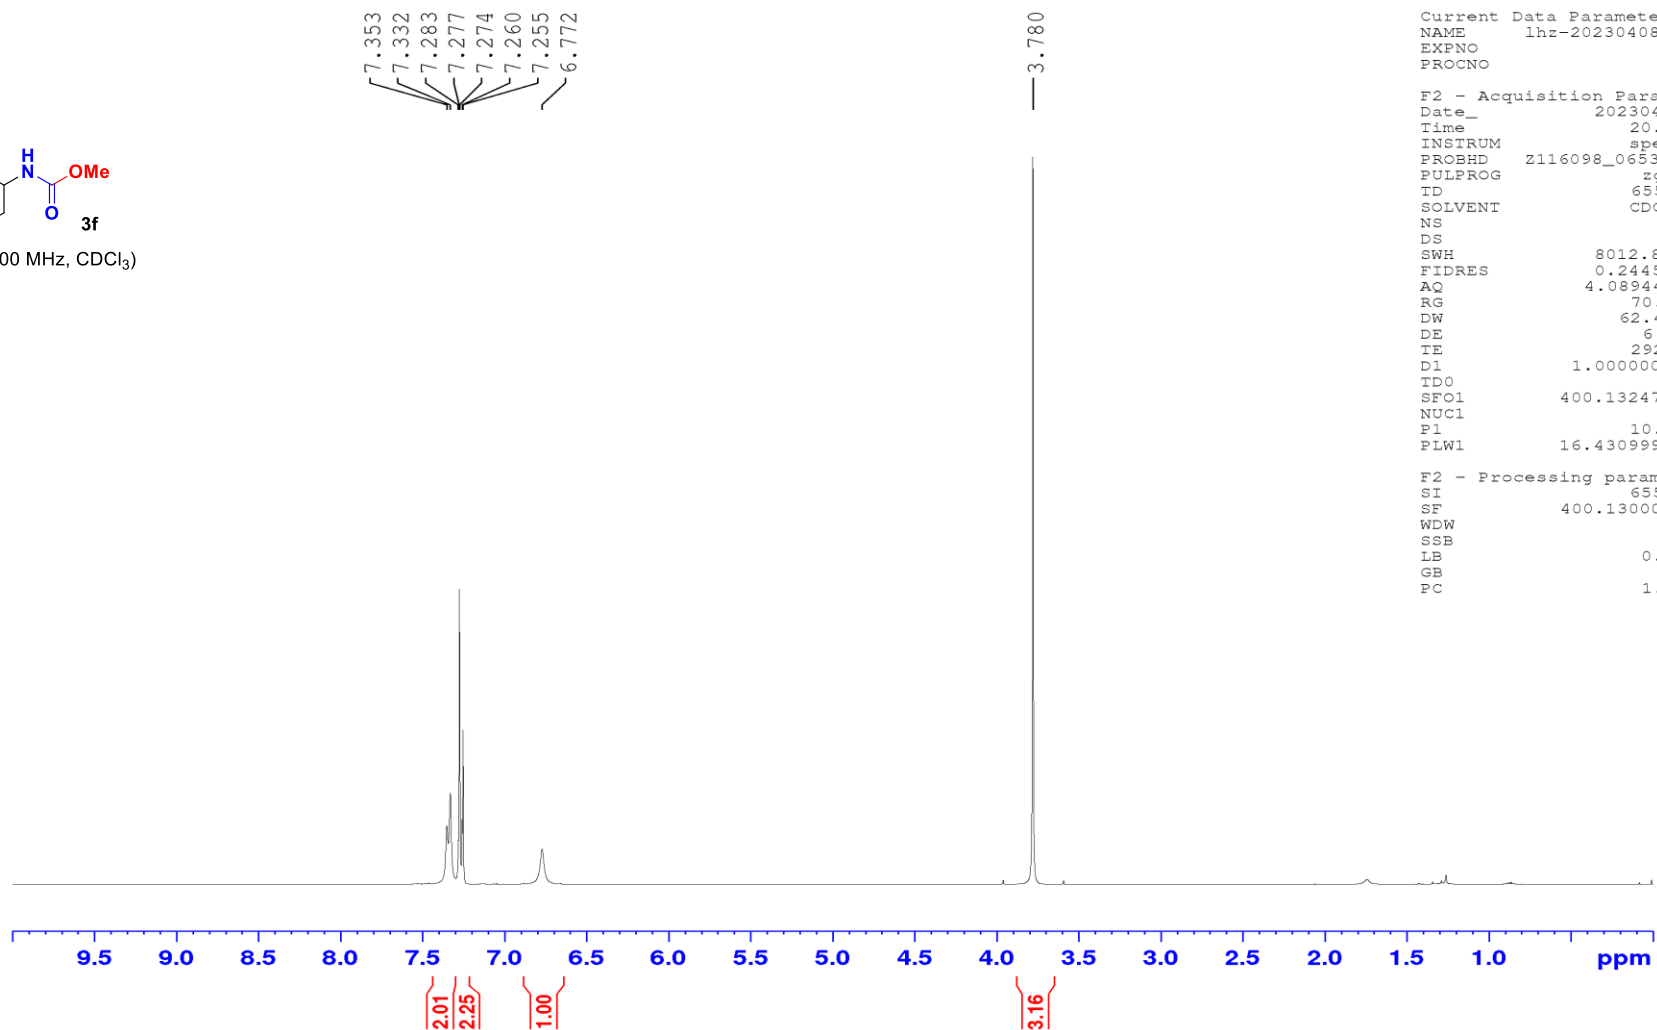

Current Data Parameters  
NAME lhz-20230408-4  
EXPNO 1  
PROCNO 1

F2 - Acquisition Parameters  
Date\_ 20230408  
Time 20.49 h  
INSTRUM spect  
PROBHD Z116098\_0653 (  
PULPROG zg30  
TD 65536  
SOLVENT CDCl3  
NS 16  
DS 2  
SWH 8012.820 Hz  
FIDRES 0.244532 Hz  
AQ 4.0894465 sec  
RG 70.89  
DW 62.400 usec  
DE 6.50 usec  
TE 292.2 K  
D1 1.00000000 sec  
TD0 1  
SFO1 400.1324708 MHz  
NUC1 1H  
P1 10.00 usec  
PLW1 16.43099976 W

F2 - Processing parameters  
SI 65536  
SF 400.1300045 MHz  
WDW EM  
SSB 0  
LB 0.30 Hz  
GB 0  
PC 1.00

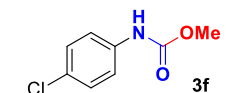

<sup>13</sup>C NMR (100 MHz, CDCl<sub>3</sub>)

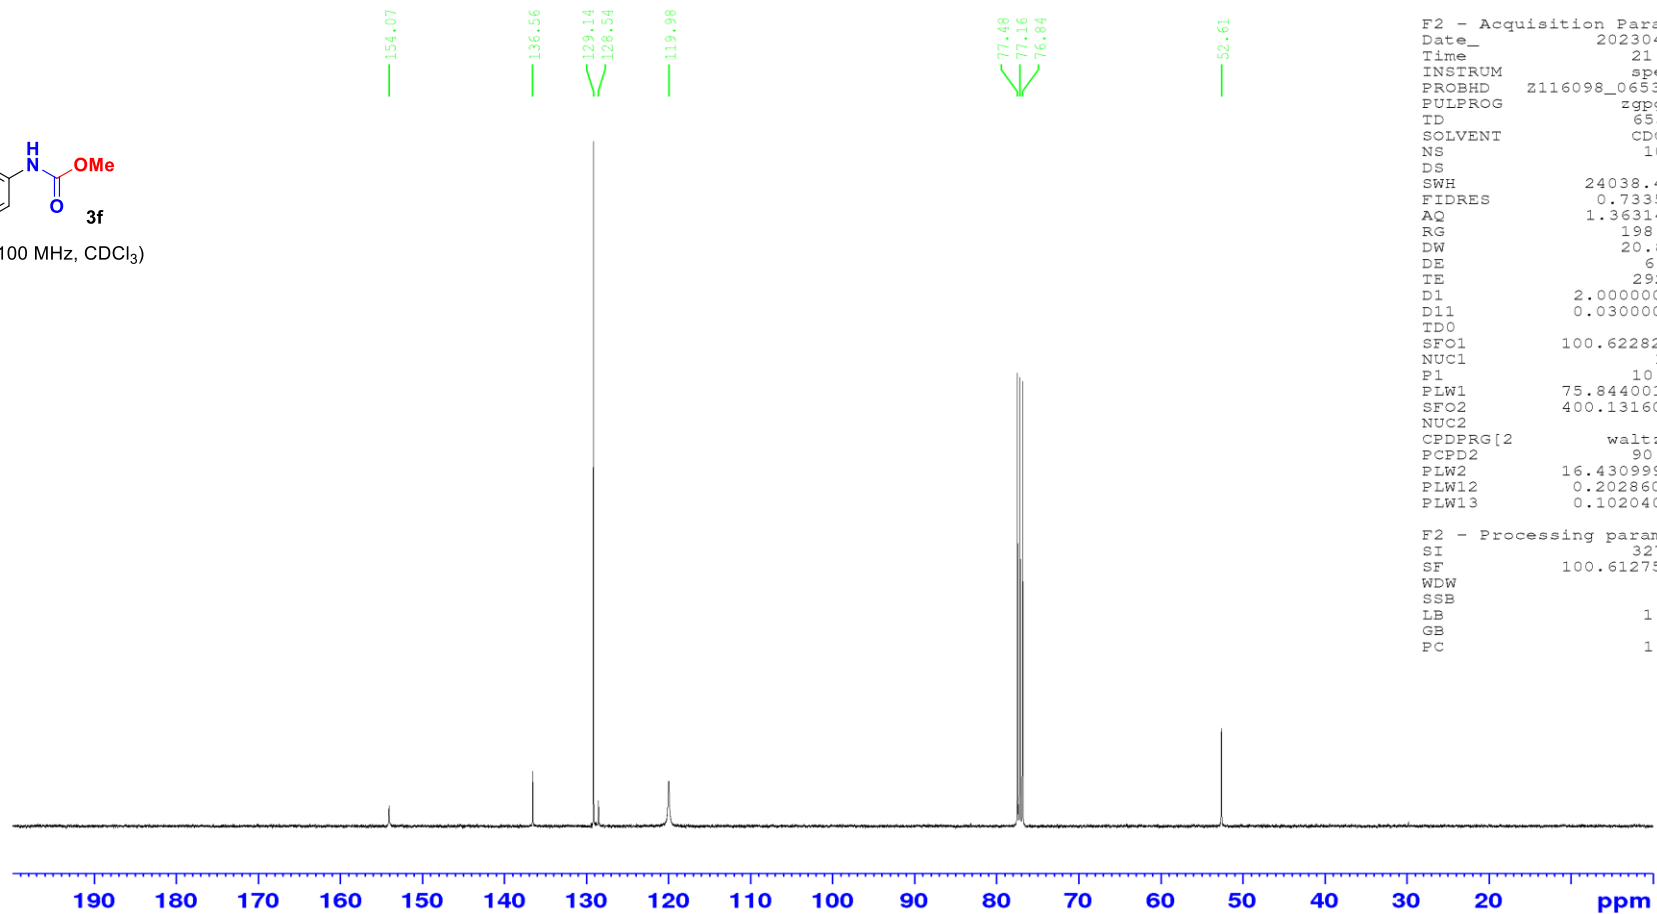

Current Data Parameters  
 NAME 1hz-20230408-4  
 EXPNO 2  
 PROCNO 1

F2 - Acquisition Parameters  
 Date\_ 20230408  
 Time 21.48 h  
 INSTRUM spect  
 PROBHD Z116098\_0653 ( )  
 PULPROG zgpg30  
 TD 65536  
 SOLVENT CDCl3  
 NS 1024  
 DS 4  
 SWH 24038.461 Hz  
 FIDRES 0.733596 Hz  
 AQ 1.3631488 sec  
 RG 198.36  
 DW 20.800 usec  
 DE 6.50 usec  
 TE 292.6 K  
 D1 2.00000000 sec  
 D11 0.03000000 sec  
 TD0 1  
 SFO1 100.6228298 MHz  
 NUC1 13C  
 P1 10.00 usec  
 PLW1 75.84400177 W  
 SFO2 400.1316005 MHz  
 NUC2 1H  
 CPDPRG[2] waltz16  
 PCPD2 90.00 usec  
 PLW2 16.43099976 W  
 PLW12 0.20286000 W  
 PLW13 0.10204000 W

F2 - Processing parameters  
 SI 32768  
 SF 100.6127594 MHz  
 WDW EM  
 SSB 0  
 LB 1.00 Hz  
 GB 0  
 PC 1.40

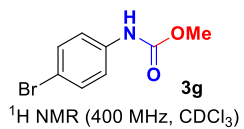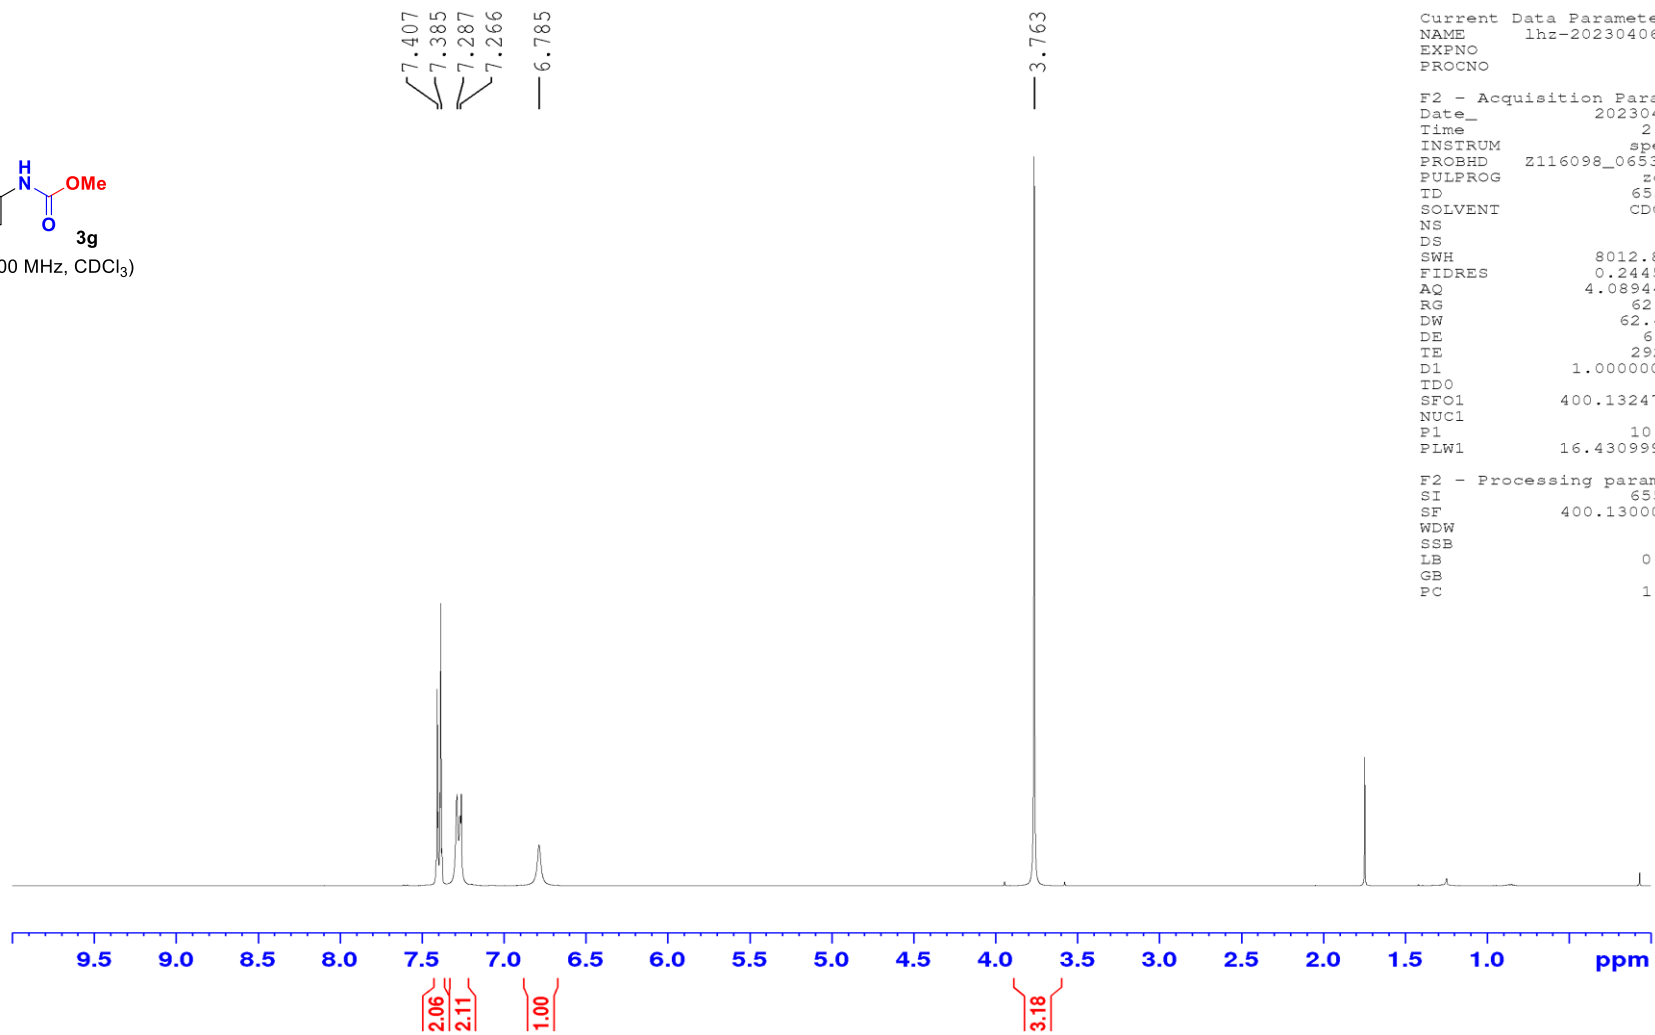

```

Current Data Parameters
NAME      lhz-20230406-6
EXPNO     1
PROCNO    1

F2 - Acquisition Parameters
Date_     20230407
Time      2.54 h
INSTRUM   spect
PROBHD    Z116098_0653 (
PULPROG   zg30
TD         65536
SOLVENT   CDCl3
NS         16
DS         2
SWH        8012.820 Hz
FIDRES     0.244532 Hz
AQ          4.0894465 sec
RG          62.98
DW          62.400 usec
DE          6.50 usec
TE          292.0 K
D1          1.00000000 sec
TD0         1
SFO1       400.1324708 MHz
NUC1        1H
P1          10.00 usec
PLW1       16.43099976 W

F2 - Processing parameters
SI          65536
SF          400.1300099 MHz
WDW         EM
SSB         0
LB          0.30 Hz
GB          0
PC          1.00
  
```

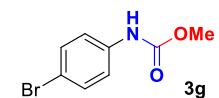

<sup>13</sup>C NMR (100 MHz, CDCl<sub>3</sub>)

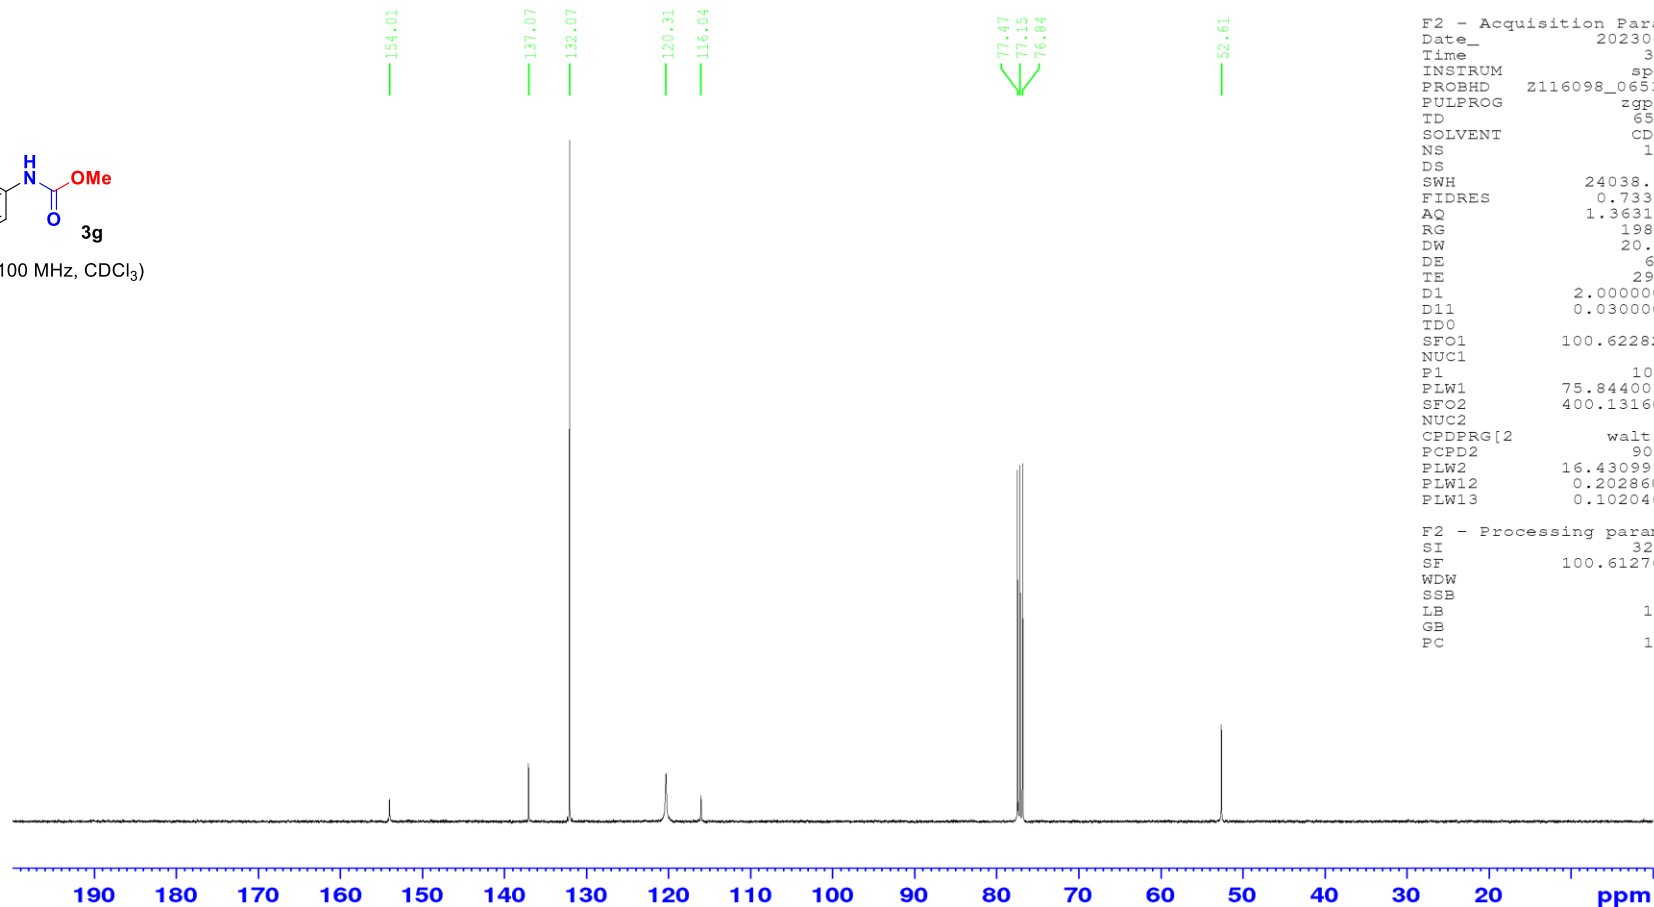

Current Data Parameters  
NAME 1hz-20230406-6  
EXPNO 2  
PROCNO 1

F2 - Acquisition Parameters  
Date\_ 20230407  
Time 3.53 h  
INSTRUM spect  
PROBHD Z116098\_0653 (  
PULPROG zgpg30  
ID 65536  
SOLVENT CDCl3  
NS 1024  
DS 4  
SWH 24038.461 Hz  
FIDRES 0.733596 Hz  
AQ 1.3631488 sec  
RG 198.36  
DW 20.800 usec  
DE 6.50 usec  
TE 292.8 K  
D1 2.00000000 sec  
D11 0.03000000 sec  
TD0 1  
SFO1 100.6228298 MHz  
NUC1 13C  
P1 10.00 usec  
PLW1 75.84400177 W  
SFO2 400.1316005 MHz  
NUC2 1H  
CPDPRG[2] waltz16  
PCPD2 90.00 usec  
PLW2 16.43099976 W  
PLW12 0.20286000 W  
PLW13 0.10204000 W

F2 - Processing parameters  
SI 32768  
SF 100.6127608 MHz  
WDW EM  
SSB 0  
LB 1.00 Hz  
GB 0  
PC 1.40



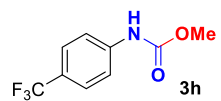

<sup>1</sup>H NMR (400 MHz, CDCl<sub>3</sub>)

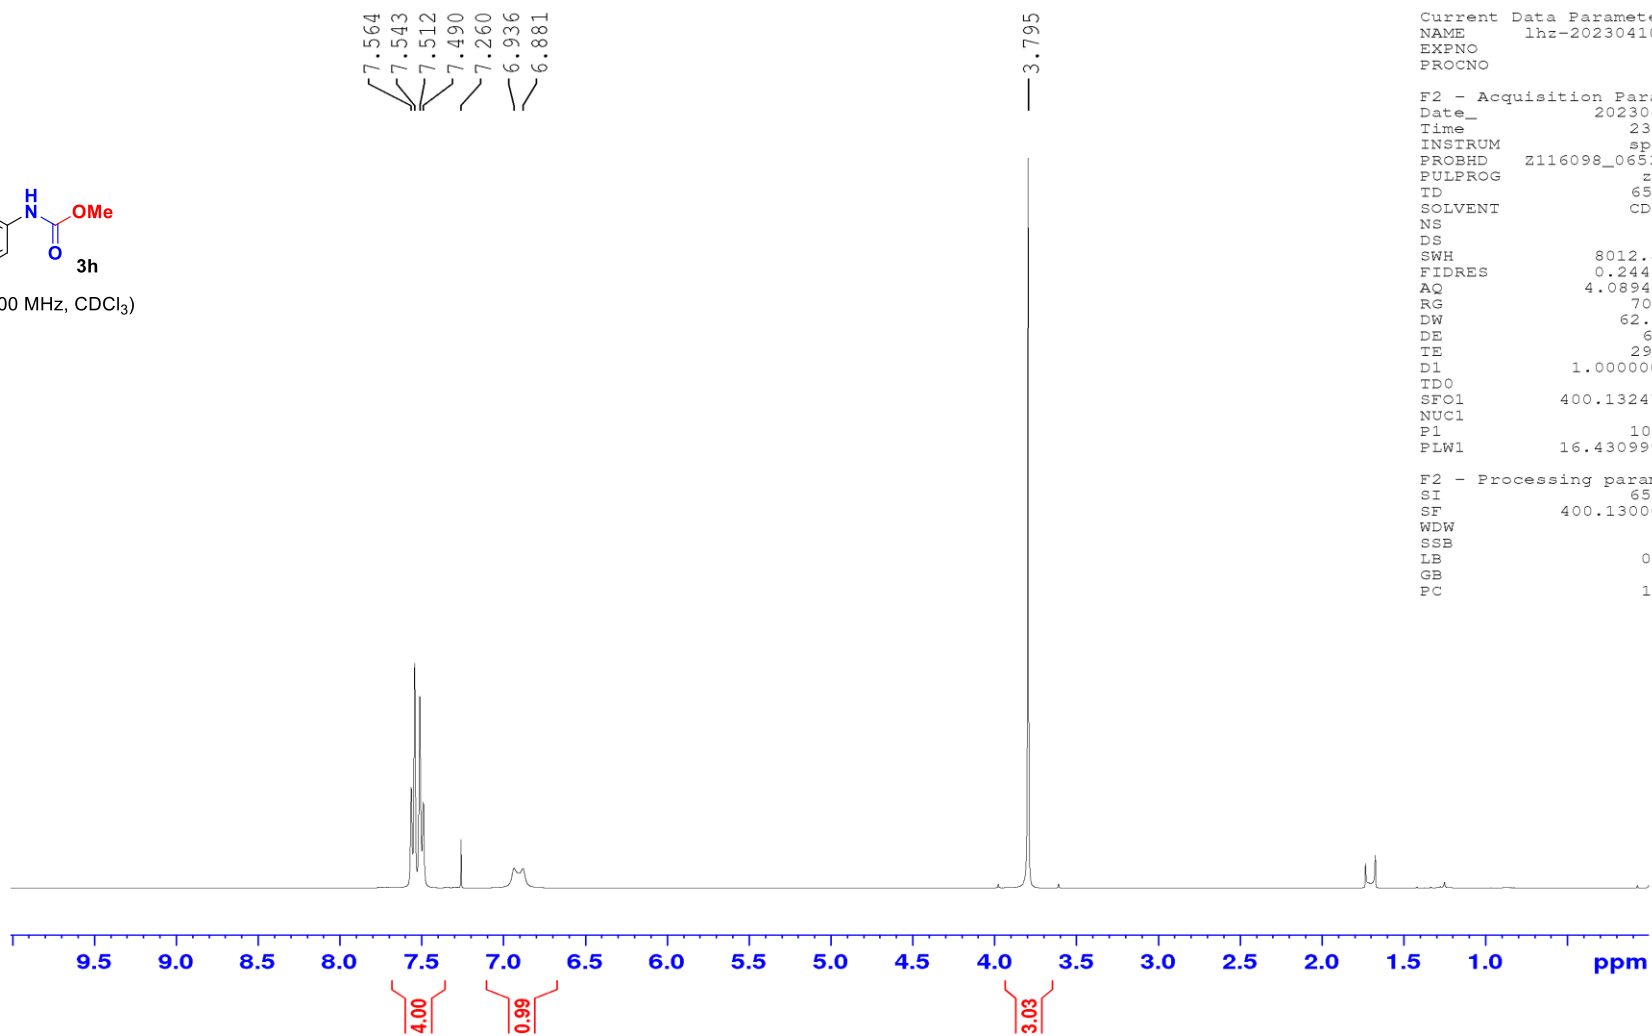

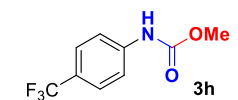

<sup>13</sup>C NMR (100 MHz, CDCl<sub>3</sub>)

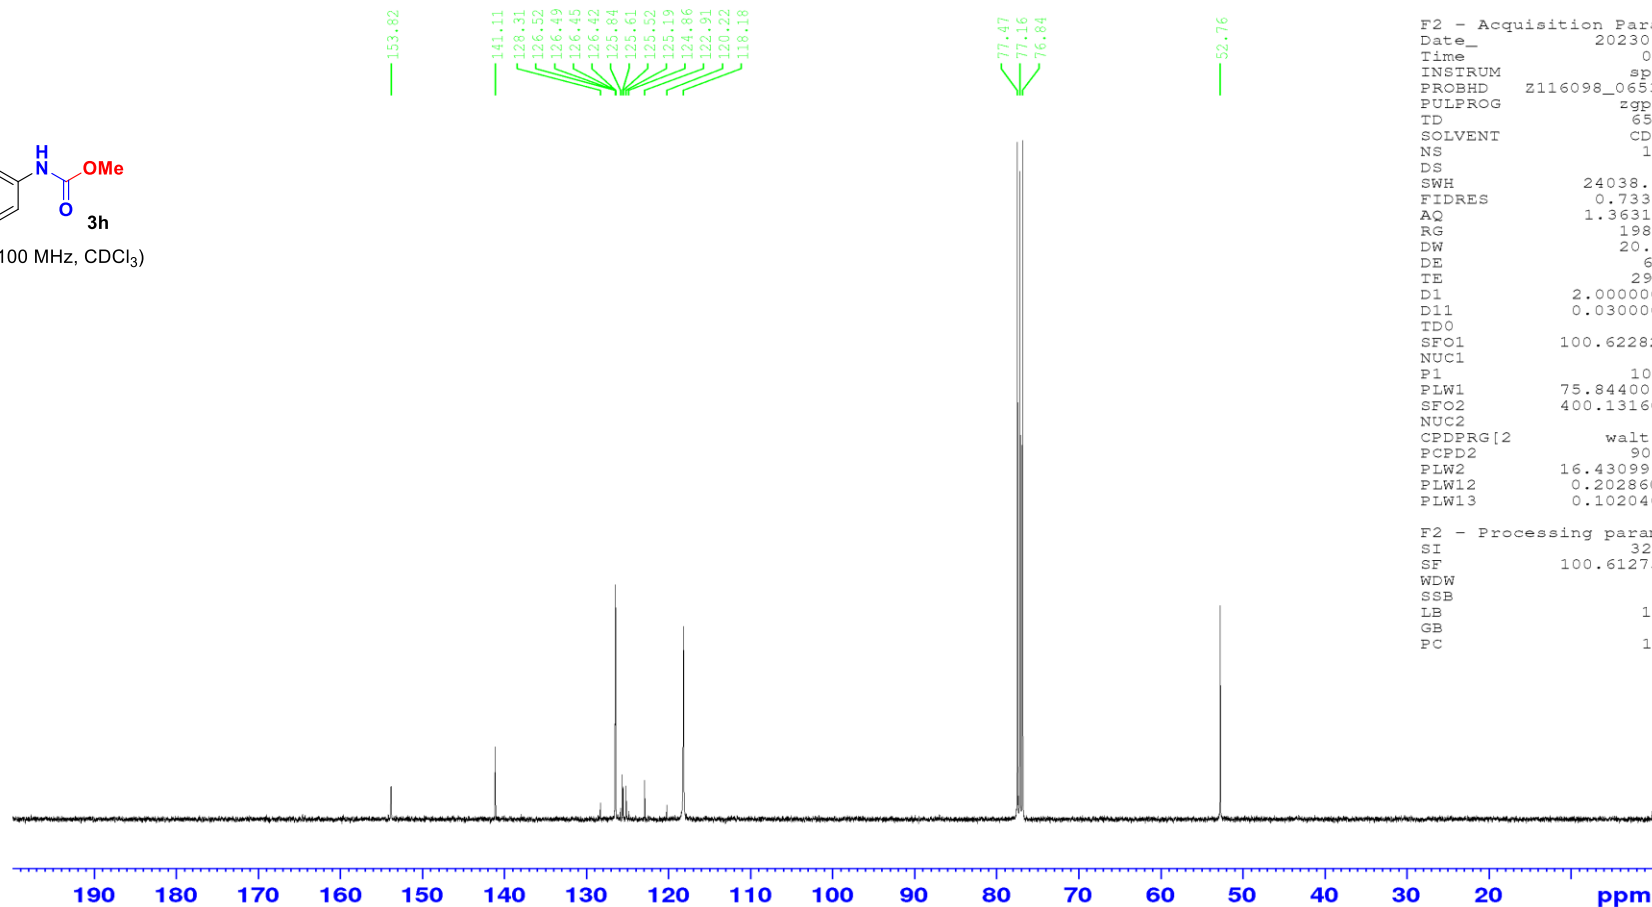

Current Data Parameters  
 NAME lhz-20230410-3  
 EXPNO 2  
 PROCNO 1

F2 - Acquisition Parameters  
 Date\_ 20230411  
 Time 0.36 h  
 INSTRUM spect  
 PROBHD Z116098\_0653 (  
 PULPROG zgpg30  
 TD 65536  
 SOLVENT CDCl3  
 NS 1024  
 DS 4  
 SWH 24038.461 Hz  
 FIDRES 0.733596 Hz  
 AQ 1.3631488 sec  
 RG 198.36  
 DW 20.800 usec  
 DE 6.50 usec  
 TE 292.4 K  
 D1 2.00000000 sec  
 D11 0.03000000 sec  
 TD0 1  
 SFO1 100.6228298 MHz  
 NUC1 13C  
 P1 10.00 usec  
 PLW1 75.84400177 W  
 SFO2 400.1316005 MHz  
 NUC2 1H  
 CPDPRG[2] waltz16  
 PCPD2 90.00 usec  
 PLW2 16.43099976 W  
 PLW12 0.20286000 W  
 PLW13 0.10204000 W

F2 - Processing parameters  
 SI 32768  
 SF 100.6127575 MHz  
 WDW EM  
 SSB 0  
 LB 1.00 Hz  
 GB 0  
 FC 1.40

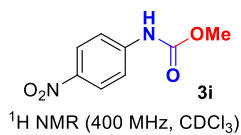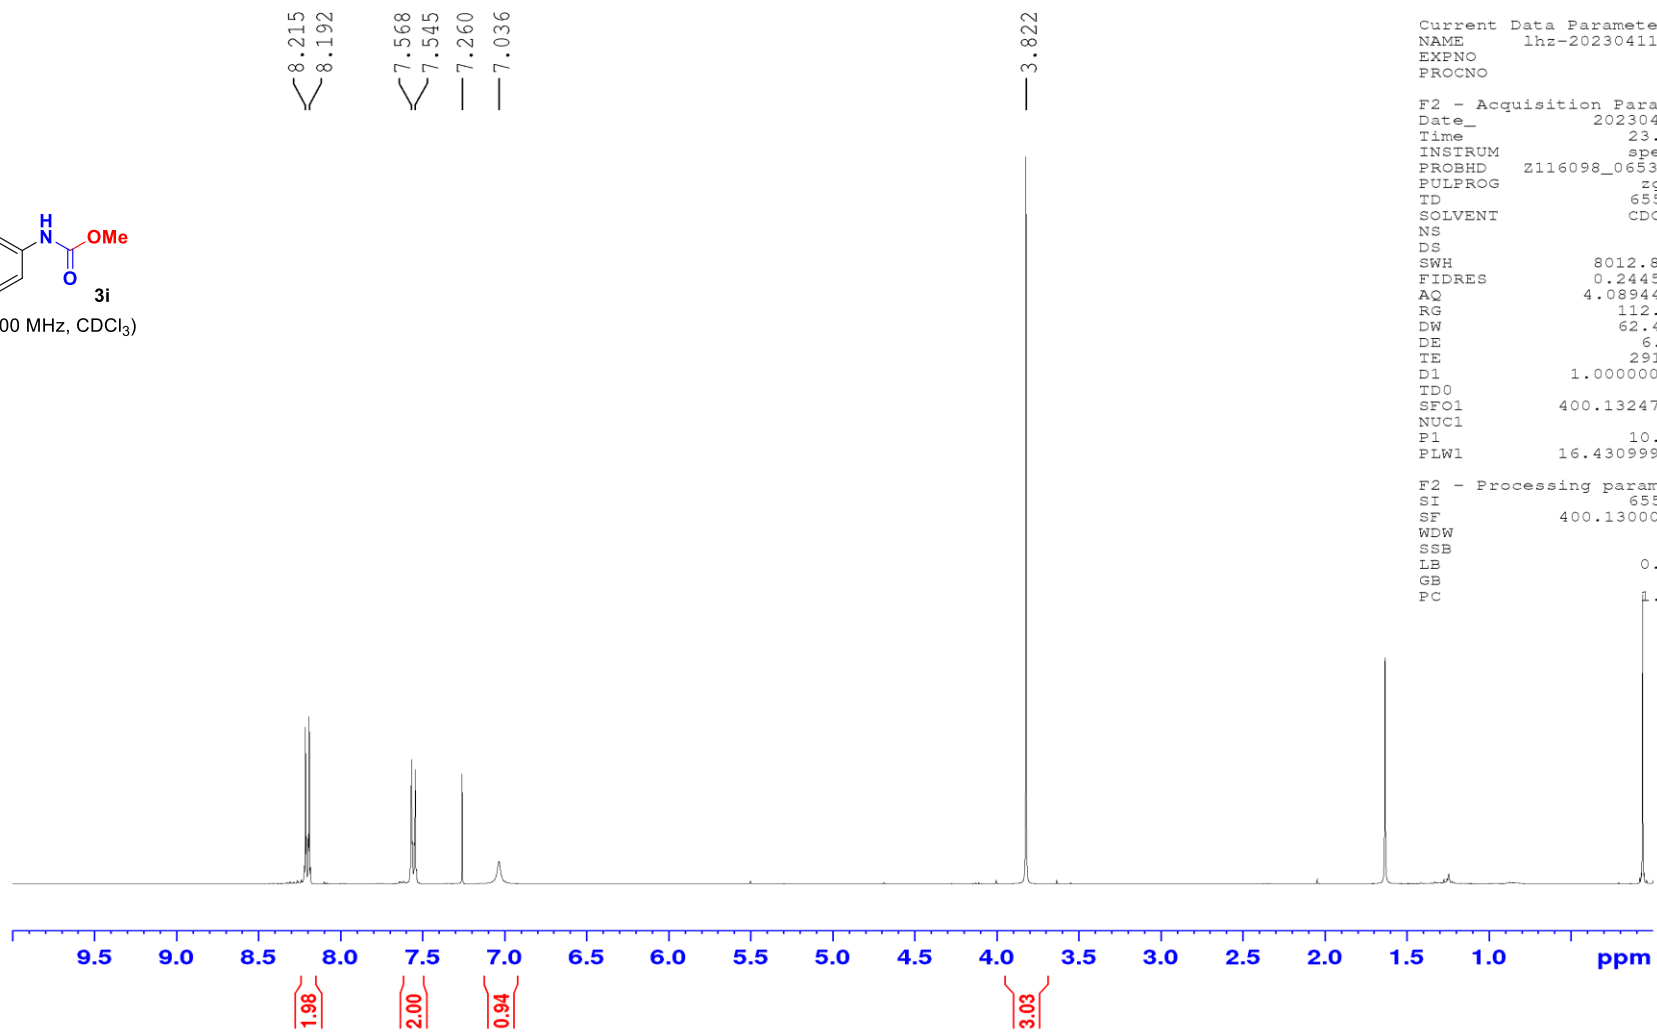

Current Data Parameters  
NAME lhz-20230411-1  
EXPNO 1  
PROCNO 1

F2 - Acquisition Parameters  
Date\_ 20230411  
Time 23.33 h  
INSTRUM spect  
PROBHD Z116098\_0653 (  
PULPROG zg30  
TD 65536  
SOLVENT CDCl3  
NS 16  
DS 2  
SWH 8012.820 Hz  
FIDRES 0.244532 Hz  
AQ 4.0894465 sec  
RG 112.15  
DW 62.400 usec  
DE 6.50 usec  
TE 291.8 K  
D1 1.00000000 sec  
TD0 1  
SFO1 400.1324708 MHz  
NUC1 1H  
P1 10.00 usec  
PLW1 16.43099976 W

F2 - Processing parameters  
SI 65536  
SF 400.1300099 MHz  
WDW EM  
SSB 0  
LB 0.30 Hz  
GB 0  
PC 1.00

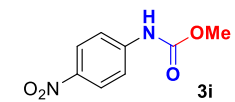

<sup>13</sup>C NMR (100 MHz, CDCl<sub>3</sub>)

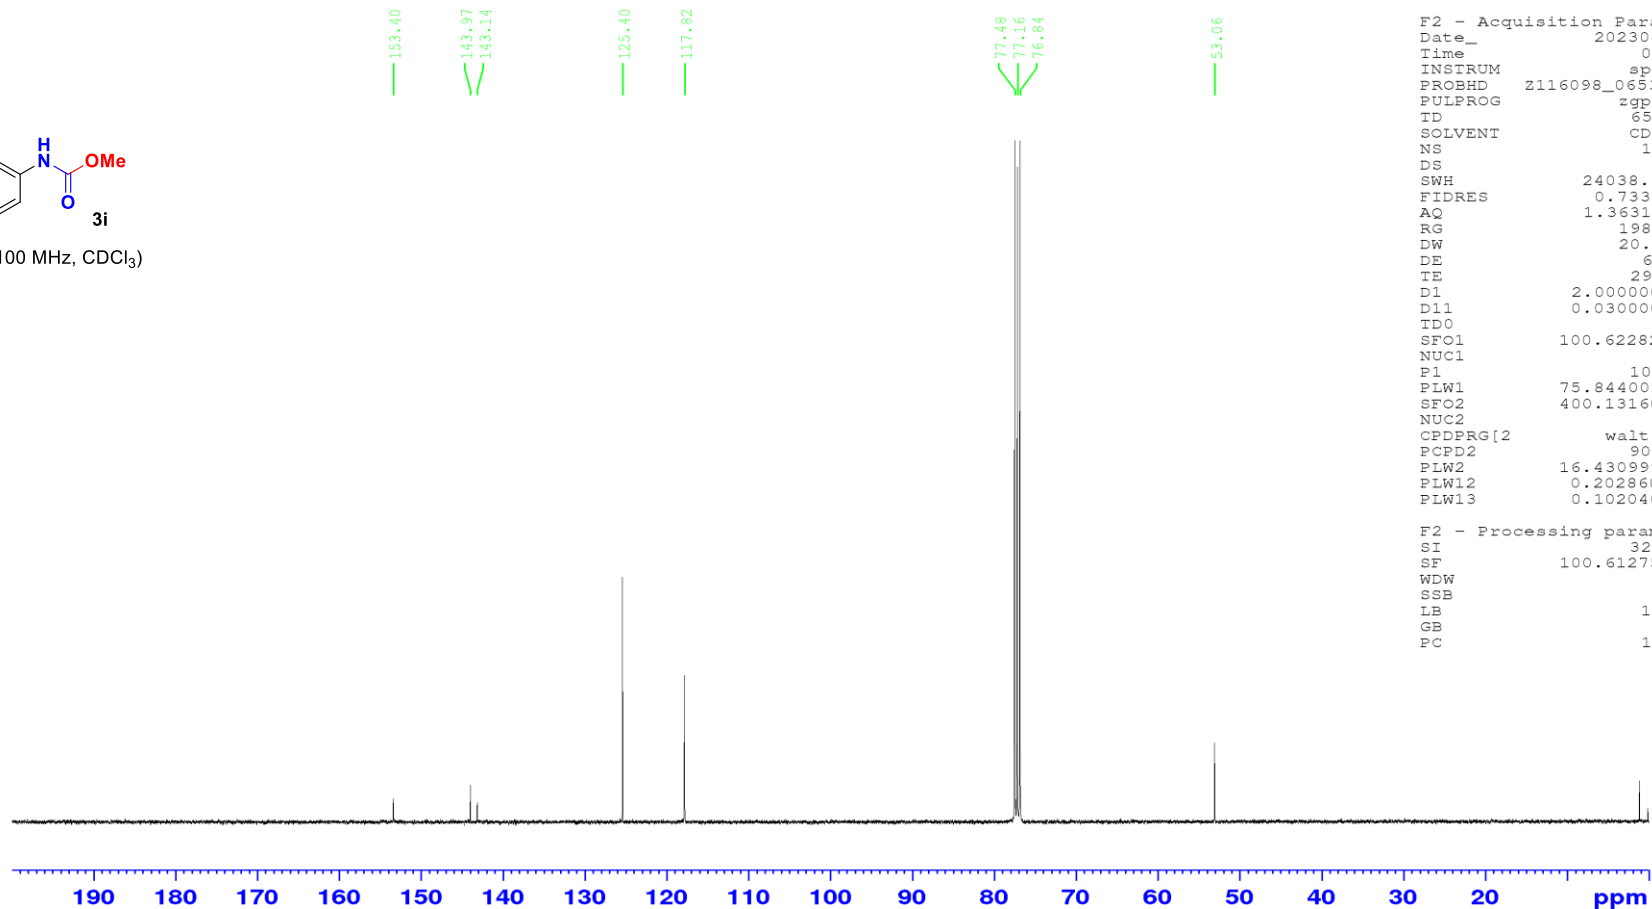

Current Data Parameters  
 NAME lhz-20230411-1  
 EXPNO 2  
 PROCNO 1

F2 - Acquisition Parameters  
 Date\_ 20230412  
 Time 0.51 h  
 INSTRUM spect  
 PROBHD Z116098\_0653 (  
 PULPROG zgpg30  
 TD 65536  
 SOLVENT CDCl3  
 NS 1333  
 DS 4  
 SWH 24038.461 Hz  
 FIDRES 0.733596 Hz  
 AQ 1.3631488 sec  
 RG 198.36  
 DW 20.800 usec  
 DE 6.50 usec  
 TE 292.4 K  
 D1 2.00000000 sec  
 D11 0.03000000 sec  
 TD0 1  
 SFO1 100.6228298 MHz  
 NUC1 13C  
 P1 10.00 usec  
 PLW1 75.84400177 W  
 SFO2 400.1316005 MHz  
 NUC2 1H  
 CPDPRG[2] waltz16  
 PCPD2 90.00 usec  
 PLW2 16.43099976 W  
 PLW12 0.20286000 W  
 PLW13 0.10204000 W

F2 - Processing parameters  
 SI 32768  
 SF 100.6127572 MHz  
 WDW EM  
 SSB 0  
 LB 1.00 Hz  
 GB 0  
 FC 1.40

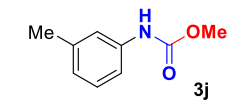

<sup>1</sup>H NMR (400 MHz, CDCl<sub>3</sub>)

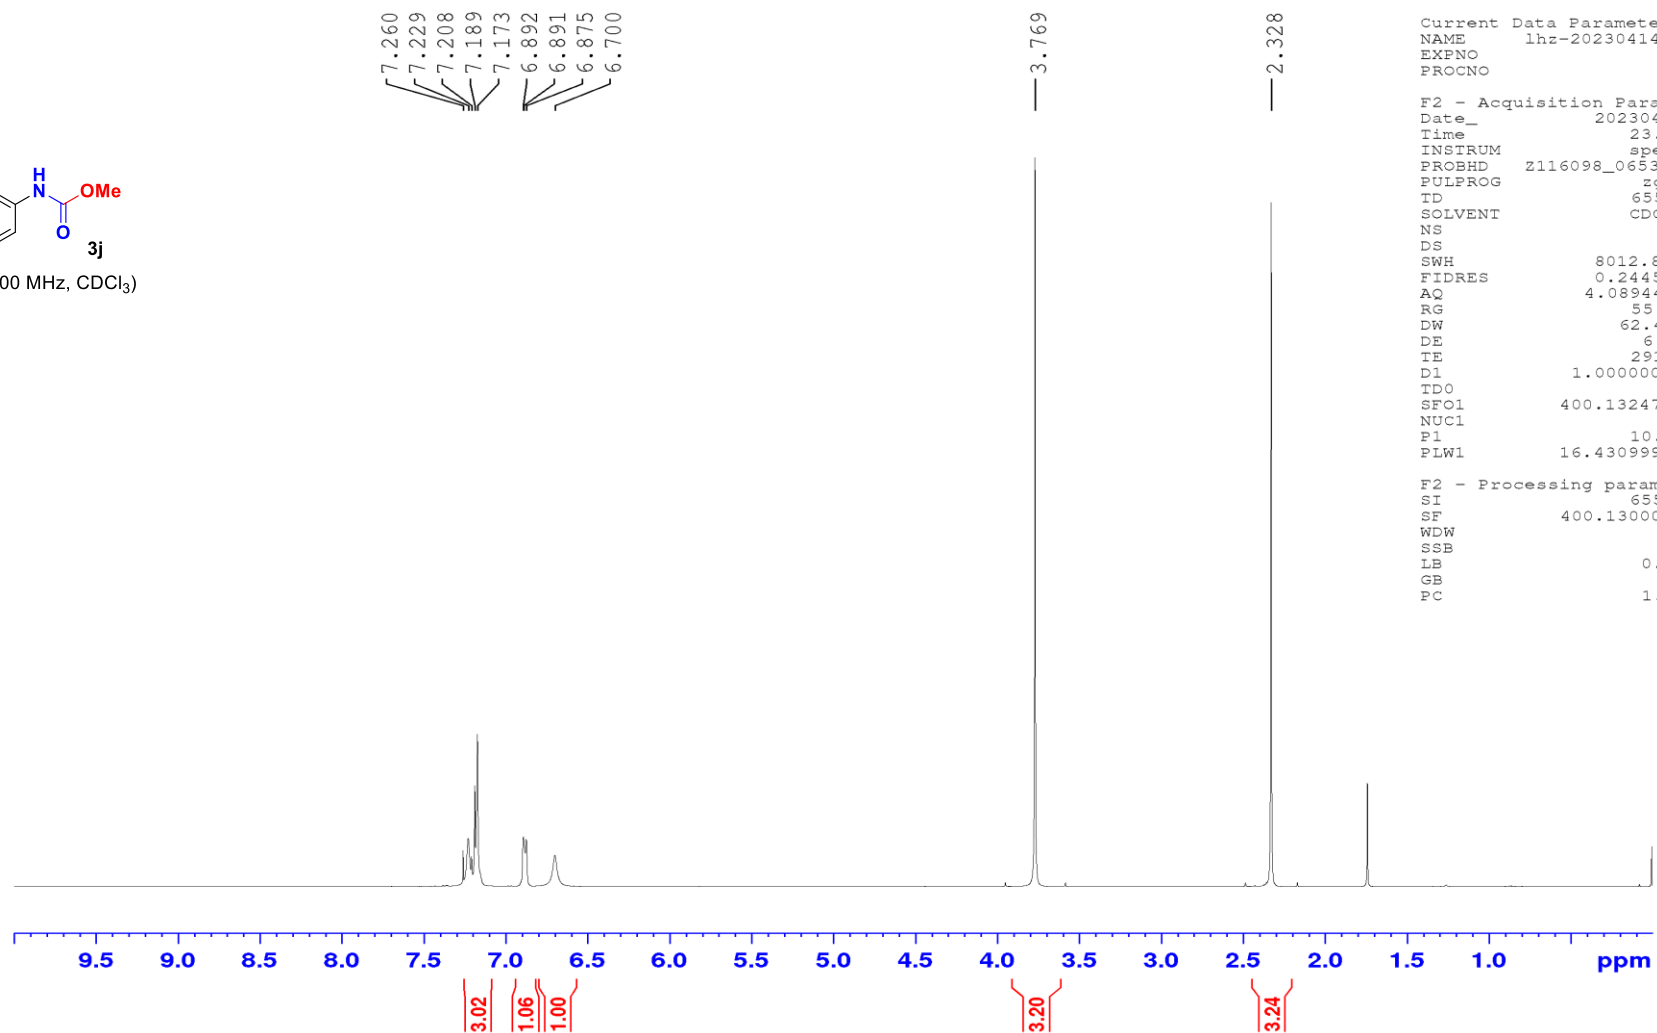

Current Data Parameters  
NAME lhz-20230414-2  
EXPNO 1  
PROCNO 1

F2 - Acquisition Parameters  
Date\_ 20230414  
Time 23.29 h  
INSTRUM spect  
PROBHD Z116098\_0653 (  
PULPROG zg30  
TD 65536  
SOLVENT CDCl3  
NS 16  
DS 2  
SWH 8012.820 Hz  
FIDRES 0.244532 Hz  
AQ 4.0894465 sec  
RG 55.99  
DW 62.400 usec  
DE 6.50 usec  
TE 291.8 K  
D1 1.00000000 sec  
TD0 1  
SFO1 400.1324708 MHz  
NUC1 1H  
P1 10.00 usec  
PLW1 16.43099976 W

F2 - Processing parameters  
SI 65536  
SF 400.1300098 MHz  
WDW EM  
SSB 0  
LB 0.30 Hz  
GB 0  
PC 1.00

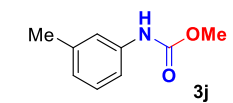

<sup>13</sup>C NMR (100 MHz, CDCl<sub>3</sub>)

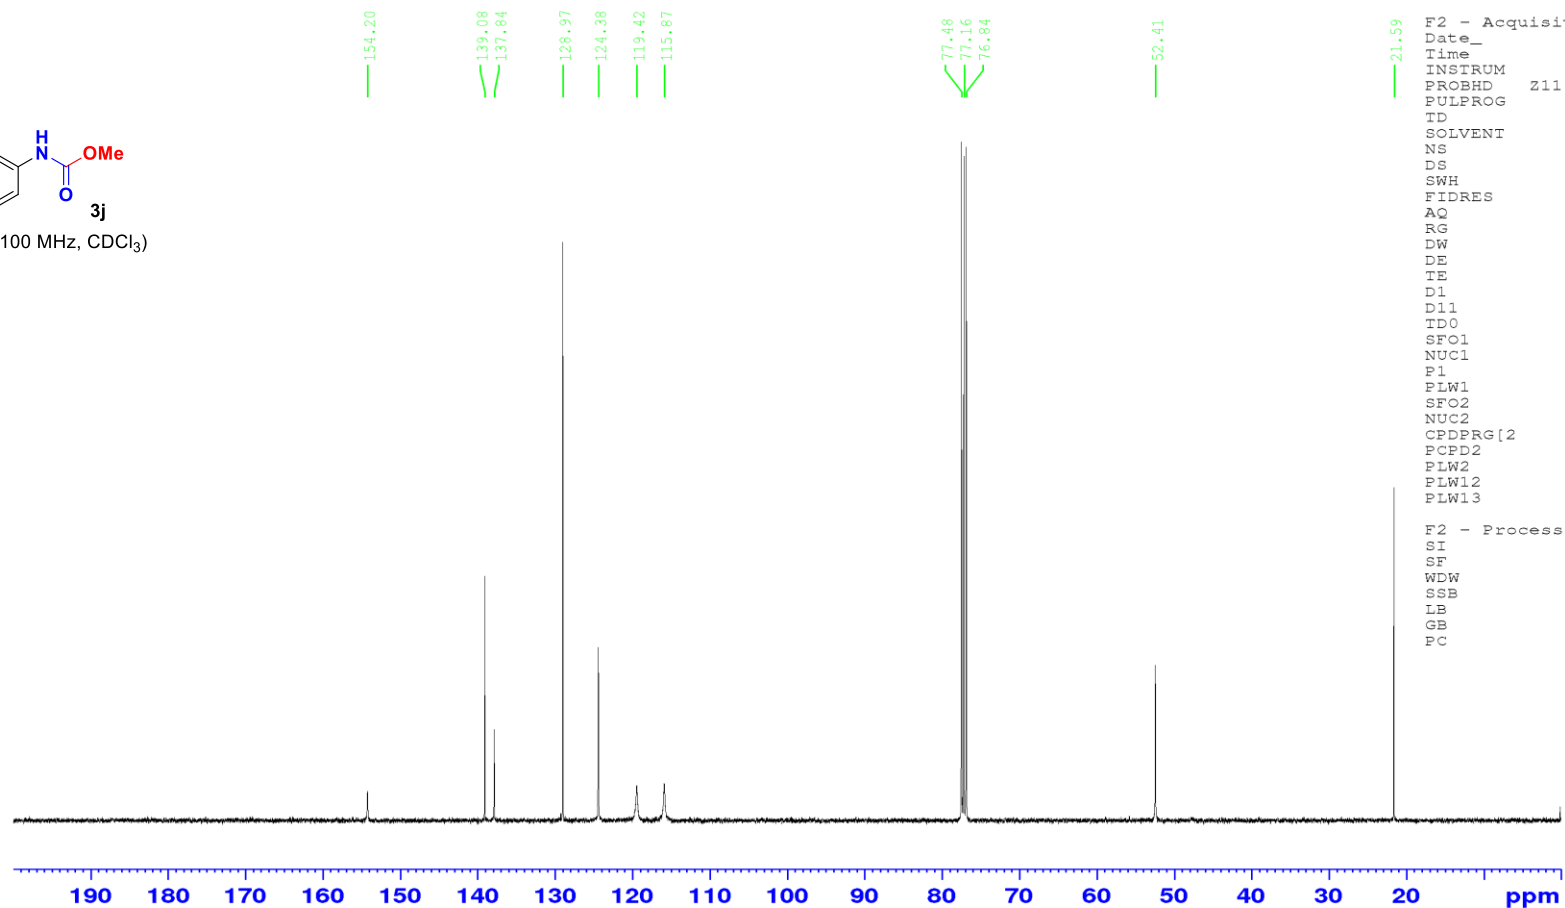

Current Data Parameters  
 NAME lhz-20230414-2  
 EXPNO 2  
 PROCNO 1

F2 - Acquisition Parameters  
 Date\_ 20230415  
 Time 0.29 h  
 INSTRUM spect  
 PROBHD Z116098\_0653 (  
 PULPROG zgpg30  
 ID 65536  
 SOLVENT CDCl3  
 NS 1024  
 DS 4  
 SWH 24038.461 Hz  
 FIDRES 0.733596 Hz  
 AQ 1.3631488 sec  
 RG 198.36  
 DW 20.800 usec  
 DE 6.50 usec  
 TE 292.5 K  
 D1 2.00000000 sec  
 D11 0.03000000 sec  
 TD0 1  
 SFO1 100.6228298 MHz  
 NUC1 13C  
 P1 10.00 usec  
 PLW1 75.84400177 W  
 SFO2 400.1316005 MHz  
 NUC2 1H  
 CPDPRG[2] waltz16  
 PCPD2 90.00 usec  
 PLW2 16.43099976 W  
 PLW12 0.20286000 W  
 PLW13 0.10204000 W

F2 - Processing parameters  
 SI 32768  
 SF 100.6127608 MHz  
 WDW EM  
 SSB 0  
 LB 1.00 Hz  
 GB 0  
 FC 1.40

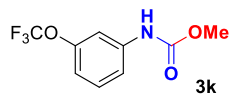

<sup>1</sup>H NMR (400 MHz, CDCl<sub>3</sub>)

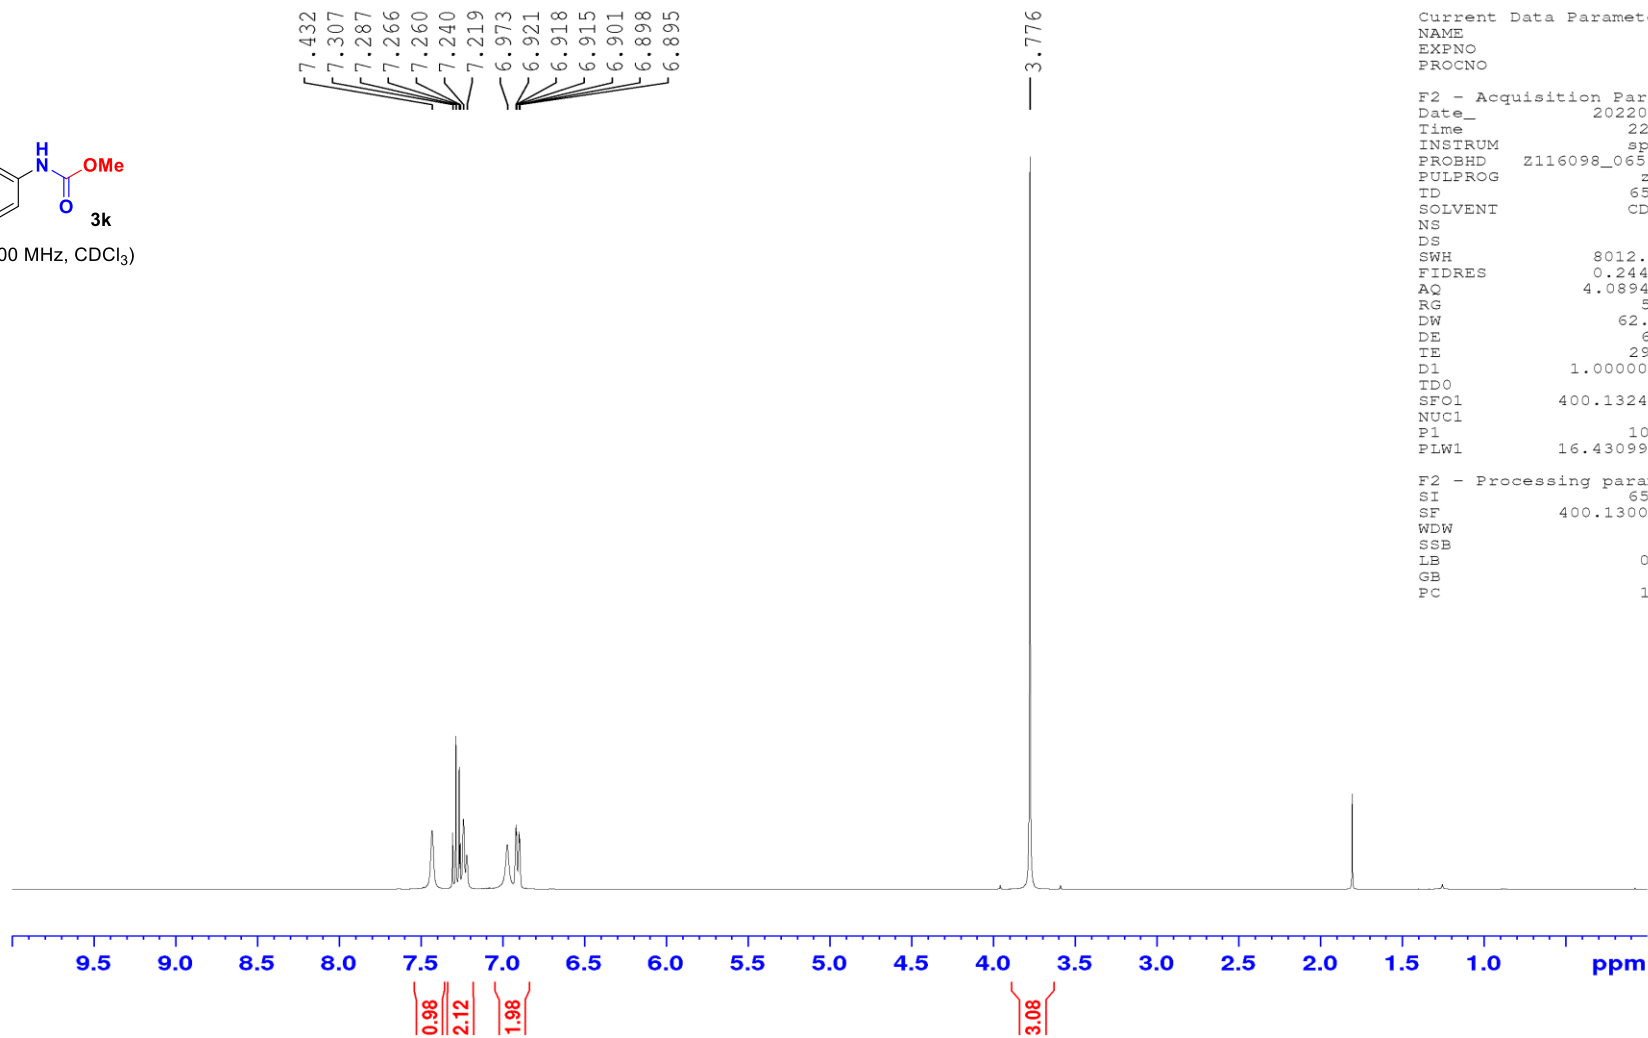

Current Data Parameters  
 NAME S12  
 EXPNO 1  
 PROCNO 1

F2 - Acquisition Parameters  
 Date\_ 20220922  
 Time 22.29 h  
 INSTRUM spect  
 PROBHD Z116098\_0653 (  
 PULPROG zg30  
 TD 65536  
 SOLVENT CDCl3  
 NS 8  
 DS 2  
 SWH 8012.820 Hz  
 FIDRES 0.244532 Hz  
 AQ 4.0894465 sec  
 RG 50.3  
 DW 62.400 usec  
 DE 6.50 usec  
 TE 294.4 K  
 D1 1.00000000 sec  
 TD0 1  
 SFO1 400.1324708 MHz  
 NUC1 1H  
 P1 10.00 usec  
 PLW1 16.43099976 W

F2 - Processing parameters  
 SI 65536  
 SF 400.1300098 MHz  
 WDW EM  
 SSB 0  
 LB 0.30 Hz  
 GB 0  
 PC 1.00

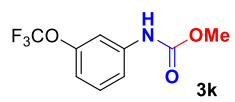

<sup>13</sup>C NMR (100 MHz, CDCl<sub>3</sub>)

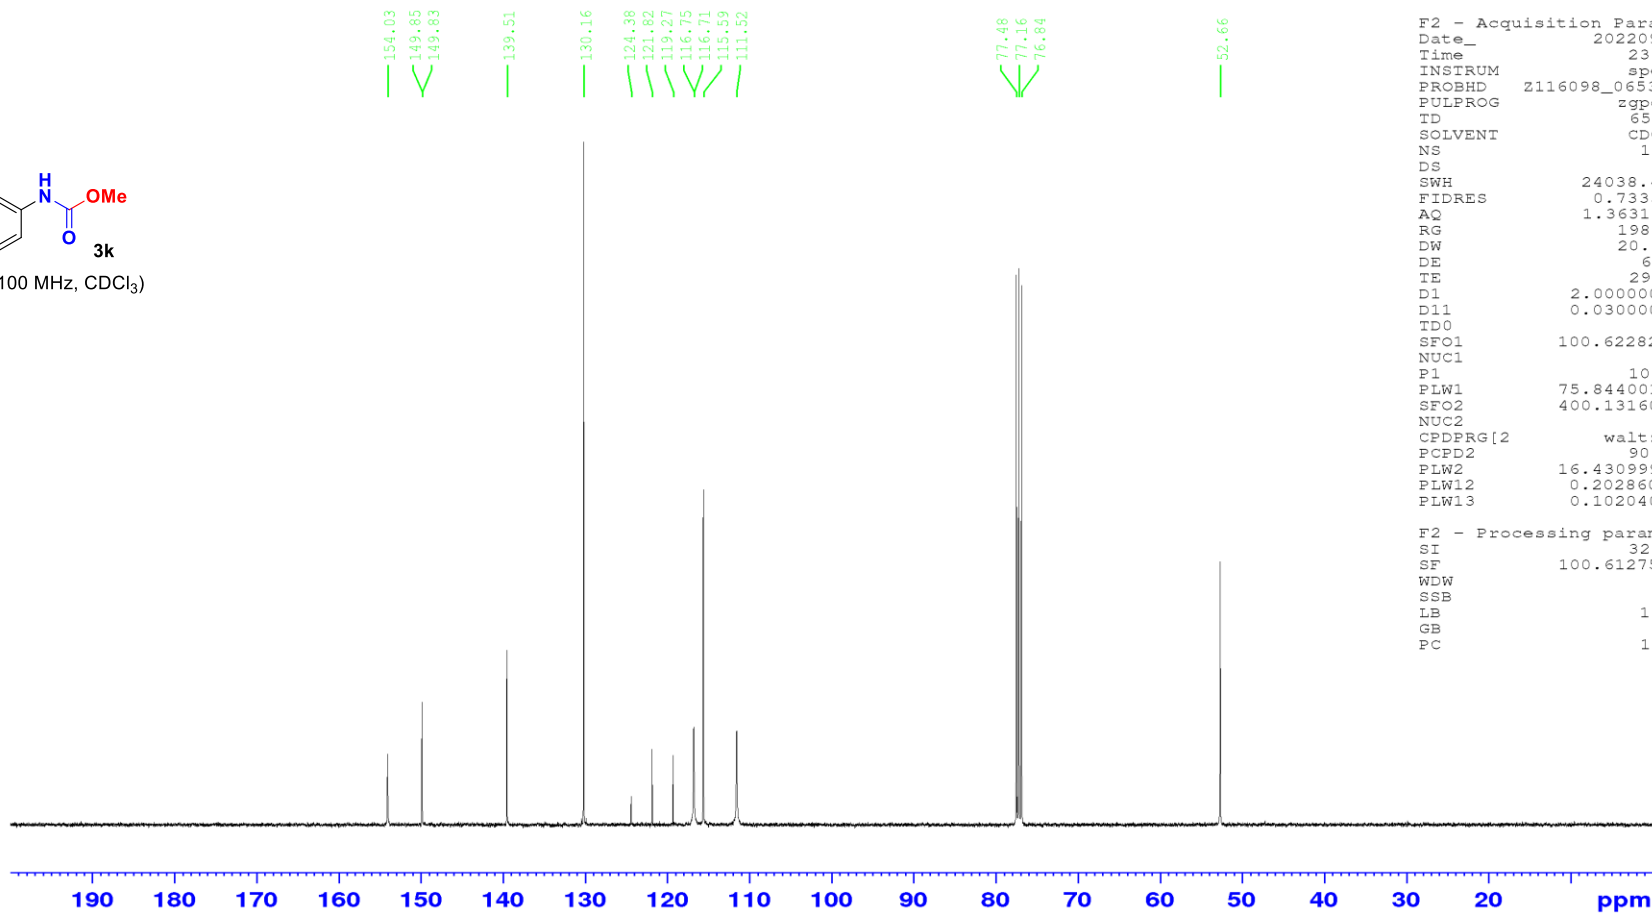

Current Data Parameters  
 NAME S12  
 EXPNO 2  
 PROCNO 1

F2 - Acquisition Parameters  
 Date\_ 20220922  
 Time 23.47 h  
 INSTRUM spect  
 PROBHD Z116098\_0653 (  
 PULPROG zgpg30  
 TD 65536  
 SOLVENT CDCl3  
 NS 1333  
 DS 4  
 SWH 24038.461 Hz  
 FIDRES 0.733596 Hz  
 AQ 1.3631488 sec  
 RG 198.36  
 DW 20.800 usec  
 DE 6.50 usec  
 TE 294.9 K  
 D1 2.00000000 sec  
 D11 0.03000000 sec  
 TD0 1  
 SFO1 100.6228298 MHz  
 NUC1 13C  
 P1 10.00 usec  
 PLW1 75.84400177 W  
 SFO2 400.1316005 MHz  
 NUC2 1H  
 CPDPRG[2] waltz16  
 FCPD2 90.00 usec  
 PLW2 16.43099976 W  
 PLW12 0.20286000 W  
 PLW13 0.10204000 W

F2 - Processing parameters  
 SI 32768  
 SF 100.6127571 MHz  
 WDW EM  
 SSB 0  
 LB 1.00 Hz  
 GB 0  
 PC 1.40



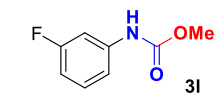

<sup>1</sup>H NMR (400 MHz, CDCl<sub>3</sub>)

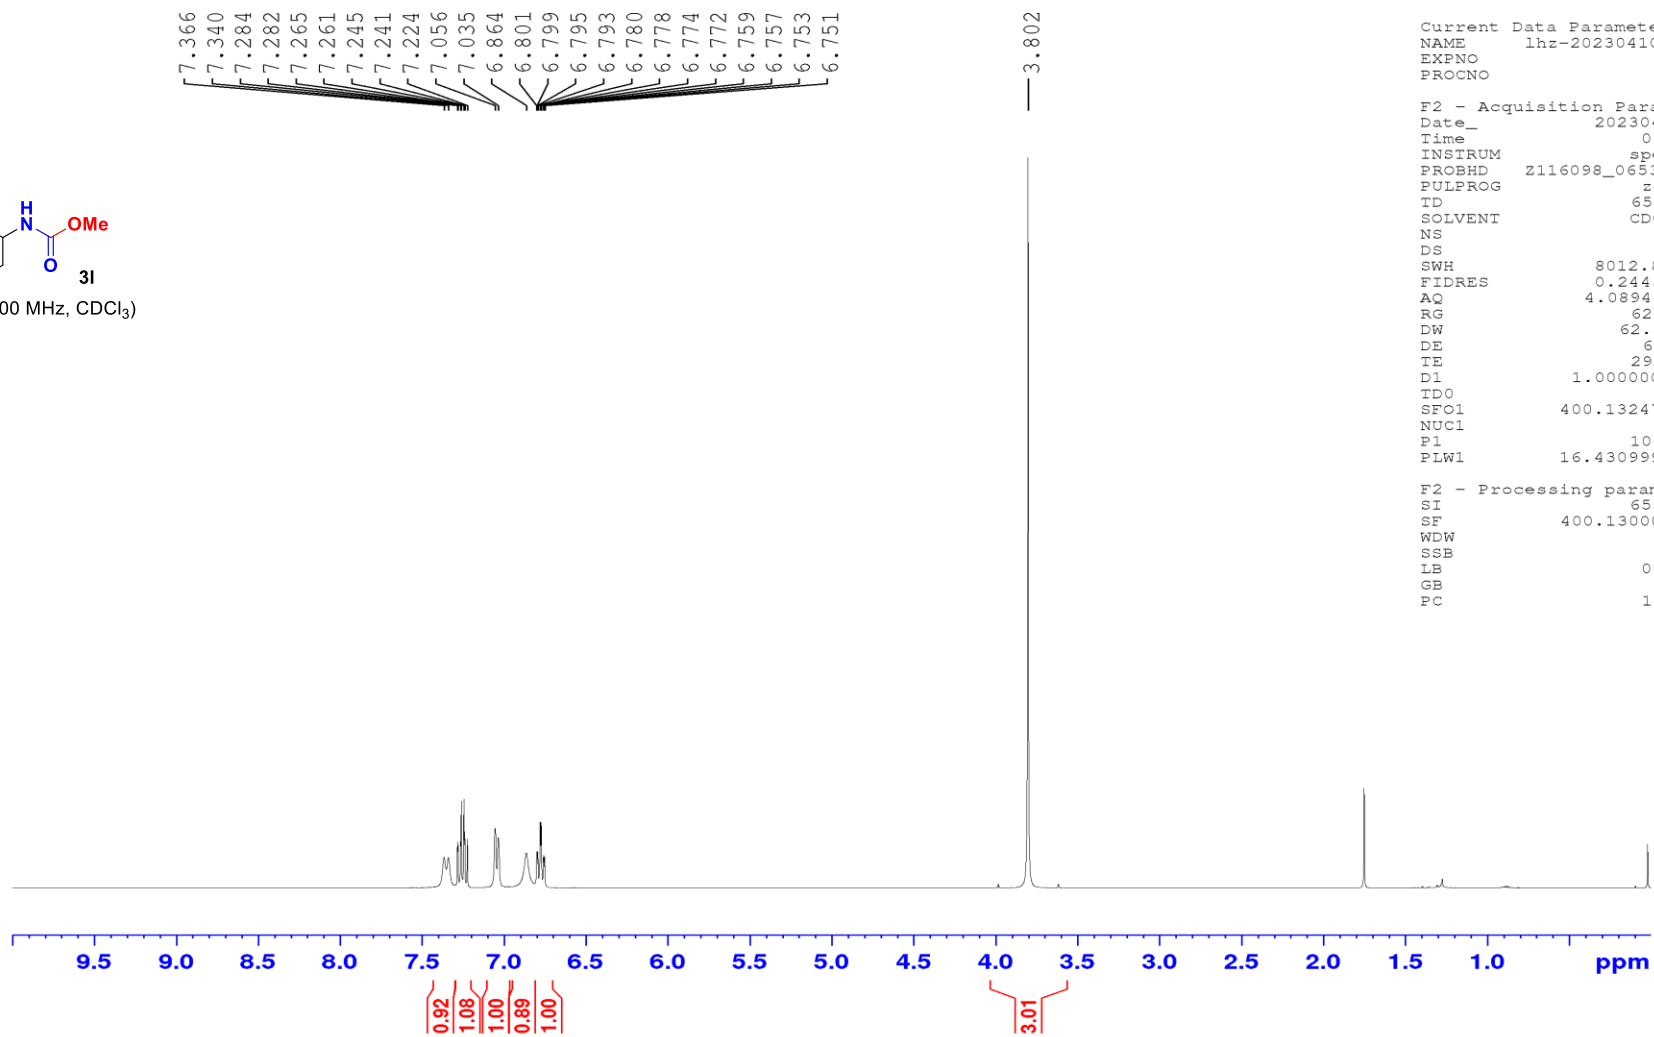

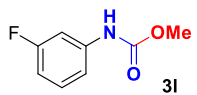

<sup>13</sup>C NMR (100 MHz, CDCl<sub>3</sub>)

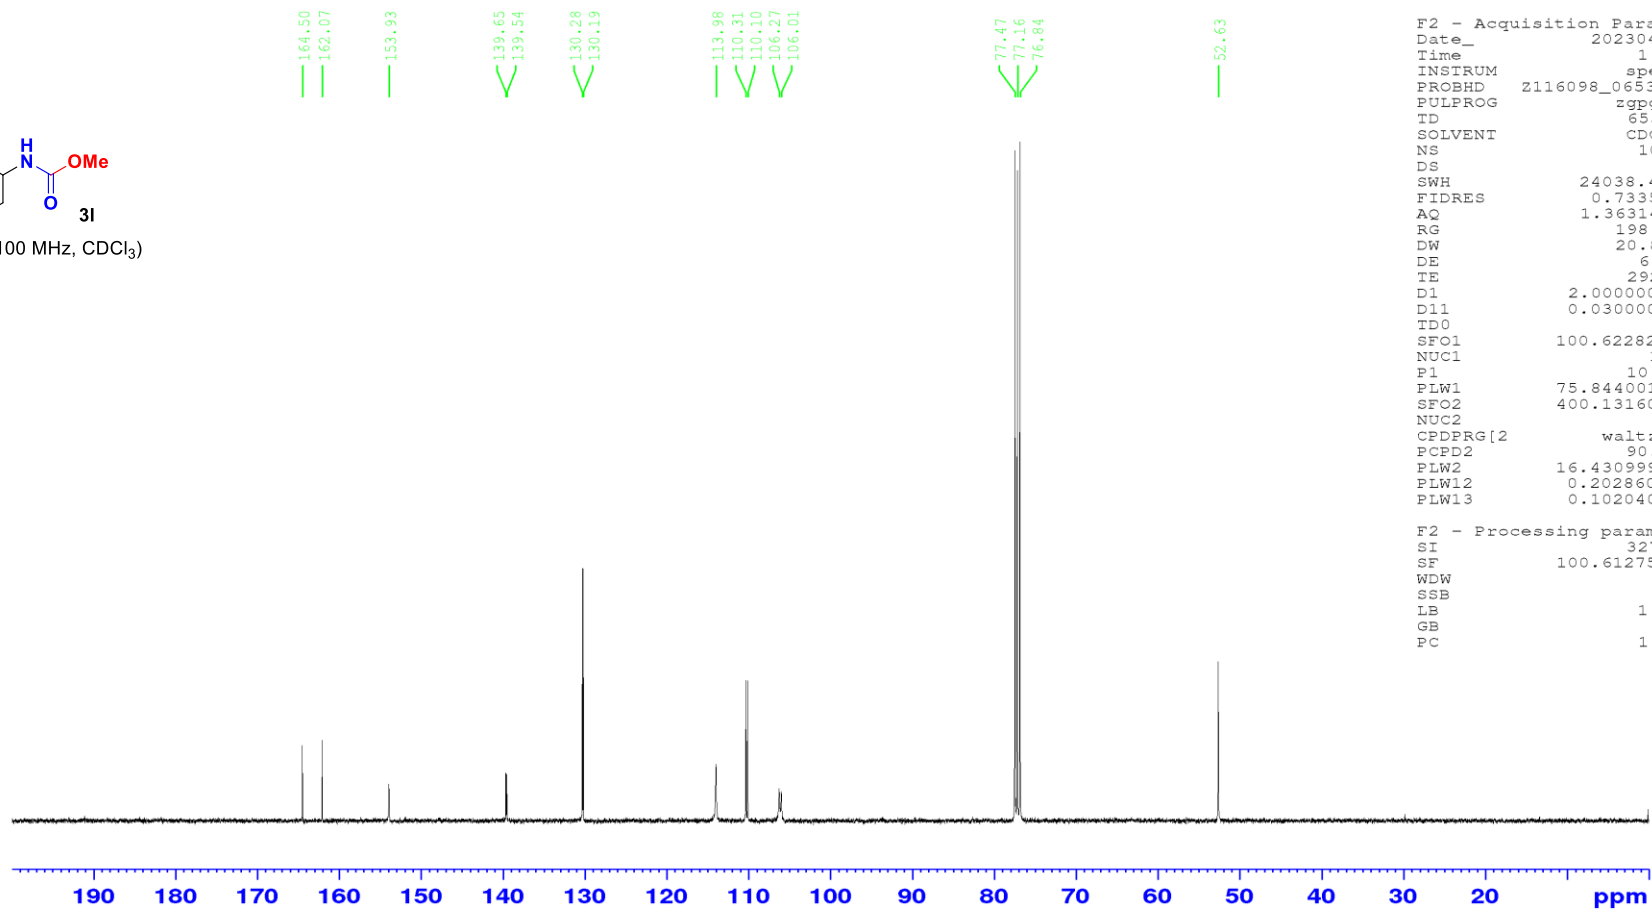

Current Data Parameters  
 NAME lhz-20230410-4  
 EXPNO 2  
 PROCNO 1

F2 - Acquisition Parameters  
 Date\_ 20230411  
 Time 1.40 h  
 INSTRUM spect  
 PROBHD Z116098\_0653 (  
 PULPROG zgpg30  
 TD 65536  
 SOLVENT CDCl3  
 NS 1024  
 DS 4  
 SWH 24038.461 Hz  
 FIDRES 0.733596 Hz  
 AQ 1.3631488 sec  
 RG 198.36  
 DW 20.800 usec  
 DE 6.50 usec  
 TE 292.6 K  
 D1 2.00000000 sec  
 D11 0.03000000 sec  
 TD0 1  
 SFO1 100.6228298 MHz  
 NUC1 13C  
 P1 10.00 usec  
 PLW1 75.84400177 W  
 SFO2 400.1316005 MHz  
 NUC2 1H  
 CPDPRG[2] waltz16  
 FCPD2 90.00 usec  
 PLW2 16.43099976 W  
 PLW12 0.20286000 W  
 PLW13 0.10204000 W

F2 - Processing parameters  
 SI 32768  
 SF 100.6127592 MHz  
 WDW EM  
 SSB 0  
 LB 1.00 Hz  
 GB 0  
 FC 1.40

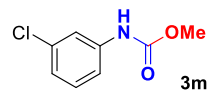

<sup>1</sup>H NMR (400 MHz, CDCl<sub>3</sub>)

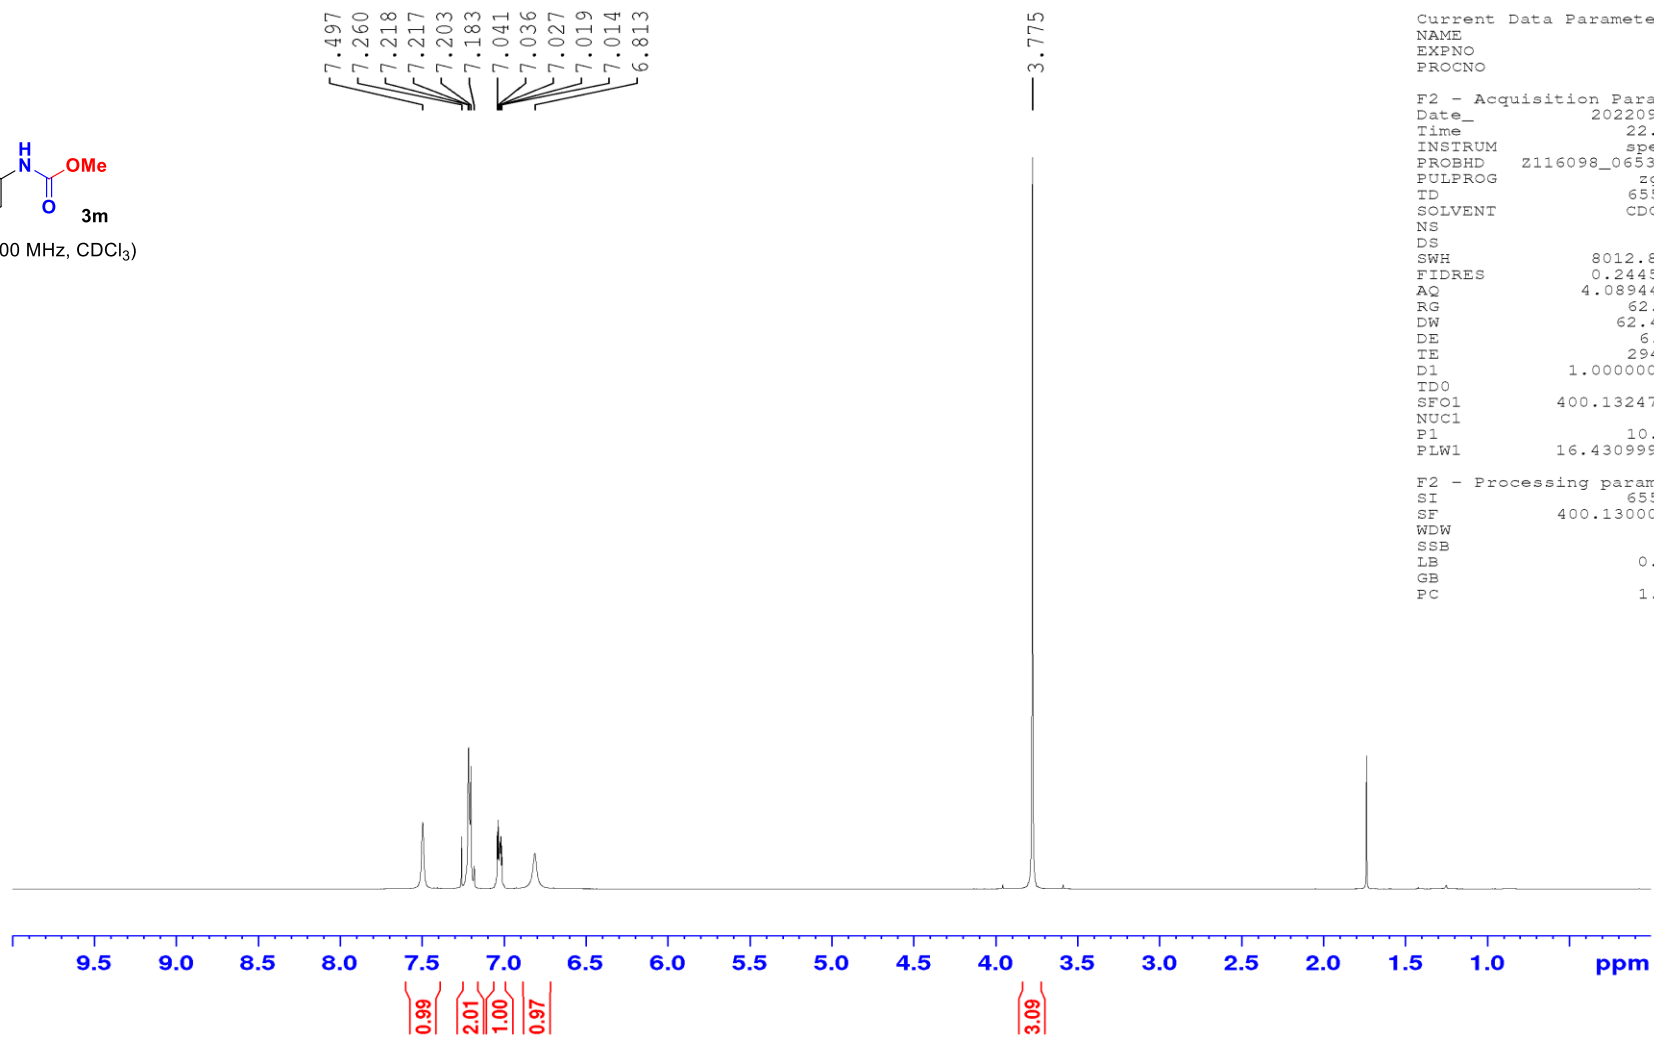

Current Data Parameters  
NAME S3  
EXPNO 1  
PROCNO 1

F2 - Acquisition Parameters  
Date\_ 20220923  
Time 22.22 h  
INSTRUM spect  
PROBHD Z116098\_0653 (  
PULPROG zg30  
TD 65536  
SOLVENT CDCl3  
NS 8  
DS 2  
SWH 8012.820 Hz  
FIDRES 0.244532 Hz  
AQ 4.0894465 sec  
RG 62.98  
DW 62.400 usec  
DE 6.50 usec  
TE 294.1 K  
D1 1.00000000 sec  
TD0 1  
SF01 400.1324708 MHz  
NUC1 1H  
P1 10.00 usec  
PLW1 16.43099976 W

F2 - Processing parameters  
SI 65536  
SF 400.1300098 MHz  
WDW EM  
SSB 0  
LB 0.30 Hz  
GB 0  
PC 1.00

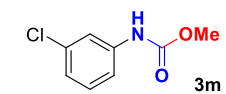

<sup>13</sup>C NMR (100 MHz, CDCl<sub>3</sub>)

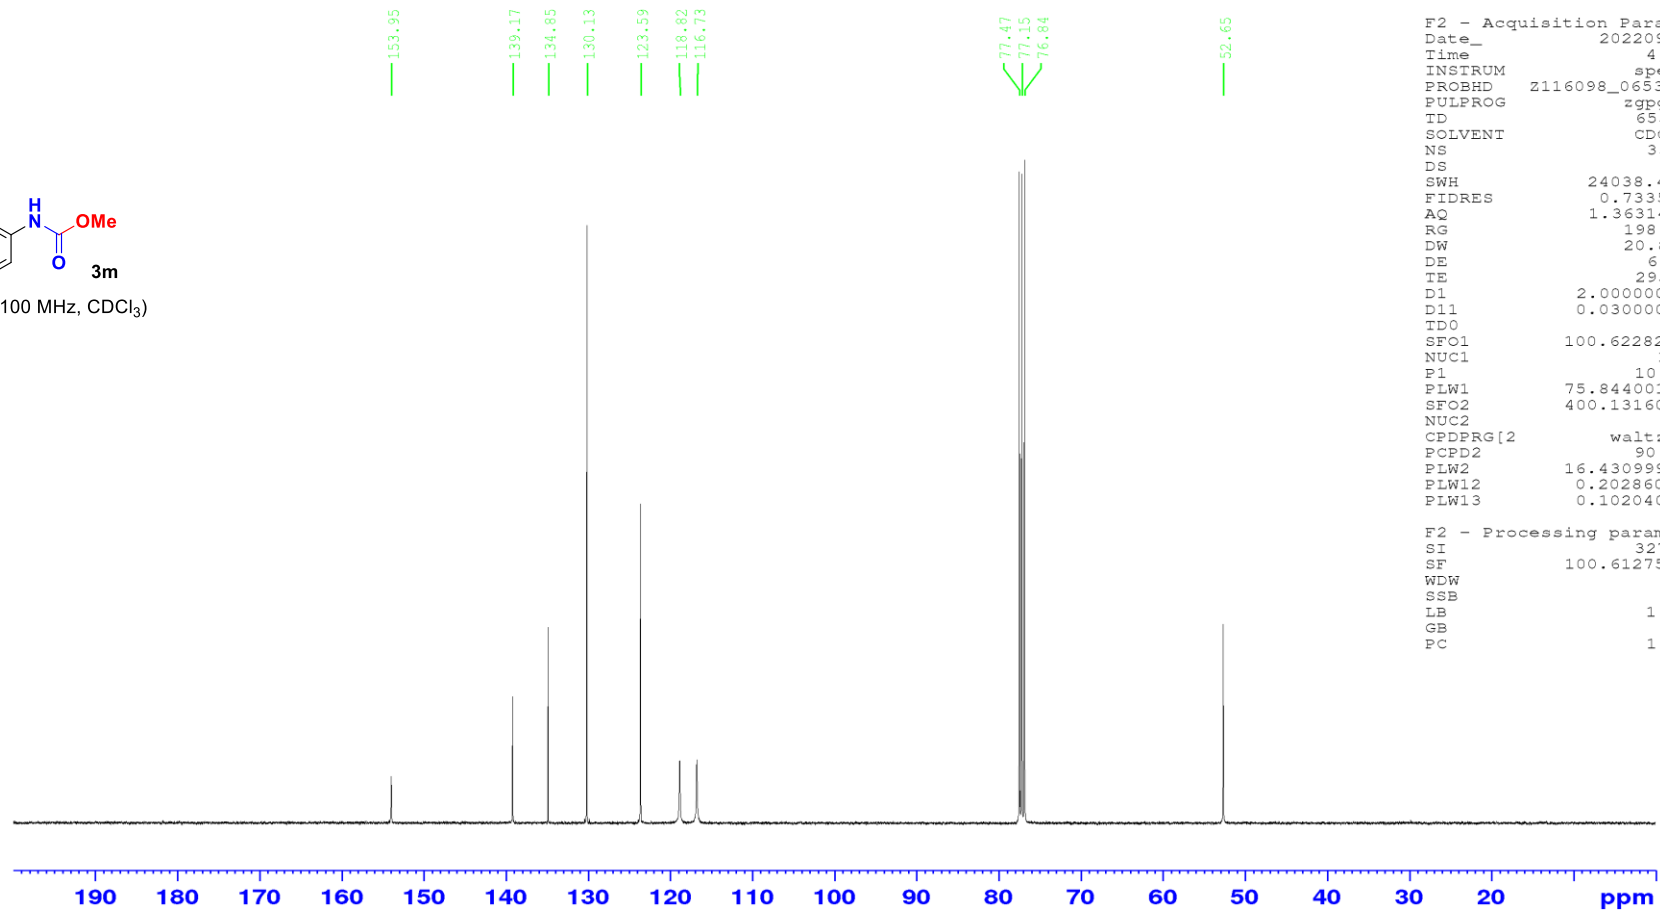

Current Data Parameters  
NAME S3  
EXPNO 2  
PROCNO 1

F2 - Acquisition Parameters  
Date\_ 20220924  
Time 4.51 h  
INSTRUM spect  
PROBHD Z116098\_0653 (  
PULPROG zgpg30  
TD 65536  
SOLVENT CDCl3  
NS 3333  
DS 4  
SWH 24038.461 Hz  
FIDRES 0.733596 Hz  
AQ 1.3631488 sec  
RG 198.36  
DW 20.800 usec  
DE 6.50 usec  
TE 295.2 K  
D1 2.00000000 sec  
D11 0.03000000 sec  
TD0 1  
SFO1 100.6228298 MHz  
NUC1 13C  
P1 10.00 usec  
PLW1 75.84400177 W  
SFO2 400.1316005 MHz  
NUC2 1H  
CPDPRG[2] waltz16  
PCPD2 90.00 usec  
PLW2 16.43099976 W  
PLW12 0.20286000 W  
PLW13 0.10204000 W

F2 - Processing parameters  
SI 32768  
SF 100.6127594 MHz  
WDW EM  
SSB 0  
LB 1.00 Hz  
GB 0  
PC 1.40

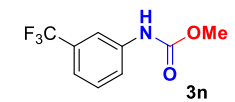

<sup>1</sup>H NMR (400 MHz, CDCl<sub>3</sub>)

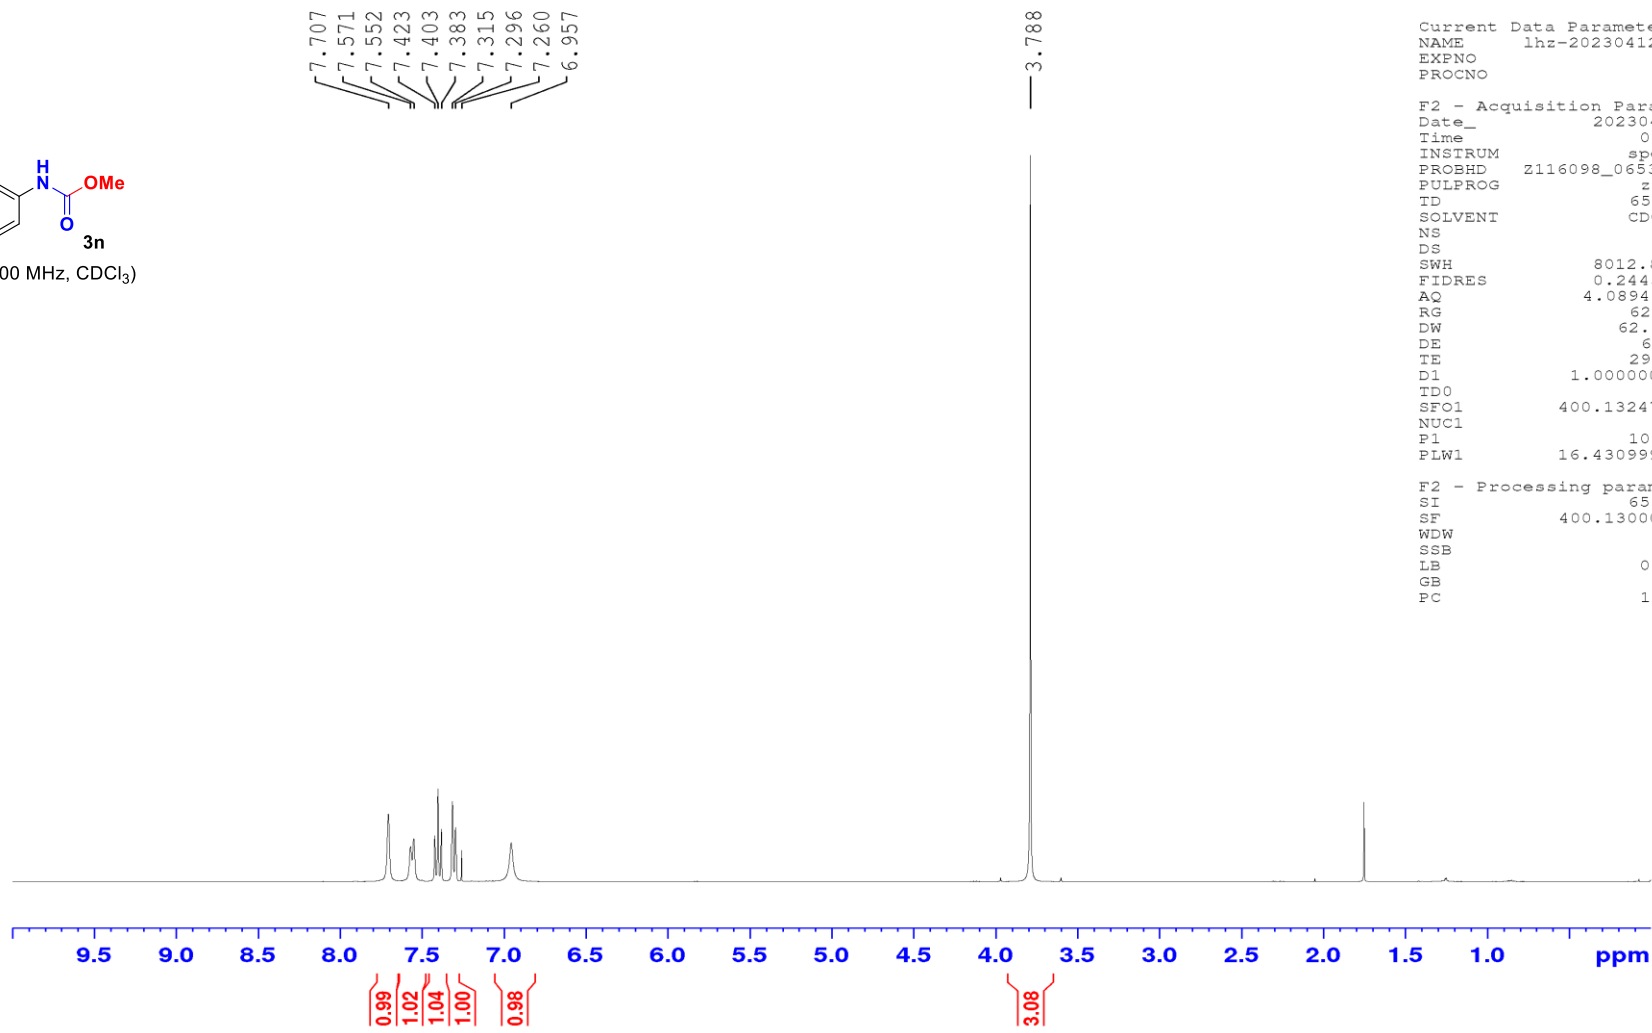

Current Data Parameters  
NAME lhz-20230412-3  
EXPNO 1  
PROCNO 1

F2 - Acquisition Parameters  
Date\_ 20230413  
Time 0.38 h  
INSTRUM spect  
PROBHD Z116098\_0653 (  
PULPROG zg30  
TD 65536  
SOLVENT CDCl3  
NS 16  
DS 2  
SWH 8012.820 Hz  
FIDRES 0.244532 Hz  
AQ 4.0894465 sec  
RG 62.98  
DW 62.400 usec  
DE 6.50 usec  
TE 292.2 K  
D1 1.00000000 sec  
TD0 1  
SFO1 400.1324708 MHz  
NUC1 1H  
P1 10.00 usec  
PLW1 16.43099976 W

F2 - Processing parameters  
SI 65536  
SF 400.1300098 MHz  
WDW EM  
SSB 0  
LB 0.30 Hz  
GB 0  
PC 1.00

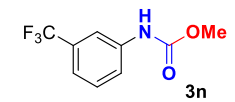

<sup>13</sup>C NMR (100 MHz, CDCl<sub>3</sub>)

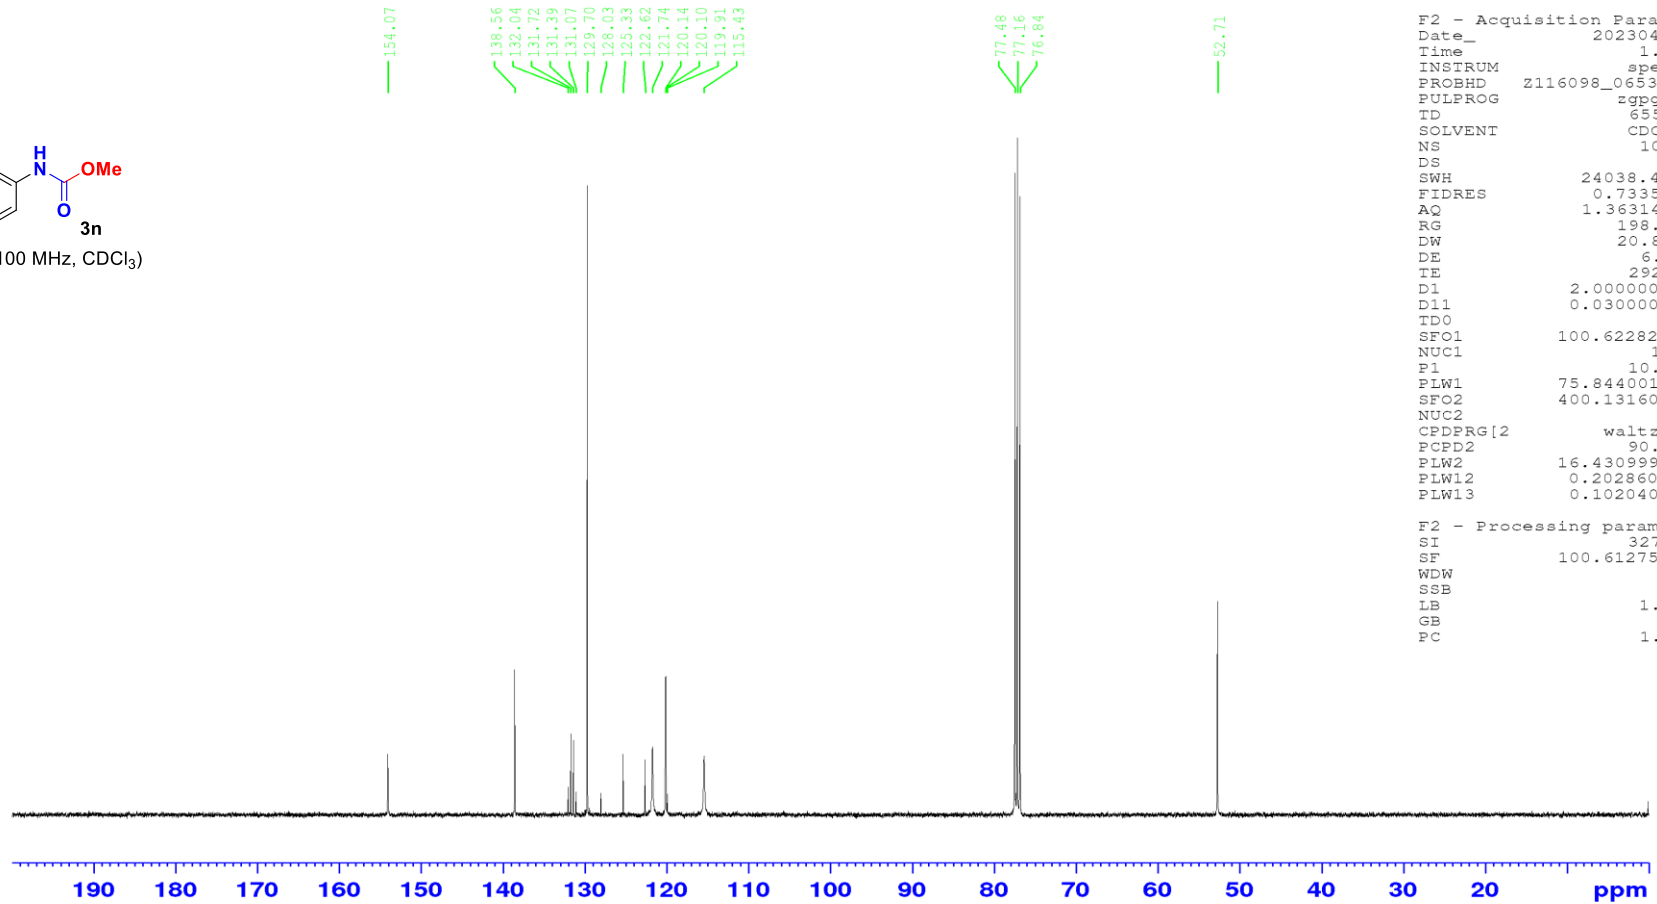

Current Data Parameters  
 NAME lhz-20230412-3  
 EXPNO 2  
 PROCNO 1

F2 - Acquisition Parameters  
 Date\_ 20230413  
 Time 1.38 h  
 INSTRUM spect  
 PROBHD z116098\_0653 (  
 PULPROG zgpg30  
 TD 65536  
 SOLVENT CDCl3  
 NS 1024  
 DS 4  
 SWH 24038.461 Hz  
 FIDRES 0.733596 Hz  
 AQ 1.3631488 sec  
 RG 198.36  
 DW 20.800 usec  
 DE 6.50 usec  
 TE 292.7 K  
 D1 2.00000000 sec  
 D11 0.03000000 sec  
 TD0 1  
 SFO1 100.6228298 MHz  
 NUC1 13c  
 P1 10.00 usec  
 PLW1 75.84400177 W  
 SFO2 400.1316005 MHz  
 NUC2 1H  
 CPDPRG[2] waltz16  
 FCPD2 90.00 usec  
 PLW2 16.43099976 W  
 PLW12 0.20286000 W  
 PLW13 0.10204000 W

F2 - Processing parameters  
 SI 32768  
 SF 100.6127579 MHz  
 WDW EM  
 SSB 0  
 LB 1.00 Hz  
 GB 0  
 PC 1.40

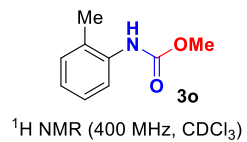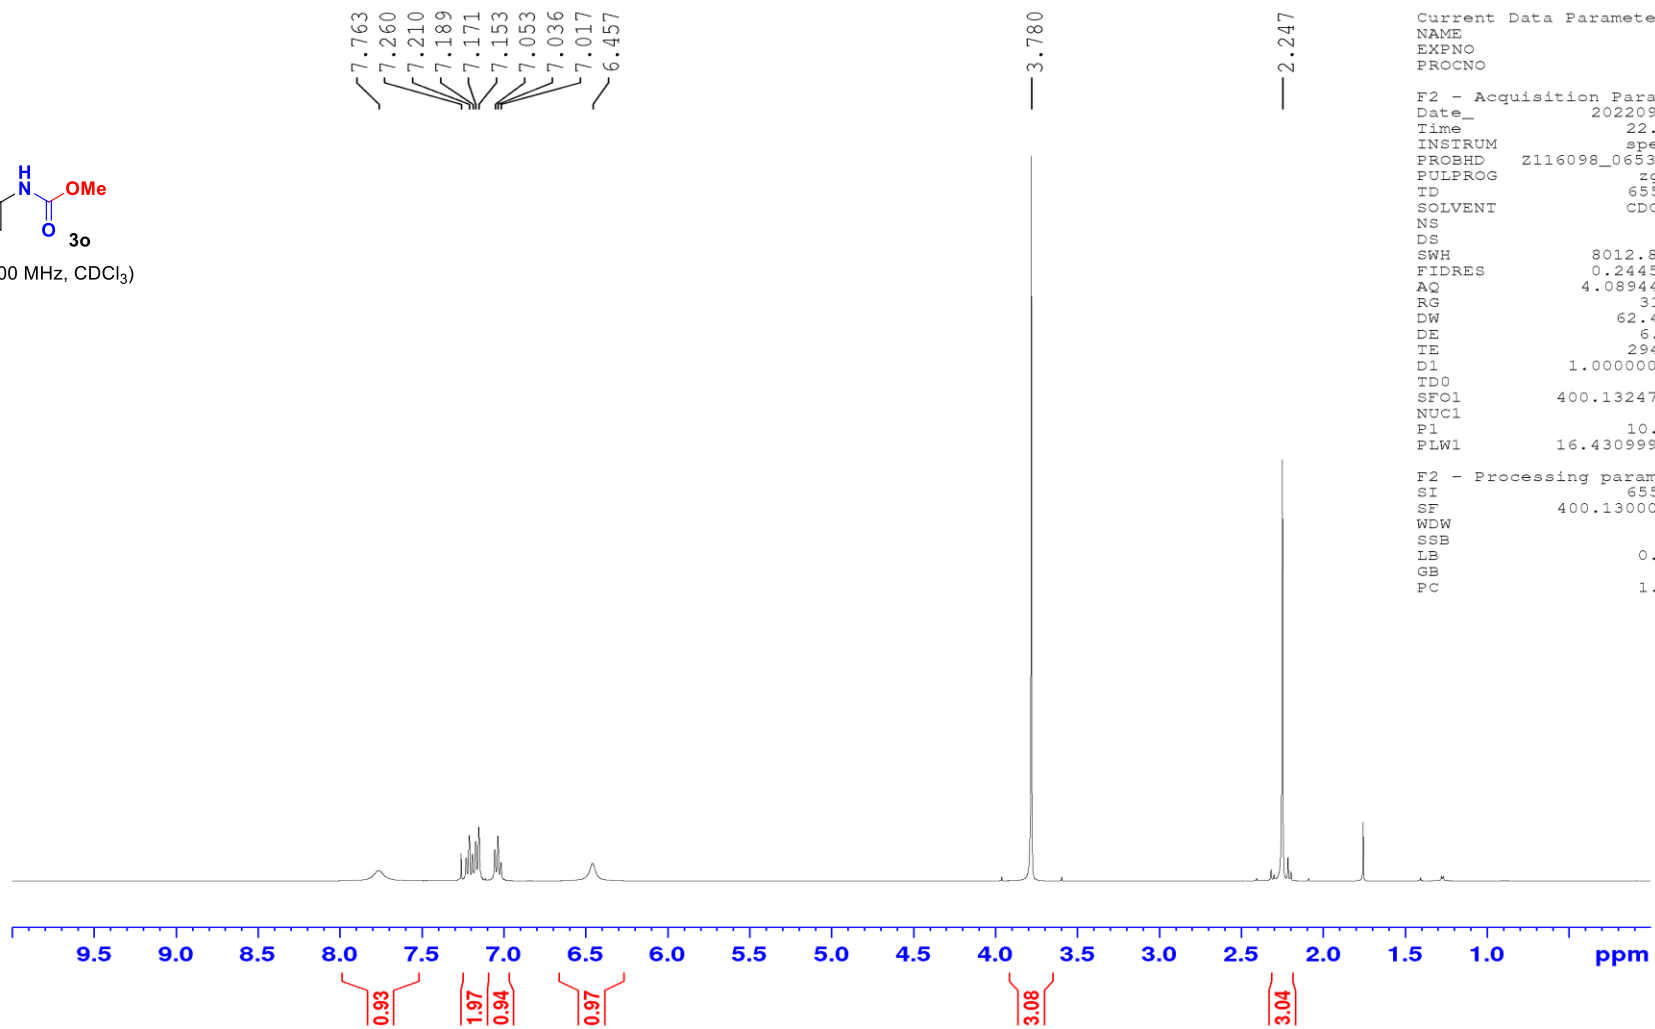

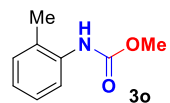

<sup>13</sup>C NMR (100 MHz, CDCl<sub>3</sub>)

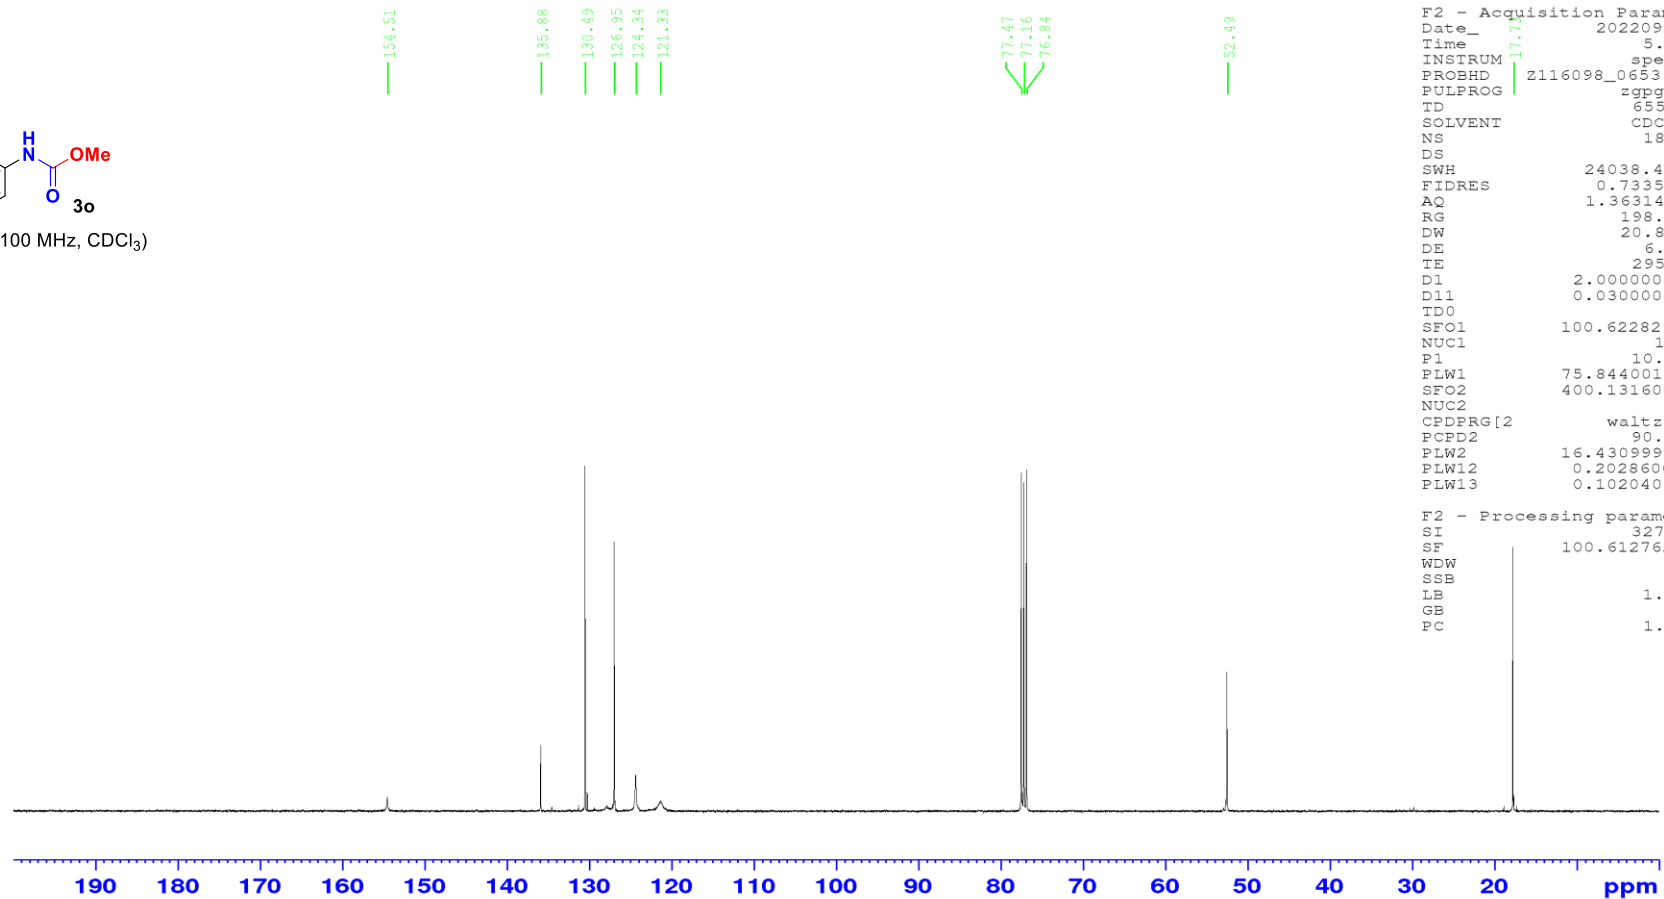

Current Data Parameters  
NAME S8  
EXPNO 2  
PROCNO 1

F2 - Acquisition Parameters  
Date\_ 20220923  
Time 5.20 h  
INSTRUM spect  
PROBHD Z116098\_0653 (  
PULPROG zgpg30  
TD 65536  
SOLVENT CDCl3  
NS 1888  
DS 4  
SWH 24038.461 Hz  
FIDRES 0.733596 Hz  
AQ 1.3631488 sec  
RG 198.36  
DW 20.800 usec  
DE 6.50 usec  
TE 295.2 K  
D1 2.00000000 sec  
D11 0.03000000 sec  
TD0 1  
SFO1 100.6228298 MHz  
NUC1 13C  
P1 10.00 usec  
PLW1 75.84400177 W  
SFO2 400.1316005 MHz  
NUC2 1H  
CPDPRG[2] waltz16  
PCPD2 90.00 usec  
PLW2 16.43099976 W  
PLW12 0.20286000 W  
PLW13 0.10204000 W

F2 - Processing parameters  
SI 32768  
SF 100.6127620 MHz  
WDW EM  
SSB 0  
LB 1.00 Hz  
GB 0  
PC 1.40



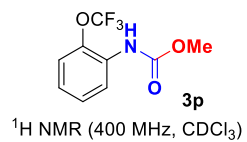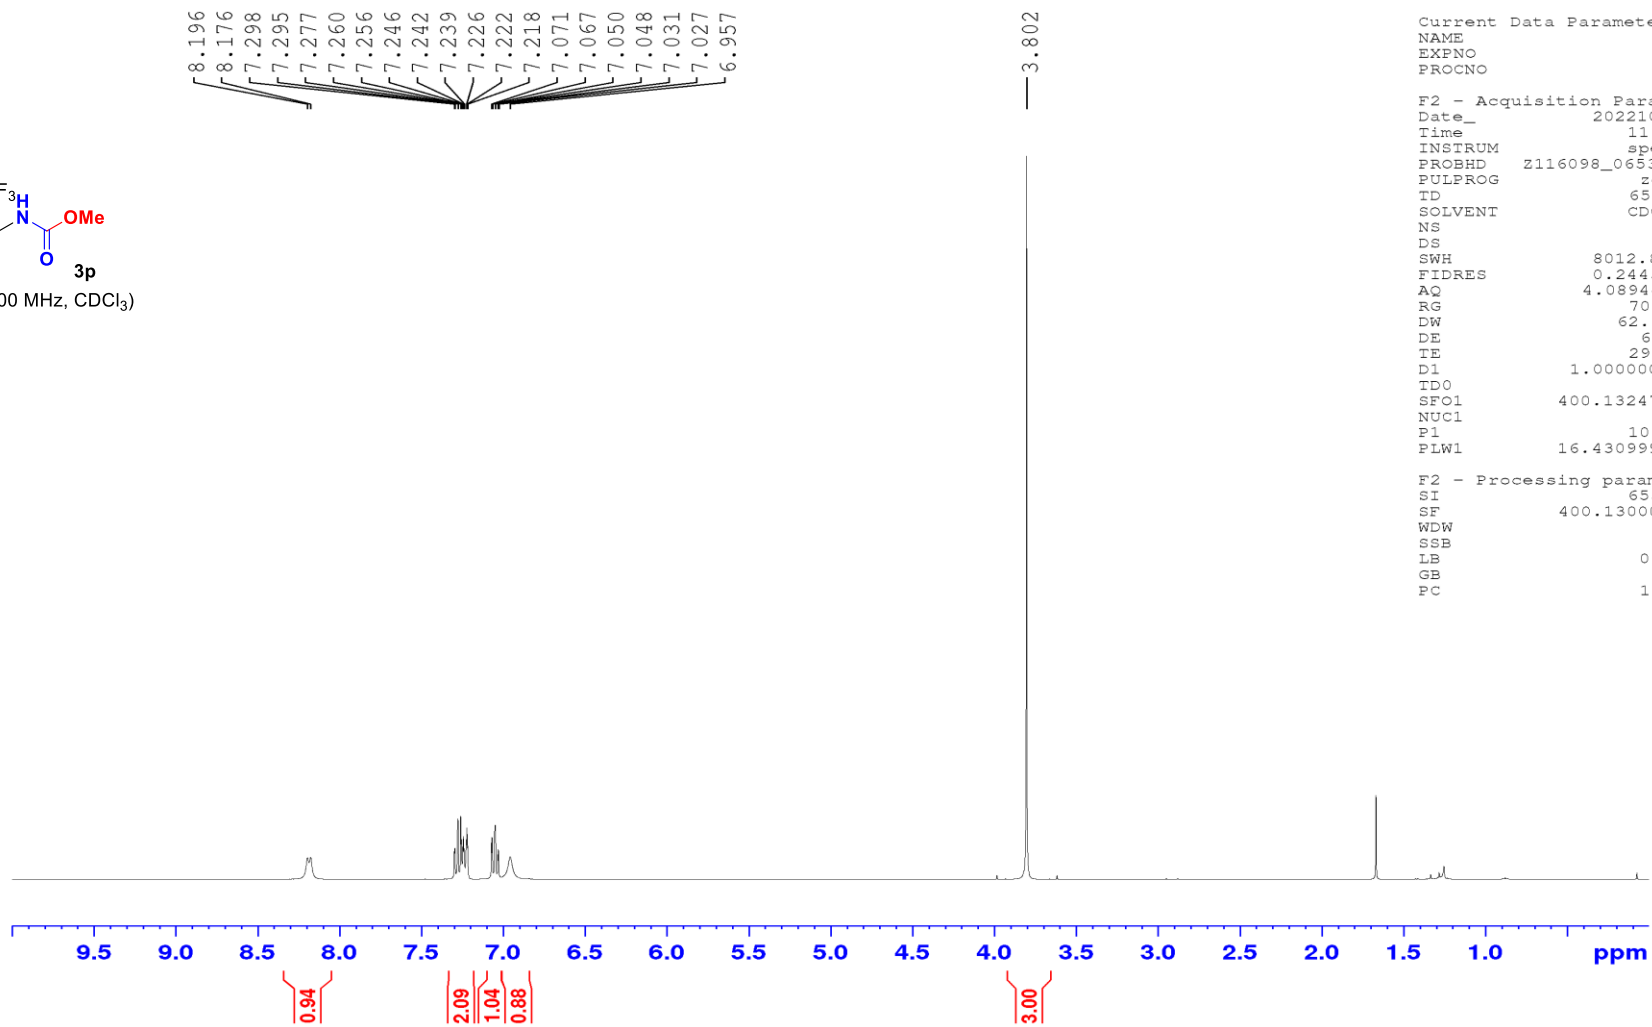

```

Current Data Parameters
NAME                sl1
EXPNO                1
PROCNO              1

F2 - Acquisition Parameters
Date_                20221001
Time_                11.35 h
INSTRUM              spect
PROBHD               Z116098_0653 (
PULPROG              zg30
TD                   65536
SOLVENT              CDCl3
NS                   16
DS                   2
SWH                  8012.820 Hz
FIDRES               0.244532 Hz
AQ                   4.0894465 sec
RG                   70.89
DW                   62.400 usec
DE                   6.50 usec
TE                   294.4 K
D1                   1.00000000 sec
TD0                  1
SFO1                 400.1324708 MHz
NUC1                 1H
P1                   10.00 usec
PLW1                 16.43099976 W

F2 - Processing parameters
SI                   65536
SF                   400.1300098 MHz
WDW                  EM
SSB                   0
LB                   0.30 Hz
GB                   0
PC                   1.00
  
```

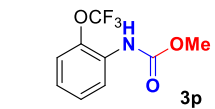

<sup>13</sup>C NMR (100 MHz, CDCl<sub>3</sub>)

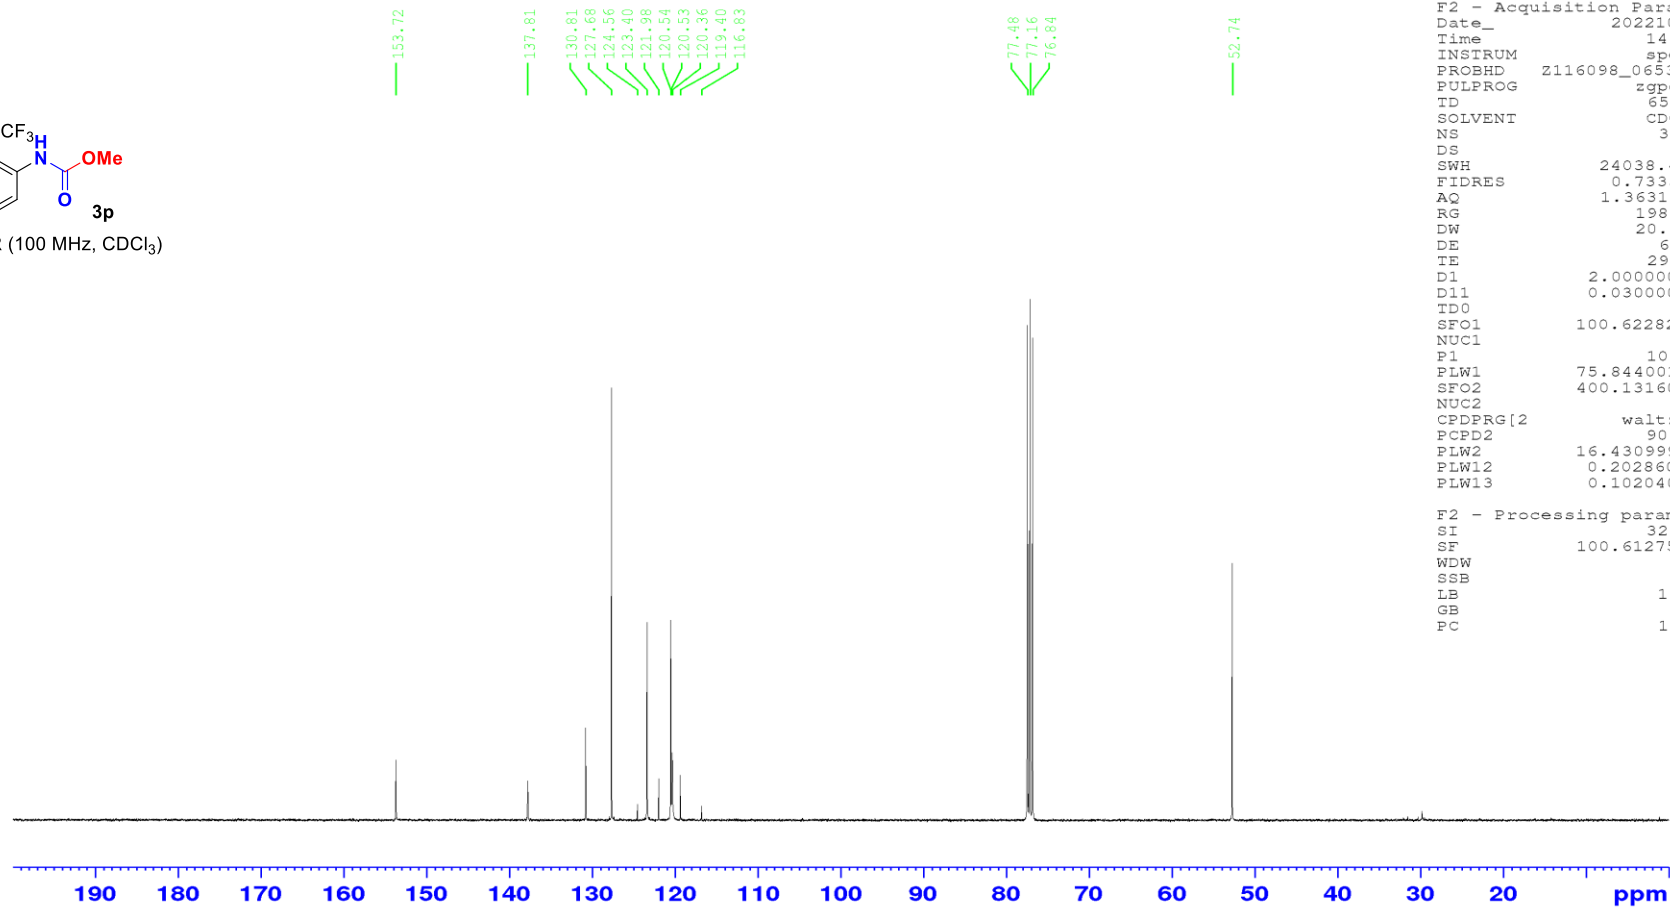

Current Data Parameters  
 NAME S11  
 EXPNO 2  
 PROCNO 1

F2 - Acquisition Parameters  
 Date\_ 20221001  
 Time 14.37 h  
 INSTRUM spect  
 PROBHD Z116098\_0653 (  
 PULPROG zgpg30  
 TD 65536  
 SOLVENT CDCl3  
 NS 3168  
 DS 4  
 SWH 24038.461 Hz  
 FIDRES 0.733596 Hz  
 AQ 1.3631488 sec  
 RG 198.36  
 DW 20.800 usec  
 DE 6.50 usec  
 TE 294.8 K  
 D1 2.00000000 sec  
 D11 0.03000000 sec  
 TD0 1  
 SFO1 100.6228298 MHz  
 NUC1 13C  
 P1 10.00 usec  
 PLW1 75.84400177 W  
 SFO2 400.1316005 MHz  
 NUC2 1H  
 CPDPRG[2] waltz16  
 PCPD2 90.00 usec  
 PLW2 16.43099976 W  
 PLW12 0.20286000 W  
 PLW13 0.10204000 W

F2 - Processing parameters  
 SI 32768  
 SF 100.6127564 MHz  
 WDW EM  
 SSB 0  
 LB 1.00 Hz  
 GB 0  
 FC 1.40

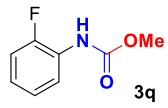

<sup>1</sup>H NMR (400 MHz, CDCl<sub>3</sub>)

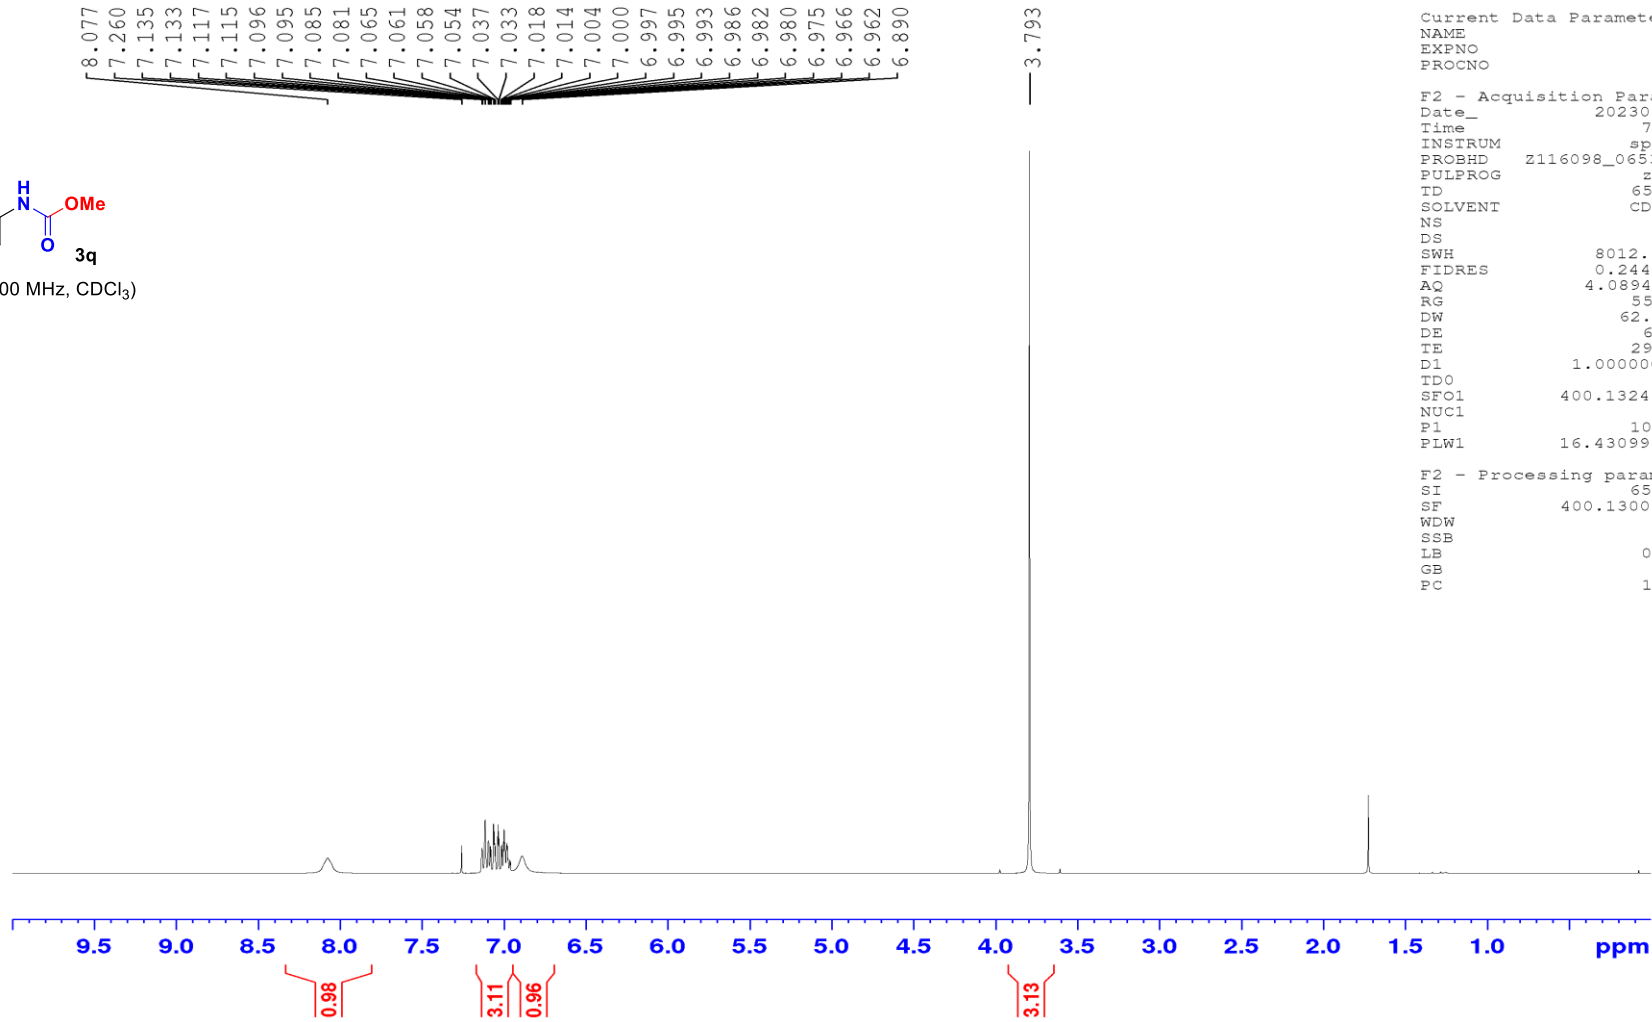

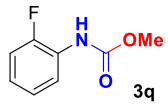

<sup>13</sup>C NMR (100 MHz, CDCl<sub>3</sub>)

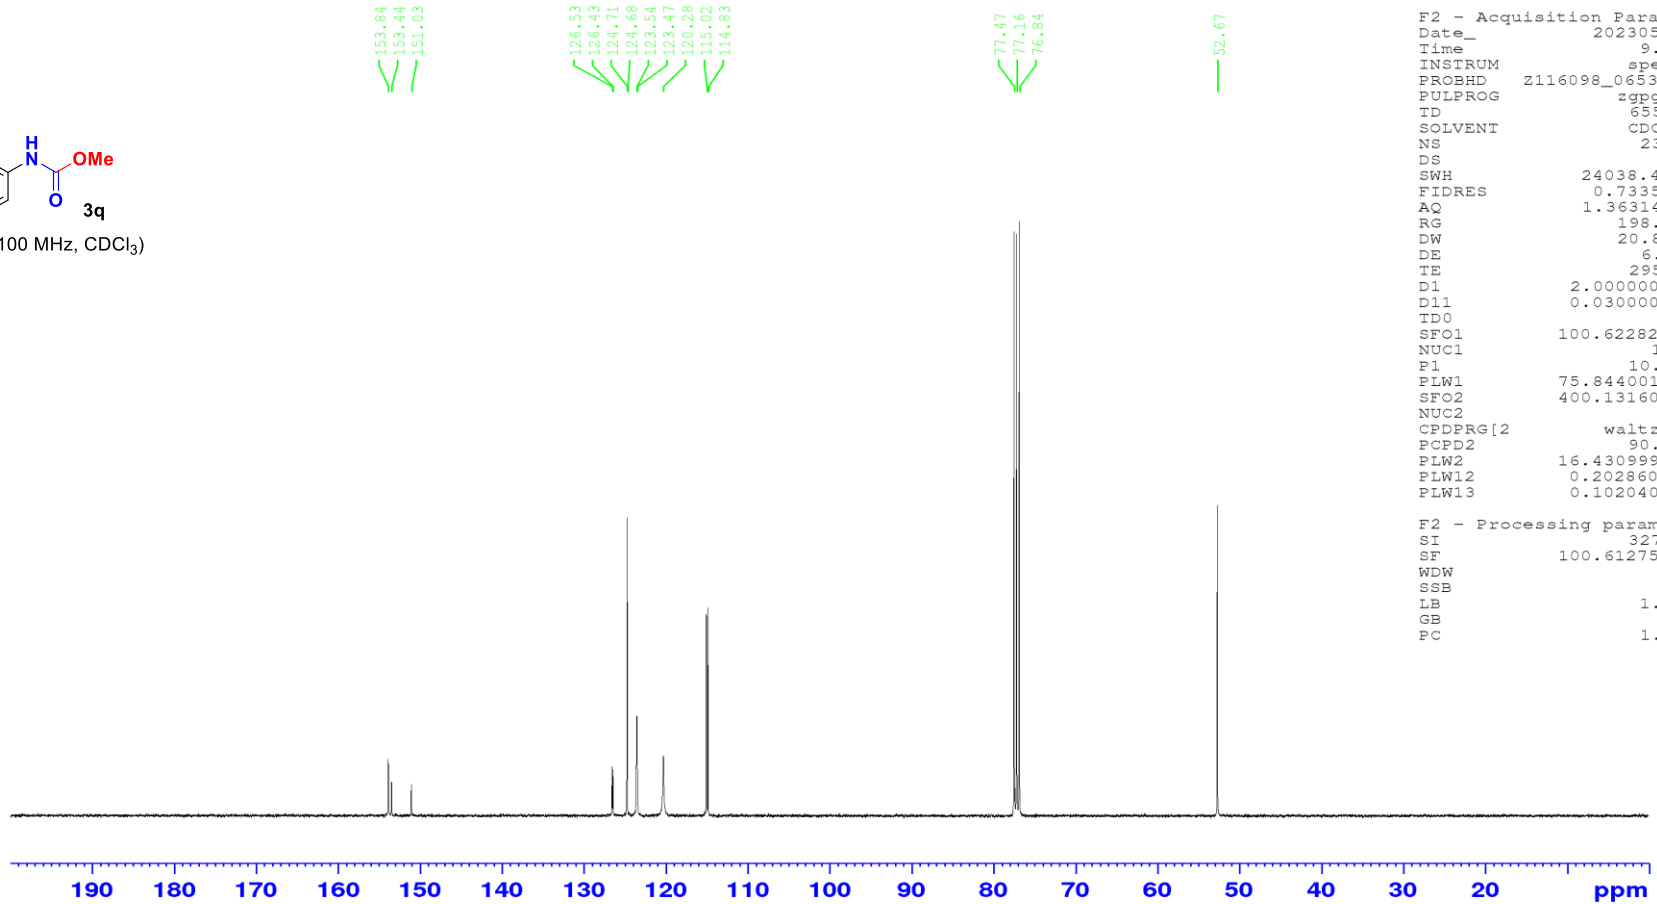

Current Data Parameters  
 NAME 85  
 EXPNO 2  
 PROCNO 1

F2 - Acquisition Parameters  
 Date\_ 20230531  
 Time 9.18 h  
 INSTRUM spect  
 PROBHD z116098\_0653 (  
 PULPROG zgpg30  
 TD 65536  
 SOLVENT CDCl3  
 NS 2313  
 DS 4  
 SWH 24038.461 Hz  
 FIDRES 0.733596 Hz  
 AQ 1.3631488 sec  
 RG 198.36  
 DW 20.800 usec  
 DE 6.50 usec  
 TE 295.1 K  
 D1 2.00000000 sec  
 D11 0.03000000 sec  
 TD0 1  
 SFO1 100.6228298 MHz  
 NUC1 13C  
 P1 10.00 usec  
 PLW1 75.84400177 W  
 SFO2 400.1316005 MHz  
 NUC2 1H  
 CPDPRG[2] waltz16  
 FCPD2 90.00 usec  
 PLW2 16.43099976 W  
 PLW12 0.20286000 W  
 PLW13 0.10204000 W

F2 - Processing parameters  
 SI 32768  
 SF 100.6127591 MHz  
 WDW EM  
 SSB 0  
 LB 1.00 Hz  
 GB 0  
 PC 1.40

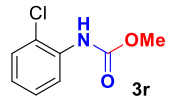

<sup>1</sup>H NMR (400 MHz, CDCl<sub>3</sub>)

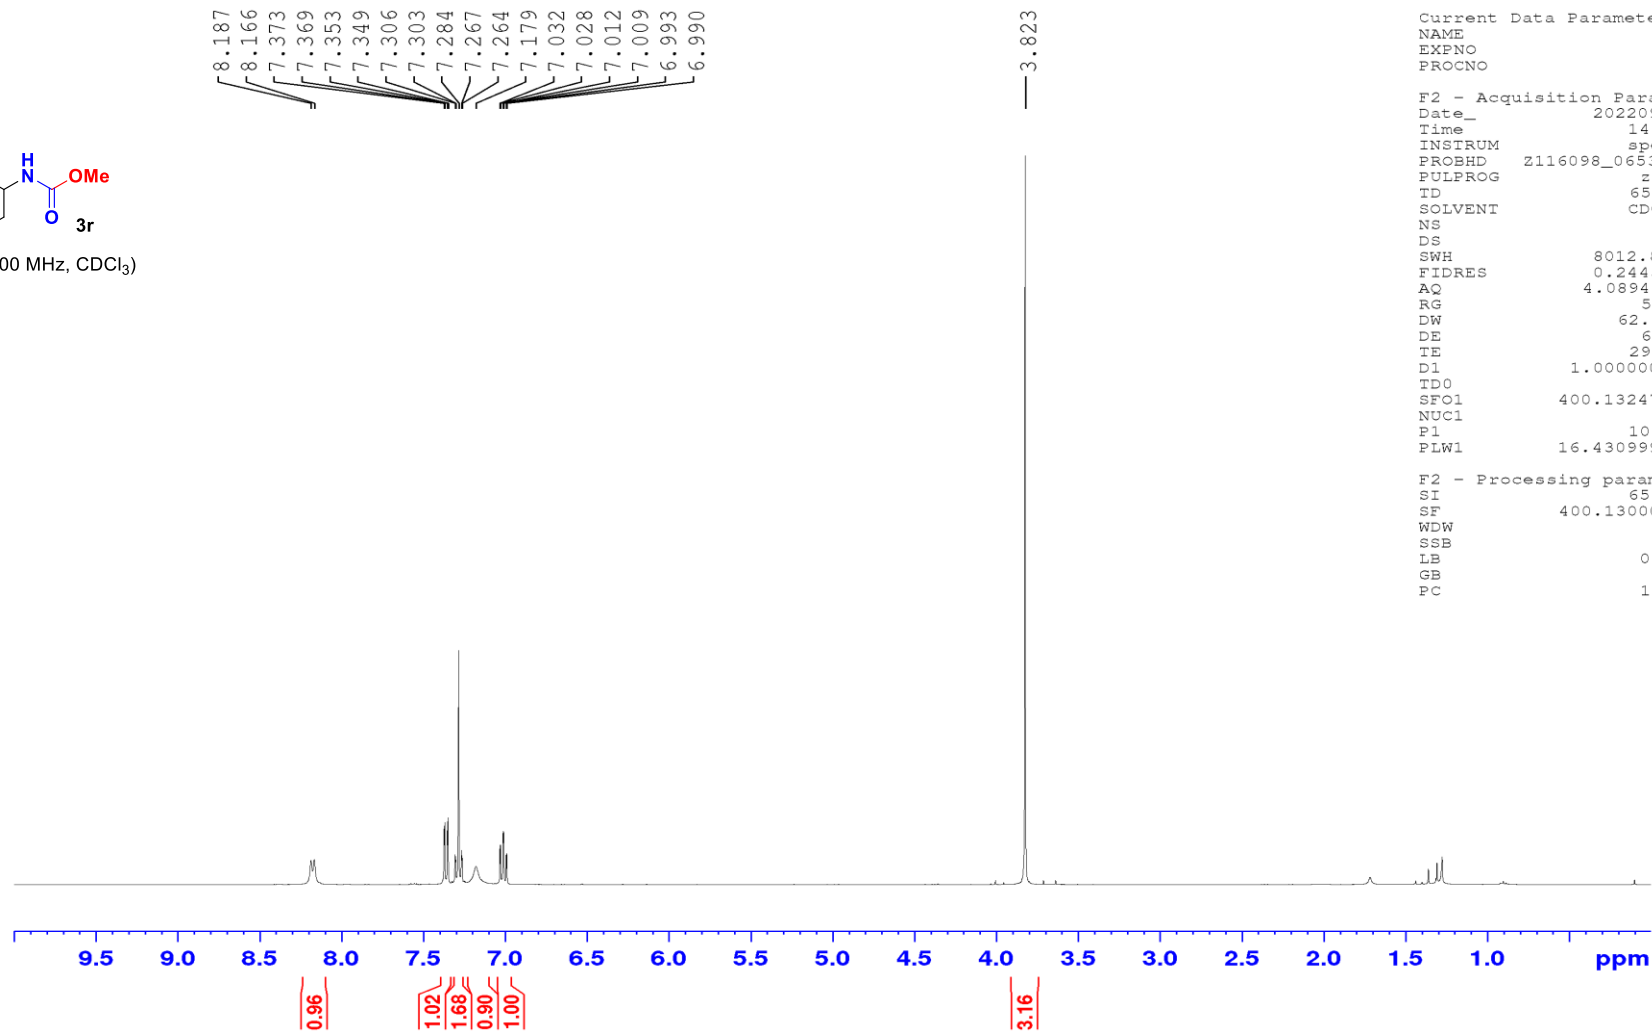

Current Data Parameters  
NAME 82  
EXPNO 1  
PROCNO 1

F2 - Acquisition Parameters  
Date\_ 20220914  
Time 14.50 h  
INSTRUM spect  
PROBHD Z116098\_0653 (  
PULPROG zg30  
TD 65536  
SOLVENT CDCl3  
NS 8  
DS 2  
SWH 8012.820 Hz  
FIDRES 0.244532 Hz  
AQ 4.0894465 sec  
RG 50.3  
DW 62.400 usec  
DE 6.50 usec  
TE 294.4 K  
D1 1.00000000 sec  
TD0 1  
SFO1 400.1324708 MHz  
NUC1 1H  
P1 10.00 usec  
PLW1 16.43099976 W

F2 - Processing parameters  
SI 65536  
SF 400.1300000 MHz  
WDW EM  
SSB 0  
LB 0.30 Hz  
GB 0  
PC 1.00

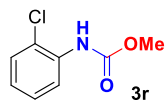

<sup>13</sup>C NMR (100 MHz, CDCl<sub>3</sub>)

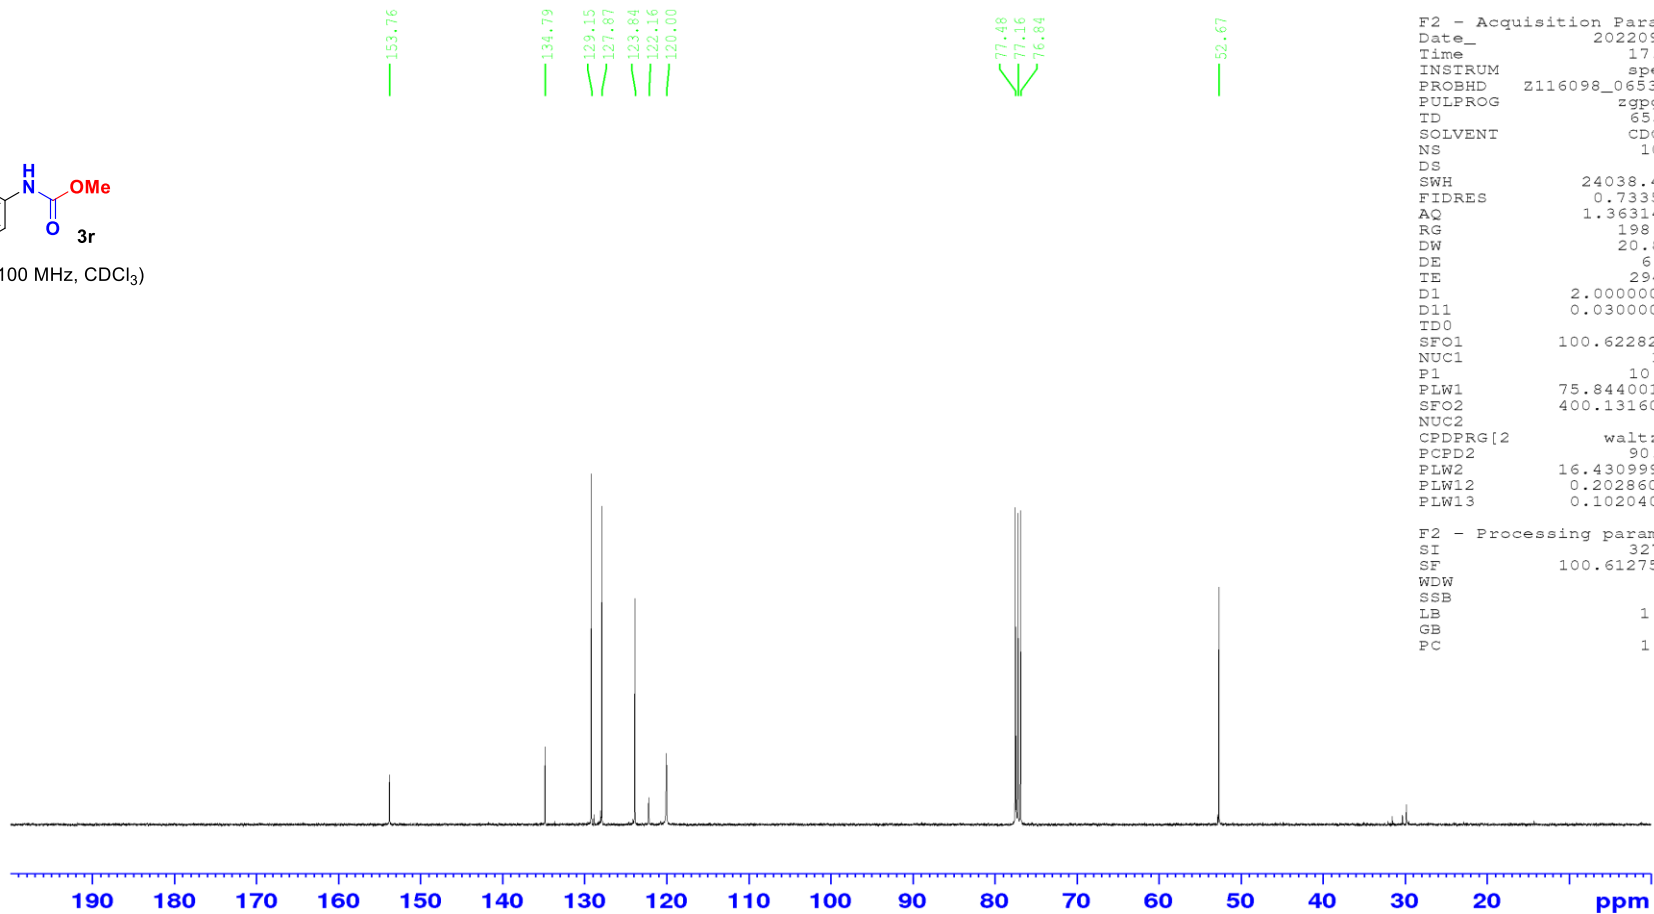

Current Data Parameters  
 NAME s2  
 EXPNO 2  
 PROCNO 1

F2 - Acquisition Parameters  
 Date\_ 20220914  
 Time 17.46 h  
 INSTRUM spect  
 PROBHD z116098\_0653 (  
 PULPROG zgpg30  
 TD 65536  
 SOLVENT CDCl3  
 NS 1024  
 DS 4  
 SWH 24038.461 Hz  
 FIDRES 0.733596 Hz  
 AQ 1.3631488 sec  
 RG 198.36  
 DW 20.800 usec  
 DE 6.50 usec  
 TE 294.7 K  
 D1 2.00000000 sec  
 D11 0.03000000 sec  
 TD0 1  
 SFO1 100.6228298 MHz  
 NUC1 13C  
 P1 10.00 usec  
 PLW1 75.84400177 W  
 SFO2 400.1316005 MHz  
 NUC2 1H  
 CPDPRG[2] waltz16  
 PCPD2 90.00 usec  
 PLW2 16.43099976 W  
 PLW12 0.20286000 W  
 PLW13 0.10204000 W

F2 - Processing parameters  
 SI 32768  
 SF 100.6127594 MHz  
 WDW EM  
 SSB 0  
 LB 1.00 Hz  
 GB 0  
 FC 1.40

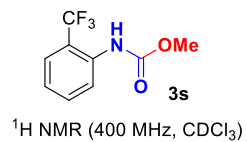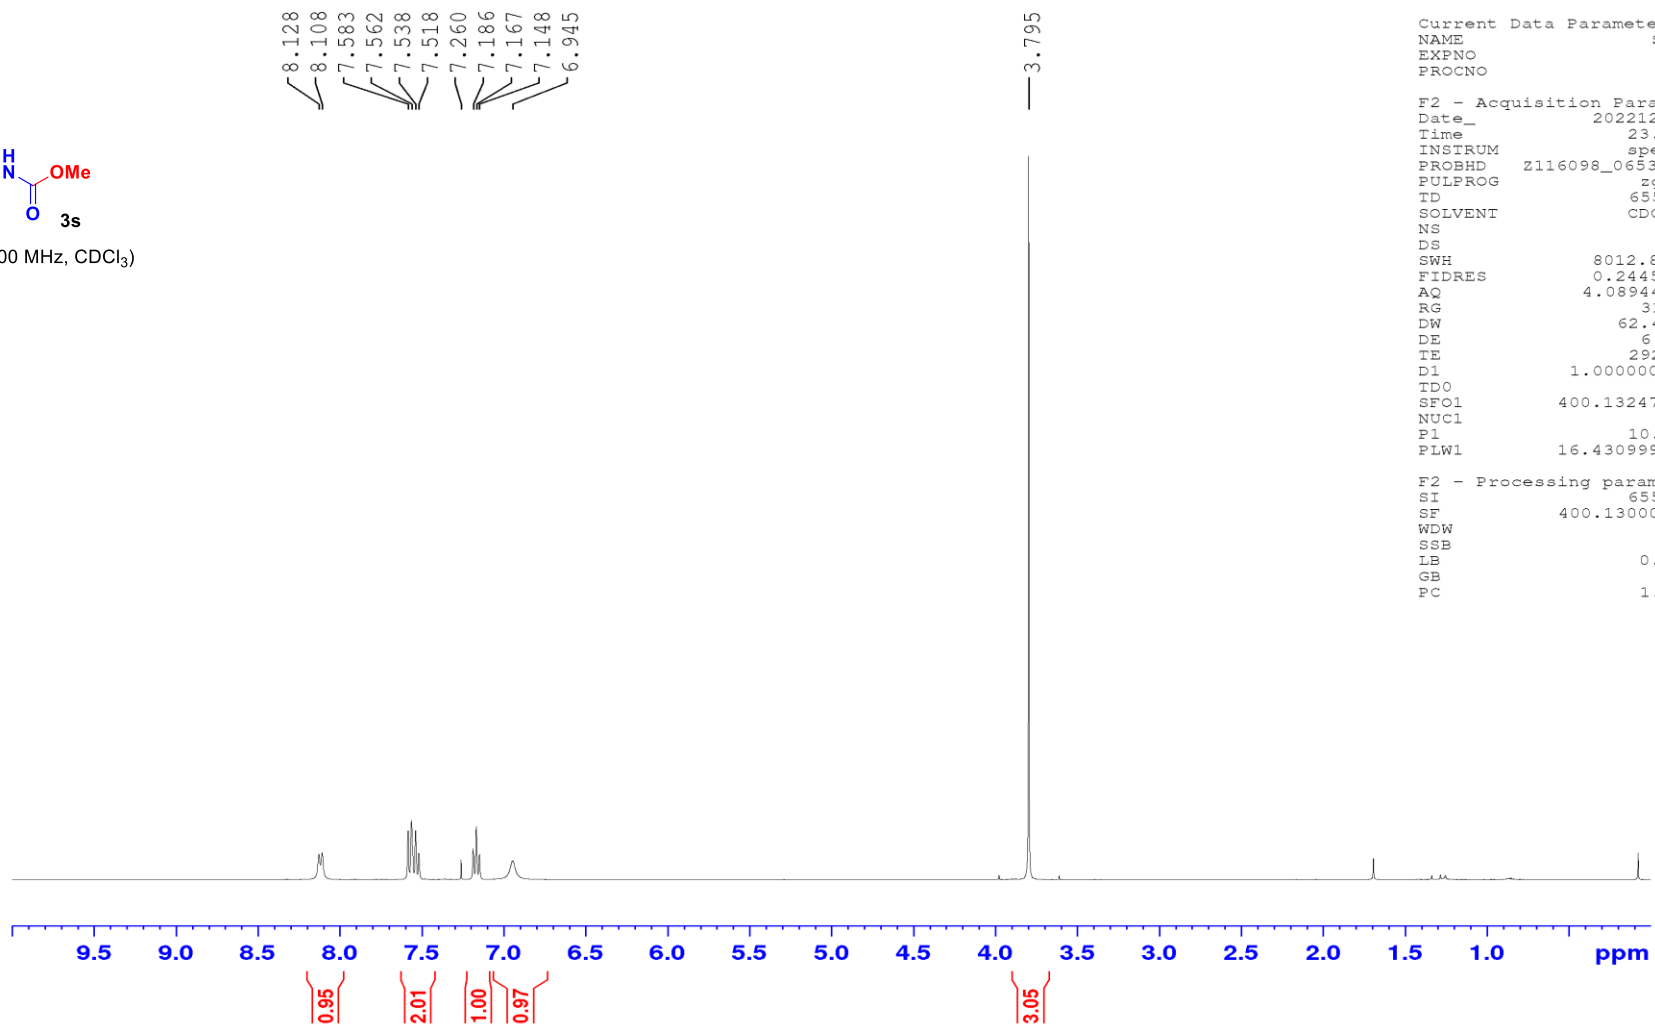

```

Current Data Parameters
NAME           S27
EXPNO          1
PROCNO         1

F2 - Acquisition Parameters
Date_          20221201
Time           23.55 h
INSTRUM        spect
PROBHD         Z116098_0653 (
PULPROG        zg30
TD             65536
SOLVENT        CDCl3
NS             8
DS             2
SWH            8012.820 Hz
FIDRES         0.244532 Hz
AQ            4.0894465 sec
RG            31.9
DW            62.400 usec
DE            6.50 usec
TE            292.9 K
D1            1.00000000 sec
TD0           1
SFO1          400.1324708 MHz
NUC1           1H
E1            10.00 usec
PLW1          16.43099976 W

F2 - Processing parameters
SI            65536
SF            400.1300098 MHz
WDW           EM
SSB           0
LB            0.30 Hz
GB            0
PC            1.00
  
```

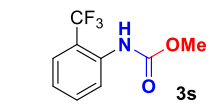

<sup>13</sup>C NMR (100 MHz, CDCl<sub>3</sub>)

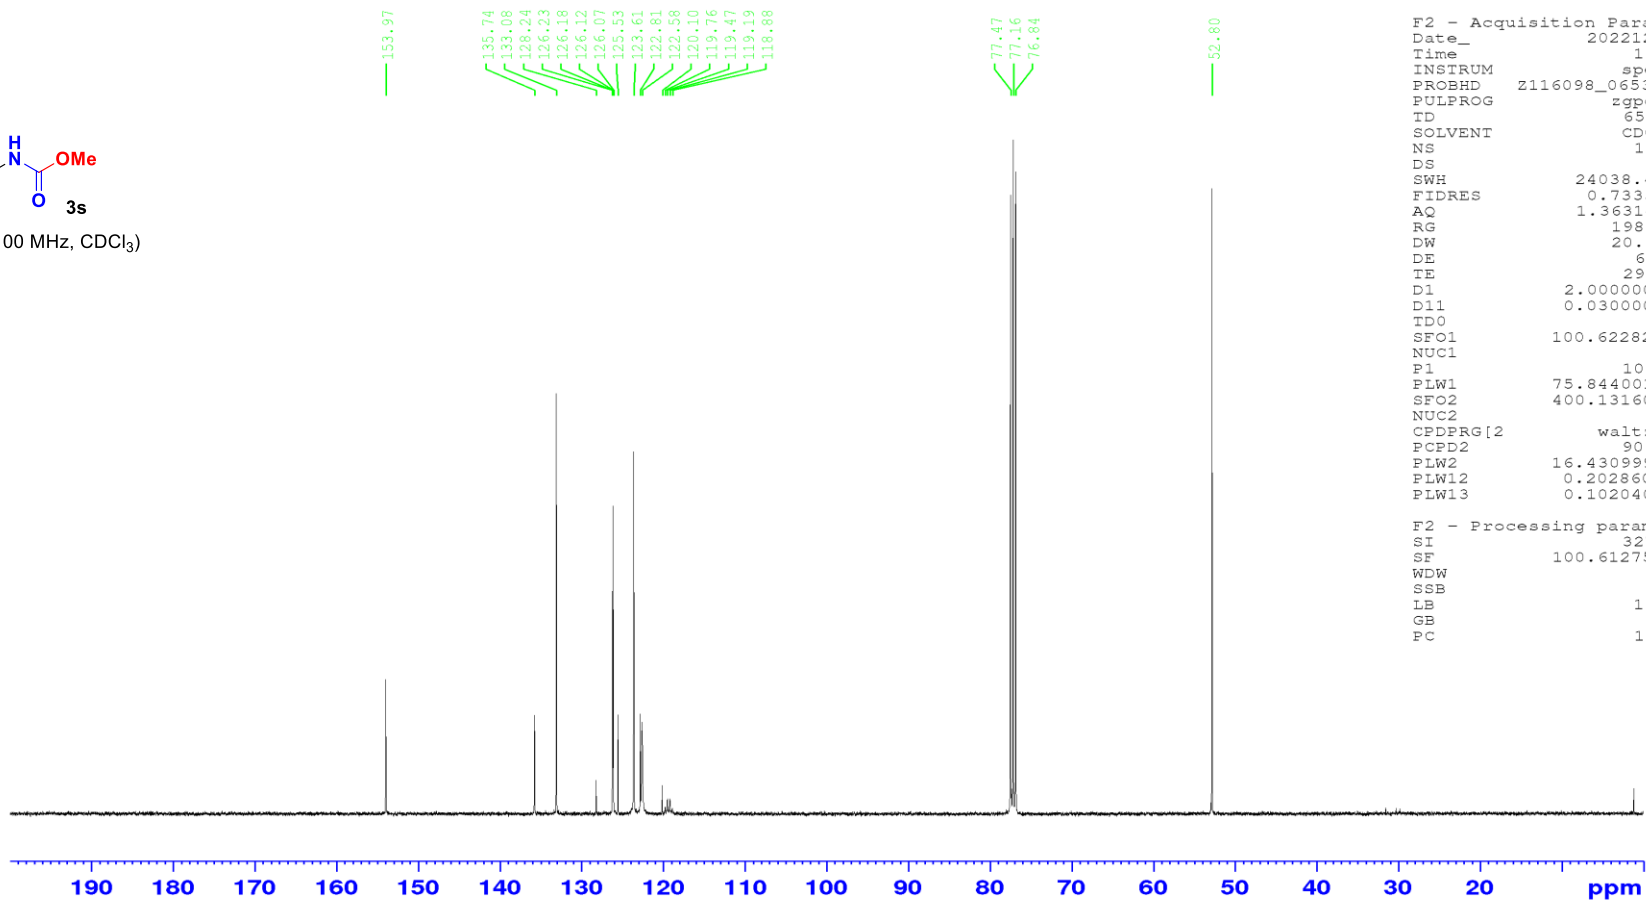

Current Data Parameters  
 NAME S27  
 EXPNO 2  
 PROCNO 1

F2 - Acquisition Parameters  
 Date\_ 20221202  
 Time 1.44 h  
 INSTRUM spect  
 PROBHD Z116098\_0653 (  
 PULPROG zgpg30  
 TD 65536  
 SOLVENT CDCl3  
 NS 1888  
 DS 4  
 SWH 24038.461 Hz  
 FIDRES 0.733596 Hz  
 AQ 1.3631488 sec  
 RG 198.36  
 DW 20.800 usec  
 DE 6.50 usec  
 TE 293.6 K  
 D1 2.00000000 sec  
 D11 0.03000000 sec  
 TD0 1  
 SFO1 100.6228298 MHz  
 NUC1 13C  
 P1 10.00 usec  
 PLW1 75.84400177 W  
 SFO2 400.1316005 MHz  
 NUC2 1H  
 CPDPRG[2] waltz16  
 PCPD2 90.00 usec  
 PLW2 16.43099976 W  
 PLW12 0.20286000 W  
 PLW13 0.10204000 W

F2 - Processing parameters  
 SI 32768  
 SF 100.6127579 MHz  
 WDW EM  
 SSB 0  
 LB 1.00 Hz  
 GB 0  
 PC 1.40



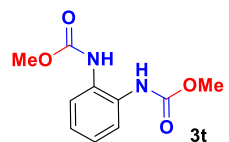

<sup>1</sup>H NMR (400 MHz, CDCl<sub>3</sub>)

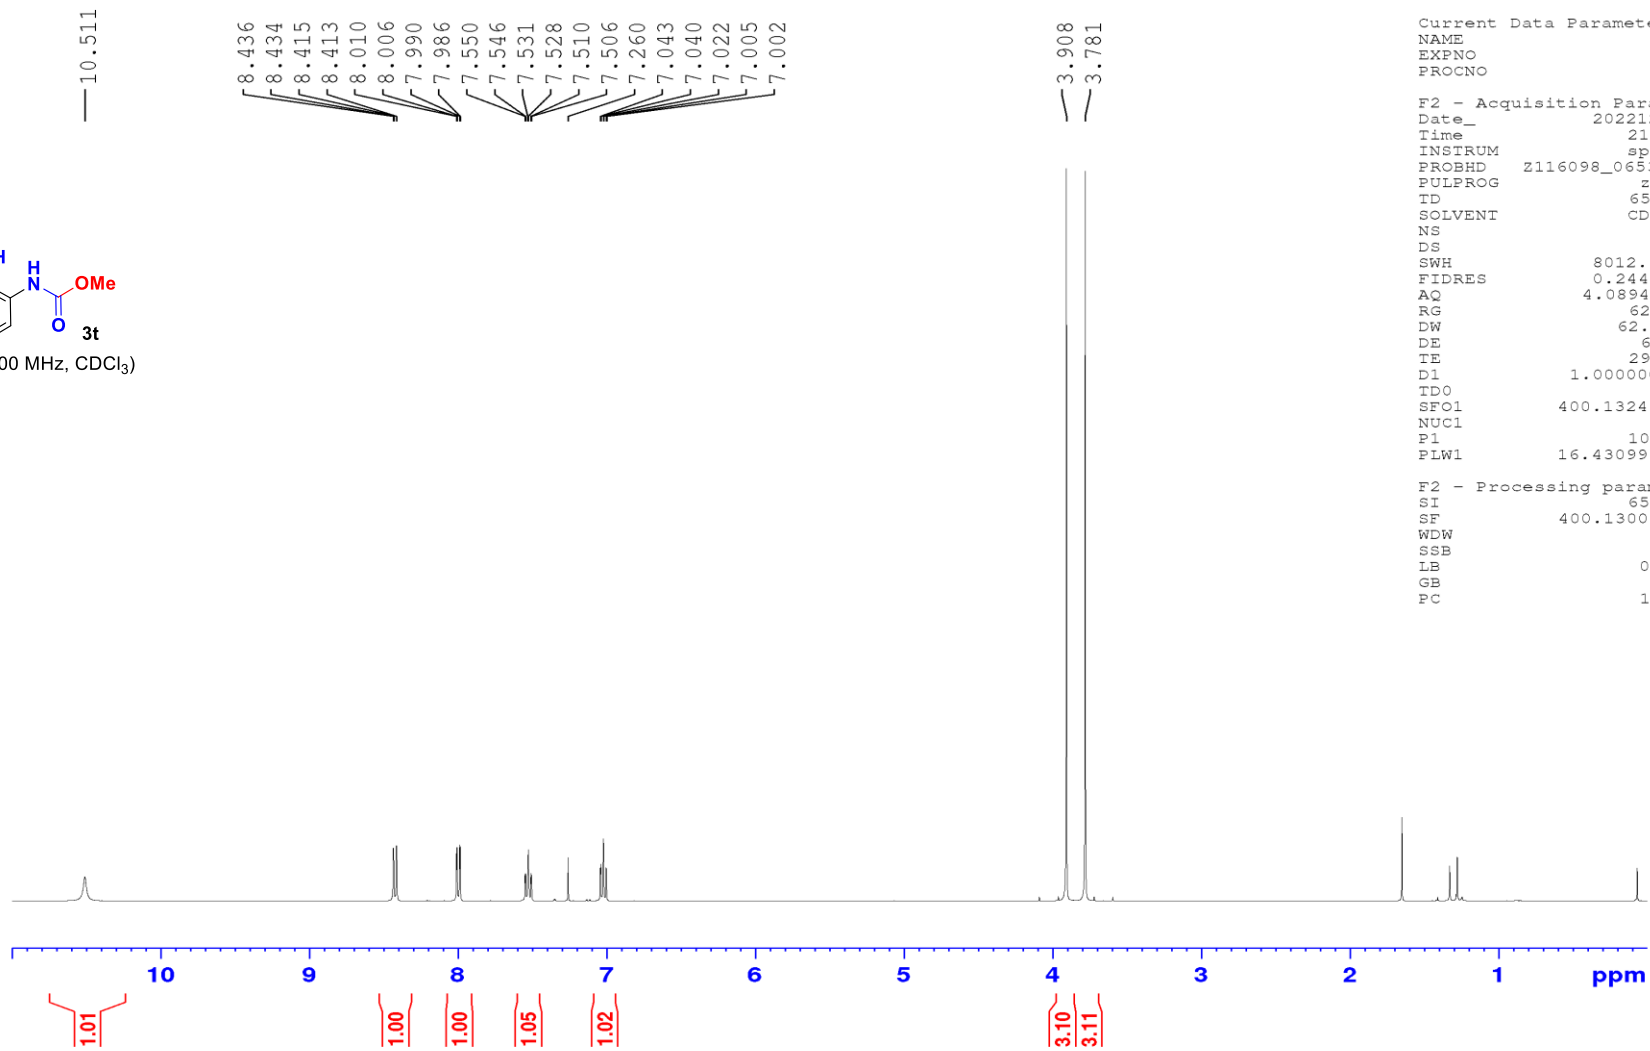

Current Data Parameters  
 NAME S30  
 EXPNO 1  
 PROCNO 1

F2 - Acquisition Parameters  
 Date\_ 20221206  
 Time 21.50 h  
 INSTRUM spect  
 PROBHD Z116098\_0653 (  
 PULPROG zg30  
 TD 65536  
 SOLVENT CDCl3  
 NS 16  
 DS 2  
 SWH 8012.820 Hz  
 FIDRES 0.244532 Hz  
 AQ 4.0894465 sec  
 RG 62.98  
 DW 62.400 usec  
 DE 6.50 usec  
 TE 293.1 K  
 D1 1.00000000 sec  
 TD0 1  
 SFO1 400.1324708 MHz  
 NUC1 1H  
 P1 10.00 usec  
 PLW1 16.43099976 W

F2 - Processing parameters  
 SI 65536  
 SF 400.1300098 MHz  
 WDW EM  
 SSB 0  
 LB 0.30 Hz  
 GB 0  
 PC 1.00

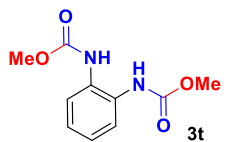

<sup>13</sup>C NMR (100 MHz, CDCl<sub>3</sub>)

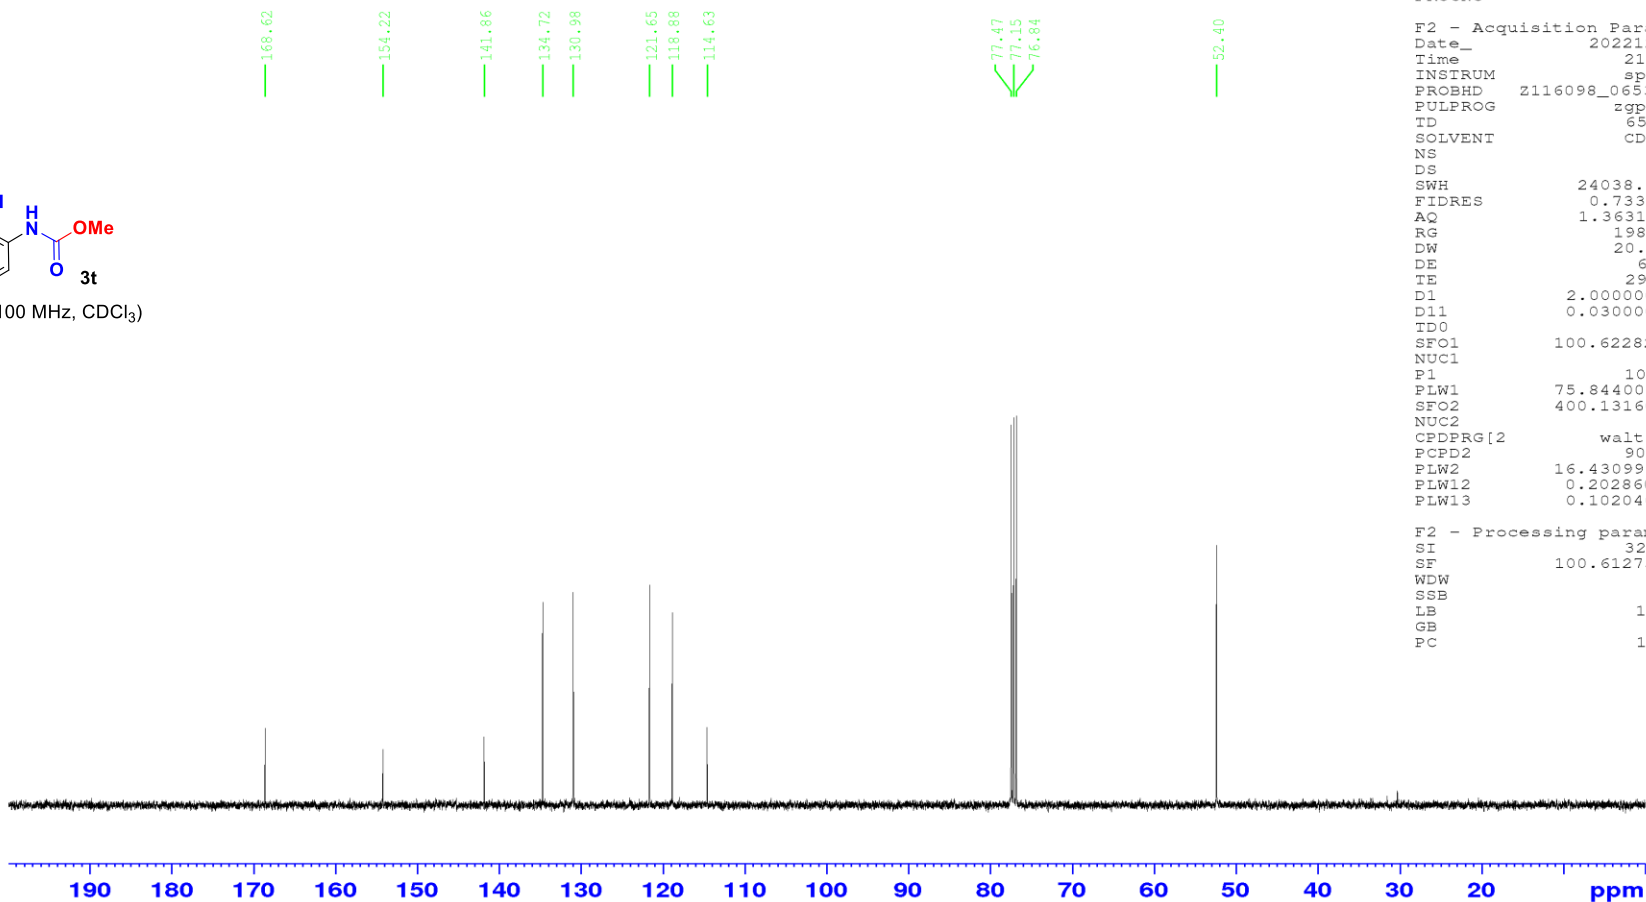

Current Data Parameters  
 NAME S30  
 EXPNO 2  
 PROCNO 1

F2 - Acquisition Parameters  
 Date\_ 20221206  
 Time 21.56 h  
 INSTRUM spect  
 PROBHD z116098\_0653 (  
 PULPROG zgpg30  
 TD 65536  
 SOLVENT CDCl3  
 NS 88  
 DS 4  
 SWH 24038.461 Hz  
 FIDRES 0.733596 Hz  
 AQ 1.3631488 sec  
 RG 198.36  
 DW 20.800 usec  
 DE 6.50 usec  
 TE 293.4 K  
 D1 2.00000000 sec  
 D11 0.03000000 sec  
 TD0 1  
 SFO1 100.6228298 MHz  
 NUC1 13C  
 P1 10.00 usec  
 PLW1 75.84400177 W  
 SFO2 400.1316005 MHz  
 NUC2 1H  
 CPDPRG[2] waltz16  
 PCPD2 90.00 usec  
 PLW2 16.43099976 W  
 PLW12 0.20286000 W  
 PLW13 0.10204000 W

F2 - Processing parameters  
 SI 32768  
 SF 100.6127586 MHz  
 WDW EM  
 SSB 0  
 LB 1.00 Hz  
 GB 0  
 PC 1.40

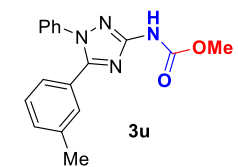

<sup>1</sup>H NMR (400 MHz, CDCl<sub>3</sub>)

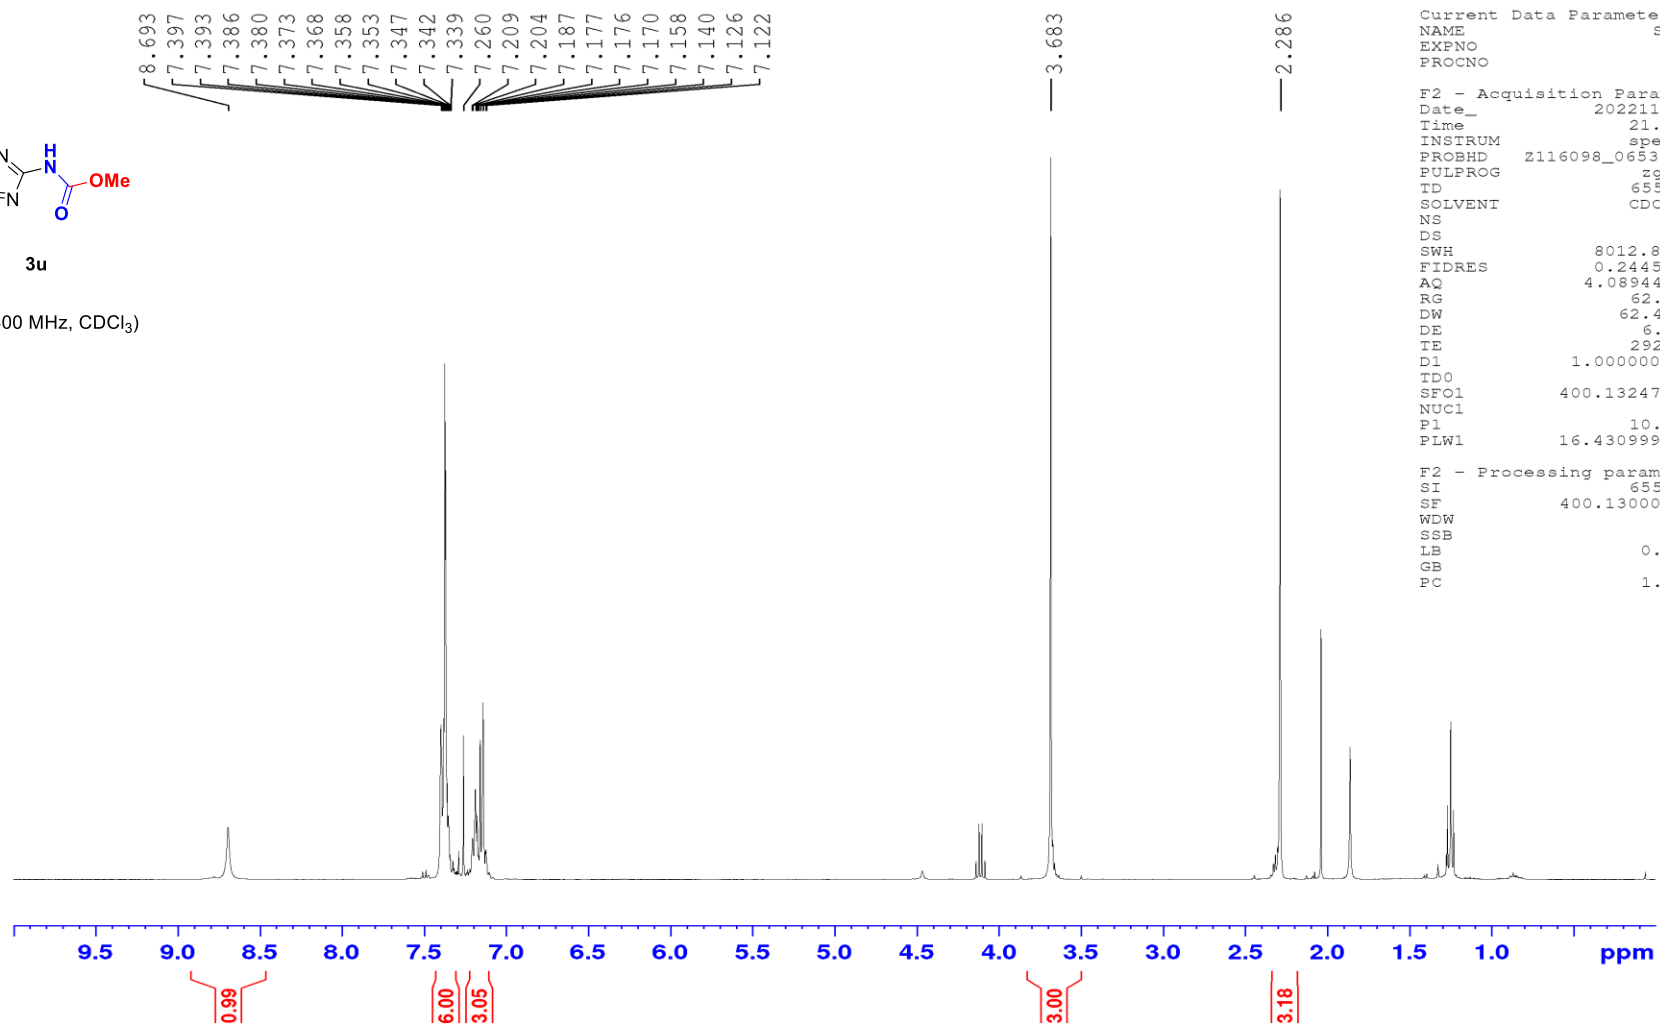

Current Data Parameters  
 NAME S25  
 EXPNO 1  
 PROCNO 1

F2 - Acquisition Parameters  
 Date\_ 20221119  
 Time 21.21 h  
 INSTRUM spect  
 PROBHD Z116098\_0653 (  
 PULPROG zg30  
 TD 65536  
 SOLVENT CDCl3  
 NS 16  
 DS 2  
 SWH 8012.820 Hz  
 FIDRES 0.244532 Hz  
 AQ 4.0894465 sec  
 RG 62.98  
 DW 62.400 usec  
 DE 6.50 usec  
 TE 292.2 K  
 D1 1.00000000 sec  
 TD0 1  
 SF01 400.1324708 MHz  
 NUC1 1H  
 P1 10.00 usec  
 PLW1 16.43099976 W

F2 - Processing parameters  
 SI 65536  
 SF 400.130098 MHz  
 WDW EM  
 SSB 0  
 LB 0.30 Hz  
 GB 0  
 PC 1.00

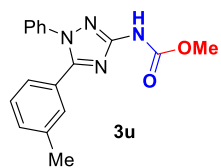

<sup>13</sup>C NMR (100 MHz, CDCl<sub>3</sub>)

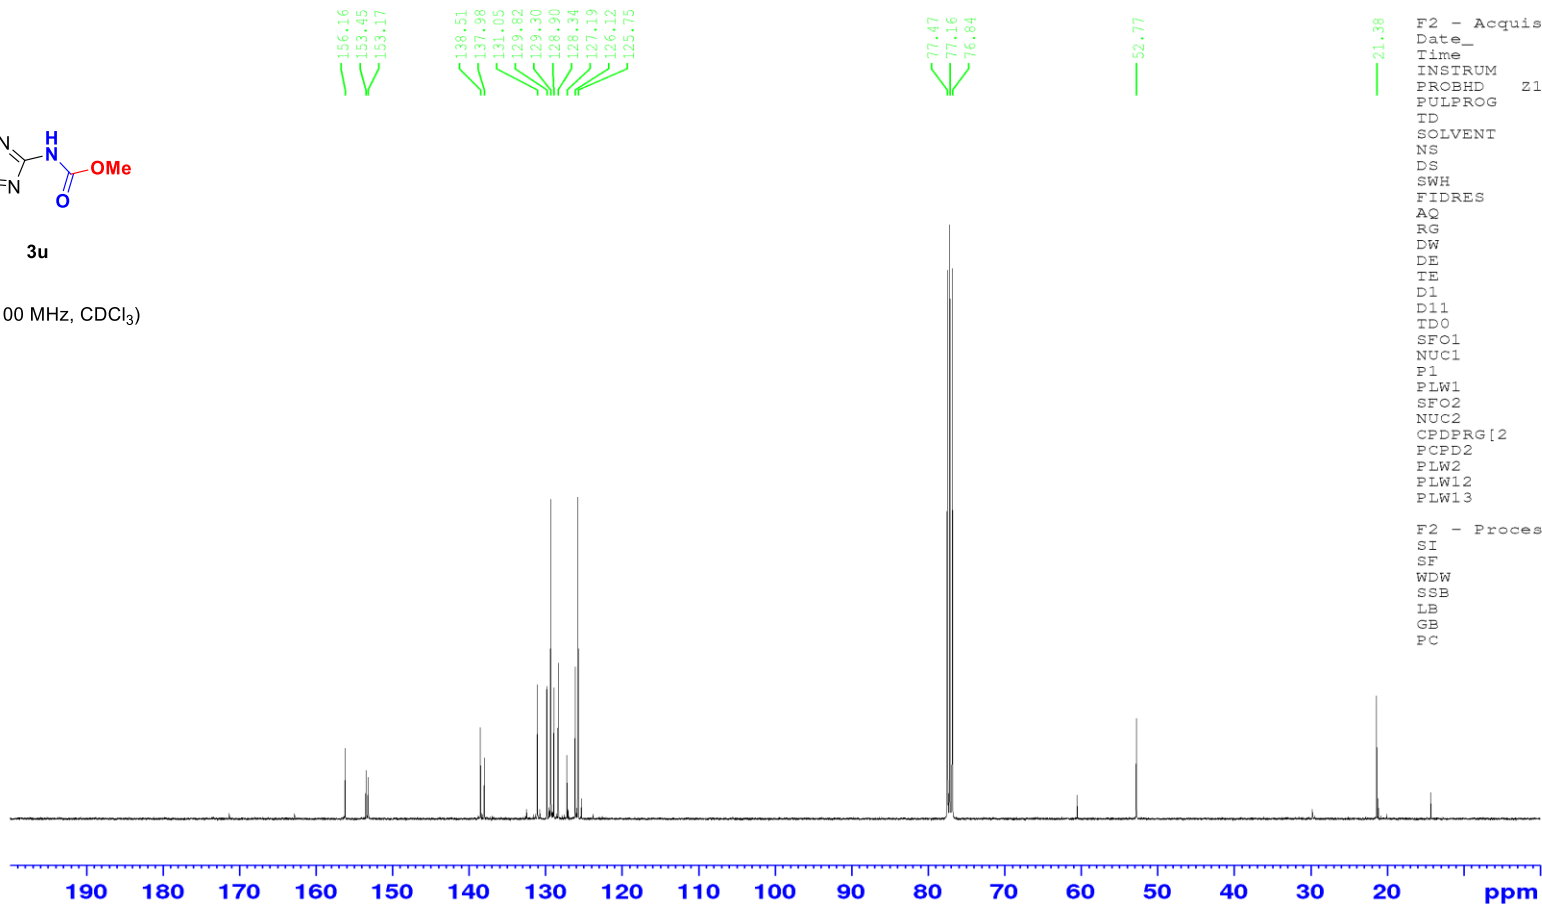

Current Data Parameters  
 NAME S25  
 EXPNO 2  
 PROCNO 1

F2 - Acquisition Parameters  
 Date\_ 20221120  
 Time 0.32 h  
 INSTRUM spect  
 PROBHD Z116098\_0653 (  
 PULPROG zgpg30  
 TD 65536  
 SOLVENT CDCl3  
 NS 3333  
 DS 4  
 SWH 24038.461 Hz  
 FIDRES 0.733596 Hz  
 AQ 1.3631488 sec  
 RG 198.36  
 DW 20.800 usec  
 DE 6.50 usec  
 TE 293.0 K  
 D1 2.00000000 sec  
 D11 0.03000000 sec  
 TD0 1  
 SFO1 100.6228298 MHz  
 NUC1 13C  
 P1 10.00 usec  
 PLW1 75.84400177 W  
 SFO2 400.1316005 MHz  
 NUC2 1H  
 CPDPRG[2] waltz16  
 FCPD2 90.00 usec  
 PLW2 16.43099976 W  
 PLW12 0.20286000 W  
 PLW13 0.10204000 W

F2 - Processing parameters  
 SI 32768  
 SF 100.6127601 MHz  
 WDW EM  
 SSB 0  
 LB 1.00 Hz  
 GB 0  
 PC 1.40

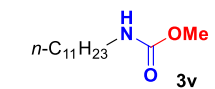

<sup>1</sup>H NMR (400 MHz, CDCl<sub>3</sub>)

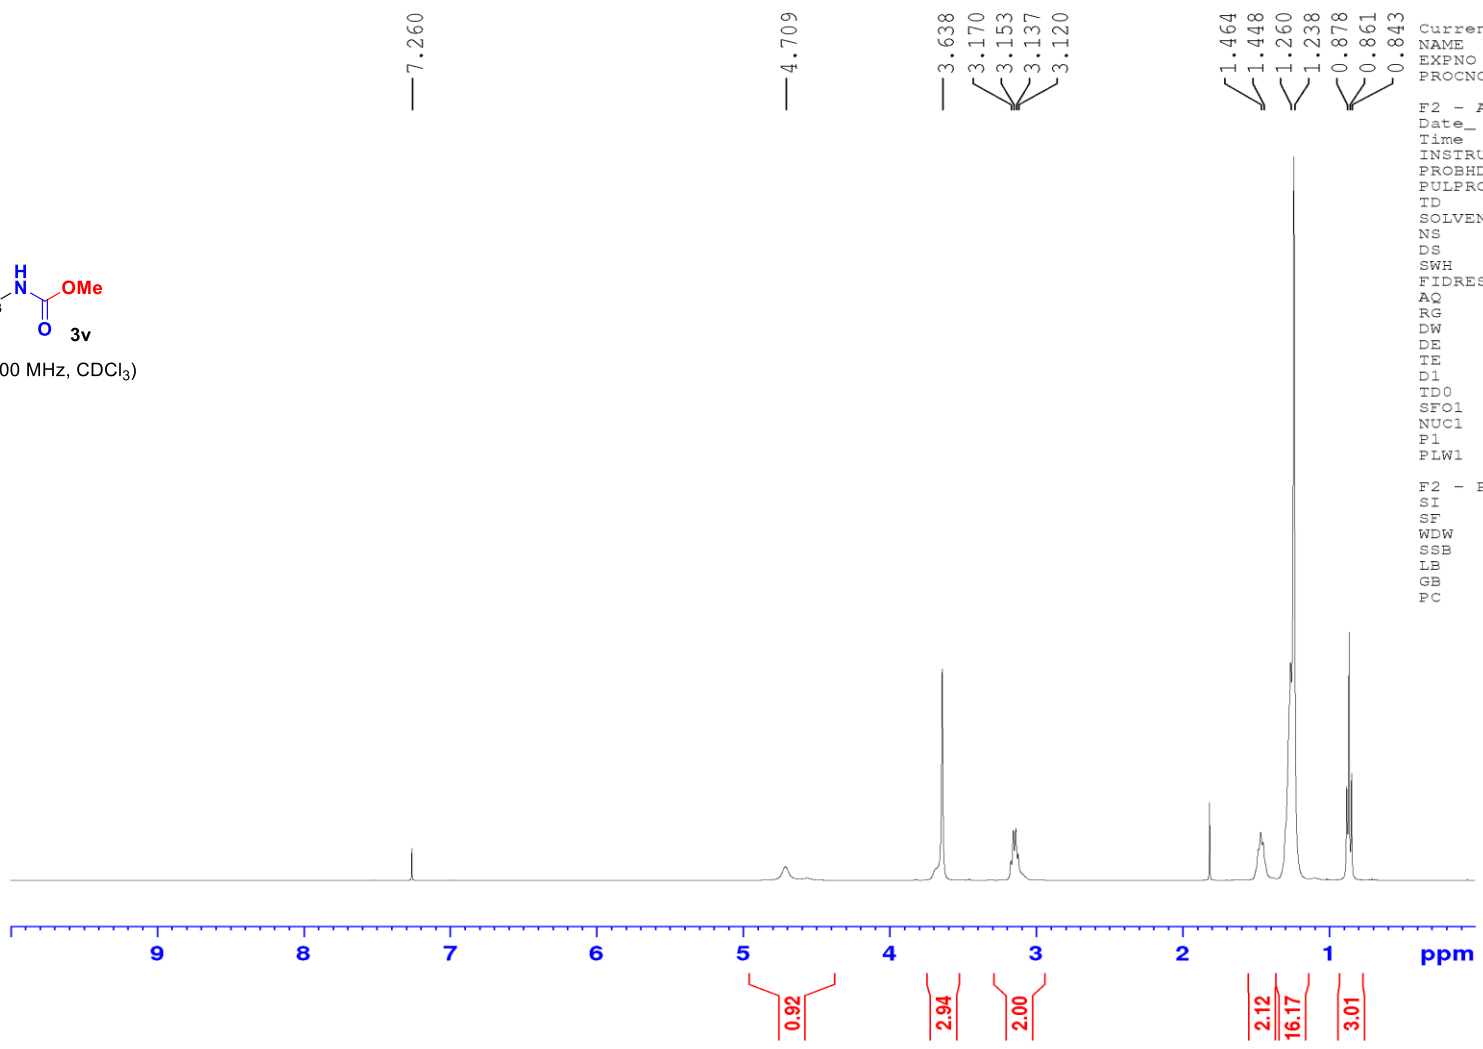

```

Current Data Parameters
NAME          S19
EXPNO        1
PROCNO       1

F2 - Acquisition Parameters
Date_        20221005
Time         21.24 h
INSTRUM      spect
PROBHD       Z116098_0653 (
PULPROG      zg30
TD           65536
SOLVENT      CDCl3
NS           16
DS           2
SWH          8012.820 Hz
FIDRES       0.244532 Hz
AQ           4.0894465 sec
RG           31.9
DW           62.400 usec
DE           6.50 usec
TE           293.3 K
D1           1.00000000 sec
TD0          1
SFO1         400.1324708 MHz
NUC1         1H
P1           10.00 usec
PLW1         16.43099976 W

F2 - Processing parameters
SI           65536
SF           400.1300098 MHz
WDW          EM
SSB          0
LB           0.30 Hz
GB           0
PC           1.00
  
```

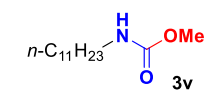

<sup>13</sup>C NMR (100 MHz, CDCl<sub>3</sub>)

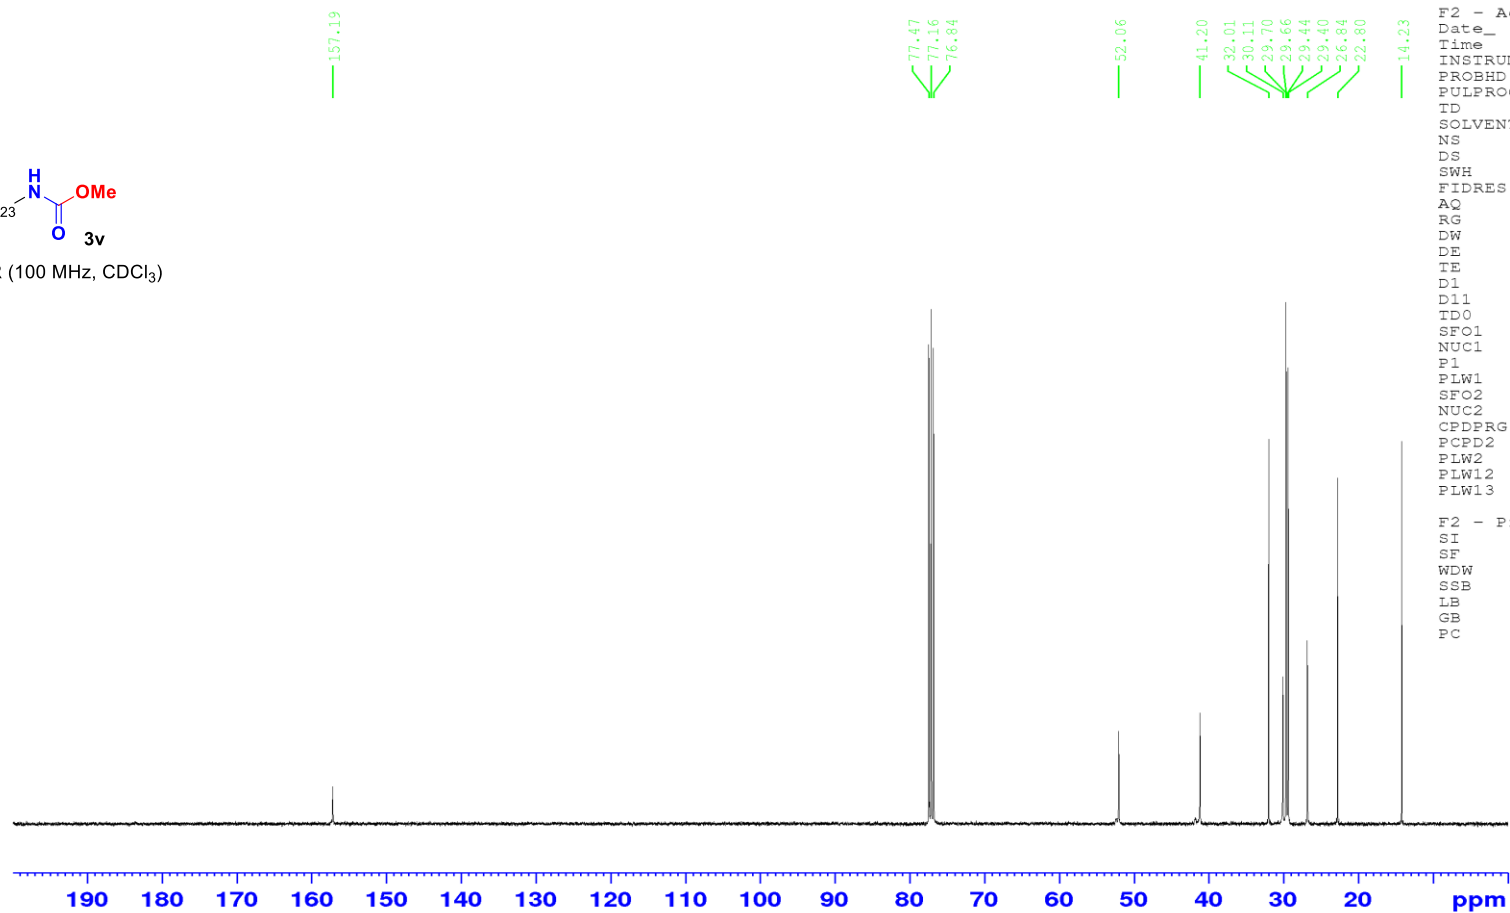

Current Data Parameters  
NAME S19  
EXPNO 2  
PROCNO 1

F2 - Acquisition Parameters  
Date\_ 20221005  
Time 22.43 h  
INSTRUM spect  
PROBHD Z116098\_0653 (  
PULPROG zgpg30  
TD 65536  
SOLVENT CDCl3  
NS 1033  
DS 4  
SWH 24038.461 Hz  
FIDRES 0.733596 Hz  
AQ 1.3631488 sec  
RG 198.36  
DW 20.800 usec  
DE 6.50 usec  
TE 293.7 K  
D1 2.00000000 sec  
D11 0.03000000 sec  
TD0 1  
SFO1 100.6228298 MHz  
NUC1 13c  
P1 10.00 usec  
PLW1 75.84400177 W  
SFO2 400.1316005 MHz  
NUC2 1H  
CPDPRG[2] waltz16  
PCPD2 90.00 usec  
PLW2 16.43099976 W  
PLW12 0.20286000 W  
PLW13 0.10204000 W

F2 - Processing parameters  
SI 32768  
SF 100.6127579 MHz  
WDW EM  
SSB 0  
LB 1.00 Hz  
GB 0  
FC 1.40

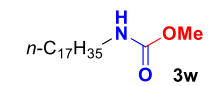

<sup>1</sup>H NMR (400 MHz, CDCl<sub>3</sub>)

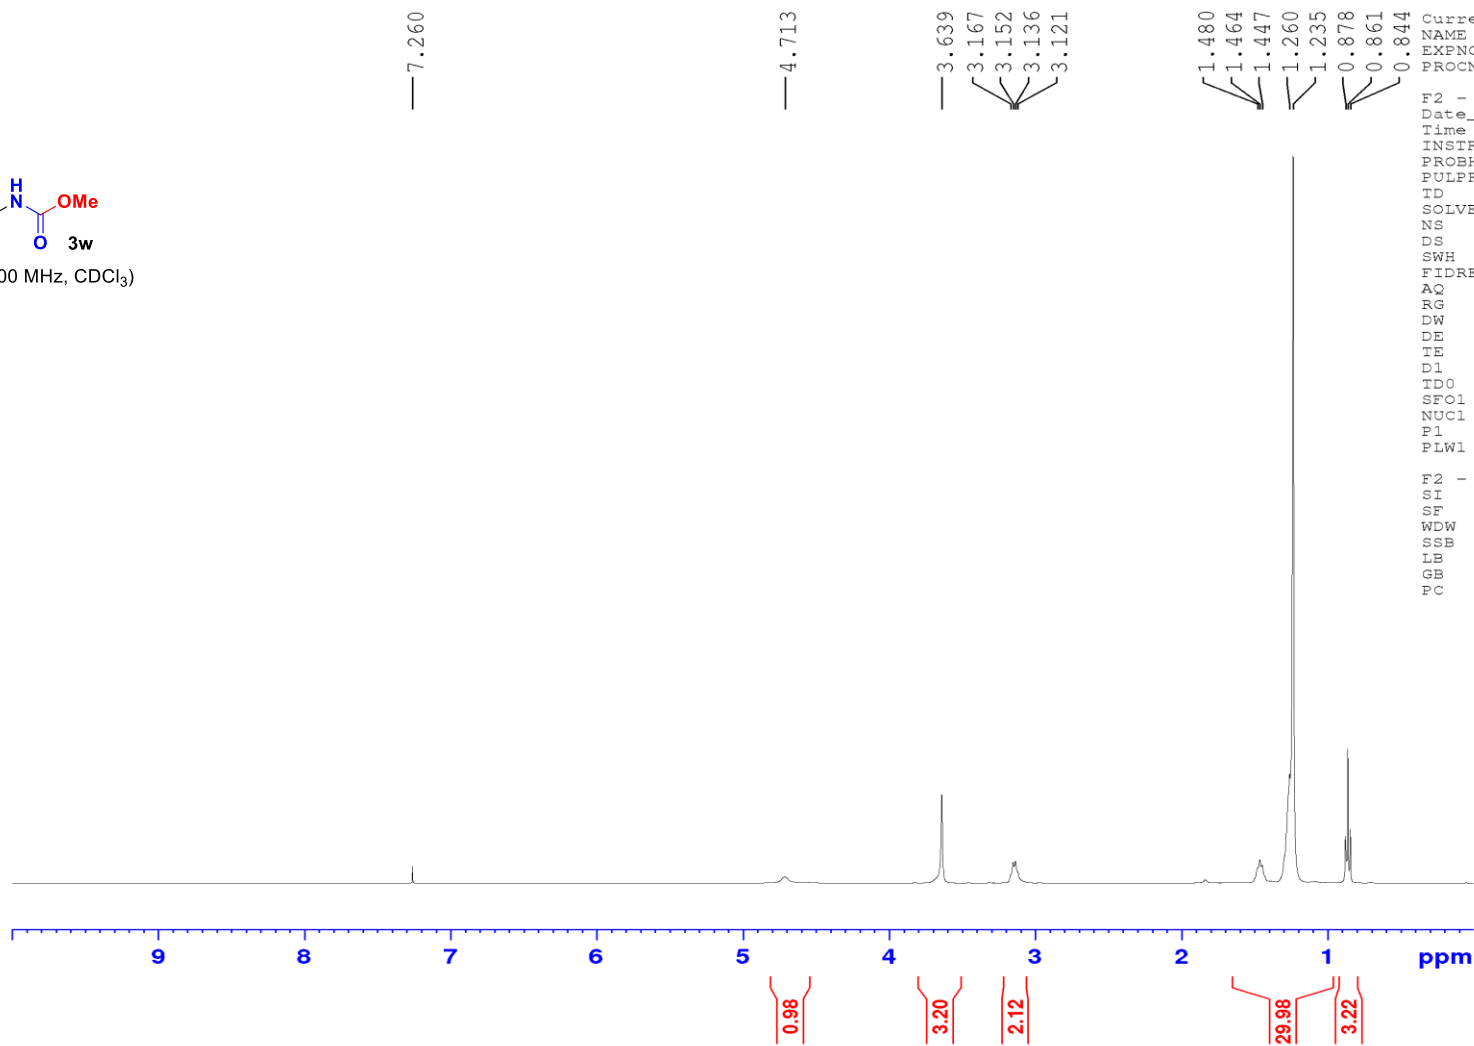

```

Current Data Parameters
NAME                S26
EXPNO                1
PROCNO               1

F2 - Acquisition Parameters
Date_                20221124
Time                 0.54 h
INSTRUM              spect
PROBHD               Z116098_0653 (
PULPROG              zg30
TD                   65536
SOLVENT              CDCl3
NS                   16
DS                   2
SWH                  8012.820 Hz
FIDRES               0.244532 Hz
AQ                   4.0894465 sec
RG                   19.89
DW                   62.400 usec
DE                   6.50 usec
TE                   292.7 K
D1                   1.00000000 sec
TD0                  1
SFO1                 400.1324708 MHz
NUC1                 1H
P1                   10.00 usec
PLW1                 16.43099976 W

F2 - Processing parameters
SI                   65536
SF                   400.1300097 MHz
WDW                  EM
SSB                  0
LB                   0.30 Hz
GB                   0
PC                   1.00
  
```

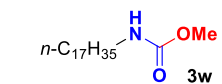

<sup>13</sup>C NMR (100 MHz, CDCl<sub>3</sub>)

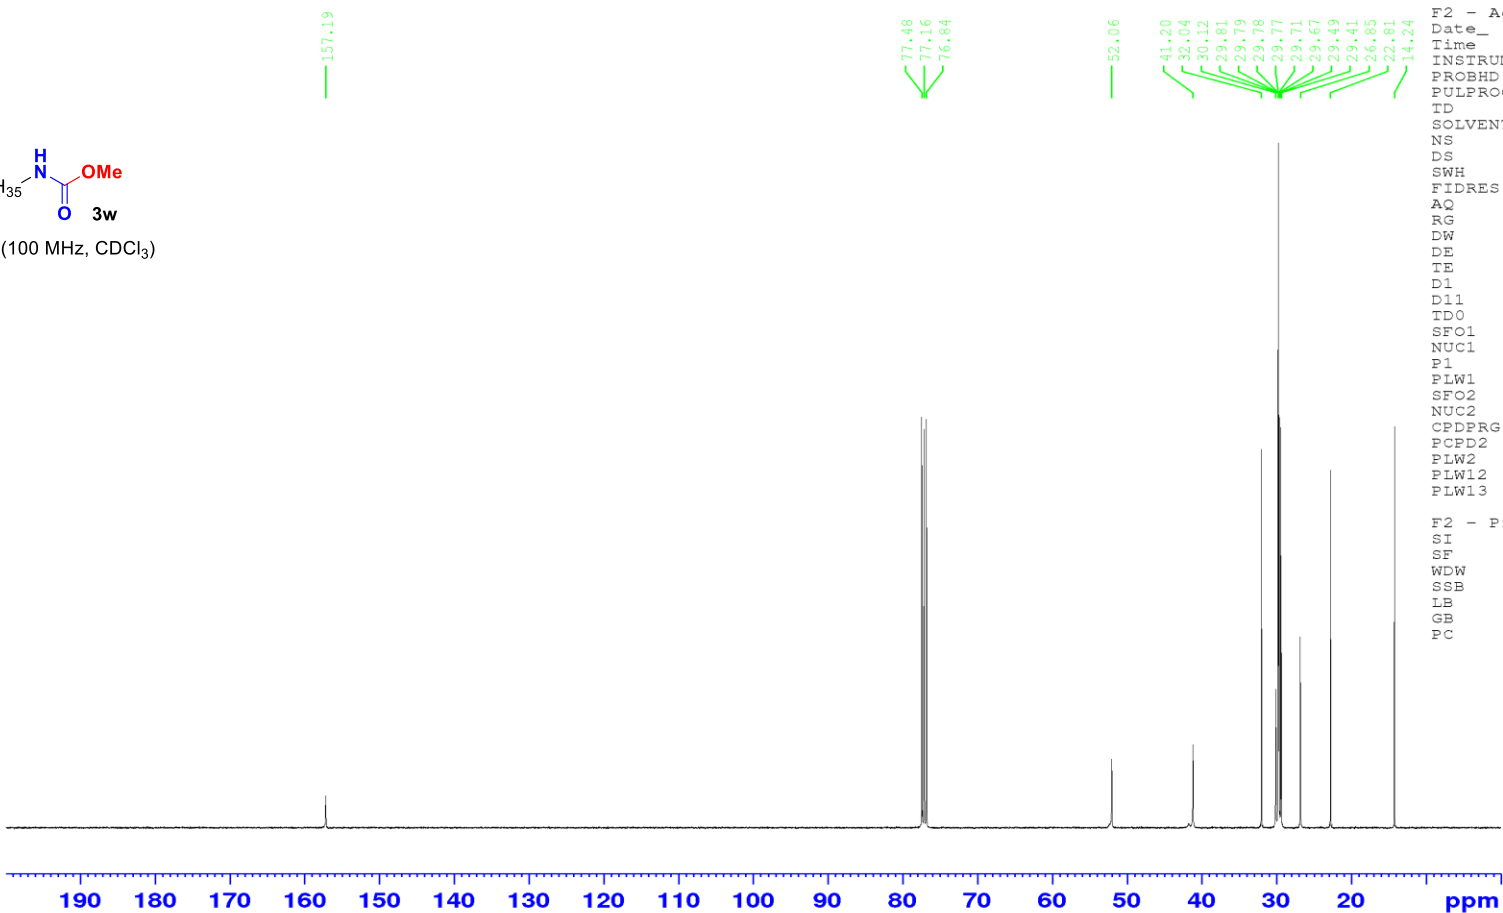

Current Data Parameters  
NAME S26  
EXPNO 2  
PROCNO 1

F2 - Acquisition Parameters  
Date\_ 20221124  
Time 4.06 h  
INSTRUM spect  
PROBHD Z116098\_0653  
PULPROG zgpg30  
TD 65536  
SOLVENT CDCl3  
NS 3333  
DS 4  
SWH 24038.461 Hz  
FIDRES 0.733596 Hz  
AQ 1.3631488 sec  
RG 198.36  
DW 20.800 usec  
DE 6.50 usec  
TE 293.1 K  
D1 2.00000000 sec  
D11 0.03000000 sec  
TD0 1  
SFO1 100.6228298 MHz  
NUC1 13c  
P1 10.00 usec  
PLW1 75.84400177 W  
SFO2 400.1316005 MHz  
NUC2 1H  
CPDPRG[2] waltz16  
PCPD2 90.00 usec  
PLW2 16.43099976 W  
PLW12 0.20286000 W  
PLW13 0.10204000 W

F2 - Processing parameters  
SI 32768  
SF 100.6127579 MHz  
WDW EM  
SSB 0  
LB 1.00 Hz  
GB 0  
PC 1.40



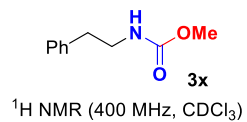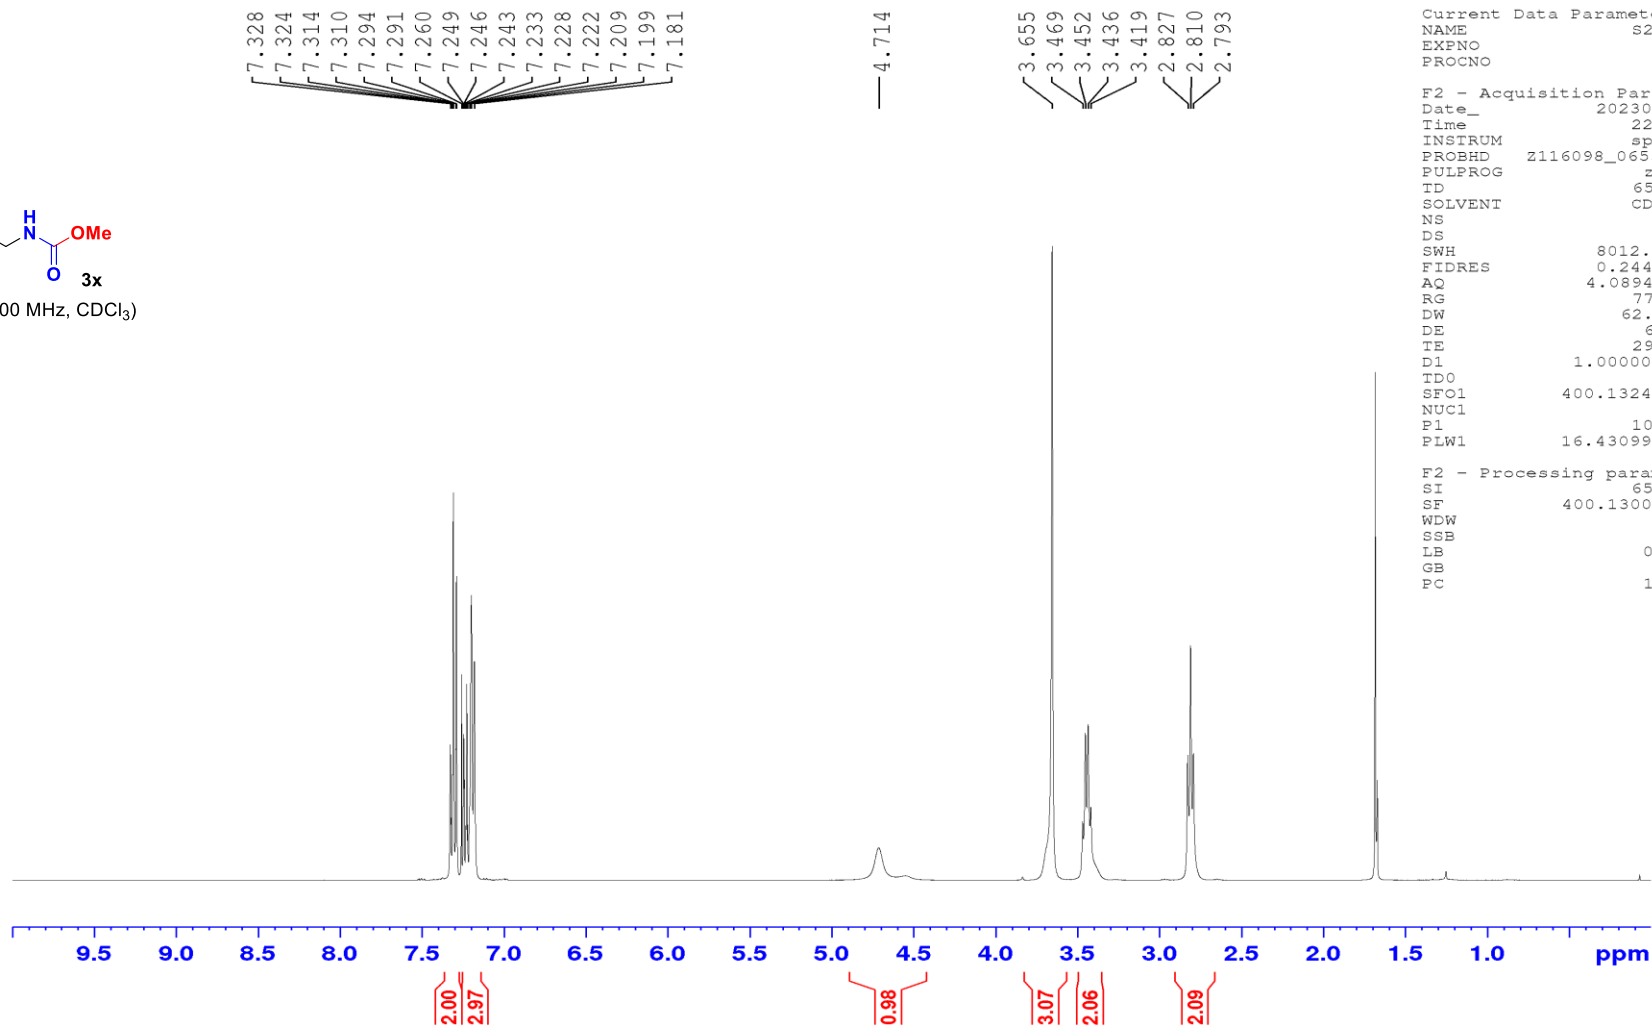

```

Current Data Parameters
NAME          S22-1
EXPNO         1
PROCNO        1

F2 - Acquisition Parameters
Date_         20230718
Time_         22.53 h
INSTRUM       spect
PROBHD        Z116098_0653 (
PULPROG       zg30
ID            65536
SOLVENT       CDCl3
NS            16
DS            2
SWH           8012.820 Hz
FIDRES        0.244532 Hz
AQ            4.0894465 sec
RG            77.68
DW            62.400 usec
DE            6.50 usec
TE            292.5 K
D1            1.00000000 sec
TDO           1
SFO1          400.1324708 MHz
NUC1          1H
P1            10.00 usec
PLW1          16.43099976 W

F2 - Processing parameters
SI            65536
SF            400.1300098 MHz
WDW           EM
SSB           0
LB            0.30 Hz
GB            0
PC            1.00
  
```

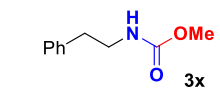

<sup>13</sup>C NMR (100 MHz, CDCl<sub>3</sub>)

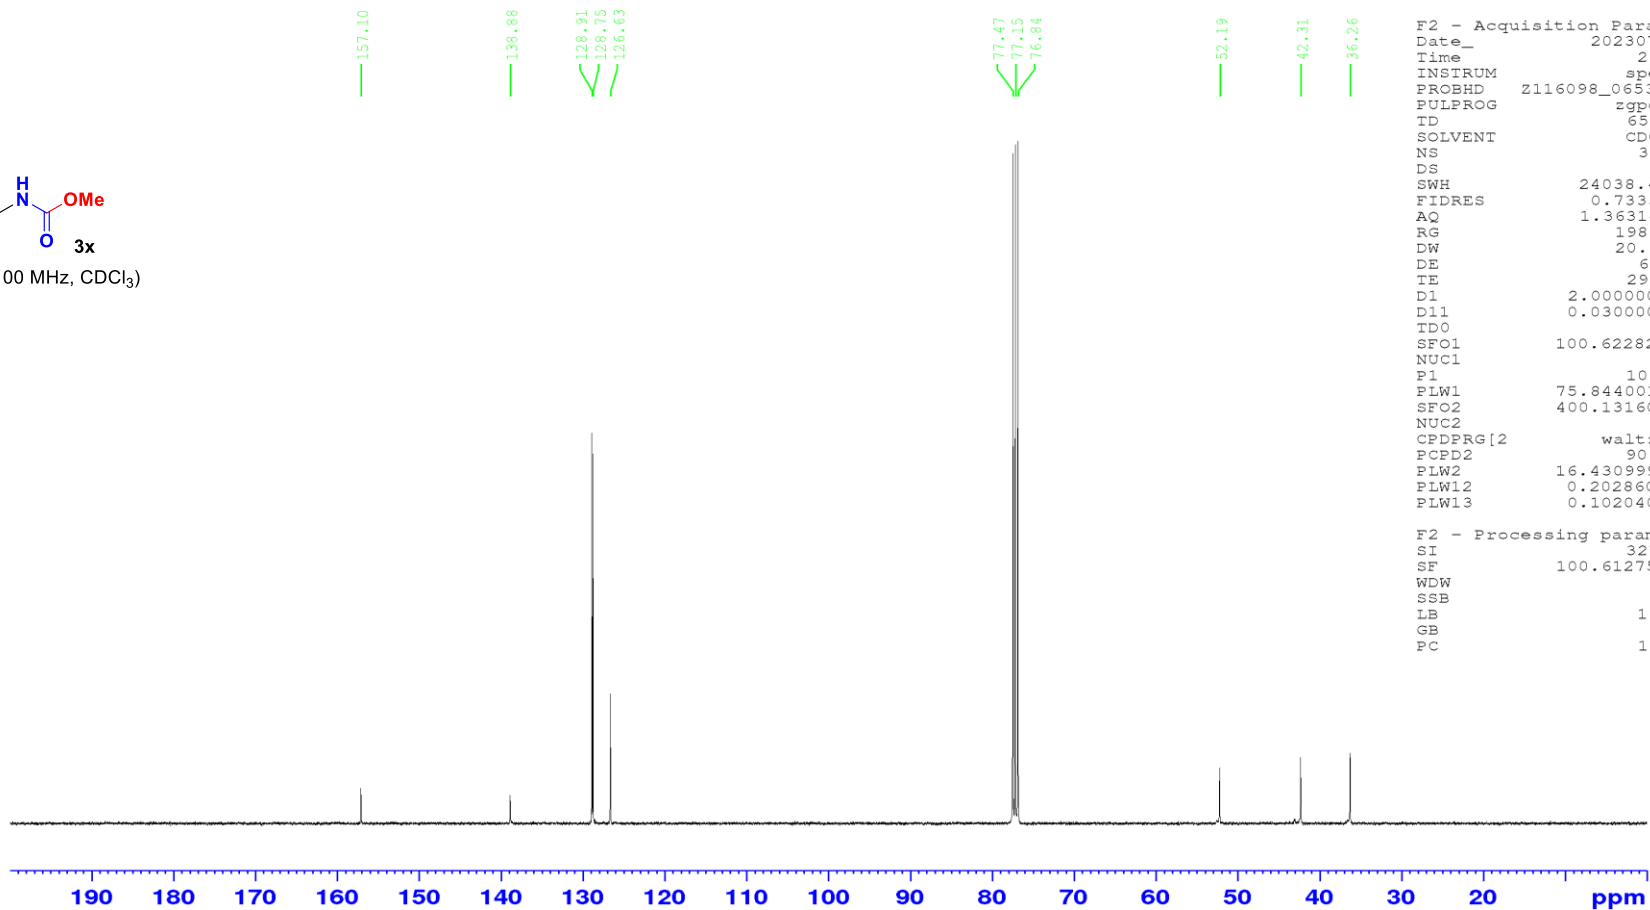

Current Data Parameters  
NAME S22-1  
EXPNO 2  
PROCNO 1

F2 - Acquisition Parameters  
Date\_ 20230719  
Time 2.05 h  
INSTRUM spect  
PROBHD Z116098\_0653 (  
PULPROG zgpg30  
TD 65536  
SOLVENT CDCl3  
NS 3333  
DS 4  
SWH 24038.461 Hz  
FIDRES 0.733596 Hz  
AQ 1.3631488 sec  
RG 198.36  
DW 20.800 usec  
DE 6.50 usec  
TE 293.2 K  
D1 2.00000000 sec  
D11 0.03000000 sec  
TD0 1  
SFO1 100.6228298 MHz  
NUC1 13C  
P1 10.00 usec  
PLW1 75.84400177 W  
SFO2 400.1316005 MHz  
NUC2 1H  
CPDPRG[2] waltz16  
PCPD2 90.00 usec  
PLW2 16.43099976 W  
PLW12 0.20286000 W  
PLW13 0.10204000 W

F2 - Processing parameters  
SI 32768  
SF 100.6127586 MHz  
WDW EM  
SSB 0  
LB 1.00 Hz  
GB 0  
PC 1.40

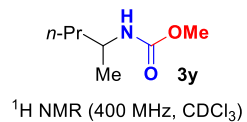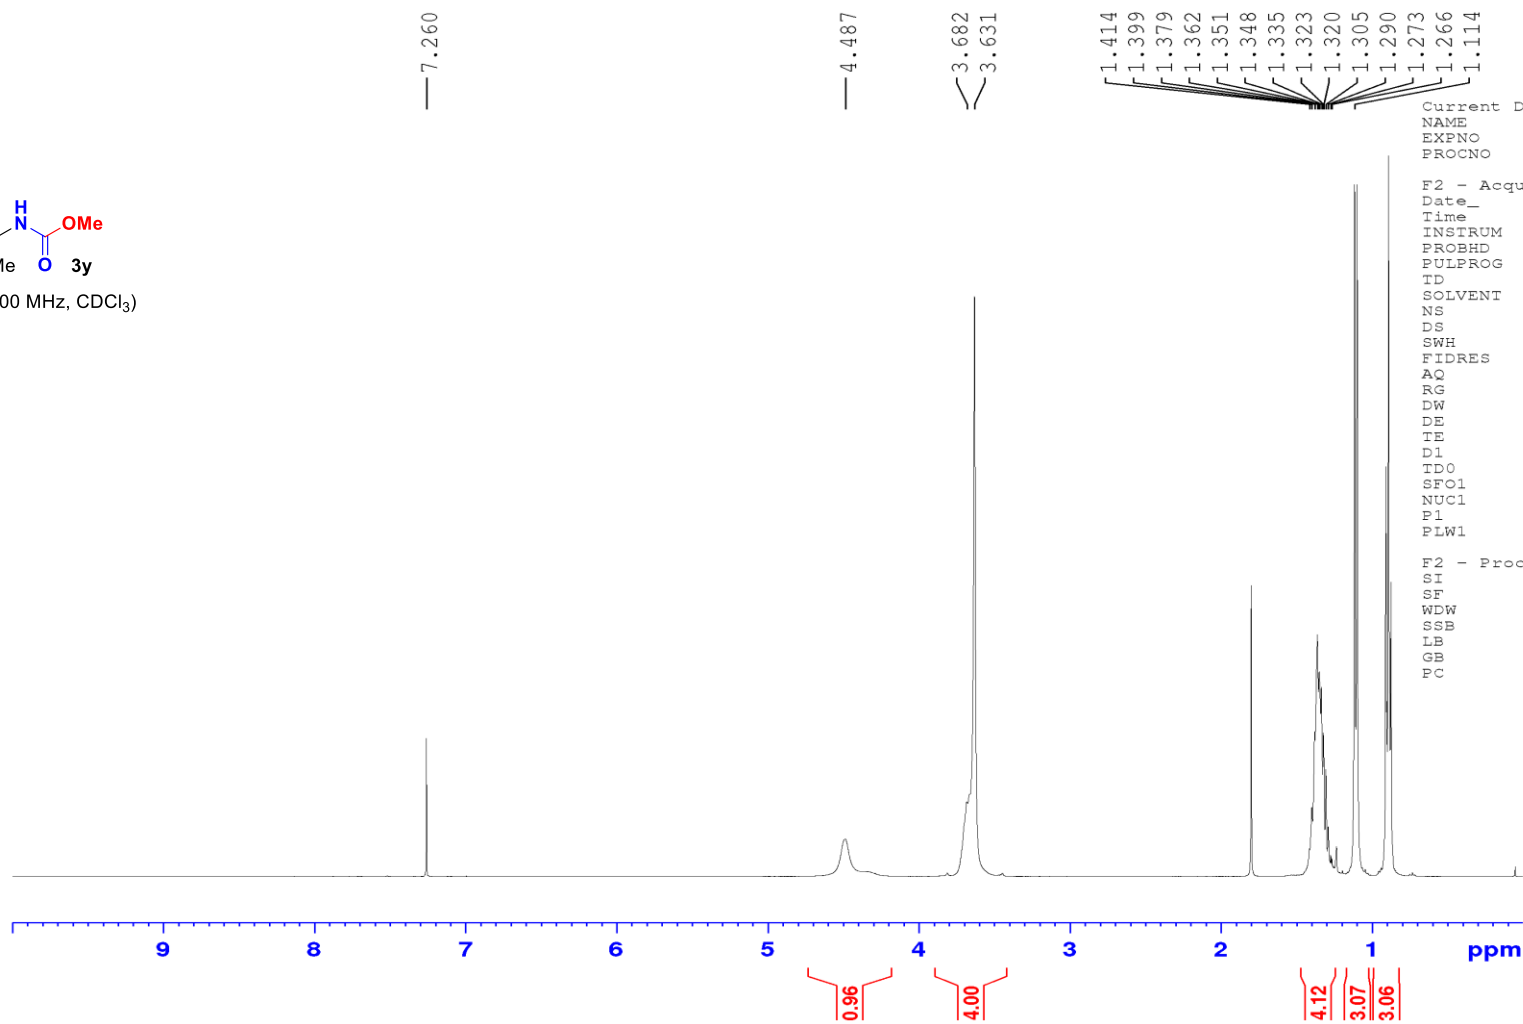

```

Current Data Parameters
NAME          S18
EXPNO         1
PROCNO        1

F2 - Acquisition Parameters
Date_         20221006
Time          22.50 h
INSTRUM       spect
PROBHD        z116098_0653 (
PULPROG       zg30
TD            65536
SOLVENT       CDCl3
NS            2
DS            2
SWH           8012.820 Hz
FIDRES        0.244532 Hz
AQ            4.0894465 sec
RG            31.9
DW            62.400 usec
DE            6.50 usec
TE            294.0 K
D1            1.00000000 sec
TDO           1
SFO1          400.1324708 MHz
NUC1          1H
P1            10.00 usec
PLW1          16.43099976 W

F2 - Processing parameters
SI            65536
SF            400.1300094 MHz
WDW           EM
SSB           0
LB            0.30 Hz
GB            0
PC            1.00
  
```

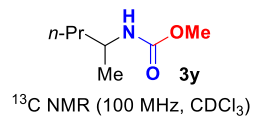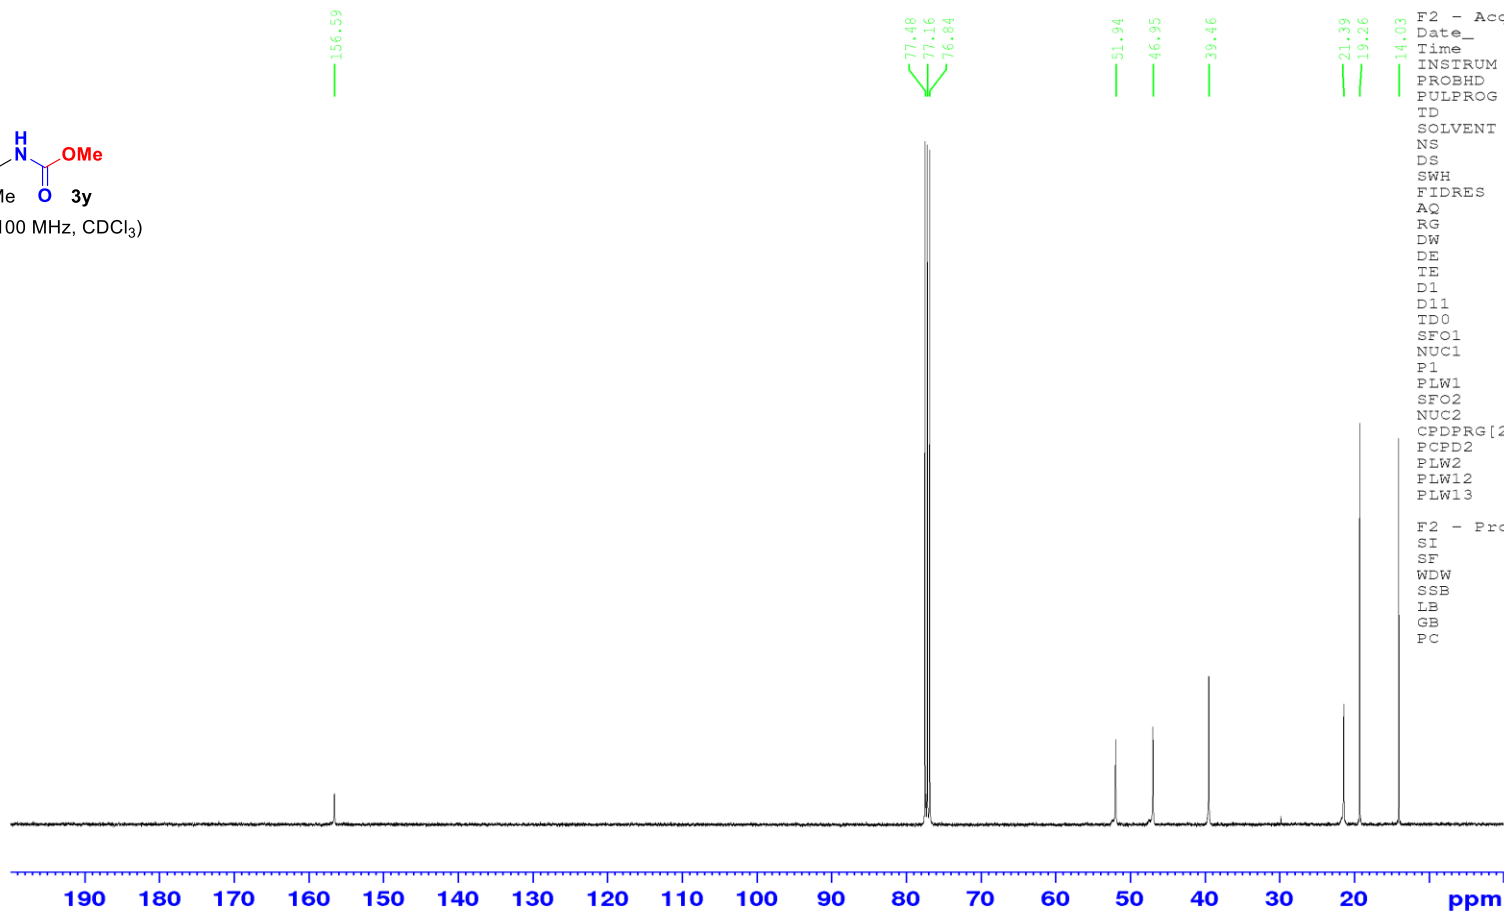

```

Current Data Parameters
NAME           S18
EXPNO          2
PROCNO         1

F2 - Acquisition Parameters
Date_          20221007
Time           6.46 h
INSTRUM        spect
PROBHD         Z116098_0653 (
PULPROG        zgpg30
TD             65536
SOLVENT        CDCl3
NS             2333
DS             4
SWH            24038.461 Hz
FIDRES         0.733596 Hz
AQ             1.3631488 sec
RG             198.36
DW            20.800 usec
DE             6.50 usec
TE             294.9 K
D1            2.00000000 sec
D11           0.03000000 sec
TD0            1
SFO1          100.6228298 MHz
NUC1          13C
P1            10.00 usec
PLW1          75.84400177 W
SFO2          400.1316005 MHz
NUC2          1H
CPDPRG[2]     waltz16
PCPD2         90.00 usec
PLW2          16.43099976 W
PLW12         0.20286000 W
PLW13         0.10204000 W

F2 - Processing parameters
SI            32768
SF            100.6127572 MHz
WDW           EM
SSB           0
LB            1.00 Hz
GB            0
PC            1.40
  
```

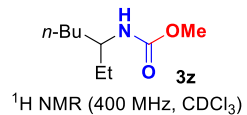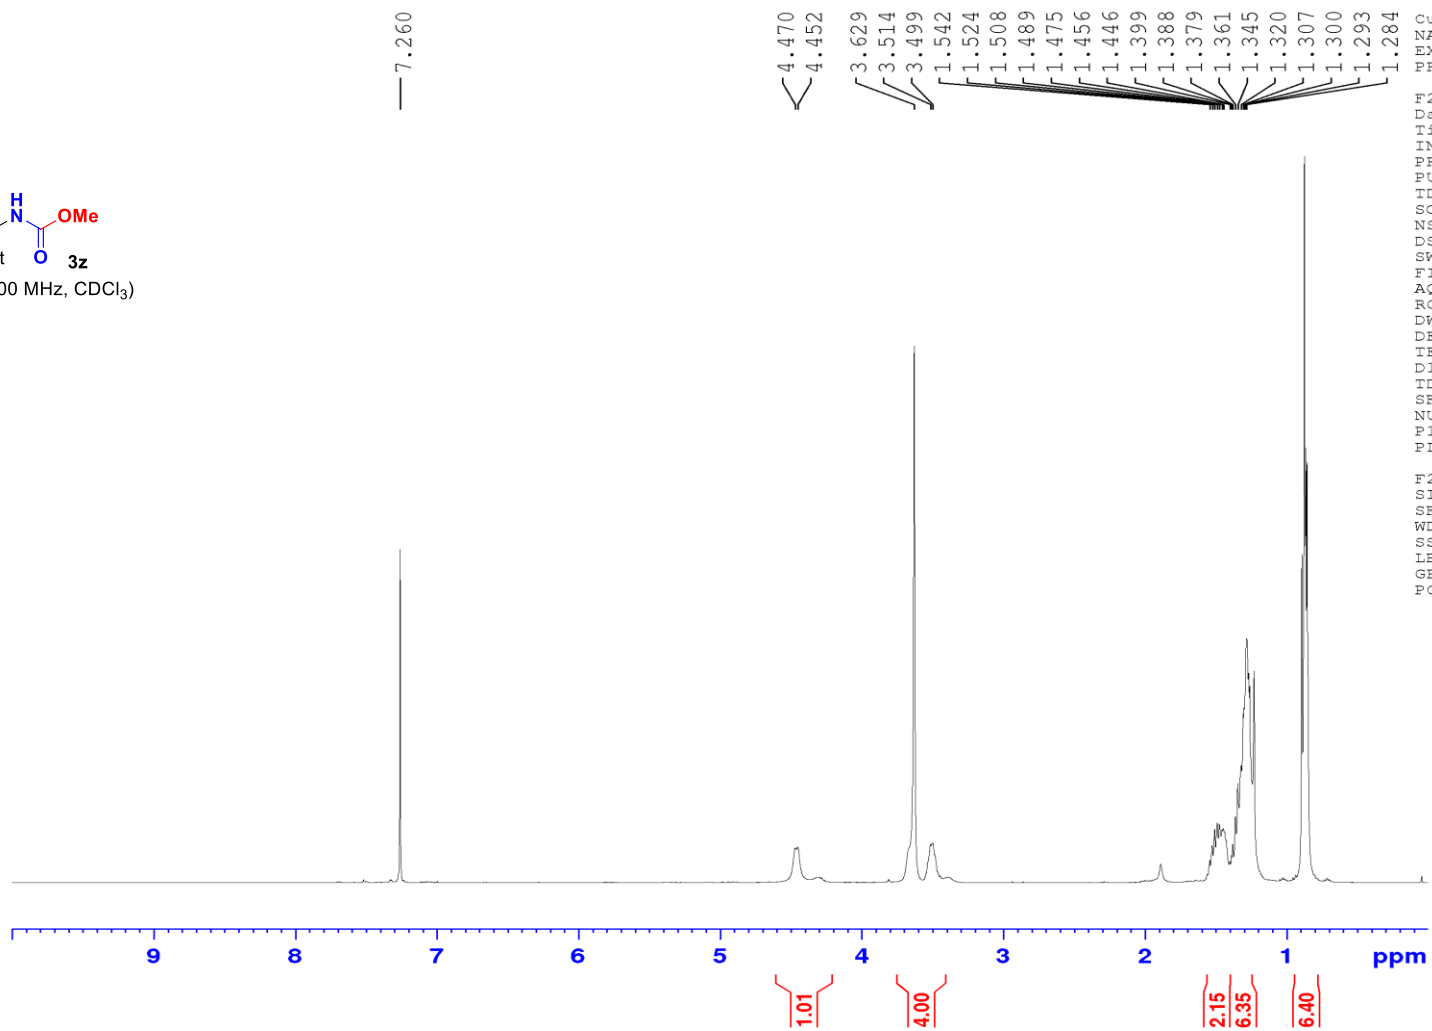

Current Data Parameters  
 NAME S15  
 EXPNO 1  
 PROCNO 1  
 F2 - Acquisition Parameters  
 Date\_ 20220902  
 Time 21.55 h  
 INSTRUM spect  
 PROBHD Z116098\_0653 (  
 PULPROG zg30  
 TD 65536  
 SOLVENT CDCl3  
 NS 16  
 DS 2  
 SWH 8012.820 Hz  
 FIDRES 0.244532 Hz  
 AQ 4.0894465 sec  
 RG 31.9  
 DW 62.400 usec  
 DE 6.50 usec  
 TE 294.4 K  
 D1 1.00000000 sec  
 TD0 1  
 SF01 400.1324708 MHz  
 NUC1 1H  
 P1 10.00 usec  
 PLW1 16.43099976 W  
 F2 - Processing parameters  
 SI 65536  
 SF 400.1300097 MHz  
 WDW EM  
 SSB 0  
 LB 0.30 Hz  
 GB 0  
 PC 1.00

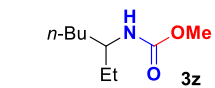

<sup>13</sup>C NMR (100 MHz, CDCl<sub>3</sub>)

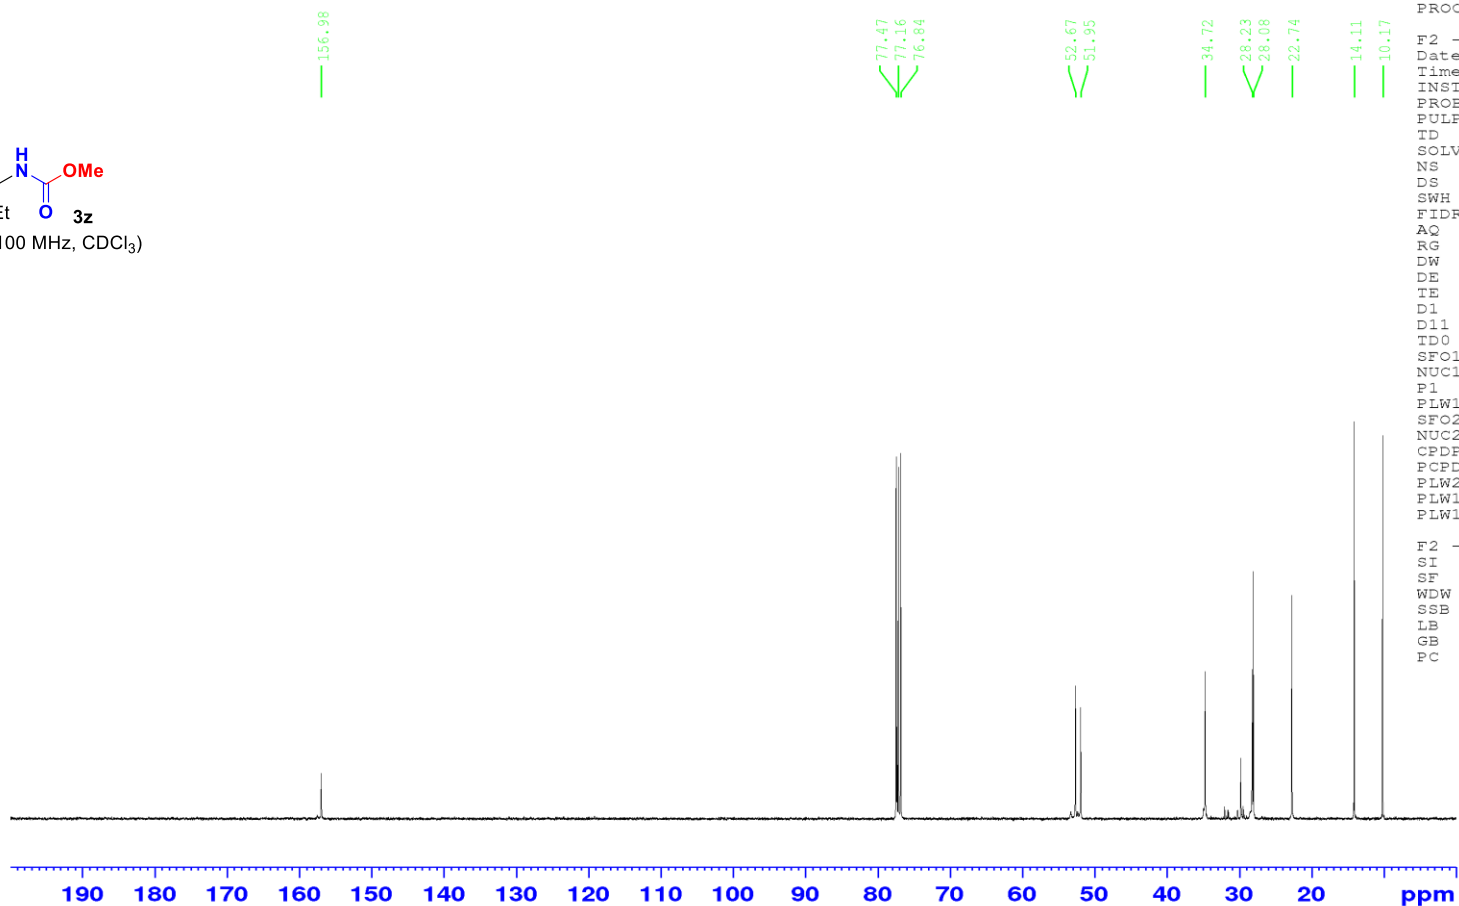

Current Data Parameters  
 NAME S15  
 EXPNO 2  
 PROCNO 1

F2 - Acquisition Parameters  
 Date\_ 20220902  
 Time 22.55 h  
 INSTRUM spect  
 PROBHD Z116098\_0653 (  
 PULPROG zgpg30  
 TD 65536  
 SOLVENT CDCl3  
 NS 1024  
 DS 4  
 SWH 24038.461 Hz  
 FIDRES 0.733596 Hz  
 AQ 1.3631488 sec  
 RG 198.36  
 DW 20.800 usec  
 DE 6.50 usec  
 TE 294.9 K  
 D1 2.00000000 sec  
 D11 0.03000000 sec  
 TD0 1  
 SFO1 100.6228298 MHz  
 NUC1 13C  
 P1 10.00 usec  
 PLW1 75.84400177 W  
 SFO2 400.1316005 MHz  
 NUC2 1H  
 CPDPRG[2] waltz16  
 PCPD2 90.00 usec  
 PLW2 16.43099976 W  
 PLW12 0.20286000 W  
 PLW13 0.10204000 W

F2 - Processing parameters  
 SI 32768  
 SF 100.6127583 MHz  
 WDW EM  
 SSB 0  
 LB 1.00 Hz  
 GB 0  
 PC 1.40

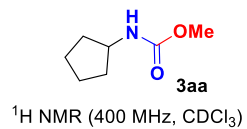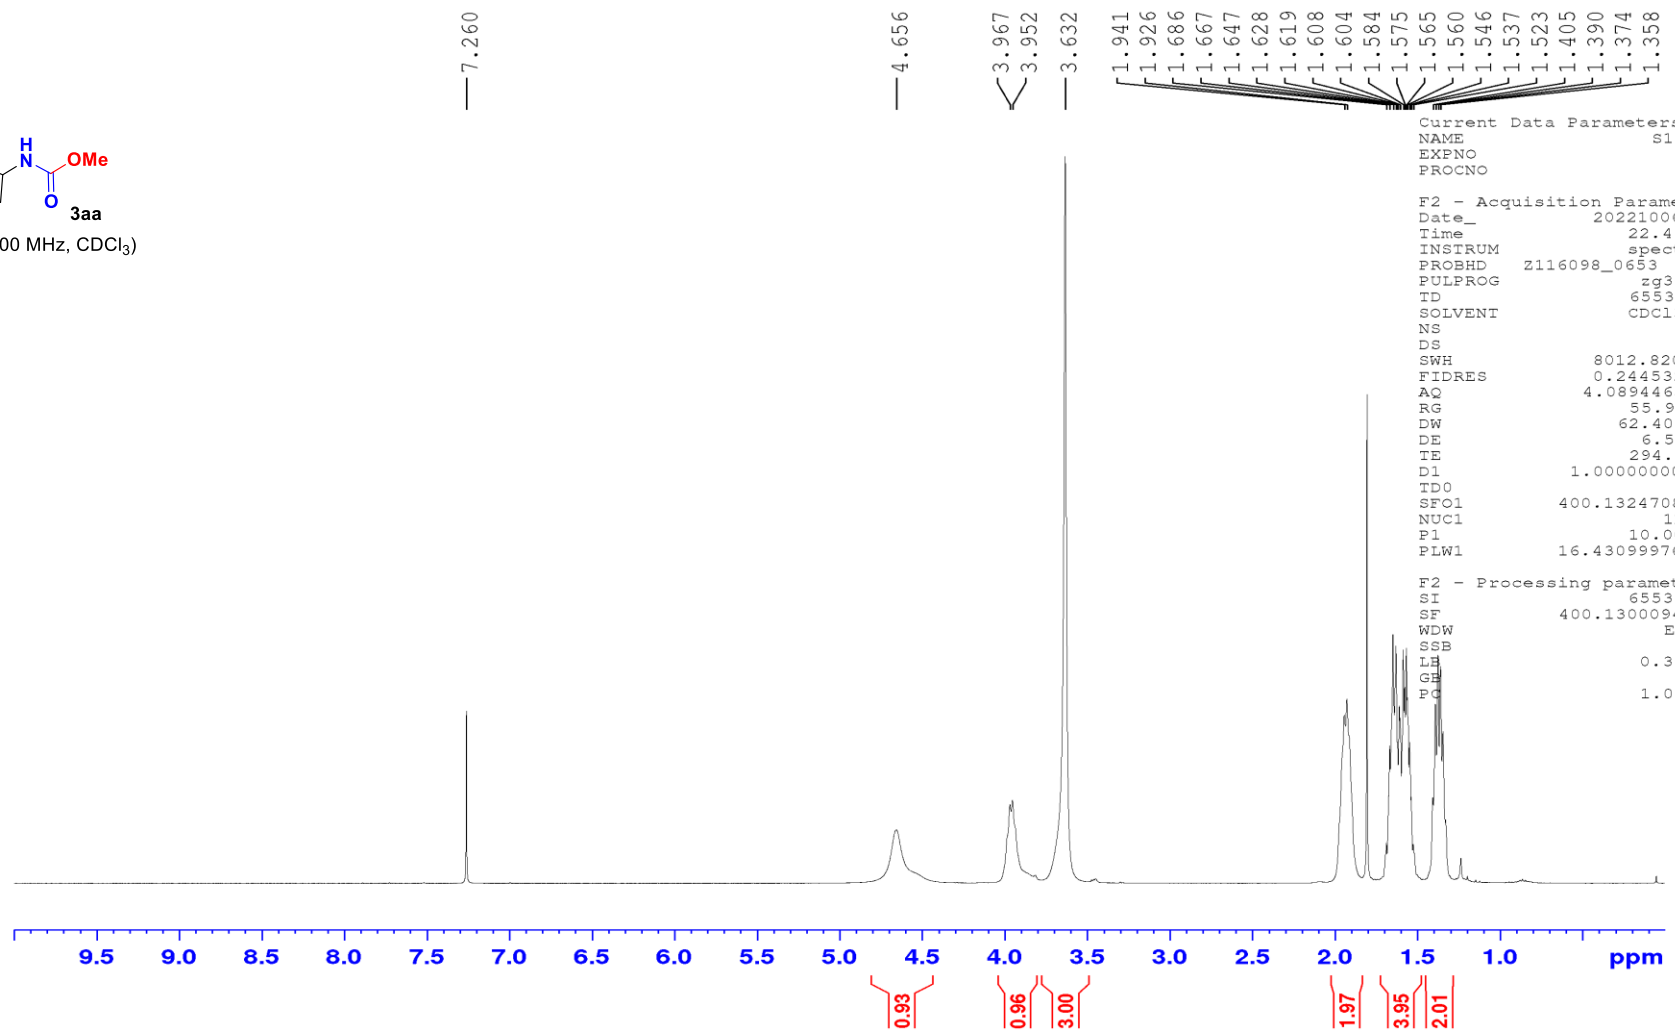

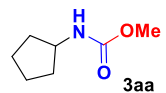

<sup>13</sup>C NMR (100 MHz, CDCl<sub>3</sub>)

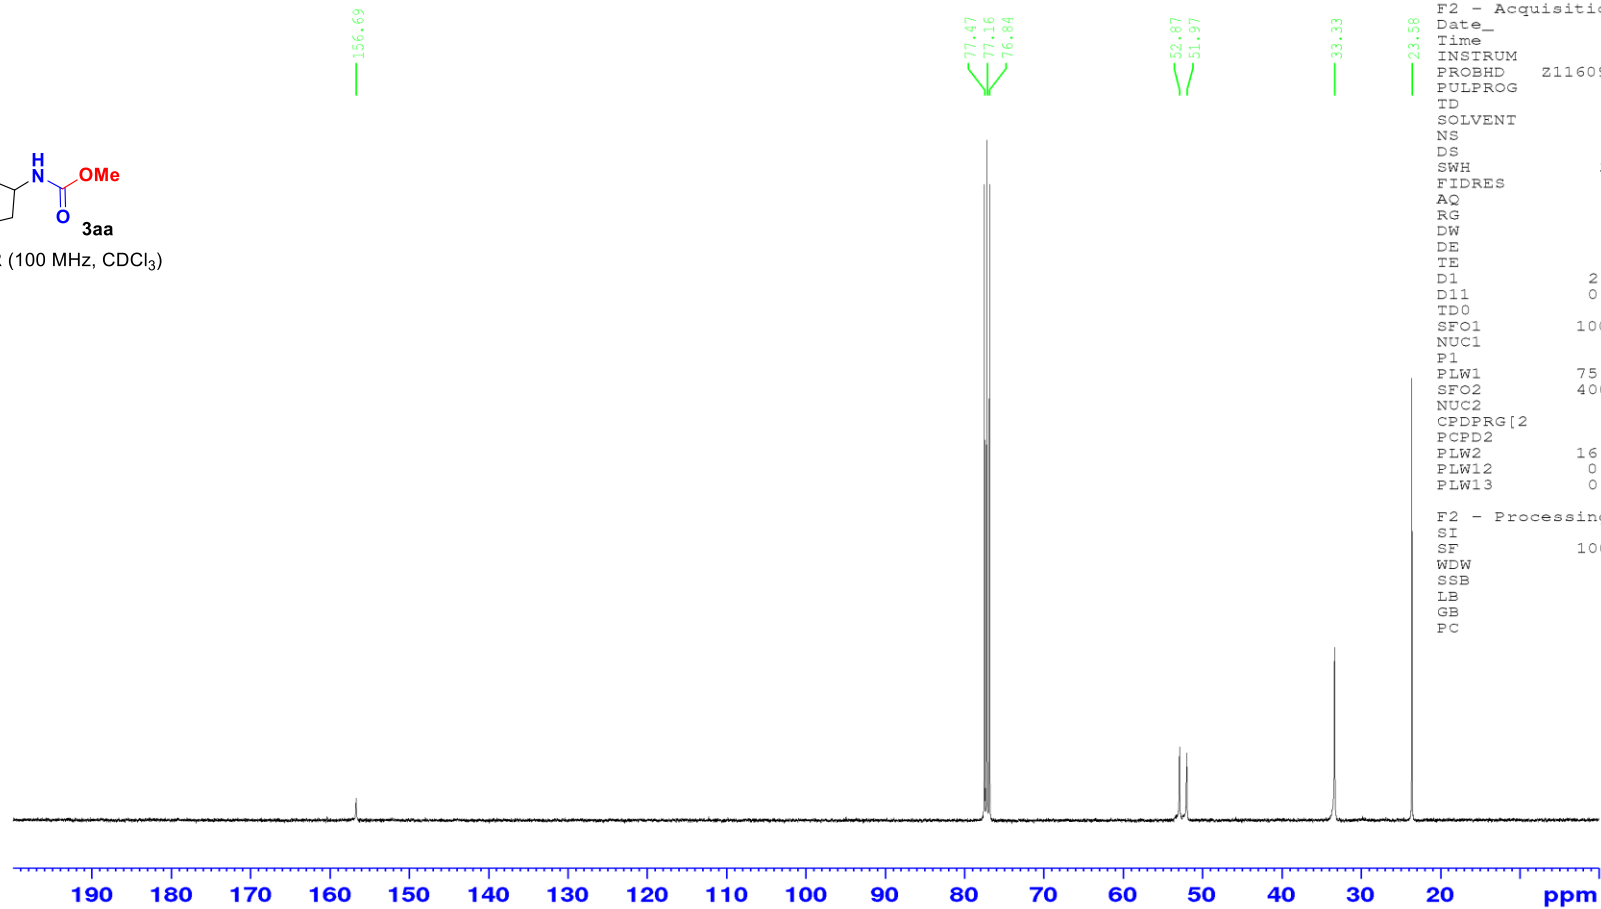

Current Data Parameters  
NAME S17  
EXPNO 2  
PROCNO 1

F2 - Acquisition Parameters  
Date\_ 20221007  
Time 4.29 h  
INSTRUM spect  
PROBHD Z116098\_0653 (  
PULPROG zgpg30  
TD 65536  
SOLVENT CDCl3  
NS 2333  
DS 4  
SWH 24038.461 Hz  
FIDRES 0.733596 Hz  
AQ 1.3631488 sec  
RG 198.36  
DW 20.800 usec  
DE 6.50 usec  
TE 295.0 K  
D1 2.00000000 sec  
D11 0.03000000 sec  
TD0 1  
SFO1 100.6228298 MHz  
NUC1 13C  
P1 10.00 usec  
PLW1 75.84400177 W  
SFO2 400.1316005 MHz  
NUC2 1H  
CPDPRG[2] waltz16  
PCPD2 90.00 usec  
PLW2 16.43099976 W  
PLW12 0.20286000 W  
PLW13 0.10204000 W

F2 - Processing parameters  
SI 32768  
SF 100.6127579 MHz  
WDW EM  
SSB 0  
LB 1.00 Hz  
GB 0  
PC 1.40



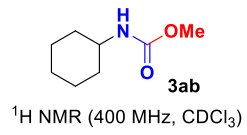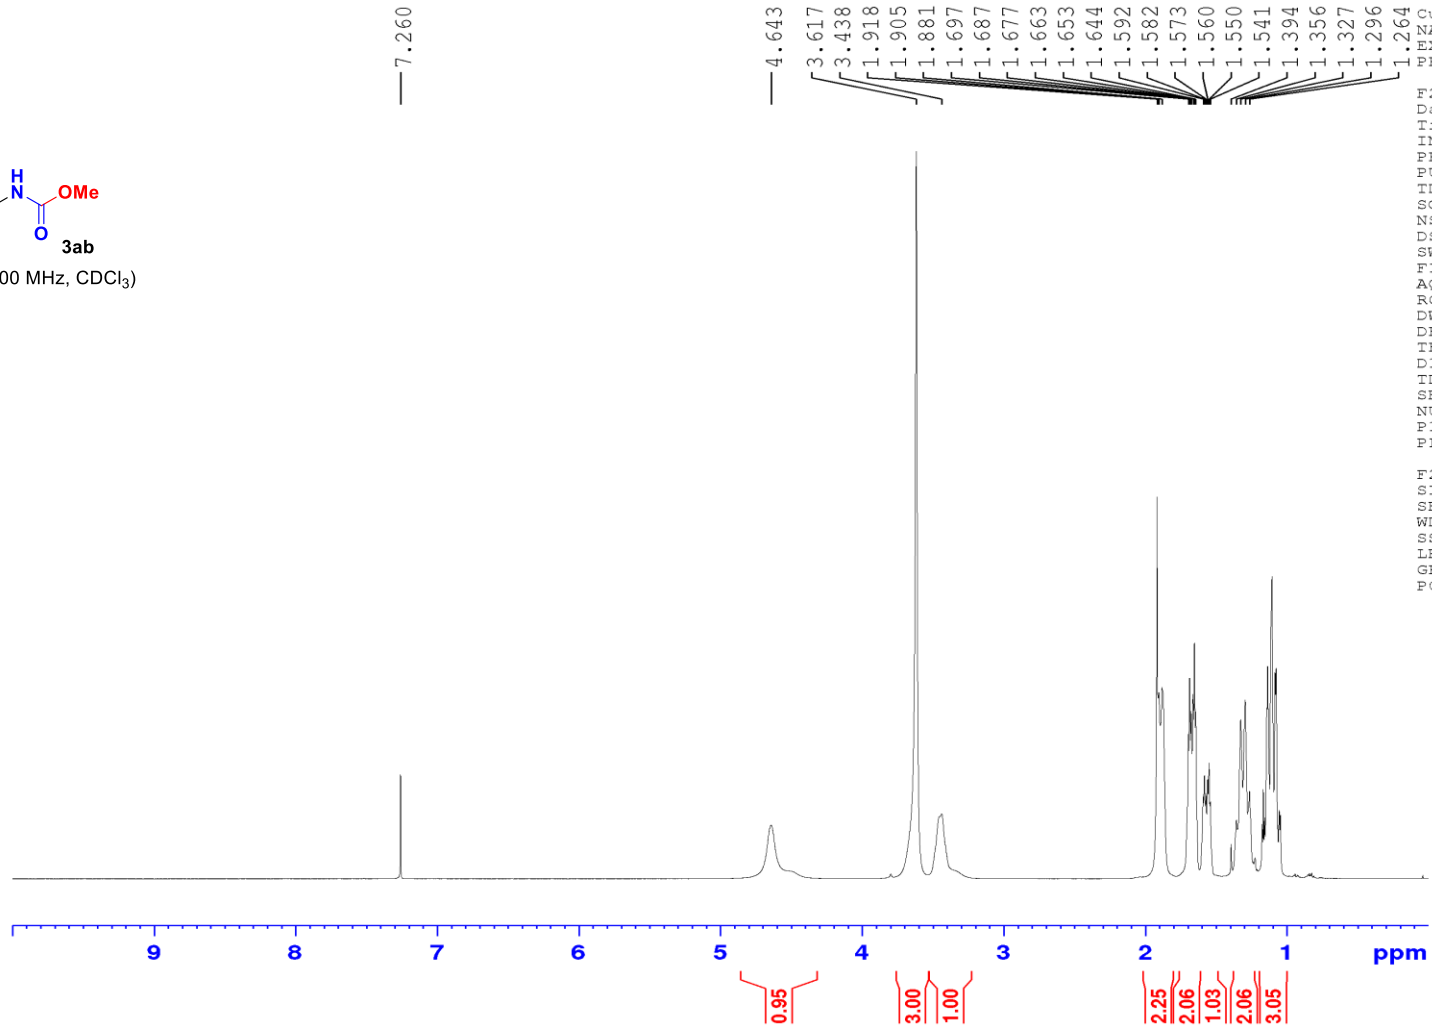

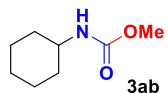

**3ab**

<sup>13</sup>C NMR (100 MHz, CDCl<sub>3</sub>)

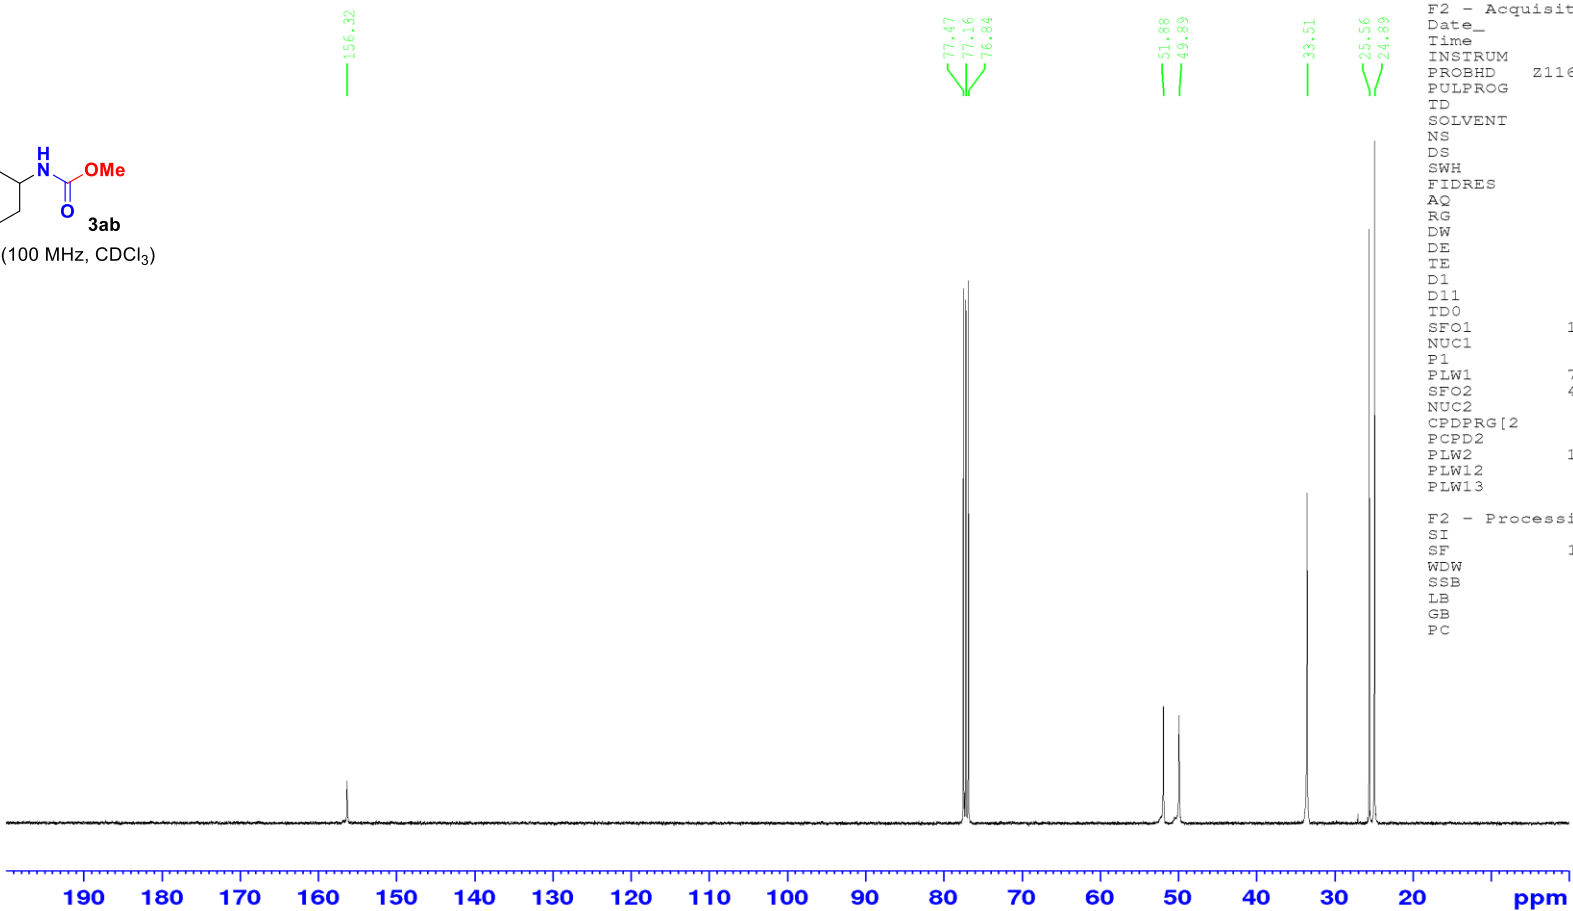

Current Data Parameters  
NAME S16  
EXPNO 2  
PROCNO 1

F2 - Acquisition Parameters  
Date\_ 20220923  
Time 1.38 h  
INSTRUM spect  
PROBHD Z116098\_0653 (  
PULPROG zgpg30  
TD 65536  
SOLVENT CDCl3  
NS 1888  
DS 4  
SWH 24038.461 Hz  
FIDRES 0.733596 Hz  
AQ 1.3631488 sec  
RG 198.36  
DW 20.800 usec  
DE 6.50 usec  
TE 295.2 K  
D1 2.00000000 sec  
D11 0.03000000 sec  
TD0 1  
SFO1 100.6228298 MHz  
NUC1 13C  
P1 10.00 usec  
PLW1 75.84400177 W  
SFO2 400.1316005 MHz  
NUC2 1H  
CPDPRG[2] waltz16  
PCPD2 90.00 usec  
PLW2 16.43099976 W  
PLW12 0.20286000 W  
PLW13 0.10204000 W

F2 - Processing parameters  
SI 32768  
SF 100.6127597 MHz  
WDW EM  
SSB 0  
LB 1.00 Hz  
GB 0  
PC 1.40

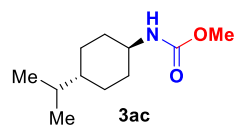

<sup>1</sup>H NMR (400 MHz, CDCl<sub>3</sub>)

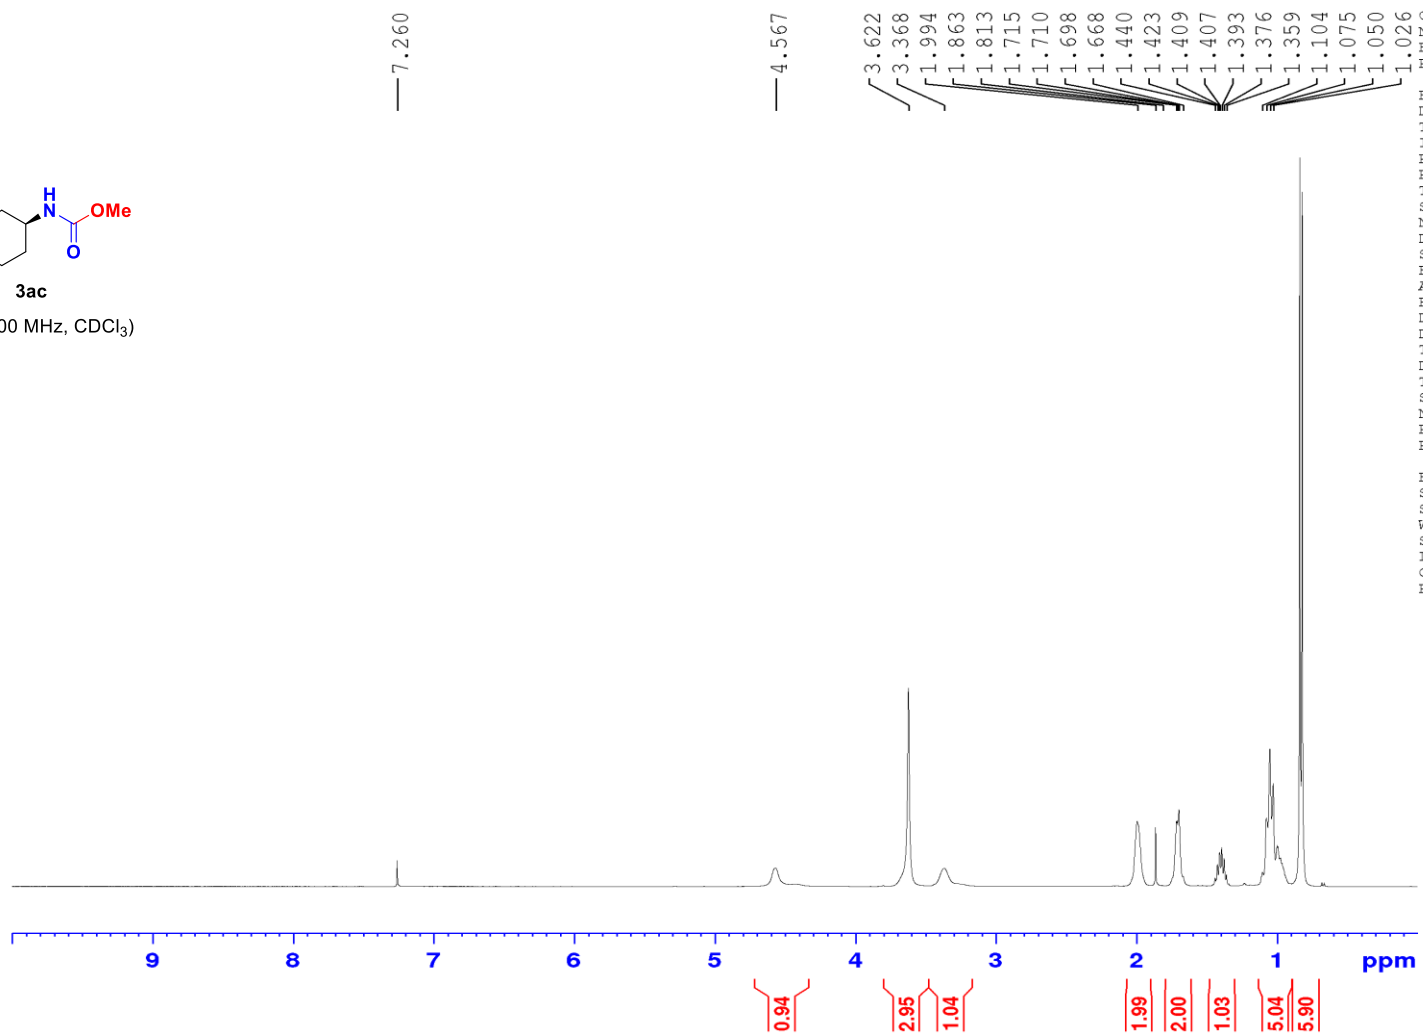

```

Current Data Parameters
NAME          S31
EXPNO         1
PROCNO        1

F2 - Acquisition Parameters
Date_         20221215
Time_         14.40 h
INSTRUM       spect
PROBHD        Z116098_0653 (
PULPROG       zg30
TD            65536
SOLVENT       CDCl3
NS            16
DS            2
SWH           8012.820 Hz
FIDRES        0.244532 Hz
AQ            4.0894465 sec
RG            31.9
DW            62.400 usec
DE            6.50 usec
TE            292.6 K
D1            1.00000000 sec
TD0           1
SFO1          400.1324708 MHz
NUC1          1H
P1            10.00 usec
PLW1          16.43099976 W

F2 - Processing parameters
SI            65536
SF            400.1300097 MHz
WDW           EM
SSB           0
LB            0.30 Hz
GB            0
PC            1.00
  
```

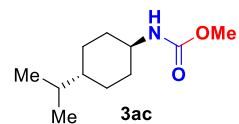

<sup>13</sup>C NMR (100 MHz, CDCl<sub>3</sub>)

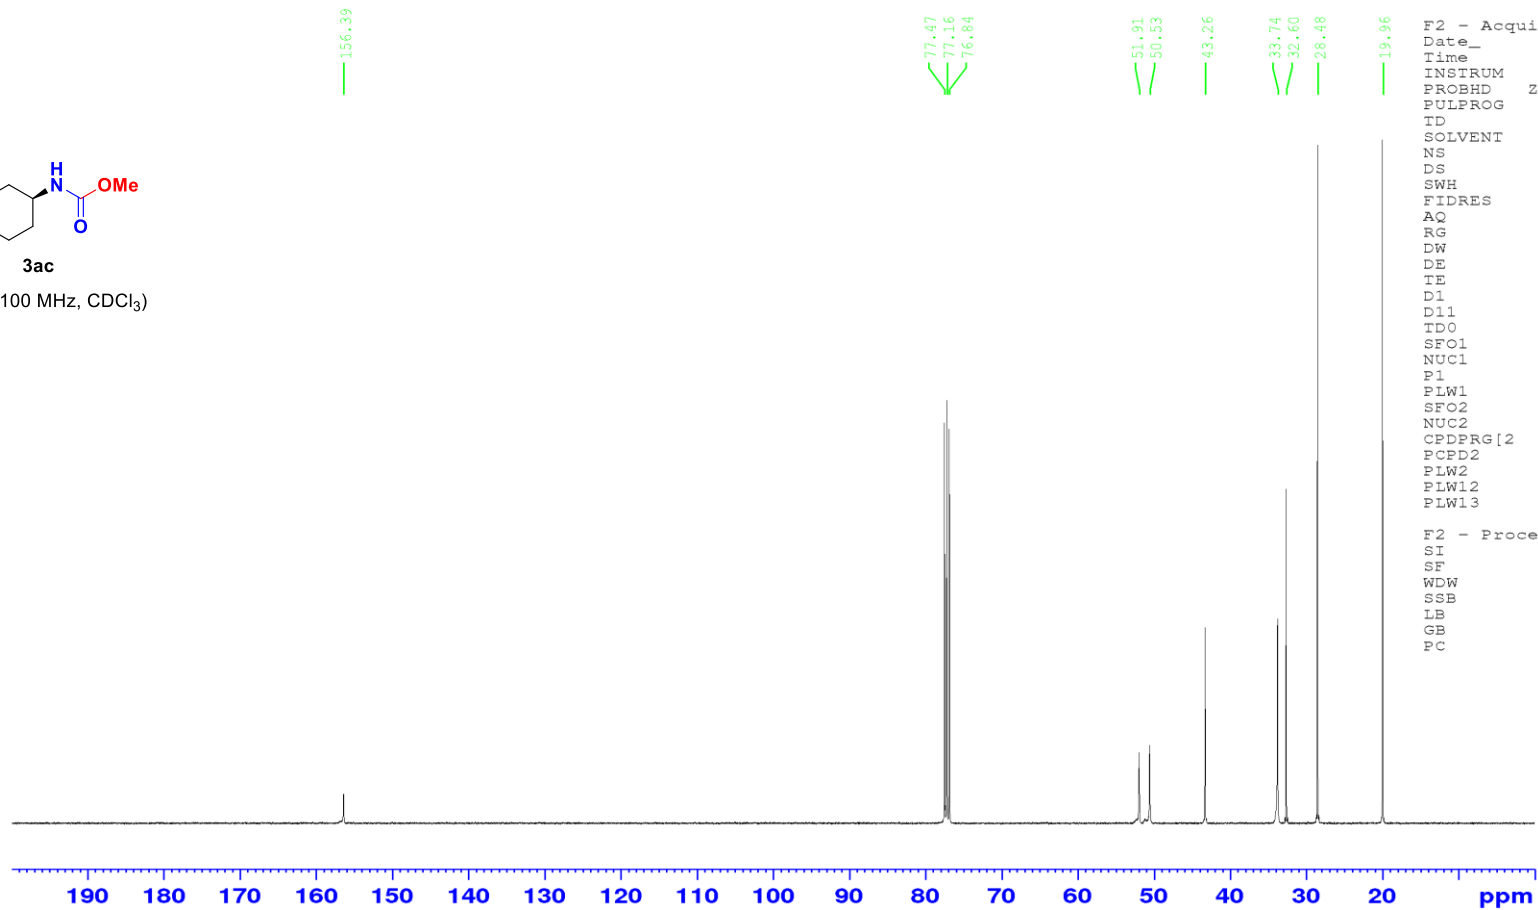

Current Data Parameters  
NAME S31  
EXPNO 2  
PROCNO 1

F2 - Acquisition Parameters  
Date\_ 20221215  
Time 17.52 h  
INSTRUM spect  
PROBHD Z116098\_0653 (  
PULPROG zgpg30  
TD 65536  
SOLVENT CDCl3  
NS 3333  
DS 4  
SWH 24038.461 Hz  
FIDRES 0.733596 Hz  
AQ 1.3631488 sec  
RG 198.36  
DW 20.800 usec  
DE 6.50 usec  
TE 293.5 K  
D1 2.00000000 sec  
D11 0.03000000 sec  
TD0 1  
SFO1 100.6228298 MHz  
NUC1 13C  
P1 10.00 usec  
PLW1 75.84400177 W  
SFO2 400.1316005 MHz  
NUC2 1H  
CPDPRG[2] waltz16  
PCPD2 90.00 usec  
PLW2 16.43099976 W  
PLW12 0.20286000 W  
PLW13 0.10204000 W

F2 - Processing parameters  
SI 32768  
SF 100.6127594 MHz  
WDW EM  
SSB 0  
LB 1.00 Hz  
GB 0  
PC 1.40

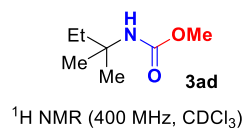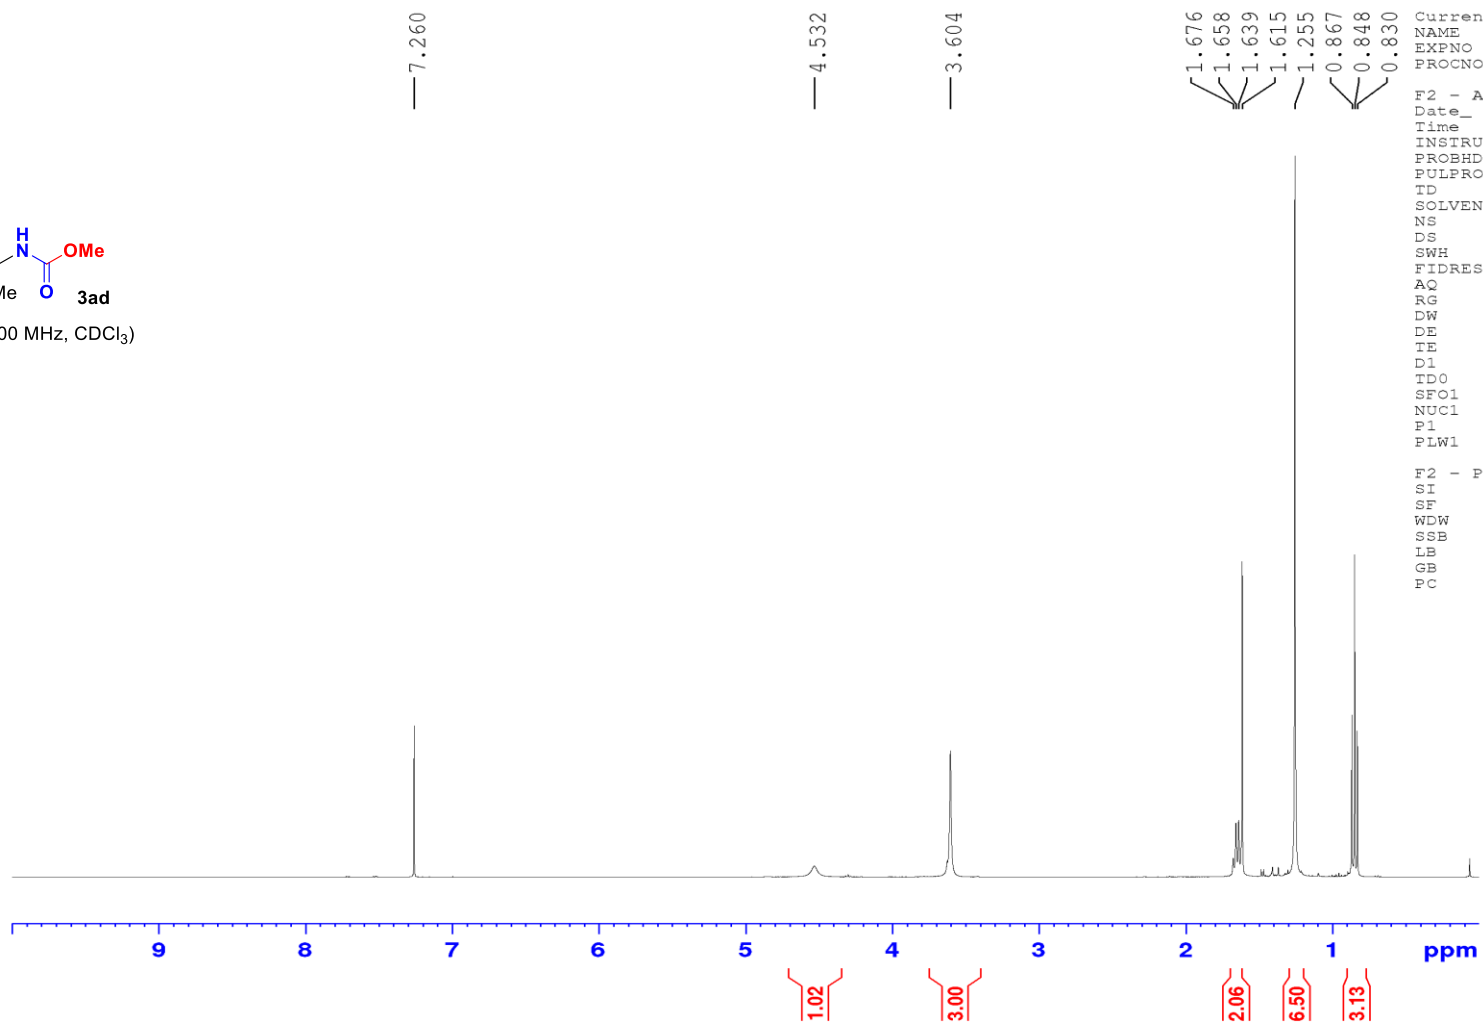

Current Data Parameters  
 NAME S20  
 EXPNO 1  
 PROCNO 1

F2 - Acquisition Parameters  
 Date\_ 20221006  
 Time 22.54 h  
 INSTRUM spect  
 PROBHD Z116098\_0653 (  
 PULPROG zg30  
 TD 65536  
 SOLVENT CDCl3  
 NS 8  
 DS 2  
 SWH 8012.820 Hz  
 FIDRES 0.244532 Hz  
 AQ 4.089465 sec  
 RG 103.14  
 DW 62.400 usec  
 DE 6.50 usec  
 TE 294.1 K  
 D1 1.00000000 sec  
 TD0 1  
 SF01 400.1324708 MHz  
 NUC1 1H  
 P1 10.00 usec  
 PLW1 16.43099976 W

F2 - Processing parameters  
 SI 65536  
 SF 400.1300096 MHz  
 WDW EM  
 SSB 0  
 LB 0.30 Hz  
 GB 0  
 PC 1.00

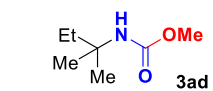

<sup>13</sup>C NMR (100 MHz, CDCl<sub>3</sub>)

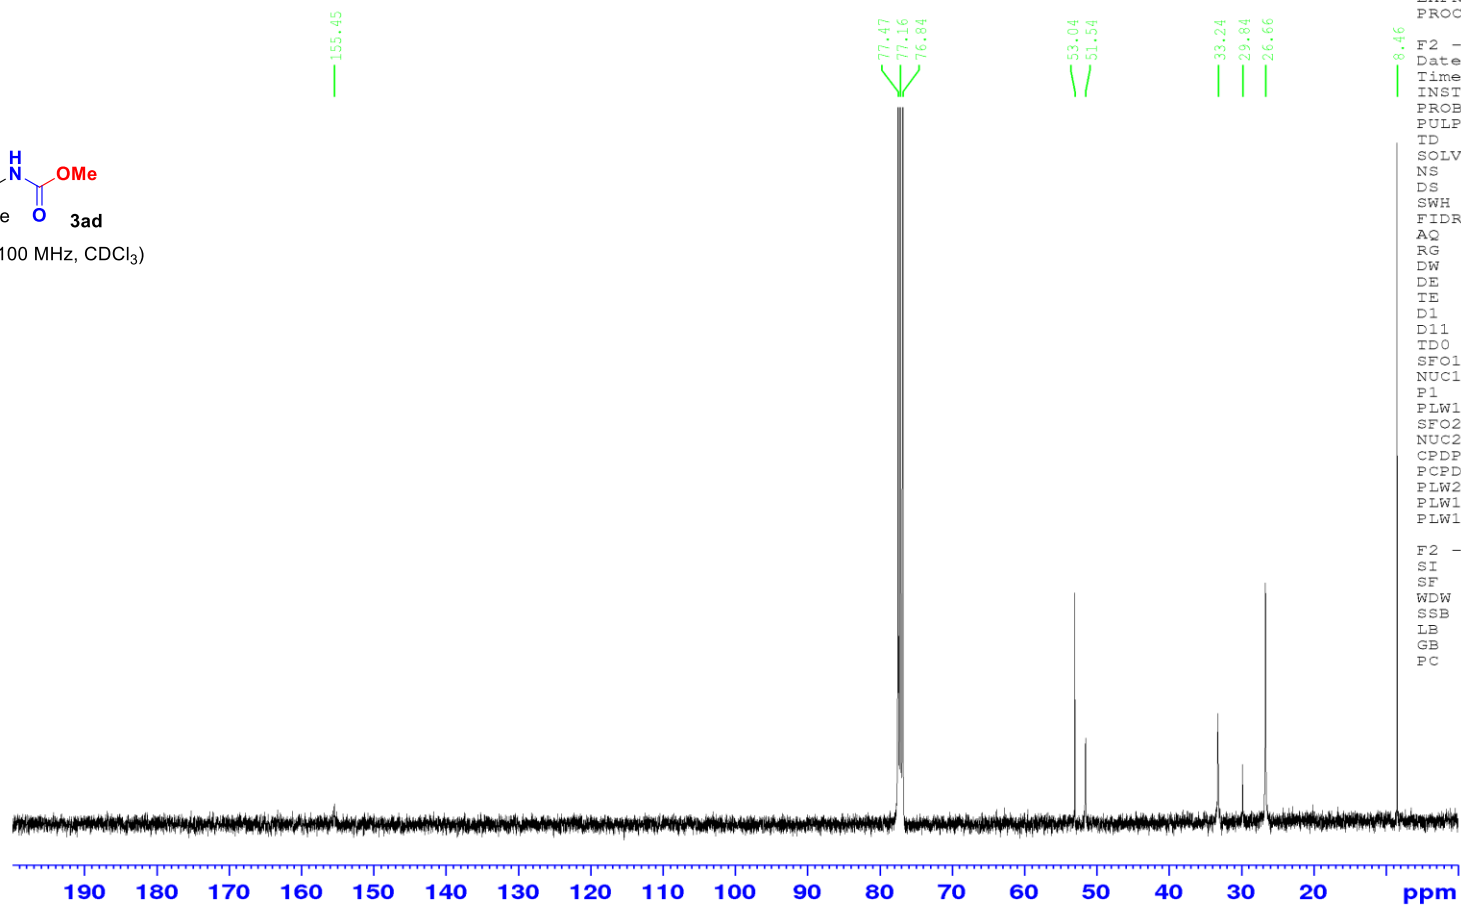

```

Current Data Parameters
NAME          S20
EXPNO         3
PROCNO        1

F2 - Acquisition Parameters
Date_         20221007
Time          2.12 h
INSTRUM       spect
PROBHD        Z116098_0653 (
PULPROG       zgpg30
TD            65536
SOLVENT       CDCl3
NS            3333
DS            4
SWH           24038.461 Hz
FIDRES        0.733596 Hz
AQ            1.3631488 sec
RG            198.36
DW            20.800 usec
DE            6.50 usec
TE            294.7 K
D1            2.00000000 sec
D11           0.03000000 sec
TDO           1
SFO1          100.6228298 MHz
NUC1          13C
P1            10.00 usec
PLW1          75.84400177 W
SFO2          400.1316005 MHz
NUC2          1H
CPDPRG[2]    waltz16
PCPD2         90.00 usec
PLW2          16.43099976 W
PLW12         0.20286000 W
PLW13         0.10204000 W

F2 - Processing parameters
SI            32768
SF            100.6127559 MHz
WDW           EM
SSB           0
LB            1.00 Hz
GB            0
PC            1.40
  
```

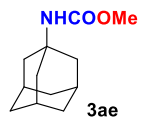

<sup>1</sup>H NMR (400 MHz, CDCl<sub>3</sub>)

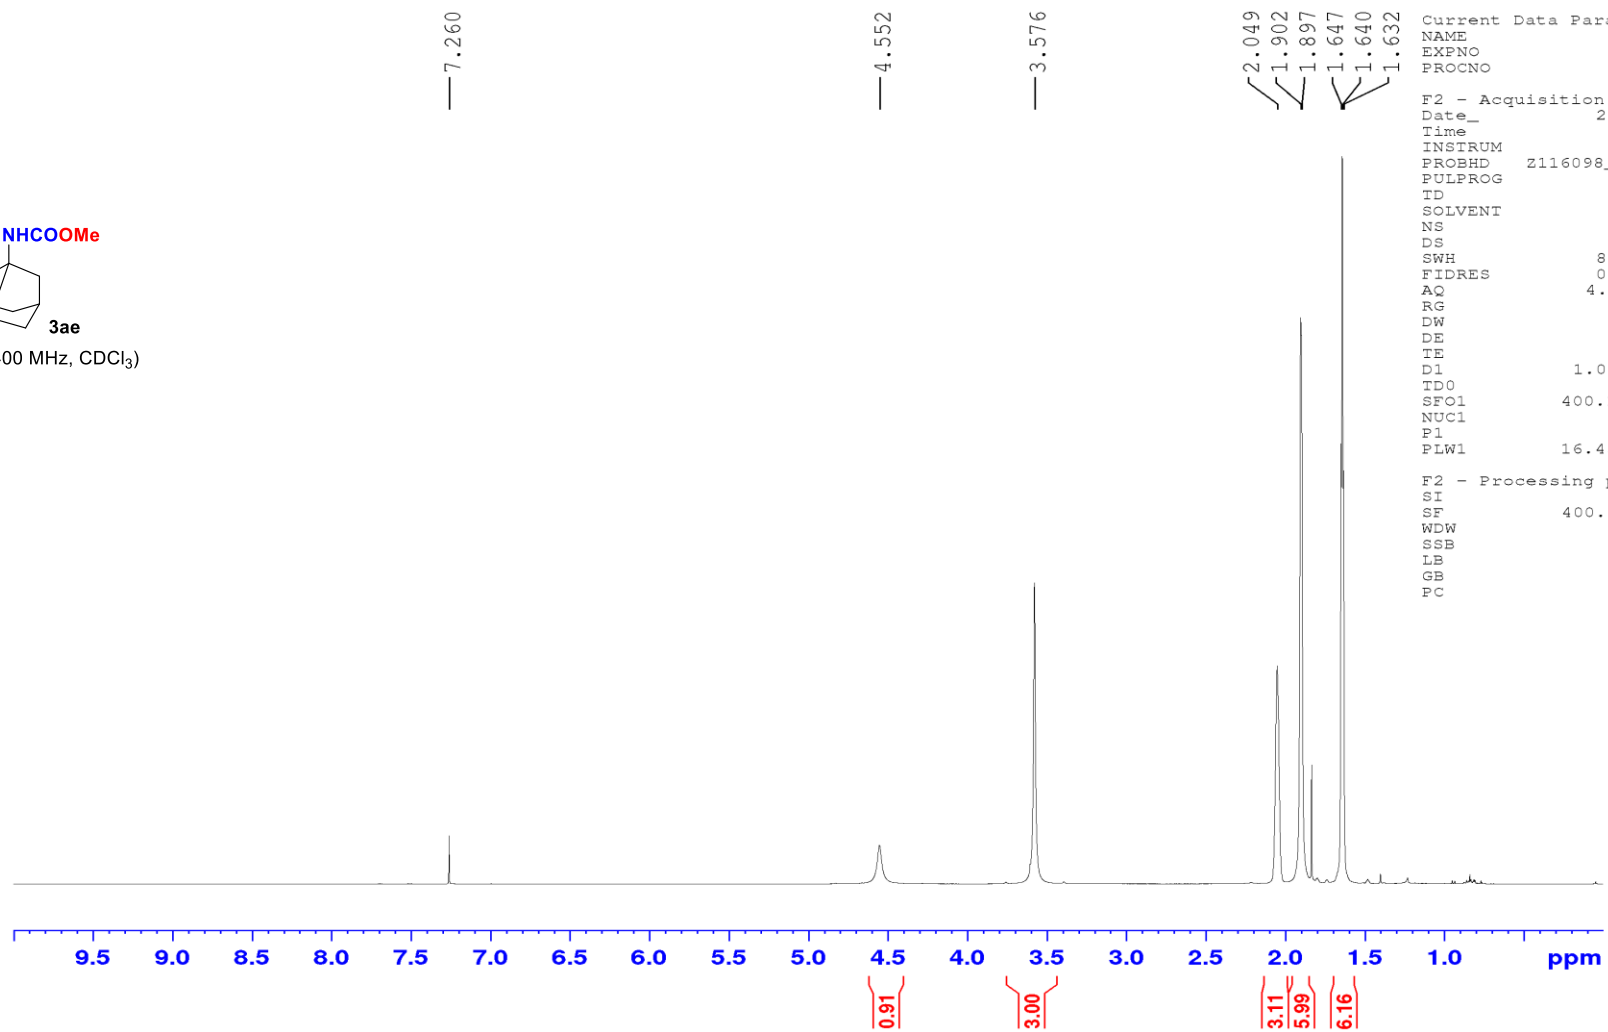

```

Current Data Parameters
NAME          S21
EXPNO         1
PROCNO        1

F2 - Acquisition Parameters
Date_         20221008
Time          20.57 h
INSTRUM       spect
PROBHD        Z116098_0653 (
PULPROG       zg30
TD            65536
SOLVENT       CDCl3
NS            16
DS            2
SWH           8012.820 Hz
FIDRES        0.244532 Hz
AQ            4.0894465 sec
RG            31.9
DW            62.400 usec
DE            6.50 usec
TE            294.4 K
D1            1.00000000 sec
TD0           1
SFO1          400.1324708 MHz
NUC1          1H
P1            10.00 usec
PLW1          16.43099976 W

F2 - Processing parameters
SI            65536
SF            400.1300094 MHz
WDW           EM
SSB           0
LB            0.30 Hz
GB            0
PC            1.00
  
```

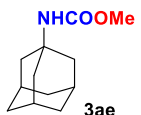

<sup>13</sup>C NMR (100 MHz, CDCl<sub>3</sub>)

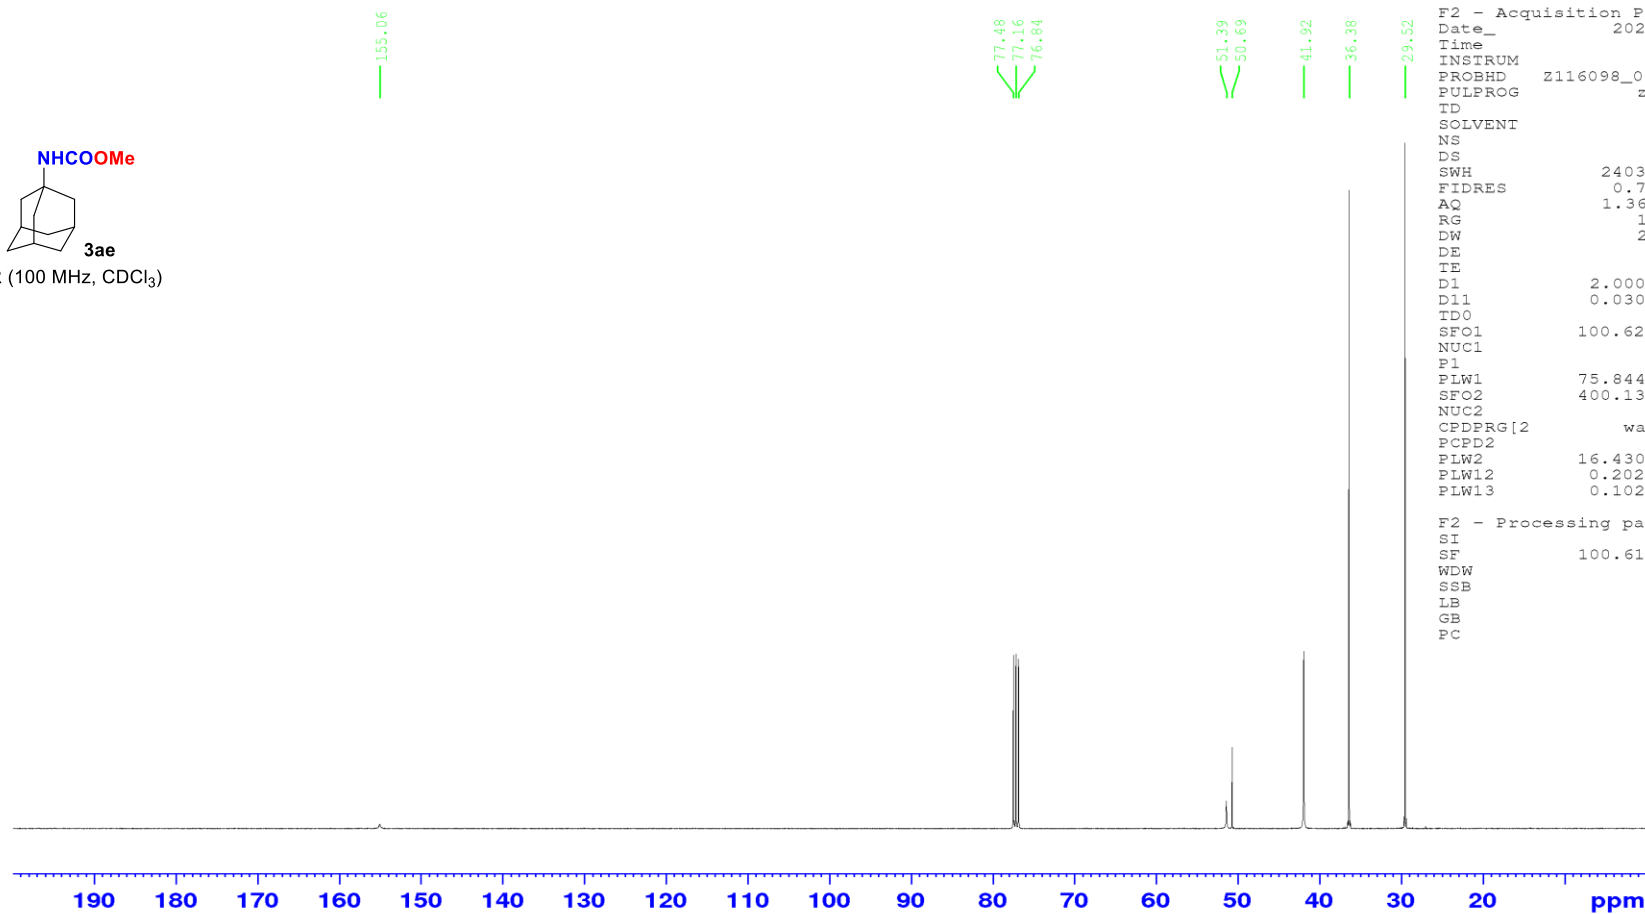

Current Data Parameters  
NAME S21  
EXPNO 2  
PROCNO 1

F2 - Acquisition Parameters  
Date\_ 20221009  
Time 0.40 h  
INSTRUM spect  
PROBHD Z116098\_0653 (  
PULPROG zgpg30  
TD 65536  
SOLVENT CDCl3  
NS 3888  
DS 4  
SWH 24038.461 Hz  
FIDRES 0.733596 Hz  
AQ 1.3631488 sec  
RG 198.36  
DW 20.800 usec  
DE 6.50 usec  
TE 295.0 K  
D1 2.00000000 sec  
D11 0.03000000 sec  
TD0 1  
SFO1 100.6228298 MHz  
NUC1 13C  
P1 10.00 usec  
PLW1 75.84400177 W  
SFO2 400.1316005 MHz  
NUC2 1H  
CPDPRG[2] waltz16  
PCPD2 90.00 usec  
PLW2 16.43099976 W  
PLW12 0.20286000 W  
PLW13 0.10204000 W

F2 - Processing parameters  
SI 32768  
SF 100.6127593 MHz  
WDW EM  
SSB 0  
LB 1.00 Hz  
GB 0  
PC 1.40



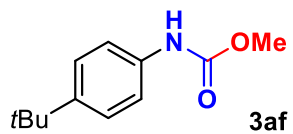

<sup>1</sup>H NMR (400 MHz, CDCl<sub>3</sub>)

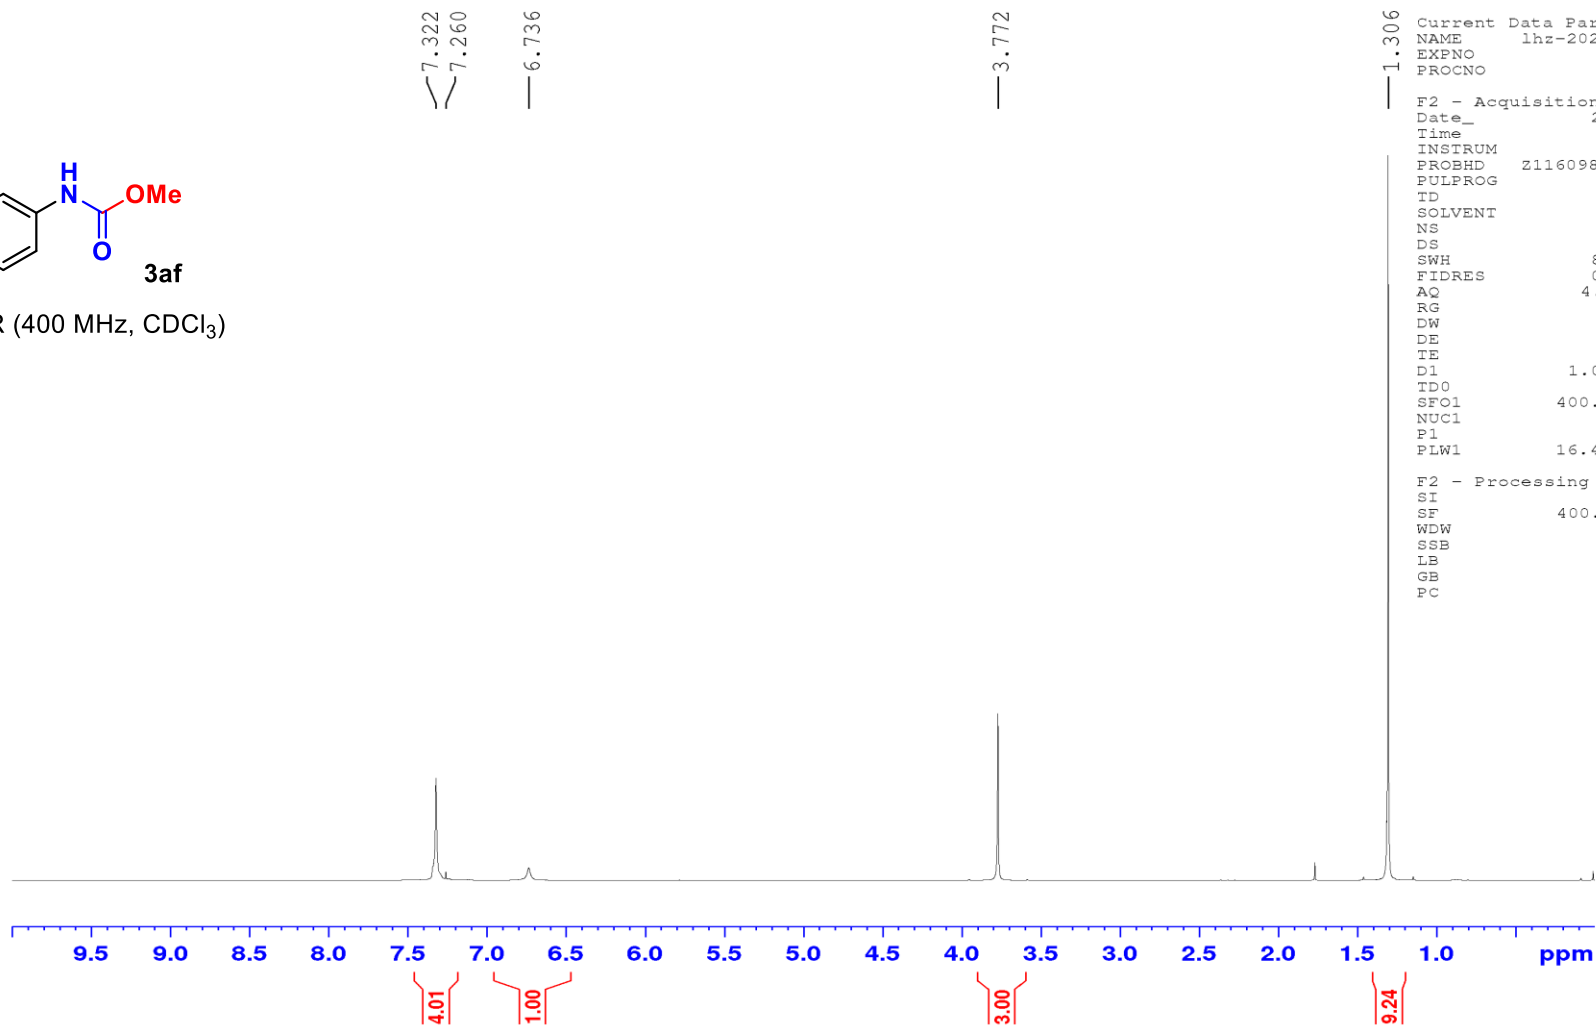

```
Current Data Parameters
NAME      lhz-20230413-2
EXPNO     1
PROCNO    1

F2 - Acquisition Parameters
Date_     20230413
Time      23.23 h
INSTRUM   spect
PROBHD    Z116098_0653 (
PULPROG   zg30
TD         65536
SOLVENT   CDCl3
NS         16
DS         2
SWH        8012.820 Hz
FIDRES     0.244532 Hz
AQ         4.089465 sec
RG         31.9
DW         62.400 usec
DE         6.50 usec
TE         292.3 K
D1         1.00000000 sec
TDO        1
SFO1      400.1324708 MHz
NUC1       1H
P1         10.00 usec
PLW1      16.43099976 W

F2 - Processing parameters
SI         65536
SF         400.1300098 MHz
WDW        EM
SSB        0
LB         0.30 Hz
GB         0
PC         1.00
```

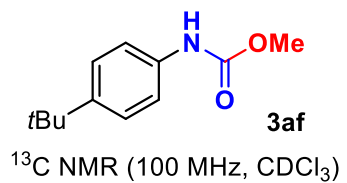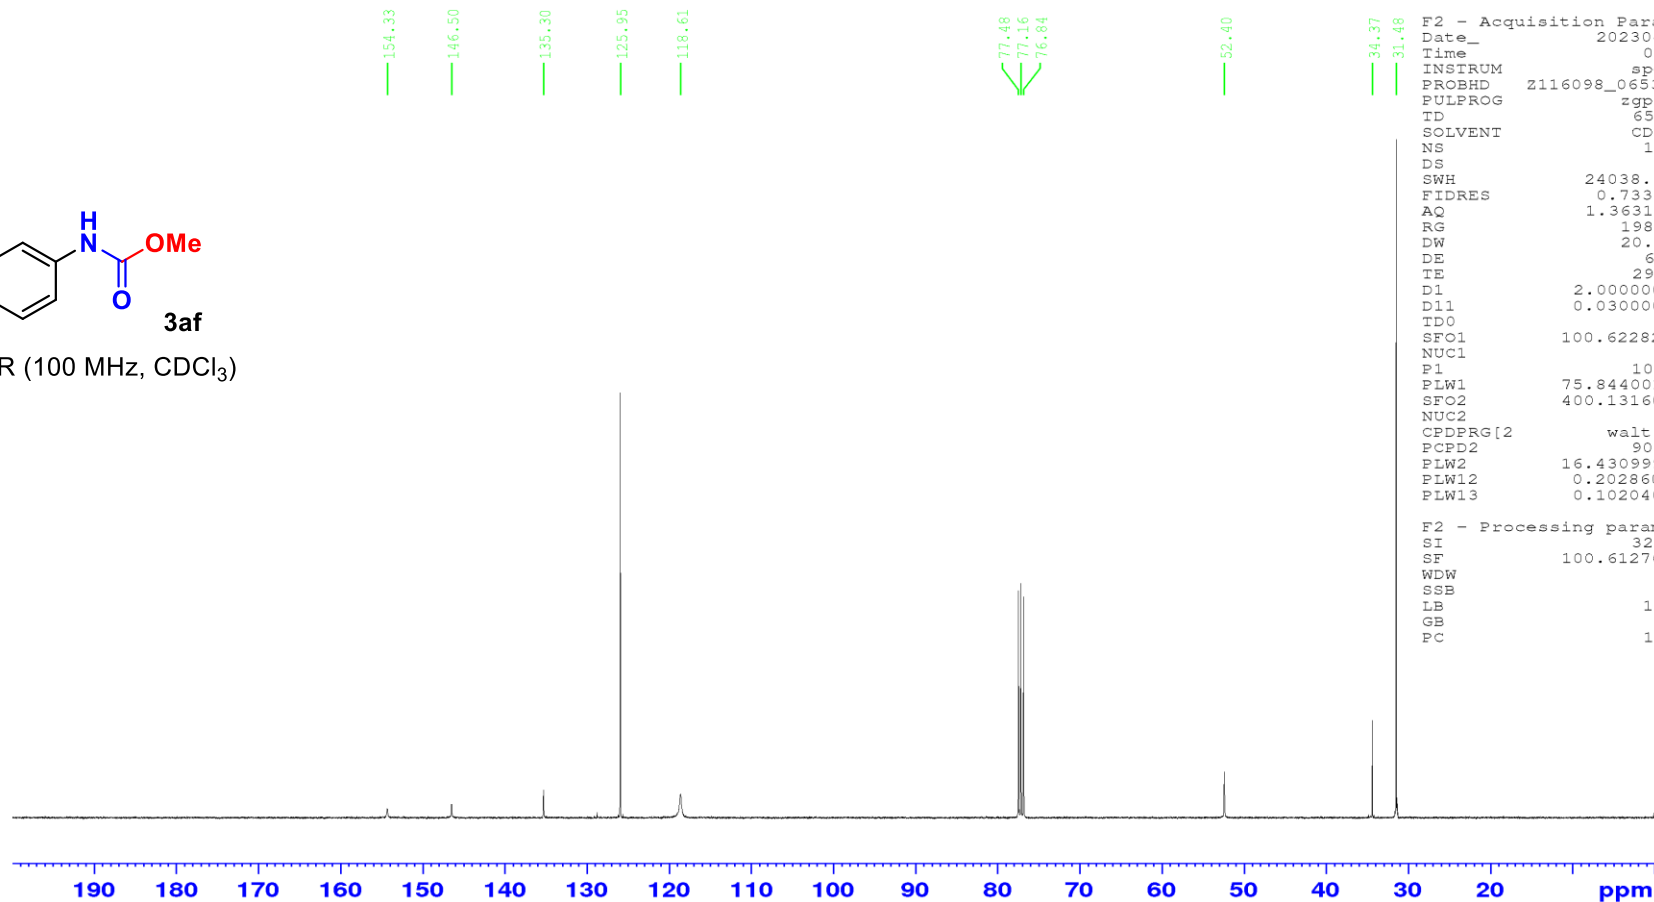

Current Data Parameters  
 NAME lhz-20230413-2  
 EXPNO 2  
 PROCNO 1

F2 - Acquisition Parameters  
 Date\_ 20230414  
 Time 0.23 h  
 INSTRUM spect  
 PROBHD Z116098\_0653 (  
 PULPROG zgpg30  
 TD 65536  
 SOLVENT CDCl3  
 NS 1024  
 DS 4  
 SWH 24038.461 Hz  
 FIDRES 0.733596 Hz  
 AQ 1.3631488 sec  
 RG 198.36  
 DW 20.800 usec  
 DE 6.50 usec  
 TE 292.5 K  
 D1 2.00000000 sec  
 D11 0.03000000 sec  
 TD0 1  
 SFO1 100.6228298 MHz  
 NUC1 13c  
 P1 10.00 usec  
 PLW1 75.84400177 W  
 SFO2 400.1316005 MHz  
 NUC2 1H  
 CPDPRG[2] waltz16  
 PCPD2 90.00 usec  
 PLW2 16.43099976 W  
 PLW12 0.20286000 W  
 PLW13 0.10204000 W

F2 - Processing parameters  
 SI 32768  
 SF 100.6127616 MHz  
 WDW EM  
 SSB 0  
 LB 1.00 Hz  
 GB 0  
 PC 1.40

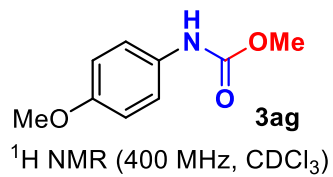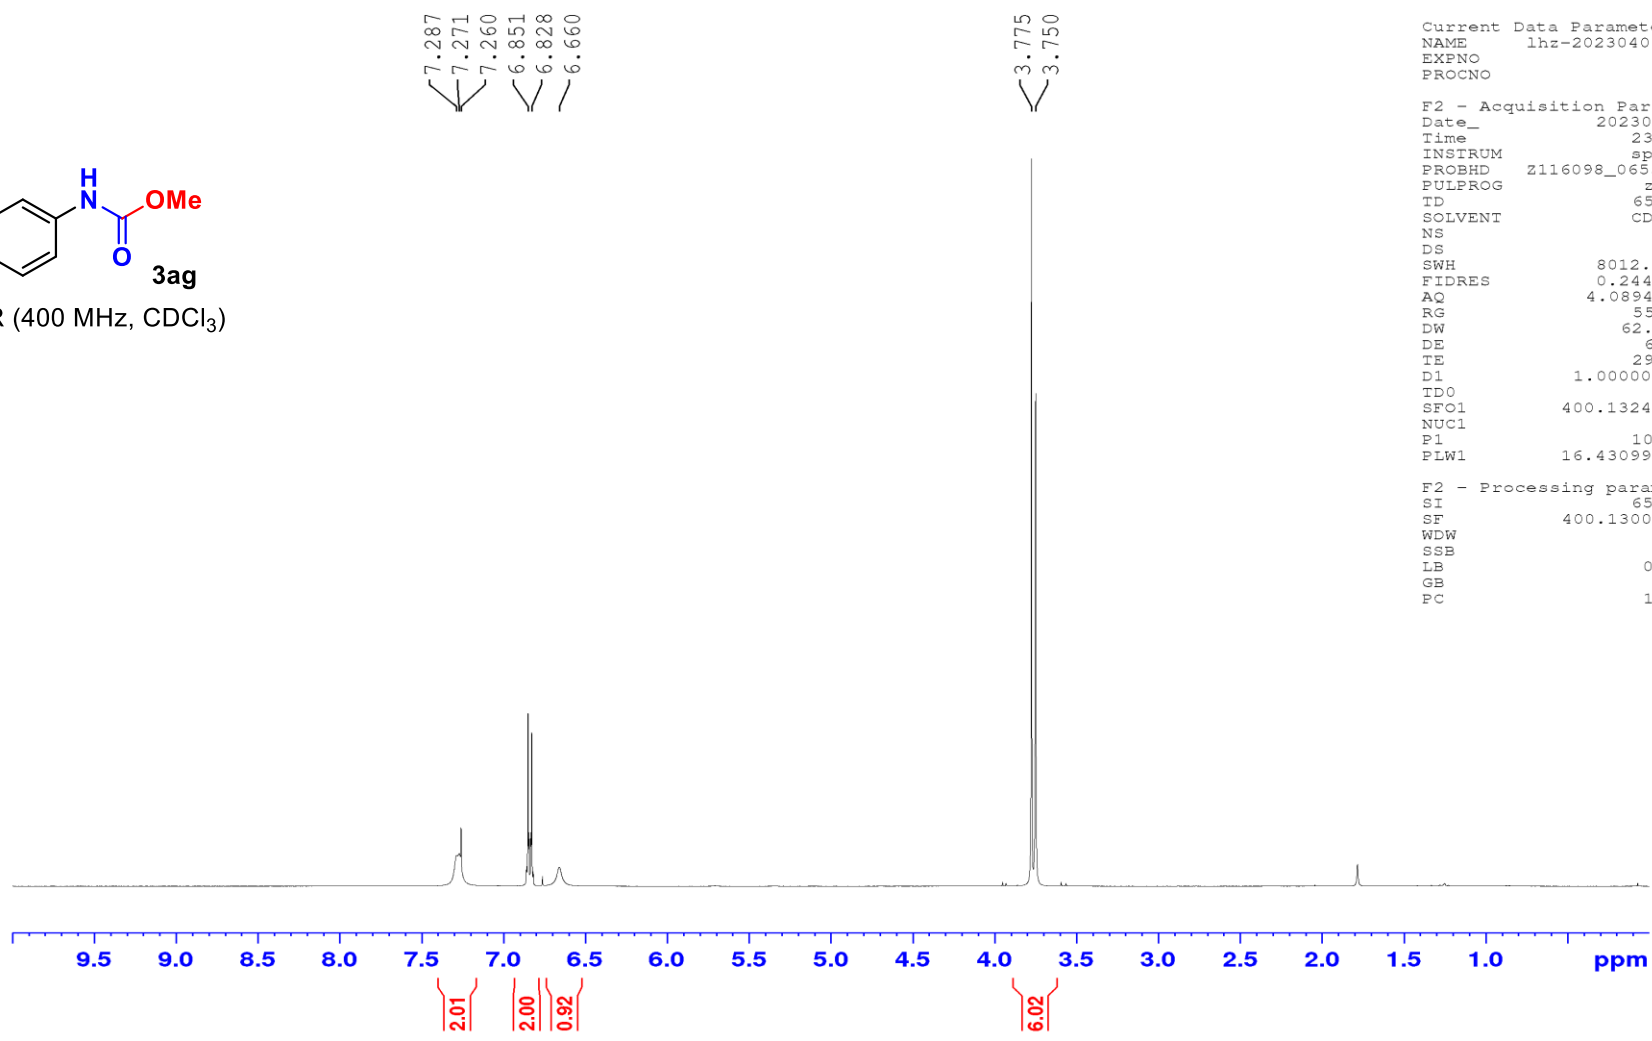

Current Data Parameters  
NAME lhz-20230407-2  
EXPNO 1  
PROCNO 1

F2 - Acquisition Parameters  
Date\_ 20230407  
Time 23.39 h  
INSTRUM spect  
PROBHD Z116098\_0653 (  
PULPROG zg30  
TD 65536  
SOLVENT CDCl3  
NS 16  
DS 2  
SWH 8012.820 Hz  
FIDRES 0.244532 Hz  
AQ 4.0894465 sec  
RG 55.99  
DW 62.400 usec  
DE 6.50 usec  
TE 292.2 K  
D1 1.00000000 sec  
TD0 1  
SFO1 400.1324708 MHz  
NUC1 1H  
P1 10.00 usec  
PLW1 16.43099976 W

F2 - Processing parameters  
SI 65536  
SF 400.1300098 MHz  
WDW EM  
SSB 0  
LB 0.30 Hz  
GB 0  
PC 1.00

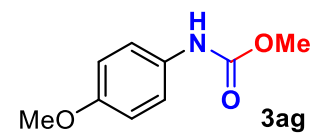

<sup>13</sup>C NMR (100 MHz, CDCl<sub>3</sub>)

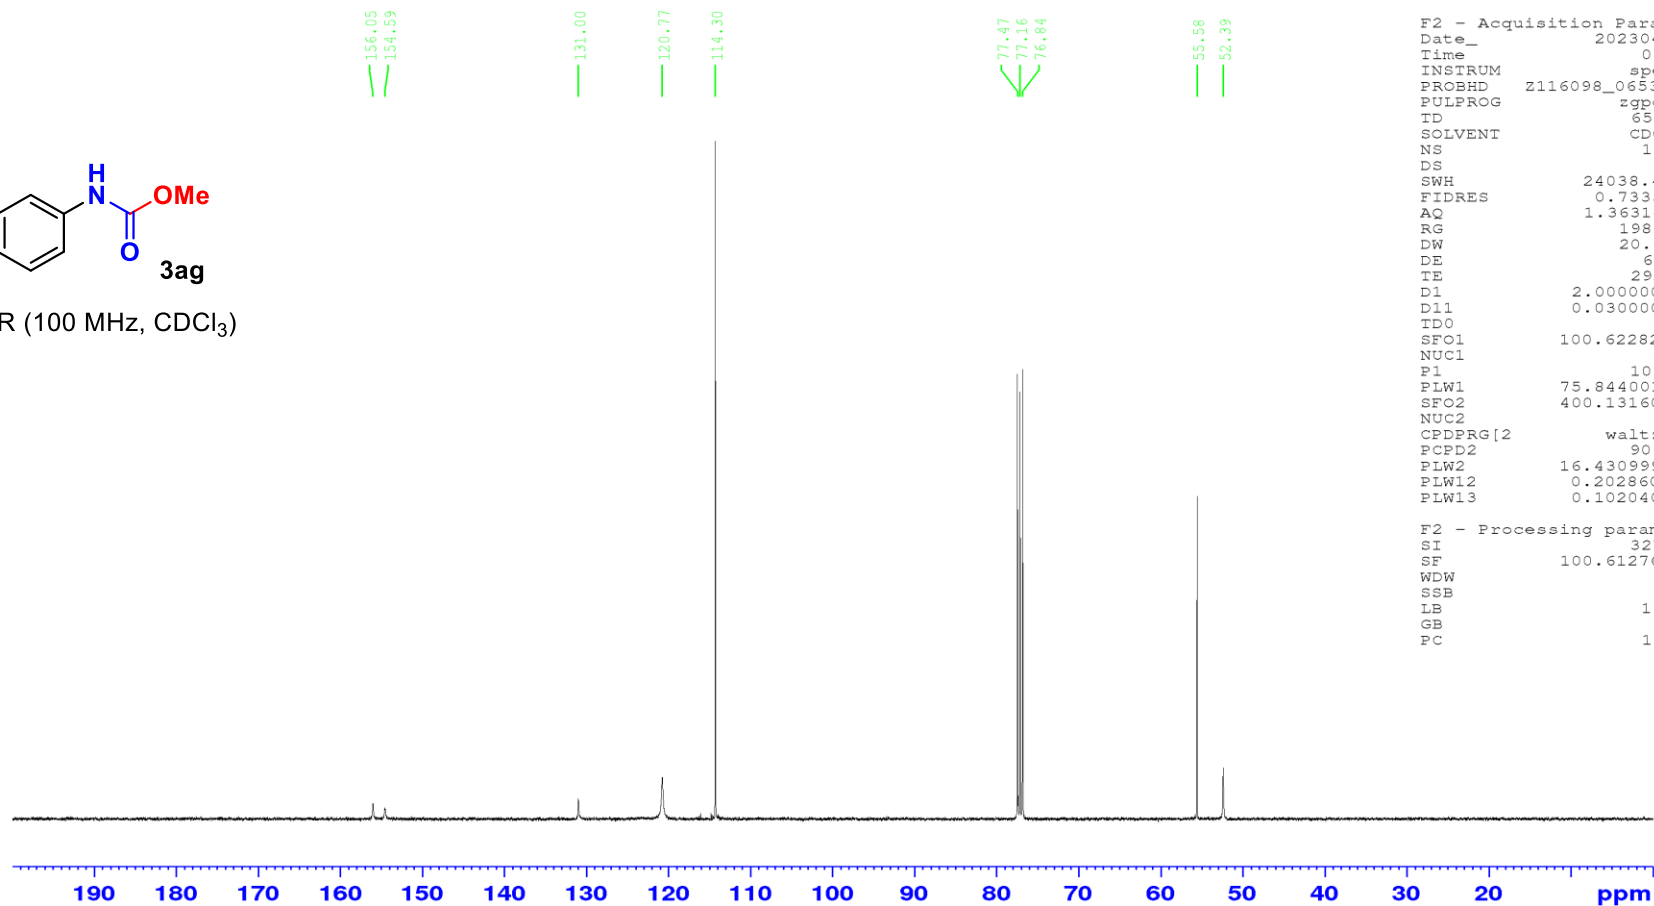

Current Data Parameters  
NAME lhz-20230407-2  
EXPNO 2  
PROCNO 1

F2 - Acquisition Parameters  
Date\_ 20230408  
Time 0.38 h  
INSTRUM spect  
PROBHD Z116098\_0653 (  
PULPROG zgpg30  
TD 65536  
SOLVENT CDCl3  
NS 1024  
DS 4  
SWH 24038.461 Hz  
FIDRES 0.733596 Hz  
AQ 1.3631488 sec  
RG 198.36  
DW 20.800 usec  
DE 6.50 usec  
TE 292.8 K  
D1 2.00000000 sec  
D11 0.03000000 sec  
TD0 1  
SFO1 100.6228298 MHz  
NUC1 13C  
P1 10.00 usec  
PLW1 75.84400177 W  
SFO2 400.1316005 MHz  
NUC2 1H  
CPDPRG[2] waltz16  
PCPD2 90.00 usec  
PLW2 16.43099976 W  
PLW12 0.20286000 W  
PLW13 0.10204000 W

F2 - Processing parameters  
SI 32768  
SF 100.6127613 MHz  
WDW EM  
SSB 0  
LB 1.00 Hz  
GB 0  
PC 1.40

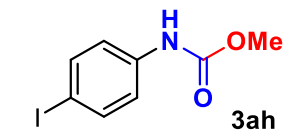

<sup>1</sup>H NMR (400 MHz, CDCl<sub>3</sub>)

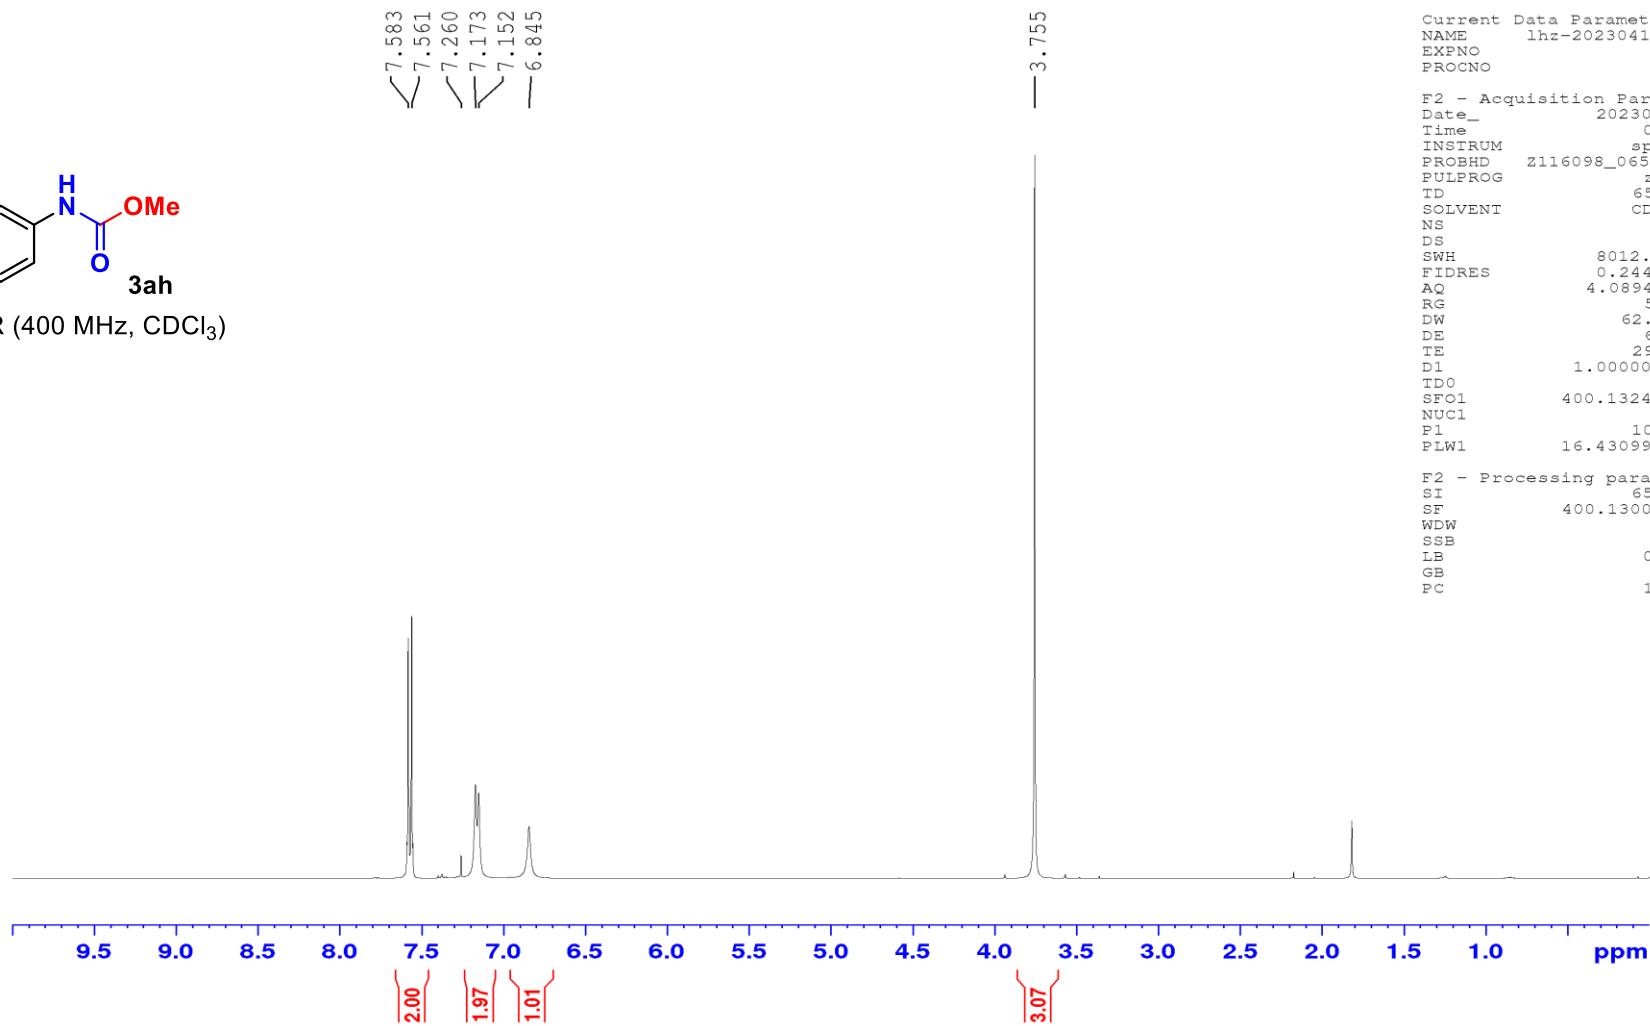

Current Data Parameters  
NAME lhz-20230419-3  
EXPNO 1  
PROCNO 1

F2 - Acquisition Parameters  
Date\_ 20230420  
Time 0.39 h  
INSTRUM spect  
PROBHD Z116098\_0653 (  
PULPROG zg30  
TD 65536  
SOLVENT CDCl3  
NS 16  
DS 2  
SWH 8012.820 Hz  
FIDRES 0.244532 Hz  
AQ 4.0894465 sec  
RG 50.3  
DW 62.400 usec  
DE 6.50 usec  
TE 291.8 K  
D1 1.00000000 sec  
ID0 1  
SFO1 400.1324708 MHz  
NUC1 1H  
P1 10.00 usec  
PLW1 16.43099976 W

F2 - Processing parameters  
SI 65536  
SF 400.1300098 MHz  
WDW EM  
SSB 0  
LB 0.30 Hz  
GB 0  
PC 1.00

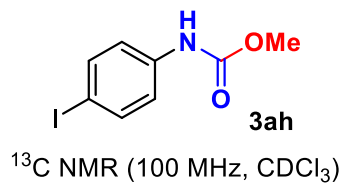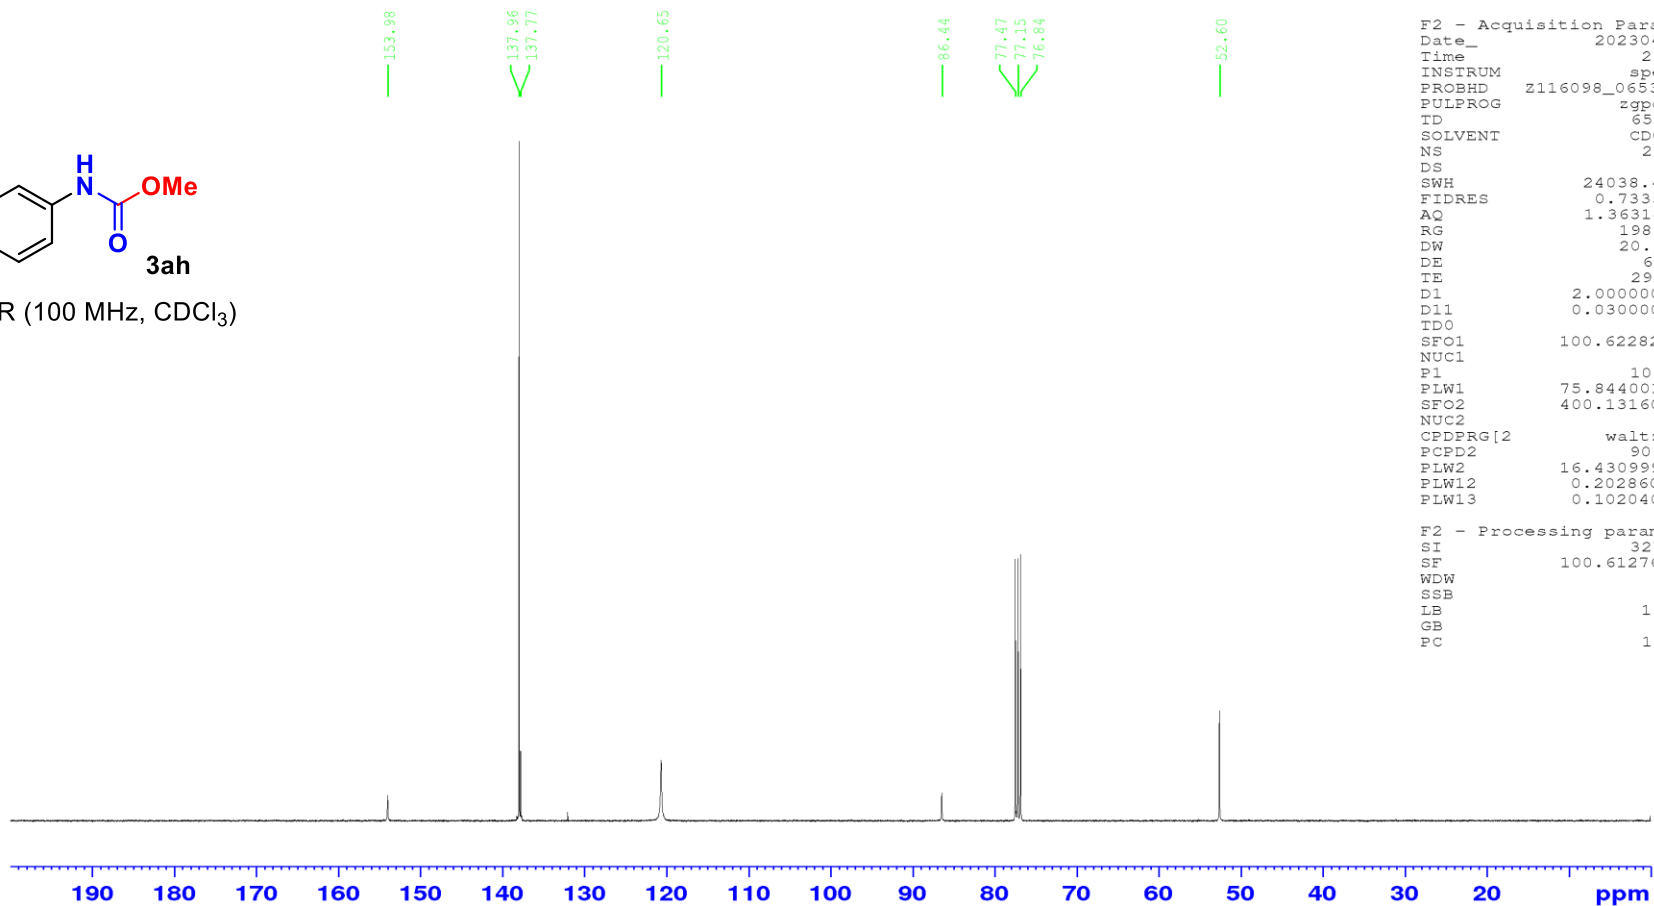

Current Data Parameters  
 NAME lhz-20230419-3  
 EXPNO 2  
 PROCNO 1

F2 - Acquisition Parameters  
 Date\_ 20230420  
 Time 2.34 h  
 INSTRUM spect  
 PROBHD z116098\_0653 ( )  
 PULPROG zgpg30  
 TD 65536  
 SOLVENT CDCl3  
 NS 2000  
 DS 4  
 SWH 24038.461 Hz  
 FIDRES 0.7333596 Hz  
 AQ 1.3631488 sec  
 RG 198.36  
 DW 20.800 usec  
 DE 6.50 usec  
 TE 292.7 K  
 D1 2.00000000 sec  
 D11 0.03000000 sec  
 TD0 1  
 SFO1 100.6228298 MHz  
 NUC1 13C  
 P1 10.00 usec  
 PLW1 75.84400177 W  
 SFO2 400.1316005 MHz  
 NUC2 1H  
 CPDPRG[2] waltz16  
 PCPD2 90.00 usec  
 PLW2 16.43099976 W  
 PLW12 0.20286000 W  
 PLW13 0.10204000 W

F2 - Processing parameters  
 SI 32768  
 SF 100.6127638 MHz  
 WDW EM  
 SSB 0  
 LB 1.00 Hz  
 GB 0  
 FC 1.40

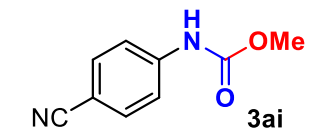

<sup>1</sup>H NMR (400 MHz, CDCl<sub>3</sub>)

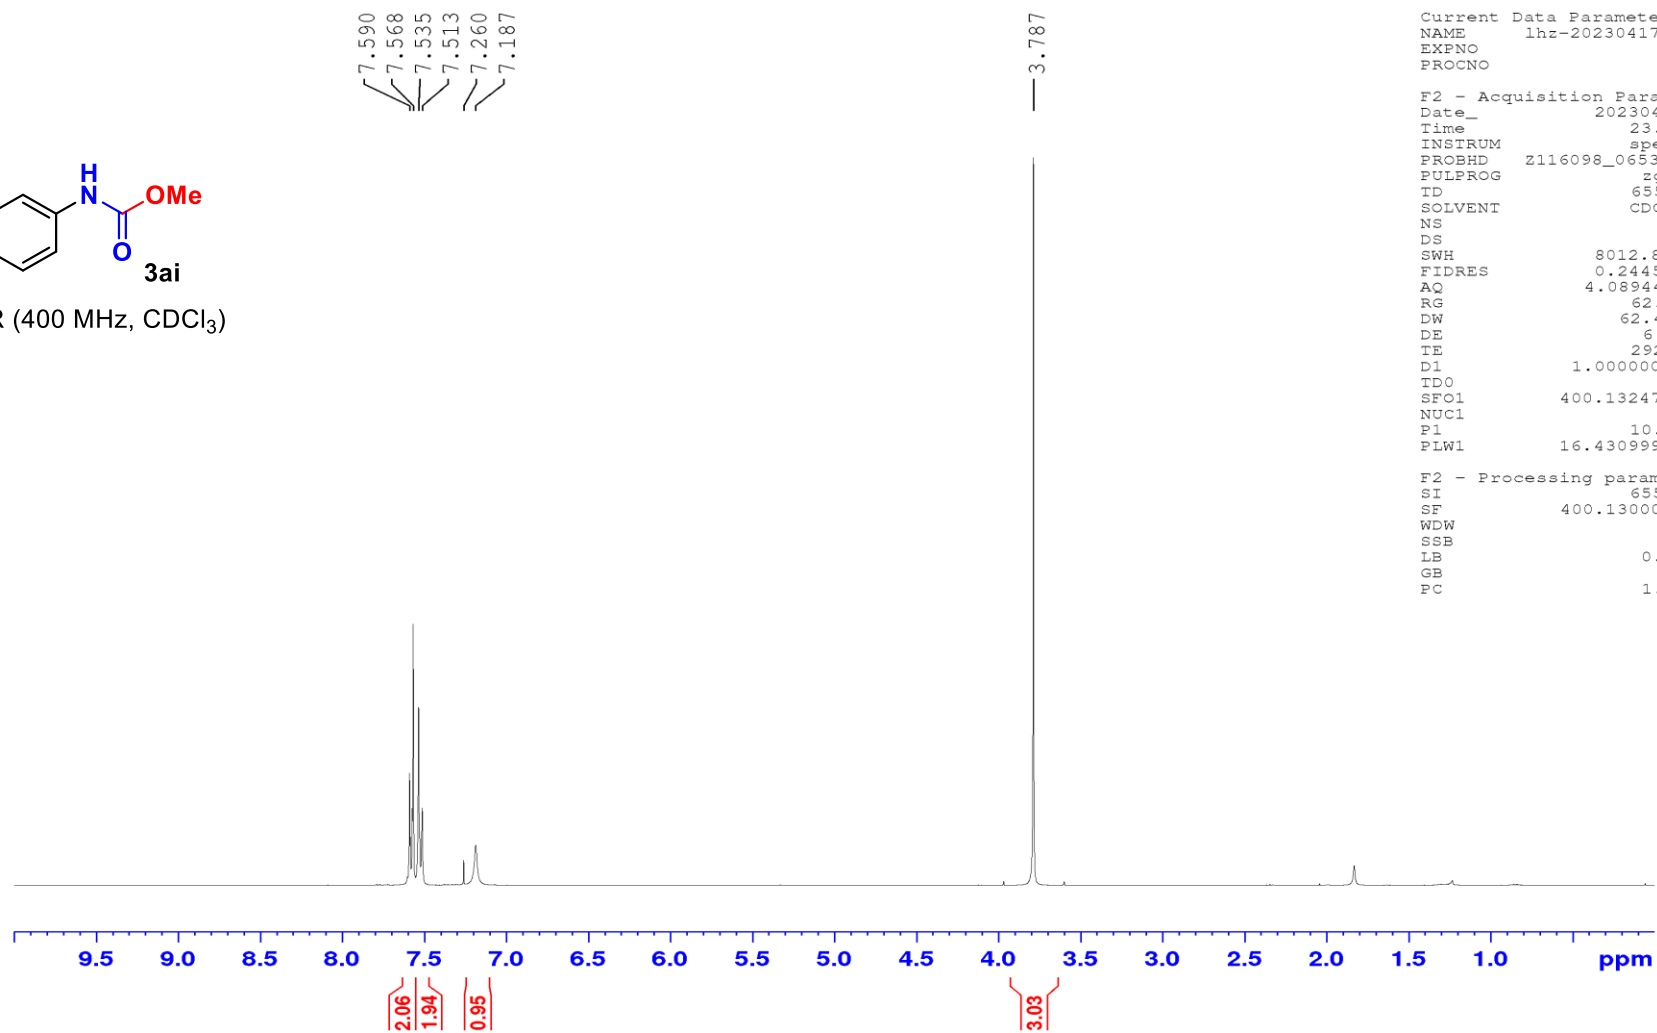

Current Data Parameters  
NAME lhz-20230417-2  
EXPNO 1  
PROCNO 1

F2 - Acquisition Parameters  
Date\_ 20230417  
Time 23.27 h  
INSTRUM spect  
PROBHD Z116098\_0653 (  
PULPROG zg30  
TD 65536  
SOLVENT CDCl3  
NS 16  
DS 2  
SWH 8012.820 Hz  
FIDRES 0.244532 Hz  
AQ 4.0894465 sec  
RG 62.98  
DW 62.400 usec  
DE 6.50 usec  
TE 292.1 K  
D1 1.00000000 sec  
TD0 1  
SFO1 400.1324708 MHz  
NUC1 1H  
P1 10.00 usec  
PLW1 16.43099976 W

F2 - Processing parameters  
SI 65536  
SF 400.1300098 MHz  
WDW EM  
SSB 0  
LB 0.30 Hz  
GB 0  
FC 1.00

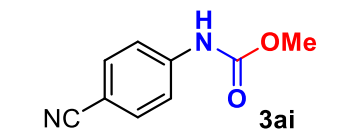

<sup>13</sup>C NMR (100 MHz, CDCl<sub>3</sub>)

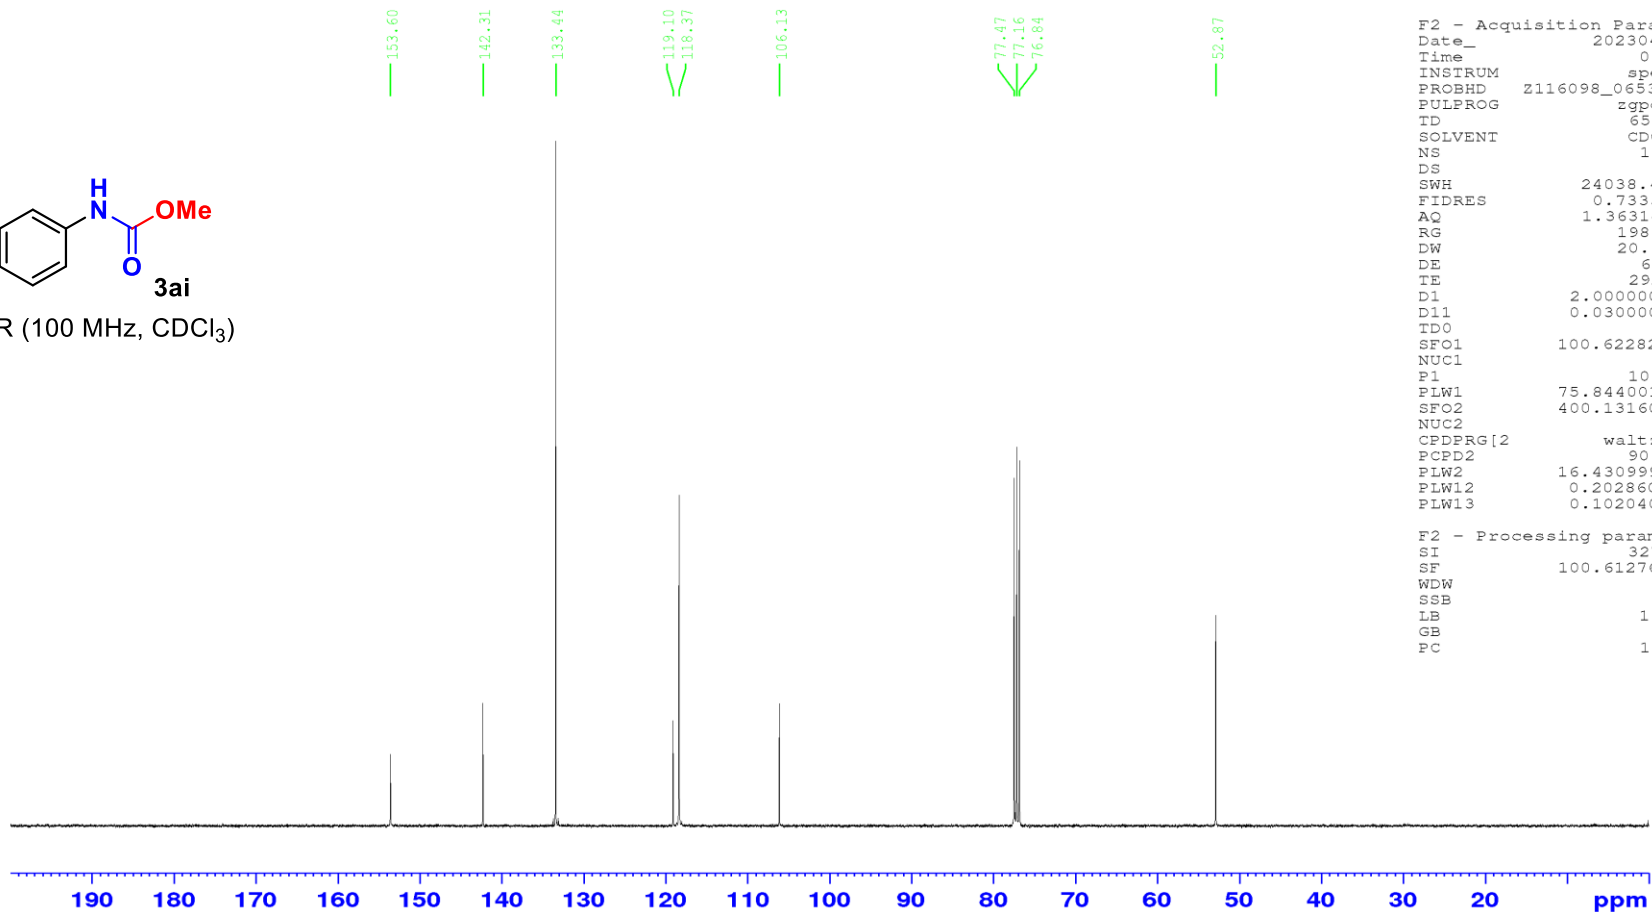

Current Data Parameters  
 NAME lhz-20230417-2  
 EXPNO 2  
 PROCNO 1

F2 - Acquisition Parameters  
 Date\_ 20230418  
 Time 0.27 h  
 INSTRUM spect  
 PROBHD Z116098\_0653 (  
 PULPROG zgpg30  
 TD 65536  
 SOLVENT CDCl3  
 NS 1024  
 DS 4  
 SWH 24038.461 Hz  
 FIDRES 0.733596 Hz  
 AQ 1.3631488 sec  
 RG 198.36  
 DW 20.800 usec  
 DE 6.50 usec  
 TE 292.5 K  
 D1 2.00000000 sec  
 D11 0.03000000 sec  
 TD0 1  
 SFO1 100.6228298 MHz  
 NUC1 13C  
 P1 10.00 usec  
 PLW1 75.84400177 W  
 SFO2 400.1316005 MHz  
 NUC2 1H  
 CPDPRG[2] waltz16  
 PCPD2 90.00 usec  
 PLW2 16.43099976 W  
 PLW12 0.20286000 W  
 PLW13 0.10204000 W

F2 - Processing parameters  
 SI 32768  
 SF 100.6127623 MHz  
 WDW EM  
 SSB 0  
 LB 1.00 Hz  
 GB 0  
 PC 1.40



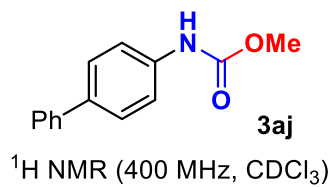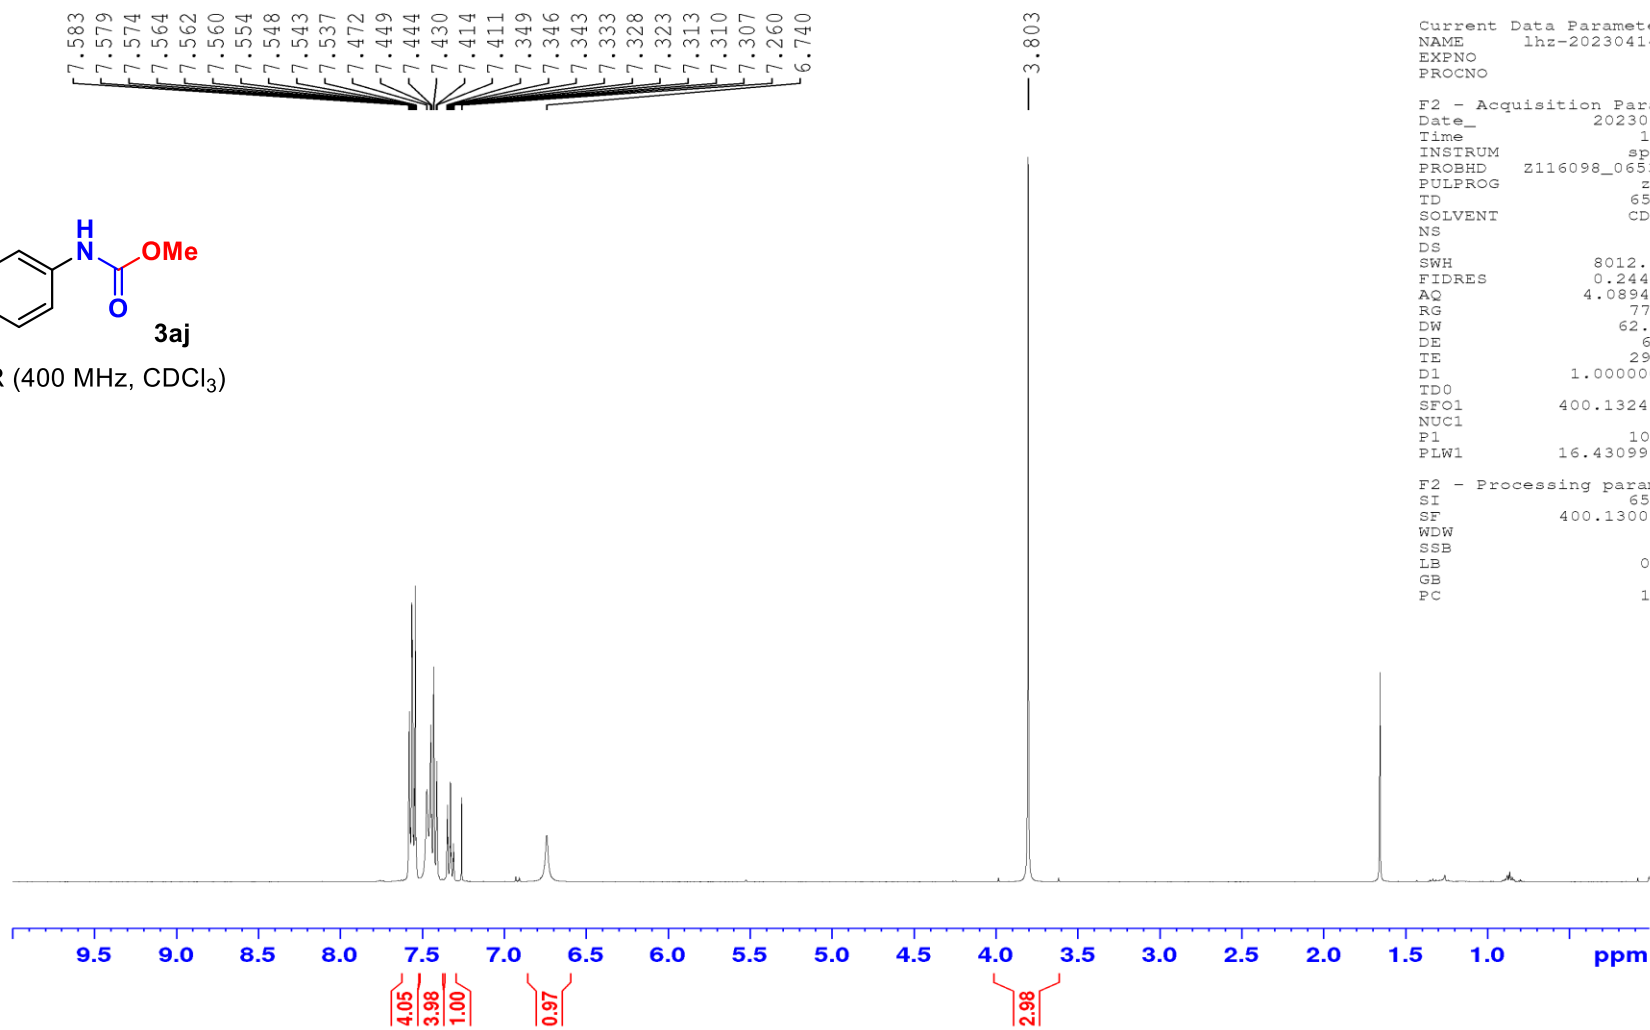

```

Current Data Parameters
NAME      lhz-20230414-4
EXPNO     1
PROCNO    1

F2 - Acquisition Parameters
Date_     20230415
Time      1.37 h
INSTRUM   spect
PROBHD    zg30
PULPROG   zg30
TD         65536
SOLVENT   CDCl3
NS         16
DS         2
SWH        8012.820 Hz
FIDRES     0.244532 Hz
AQ         4.0894465 sec
RG         77.68
DW         62.400 usec
DE         6.50 usec
TE         292.1 K
D1         1.00000000 sec
TD0        1
SFO1      400.1324708 MHz
NUC1       1H
P1         10.00 usec
PLW1      16.43099976 W

F2 - Processing parameters
SI         65536
SF         400.1300098 MHz
WDW        EM
SSB        0
LB         0.30 Hz
GB         0
PC         1.00
  
```

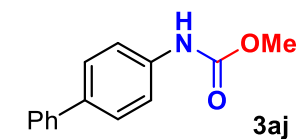

<sup>13</sup>C NMR (100 MHz, CDCl<sub>3</sub>)

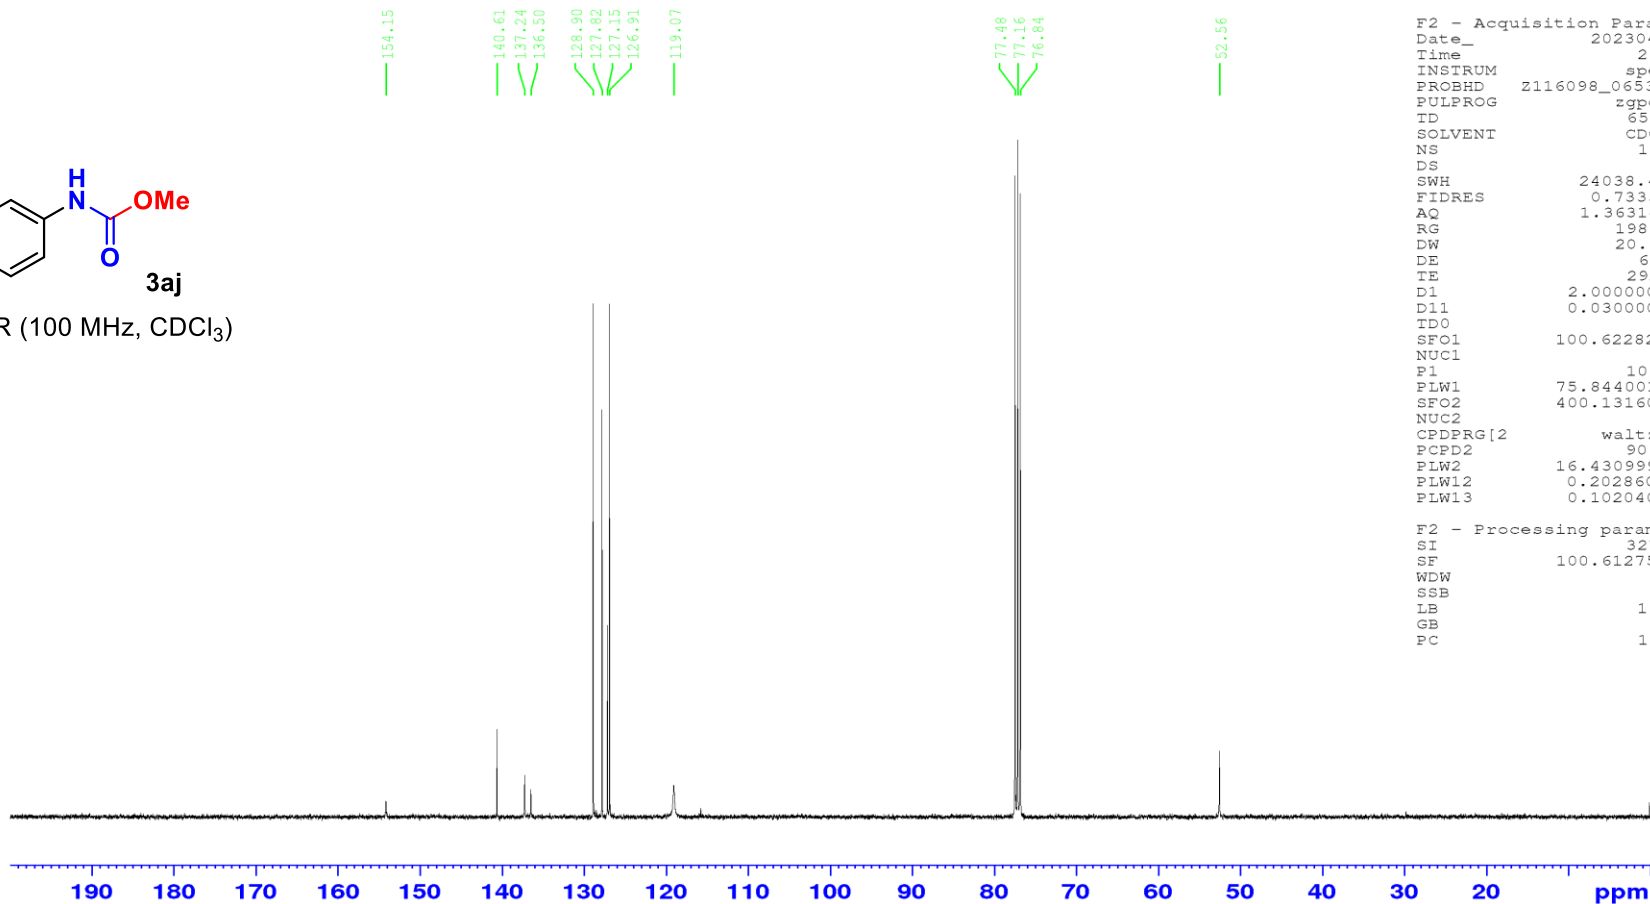

Current Data Parameters  
 NAME lhz-20230414-4  
 EXPNO 2  
 PROCNO 1

F2 - Acquisition Parameters  
 Date\_ 20230415  
 Time 2.37 h  
 INSTRUM spect  
 PROBHD Z116098\_0653 (  
 PULPROG zgpg30  
 TD 65536  
 SOLVENT CDCl3  
 NS 1024  
 DS 4  
 SWH 24038.461 Hz  
 FIDRES 0.733596 Hz  
 AQ 1.3631488 sec  
 RG 198.36  
 DW 20.800 usec  
 DE 6.50 usec  
 TE 292.4 K  
 D1 2.00000000 sec  
 D11 0.03000000 sec  
 TD0 1  
 SFO1 100.6228298 MHz  
 NUC1 13C  
 P1 10.00 usec  
 PLW1 75.84400177 W  
 SFO2 400.1316005 MHz  
 NUC2 1H  
 CPDPRG[2] waltz16  
 PCPD2 90.00 usec  
 PLW2 16.43099976 W  
 PLW12 0.20286000 W  
 PLW13 0.10204000 W

F2 - Processing parameters  
 SI 32768  
 SF 100.6127594 MHz  
 WDW EM  
 SSB 0  
 LB 1.00 Hz  
 GB 0  
 FC 1.40

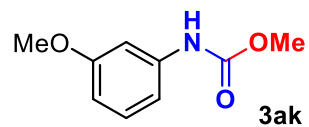

<sup>1</sup>H NMR (400 MHz, CDCl<sub>3</sub>)

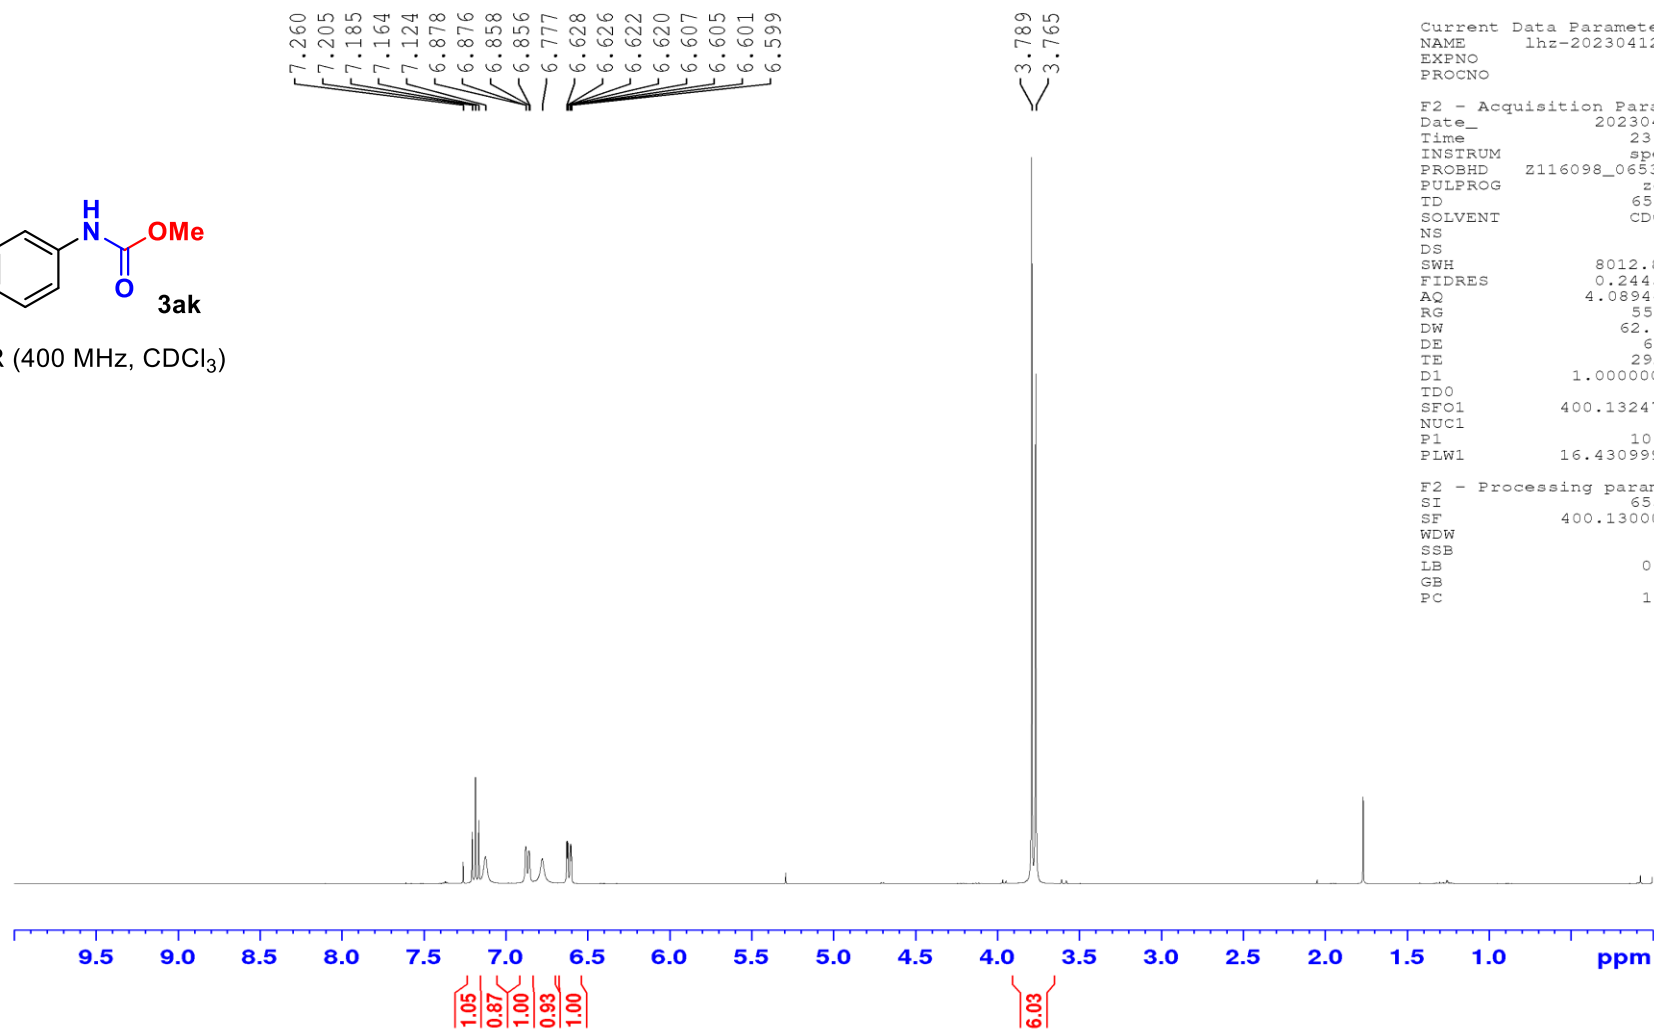

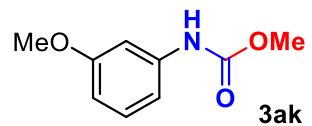

<sup>13</sup>C NMR (100 MHz, CDCl<sub>3</sub>)

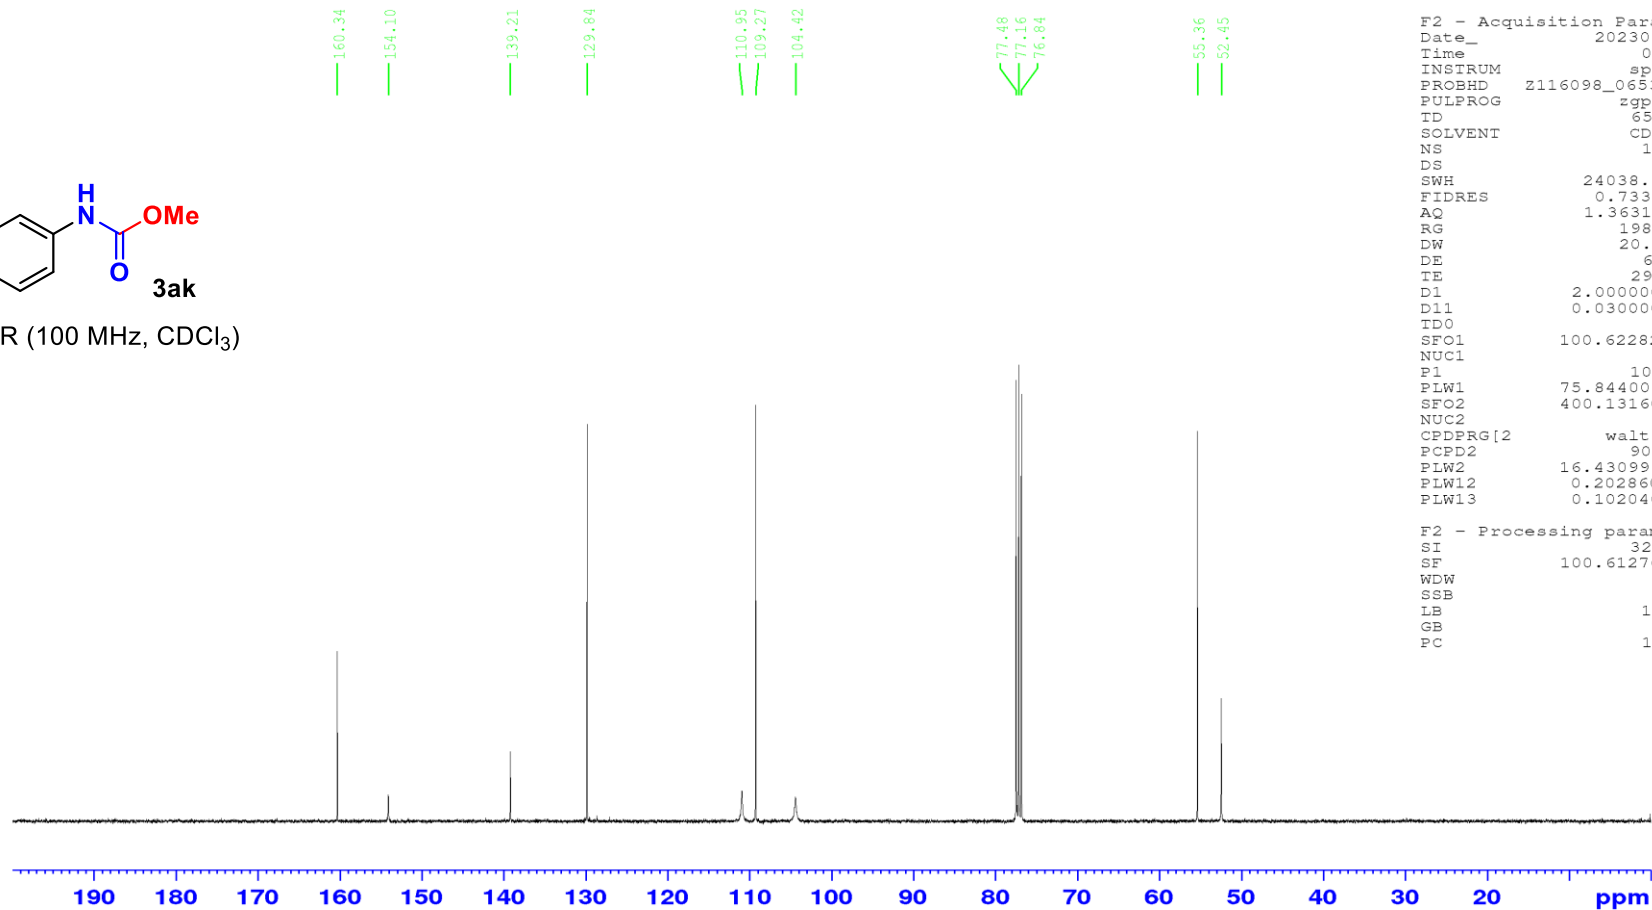

Current Data Parameters  
NAME lhz-20230412-2  
EXPNO 2  
PROCNO 1

F2 - Acquisition Parameters  
Date\_ 20230413  
Time 0.34 h  
INSTRUM spect  
PROBHD Z116098\_0653 (  
PULPROG zgpg30  
TD 65536  
SOLVENT CDCl3  
NS 1024  
DS 4  
SWH 24038.461 Hz  
FIDRES 0.733596 Hz  
AQ 1.3631488 sec  
RG 198.36  
DW 20.800 usec  
DE 6.50 usec  
TE 292.6 K  
D1 2.00000000 sec  
D11 0.03000000 sec  
TD0 1  
SFO1 100.6228298 MHz  
NUC1 13c  
P1 10.00 usec  
PLW1 75.84400177 W  
SFO2 400.1316005 MHz  
NUC2 1H  
CPDPRG[2] waltz16  
PCPD2 90.00 usec  
PLW2 16.43099976 W  
PLW12 0.20286000 W  
PLW13 0.10204000 W

F2 - Processing parameters  
SI 32768  
SF 100.6127608 MHz  
WDW EM  
SSB 0  
LB 1.00 Hz  
GB 0  
PC 1.40

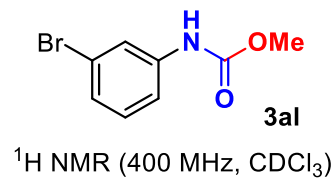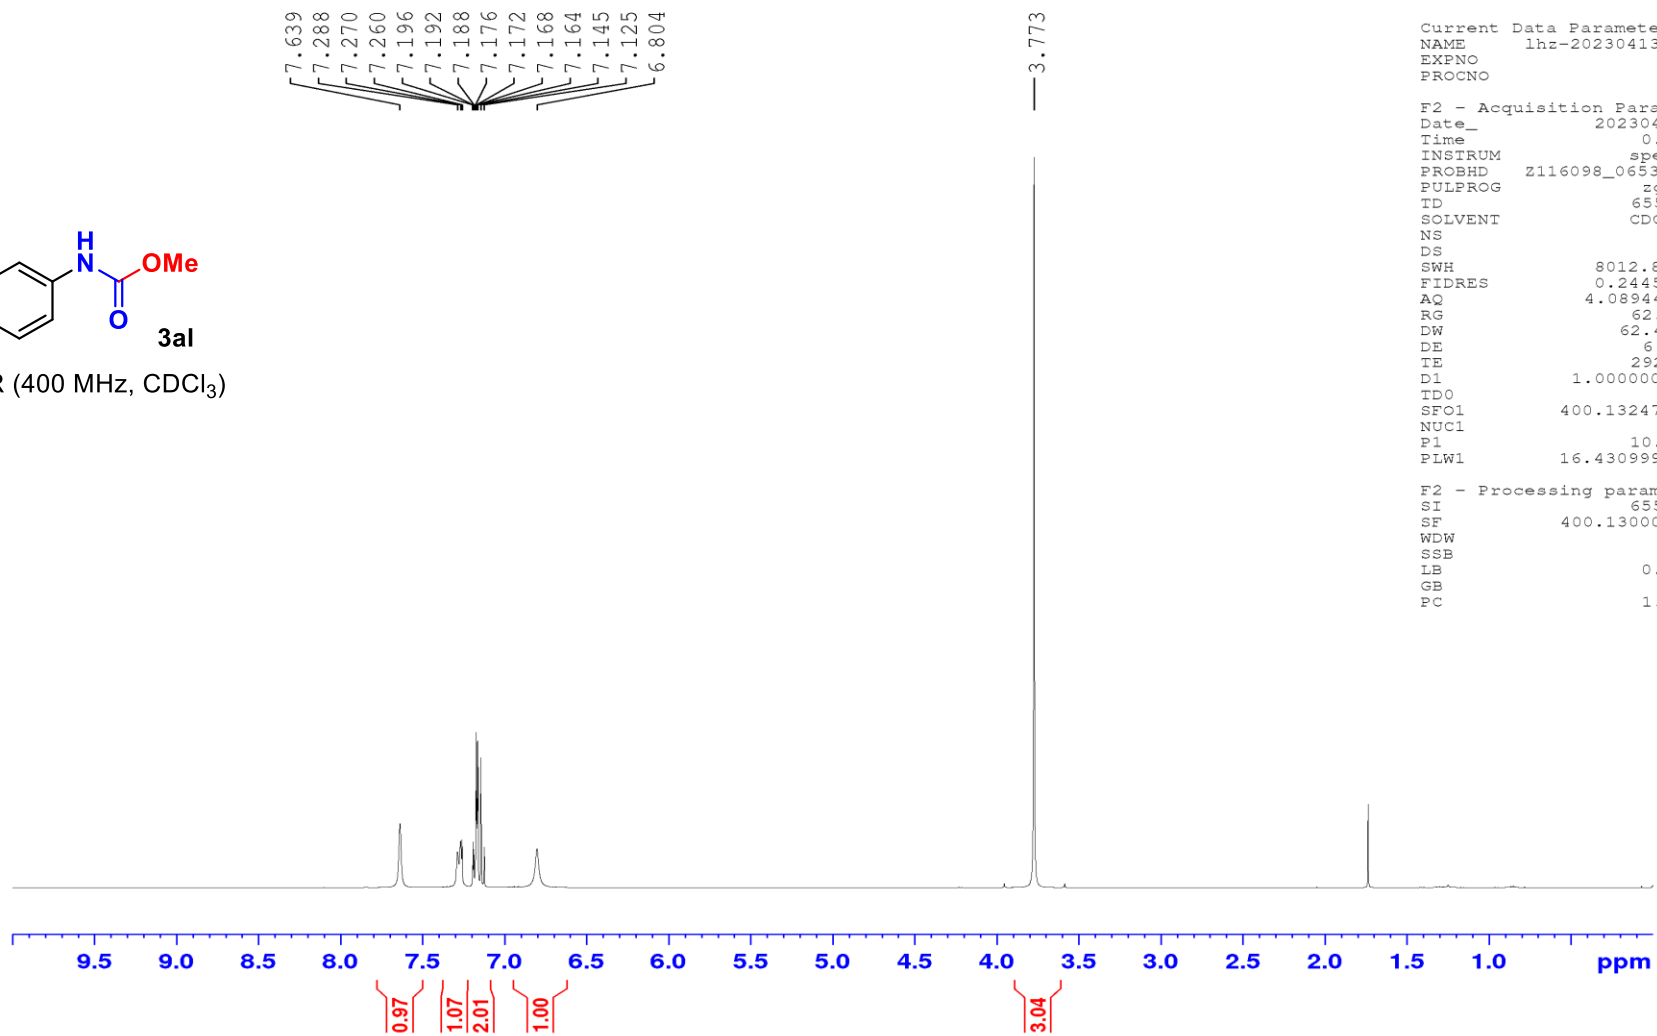

Current Data Parameters  
NAME lhz-20230413-3  
EXPNO 1  
PROCNO 1

F2 - Acquisition Parameters  
Date\_ 20230414  
Time 0.27 h  
INSTRUM spect  
PROBHD Z116098\_0653 (  
PULPROG zg30  
TD 65536  
SOLVENT CDCl3  
NS 16  
DS 2  
SWH 8012.820 Hz  
FIDRES 0.244532 Hz  
AQ 4.0894465 sec  
RG 62.98  
DW 62.400 usec  
DE 6.50 usec  
TE 292.1 K  
D1 1.00000000 sec  
TD0 1  
SFO1 400.1324708 MHz  
NUC1 1H  
P1 10.00 usec  
PLW1 16.43099976 W

F2 - Processing parameters  
SI 65536  
SF 400.1300098 MHz  
WDW EM  
SSB 0  
LB 0.30 Hz  
GB 0  
PC 1.00

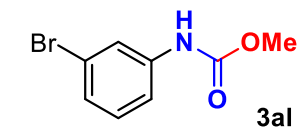

<sup>13</sup>C NMR (100 MHz, CDCl<sub>3</sub>)

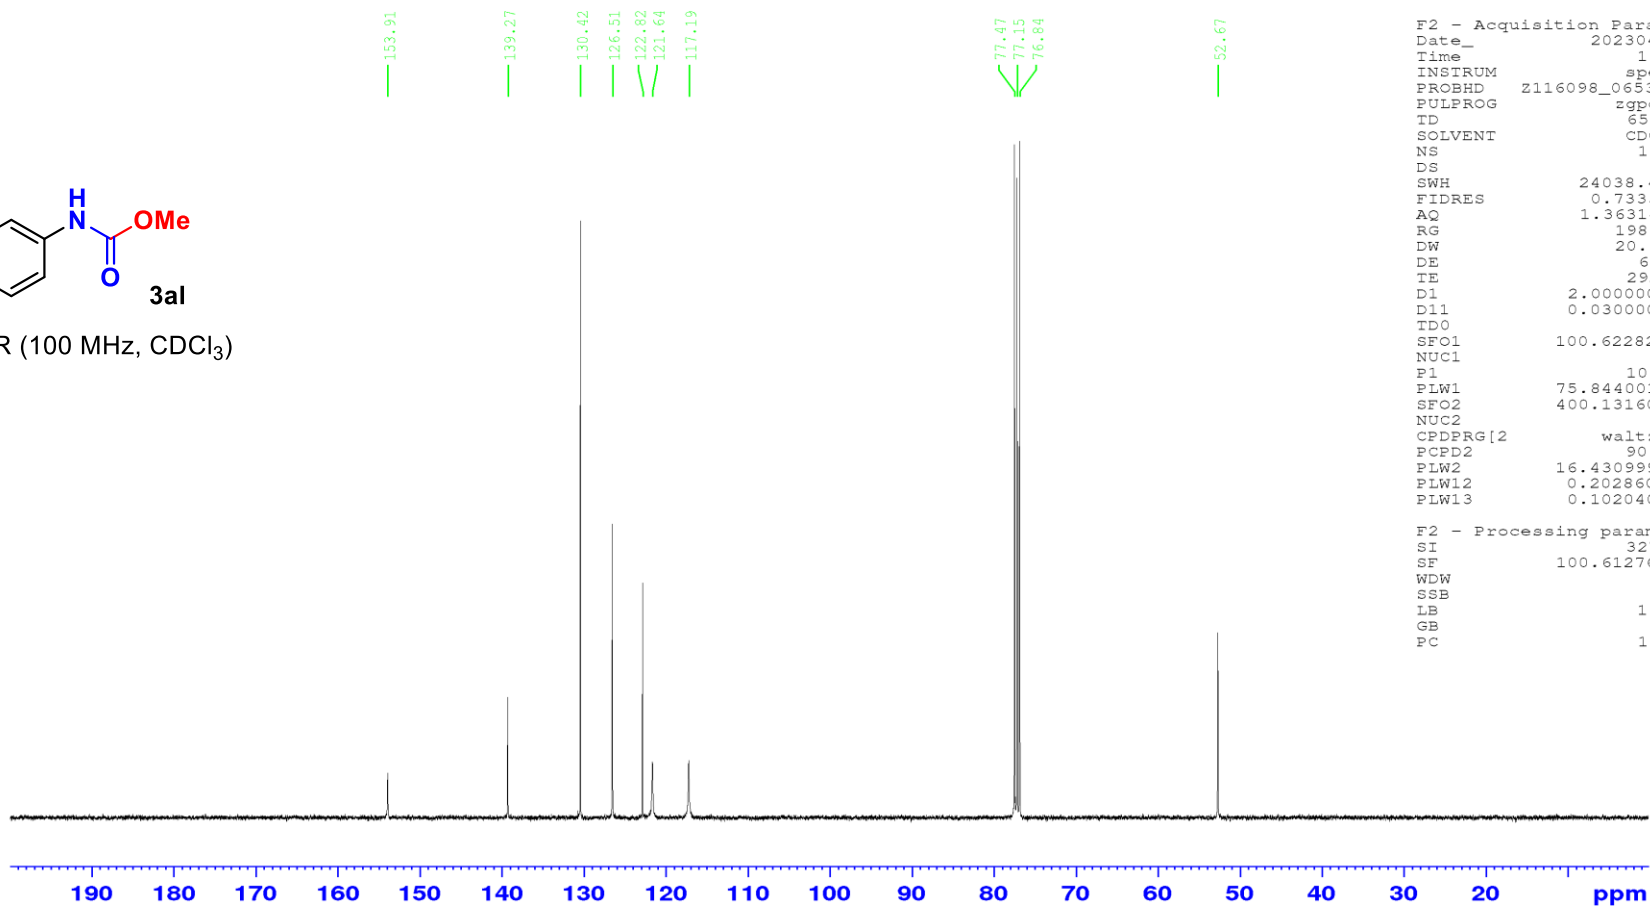

Current Data Parameters  
 NAME lhz-20230413-3  
 EXPNO 2  
 PROCNO 1

F2 - Acquisition Parameters  
 Date\_ 20230414  
 Time 1.27 h  
 INSTRUM spect  
 PROBHD Z116098\_0653 (  
 PULPROG zgpg30  
 TD 65536  
 SOLVENT CDCl3  
 NS 1024  
 DS 4  
 SWH 24038.461 Hz  
 FIDRES 0.733596 Hz  
 AQ 1.3631488 sec  
 RG 198.36  
 DW 20.800 usec  
 DE 6.50 usec  
 TE 292.9 K  
 D1 2.00000000 sec  
 D11 0.03000000 sec  
 TD0 1  
 SFO1 100.6228298 MHz  
 NUC1 13c  
 P1 10.00 usec  
 PLW1 75.84400177 W  
 SFO2 400.1316005 MHz  
 NUC2 1H  
 CPDPRG[2] waltz16  
 FCPD2 90.00 usec  
 PLW2 16.43099976 W  
 PLW12 0.20286000 W  
 PLW13 0.10204000 W

F2 - Processing parameters  
 SI 32768  
 SF 100.6127606 MHz  
 WDW EM  
 SSB 0  
 LB 1.00 Hz  
 GB 0  
 PC 1.40

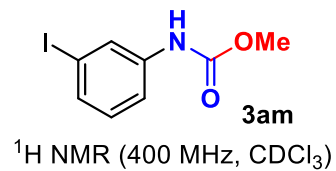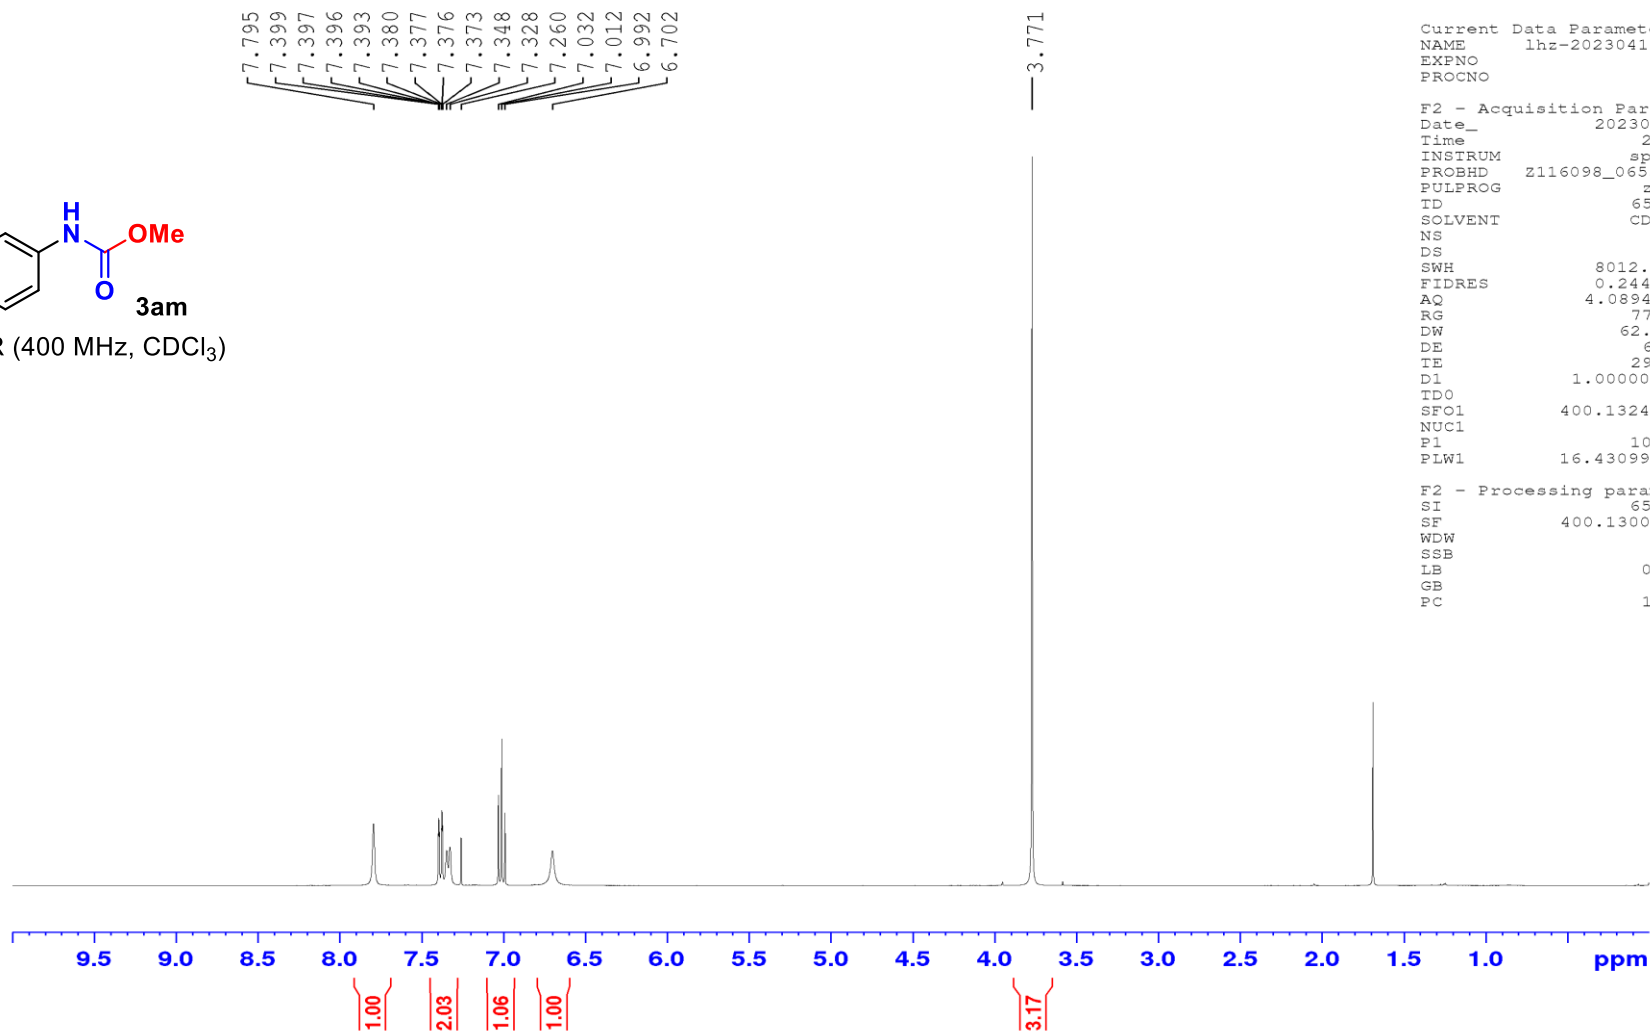

```

Current Data Parameters
NAME      lhz-20230414-5
EXPNO     1
PROCNO    1

F2 - Acquisition Parameters
Date_     20230415
Time      2.41 h
INSTRUM   spect
PROBHD    Z116098_0653 (
PULPROG   zg30
TD         65536
SOLVENT   CDCl3
NS         16
DS         2
SWH        8012.820 Hz
FIDRES     0.244532 Hz
AQ          4.0894465 sec
RG          77.68
DW          62.400 usec
DE          6.50 usec
TE          292.1 K
D1          1.00000000 sec
TD0         1
SFO1       400.1324708 MHz
NUC1        1H
P1          10.00 usec
PLW1       16.43099976 W

F2 - Processing parameters
SI         65536
SF         400.1300099 MHz
WDW        EM
SSB         0
LB          0.30 Hz
GB          0
PC          1.00
  
```

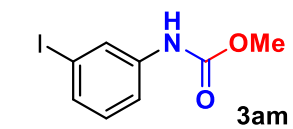

<sup>13</sup>C NMR (100 MHz, CDCl<sub>3</sub>)

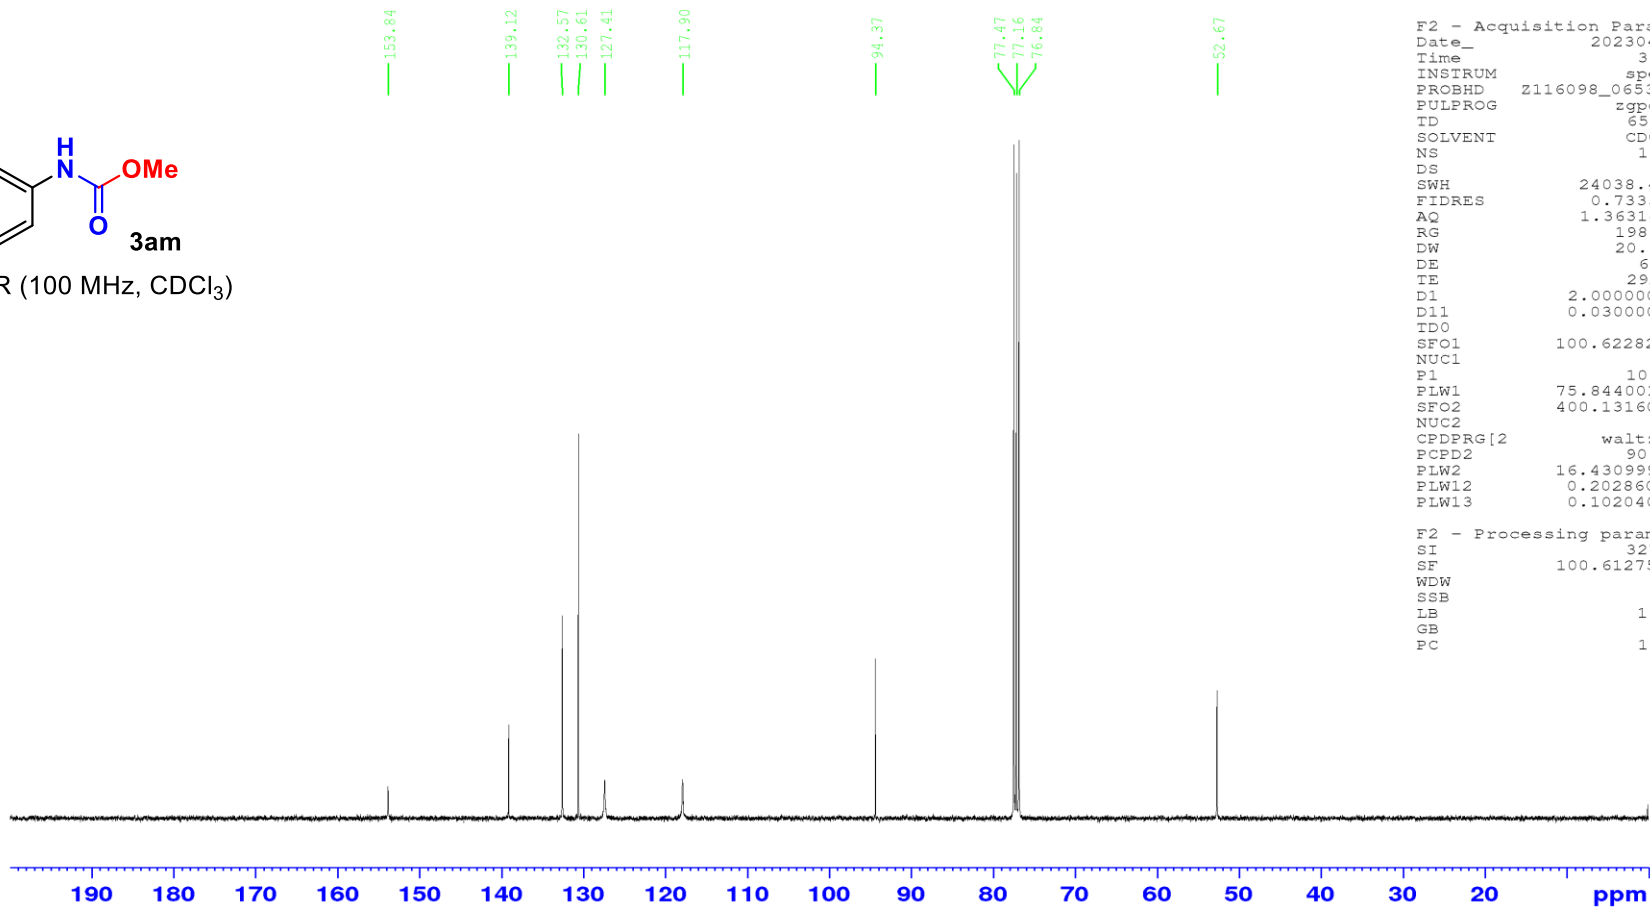

Current Data Parameters  
NAME lhz-20230414-5  
EXPNO 2  
PROCNO 1

F2 - Acquisition Parameters  
Date\_ 20230415  
Time 3.41 h  
INSTRUM spect  
PROBHD Z116098\_0653 (  
PULPROG zgpg30  
TD 65536  
SOLVENT CDCl3  
NS 1024  
DS 4  
SWH 24038.461 Hz  
FIDRES 0.733596 Hz  
AQ 1.3631488 sec  
RG 198.36  
DW 20.800 usec  
DE 6.50 usec  
TE 292.4 K  
D1 2.00000000 sec  
D11 0.03000000 sec  
TD0 1  
SFO1 100.6228298 MHz  
NUC1 13C  
P1 10.00 usec  
PLW1 75.84400177 W  
SFO2 400.1316005 MHz  
NUC2 1H  
CPDPRG[2] waltz16  
PCPD2 90.00 usec  
PLW2 16.43099976 W  
PLW12 0.20286000 W  
PLW13 0.10204000 W

F2 - Processing parameters  
SI 32768  
SF 100.6127599 MHz  
WDW EM  
SSB 0  
LB 1.00 Hz  
GB 0  
FC 1.40



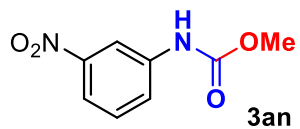

<sup>1</sup>H NMR (400 MHz, CDCl<sub>3</sub>)

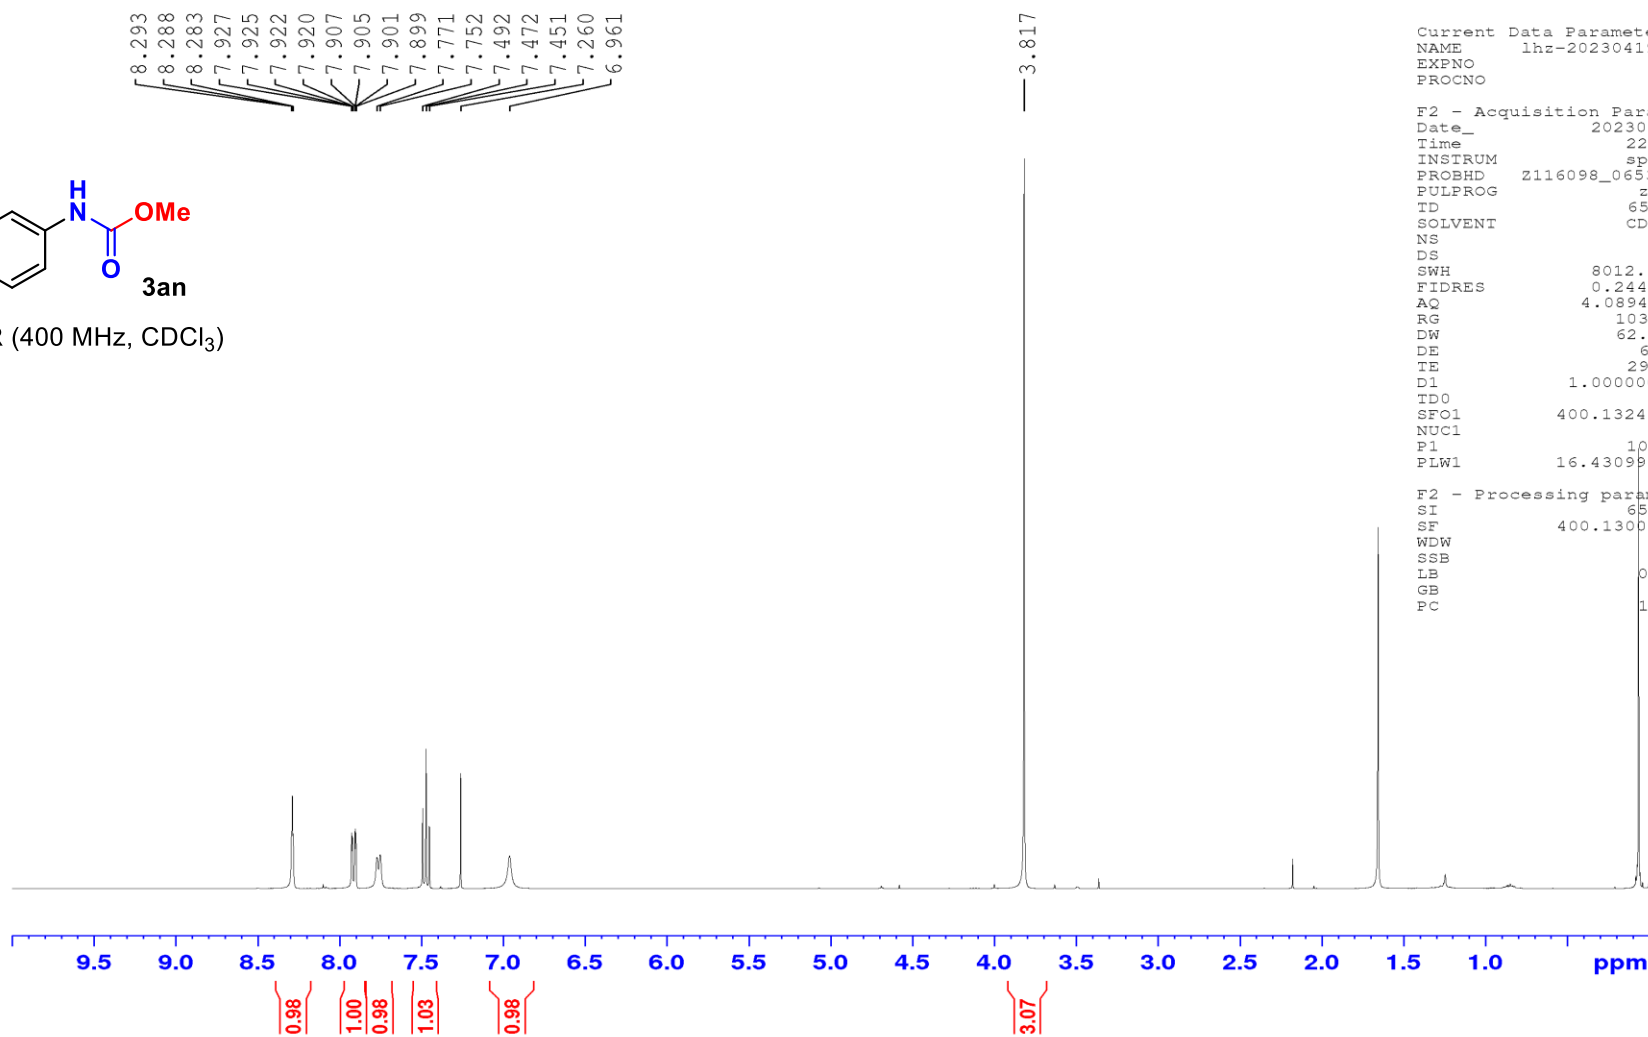

Current Data Parameters  
 NAME lhz-20230419-2  
 EXPNO 1  
 PROCNO 1

F2 - Acquisition Parameters  
 Date\_ 20230419  
 Time 22.39 h  
 INSTRUM spect  
 PROBHD Z116098\_0653 (  
 PULPROG zg30  
 TD 65536  
 SOLVENT CDCl3  
 NS 16  
 DS 2  
 SWH 8012.820 Hz  
 FIDRES 0.244532 Hz  
 AQ 4.0894465 sec  
 RG 103.14  
 DW 62.400 usec  
 DE 6.50 usec  
 TE 292.0 K  
 D1 1.00000000 sec  
 TD0 1  
 SFO1 400.1324708 MHz  
 NUC1 1H  
 P1 10.00 usec  
 PLW1 16.43099976 W

F2 - Processing parameters  
 SI 65536  
 SF 400.1300099 MHz  
 WDW EM  
 SSB 0  
 LB 0.30 Hz  
 GB 0  
 PC 1.00

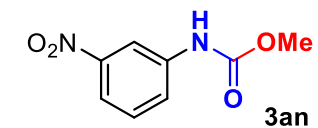

<sup>13</sup>C NMR (100 MHz, CDCl<sub>3</sub>)

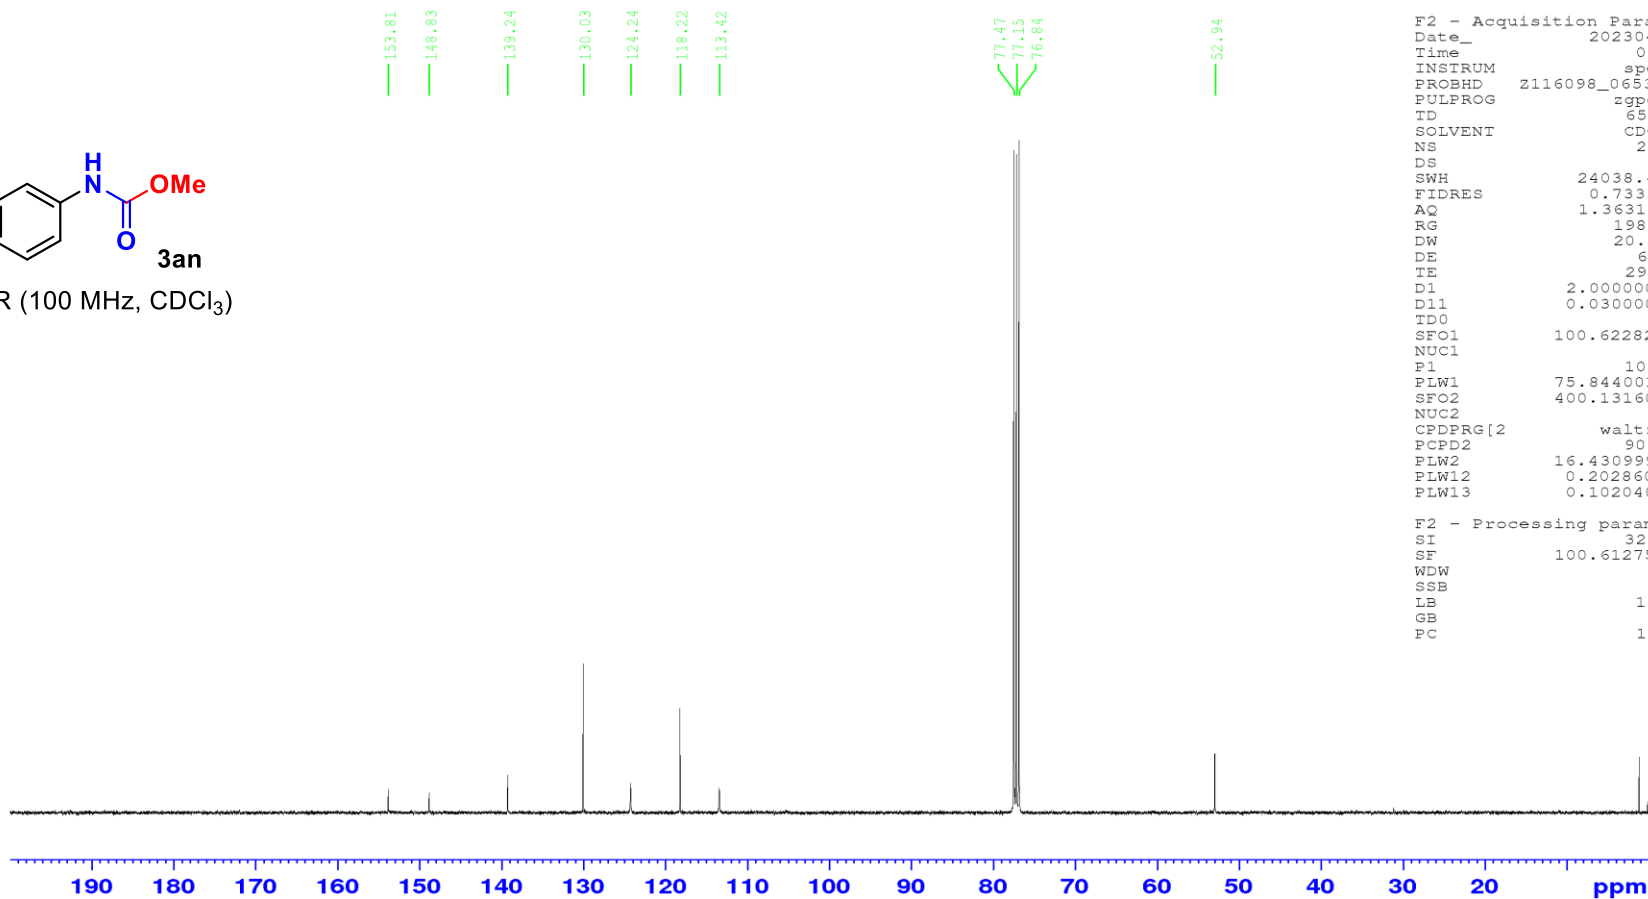

Current Data Parameters  
NAME lhz-20230419-2  
EXPNO 2  
PROCNO 1

F2 - Acquisition Parameters  
Date\_ 20230420  
Time 0.35 h  
INSTRUM spect  
PROBHD z116098\_0653 (  
PULPROG zgpg30  
TD 65536  
SOLVENT CDCl3  
NS 2000  
DS 4  
SWH 24038.461 Hz  
FIDRES 0.733596 Hz  
AQ 1.3631488 sec  
RG 198.36  
DW 20.800 usec  
DE 6.50 usec  
TE 292.6 K  
D1 2.00000000 sec  
D11 0.03000000 sec  
TD0 1  
SFO1 100.6228298 MHz  
NUC1 13C  
P1 10.00 usec  
PLW1 75.84400177 W  
SFO2 400.1316005 MHz  
NUC2 1H  
CPDPRG[2] waltz16  
PCPD2 90.00 usec  
PLW2 16.43099976 W  
PLW12 0.20286000 W  
PLW13 0.10204000 W

F2 - Processing parameters  
SI 32768  
SF 100.6127579 MHz  
WDW EM  
SSB 0  
LB 1.00 Hz  
GB 0  
FC 1.40

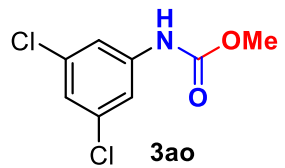

<sup>1</sup>H NMR (400 MHz, CDCl<sub>3</sub>)

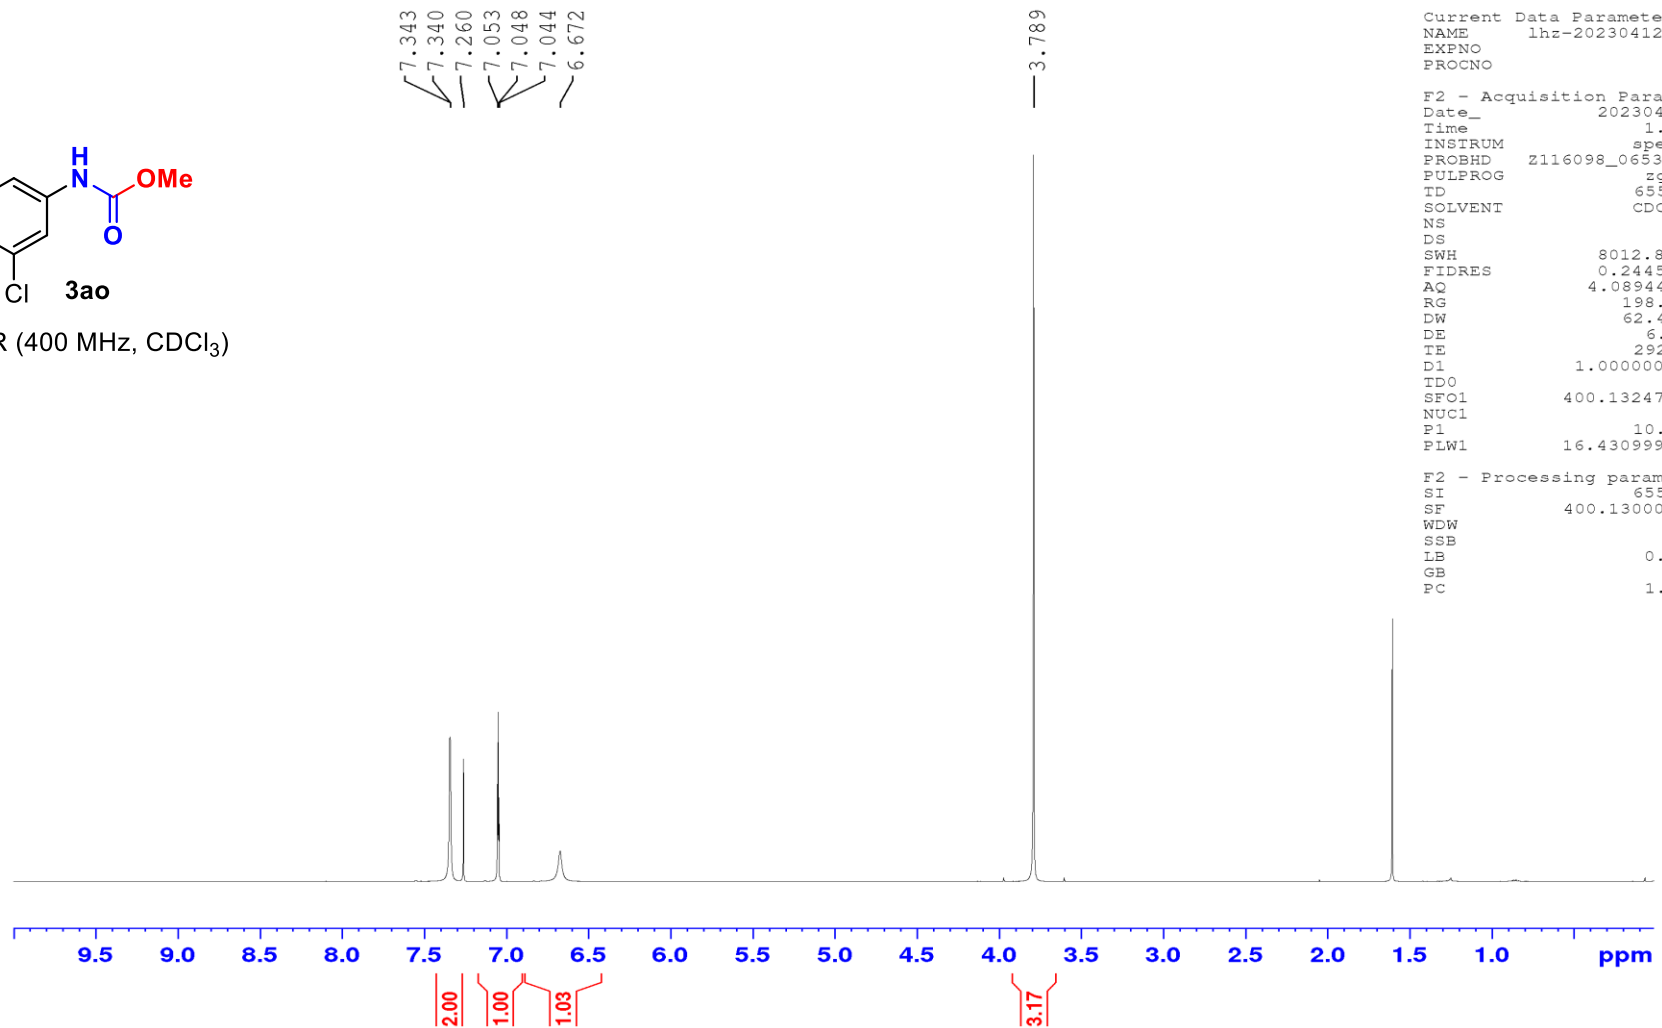

Current Data Parameters  
NAME lhz-20230412-4  
EXPNO 1  
PROCNO 1

F2 - Acquisition Parameters  
Date\_ 20230413  
Time 1.43 h  
INSTRUM spect  
PROBHD Z116098\_0653 (  
PULPROG zg30  
TD 65536  
SOLVENT CDCl3  
NS 16  
DS 2  
SWH 8012.820 Hz  
FIDRES 0.244532 Hz  
AQ 4.0894465 sec  
RG 198.36  
DW 62.400 usec  
DE 6.50 usec  
TE 292.0 K  
D1 1.00000000 sec  
TD0 1  
SFO1 400.1324708 MHz  
NUC1 1H  
P1 10.00 usec  
PLW1 16.43099976 W

F2 - Processing parameters  
SI 65536  
SF 400.1300099 MHz  
WDW EM  
SSB 0  
LB 0.30 Hz  
GB 0  
PC 1.00

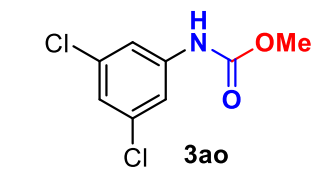

<sup>13</sup>C NMR (100 MHz, CDCl<sub>3</sub>)

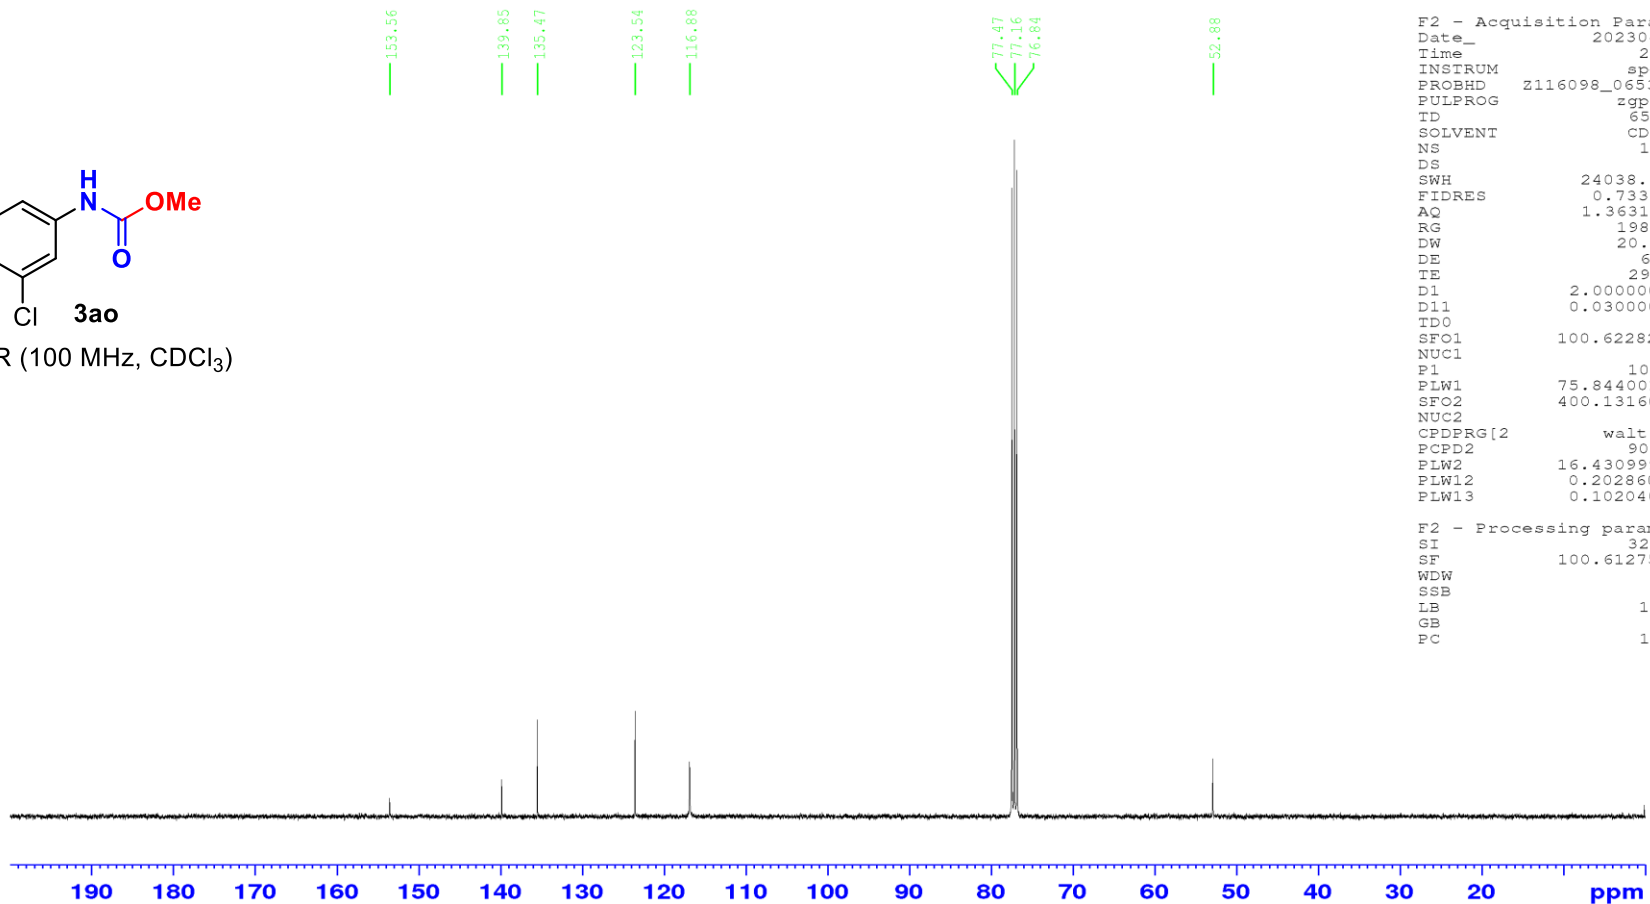

Current Data Parameters  
NAME 1hz-20230412-4  
EXPNO 2  
PROCNO 1

F2 - Acquisition Parameters  
Date\_ 20230413  
Time 2.42 h  
INSTRUM spect  
PROBHD Z116098\_0653 (  
PULPROG zgpg30  
TD 65536  
SOLVENT CDCl3  
NS 1024  
DS 4  
SWH 24038.461 Hz  
FIDRES 0.733596 Hz  
AQ 1.3631488 sec  
RG 198.36  
DW 20.800 usec  
DE 6.50 usec  
TE 292.8 K  
D1 2.00000000 sec  
D11 0.03000000 sec  
TD0 1  
SFO1 100.6228298 MHz  
NUC1 13C  
P1 10.00 usec  
PLW1 75.84400177 W  
SFO2 400.1316005 MHz  
NUC2 1H  
CPDPRG[2] waltz16  
PCPD2 90.00 usec  
PLW2 16.43099976 W  
PLW12 0.20286000 W  
PLW13 0.10204000 W

F2 - Processing parameters  
SI 32768  
SF 100.6127571 MHz  
WDW EM  
SSB 0  
LB 1.00 Hz  
GB 0  
PC 1.40

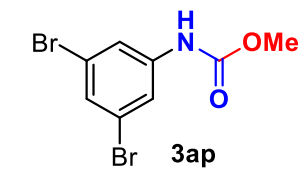

<sup>1</sup>H NMR (400 MHz, CDCl<sub>3</sub>)

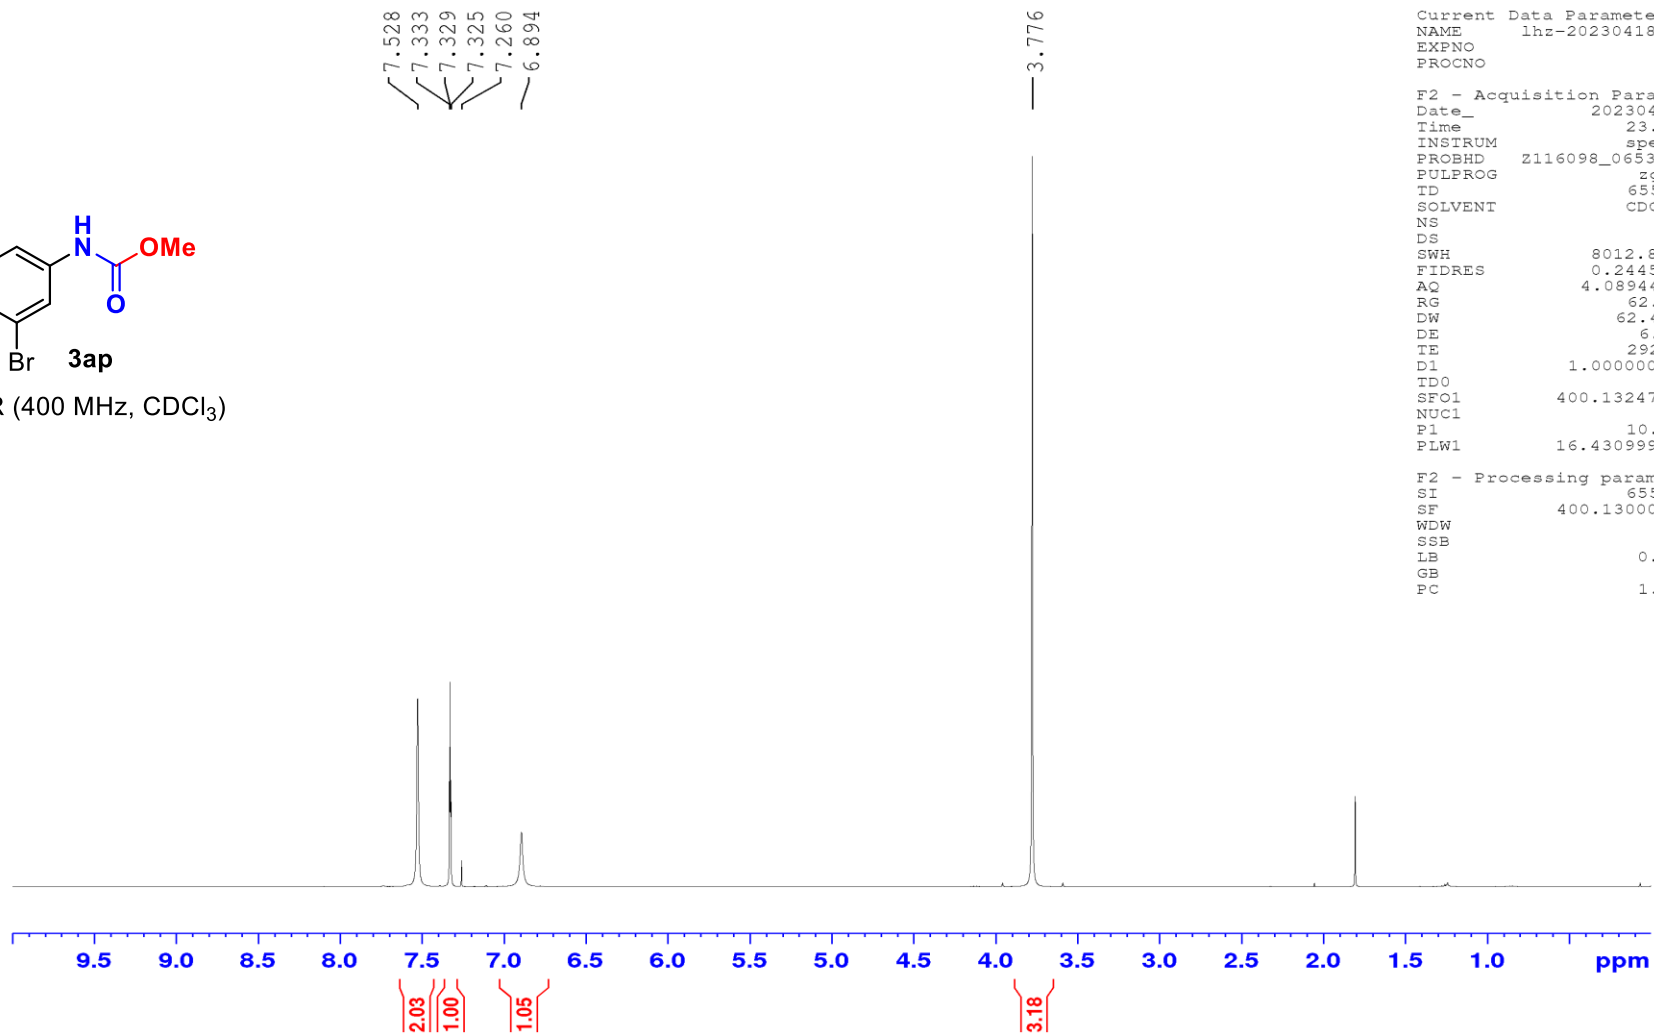

```

Current Data Parameters
NAME      lhz-20230418-2
EXPNO    1
PROCNO    1

F2 - Acquisition Parameters
Date_     20230418
Time      23.34 h
INSTRUM   spect
PROBHD    Z116098_0653 (
PULPROG   zg30
TD         65536
SOLVENT   CDCl3
NS         16
DS         2
SWH        8012.820 Hz
FIDRES     0.244532 Hz
AQ         4.0894465 sec
RG         62.98
DW         62.400 usec
DE         6.50 usec
TE         292.3 K
D1         1.00000000 sec
TDO        1
SF01       400.1324708 MHz
NUC1       1H
P1         10.00 usec
PLW1       16.43099976 W

F2 - Processing parameters
SI         65536
SF         400.1300098 MHz
WDW        EM
SSB        0
LB         0.30 Hz
GB         0
PC         1.00
  
```

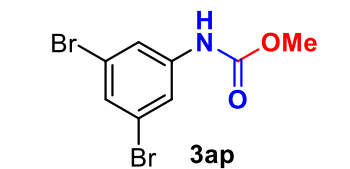

<sup>13</sup>C NMR (100 MHz, CDCl<sub>3</sub>)

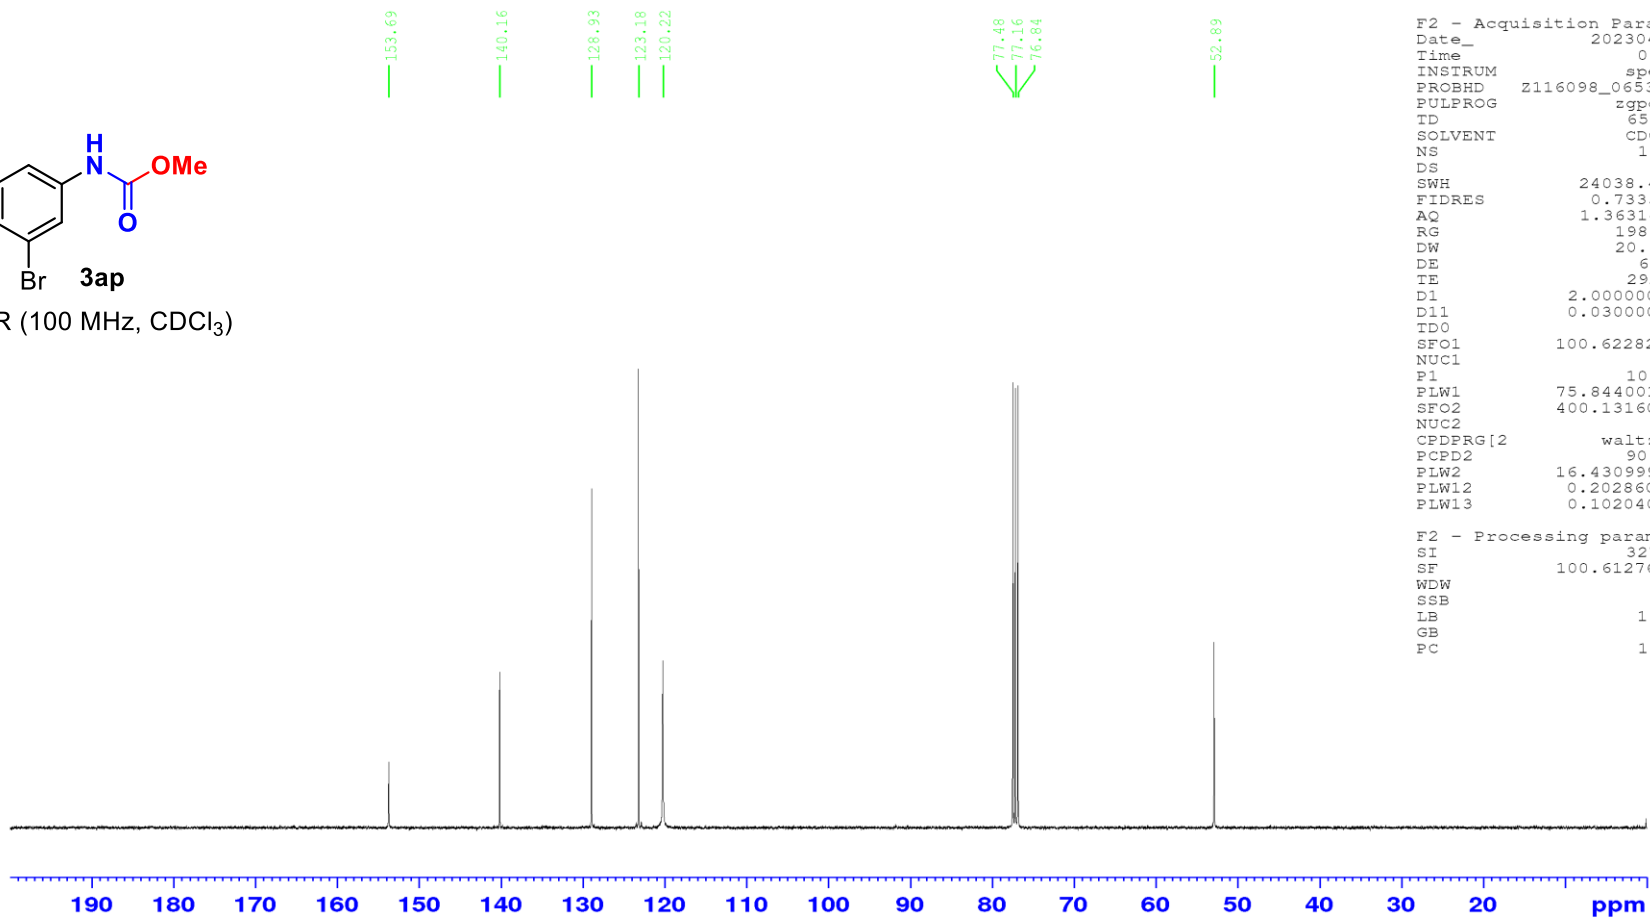

Current Data Parameters  
 NAME lhz-20230418-2  
 EXPNO 2  
 PROCNO 1

F2 - Acquisition Parameters  
 Date\_ 20230419  
 Time 0.34 h  
 INSTRUM spect  
 PROBHD Z116098\_0653 (  
 PULPROG zgpg30  
 TD 65536  
 SOLVENT CDCl3  
 NS 1024  
 DS 4  
 SWH 24038.461 Hz  
 FIDRES 0.733596 Hz  
 AQ 1.3631488 sec  
 RG 198.36  
 DW 20.800 usec  
 DE 6.50 usec  
 TE 292.6 K  
 D1 2.00000000 sec  
 D11 0.03000000 sec  
 TD0 1  
 SFO1 100.6228298 MHz  
 NUC1 13C  
 P1 10.00 usec  
 PLW1 75.84400177 W  
 SFO2 400.1316005 MHz  
 NUC2 1H  
 CPDPRG[2] waltz16  
 PCPD2 90.00 usec  
 PLW2 16.43099976 W  
 PLW12 0.20286000 W  
 PLW13 0.10204000 W

F2 - Processing parameters  
 SI 32768  
 SF 100.6127609 MHz  
 WDW EM  
 SSB 0  
 LB 1.00 Hz  
 GB 0  
 FC 1.40

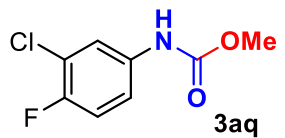

<sup>1</sup>H NMR (400 MHz, CDCl<sub>3</sub>)

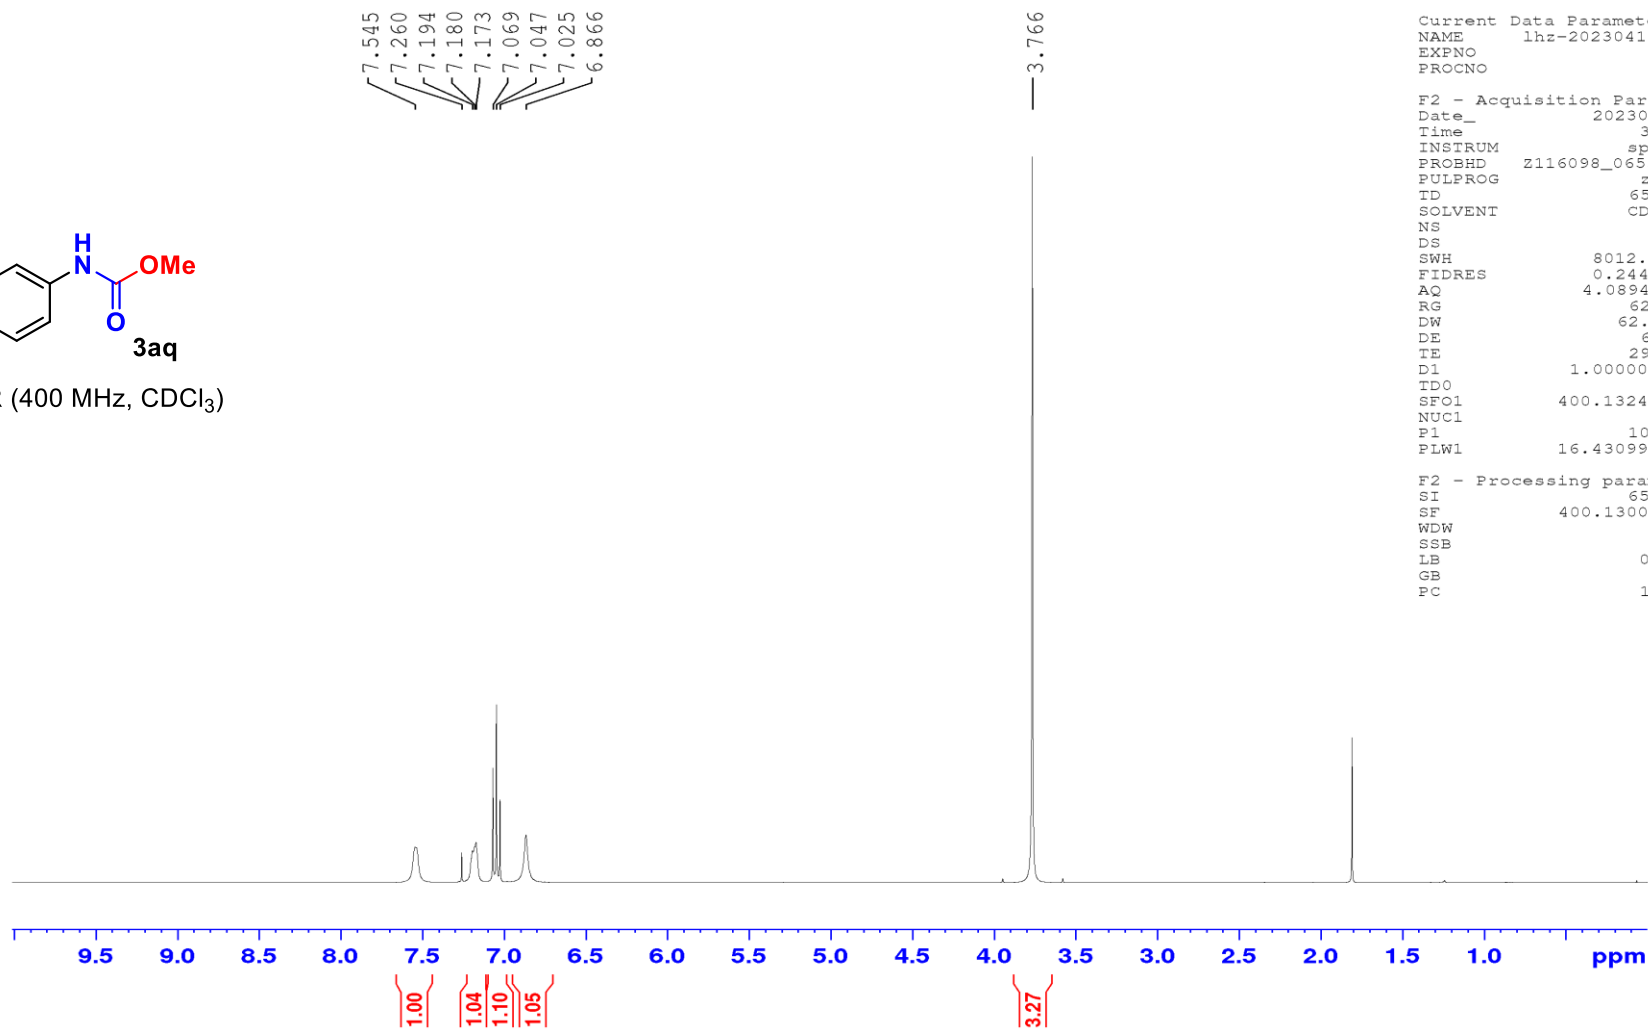

Current Data Parameters  
NAME lhz-20230414-6  
EXPNO 1  
PROCNO 1

F2 - Acquisition Parameters  
Date\_ 20230415  
Time 3.45 h  
INSTRUM spect  
PROBHD Z116098\_0653 (  
PULPROG zg30  
TD 65536  
SOLVENT CDCl3  
NS 16  
DS 2  
SWH 8012.820 Hz  
FIDRES 0.244532 Hz  
AQ 4.0894465 sec  
RG 62.98  
DW 62.400 usec  
DE 6.50 usec  
TE 292.0 K  
D1 1.00000000 sec  
TD0 1  
SFO1 400.1324708 MHz  
NUC1 1H  
P1 10.00 usec  
PLW1 16.43099976 W

F2 - Processing parameters  
SI 65536  
SF 400.1300098 MHz  
WDW EM  
SSB 0  
LB 0.30 Hz  
GB 0  
FC 1.00

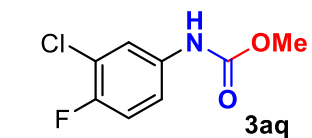

<sup>13</sup>C NMR (100 MHz, CDCl<sub>3</sub>)

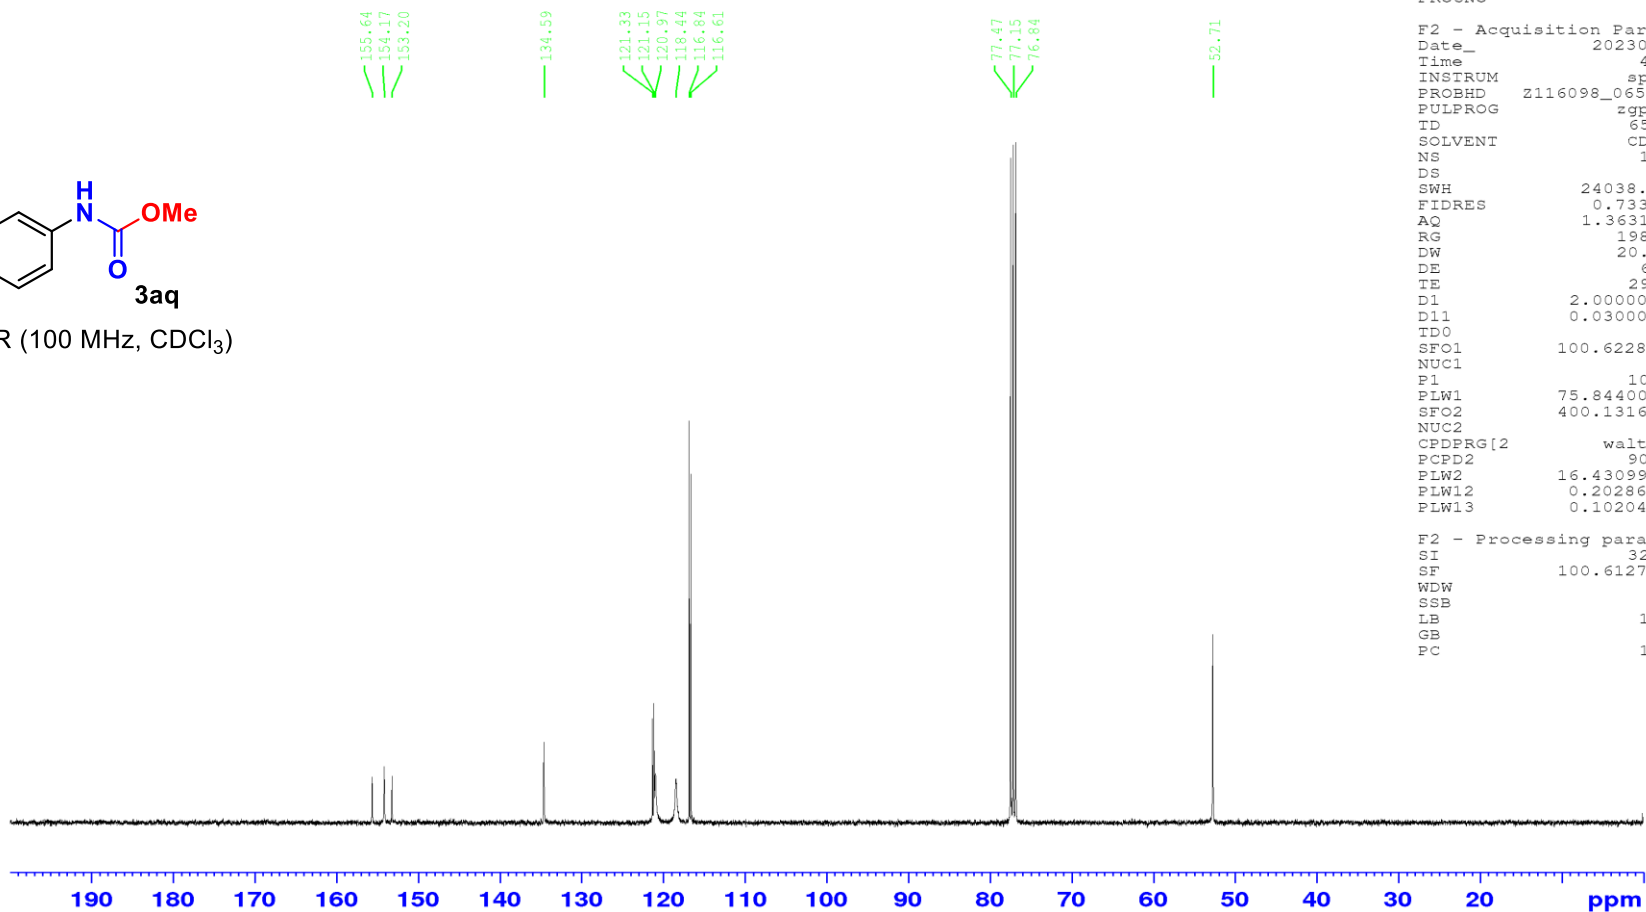

Current Data Parameters  
NAME lhz-20230414-6  
EXPNO 2  
PROCNO 1

F2 - Acquisition Parameters  
Date\_ 20230415  
Time 4.45 h  
INSTRUM spect  
PROBHD Z116098\_0653 (  
PULPROG zgpg30  
TD 65536  
SOLVENT CDCl3  
NS 1024  
DS 4  
SWH 24038.461 Hz  
FIDRES 0.733596 Hz  
AQ 1.3631488 sec  
RG 198.36  
DW 20.800 usec  
DE 6.50 usec  
TE 292.7 K  
D1 2.00000000 sec  
D11 0.03000000 sec  
TD0 1  
SFO1 100.6228298 MHz  
NUC1 13C  
P1 10.00 usec  
PLW1 75.84400177 W  
SFO2 400.1316005 MHz  
NUC2 1H  
CPDPRG[2] waltz16  
PCPD2 90.00 usec  
PLW2 16.43099976 W  
PLW12 0.20286000 W  
PLW13 0.10204000 W

F2 - Processing parameters  
SI 32768  
SF 100.6127601 MHz  
WDW EM  
SSB 0  
LB 1.00 Hz  
GB 0  
PC 1.40



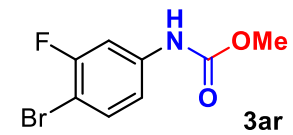

<sup>1</sup>H NMR (400 MHz, CDCl<sub>3</sub>)

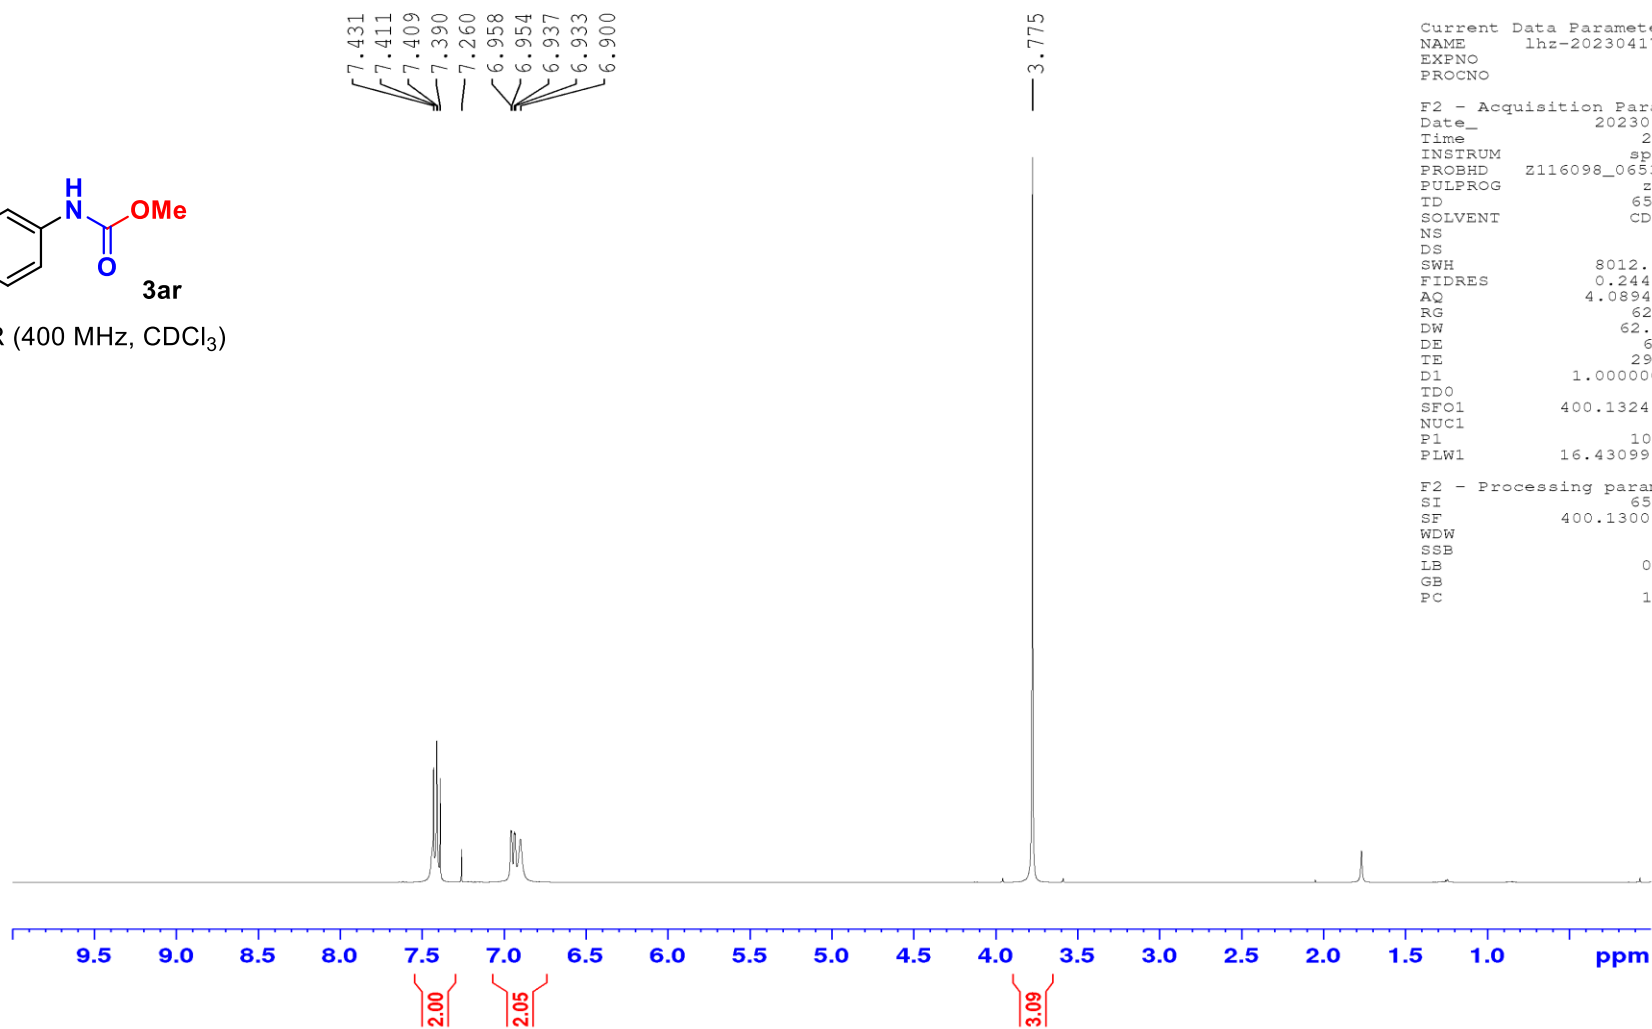

Current Data Parameters  
NAME lhz-20230417-5  
EXPNO 1  
PROCNO 1

F2 - Acquisition Parameters  
Date\_ 20230418  
Time 2.39 h  
INSTRUM spect  
PROBHD z116098\_0653 (  
PULPROG zg30  
TD 65536  
SOLVENT CDCl3  
NS 16  
DS 2  
SWH 8012.820 Hz  
FIDRES 0.244532 Hz  
AQ 4.0894465 sec  
RG 62.98  
DW 62.400 usec  
DE 6.50 usec  
TE 292.3 K  
D1 1.00000000 sec  
TD0 1  
SFO1 400.1324708 MHz  
NUC1 1H  
P1 10.00 usec  
PLW1 16.43099976 W

F2 - Processing parameters  
SI 65536  
SF 400.1300098 MHz  
WDW EM  
SSB 0  
LB 0.30 Hz  
GB 0  
PC 1.00

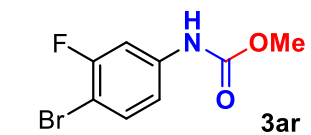

<sup>13</sup>C NMR (100 MHz, CDCl<sub>3</sub>)

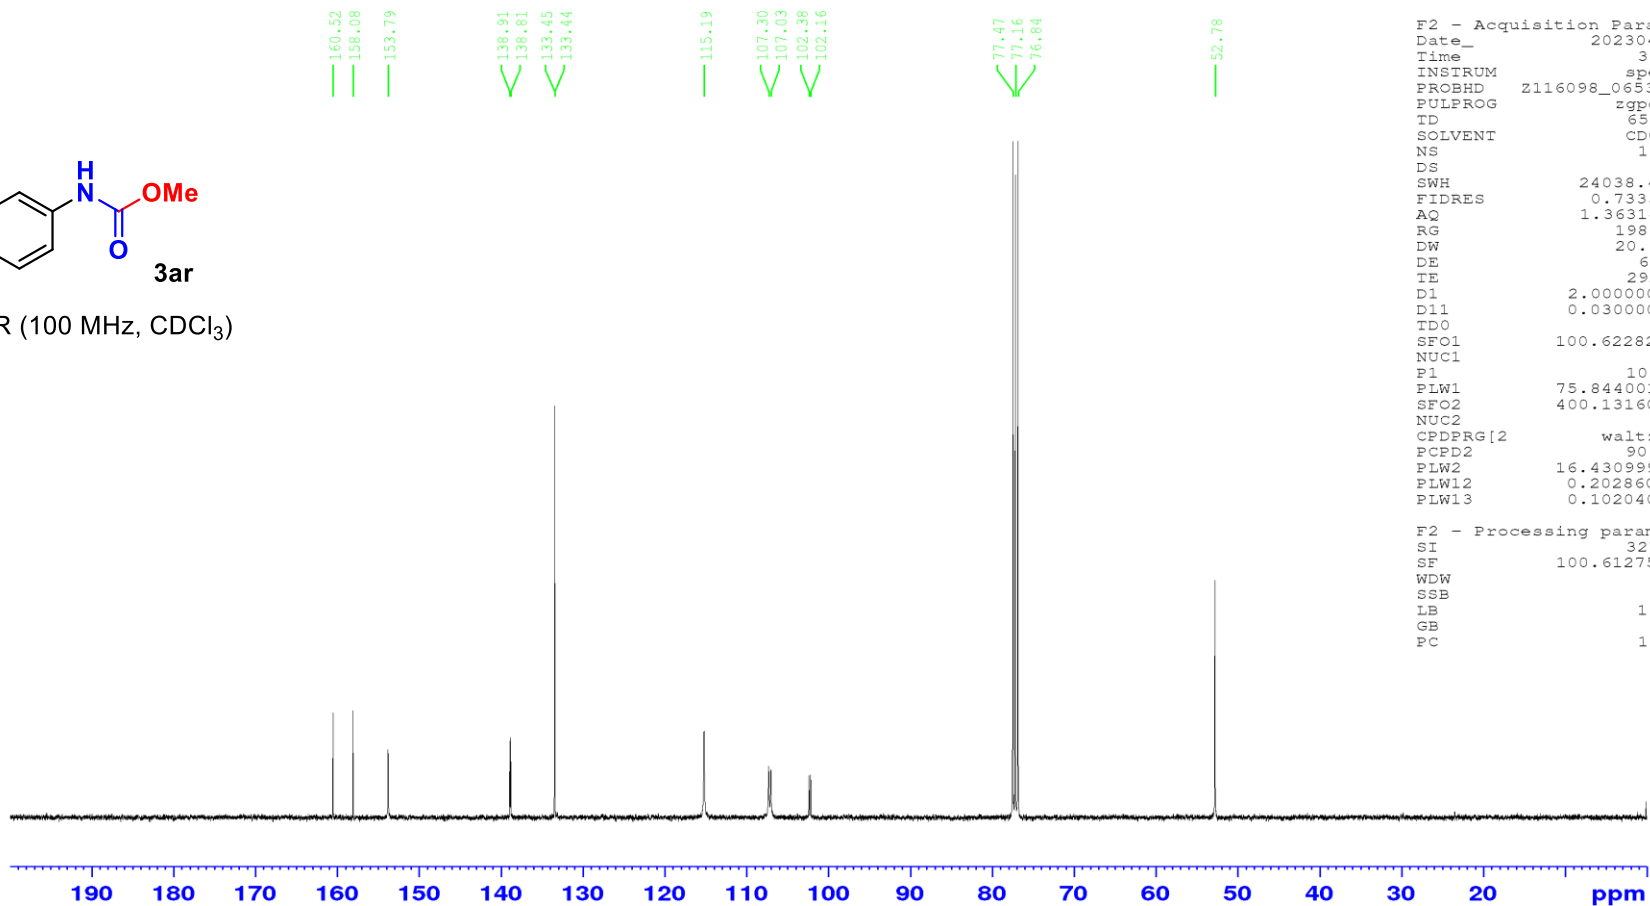

Current Data Parameters  
 NAME lhz-20230417-5  
 EXPNO 2  
 PROCNO 1

F2 - Acquisition Parameters  
 Date\_ 20230418  
 Time 3.39 h  
 INSTRUM spect  
 PROBHD Z116098\_0653 (  
 PULPROG zgpg30  
 TD 65536  
 SOLVENT CDCl3  
 NS 1024  
 DS 4  
 SWH 24038.461 Hz  
 FIDRES 0.733596 Hz  
 AQ 1.3631488 sec  
 RG 198.36  
 DW 20.800 usec  
 DE 6.50 usec  
 TE 292.6 K  
 D1 2.00000000 sec  
 D11 0.03000000 sec  
 TD0 1  
 SFO1 100.6228298 MHz  
 NUC1 13C  
 P1 10.00 usec  
 PLW1 75.84400177 W  
 SFO2 400.1316005 MHz  
 NUC2 1H  
 CPDPRG[2] waltz16  
 FCPD2 90.00 usec  
 PLW2 16.43099976 W  
 PLW12 0.20286000 W  
 PLW13 0.10204000 W

F2 - Processing parameters  
 SI 32768  
 SF 100.6127598 MHz  
 WDW EM  
 SSB 0  
 LB 1.00 Hz  
 GB 0  
 FC 1.40

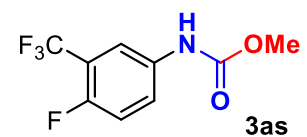

<sup>1</sup>H NMR (400 MHz, CDCl<sub>3</sub>)

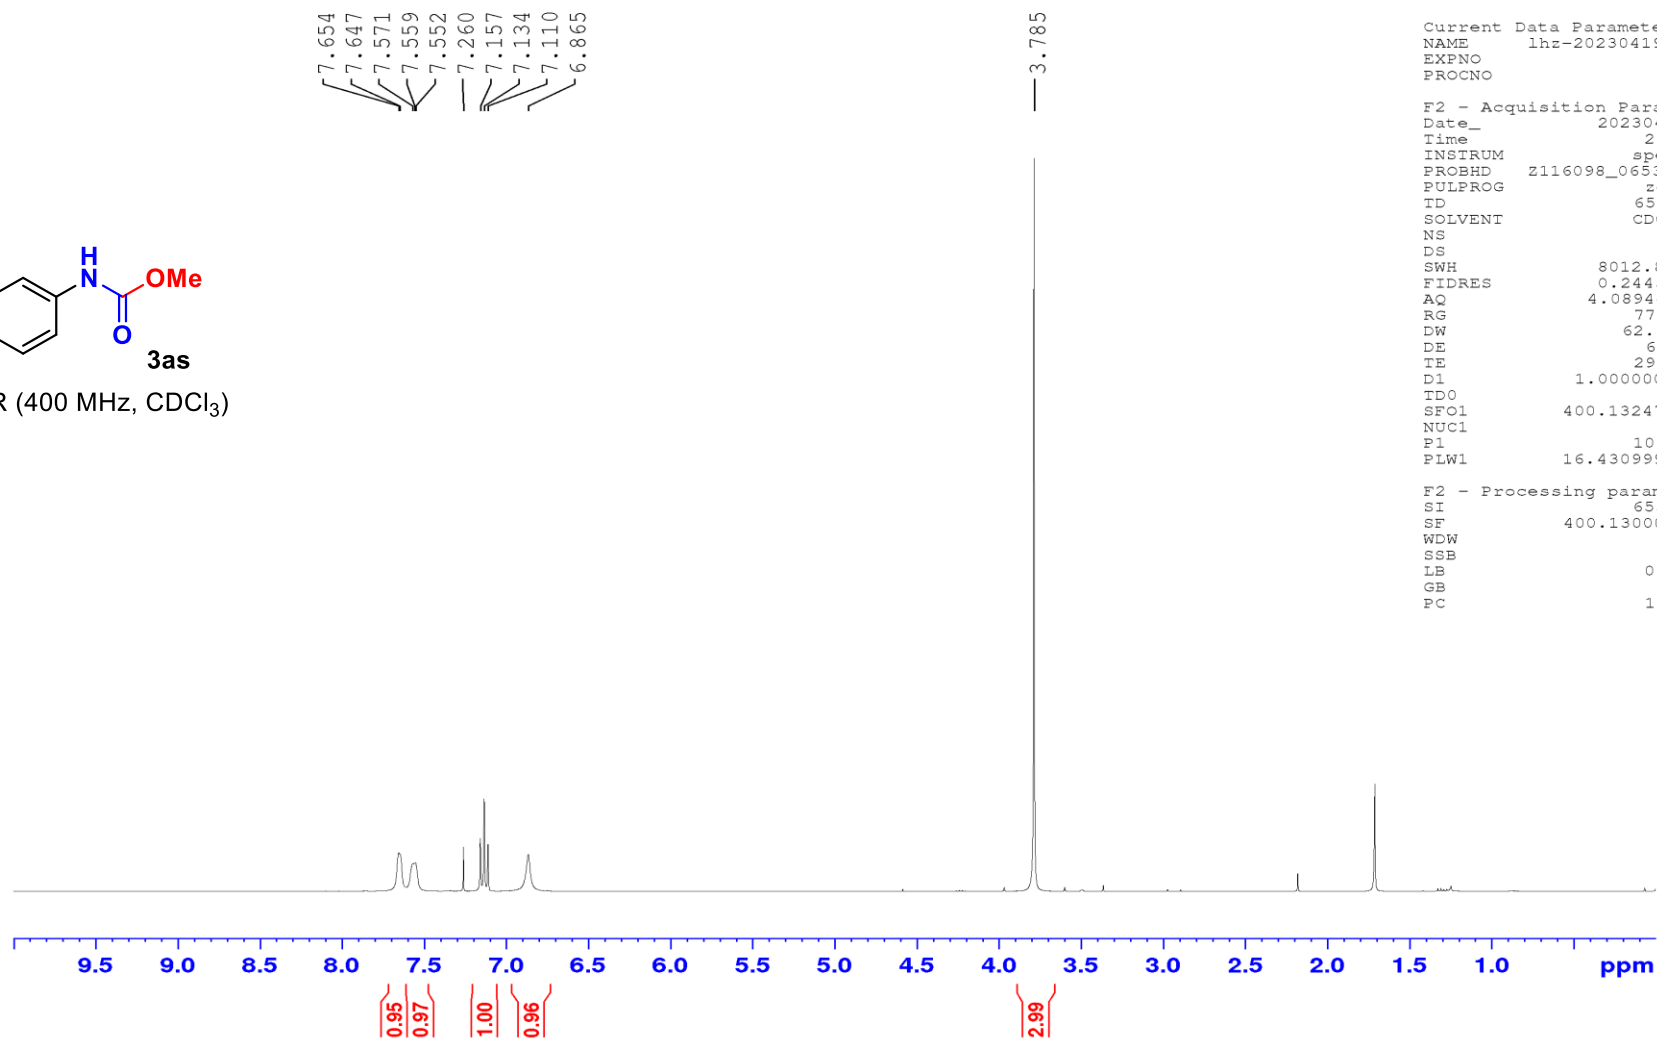

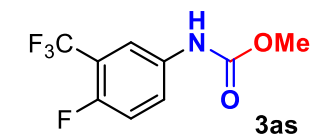

<sup>13</sup>C NMR (100 MHz, CDCl<sub>3</sub>)

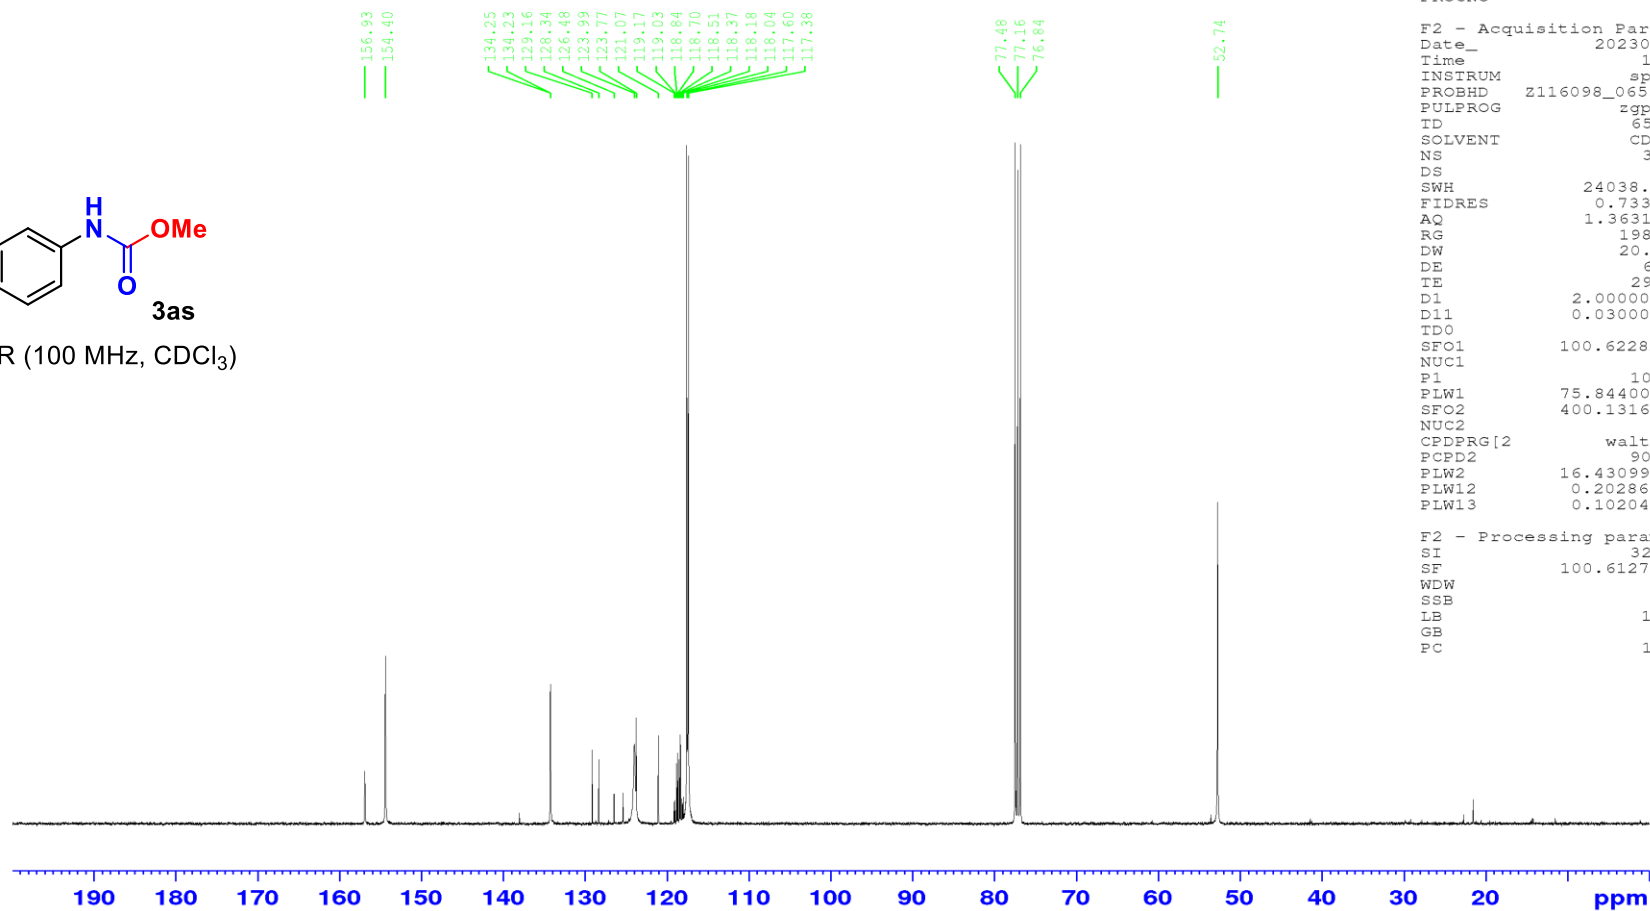

Current Data Parameters  
 NAME lhz-20230428-1  
 EXPNO 2  
 PROCNO 1

F2 - Acquisition Parameters  
 Date\_ 20230429  
 Time 1.31 h  
 INSTRUM spect  
 PROBHD Z116098\_0653 (  
 PULPROG zgpg30  
 TD 65536  
 SOLVENT CDCl3  
 NS 3333  
 DS 4  
 SWH 24038.461 Hz  
 FIDRES 0.733596 Hz  
 AQ 1.3631488 sec  
 RG 198.36  
 DW 20.800 usec  
 DE 6.50 usec  
 TE 292.3 K  
 D1 2.00000000 sec  
 D11 0.03000000 sec  
 TD0 1  
 SFO1 100.6228298 MHz  
 NUC1 13C  
 P1 10.00 usec  
 PLW1 75.84400177 W  
 SFO2 400.1316005 MHz  
 NUC2 1H  
 CPDPRG[2] waltz16  
 PCPD2 90.00 usec  
 PLW2 16.43099976 W  
 PLW12 0.20286000 W  
 PLW13 0.10204000 W

F2 - Processing parameters  
 SI 32768  
 SF 100.6127580 MHz  
 WDW EM  
 SSB 0  
 LB 1.00 Hz  
 GB 0  
 FC 1.40

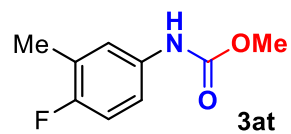

<sup>1</sup>H NMR (400 MHz, CDCl<sub>3</sub>)

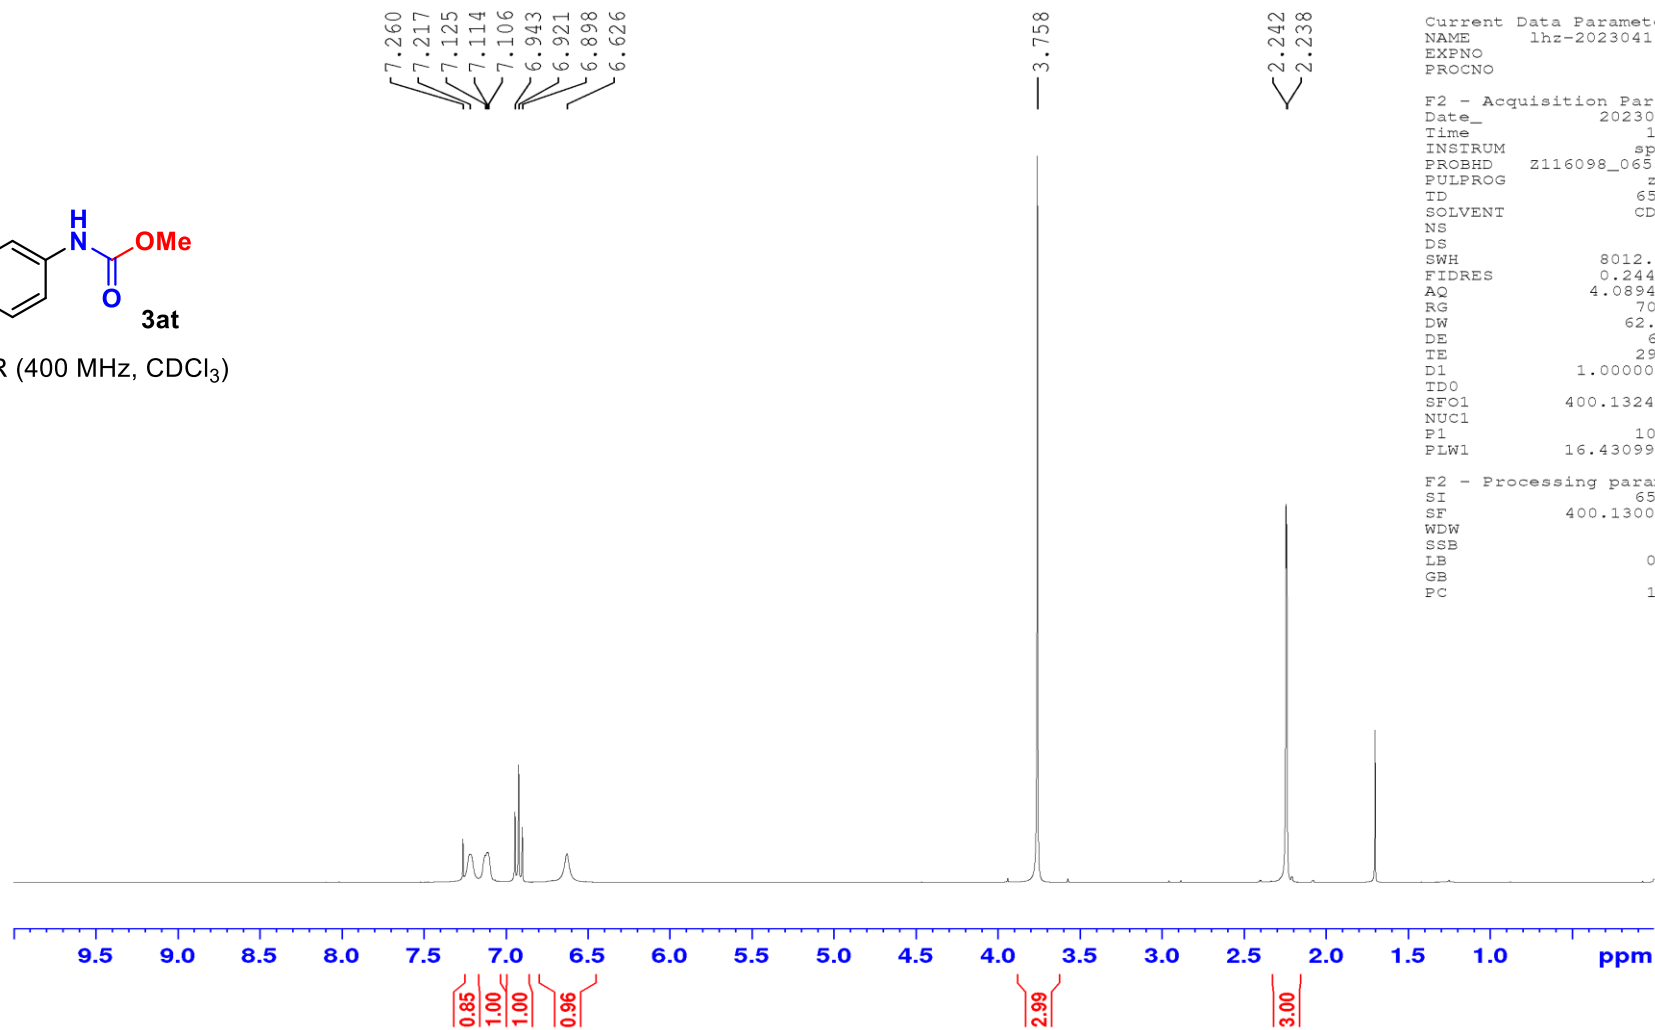

Current Data Parameters  
NAME lhz-20230417-4  
EXPNO 1  
PROCNO 1

F2 - Acquisition Parameters  
Date\_ 20230418  
Time 1.35 h  
INSTRUM spect  
PROBHD Z116098\_0653 (  
PULPROG zg30  
ID 65536  
SOLVENT CDCl3  
NS 16  
DS 2  
SWH 8012.820 Hz  
FIDRES 0.244532 Hz  
AQ 4.0894465 sec  
RG 70.89  
DW 62.400 usec  
DE 6.50 usec  
TE 292.4 K  
D1 1.00000000 sec  
TD0 1  
SFO1 400.1324708 MHz  
NUC1 1H  
P1 10.00 usec  
PLW1 16.43099976 W

F2 - Processing parameters  
SI 65536  
SF 400.1300098 MHz  
WDW EM  
SSB 0  
LB 0.30 Hz  
GB 0  
PC 1.00

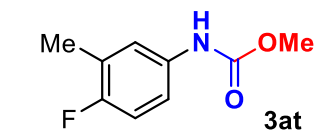

<sup>13</sup>C NMR (100 MHz, CDCl<sub>3</sub>)

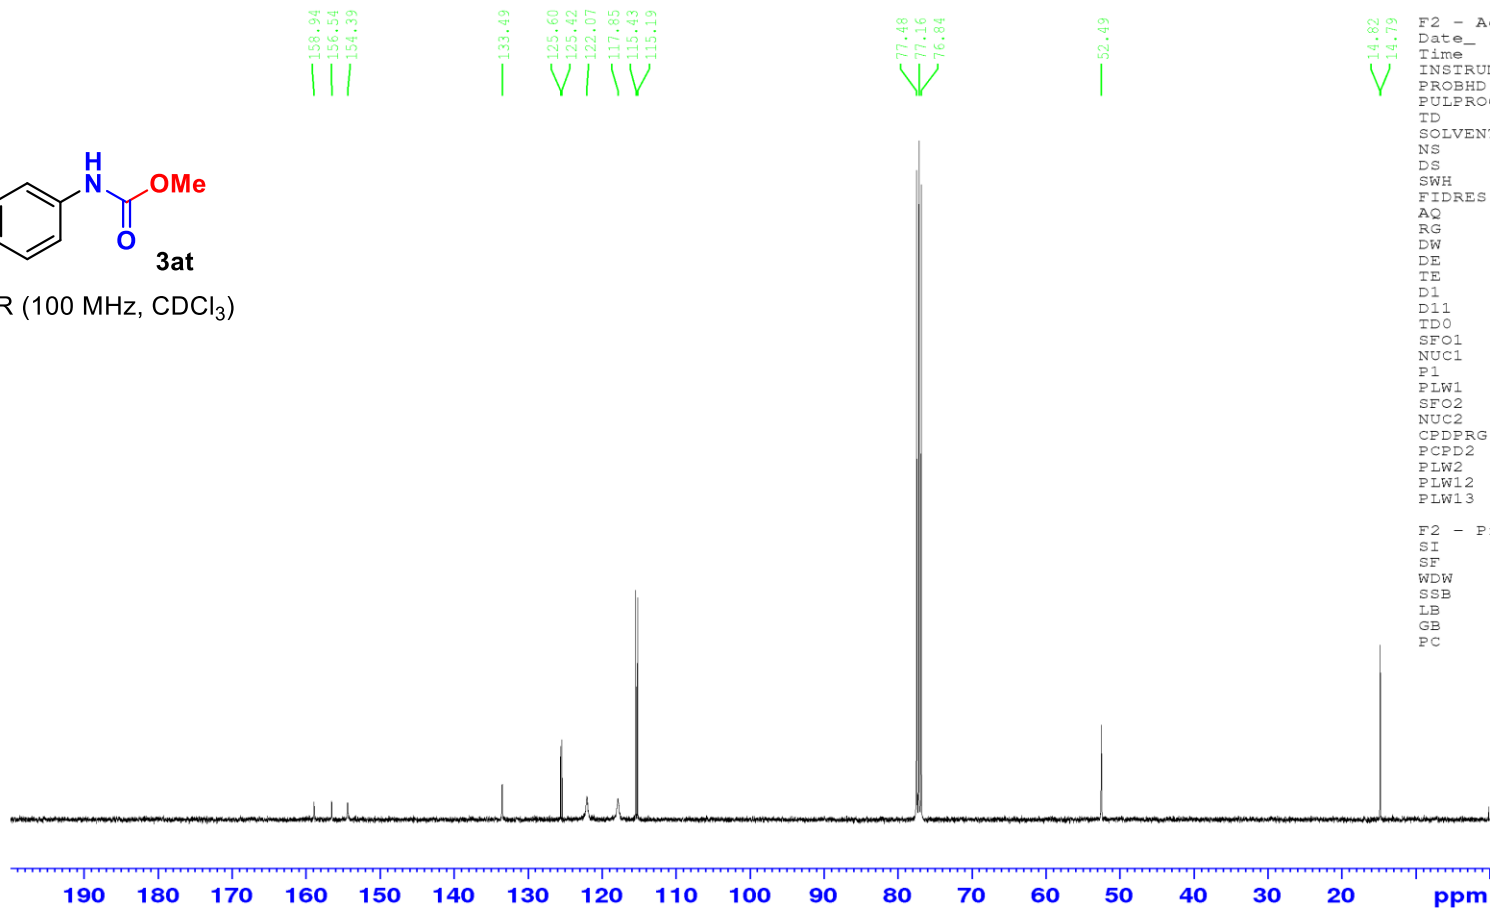

Current Data Parameters  
NAME lhz-20230417-4  
EXPNO 2  
PROCNO 1

F2 - Acquisition Parameters  
Date\_ 20230418  
Time 2.35 h  
INSTRUM spect  
PROBHD Z116098\_0653 (  
PULPROG zgpg30  
TD 65536  
SOLVENT CDCl3  
NS 1024  
DS 4  
SWH 24038.461 Hz  
FIDRES 0.733596 Hz  
AQ 1.3631488 sec  
RG 198.36  
DW 20.800 usec  
DE 6.50 usec  
TE 292.6 K  
D1 2.00000000 sec  
D11 0.03000000 sec  
TD0 1  
SFO1 100.6228298 MHz  
NUC1 13C  
P1 10.00 usec  
PLW1 75.84400177 W  
SFO2 400.1316005 MHz  
NUC2 1H  
CPDPRG[2] waltz16  
PCPD2 90.00 usec  
PLW2 16.43099976 W  
PLW12 0.20286000 W  
PLW13 0.10204000 W

F2 - Processing parameters  
SI 32768  
SF 100.6127586 MHz  
WDW EM  
SSB 0  
LB 1.00 Hz  
GB 0  
PC 1.40

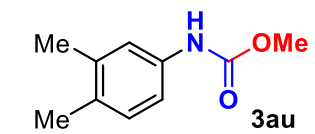

<sup>1</sup>H NMR (400 MHz, CDCl<sub>3</sub>)

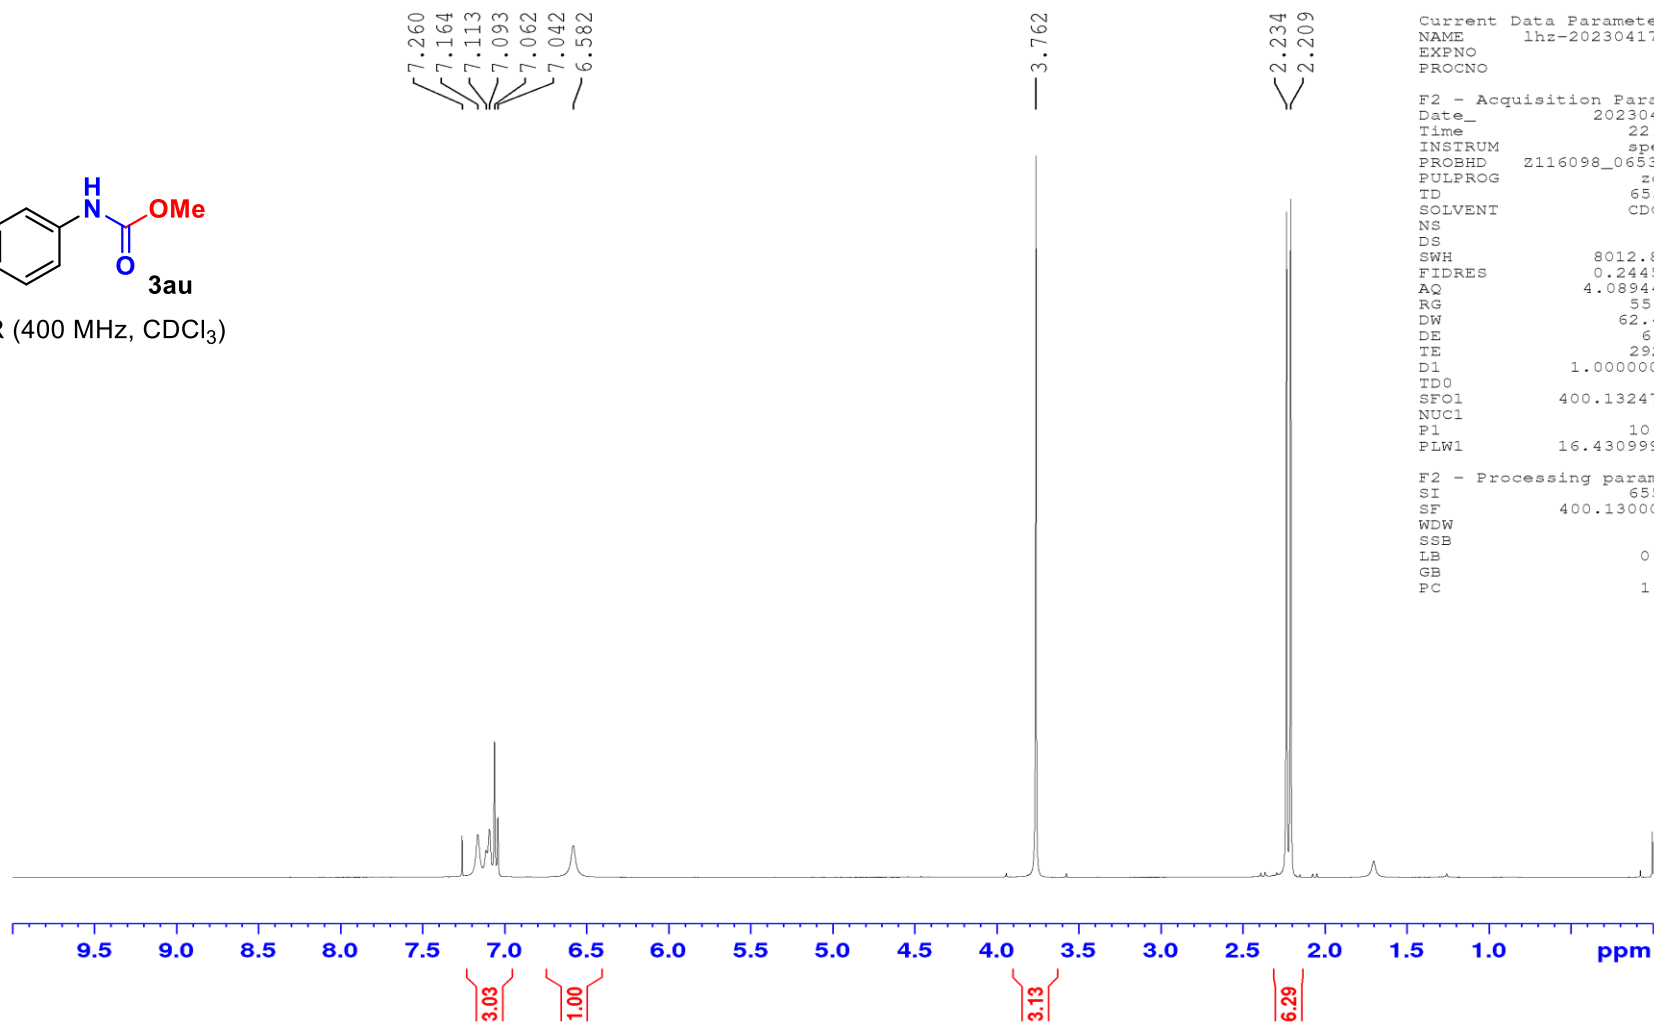

Current Data Parameters  
NAME lhz-20230417-1  
EXPNO 1  
PROCNO 1

F2 - Acquisition Parameters  
Date\_ 20230417  
Time 22.23 h  
INSTRUM spect  
PROBHD Z116098\_0653 (  
PULPROG zg30  
TD 65536  
SOLVENT CDCl3  
NS 16  
DS 2  
SWH 8012.820 Hz  
FIDRES 0.244532 Hz  
AQ 4.0894465 sec  
RG 55.99  
DW 62.400 usec  
DE 6.50 usec  
TE 292.0 K  
D1 1.00000000 sec  
TD0 1  
SFO1 400.1324708 MHz  
NUC1 1H  
P1 10.00 usec  
PLW1 16.43099976 W

F2 - Processing parameters  
SI 65536  
SF 400.1300099 MHz  
WDW EM  
SSB 0  
LB 0.30 Hz  
GB 0  
PC 1.00

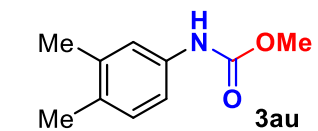

<sup>13</sup>C NMR (100 MHz, CDCl<sub>3</sub>)

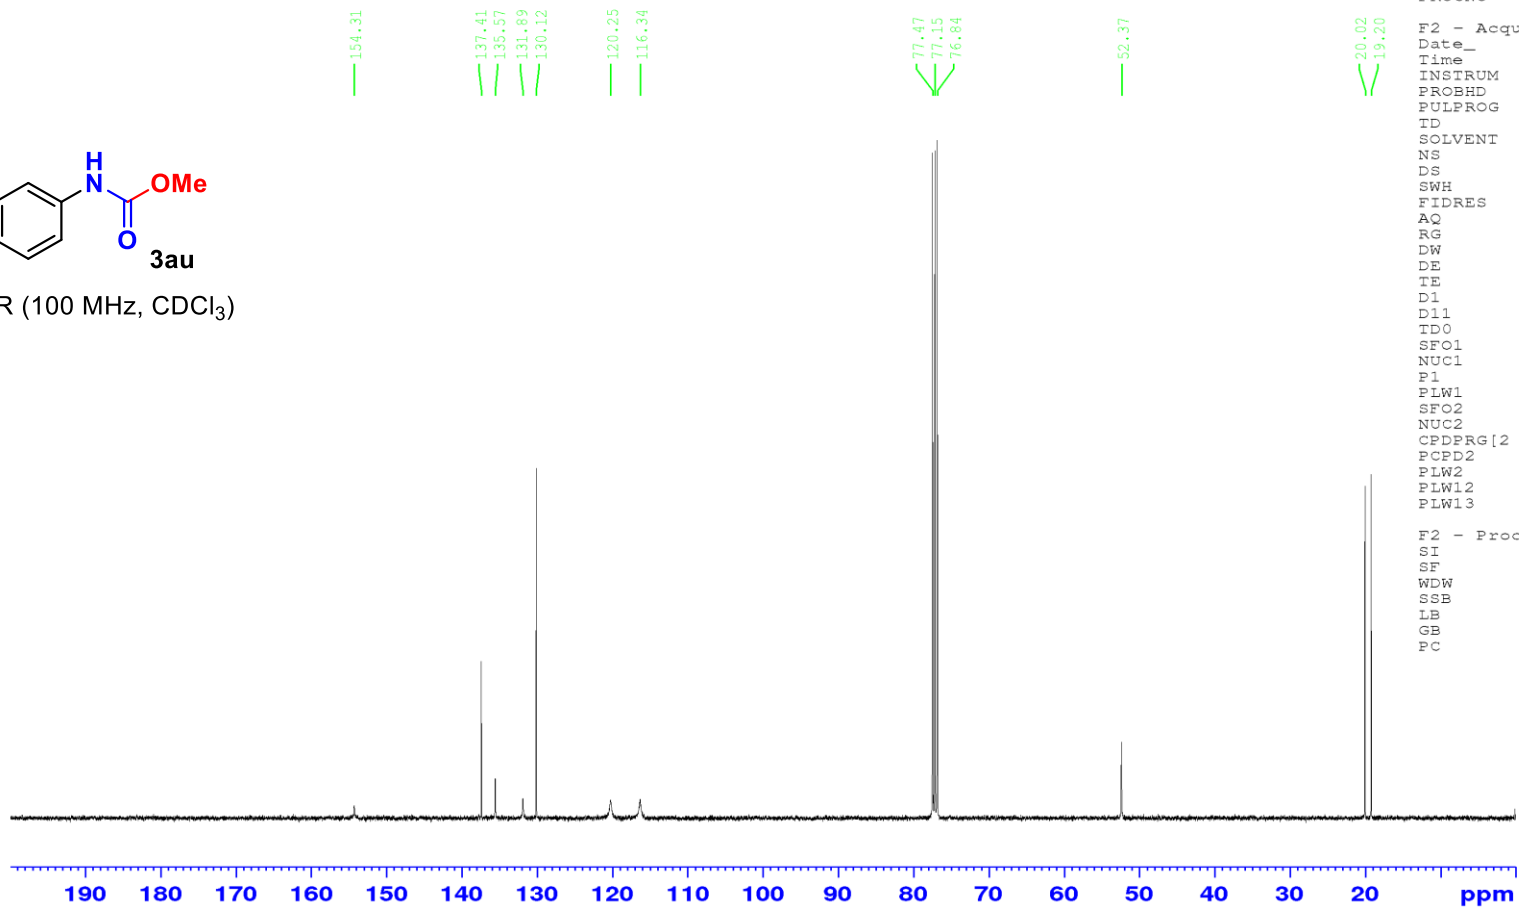

Current Data Parameters  
 NAME lhz-20230417-1  
 EXPNO 2  
 PROCNO 1

F2 - Acquisition Parameters  
 Date\_ 20230417  
 Time 23.22 h  
 INSTRUM spect  
 PROBHD Z116098\_0653 (  
 PULPROG zgpg30  
 TD 65536  
 SOLVENT CDCl3  
 NS 1024  
 DS 4  
 SWH 24038.461 Hz  
 FIDRES 0.733596 Hz  
 AQ 1.3631488 sec  
 RG 198.36  
 DW 20.800 usec  
 DE 6.50 usec  
 TE 292.4 K  
 D1 2.00000000 sec  
 D11 0.03000000 sec  
 TD0 1  
 SFO1 100.6228298 MHz  
 NUC1 13C  
 P1 10.00 usec  
 PLW1 75.84400177 W  
 SFO2 400.1316005 MHz  
 NUC2 1H  
 CPDPRG[2] waltz16  
 FCPD2 90.00 usec  
 PLW2 16.43099976 W  
 PLW12 0.20286000 W  
 PLW13 0.10204000 W

F2 - Processing parameters  
 SI 32768  
 SF 100.6127601 MHz  
 WDW EM  
 SSB 0  
 LB 1.00 Hz  
 GB 0  
 FC 1.40



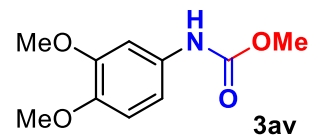

<sup>1</sup>H NMR (400 MHz, CDCl<sub>3</sub>)

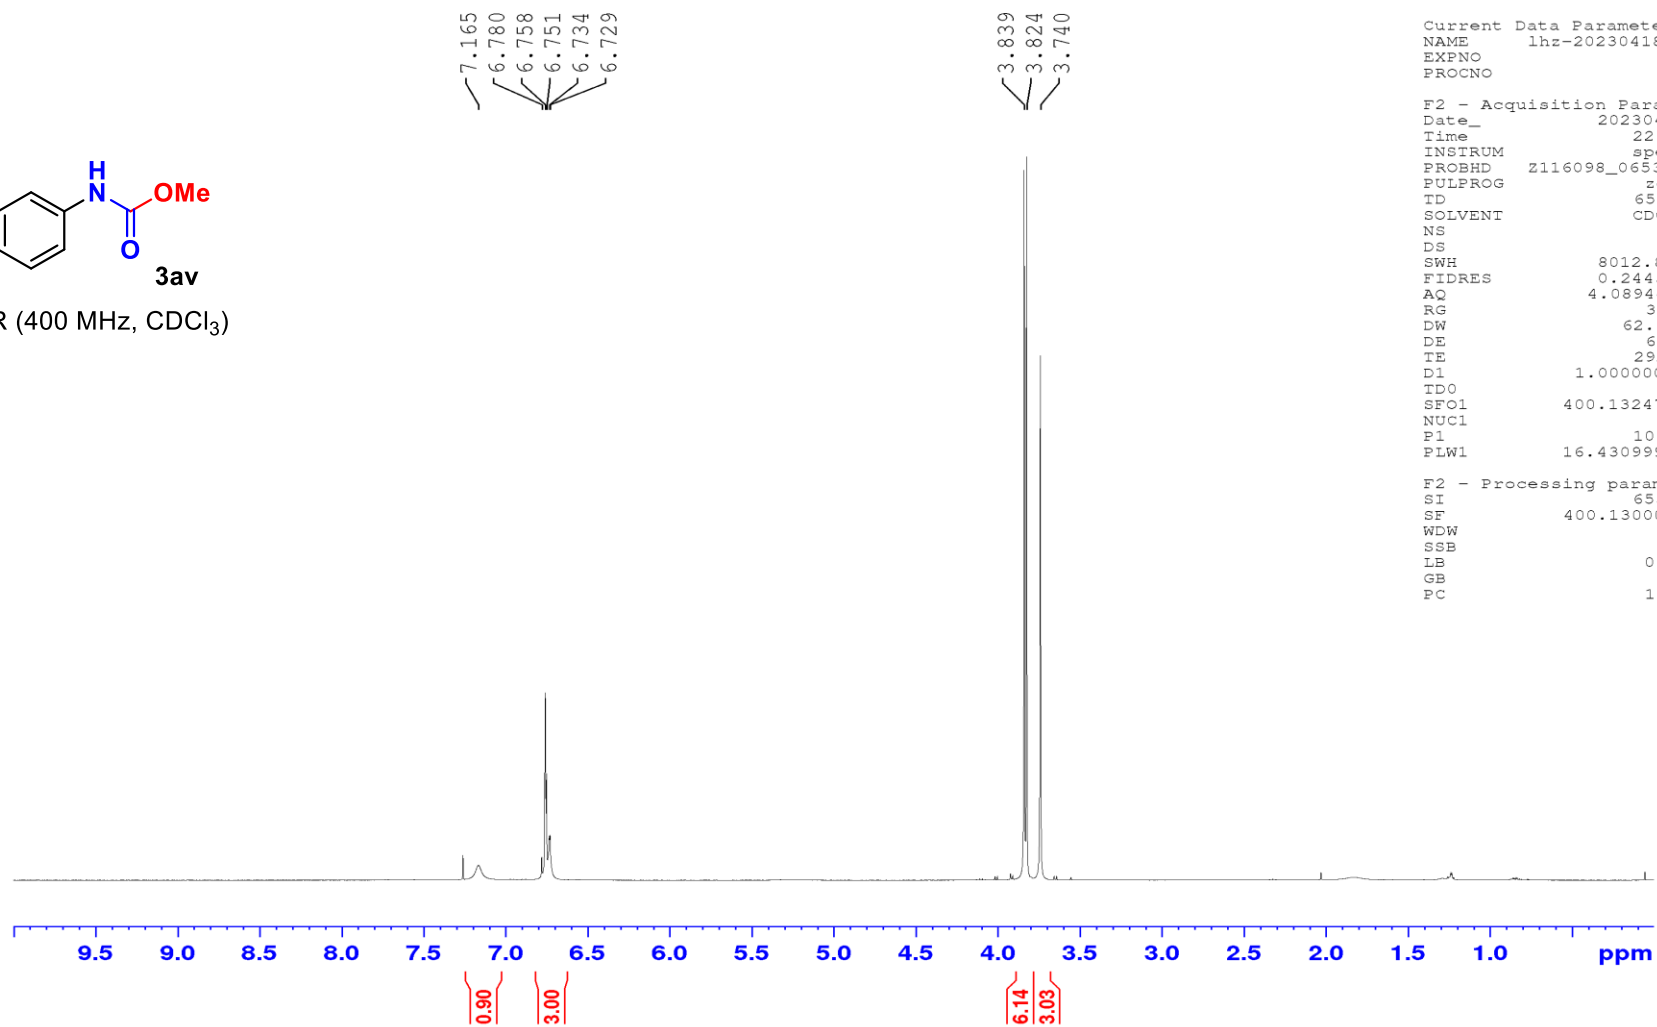

Current Data Parameters  
NAME lhz-20230418-1  
EXPNO 1  
PROCNO 1

F2 - Acquisition Parameters  
Date\_ 20230418  
Time 22.30 h  
INSTRUM spect  
PROBHD Z116098\_0653 (  
PULPROG zg30  
TD 65536  
SOLVENT CDCl3  
NS 16  
DS 2  
SWH 8012.820 Hz  
FIDRES 0.244532 Hz  
AQ 4.0894465 sec  
RG 31.9  
DW 62.400 usec  
DE 6.50 usec  
TE 292.1 K  
D1 1.00000000 sec  
TD0 1  
SFO1 400.1324708 MHz  
NUC1 1H  
P1 10.00 usec  
PLW1 16.43099976 W

F2 - Processing parameters  
SI 65536  
SF 400.1300097 MHz  
WDW EM  
SSB 0  
LB 0.30 Hz  
GB 0  
PC 1.00

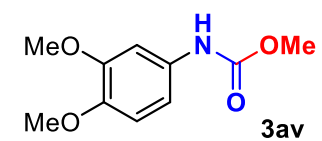

<sup>13</sup>C NMR (100 MHz, CDCl<sub>3</sub>)

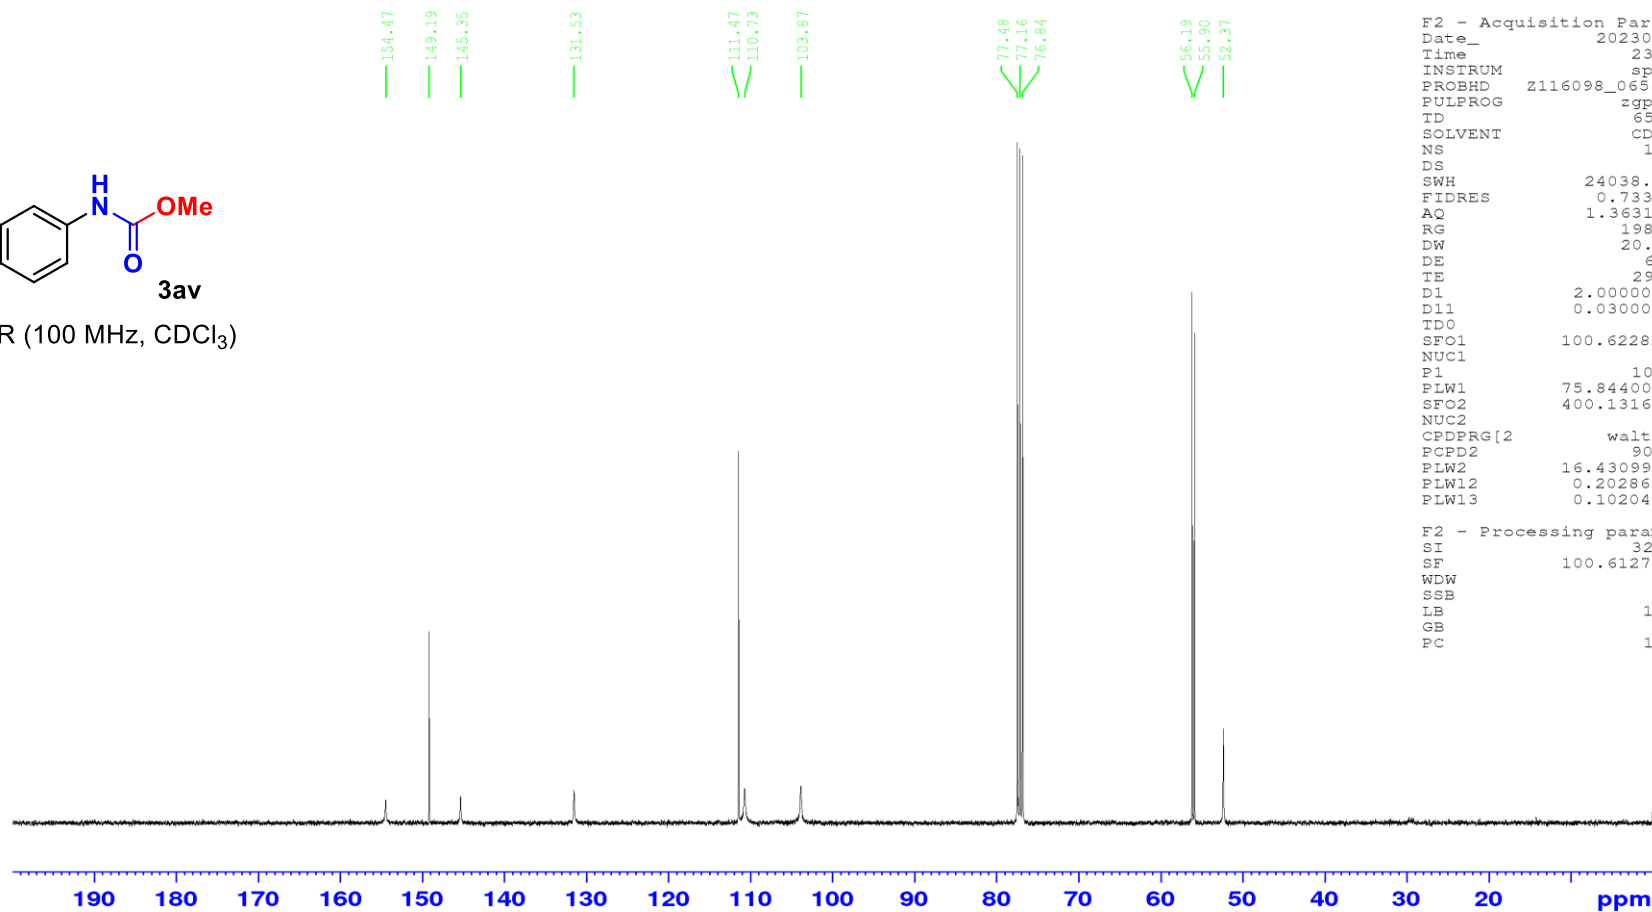

Current Data Parameters  
 NAME lhz-20230418-1  
 EXPNO 2  
 PROCNO 1

F2 - Acquisition Parameters  
 Date\_ 20230418  
 Time 23.30 h  
 INSTRUM spect  
 PROBHD Z116098\_0653 (  
 PULPROG zgpg30  
 TD 65536  
 SOLVENT CDCl3  
 NS 1024  
 DS 4  
 SWH 24038.461 Hz  
 FIDRES 0.733596 Hz  
 AQ 1.3631488 sec  
 RG 198.36  
 DW 20.800 usec  
 DE 6.50 usec  
 TE 292.5 K  
 D1 2.00000000 sec  
 D11 0.03000000 sec  
 TD0 1  
 SFO1 100.6228298 MHz  
 NUC1 13c  
 P1 10.00 usec  
 PLW1 75.84400177 W  
 SFO2 400.1316005 MHz  
 NUC2 1H  
 CPDPRG[2] waltz16  
 PCPD2 90.00 usec  
 PLW2 16.43099976 W  
 PLW12 0.20286000 W  
 PLW13 0.10204000 W

F2 - Processing parameters  
 SI 32768  
 SF 100.6127623 MHz  
 WDW EM  
 SSB 0  
 LB 1.00 Hz  
 GB 0  
 FC 1.40

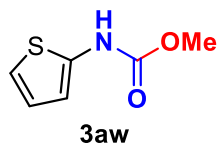

<sup>1</sup>H NMR (400 MHz, CDCl<sub>3</sub>)

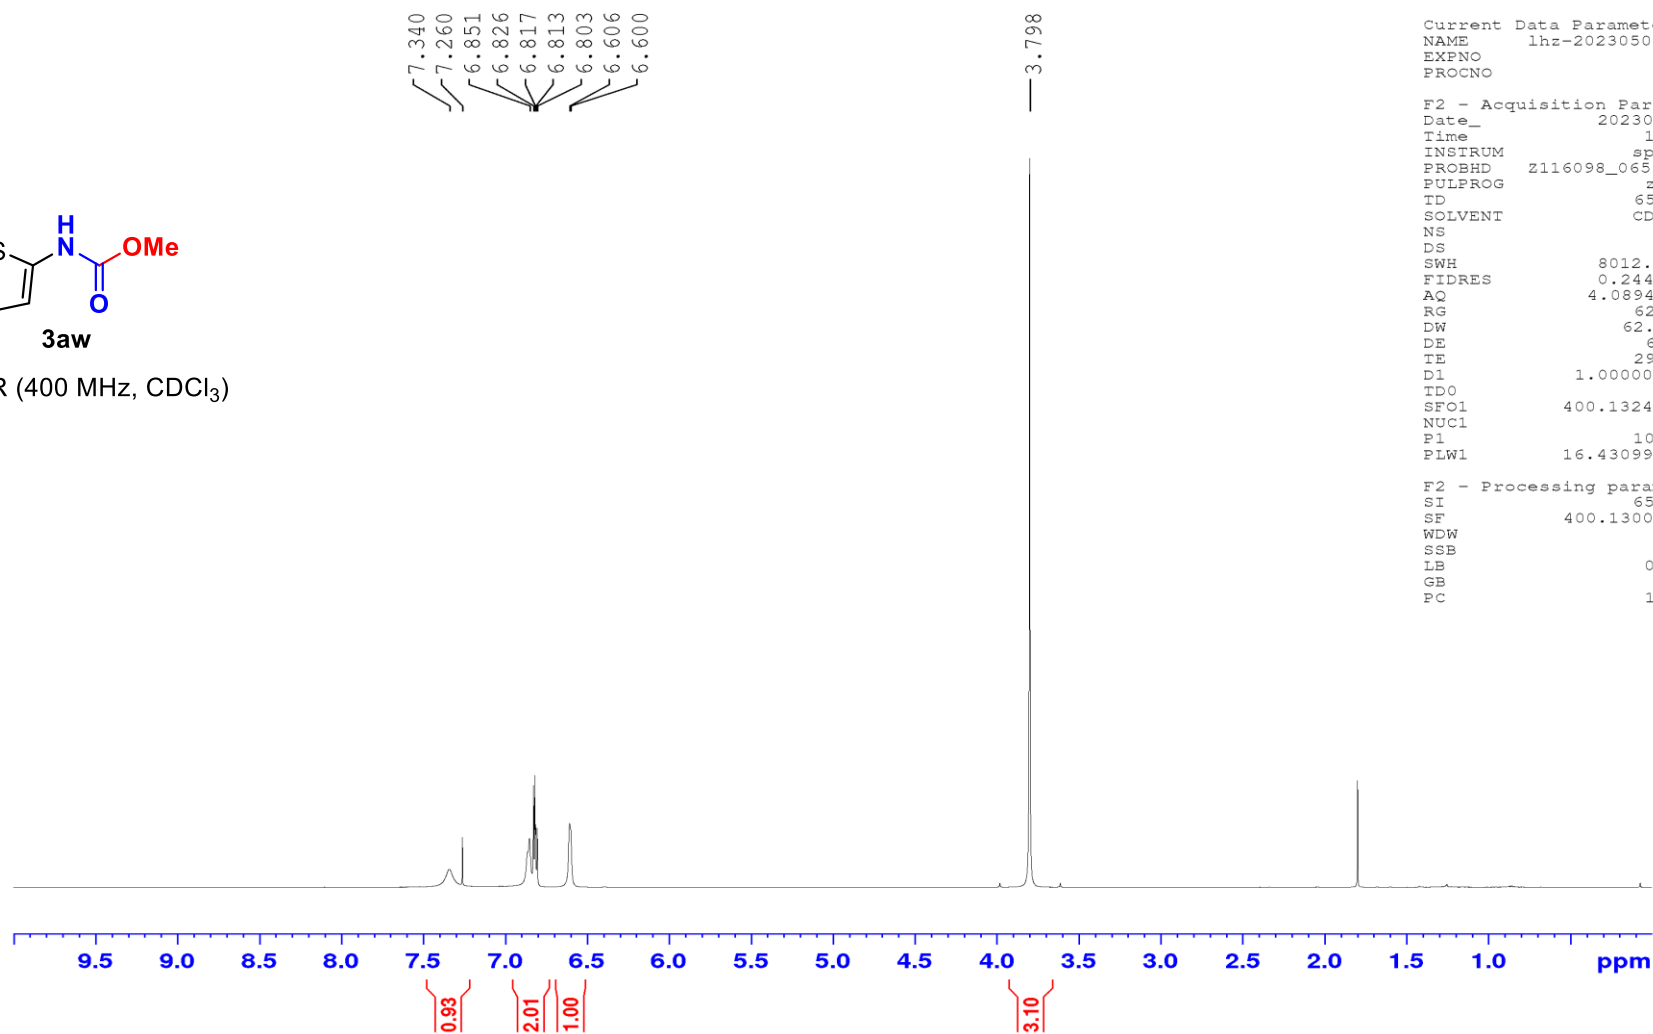

Current Data Parameters  
NAME lhz-20230503-3  
EXPNO 1  
PROCNO 1

F2 - Acquisition Parameters  
Date\_ 20230504  
Time 1.27 h  
INSTRUM spect  
PROBHD Z116098\_0653 (  
PULPROG zg30  
TD 65536  
SOLVENT CDCl3  
NS 16  
DS 2  
SWH 8012.820 Hz  
FIDRES 0.244532 Hz  
AQ 4.0894465 sec  
RG 62.98  
DW 62.400 usec  
DE 6.50 usec  
TE 291.5 K  
D1 1.00000000 sec  
TD0 1  
SFO1 400.1324708 MHz  
NUC1 1H  
P1 10.00 usec  
PLW1 16.43099976 W

F2 - Processing parameters  
SI 65536  
SF 400.1300098 MHz  
WDW EM  
SSB 0  
LB 0.30 Hz  
GB 0  
PC 1.00

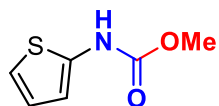

3aw

<sup>13</sup>C NMR (100 MHz, CDCl<sub>3</sub>)

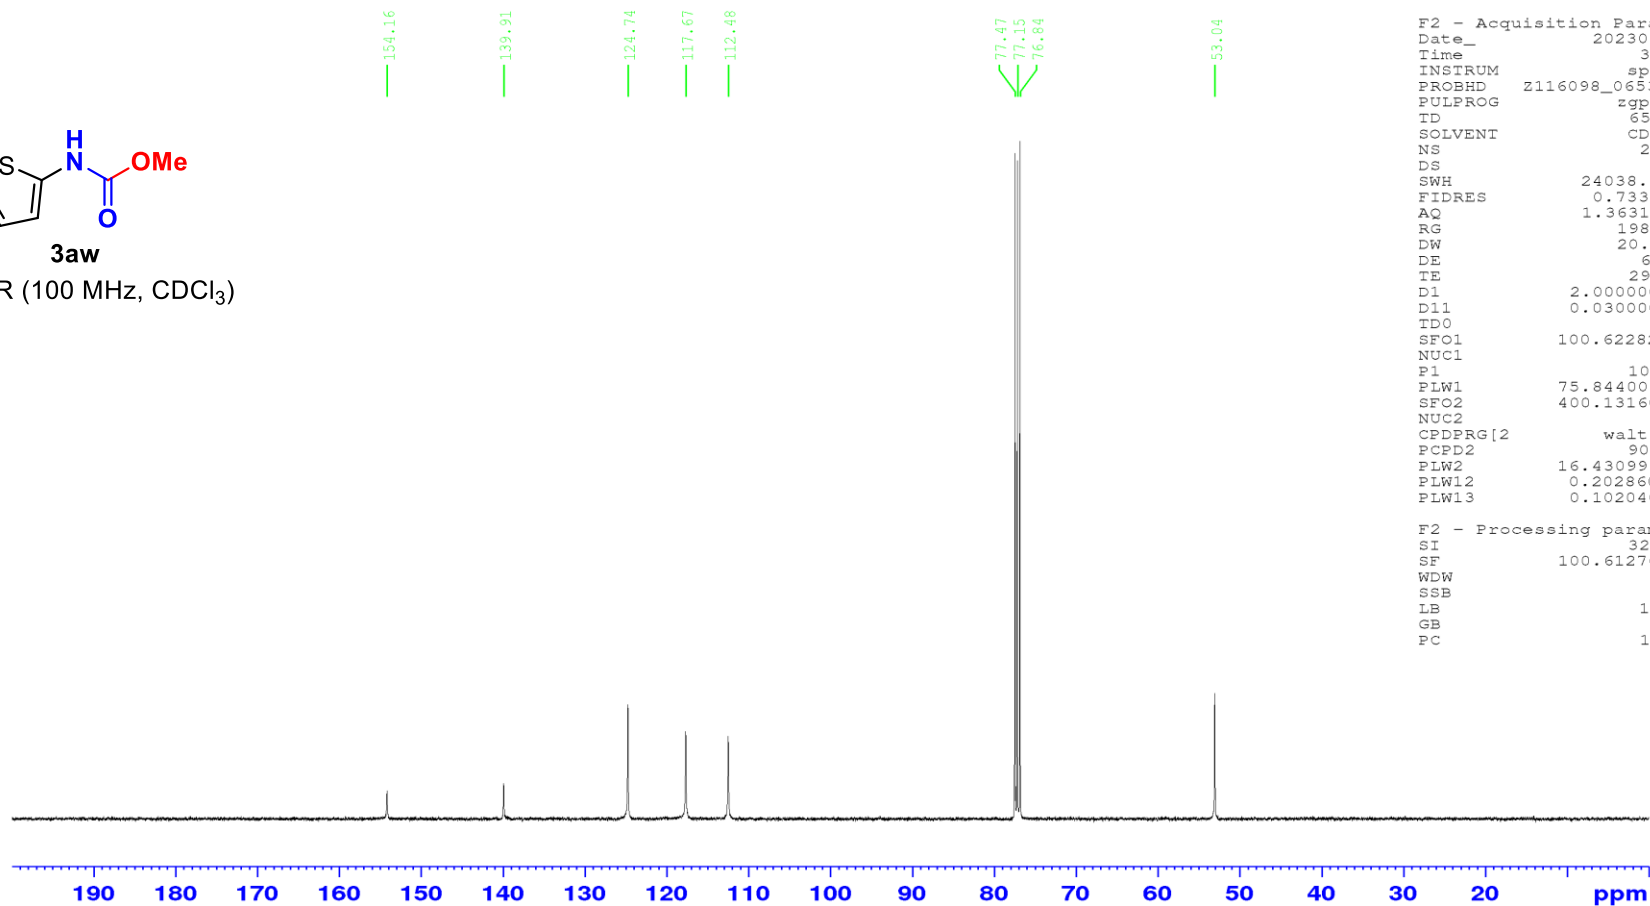

Current Data Parameters  
NAME lhz-20230503-3  
EXPNO 2  
PROCNO 1

F2 - Acquisition Parameters  
Date\_ 20230504  
Time 3.35 h  
INSTRUM spect  
PROBHD Z116098\_0653 (  
PULPROG zgpg30  
TD 65536  
SOLVENT CDCl3  
NS 2222  
DS 4  
SWH 24038.461 Hz  
FIDRES 0.733596 Hz  
AQ 1.3631488 sec  
RG 198.36  
DW 20.800 usec  
DE 6.50 usec  
TE 292.3 K  
D1 2.00000000 sec  
D11 0.03000000 sec  
TD0 1  
SFO1 100.6228298 MHz  
NUC1 13C  
P1 10.00 usec  
PLW1 75.84400177 W  
SFO2 400.1316005 MHz  
NUC2 1H  
CPDPRG[2] waltz16  
PCPD2 90.00 usec  
PLW2 16.43099976 W  
PLW12 0.20286000 W  
PLW13 0.10204000 W

F2 - Processing parameters  
SI 32768  
SF 100.6127623 MHz  
WDW EM  
SSB 0  
LB 1.00 Hz  
GB 0  
PC 1.40

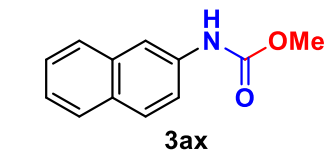

<sup>1</sup>H NMR (400 MHz, CDCl<sub>3</sub>)

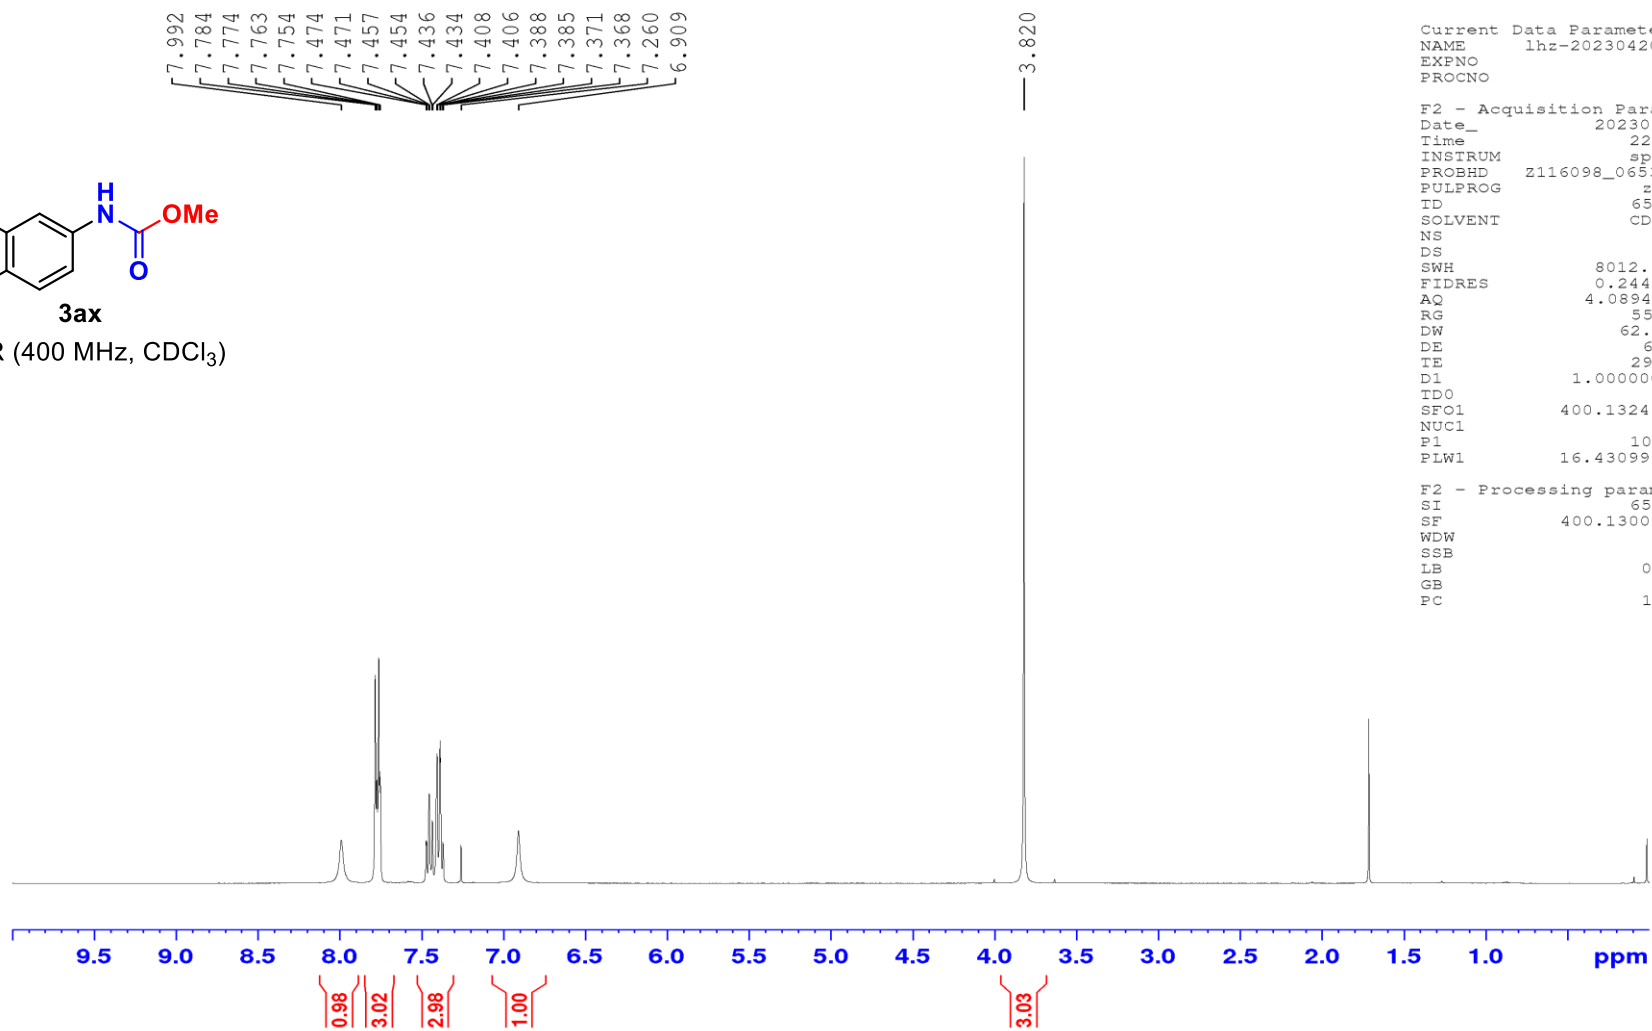

Current Data Parameters  
 NAME lhz-20230420-2  
 EXPNO 4  
 PROCNO 1

F2 - Acquisition Parameters  
 Date\_ 20230420  
 Time 22.21 h  
 INSTRUM spect  
 PROBHD z116098\_0653 (  
 PULPROG zg30  
 TD 65536  
 SOLVENT CDCl3  
 NS 16  
 DS 2  
 SWH 8012.820 Hz  
 FIDRES 0.244532 Hz  
 AQ 4.0894465 sec  
 RG 55.99  
 DW 62.400 usec  
 DE 6.50 usec  
 TE 291.5 K  
 D1 1.00000000 sec  
 TD0 1  
 SFO1 400.1324708 MHz  
 NUC1 1H  
 P1 10.00 usec  
 PLW1 16.43099976 W

F2 - Processing parameters  
 SI 65536  
 SF 400.1300097 MHz  
 WDW EM  
 SSB 0  
 LB 0.30 Hz  
 GB 0  
 FC 1.00

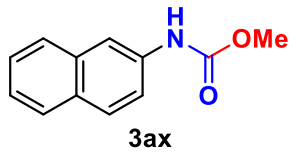

$^{13}\text{C}$  NMR (100 MHz,  $\text{CDCl}_3$ )

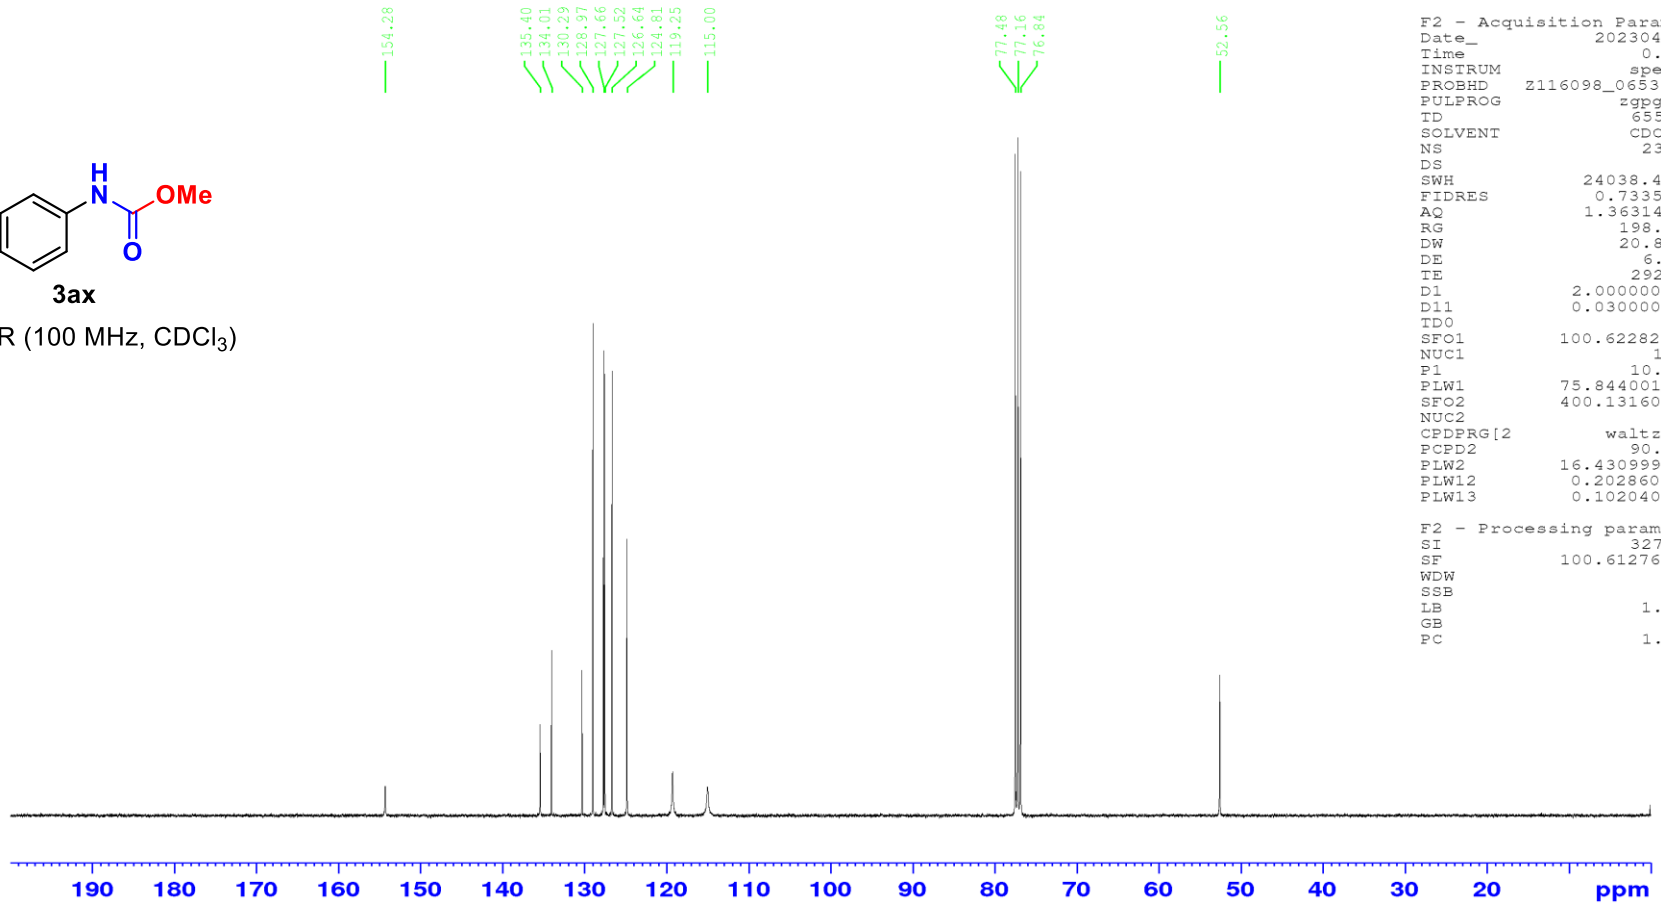

Current Data Parameters  
 NAME lhz-20230420-2  
 EXPNO 3  
 PROCNO 1

F2 - Acquisition Parameters  
 Date\_ 20230421  
 Time 0.35 h  
 INSTRUM spect  
 PROBHD Z116098\_0653 (  
 PULPROG zgpg30  
 TD 65536  
 SOLVENT CDCl3  
 NS 2333  
 DS 4  
 SWH 24038.461 Hz  
 FIDRES 0.733596 Hz  
 AQ 1.3631488 sec  
 RG 198.36  
 DW 20.800 usec  
 DE 6.50 usec  
 TE 292.5 K  
 D1 2.00000000 sec  
 D11 0.03000000 sec  
 TD0 1  
 SFO1 100.6228298 MHz  
 NUC1 13C  
 P1 10.00 usec  
 PLW1 75.84400177 W  
 SFO2 400.1316005 MHz  
 NUC2 1H  
 CPDPRG[2] waltz16  
 FCPD2 90.00 usec  
 PLW2 16.43099976 W  
 PLW12 0.20286000 W  
 PLW13 0.10204000 W

F2 - Processing parameters  
 SI 32768  
 SF 100.6127616 MHz  
 WDW EM  
 SSB 0  
 LB 1.00 Hz  
 GB 0  
 PC 1.40

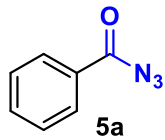

<sup>1</sup>H NMR (400 MHz, CDCl<sub>3</sub>)

8.042  
8.039  
8.021  
8.018  
7.642  
7.639  
7.636  
7.621  
7.605  
7.602  
7.599  
7.480  
7.461  
7.445  
7.441  
7.260

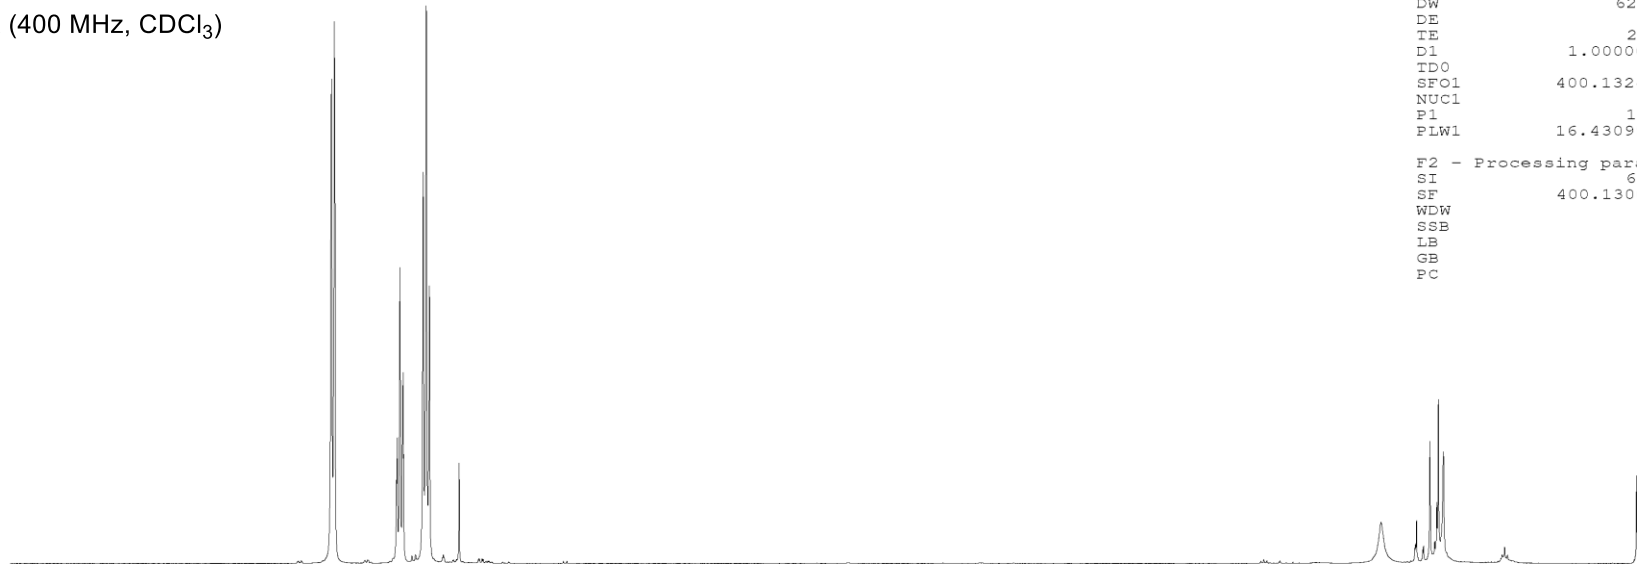

9.5 9.0 8.5 8.0 7.5 7.0 6.5 6.0 5.5 5.0 4.5 4.0 3.5 3.0 2.5 2.0 1.5 1.0 ppm

1.96  
1.00  
1.99

Current Data Parameters  
NAME lhz-20211105-4  
EXPNO 1  
PROCNO 1

F2 - Acquisition Parameters  
Date\_ 20211105  
Time 22.29 h  
INSTRUM spect  
PROBHD Z116098\_0653 (  
PULPROG zg30  
TD 65536  
SOLVENT CDCl3  
NS 8  
DS 2  
SWH 8012.820 Hz  
FIDRES 0.244532 Hz  
AQ 4.0894465 sec  
RG 77.68  
DW 62.400 usec  
DE 6.50 usec  
TE 293.4 K  
D1 1.00000000 sec  
TD0 1  
SFO1 400.1324708 MHz  
NUC1 1H  
P1 10.00 usec  
PLW1 16.43099976 W

F2 - Processing parameters  
SI 65536  
SF 400.1300097 MHz  
WDW EM  
SSB 0  
LB 0.30 Hz  
GB 0  
PC 1.00

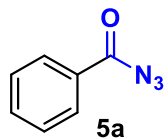

<sup>13</sup>C NMR (100 MHz, CDCl<sub>3</sub>)

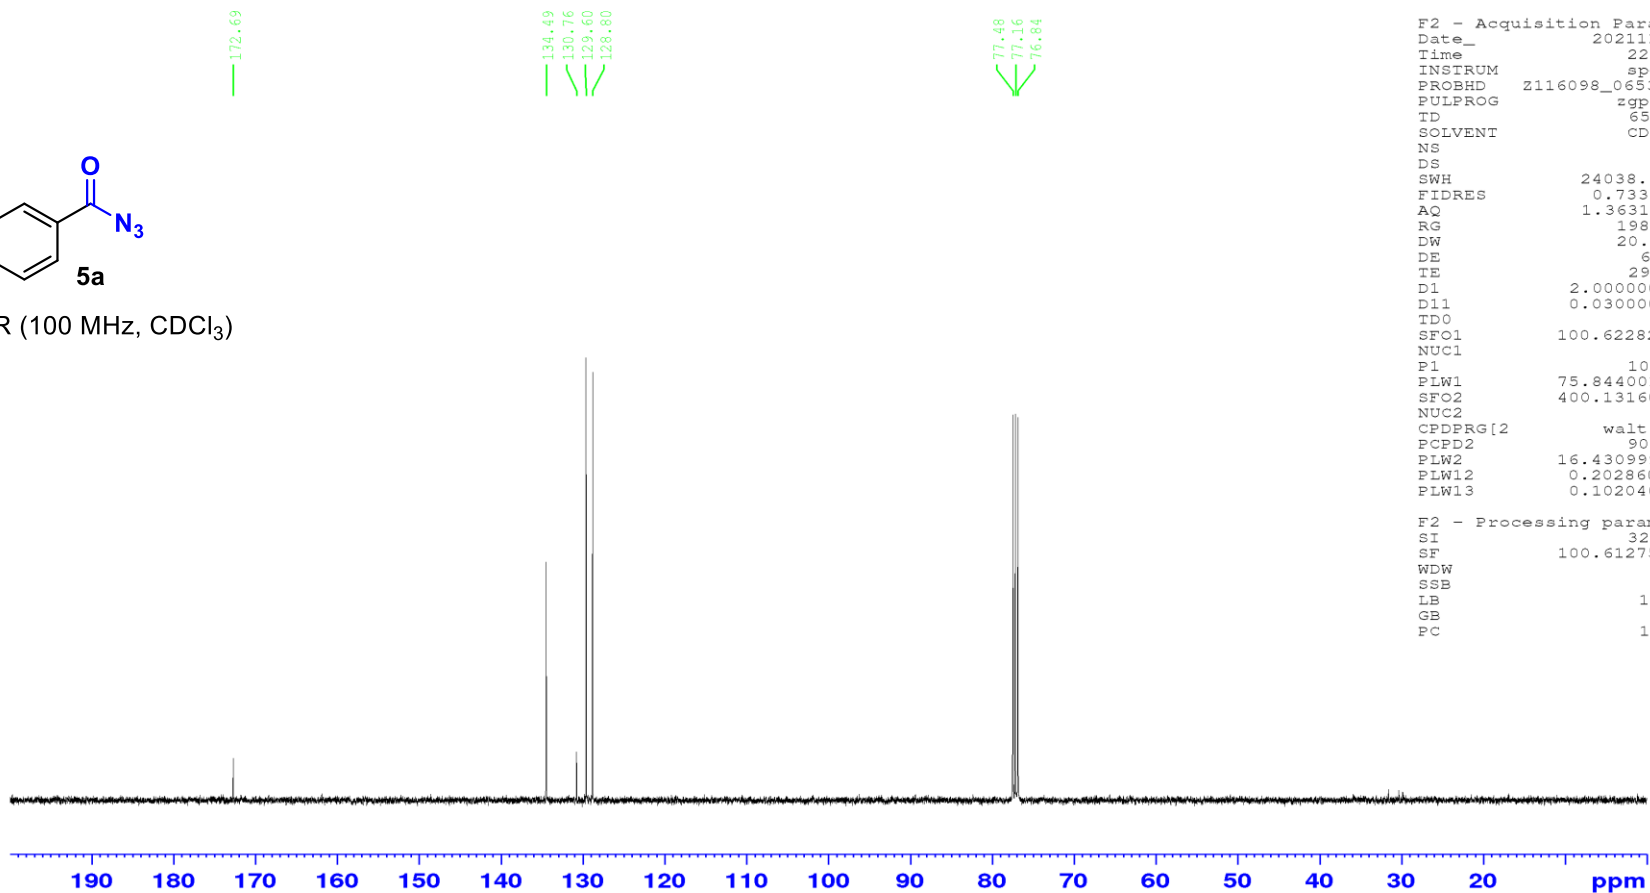

Current Data Parameters  
NAME 1hz-20211105-4  
EXPNO 2  
PROCNO 1

F2 - Acquisition Parameters  
Date\_ 20211105  
Time\_ 22.37 h  
INSTRUM spect  
PROBHD z116098\_0653 (  
PULPROG zgpg30  
TD 65536  
SOLVENT CDCl3  
NS 133  
DS 4  
SWH 24038.461 Hz  
FIDRES 0.733596 Hz  
AQ 1.3631488 sec  
RG 198.36  
DW 20.800 usec  
DE 6.50 usec  
TE 293.9 K  
D1 2.00000000 sec  
D11 0.03000000 sec  
TD0 1  
SFO1 100.6228298 MHz  
NUC1 13C  
P1 10.00 usec  
PLW1 75.84400177 W  
SFO2 400.1316005 MHz  
NUC2 1H  
CPDPRG[2] waltz16  
PCPD2 90.00 usec  
PLW2 16.43099976 W  
PLW12 0.20286000 W  
PLW13 0.10204000 W

F2 - Processing parameters  
SI 32768  
SF 100.6127579 MHz  
WDW EM  
SSB 0  
LB 1.00 Hz  
GB 0  
PC 1.40



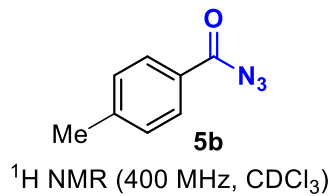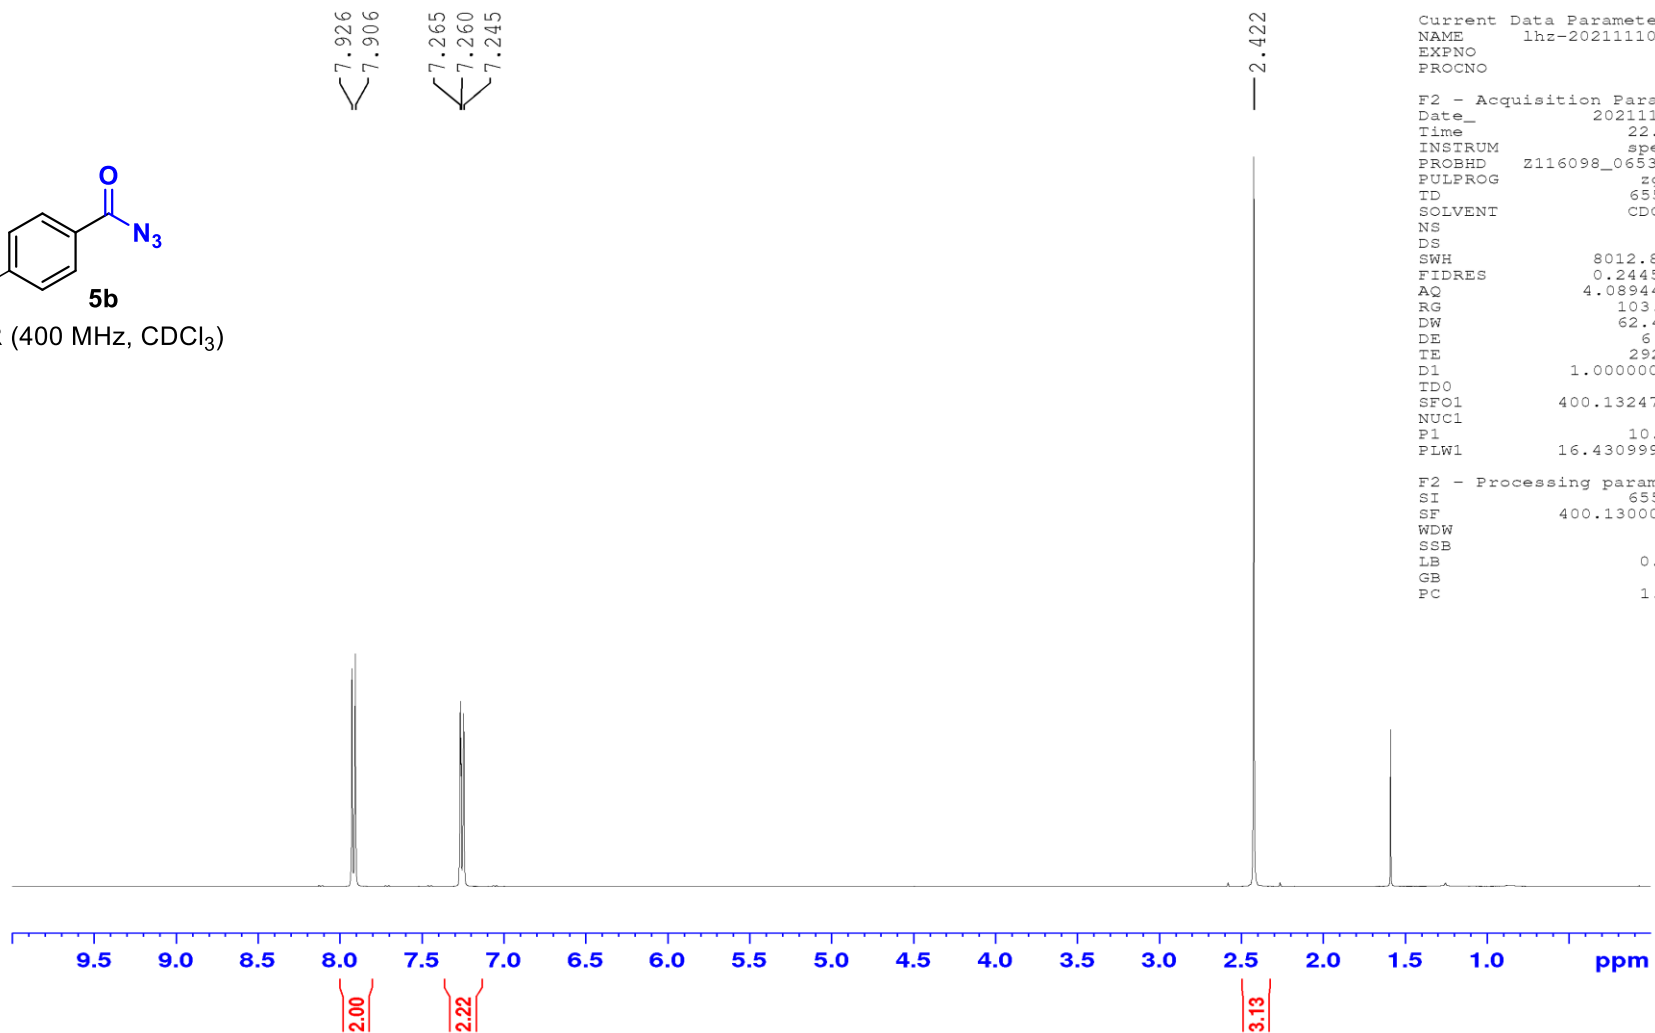

Current Data Parameters  
NAME lhz-20211110-3  
EXPNO 1  
PROCNO 1

F2 - Acquisition Parameters  
Date\_ 20211110  
Time 22.23 h  
INSTRUM spect  
PROBHD Z116098\_0653 (  
PULPROG zg30  
TD 65536  
SOLVENT CDCl3  
NS 8  
DS 2  
SWH 8012.820 Hz  
FIDRES 0.244532 Hz  
AQ 4.0894465 sec  
RG 103.14  
DW 62.400 usec  
DE 6.50 usec  
TE 292.5 K  
D1 1.00000000 sec  
TD0 1  
SFO1 400.1324708 MHz  
NUC1 1H  
P1 10.00 usec  
ELW1 16.43099976 W

F2 - Processing parameters  
SI 65536  
SF 400.1300099 MHz  
WDW EM  
SSB 0  
LB 0.30 Hz  
GB 0  
FC 1.00

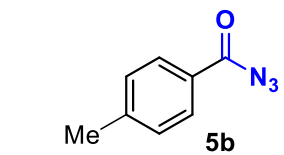

<sup>13</sup>C NMR (100 MHz, CDCl<sub>3</sub>)

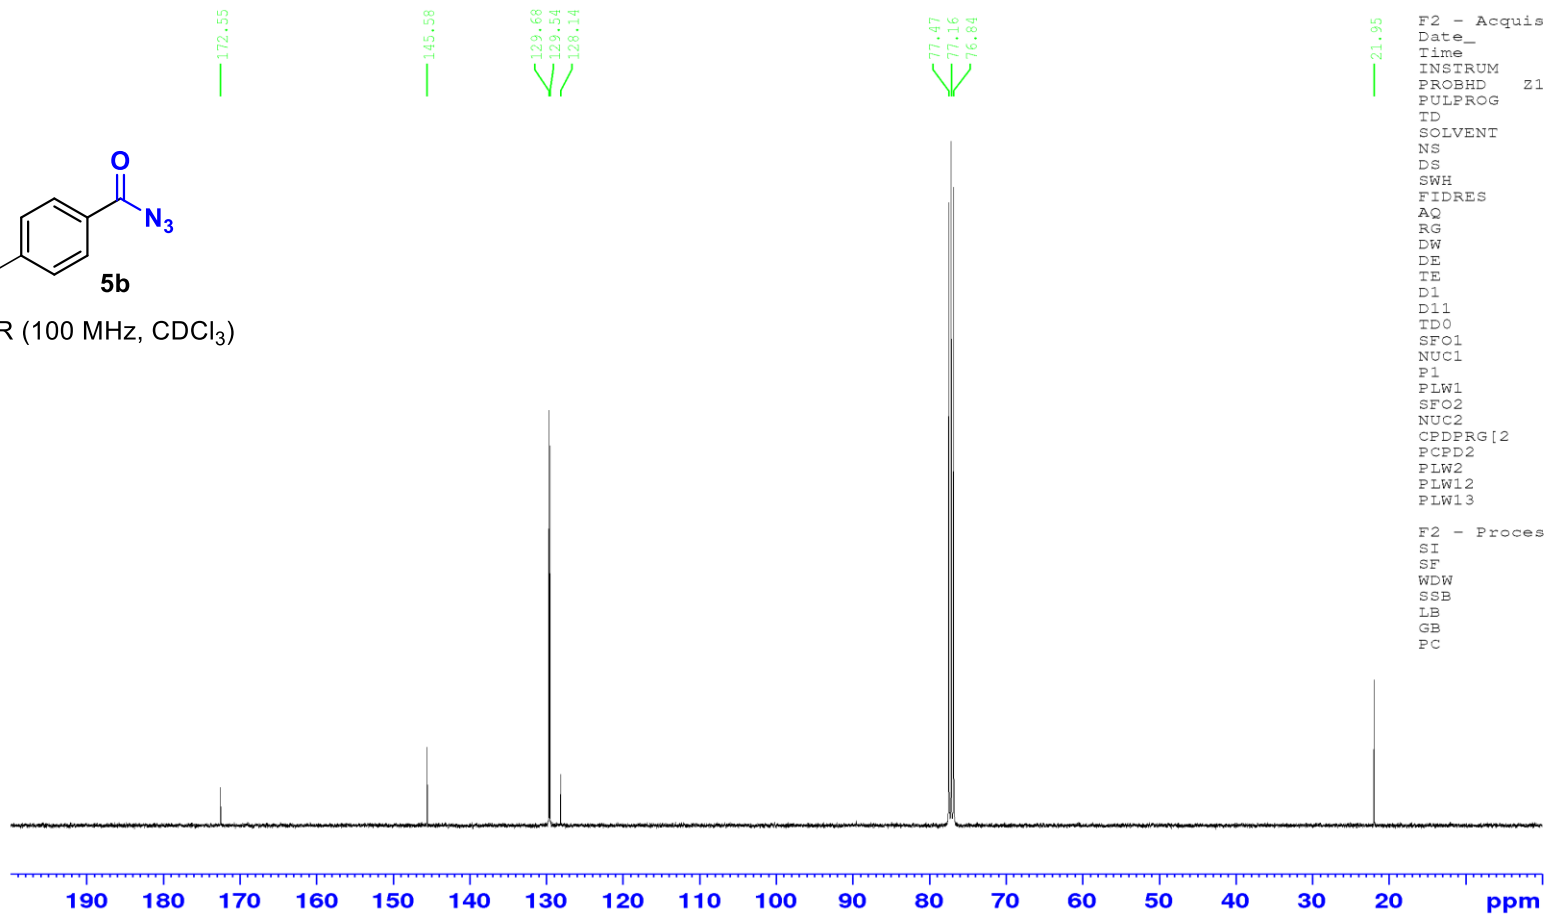

Current Data Parameters  
NAME lhz-20211110-3  
EXPNO 2  
PROCNO 1

F2 - Acquisition Parameters  
Date\_ 20211110  
Time 23.22 h  
INSTRUM spect  
PROBHD Z116098\_0653 (  
PULPROG zgpg30  
TD 65536  
SOLVENT CDCl3  
NS 1024  
DS 4  
SWH 24038.461 Hz  
FIDRES 0.733596 Hz  
AQ 1.3631488 sec  
RG 198.36  
DW 20.800 usec  
DE 6.50 usec  
TE 293.5 K  
D1 2.00000000 sec  
D11 0.03000000 sec  
TD0 1  
SFO1 100.6228298 MHz  
NUC1 13C  
P1 10.00 usec  
PLW1 75.84400177 W  
SFO2 400.1316005 MHz  
NUC2 1H  
CPDPRG[2] waltz16  
PCPD2 90.00 usec  
PLW2 16.43099976 W  
PLW12 0.20286000 W  
PLW13 0.10204000 W

F2 - Processing parameters  
SI 32768  
SF 100.6127571 MHz  
WDW EM  
SSB 0  
LB 1.00 Hz  
GB 0  
FC 1.40

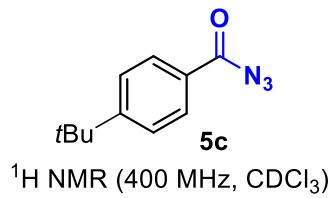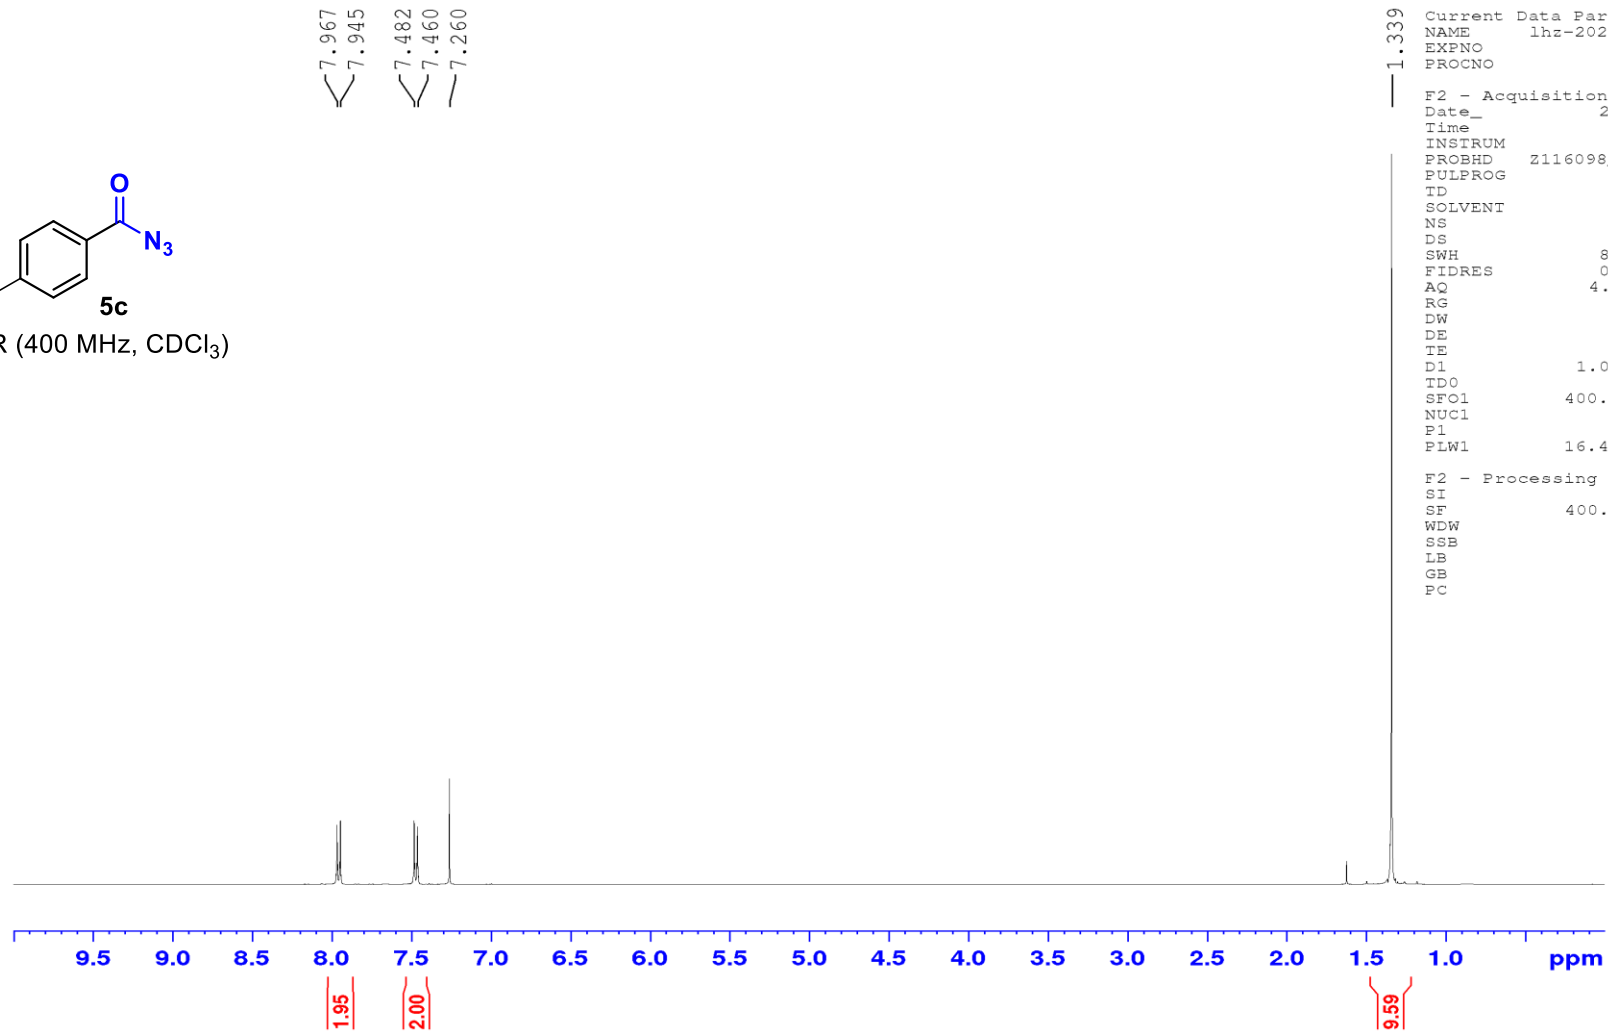

```
Current Data Parameters
NAME      1hz-20220902-5
EXPNO     1
PROCNO    1

F2 - Acquisition Parameters
Date_     20220902
Time      23.00 h
INSTRUM   spect
PROBHD    Z116098_0653 (
PULPROG   zg30
TD         65536
SOLVENT   CDCl3
NS         16
DS         2
SWH       8012.820 Hz
FIDRES    0.244532 Hz
AQ         4.0894465 sec
RG         50.3
DW         62.400 usec
DE         6.50 usec
TE         294.6 K
D1         1.00000000 sec
TD0        1
SFO1      400.1324708 MHz
NUC1       1H
P1         10.00 usec
PLW1      16.43099976 W

F2 - Processing parameters
SI         65536
SF         400.1300098 MHz
WDW        EM
SSB        0
LB         0.30 Hz
GB         0
PC         1.00
```

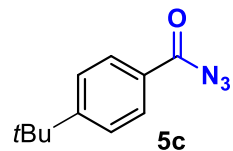

<sup>13</sup>C NMR (100 MHz, CDCl<sub>3</sub>)

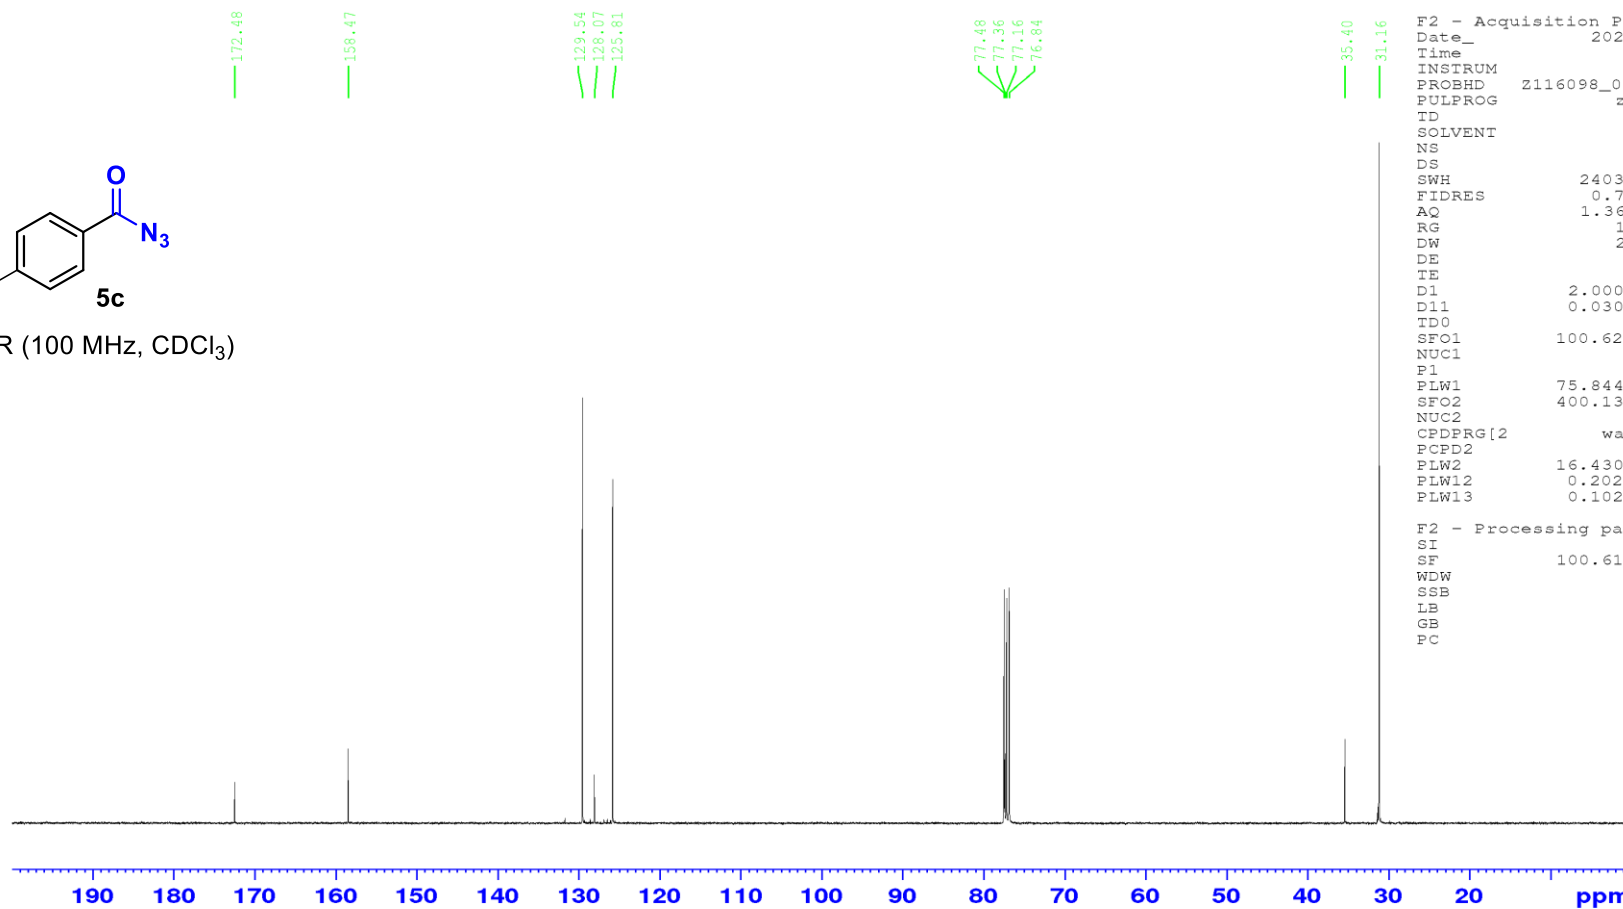

Current Data Parameters  
NAME lhz-20220902-5  
EXPNO 2  
PROCNO 1

F2 - Acquisition Parameters  
Date\_ 20220902  
Time 23.59 h  
INSTRUM spect  
PROBHD Z116098\_0653 (  
PULPROG zgpg30  
TD 65536  
SOLVENT CDCl3  
NS 1024  
DS 4  
SWH 24038.461 Hz  
FIDRES 0.733596 Hz  
AQ 1.3631488 sec  
RG 198.36  
DW 20.800 usec  
DE 6.50 usec  
TE 294.9 K  
D1 2.00000000 sec  
D11 0.03000000 sec  
TD0 1  
SFO1 100.6228298 MHz  
NUC1 13C  
E1 10.00 usec  
PLW1 75.84400177 W  
SFO2 400.1316005 MHz  
NUC2 1H  
CPDPRG[2] waltz16  
PCPD2 90.00 usec  
PLW2 16.43099976 W  
PLW12 0.20286000 W  
PLW13 0.10204000 W

F2 - Processing parameters  
SI 32768  
SF 100.6127573 MHz  
WDW EM  
SSB 0  
LB 1.00 Hz  
GB 0  
FC 1.40

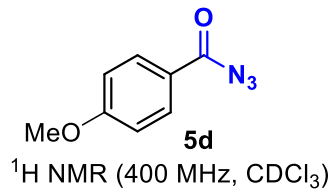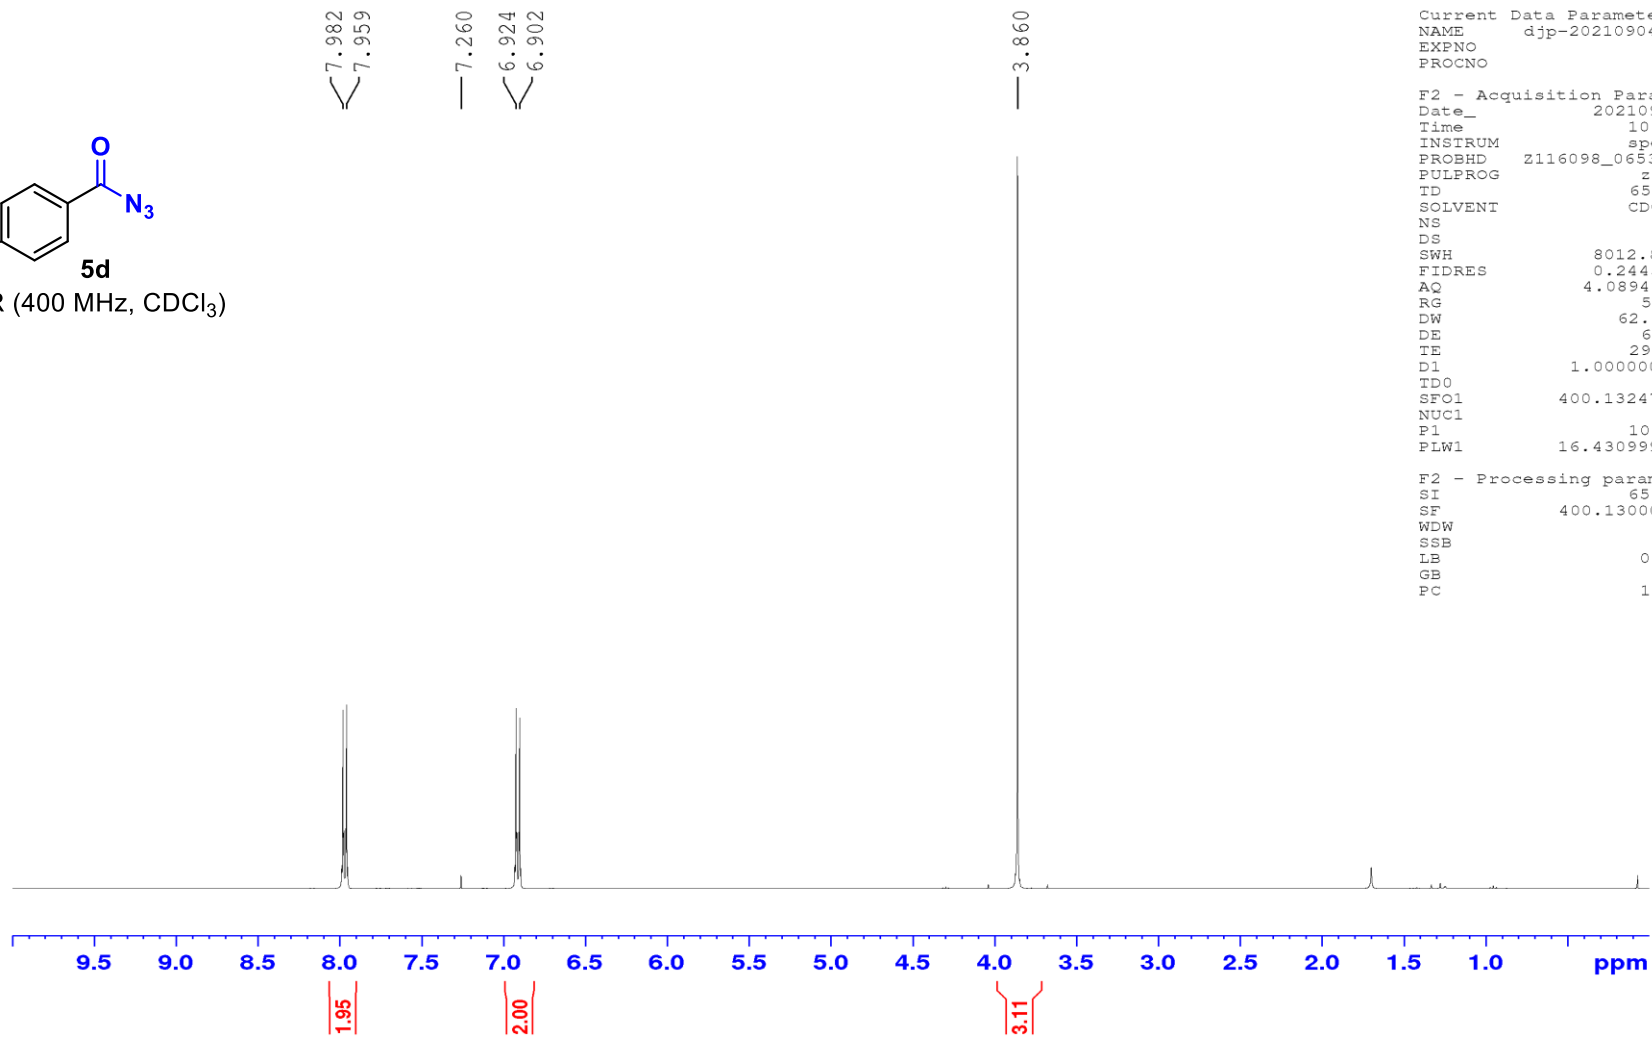

Current Data Parameters  
NAME djp-20210904-3  
EXPNO 1  
PROCNO 1

F2 - Acquisition Parameters  
Date\_ 20210904  
Time 10.43 h  
INSTRUM spect  
PROBHD z116098\_0653 (  
PULPROG zg30  
TD 65536  
SOLVENT CDCl3  
NS 8  
DS 2  
SWH 8012.820 Hz  
FIDRES 0.244532 Hz  
AQ 4.0894465 sec  
RG 50.3  
DW 62.400 usec  
DE 6.50 usec  
TE 296.1 K  
D1 1.00000000 sec  
TD0 1  
SFO1 400.1324708 MHz  
NUC1 1H  
P1 10.00 usec  
PLW1 16.43099976 W

F2 - Processing parameters  
SI 65536  
SF 400.1300096 MHz  
WDW EM  
SSB 0  
LB 0.30 Hz  
GB 0  
PC 1.00

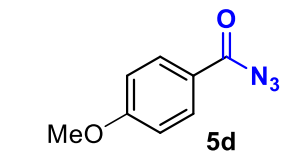

<sup>13</sup>C NMR (100 MHz, CDCl<sub>3</sub>)

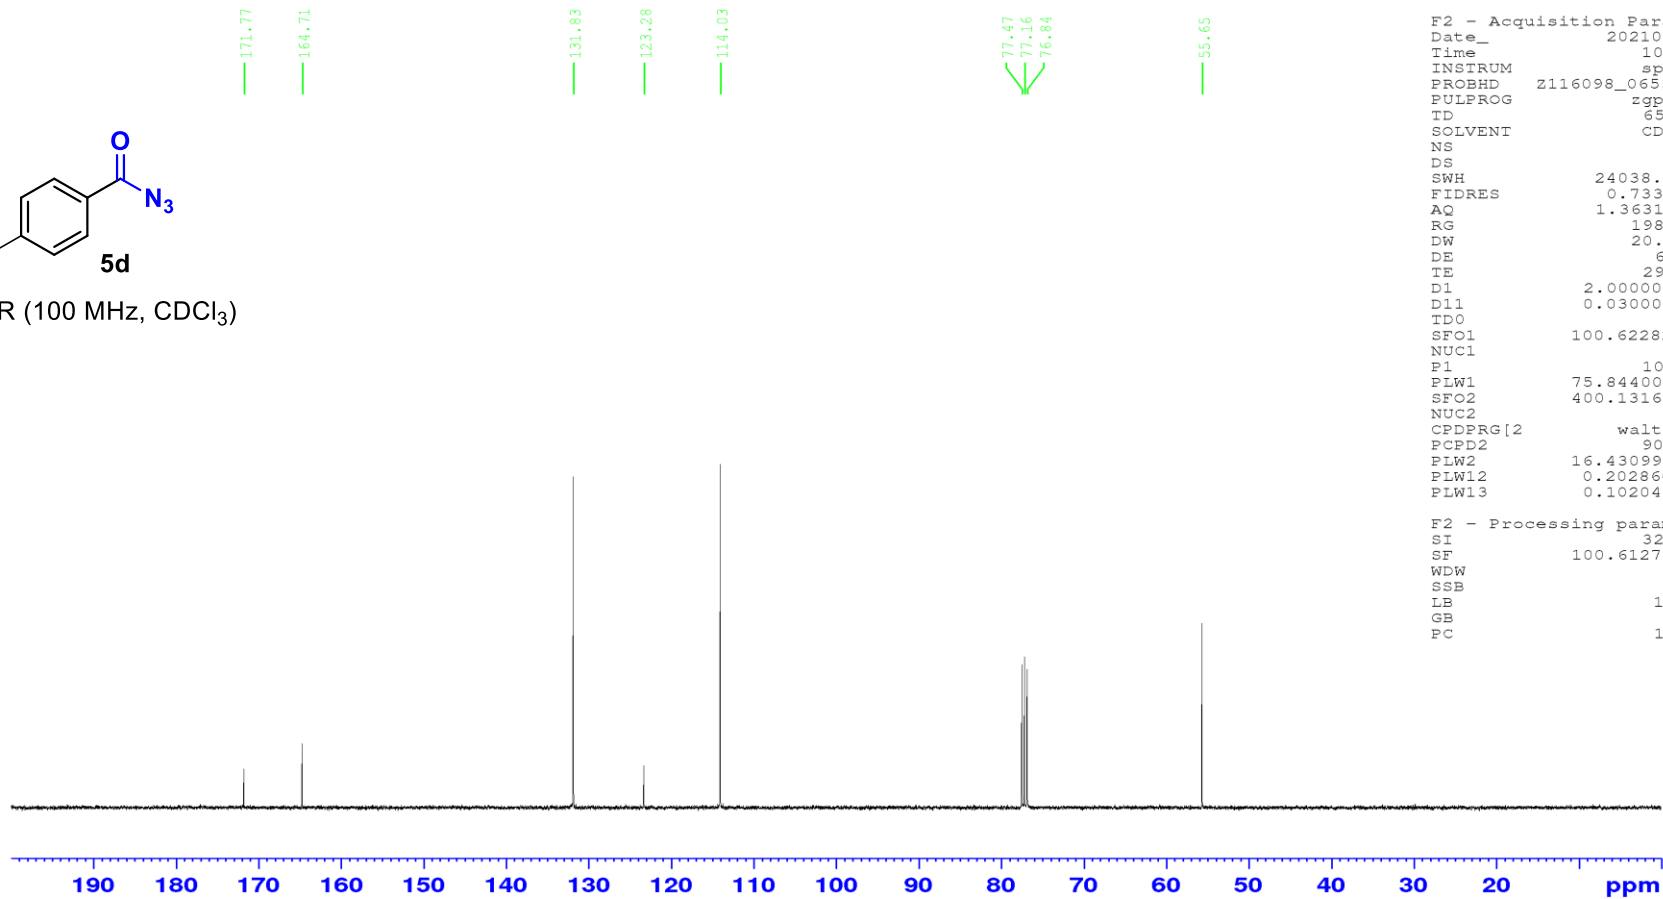

Current Data Parameters  
 NAME djp-20210904-3  
 EXPNO 2  
 PROCNO 1

F2 - Acquisition Parameters  
 Date\_ 20210904  
 Time 10.48 h  
 INSTRUM spect  
 PROBHD z116098\_0653 (  
 PULPROG zgpg30  
 TD 65536  
 SOLVENT CDCl3  
 NS 68  
 DS 4  
 SWH 24038.461 Hz  
 FIDRES 0.733596 Hz  
 AQ 1.3631488 sec  
 RG 198.36  
 DW 20.800 usec  
 DE 6.50 usec  
 TE 296.2 K  
 D1 2.00000000 sec  
 D11 0.03000000 sec  
 TDO 1  
 SFO1 100.6228298 MHz  
 NUC1 13C  
 P1 10.00 usec  
 PLW1 75.84400177 W  
 SFO2 400.1316005 MHz  
 NUC2 1H  
 CPDPRG[2] waltz16  
 PCPD2 90.00 usec  
 PLW2 16.43099976 W  
 PLW12 0.20286000 W  
 PLW13 0.10204000 W

F2 - Processing parameters  
 SI 32768  
 SF 100.6127594 MHz  
 WDW EM  
 SSB 0  
 LB 1.00 Hz  
 GB 0  
 PC 1.40

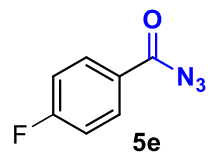

<sup>1</sup>H NMR (400 MHz, CDCl<sub>3</sub>)

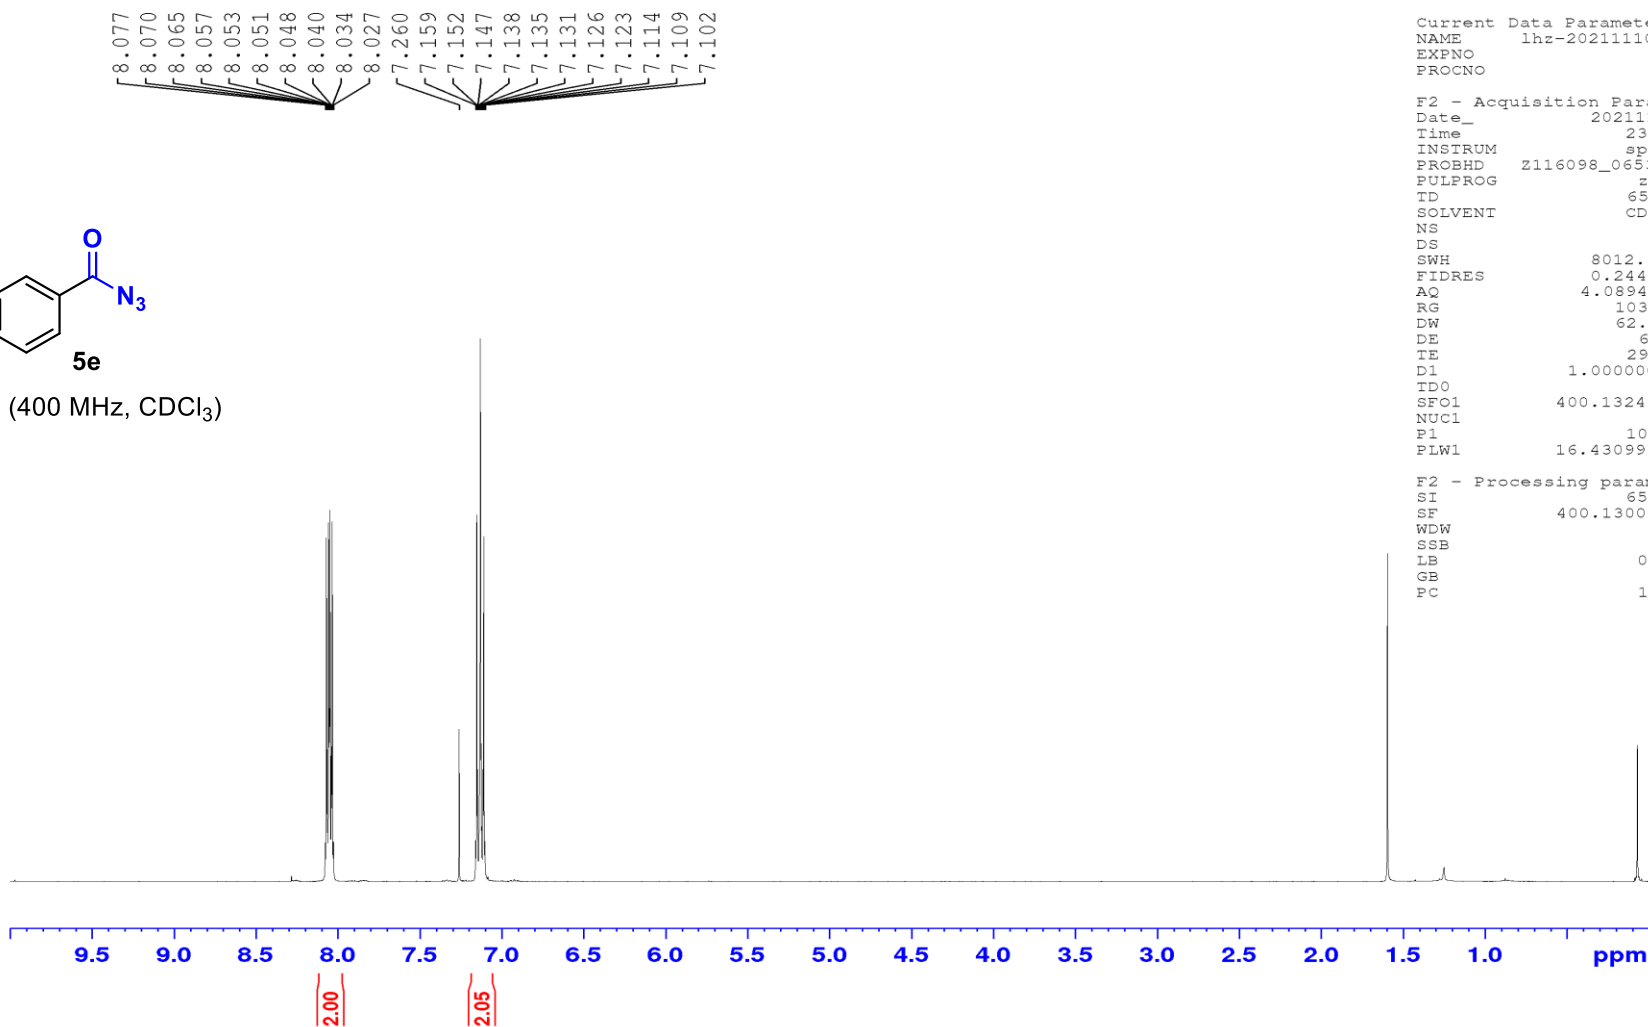

Current Data Parameters  
 NAME lhz-20211110-4  
 EXPNO 1  
 PROCNO 1

F2 - Acquisition Parameters  
 Date\_ 20211110  
 Time 23.26 h  
 INSTRUM spect  
 PROBHD Z116098\_0653 (  
 PULPROG zg30  
 TD 65536  
 SOLVENT CDCl3  
 NS 8  
 DS 2  
 SWH 8012.820 Hz  
 FIDRES 0.244532 Hz  
 AQ 4.0894465 sec  
 RG 103.14  
 DW 62.400 usec  
 DE 6.50 usec  
 TE 292.9 K  
 D1 1.00000000 sec  
 TD0 1  
 SFO1 400.1324708 MHz  
 NUC1 1H  
 P1 10.00 usec  
 PLW1 16.43099976 W

F2 - Processing parameters  
 SI 65536  
 SF 400.1300098 MHz  
 WDW EM  
 SSB 0  
 LB 0.30 Hz  
 GB 0  
 FC 1.00

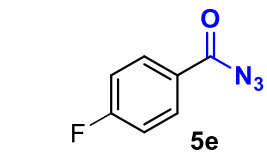

<sup>13</sup>C NMR (100 MHz, CDCl<sub>3</sub>)

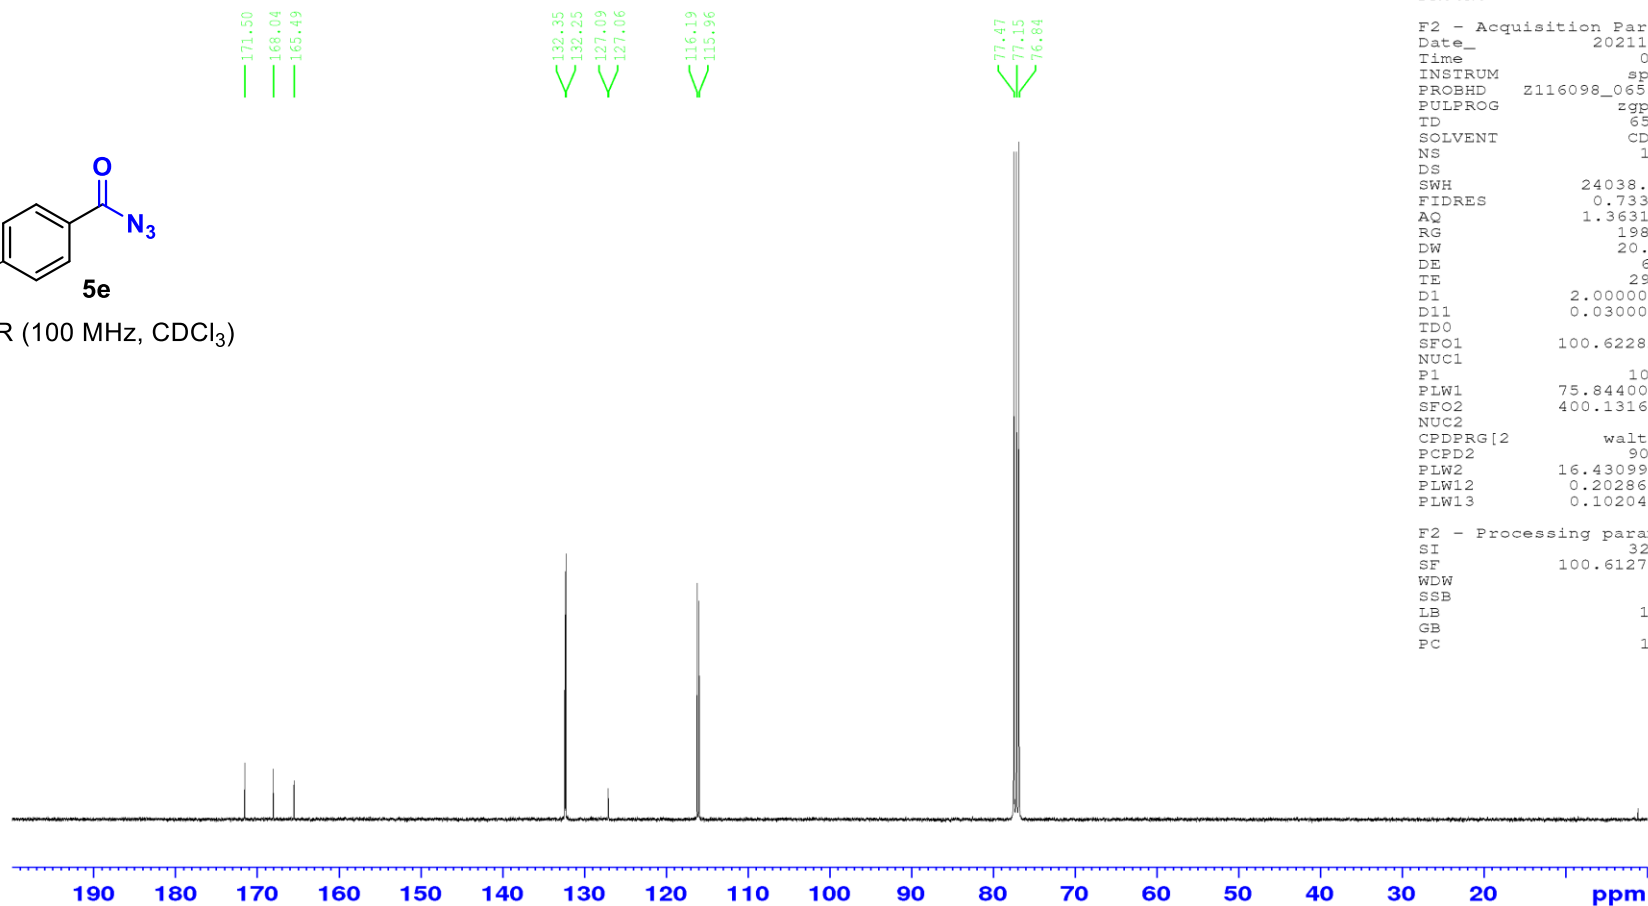

Current Data Parameters  
 NAME lhz-20211110-4  
 EXPNO 2  
 PROCNO 1

F2 - Acquisition Parameters  
 Date\_ 20211111  
 Time 0.43 h  
 INSTRUM spect  
 PROBHD z116098\_0653 ( )  
 PULPROG zgpg30  
 TD 65536  
 SOLVENT CDCl3  
 NS 1333  
 DS 4  
 SWH 24038.461 Hz  
 FIDRES 0.733596 Hz  
 AQ 1.3631488 sec  
 RG 198.36  
 DW 20.800 usec  
 DE 6.50 usec  
 TE 293.5 K  
 D1 2.00000000 sec  
 D11 0.03000000 sec  
 TD0 1  
 SFO1 100.6228298 MHz  
 NUC1 13C  
 P1 10.00 usec  
 PLW1 75.84400177 W  
 SFO2 400.1316005 MHz  
 NUC2 1H  
 CPDPRG[2] waltz16  
 PCPD2 90.00 usec  
 PLW2 16.43099976 W  
 PLW12 0.20286000 W  
 PLW13 0.10204000 W

F2 - Processing parameters  
 SI 32768  
 SF 100.6127571 MHz  
 WDW EM  
 SSB 0  
 LB 1.00 Hz  
 GB 0  
 FC 1.40



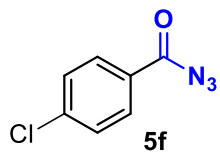

<sup>1</sup>H NMR (400 MHz, CDCl<sub>3</sub>)

7.961  
7.939  
7.433  
7.411  
7.260

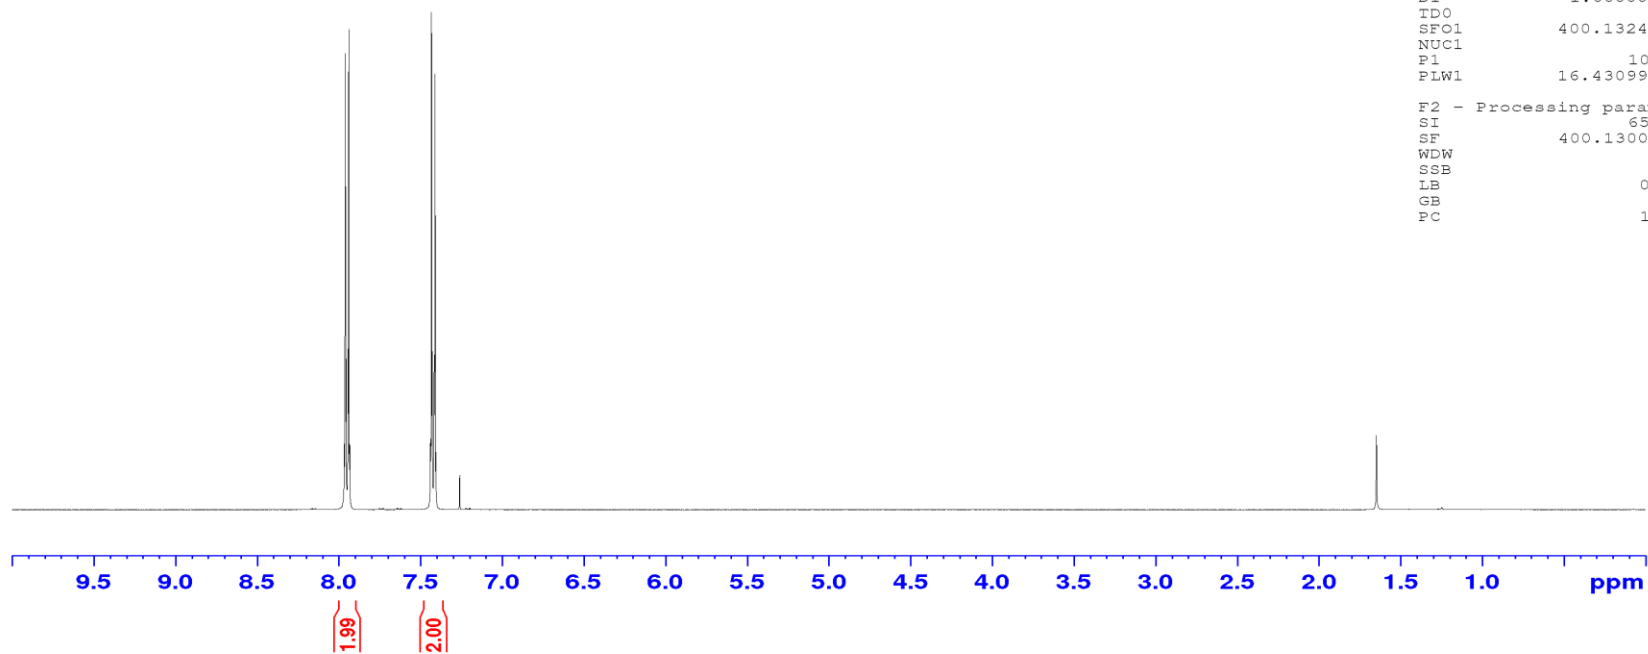

Current Data Parameters  
NAME djp-20210904-2  
EXPNO 1  
PROCNO 1

F2 - Acquisition Parameters  
Date\_ 20210904  
Time 10.33 h  
INSTRUM spect  
PROBHD Z116098\_0653 (   
PULPROG zg30  
TD 65536  
SOLVENT CDCl3  
NS 8  
DS 2  
SWH 8012.820 Hz  
FIDRES 0.244532 Hz  
AQ 4.0894465 sec  
RG 70.89  
DW 62.400 usec  
DE 6.50 usec  
TE 296.0 K  
D1 1.00000000 sec  
TD0 1  
SFO1 400.1324708 MHz  
NUC1 1H  
P1 10.00 usec  
PLW1 16.43099976 W

F2 - Processing parameters  
SI 65536  
SF 400.1300096 MHz  
WDW EM  
SSB 0  
LB 0.30 Hz  
GB 0  
FC 1.00

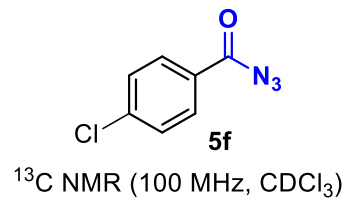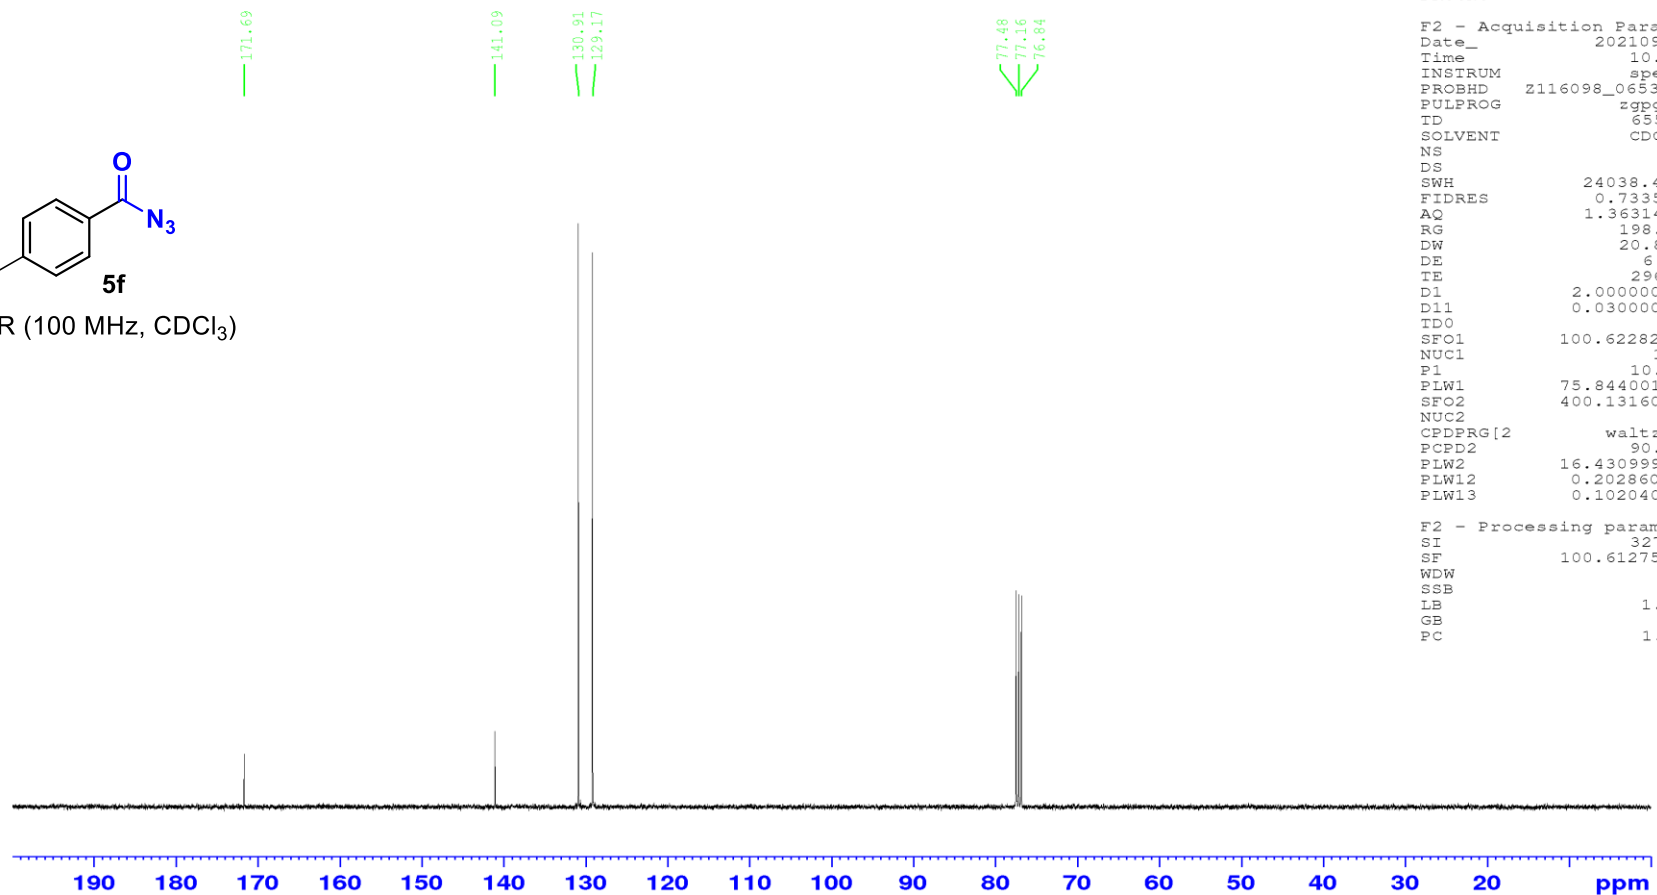

Current Data Parameters  
NAME djp-20210904-2  
EXPNO 2  
PROCNO 1

F2 - Acquisition Parameters  
Date\_ 20210904  
Time 10.39 h  
INSTRUM spect  
PROBHD zll16098\_0653 ( )  
PULPROG zgpg30  
TD 65536  
SOLVENT CDCl3  
NS 90  
DS 4  
SWH 24038.461 Hz  
FIDRES 0.733596 Hz  
AQ 1.3631488 sec  
RG 198.36  
DW 20.800 usec  
DE 6.50 usec  
TE 296.2 K  
D1 2.00000000 sec  
D11 0.03000000 sec  
TD0 1  
SFO1 100.6228298 MHz  
NUC1 13C  
P1 10.00 usec  
PLW1 75.84400177 W  
SFO2 400.1316005 MHz  
NUC2 1H  
CPDPRG2 waltz16  
PCPD2 90.00 usec  
PLW2 16.43099976 W  
PLW12 0.20286000 W  
PLW13 0.10204000 W

F2 - Processing parameters  
SI 32768  
SF 100.6127579 MHz  
WDW EM  
SSB 0  
LB 1.00 Hz  
GB 0  
PC 1.40

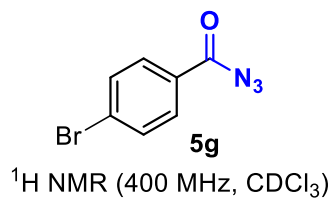

7.892  
7.871  
7.611  
7.590  
7.260

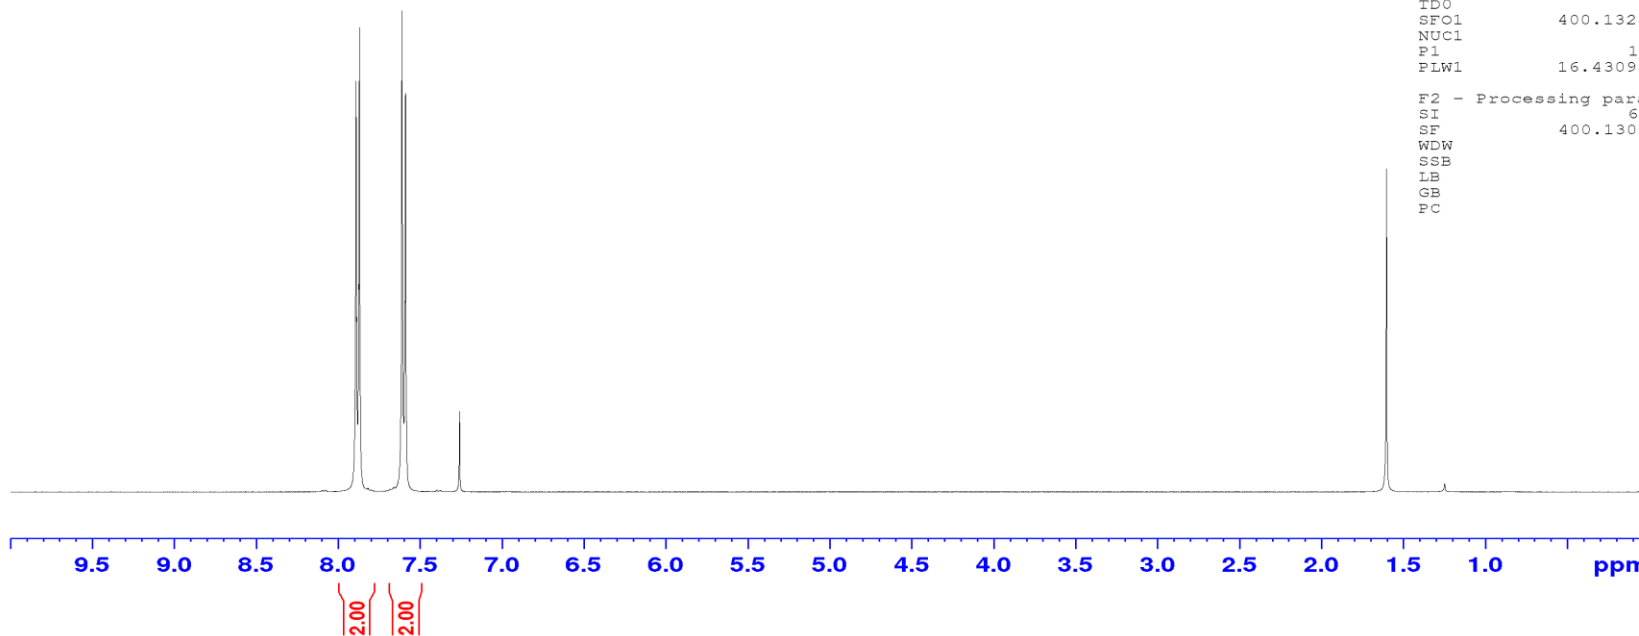

Current Data Parameters  
NAME 1hz-20211106-1  
EXPNO 1  
PROCNO 1

F2 - Acquisition Parameters  
Date\_ 20211106  
Time 22.36 h  
INSTRUM spect  
PROBHD Z116098\_0653 (  
PULPROG zg30  
TD 65536  
SOLVENT CDCl3  
NS 8  
DS 2  
SWH 8012.820 Hz  
FIDRES 0.244532 Hz  
AQ 4.0894465 sec  
RG 112.15  
DW 62.400 usec  
DE 6.50 usec  
TE 293.0 K  
D1 1.00000000 sec  
TD0 1  
SFO1 400.1324708 MHz  
NUC1 1H  
P1 10.00 usec  
PLW1 16.43099976 W

F2 - Processing parameters  
SI 65536  
SF 400.1300098 MHz  
WDW EM  
SSB 0  
LB 0.30 Hz  
GB 0  
FC 1.00

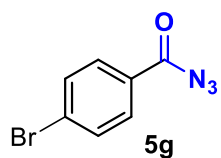

<sup>13</sup>C NMR (100 MHz, CDCl<sub>3</sub>)

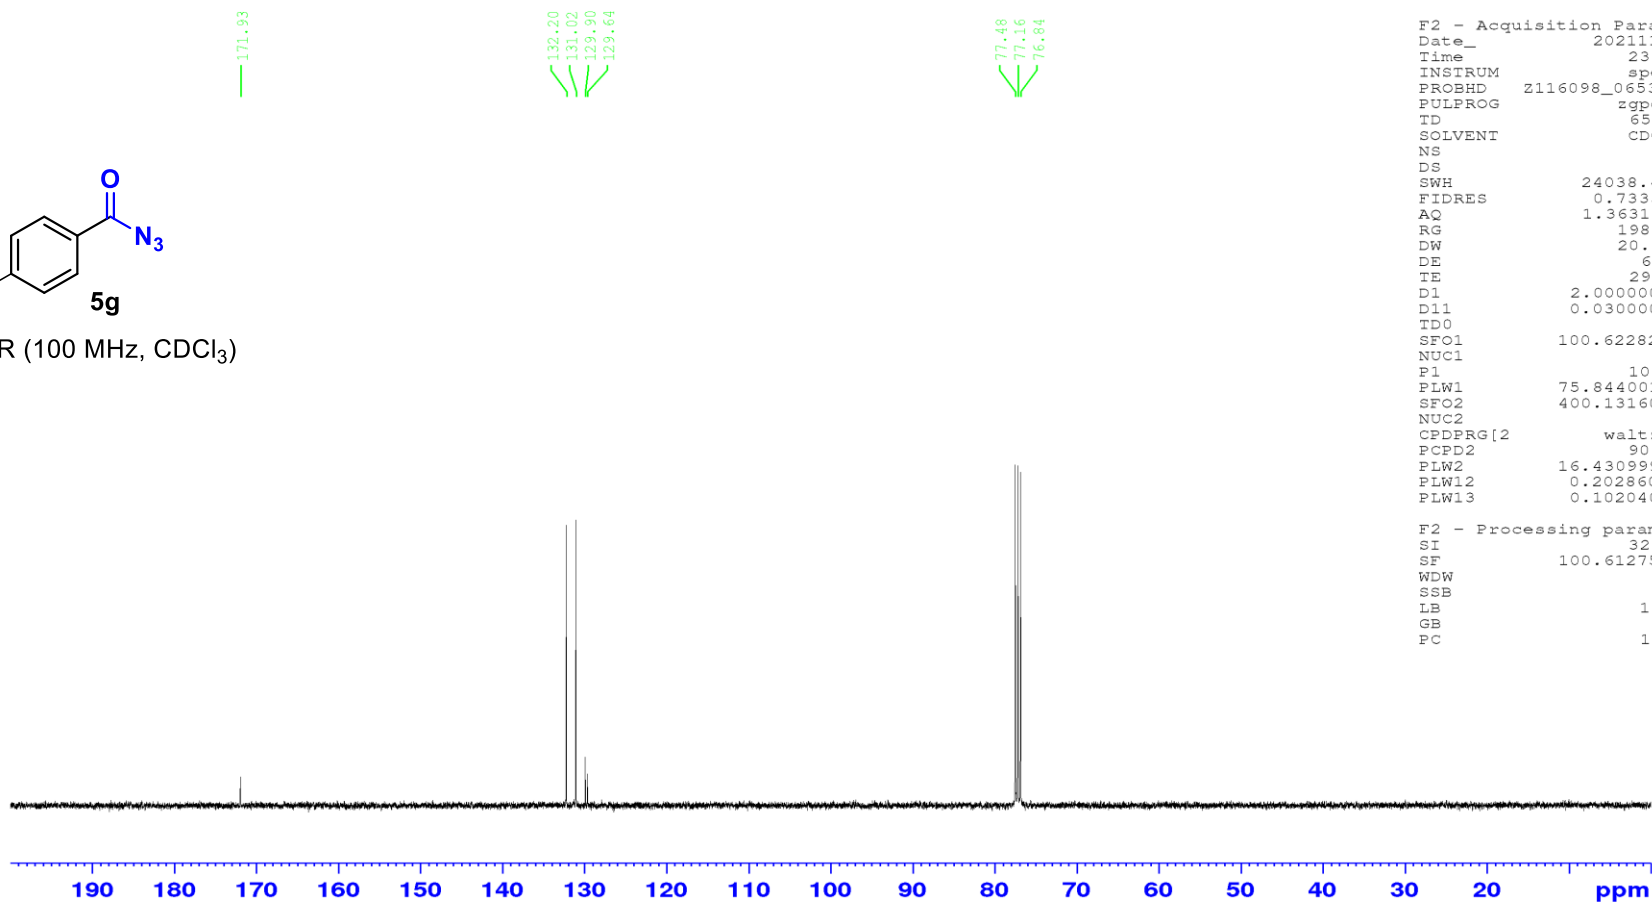

Current Data Parameters  
NAME lhz-20211106-1  
EXPNO 2  
PROCNO 1

F2 - Acquisition Parameters  
Date\_ 20211106  
Time 23.15 h  
INSTRUM spect  
PROBHD z116098\_0653 (  
PULPROG zgpg30  
TD 65536  
SOLVENT CDCl3  
NS 133  
DS 4  
SWH 24038.461 Hz  
FIDRES 0.733596 Hz  
AQ 1.3631488 sec  
RG 198.36  
DW 20.800 usec  
DE 6.50 usec  
TE 294.1 K  
D1 2.00000000 sec  
D11 0.03000000 sec  
TD0 1  
SFO1 100.6228298 MHz  
NUC1 13C  
P1 10.00 usec  
PLW1 75.84400177 W  
SFO2 400.1316005 MHz  
NUC2 1H  
CPDPRG[2] waltz16  
PCPD2 90.00 usec  
PLW2 16.43099976 W  
PLW12 0.20286000 W  
PLW13 0.10204000 W

F2 - Processing parameters  
SI 32768  
SF 100.6127572 MHz  
WDW EM  
SSB 0  
LB 1.00 Hz  
GB 0  
FC 1.40

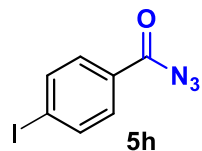

<sup>1</sup>H NMR (400 MHz, CDCl<sub>3</sub>)

7.832  
7.811  
7.727  
7.705  
— 7.260

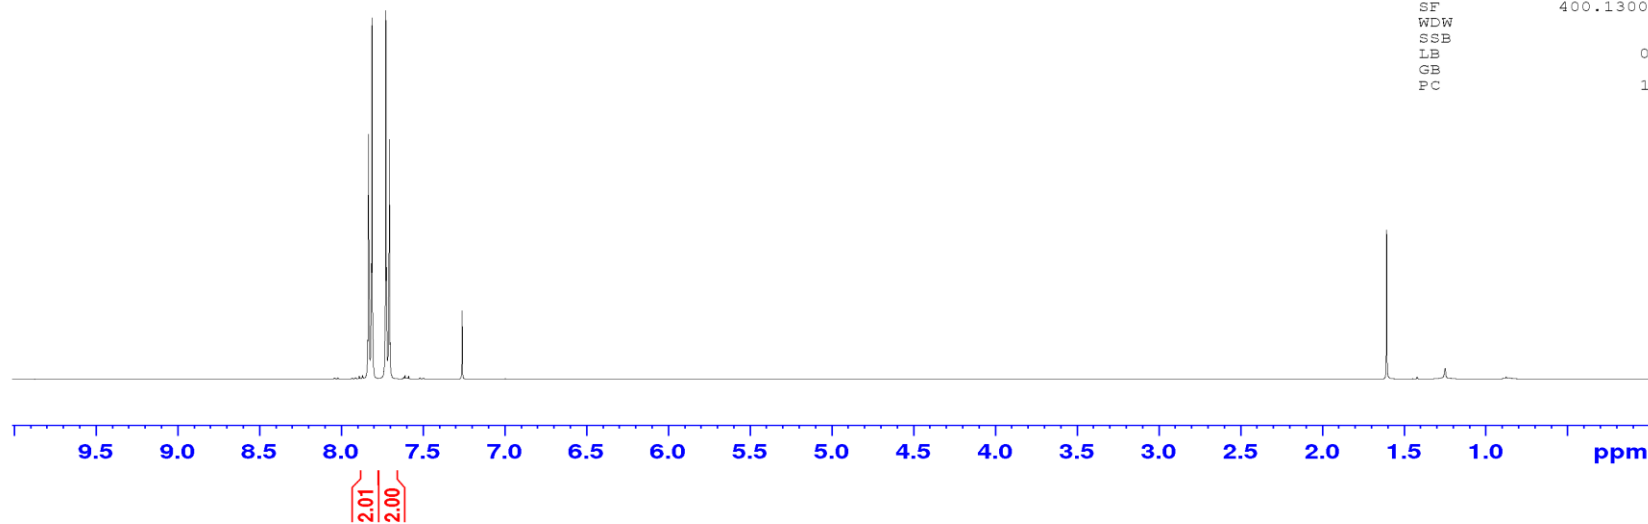

Current Data Parameters  
NAME 1hz-202201005-1  
EXPNO 1  
PROCNO 1

F2 - Acquisition Parameters  
Date\_ 20221005  
Time 21.28 h  
INSTRUM spect  
PROBHD Z116098\_0653 (  
PULPROG zg30  
TD 65536  
SOLVENT CDCl3  
NS 16  
DS 2  
SWH 8012.820 Hz  
FIDRES 0.244532 Hz  
AQ 4.0894465 sec  
RG 103.14  
DW 62.400 usec  
DE 6.50 usec  
TE 293.4 K  
D1 1.00000000 sec  
TD0 1  
SFO1 400.1324708 MHz  
NUC1 1H  
P1 10.00 usec  
PLW1 16.43099976 W

F2 - Processing parameters  
SI 65536  
SF 400.1300099 MHz  
WDW EM  
SSB 0  
LB 0.30 Hz  
GB 0  
FC 1.00

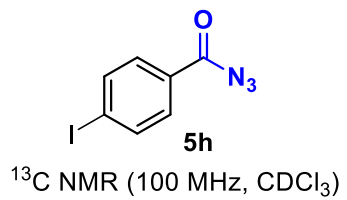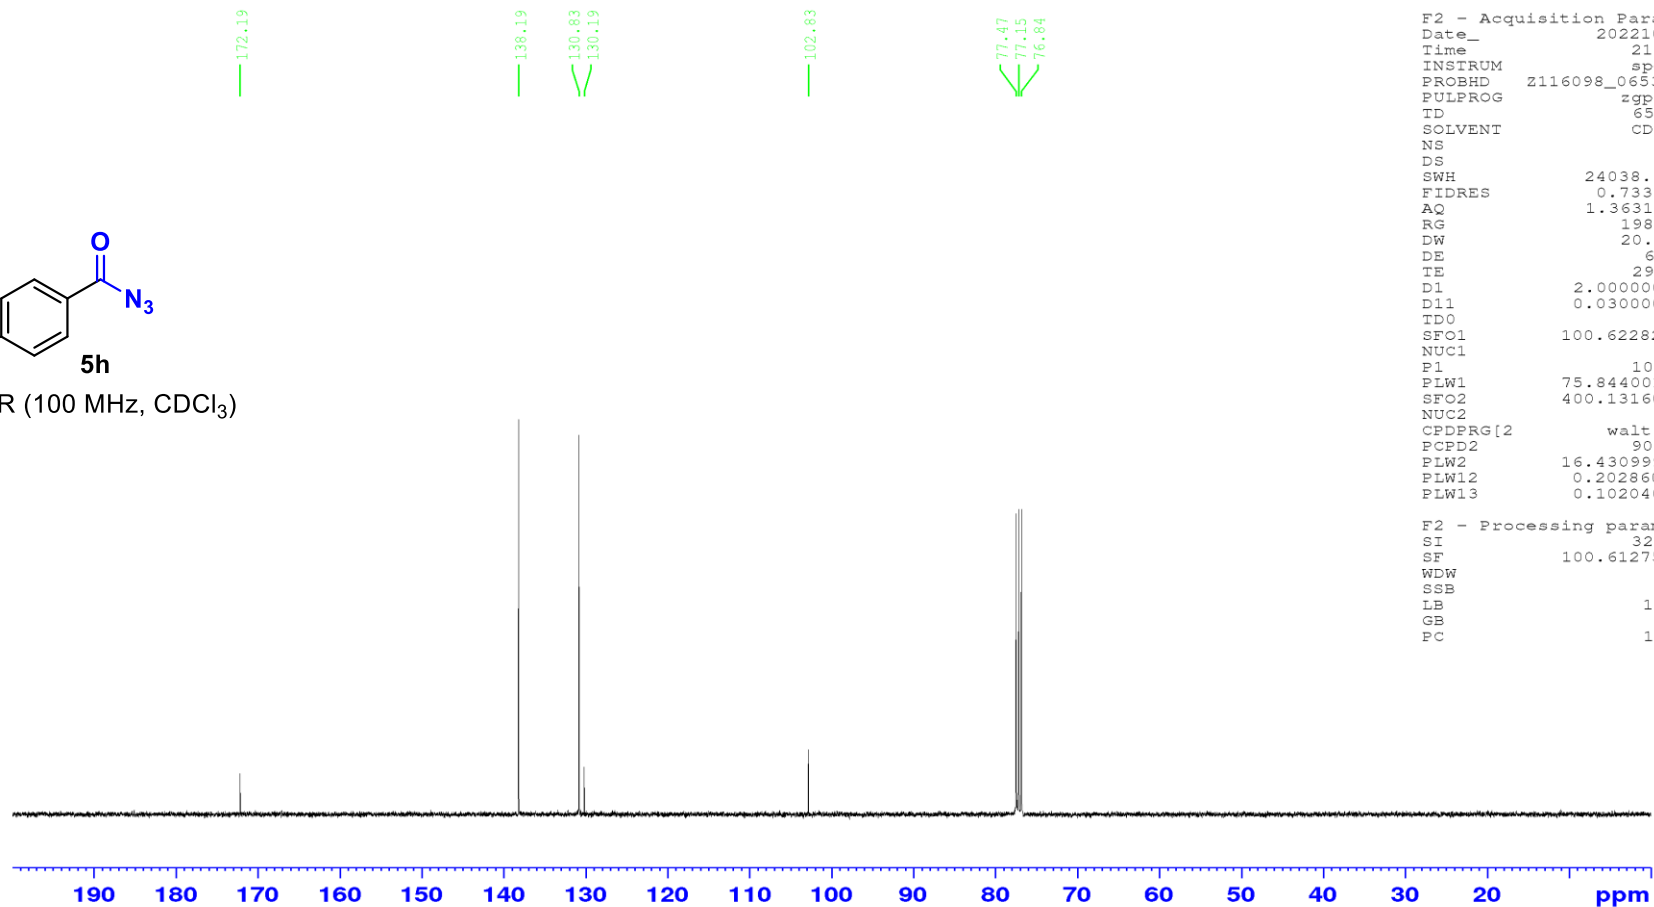

Current Data Parameters  
 NAME lhz-202201005-1  
 EXPNO 2  
 PROCNO 1

F2 - Acquisition Parameters  
 Date\_ 20221005  
 Time 21.40 h  
 INSTRUM spect  
 PROBHD Z116098\_0653 (  
 PULPROG zgpg30  
 TD 65536  
 SOLVENT CDCl3  
 NS 188  
 DS 4  
 SWH 24038.461 Hz  
 FIDRES 0.733596 Hz  
 AQ 1.3631488 sec  
 RG 198.36  
 DW 20.800 usec  
 DE 6.50 usec  
 TE 293.7 K  
 D1 2.00000000 sec  
 D11 0.03000000 sec  
 TD0 1  
 SFO1 100.6228298 MHz  
 NUC1 13C  
 P1 10.00 usec  
 PLW1 75.84400177 W  
 SFO2 400.1316005 MHz  
 NUC2 1H  
 CPDPRG[2] waltz16  
 PCPD2 90.00 usec  
 PLW2 16.43099976 W  
 PLW12 0.20286000 W  
 PLW13 0.10204000 W

F2 - Processing parameters  
 SI 32768  
 SF 100.6127586 MHz  
 WDW EM  
 SSB 0  
 LB 1.00 Hz  
 GB 0  
 FC 1.40

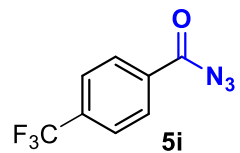

<sup>1</sup>H NMR (400 MHz, CDCl<sub>3</sub>)

8.154  
8.133  
7.736  
7.715  
7.260

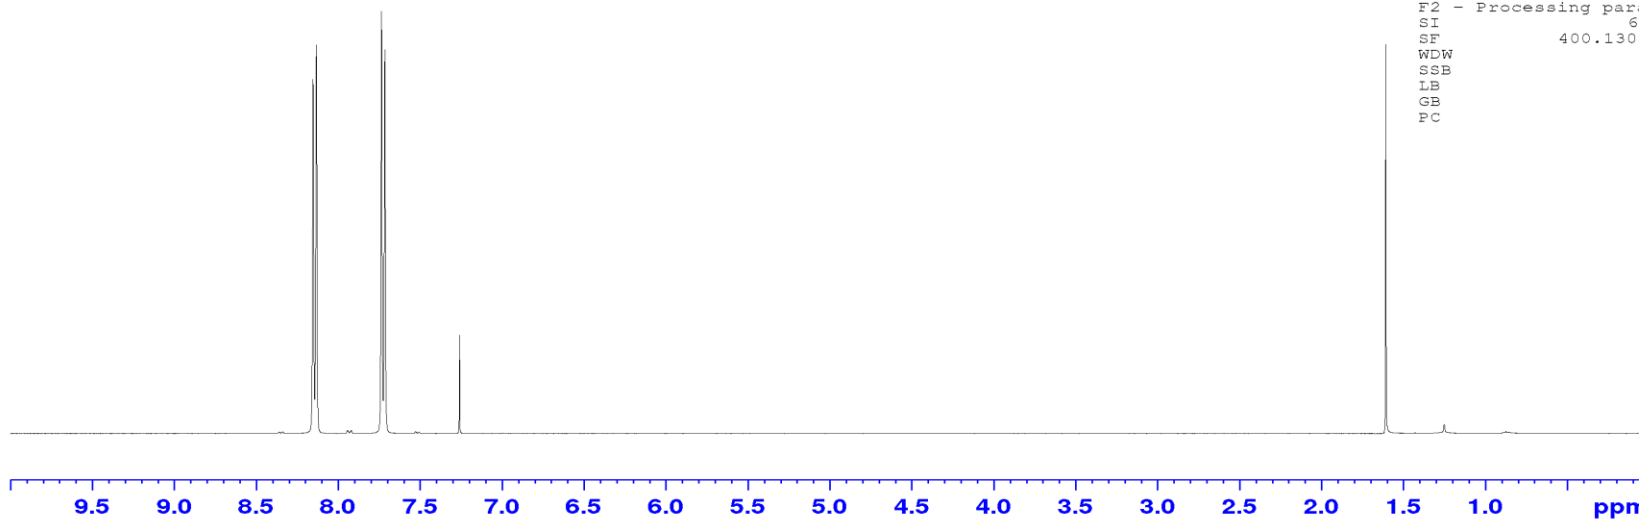

Current Data Parameters  
NAME lhz-20211117-3  
EXPNO 1  
PROCNO 1

F2 - Acquisition Parameters  
Date\_ 20211117  
Time 22.11 h  
INSTRUM spect  
PROBHD Z116098\_0653 (  
PULPROG zg30  
TD 65536  
SOLVENT CDCl3  
NS 8  
DS 2  
SWH 8012.820 Hz  
FIDRES 0.244532 Hz  
AQ 4.0894465 sec  
RG 143.4  
DW 62.400 usec  
DE 6.50 usec  
TE 292.4 K  
D1 1.00000000 sec  
TD0 1  
SFO1 400.1324708 MHz  
NUC1 1H  
P1 10.00 usec  
PLW1 16.43099976 W

F2 - Processing parameters  
SI 65536  
SF 400.1300098 MHz  
WDW EM  
SSB 0  
LB 0.30 Hz  
GB 0  
PC 1.00

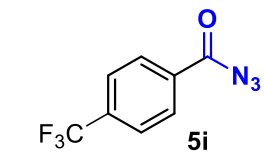

<sup>13</sup>C NMR (100 MHz, CDCl<sub>3</sub>)

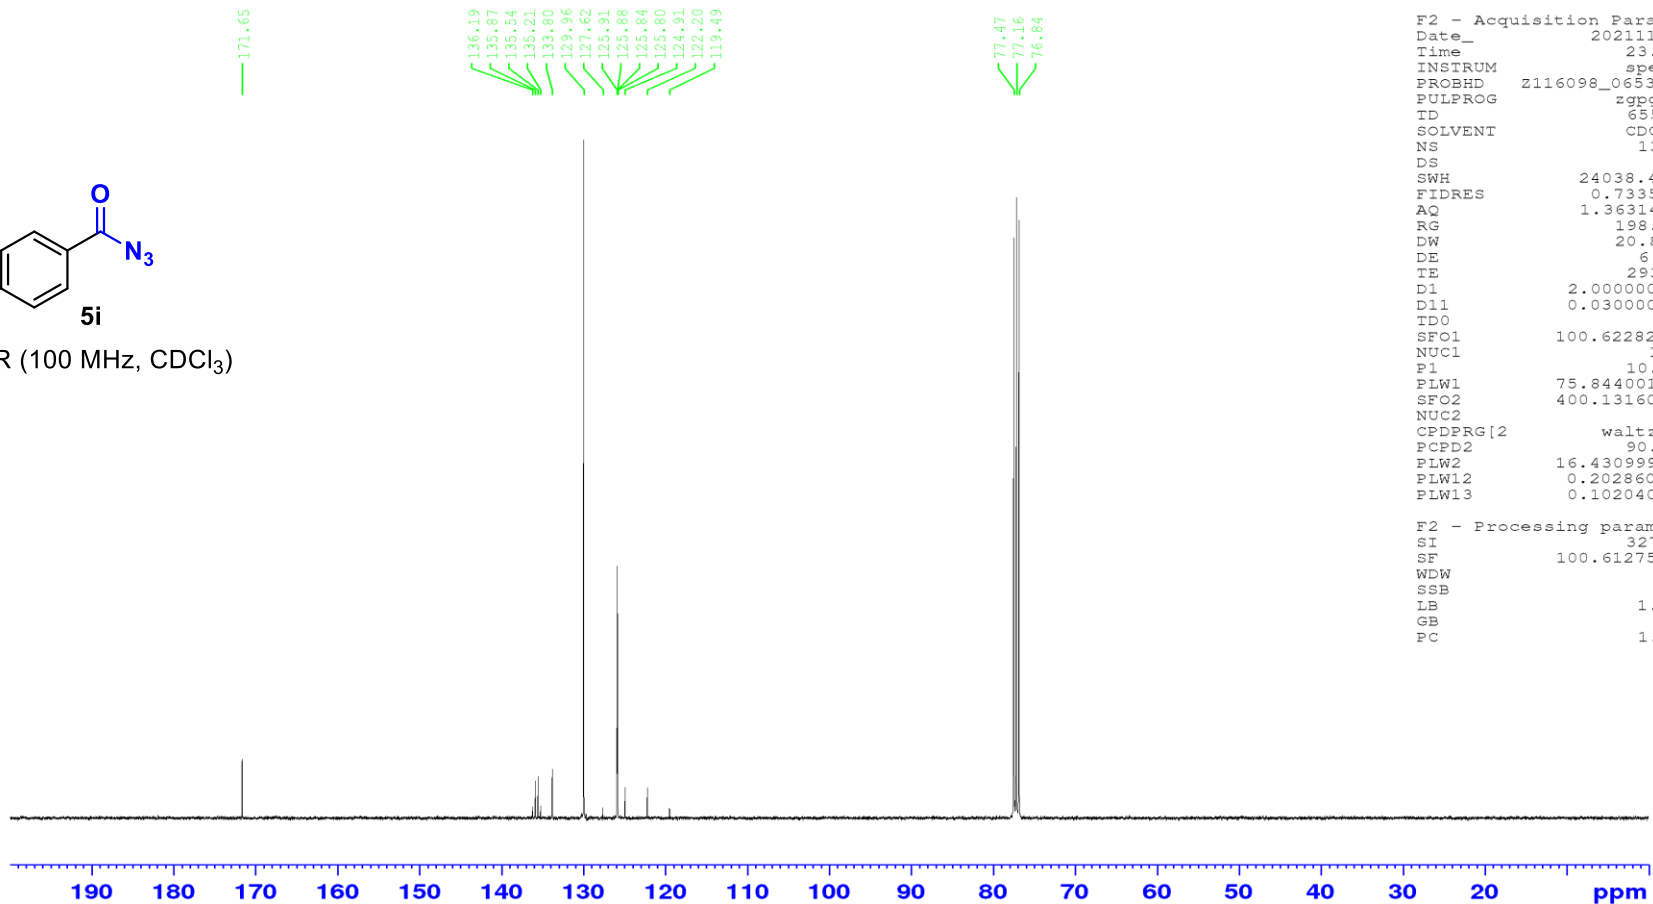

Current Data Parameters  
NAME lhz-20211117-3  
EXPNO 2  
PROCNO 1

F2 - Acquisition Parameters  
Date\_ 20211117  
Time 23.28 h  
INSTRUM spect  
PROBHD Z116098\_0653 (  
PULPROG zgpg30  
TD 65536  
SOLVENT CDCl3  
NS 1333  
DS 4  
SWH 24038.461 Hz  
FIDRES 0.733596 Hz  
AQ 1.3631488 sec  
RG 198.36  
DW 20.800 usec  
DE 6.50 usec  
TE 293.0 K  
D1 2.00000000 sec  
D11 0.03000000 sec  
TD0 1  
SFO1 100.6228298 MHz  
NUC1 13C  
P1 10.00 usec  
PLW1 75.84400177 W  
SFO2 400.1316005 MHz  
NUC2 1H  
CPDPRG[2] waltz16  
PCPD2 90.00 usec  
PLW2 16.43099976 W  
PLW12 0.20286000 W  
PLW13 0.10204000 W

F2 - Processing parameters  
SI 32768  
SF 100.6127564 MHz  
WDW EM  
SSB 0  
LB 1.00 Hz  
GB 0  
PC 1.40



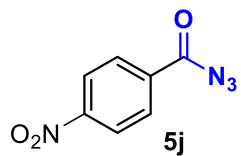

<sup>1</sup>H NMR (400 MHz, CDCl<sub>3</sub>)

8.311  
8.289  
8.213  
8.191

7.260

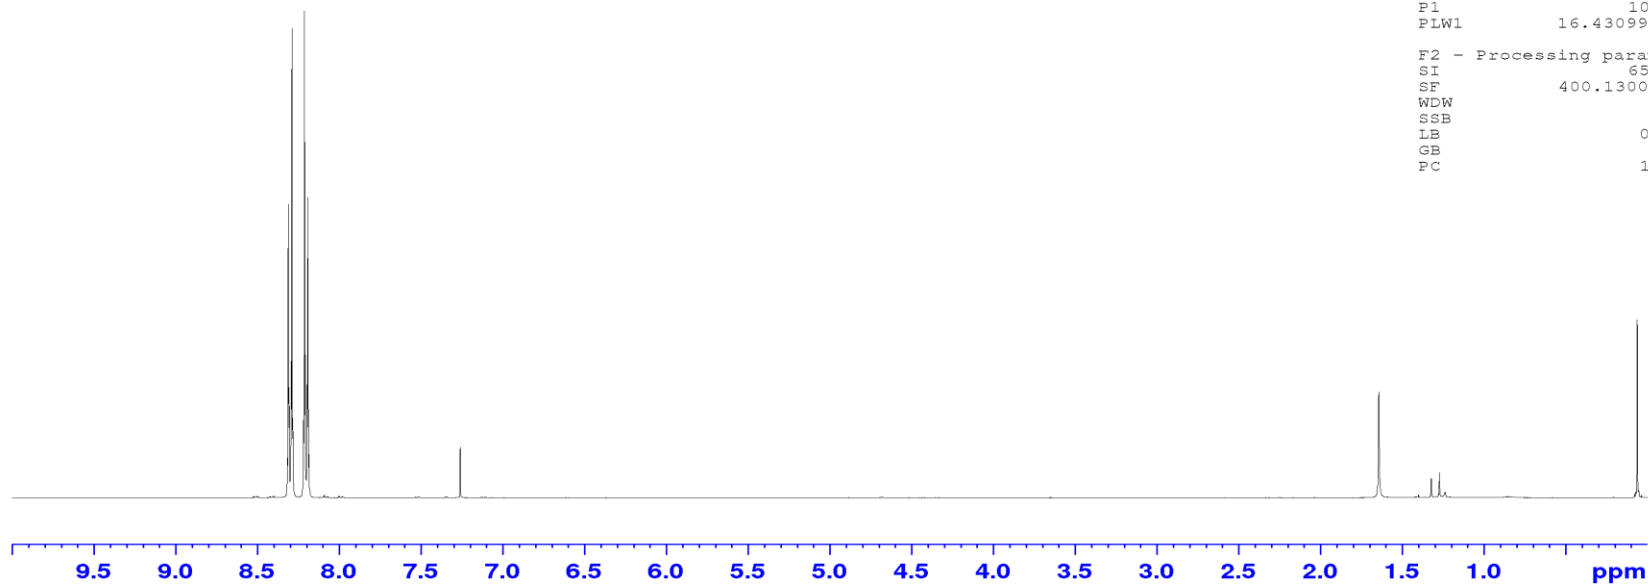

Current Data Parameters  
NAME lhz-20211106-2  
EXPNO 1  
PROCNO 1

F2 - Acquisition Parameters  
Date\_ 20211106  
Time 22.40 h  
INSTRUM spect  
PROBHD Z116098\_0653 (  
PULPROG zg30  
TD 65536  
SOLVENT CDCl3  
NS 8  
DS 2  
SWH 8012.820 Hz  
FIDRES 0.244532 Hz  
AQ 4.0894465 sec  
RG 127.66  
DW 62.400 usec  
DE 6.50 usec  
TE 293.2 K  
D1 1.00000000 sec  
TD0 1  
SFO1 400.1324708 MHz  
NUC1 1H  
P1 10.00 usec  
PLW1 16.43099976 W

F2 - Processing parameters  
SI 65536  
SF 400.1300098 MHz  
WDW EM  
SSB 0  
LB 0.30 Hz  
GB 0  
PC 1.00

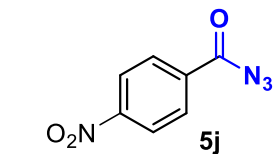

<sup>13</sup>C NMR (100 MHz, CDCl<sub>3</sub>)

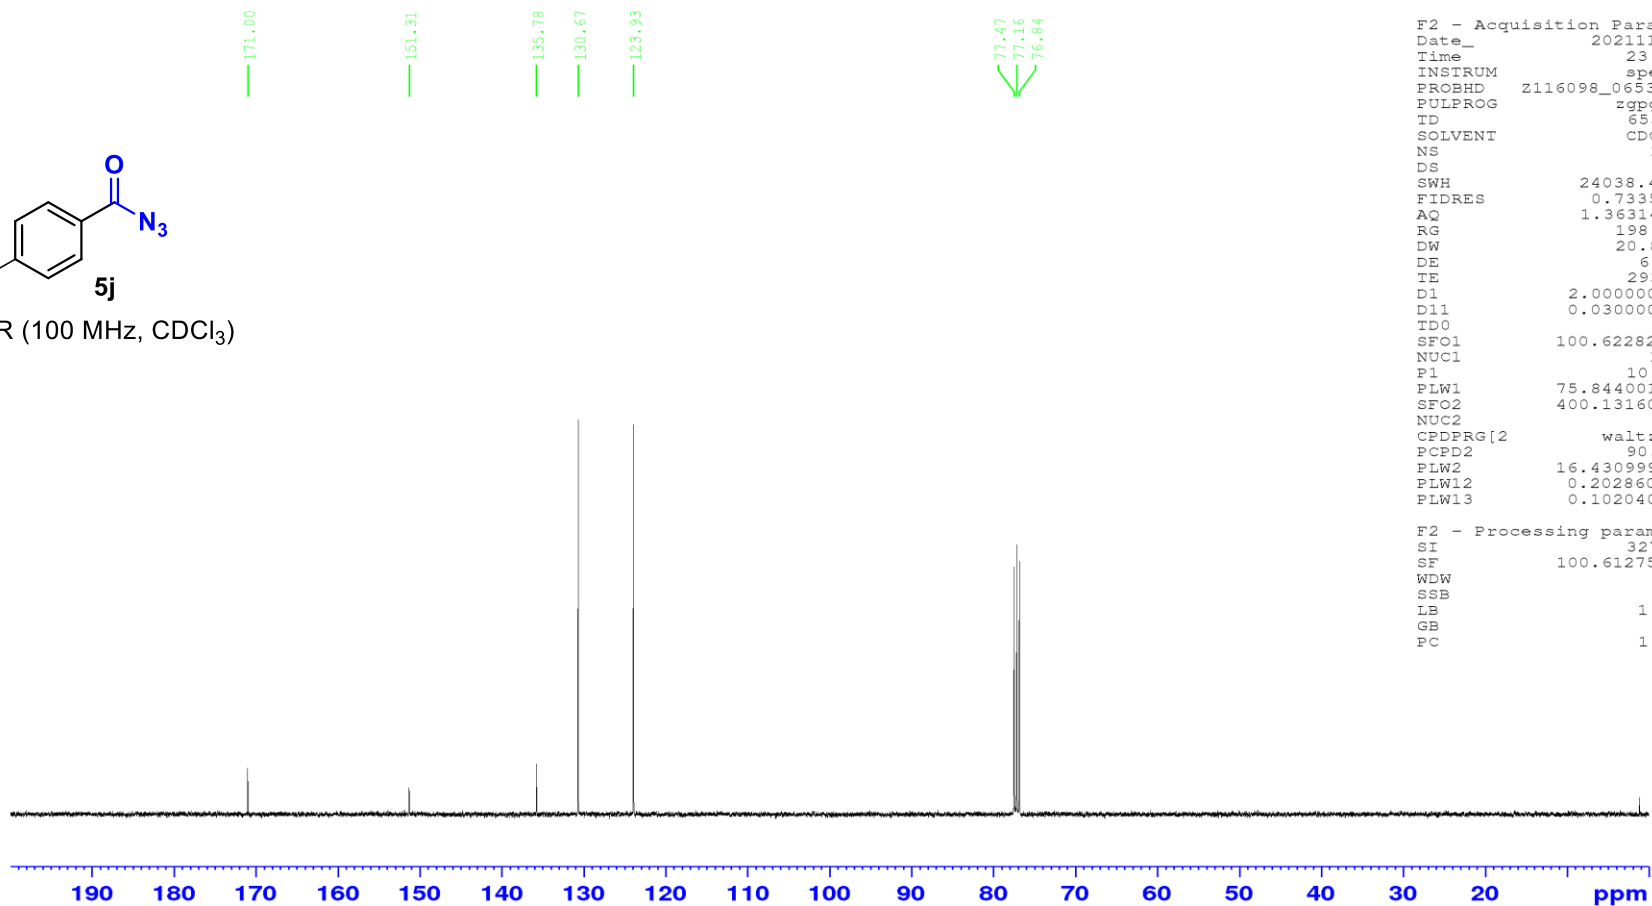

Current Data Parameters  
NAME lhz-20211106-2  
EXPNO 2  
PROCNO 1

F2 - Acquisition Parameters  
Date\_ 20211106  
Time 23.26 h  
INSTRUM spect  
PROBHD z116098\_0653 (  
PULPROG zgpg30  
TD 65536  
SOLVENT CDCl3  
NS 133  
DS 4  
SWH 24038.461 Hz  
FIDRES 0.733596 Hz  
AQ 1.3631488 sec  
RG 198.36  
DW 20.800 usec  
DE 6.50 usec  
TE 293.9 K  
D1 2.00000000 sec  
D11 0.03000000 sec  
TD0 1  
SFO1 100.6228298 MHz  
NUC1 13C  
P1 10.00 usec  
PLW1 75.84400177 W  
SFO2 400.1316005 MHz  
NUC2 1H  
CPDPRG[2] waltz16  
PCPD2 90.00 usec  
PLW2 16.43099976 W  
PLW12 0.20286000 W  
PLW13 0.10204000 W

F2 - Processing parameters  
SI 32768  
SF 100.6127586 MHz  
WDW EM  
SSB 0  
LB 1.00 Hz  
GB 0  
PC 1.40

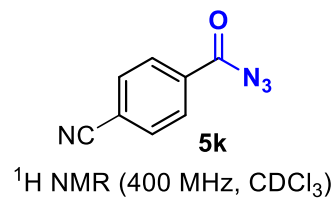

< 8.140  
 < 8.118  
 < 7.775  
 < 7.753  
 — 7.260

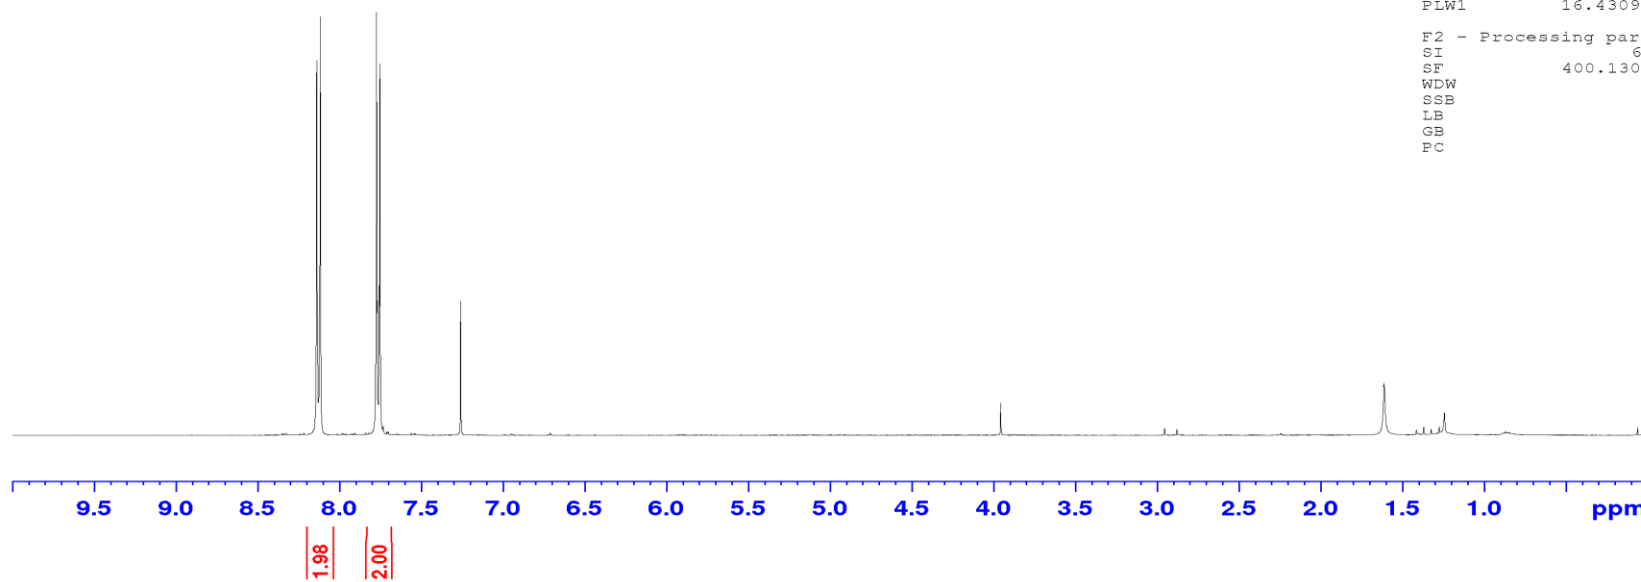

```

Current Data Parameters
NAME      1hz-20221008-1
EXPNO    1
PROCNO   1

F2 - Acquisition Parameters
Date_    20221008
Time     20.34 h
INSTRUM  spect
PROBHD   Z116098_0653 (
PULPROG  zg30
TD       65536
SOLVENT  CDCl3
NS       16
DS       2
SWH      8012.820 Hz
FIDRES   0.244532 Hz
AQ       4.0894465 sec
RG       103.14
DW       62.400 usec
DE       6.50 usec
TE       294.3 K
D1       1.00000000 sec
TD0      1
SFO1     400.1324708 MHz
NUC1     1H
P1       10.00 usec
PLW1     16.43099976 W

F2 - Processing parameters
SI       65536
SF       400.1300096 MHz
WDW      EM
SSB      0
LB       0.30 Hz
GB       0
PC       1.00
  
```

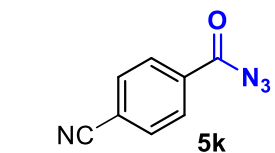

<sup>13</sup>C NMR (100 MHz, CDCl<sub>3</sub>)

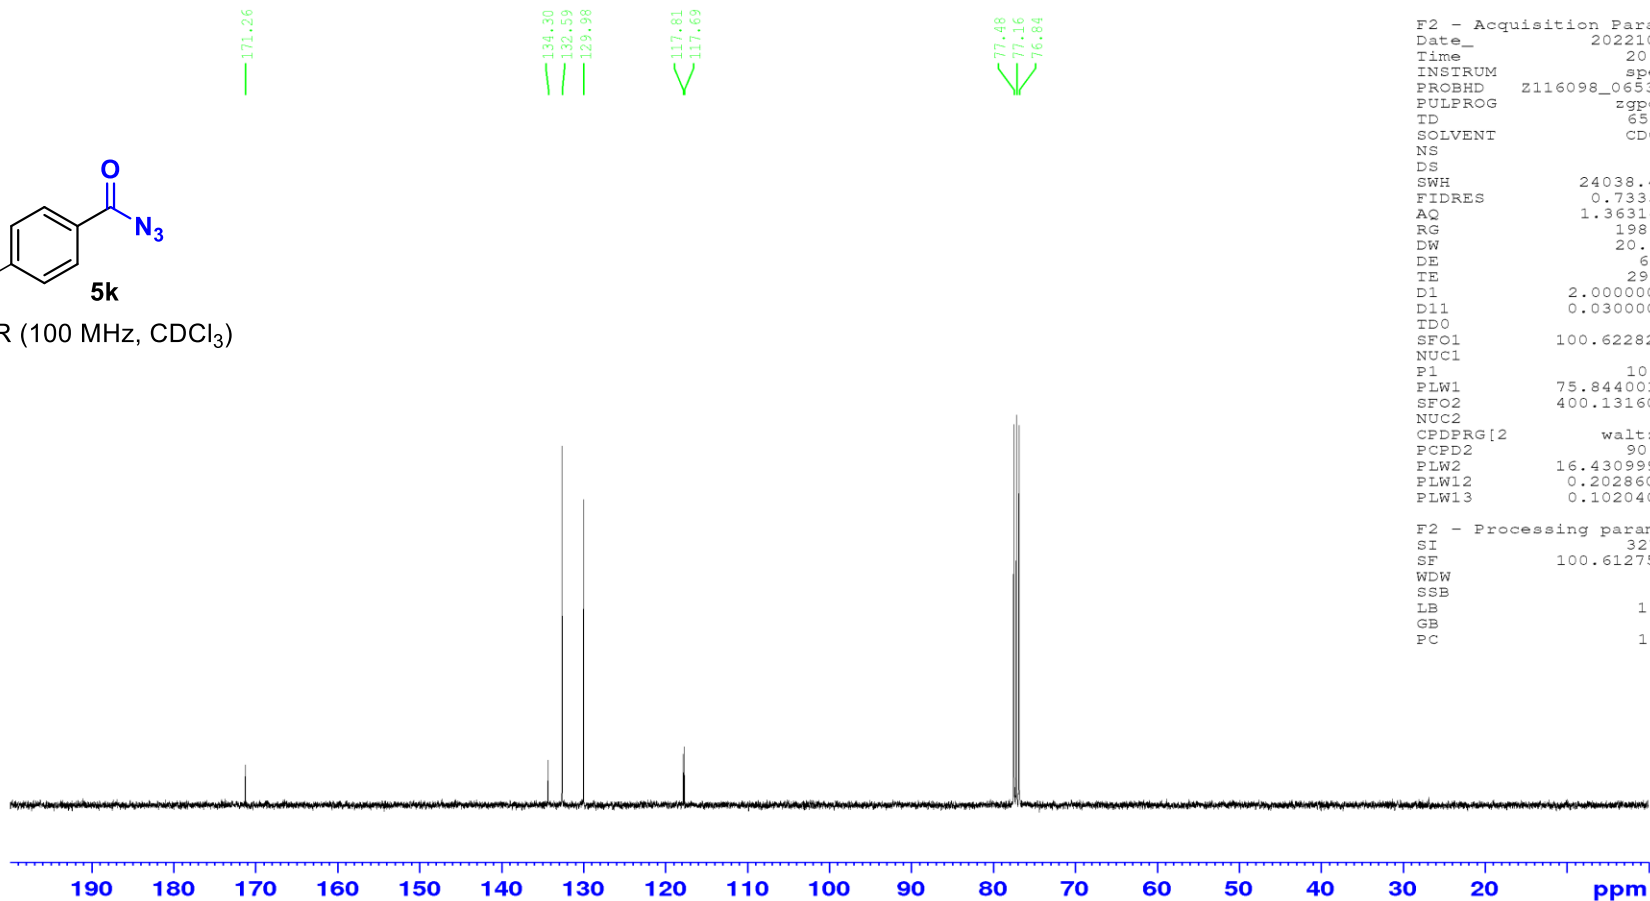

Current Data Parameters  
 NAME lhz-20221008-1  
 EXPNO 2  
 PROCNO 1

F2 - Acquisition Parameters  
 Date\_ 20221008  
 Time 20.52 h  
 INSTRUM spect  
 PROBHD Z116098\_0653 (  
 PULPROG zgpg30  
 TD 65536  
 SOLVENT CDCl3  
 NS 139  
 DS 4  
 SWH 24038.461 Hz  
 FIDRES 0.733596 Hz  
 AQ 1.3631488 sec  
 RG 198.36  
 DW 20.800 usec  
 DE 6.50 usec  
 TE 294.8 K  
 D1 2.00000000 sec  
 D11 0.03000000 sec  
 TD0 1  
 SFO1 100.6228298 MHz  
 NUC1 13c  
 P1 10.00 usec  
 PLW1 75.84400177 W  
 SFO2 400.1316005 MHz  
 NUC2 1H  
 CPDPRG[2] waltz16  
 FCPD2 90.00 usec  
 PLW2 16.43099976 W  
 PLW12 0.20286000 W  
 PLW13 0.10204000 W

F2 - Processing parameters  
 SI 32768  
 SF 100.6127579 MHz  
 WDW EM  
 SSB 0  
 LB 1.00 Hz  
 GB 0  
 PC 1.40

8.088  
7.691  
7.670  
7.641  
7.638  
7.633  
7.624  
7.620  
7.618  
7.612  
7.505  
7.501  
7.497  
7.484  
7.480  
7.468  
7.465  
7.459  
7.442  
7.438  
7.435  
7.426  
7.420  
7.413  
7.405  
7.402  
7.399  
7.260

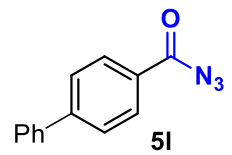

<sup>1</sup>H NMR (400 MHz, CDCl<sub>3</sub>)

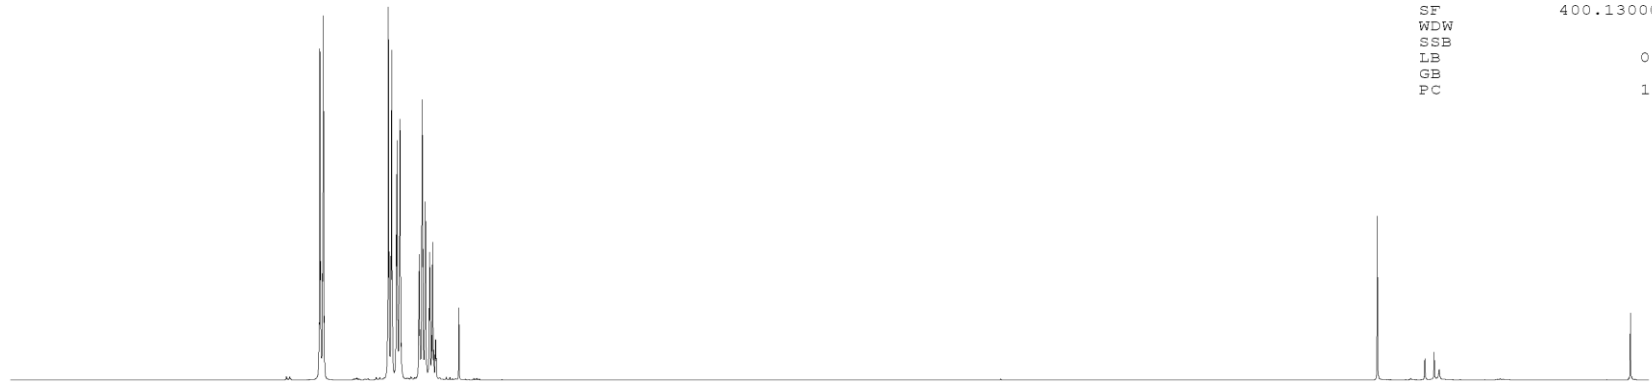

9.5 9.0 8.5 8.0 7.5 7.0 6.5 6.0 5.5 5.0 4.5 4.0 3.5 3.0 2.5 2.0 1.5 1.0 ppm

1.96  
2.04  
2.01  
2.03  
1.01

```

Current Data Parameters
NAME      lhz-20221004-5
EXPNO     1
PROCNO    1

F2 - Acquisition Parameters
Date_     20221004
Time      23.16 h
INSTRUM   spect
PROBHD    Z116098_0653 (
PULPROG   zg30
TD         65536
SOLVENT   CDCl3
NS         8
DS         2
SWH        8012.820 Hz
FIDRES     0.244532 Hz
AQ         4.089465 sec
RG         55.99
DW         62.400 usec
DE         6.50 usec
TE         293.1 K
D1         1.00000000 sec
TD0        1
SFO1      400.1324708 MHz
NUC1       1H
P1         10.00 usec
PLW1      16.43099976 W

F2 - Processing parameters
SI         65536
SF         400.1300098 MHz
WDW        EM
SSB        0
LB         0.30 Hz
GB         0
PC         1.00
  
```

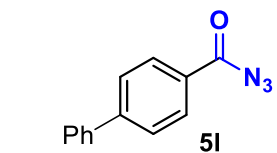

$^{13}\text{C}$  NMR (100 MHz,  $\text{CDCl}_3$ )

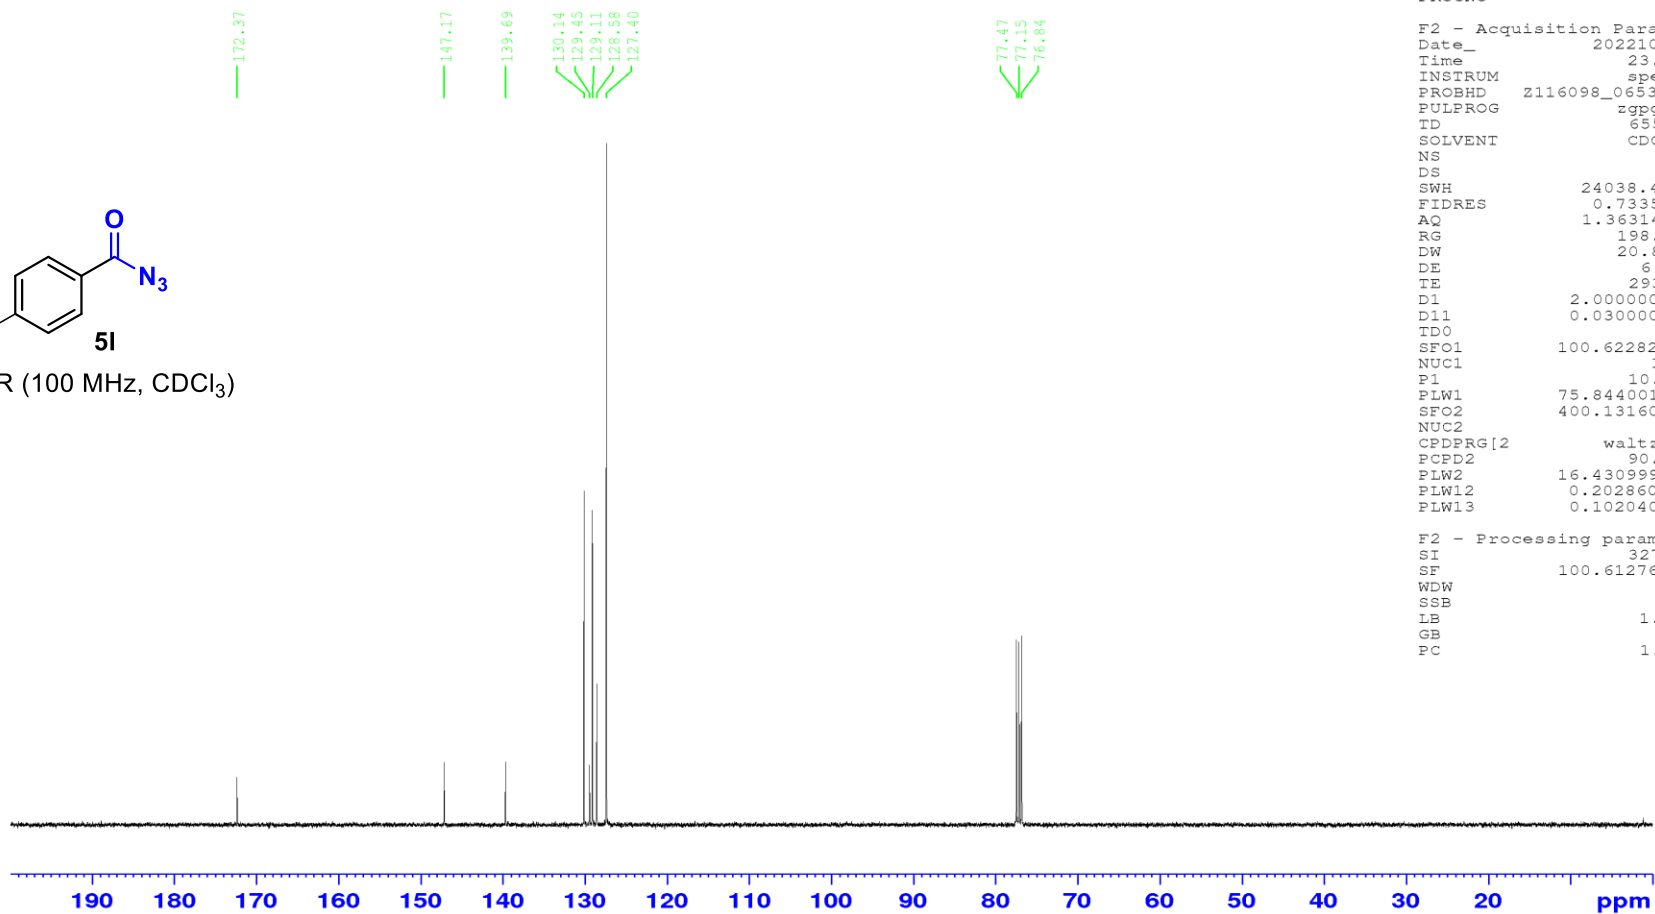

Current Data Parameters  
 NAME lhz-20221004-5  
 EXPNO 2  
 PROCNO 1

F2 - Acquisition Parameters  
 Date\_ 20221004  
 Time 23.22 h  
 INSTRUM spect  
 PROBHD Z116098\_0653 (  
 PULPROG zgpg30  
 TD 65536  
 SOLVENT CDCl3  
 NS 88  
 DS 4  
 SWH 24038.461 Hz  
 FIDRES 0.733596 Hz  
 AQ 1.3631488 sec  
 RG 198.36  
 DW 20.800 usec  
 DE 6.50 usec  
 TE 293.5 K  
 D1 2.00000000 sec  
 D11 0.03000000 sec  
 TD0 1  
 SFO1 100.6228298 MHz  
 NUC1 13c  
 P1 10.00 usec  
 PLW1 75.84400177 W  
 SFO2 400.1316005 MHz  
 NUC2 1H  
 CPDPRG[2] waltz16  
 FCPD2 90.00 usec  
 PLW2 16.43099976 W  
 PLW12 0.20286000 W  
 PLW13 0.10204000 W

F2 - Processing parameters  
 SI 32768  
 SF 100.6127615 MHz  
 WDW EM  
 SSB 0  
 LB 1.00 Hz  
 GB 0  
 FC 1.40

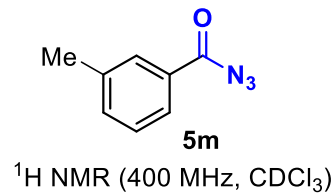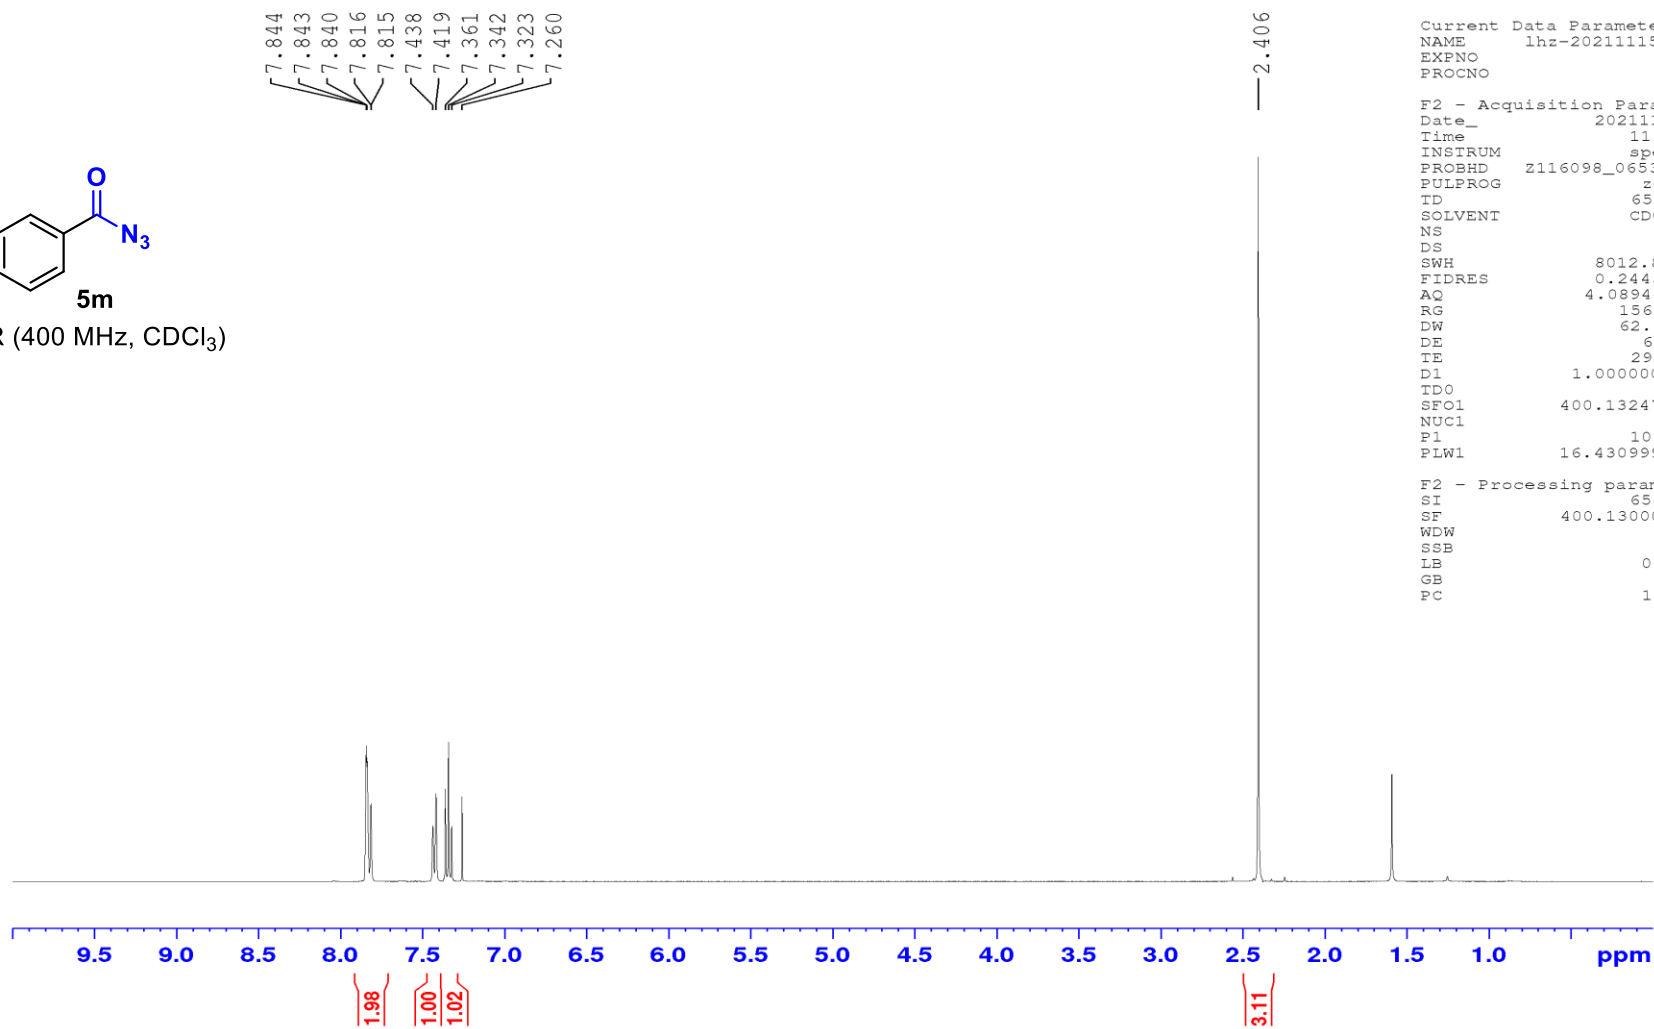

```

Current Data Parameters
NAME      lhz-20211115-4
EXPNO     1
PROCNO    1

F2 - Acquisition Parameters
Date_     20211115
Time      11.22 h
INSTRUM   spect
PROBHD    Z116098_0653 (
PULPROG   zg30
TD         65536
SOLVENT   CDCl3
NS         8
DS         2
SWH        8012.820 Hz
FIDRES     0.244532 Hz
AQ         4.0894465 sec
RG         156.98
DW         62.400 usec
DE         6.50 usec
TE         292.7 K
D1         1.00000000 sec
TD0        1
SFO1       400.1324708 MHz
NUC1       1H
P1         10.00 usec
PLW1       16.43099976 W

F2 - Processing parameters
SI         65536
SF         400.1300098 MHz
WDW        EM
SSB        0
LB         0.30 Hz
GB         0
PC         1.00
  
```

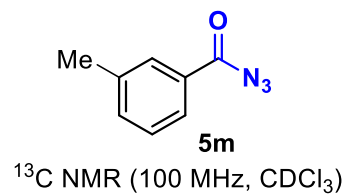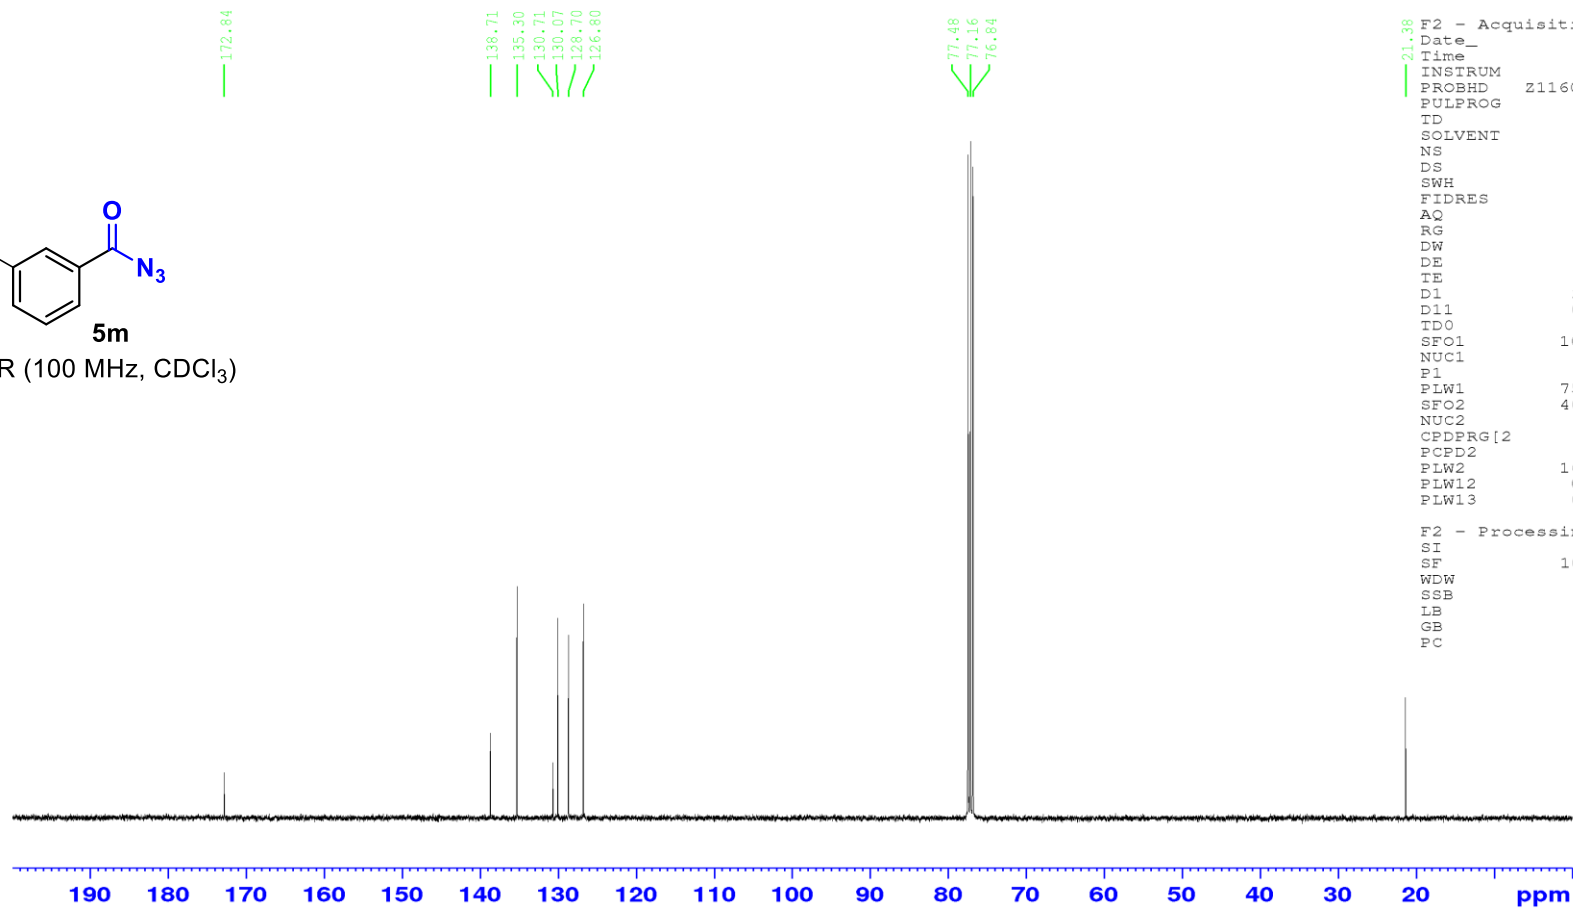

```

Current Data Parameters
NAME      lhz-20211115-4
EXPNO    2
PROCNO   1

F2 - Acquisition Parameters
Date_    20211115
Time     15.32 h
INSTRUM  spect
PROBHD   Z116098_0653 (
PULPROG  zgpg30
TD       65536
SOLVENT  CDCl3
NS       588
DS       4
SWH      24038.461 Hz
FIDRES   0.733596 Hz
AQ       1.3631488 sec
RG       198.36
DW       20.800 usec
DE       6.50 usec
TE       293.2 K
D1       2.00000000 sec
D11      0.03000000 sec
TD0      1
SFO1     100.6228298 MHz
NUC1     13C
E1       10.00 usec
PLW1     75.84400177 W
SFO2     400.1316005 MHz
NUC2     1H
CPDPRG[2] waltz16
PCPD2    90.00 usec
PLW2     16.43099976 W
PLW12    0.20286000 W
PLW13    0.10204000 W

F2 - Processing parameters
SI       32768
SF       100.6127572 MHz
WDW      EM
SSB      0
LB       1.00 Hz
GB       0
PC       1.40
  
```



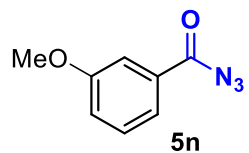

<sup>1</sup>H NMR (400 MHz, CDCl<sub>3</sub>)

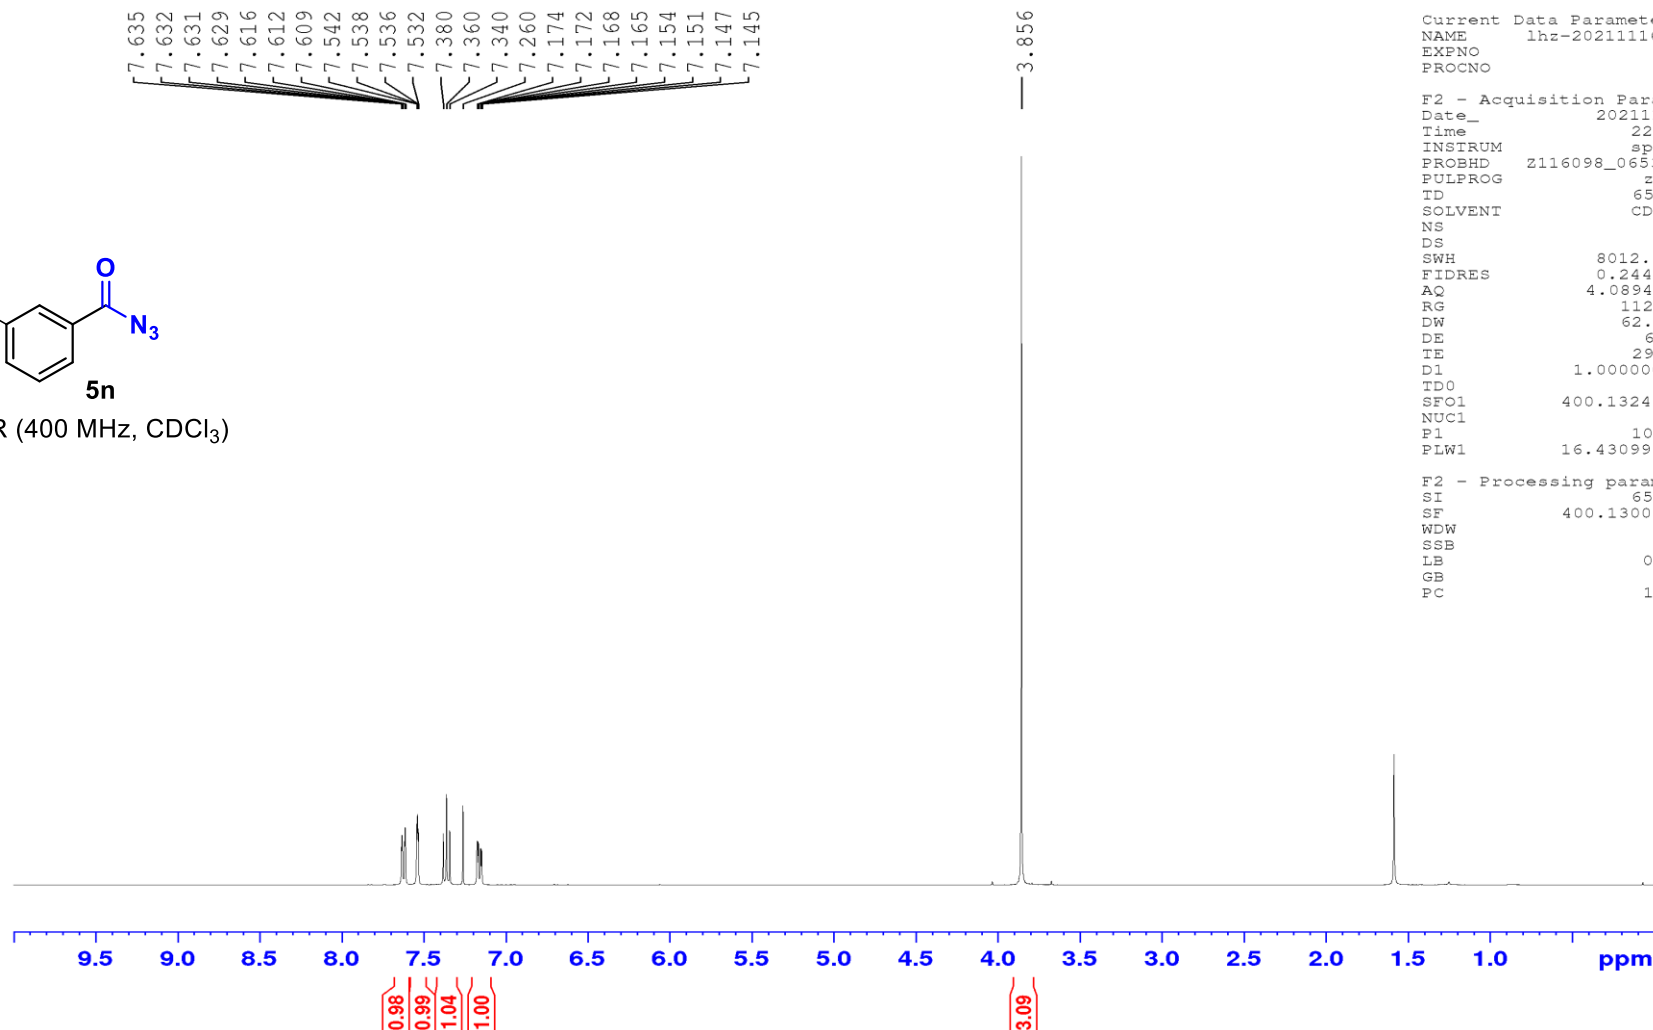

Current Data Parameters  
NAME lhz-20211116-1  
EXPNO 1  
PROCNO 1

F2 - Acquisition Parameters  
Date\_ 20211116  
Time 22.30 h  
INSTRUM spect  
PROBHD Z116098\_0653 (  
PULPROG zg30  
TD 65536  
SOLVENT CDCl3  
NS 8  
DS 2  
SWH 8012.820 Hz  
FIDRES 0.244532 Hz  
AQ 4.0894465 sec  
RG 112.15  
DW 62.400 usec  
DE 6.50 usec  
TE 292.5 K  
D1 1.00000000 sec  
TD0 1  
SFO1 400.1324708 MHz  
NUC1 1H  
P1 10.00 usec  
PLW1 16.43099976 W

F2 - Processing parameters  
SI 65536  
SF 400.1300099 MHz  
WDW EM  
SSB 0  
LB 0.30 Hz  
GB 0  
PC 1.00

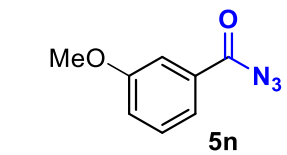

<sup>13</sup>C NMR (100 MHz, CDCl<sub>3</sub>)

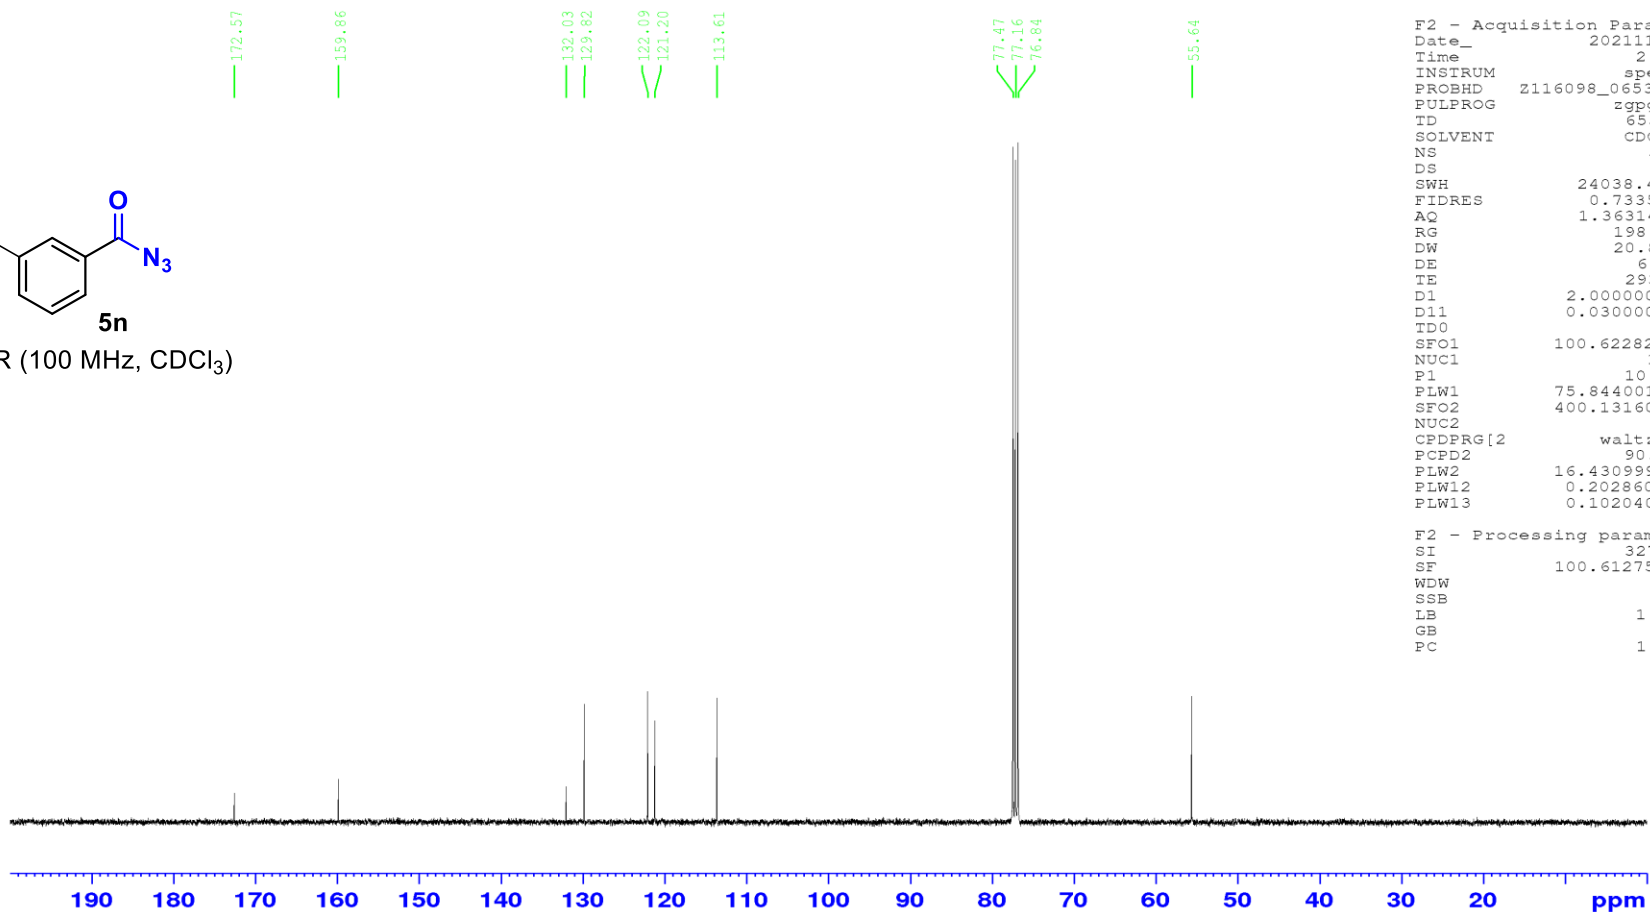

Current Data Parameters  
NAME lhz-20211116-1  
EXPNO 2  
PROCNO 1

F2 - Acquisition Parameters  
Date\_ 20211117  
Time 2.17 h  
INSTRUM spect  
PROBHD Z116098\_0653 (  
PULPROG zgpg30  
TD 65536  
SOLVENT CDCl3  
NS 512  
DS 4  
SWH 24038.461 Hz  
FIDRES 0.733596 Hz  
AQ 1.3631488 sec  
RG 198.36  
DW 20.800 usec  
DE 6.50 usec  
TE 293.2 K  
D1 2.00000000 sec  
D11 0.03000000 sec  
TD0 1  
SFO1 100.6228298 MHz  
NUC1 13C  
P1 10.00 usec  
PLW1 75.84400177 W  
SFO2 400.1316005 MHz  
NUC2 1H  
CPDPRG[2] waltz16  
PCPD2 90.00 usec  
PLW2 16.43099976 W  
PLW12 0.20286000 W  
PLW13 0.10204000 W

F2 - Processing parameters  
SI 32768  
SF 100.6127569 MHz  
WDW EM  
SSB 0  
LB 1.00 Hz  
GB 0  
PC 1.40

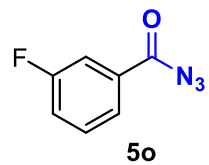

<sup>1</sup>H NMR (400 MHz, CDCl<sub>3</sub>)

7.820  
7.817  
7.816  
7.814  
7.728  
7.724  
7.722  
7.718  
7.705  
7.701  
7.699  
7.695  
7.472  
7.458  
7.452  
7.438  
7.432  
7.418  
7.346  
7.343  
7.339  
7.337  
7.325  
7.323  
7.319  
7.316  
7.305  
7.302  
7.298  
7.295  
7.260

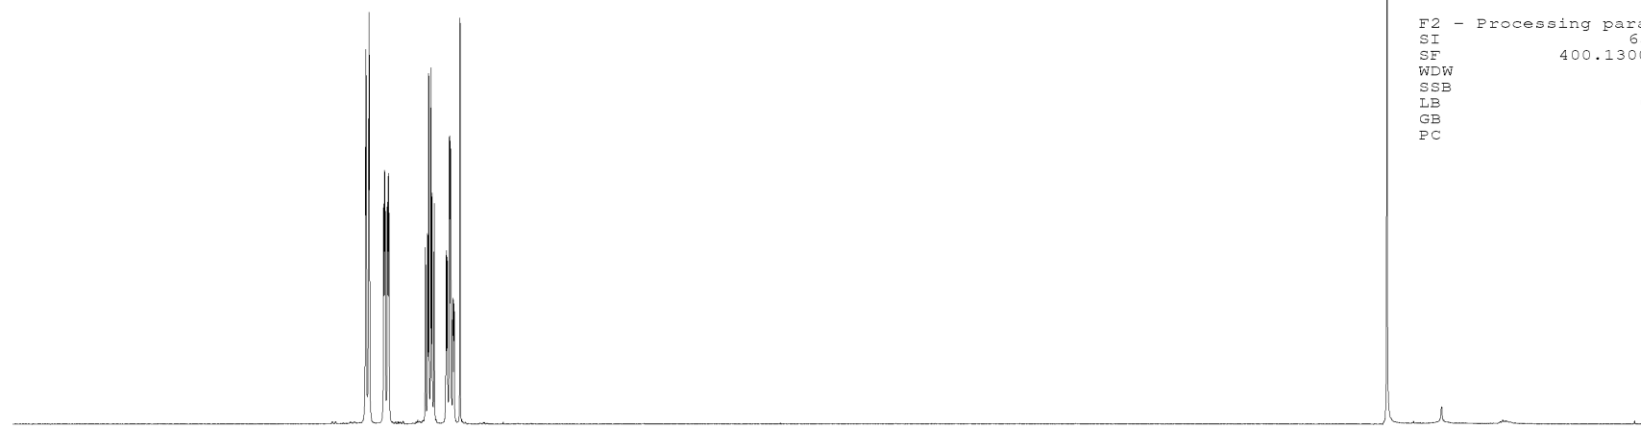

9.5 9.0 8.5 8.0 7.5 7.0 6.5 6.0 5.5 5.0 4.5 4.0 3.5 3.0 2.5 2.0 1.5 1.0 ppm

1.00  
0.99  
1.02  
1.00

Current Data Parameters  
NAME lhz-20211115-1  
EXPNO 1  
PROCNO 1

F2 - Acquisition Parameters  
Date\_ 20211115  
Time 11.10 h  
INSTRUM spect  
PROBHD Z116098\_0653 (  
PULPROG zg30  
TD 65536  
SOLVENT CDCl3  
NS 8  
DS 2  
SWH 8012.820 Hz  
FIDRES 0.244532 Hz  
AQ 4.0894465 sec  
RG 112.15  
DW 62.400 usec  
DE 6.50 usec  
TE 292.6 K  
D1 1.00000000 sec  
TD0 1  
SFO1 400.1324708 MHz  
NUC1 1H  
P1 10.00 usec  
PLW1 16.43099976 W

F2 - Processing parameters  
SI 65536  
SF 400.1300099 MHz  
WDW EM  
SSB 0  
LB 0.30 Hz  
GB 0  
PC 1.00

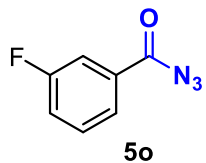

<sup>13</sup>C NMR (100 MHz, CDCl<sub>3</sub>)

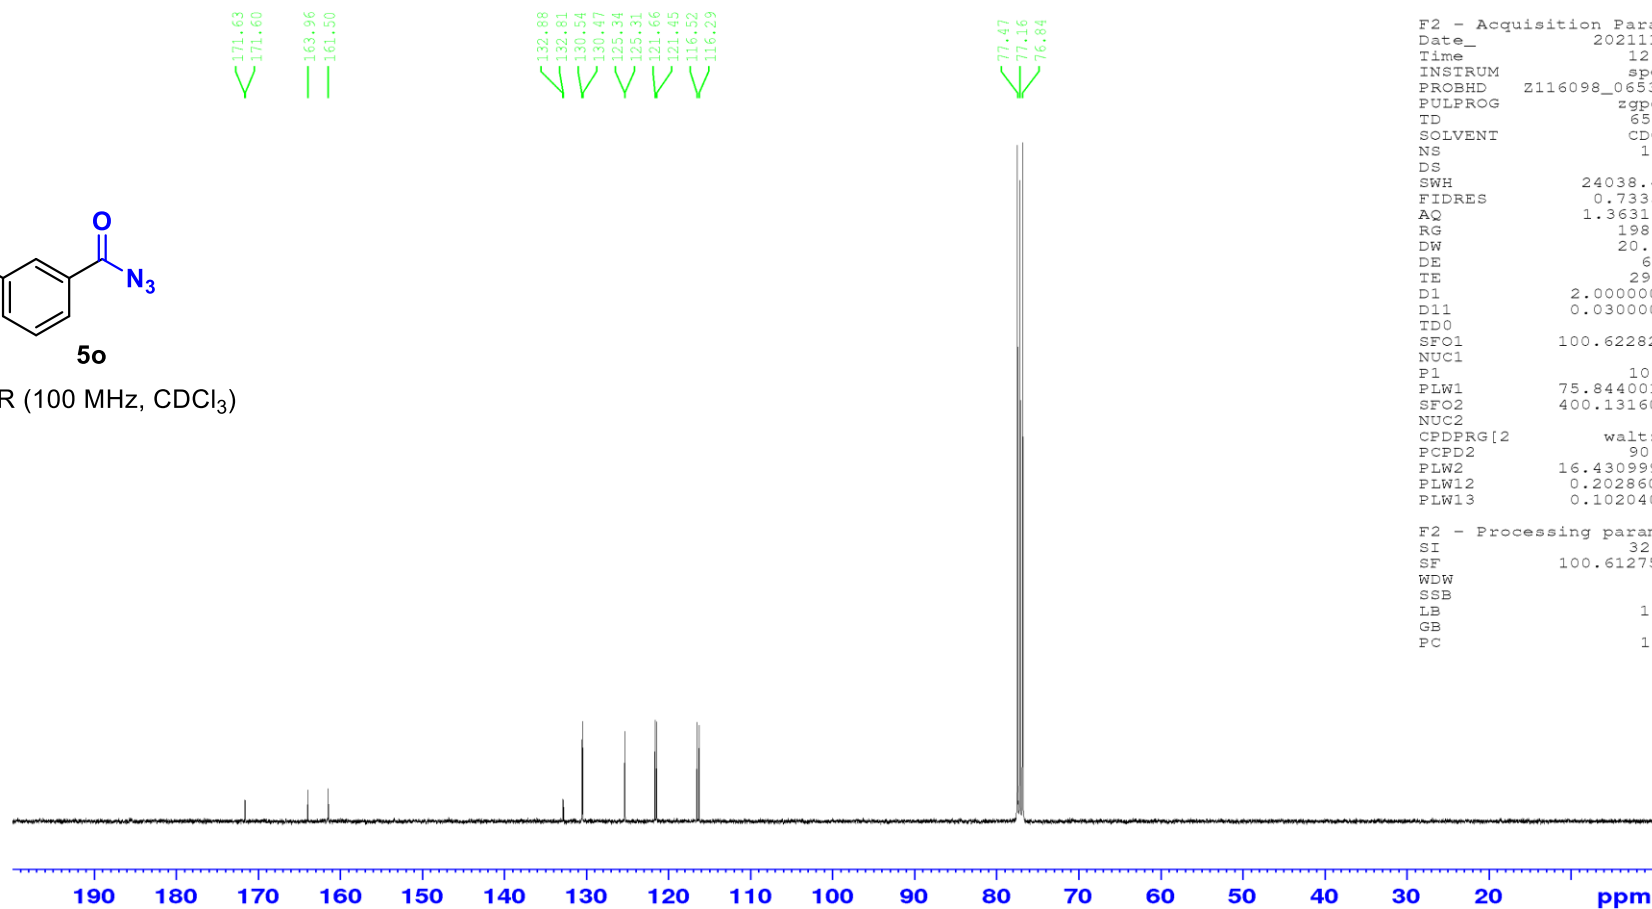

Current Data Parameters  
NAME lhz-20211115-1  
EXPNO 2  
PROCNO 1

F2 - Acquisition Parameters  
Date\_ 20211115  
Time 12.57 h  
INSTRUM spect  
PROBHD Z116098\_0653 (  
PULPROG zgpg30  
TD 65536  
SOLVENT CDCl3  
NS 1024  
DS 4  
SWH 24038.461 Hz  
FIDRES 0.733596 Hz  
AQ 1.3631488 sec  
RG 198.36  
DW 20.800 usec  
DE 6.50 usec  
TE 293.3 K  
D1 2.00000000 sec  
D11 0.03000000 sec  
TD0 1  
SFO1 100.6228298 MHz  
NUC1 13C  
P1 10.00 usec  
PLW1 75.84400177 W  
SFO2 400.1316005 MHz  
NUC2 1H  
CPDPRG[2] waltz16  
PCPD2 90.00 usec  
PLW2 16.43099976 W  
PLW12 0.20286000 W  
PLW13 0.10204000 W

F2 - Processing parameters  
SI 32768  
SF 100.6127569 MHz  
WDW EM  
SSB 0  
LB 1.00 Hz  
GB 0  
FC 1.40

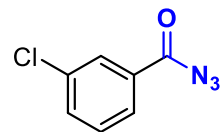

5p

<sup>1</sup>H NMR (400 MHz, CDCl<sub>3</sub>)

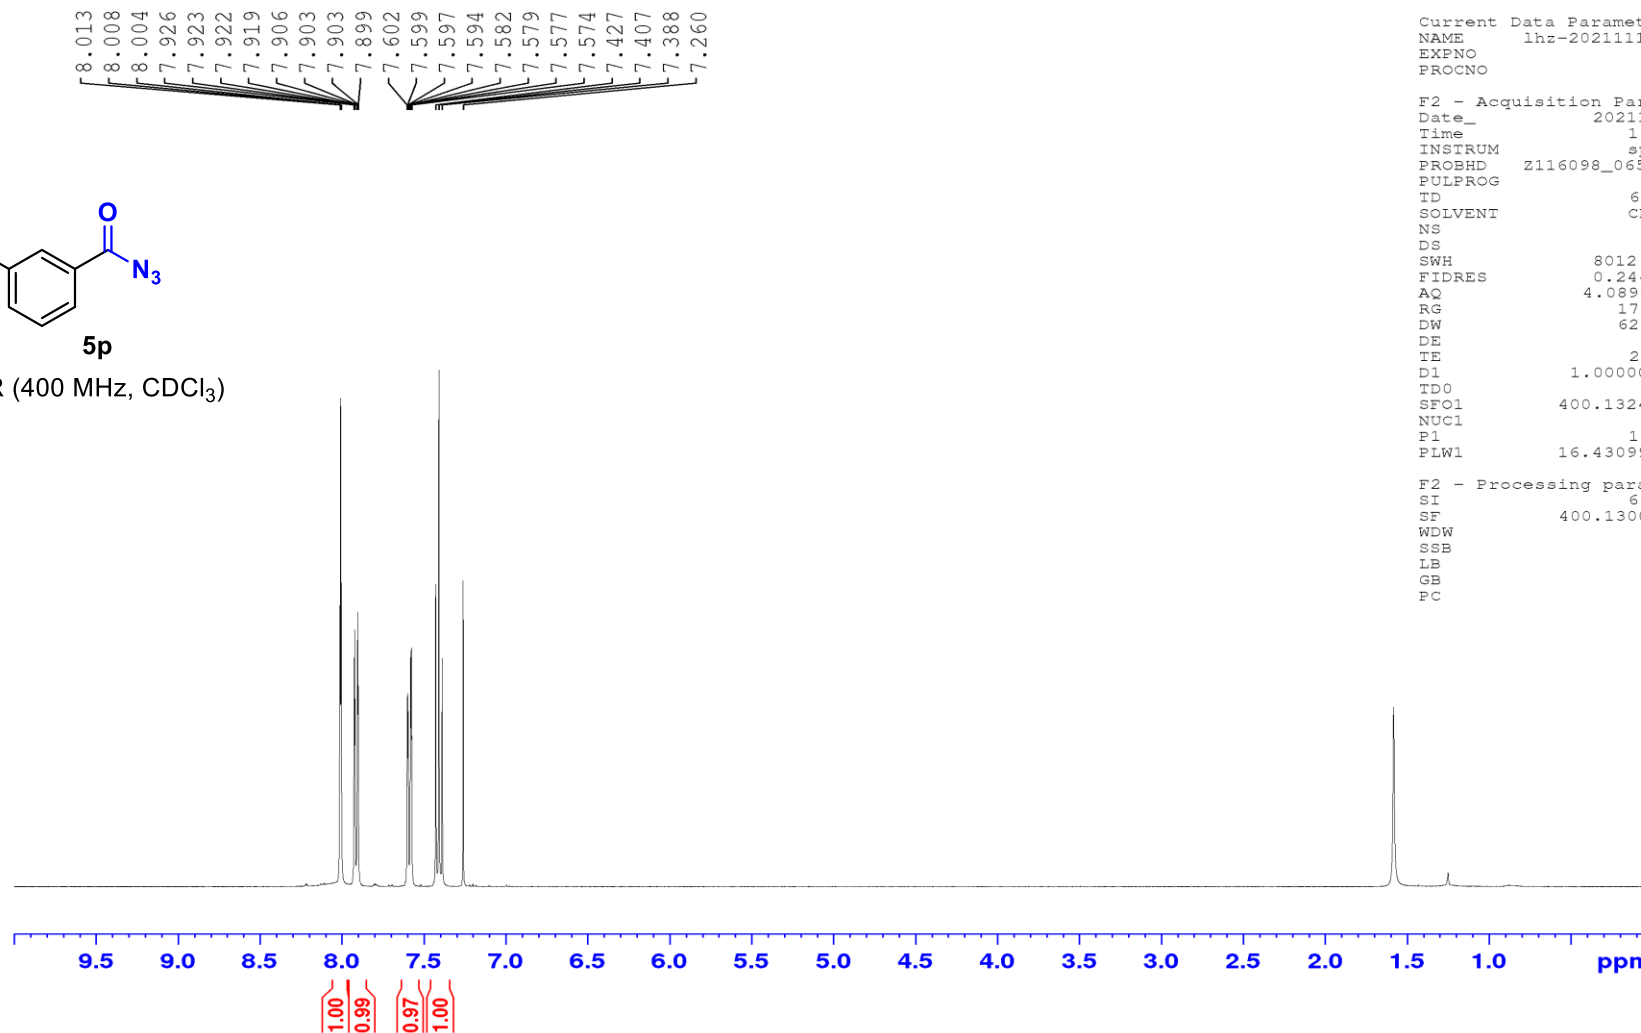

Current Data Parameters  
 NAME lhz-20211115-2  
 EXPNO 1  
 PROCNO 1

F2 - Acquisition Parameters  
 Date\_ 20211115  
 Time 11.14 h  
 INSTRUM spect  
 PROBHD Z116098\_0653 (  
 PULPROG zg30  
 TD 65536  
 SOLVENT CDCl3  
 NS 8  
 DS 2  
 SWH 8012.820 Hz  
 FIDRES 0.244532 Hz  
 AQ 4.0894465 sec  
 RG 175.57  
 DW 62.400 usec  
 DE 6.50 usec  
 TE 292.5 K  
 D1 1.00000000 sec  
 TD0 1  
 SFO1 400.1324708 MHz  
 NUC1 1H  
 P1 10.00 usec  
 PLW1 16.43099976 W

F2 - Processing parameters  
 SI 65536  
 SF 400.1300099 MHz  
 WDW EM  
 SSB 0  
 LB 0.30 Hz  
 GB 0  
 PC 1.00

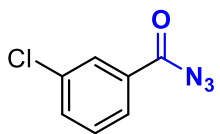

5p

<sup>13</sup>C NMR (100 MHz, CDCl<sub>3</sub>)

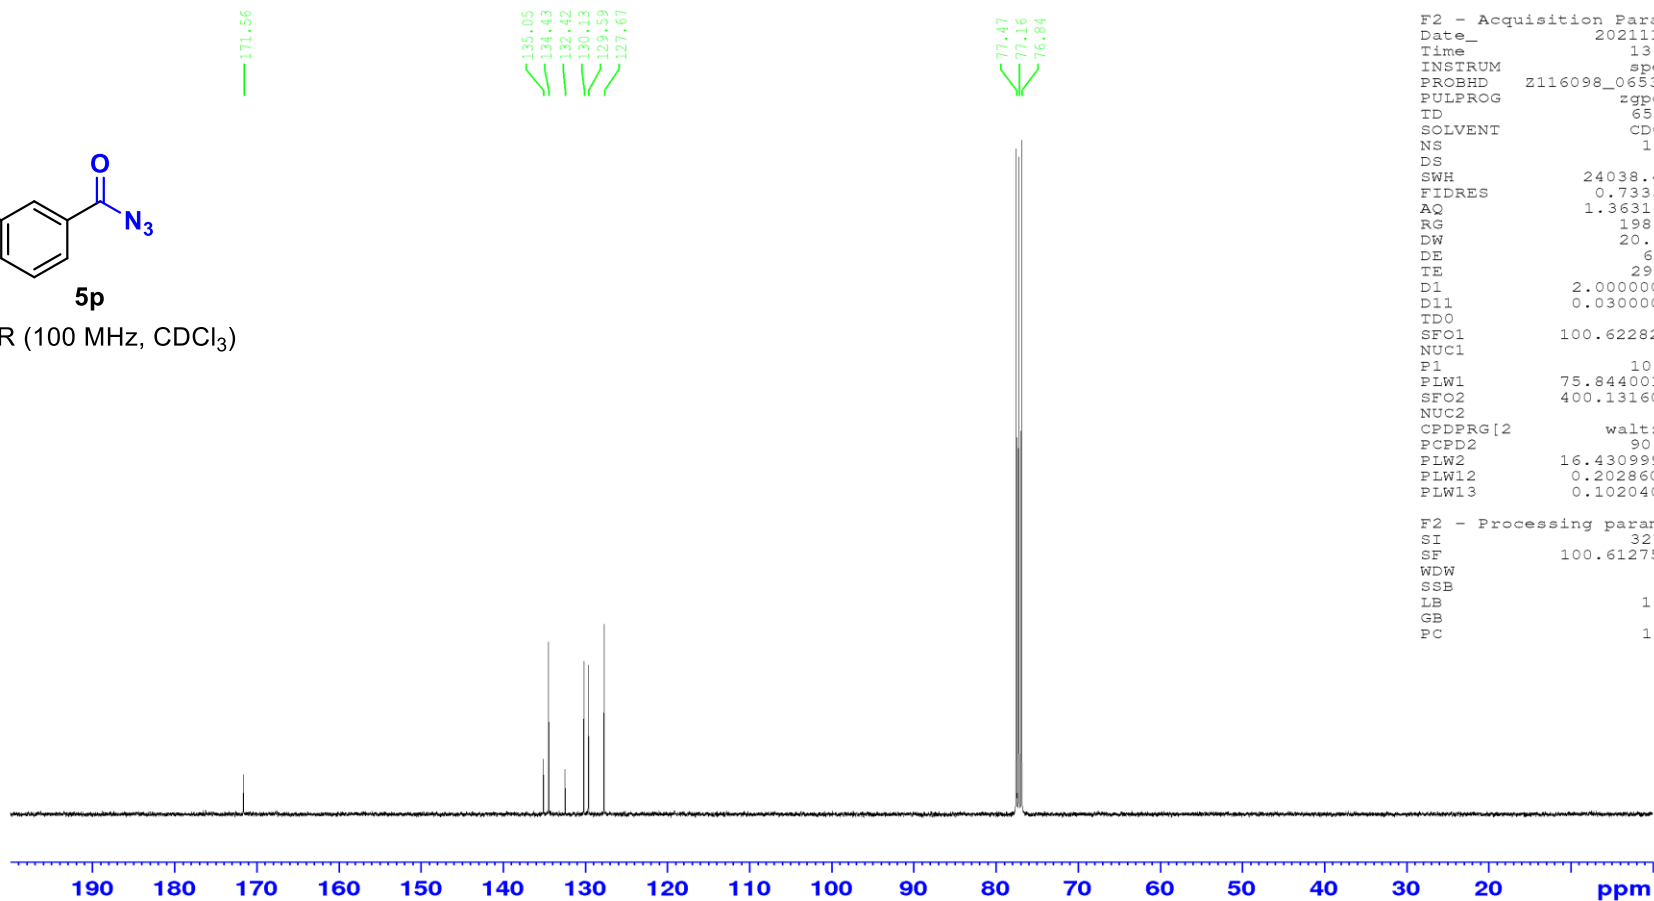

Current Data Parameters  
NAME lhz-20211115-2  
EXPNO 2  
PROCNO 1

F2 - Acquisition Parameters  
Date\_ 20211115  
Time 13.59 h  
INSTRUM spect  
PROBHD Z116098\_0653 (  
PULPROG zgpg30  
TD 65536  
SOLVENT CDCl3  
NS 1024  
DS 4  
SWH 24038.461 Hz  
FIDRES 0.733596 Hz  
AQ 1.3631488 sec  
RG 198.36  
DW 20.800 usec  
DE 6.50 usec  
TE 293.3 K  
D1 2.00000000 sec  
D11 0.03000000 sec  
TD0 1  
SFO1 100.6228298 MHz  
NUC1 13C  
P1 10.00 usec  
PLW1 75.84400177 W  
SFO2 400.1316005 MHz  
NUC2 1H  
CPDPRG[2] waltz16  
PCPD2 90.00 usec  
PLW2 16.43099976 W  
PLW12 0.20286000 W  
PLW13 0.10204000 W

F2 - Processing parameters  
SI 32768  
SF 100.6127568 MHz  
WDW EM  
SSB 0  
LB 1.00 Hz  
GB 0  
PC 1.40

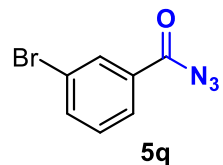

<sup>1</sup>H NMR (400 MHz, CDCl<sub>3</sub>)

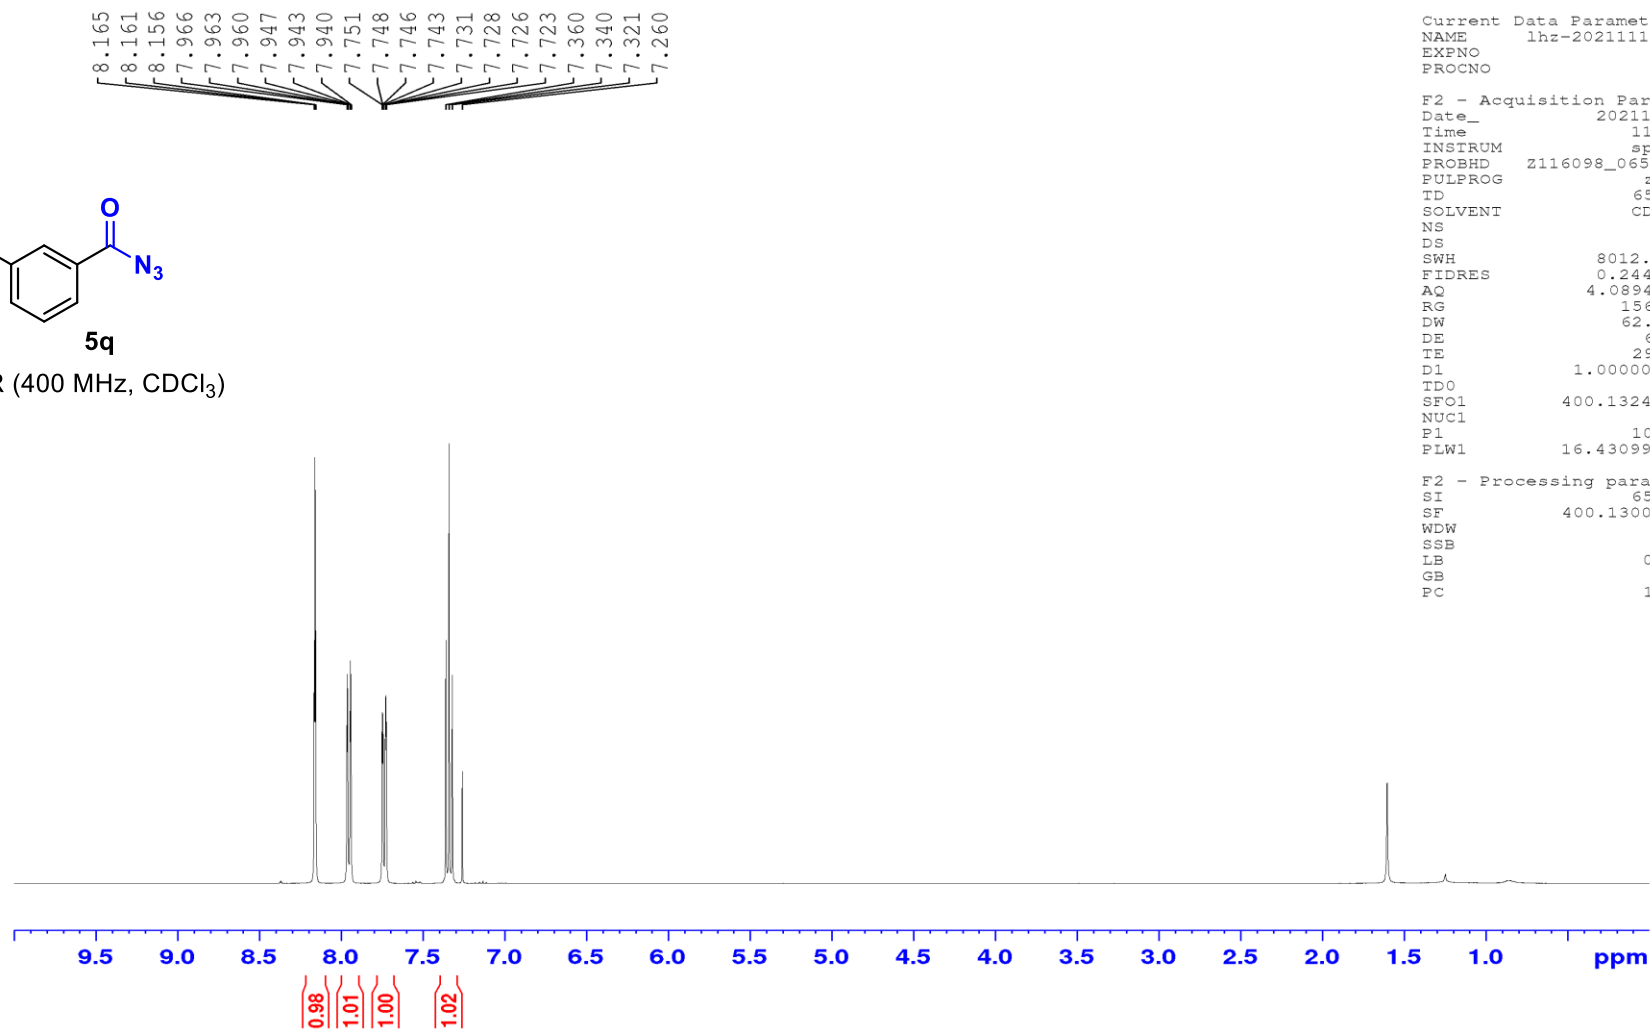

Current Data Parameters  
 NAME lhz-20211115-3  
 EXPNO 1  
 PROCNO 1

F2 - Acquisition Parameters  
 Date\_ 20211115  
 Time 11.18 h  
 INSTRUM spect  
 PROBHD Z116098\_0653 (  
 PULPROG zg30  
 TD 65536  
 SOLVENT CDCl3  
 NS 8  
 DS 2  
 SWH 8012.820 Hz  
 FIDRES 0.244532 Hz  
 AQ 4.0894465 sec  
 RG 156.98  
 DW 62.400 usec  
 DE 6.50 usec  
 TE 292.5 K  
 D1 1.00000000 sec  
 TD0 1  
 SFO1 400.1324708 MHz  
 NUC1 1H  
 P1 10.00 usec  
 PLW1 16.43099976 W

F2 - Processing parameters  
 SI 65536  
 SF 400.1300099 MHz  
 WDW EM  
 SSB 0  
 LB 0.30 Hz  
 GB 0  
 PC 1.00

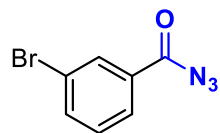

5q

<sup>13</sup>C NMR (100 MHz, CDCl<sub>3</sub>)

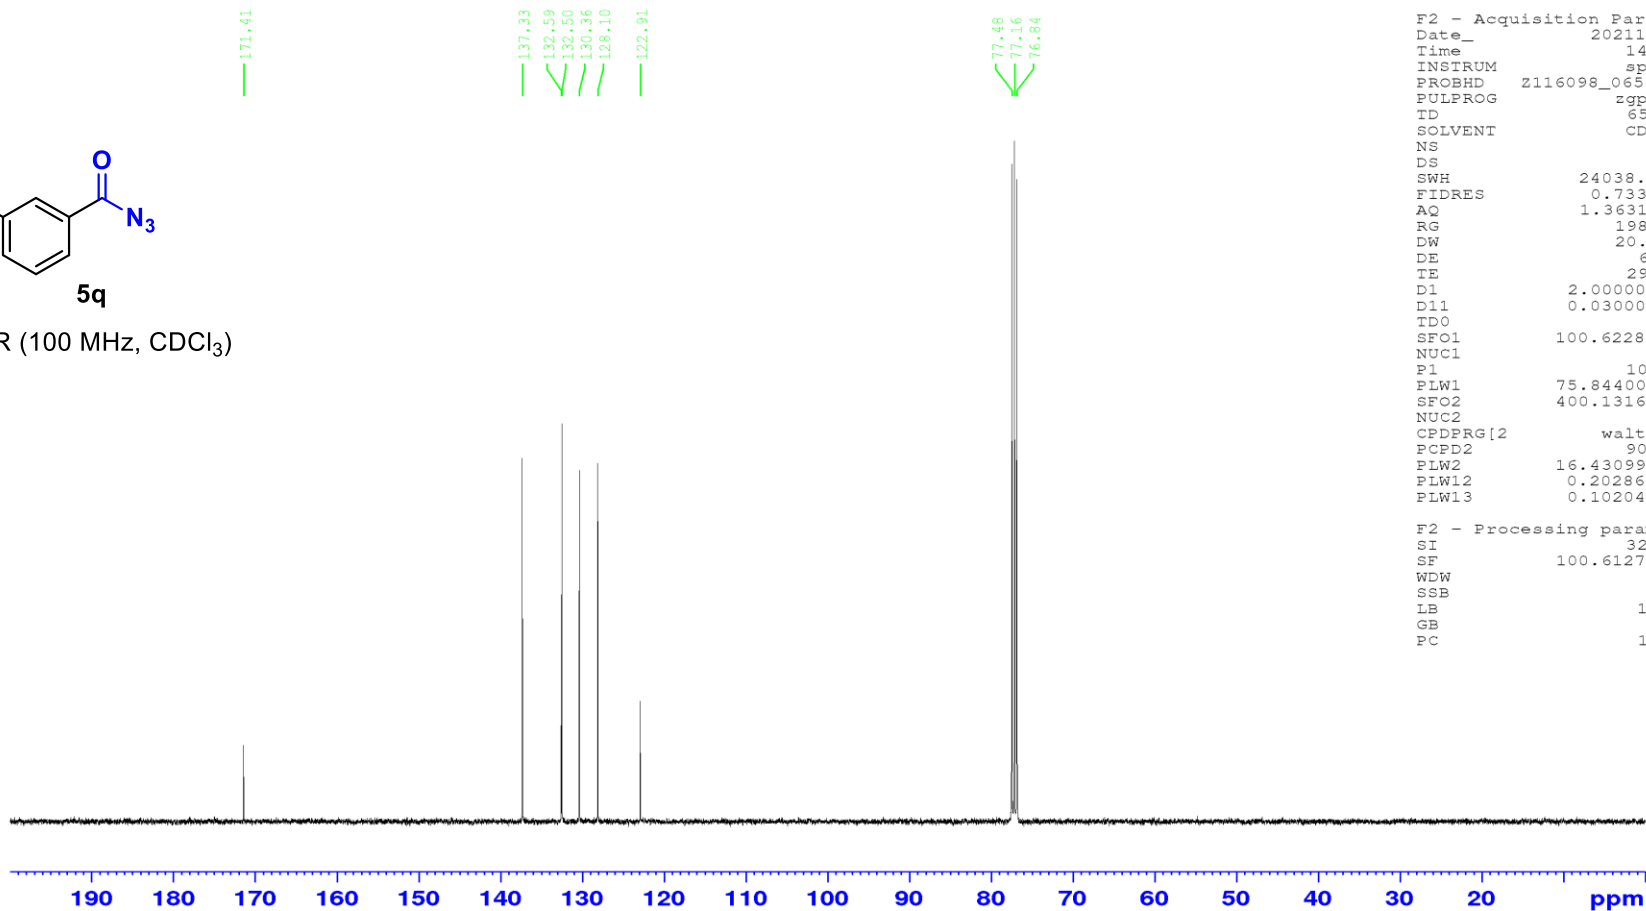

Current Data Parameters  
NAME lhz-20211115-3  
EXPNO 2  
PROCNO 1

F2 - Acquisition Parameters  
Date\_ 20211115  
Time 14.36 h  
INSTRUM spect  
PROBHD Z116098\_0653 (  
PULPROG zgpg30  
TD 65536  
SOLVENT CDCl3  
NS 588  
DS 4  
SWH 24038.461 Hz  
FIDRES 0.733596 Hz  
AQ 1.3631488 sec  
RG 198.36  
DW 20.800 usec  
DE 6.50 usec  
TE 293.1 K  
D1 2.00000000 sec  
D11 0.03000000 sec  
TD0 1  
SFO1 100.6228298 MHz  
NUC1 13C  
P1 10.00 usec  
PLW1 75.84400177 W  
SFO2 400.1316005 MHz  
NUC2 1H  
CPDPRG[2] waltz16  
PCPD2 90.00 usec  
PLW2 16.43099976 W  
PLW12 0.20286000 W  
PLW13 0.10204000 W

F2 - Processing parameters  
SI 32768  
SF 100.6127579 MHz  
WDW EM  
SSB 0  
LB 1.00 Hz  
GB 0  
PC 1.40



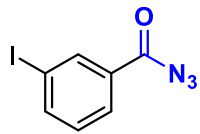

5r

<sup>1</sup>H NMR (400 MHz, CDCl<sub>3</sub>)

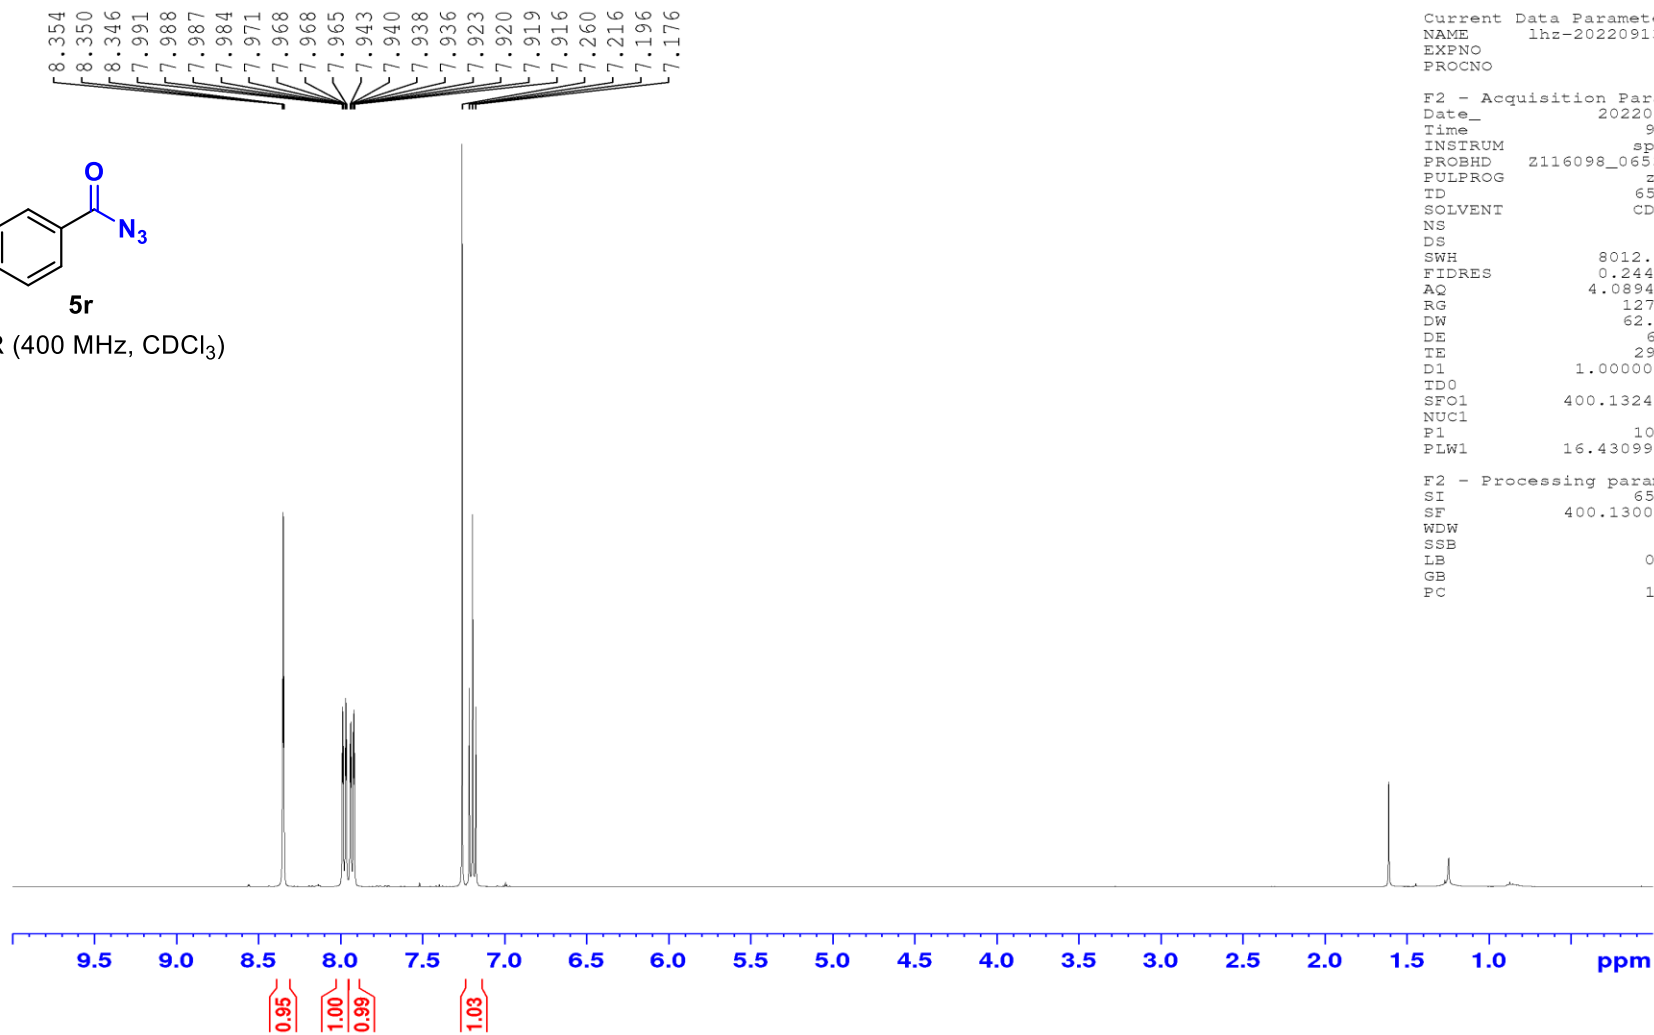

Current Data Parameters  
 NAME 1hz-20220913-1  
 EXPNO 2  
 PROCNO 1

F2 - Acquisition Parameters  
 Date\_ 20220913  
 Time 9.51 h  
 INSTRUM spect  
 PROBHD Z116098\_0653 (  
 PULPROG zg30  
 TD 65536  
 SOLVENT CDCl3  
 NS 16  
 DS 2  
 SWH 8012.820 Hz  
 FIDRES 0.244532 Hz  
 AQ 4.0894465 sec  
 RG 127.66  
 DW 62.400 usec  
 DE 6.50 usec  
 TE 294.5 K  
 D1 1.00000000 sec  
 TD0 1  
 SFO1 400.1324708 MHz  
 NUC1 1H  
 P1 10.00 usec  
 PLW1 16.43099976 W

F2 - Processing parameters  
 SI 65536  
 SF 400.1300098 MHz  
 WDW EM  
 SSB 0  
 LB 0.30 Hz  
 GB 0  
 PC 1.00

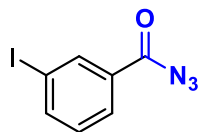

5r

<sup>13</sup>C NMR (100 MHz, CDCl<sub>3</sub>)

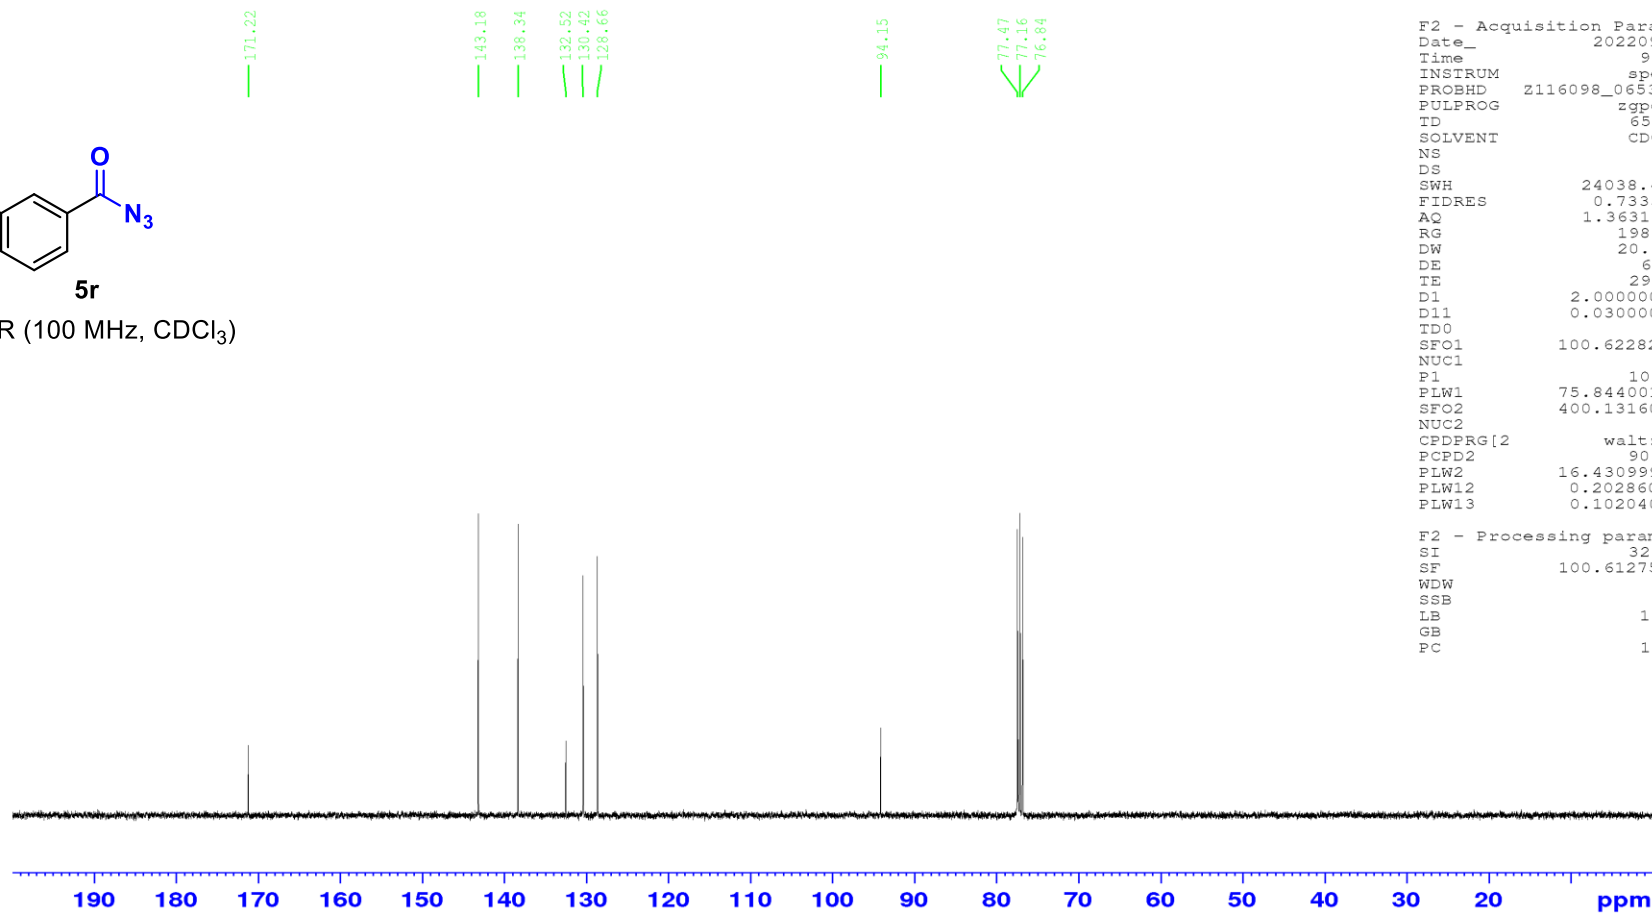

Current Data Parameters  
NAME lhz-20220913-1  
EXPNO 1  
PROCNO 1

F2 - Acquisition Parameters  
Date\_ 20220913  
Time 9.49 h  
INSTRUM spect  
PROBHD Z116098\_0653 (  
PULPROG zgpg30  
TD 65536  
SOLVENT CDCl3  
NS 88  
DS 4  
SWH 24038.461 Hz  
FIDRES 0.733596 Hz  
AQ 1.3631488 sec  
RG 198.36  
DW 20.800 usec  
DE 6.50 usec  
TE 294.6 K  
D1 2.00000000 sec  
D11 0.03000000 sec  
TD0 1  
SFO1 100.6228298 MHz  
NUC1 13C  
P1 10.00 usec  
PLW1 75.84400177 W  
SFO2 400.1316005 MHz  
NUC2 1H  
CPDPRG[2] waltz16  
PCPD2 90.00 usec  
PLW2 16.43099976 W  
PLW12 0.20286000 W  
PLW13 0.10204000 W

F2 - Processing parameters  
SI 32768  
SF 100.6127594 MHz  
WDW EM  
SSB 0  
LB 1.00 Hz  
GB 0  
PC 1.40

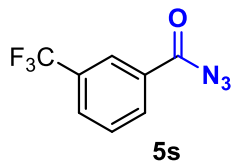

<sup>1</sup>H NMR (400 MHz, CDCl<sub>3</sub>)

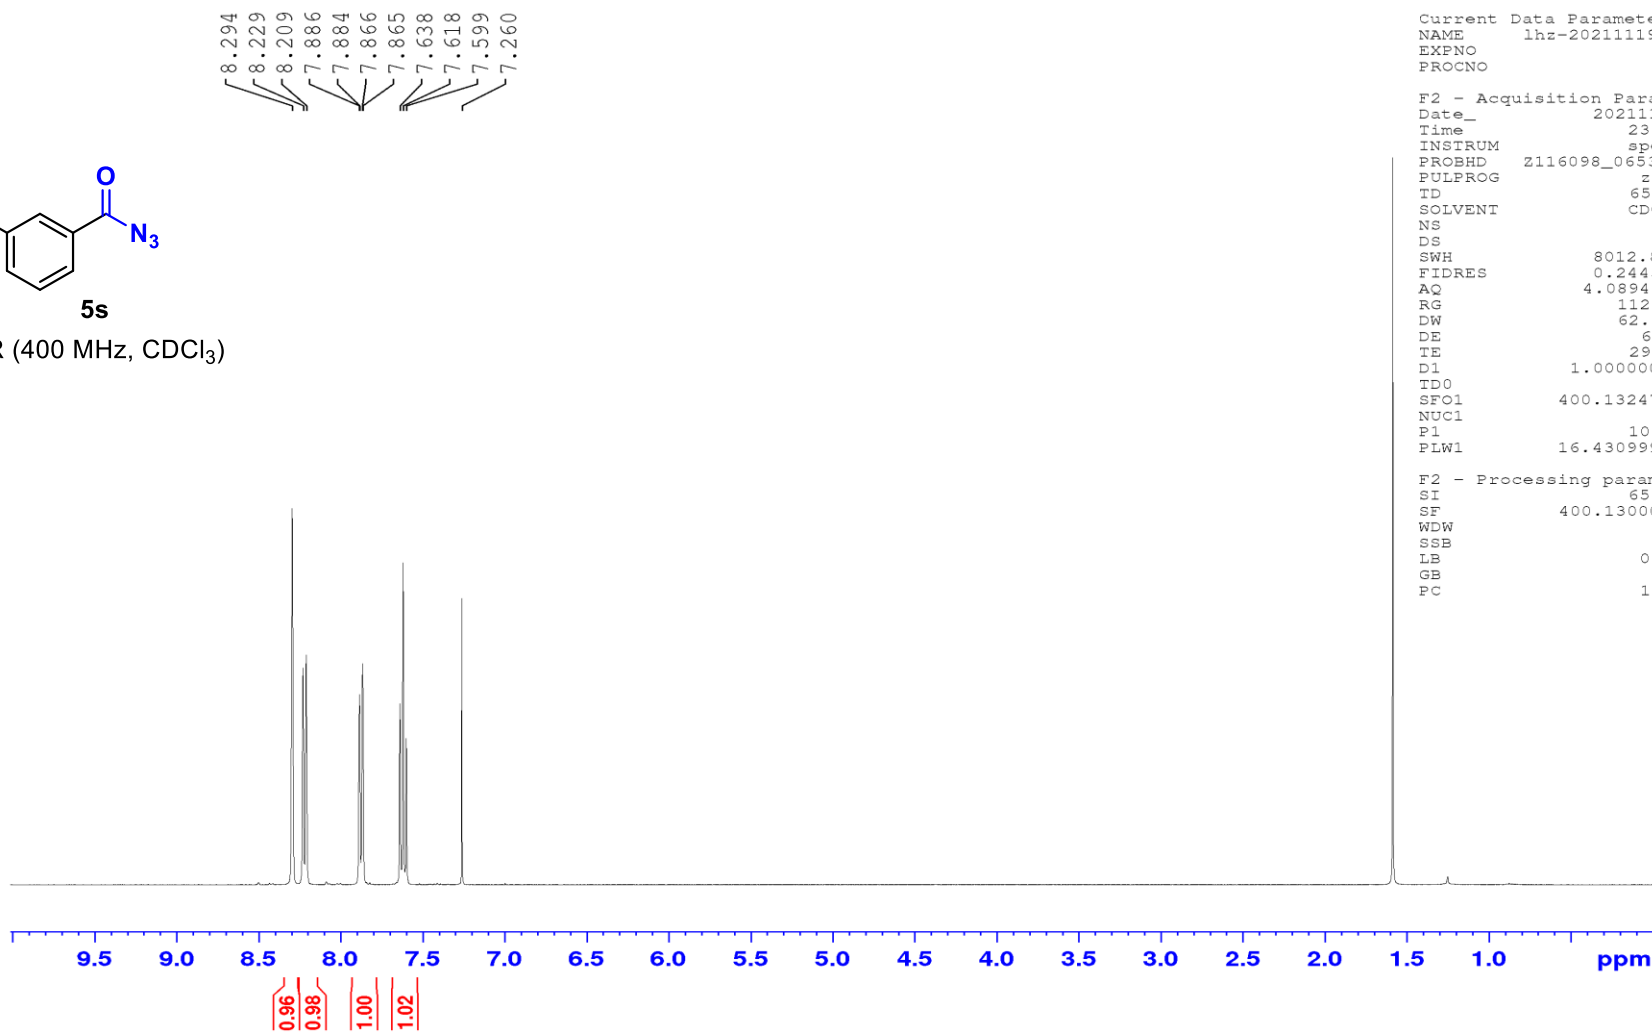

```

Current Data Parameters
NAME      lhz-20211119-5
EXPNO     1
PROCNO    1

F2 - Acquisition Parameters
Date_     20211119
Time      23.42 h
INSTRUM   spect
PROBHD    Z116098_0653 (
PULPROG   zg30
TD         65536
SOLVENT   CDCl3
NS         8
DS         2
SWH        8012.820 Hz
FIDRES     0.244532 Hz
AQ         4.0894465 sec
RG         112.15
DW         62.400 usec
DE         6.50 usec
TE         292.0 K
D1         1.00000000 sec
TD0        1
SFO1      400.1324708 MHz
NUC1       1H
P1         10.00 usec
PLW1      16.43099976 W

F2 - Processing parameters
SI         65536
SF         400.1300099 MHz
WDW        EM
SSB        0
LB         0.30 Hz
GB         0
PC         1.00
  
```

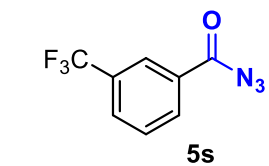

<sup>13</sup>C NMR (100 MHz, CDCl<sub>3</sub>)

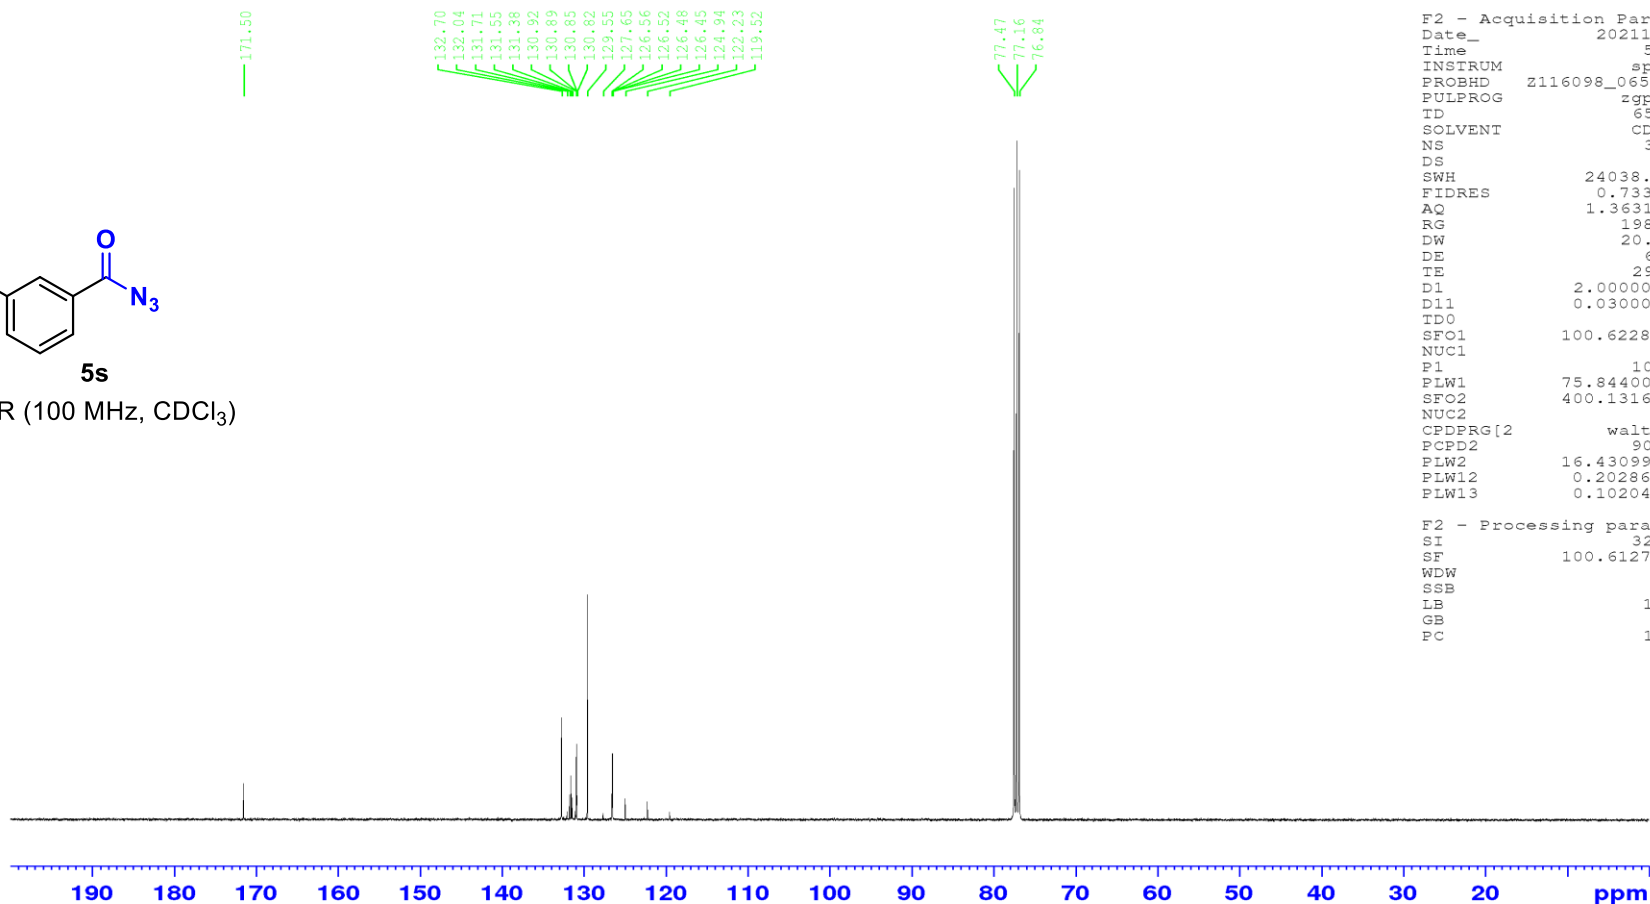

Current Data Parameters  
 NAME 1hz-20211119-5  
 EXPNO 2  
 PROCNO 1

F2 - Acquisition Parameters  
 Date\_ 20211120  
 Time 5.05 h  
 INSTRUM spect  
 PROBHD Z116098\_0653 (  
 PULPROG zgpg30  
 ID 65536  
 SOLVENT CDCl3  
 NS 3333  
 DS 4  
 SWH 24038.461 Hz  
 FIDRES 0.733596 Hz  
 AQ 1.3631488 sec  
 RG 198.36  
 DW 20.800 usec  
 DE 6.50 usec  
 TE 292.9 K  
 D1 2.00000000 sec  
 D11 0.03000000 sec  
 TD0 1  
 SFO1 100.6228298 MHz  
 NUC1 13C  
 P1 10.00 usec  
 PLW1 75.84400177 W  
 SFO2 400.1316005 MHz  
 NUC2 1H  
 CPDPRG[2] waltz16  
 PCPD2 90.00 usec  
 PLW2 16.43099976 W  
 PLW12 0.20286000 W  
 PLW13 0.10204000 W

F2 - Processing parameters  
 SI 32768  
 SF 100.6127564 MHz  
 WDW EM  
 SSB 0  
 LB 1.00 Hz  
 GB 0  
 FC 1.40

8.857  
8.852  
8.488  
8.485  
8.482  
8.479  
8.467  
8.464  
8.461  
8.459  
8.374  
8.370  
8.367  
8.354  
8.351  
8.347  
7.714  
7.693  
7.674  
7.260

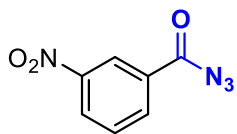

**5t**

<sup>1</sup>H NMR (400 MHz, CDCl<sub>3</sub>)

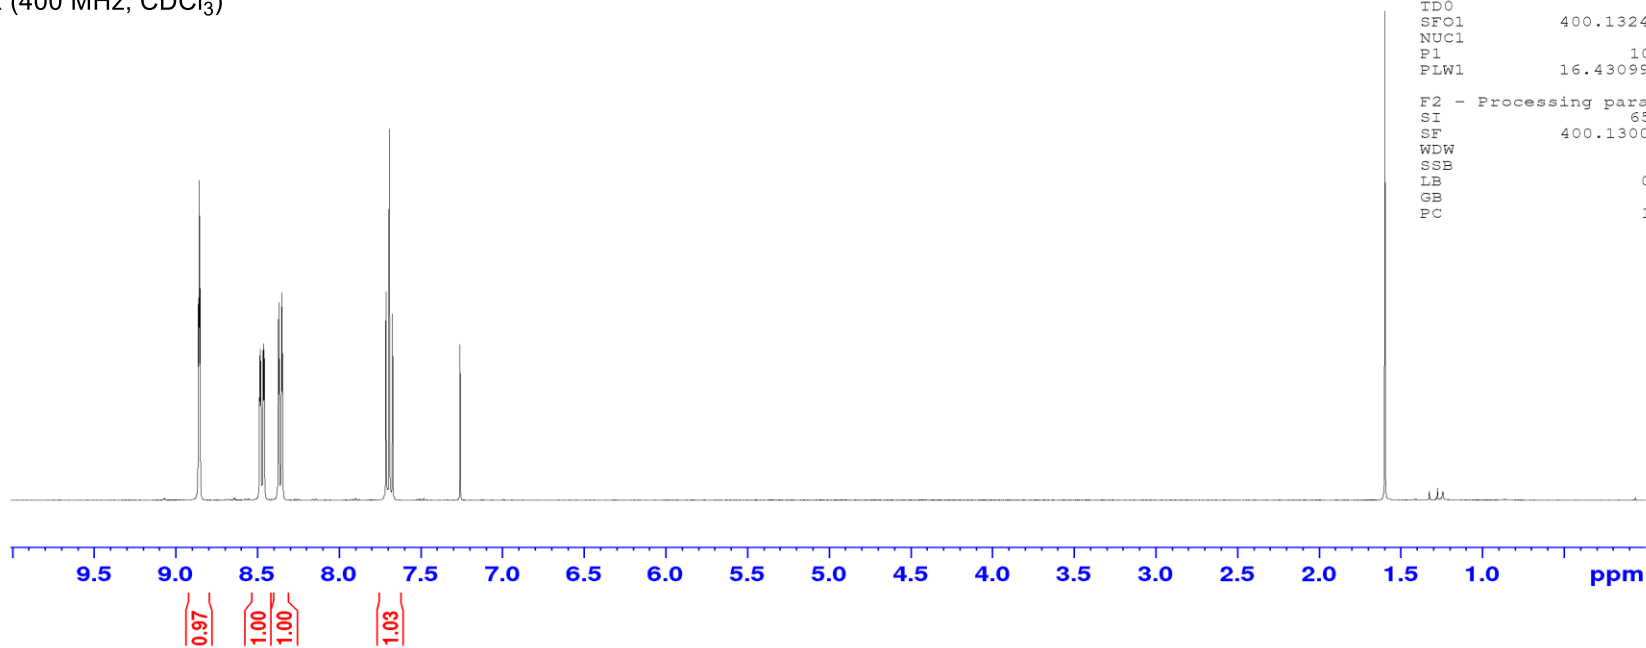

Current Data Parameters  
NAME 1hz-20211120-1  
EXPNO 1  
PROCNO 1

F2 - Acquisition Parameters  
Date\_ 20211120  
Time 23.57 h  
INSTRUM spect  
PROBHD Z116098\_0653 (  
PULPROG zg30  
TD 65536  
SOLVENT CDCl3  
NS 8  
DS 2  
SWH 8012.820 Hz  
FIDRES 0.244532 Hz  
AQ 4.0894465 sec  
RG 112.15  
DW 62.400 usec  
DE 6.50 usec  
TE 292.2 K  
D1 1.00000000 sec  
TD0 1  
SFO1 400.1324708 MHz  
NUC1 1H  
P1 10.00 usec  
PLW1 16.43099976 W

F2 - Processing parameters  
SI 65536  
SF 400.1300098 MHz  
WDW EM  
SSB 0  
LB 0.30 Hz  
GB 0  
PC 1.00

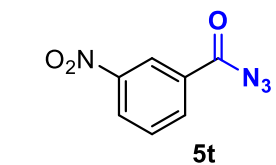

5t

<sup>13</sup>C NMR (100 MHz, CDCl<sub>3</sub>)

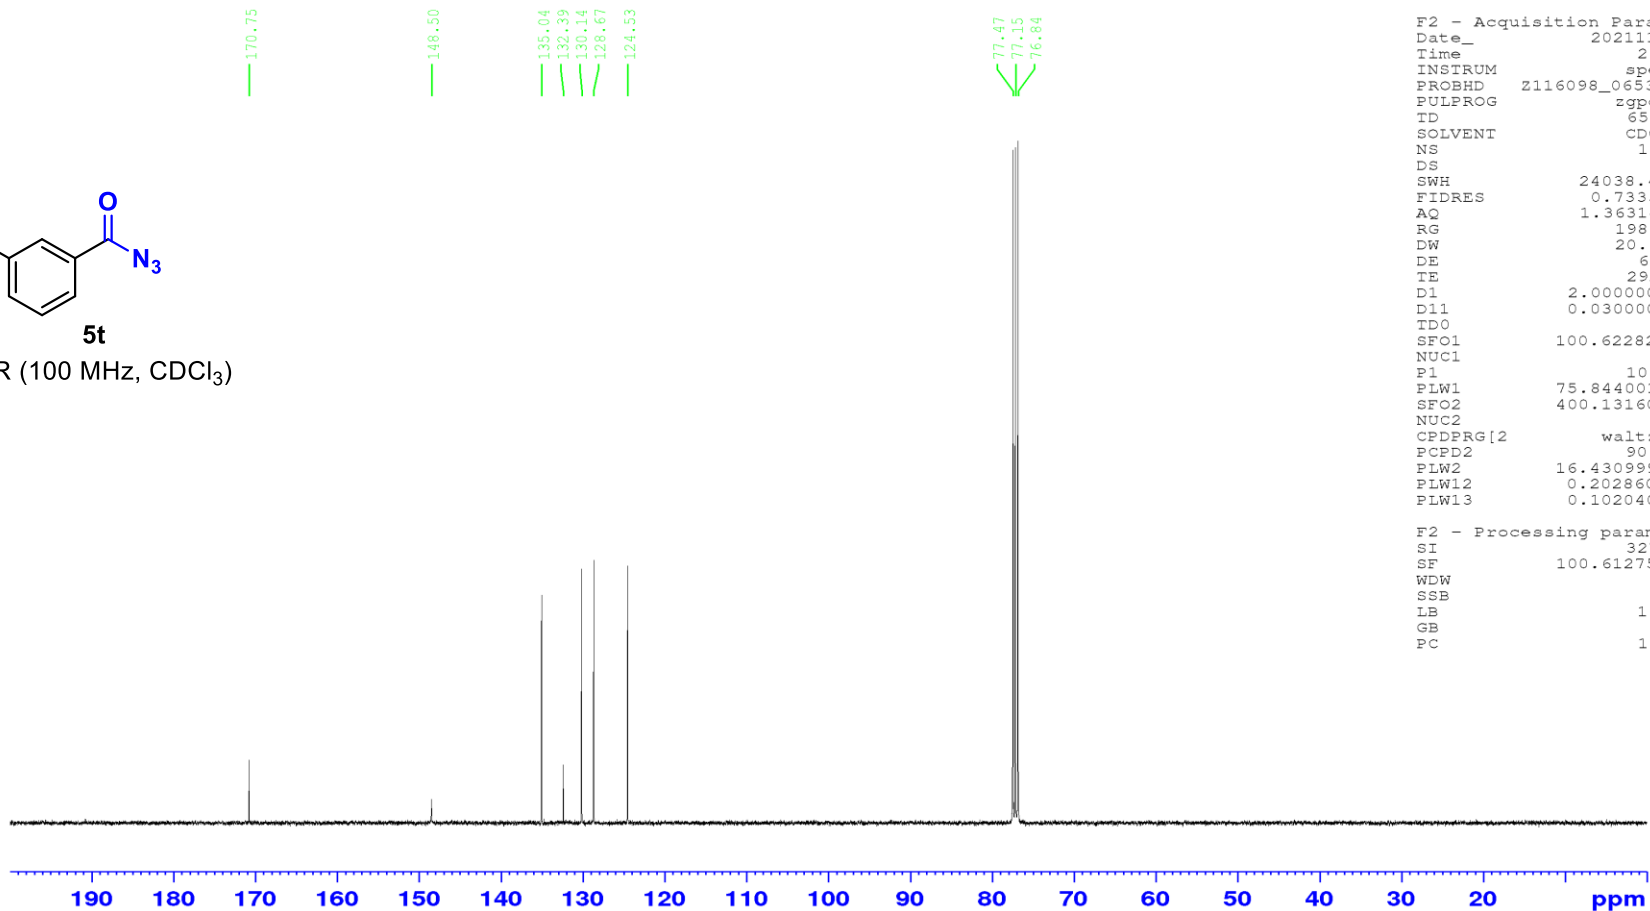

Current Data Parameters  
 NAME lhz-20211120-1  
 EXPNO 2  
 PROCNO 1

F2 - Acquisition Parameters  
 Date\_ 20211121  
 Time 2.18 h  
 INSTRUM spect  
 PROBHD Z116098\_0653 (  
 PULPROG zgpg30  
 TD 65536  
 SOLVENT CDCl3  
 NS 1024  
 DS 4  
 SWH 24038.461 Hz  
 FIDRES 0.733596 Hz  
 AQ 1.3631488 sec  
 RG 198.36  
 DW 20.800 usec  
 DE 6.50 usec  
 TE 292.9 K  
 D1 2.00000000 sec  
 D11 0.03000000 sec  
 TD0 1  
 SFO1 100.6228298 MHz  
 NUC1 13C  
 P1 10.00 usec  
 PLW1 75.84400177 W  
 SFO2 400.1316005 MHz  
 NUC2 1H  
 CPDPRG[2] waltz16  
 FCPD2 90.00 usec  
 PLW2 16.43099976 W  
 PLW12 0.20286000 W  
 PLW13 0.10204000 W

F2 - Processing parameters  
 SI 32768  
 SF 100.6127579 MHz  
 WDW EM  
 SSB 0  
 LB 1.00 Hz  
 GB 0  
 FC 1.40

7.918  
7.913  
7.611  
7.606  
7.599  
7.594  
7.592  
7.590  
7.588  
7.586  
7.580  
7.578  
7.576  
7.573  
7.572  
7.567  
7.559  
7.555  
7.260  
7.244  
7.242  
7.225  
7.223  
7.206  
7.203  
7.190  
7.188  
7.169  
7.167  
7.163  
7.160  
7.142  
7.139

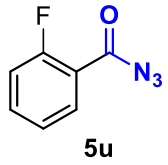

<sup>1</sup>H NMR (400 MHz, CDCl<sub>3</sub>)

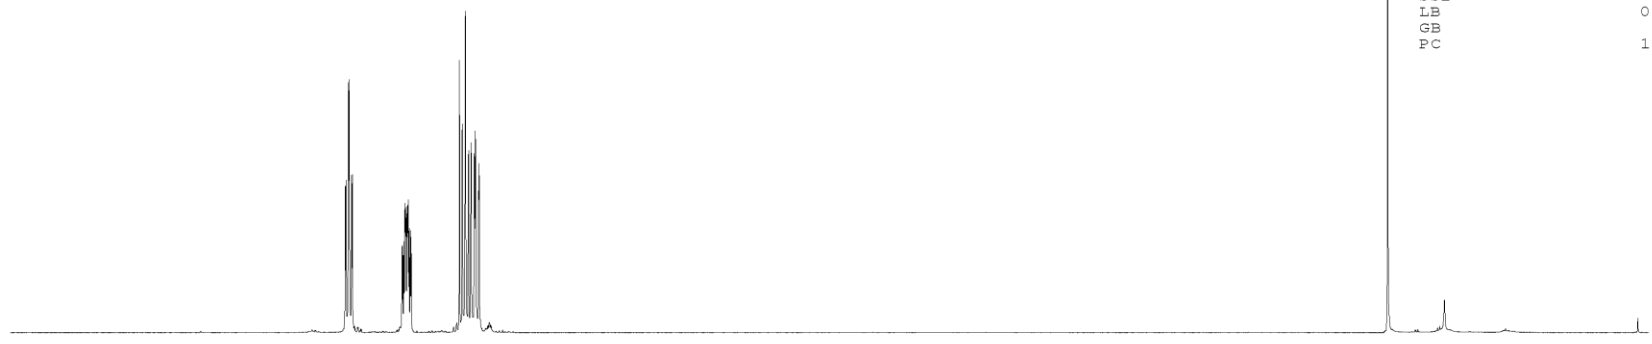

9.5 9.0 8.5 8.0 7.5 7.0 6.5 6.0 5.5 5.0 4.5 4.0 3.5 3.0 2.5 2.0 1.5 1.0 ppm

0.97  
1.00  
2.21

```

Current Data Parameters
NAME      lhz-20211118-2
EXPNO    1
PROCNO   1

F2 - Acquisition Parameters
Date_    20211118
Time     21.57 h
INSTRUM  spect
PROBHD   Z116098_0653 (
PULPROG  zg30
TD       65536
SOLVENT  CDCl3
NS       8
DS       2
SWH      8012.820 Hz
FIDRES   0.244532 Hz
AQ       4.0894465 sec
RG       112.15
DW       62.400 usec
DE       6.50 usec
TE       292.5 K
D1       1.00000000 sec
TD0      1
SFO1     400.1324708 MHz
NUC1     1H
P1       10.00 usec
PLW1     16.43099976 W

F2 - Processing parameters
SI       65536
SF       400.1300098 MHz
WDW      EM
SSB      0
LB       0.30 Hz
GB       0
PC       1.00
  
```

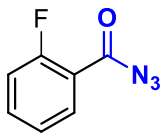

5u

<sup>13</sup>C NMR (100 MHz, CDCl<sub>3</sub>)

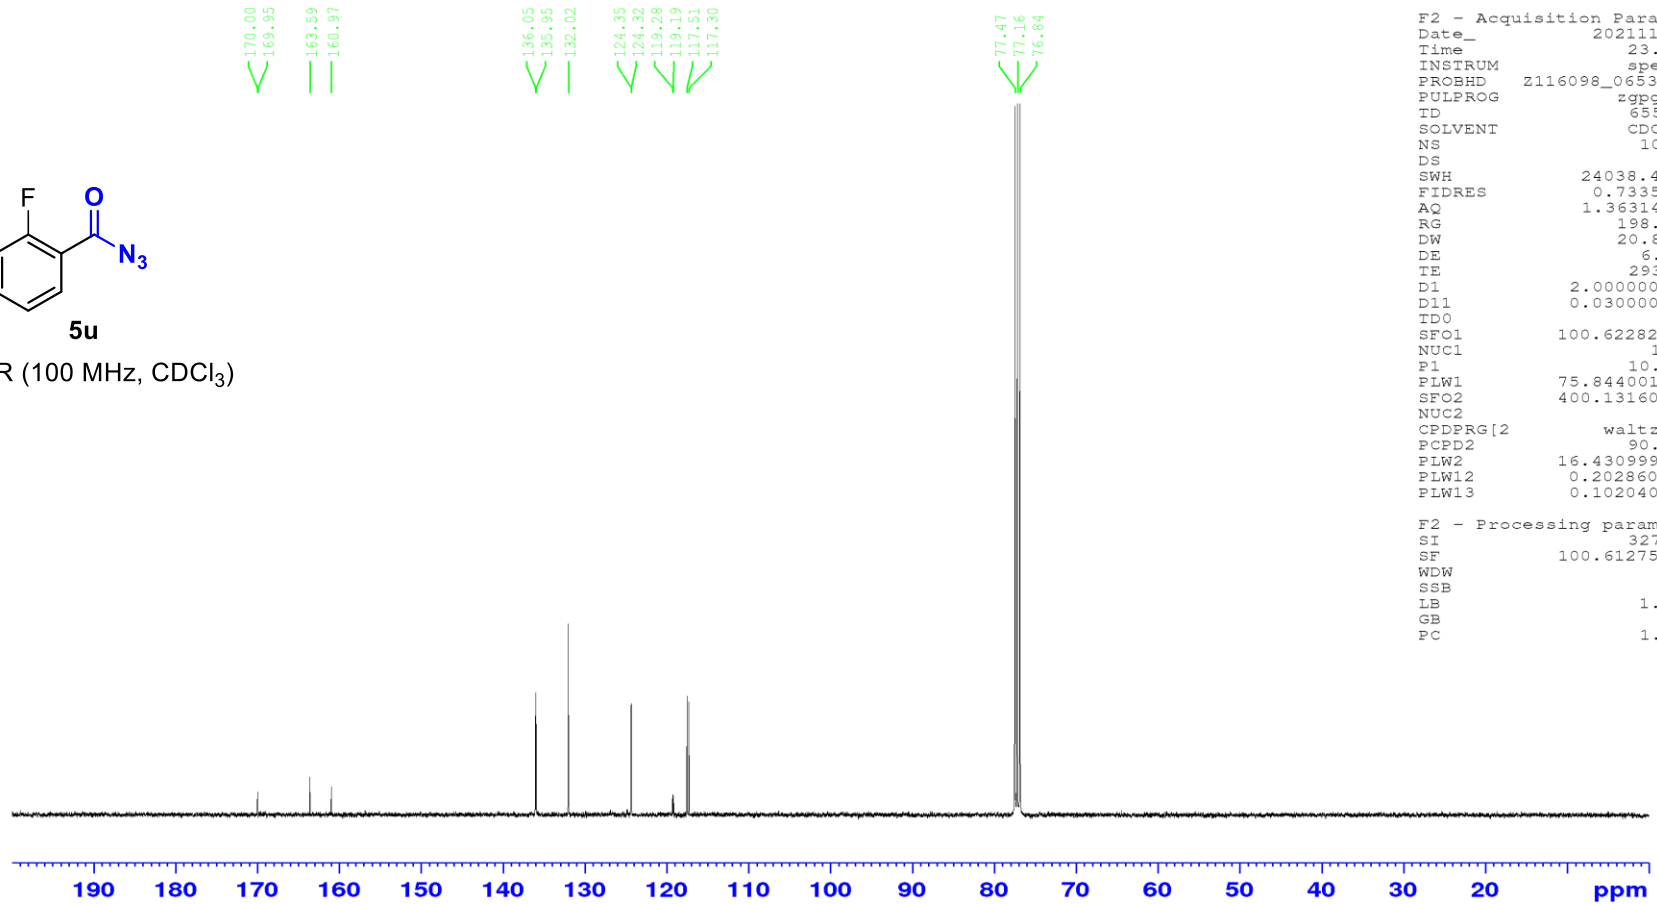

Current Data Parameters  
 NAME lhz-20211118-2  
 EXPNO 2  
 PROCNO 1

F2 - Acquisition Parameters  
 Date\_ 20211118  
 Time 23.29 h  
 INSTRUM spect  
 PROBHD Z116098\_0653  
 PULPROG zgpg30  
 TD 65536  
 SOLVENT CDCl3  
 NS 1024  
 DS 4  
 SWH 24038.461 Hz  
 FIDRES 0.733596 Hz  
 AQ 1.3631488 sec  
 RG 198.36  
 DW 20.800 usec  
 DE 6.50 usec  
 TE 293.0 K  
 D1 2.00000000 sec  
 D11 0.03000000 sec  
 TD0 1  
 SFO1 100.6228298 MHz  
 NUC1 13C  
 P1 10.00 usec  
 PLW1 75.84400177 W  
 SFO2 400.1316005 MHz  
 NUC2 1H  
 CPDPRG[2] waltz16  
 PCPD2 90.00 usec  
 PLW2 16.43099976 W  
 PLW12 0.20286000 W  
 PLW13 0.10204000 W

F2 - Processing parameters  
 SI 32768  
 SF 100.6127572 MHz  
 WDW EM  
 SSB 0  
 LB 1.00 Hz  
 GB 0  
 FC 1.40



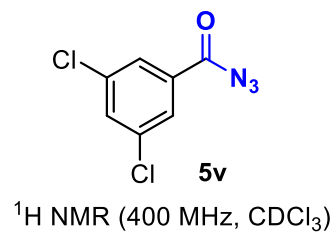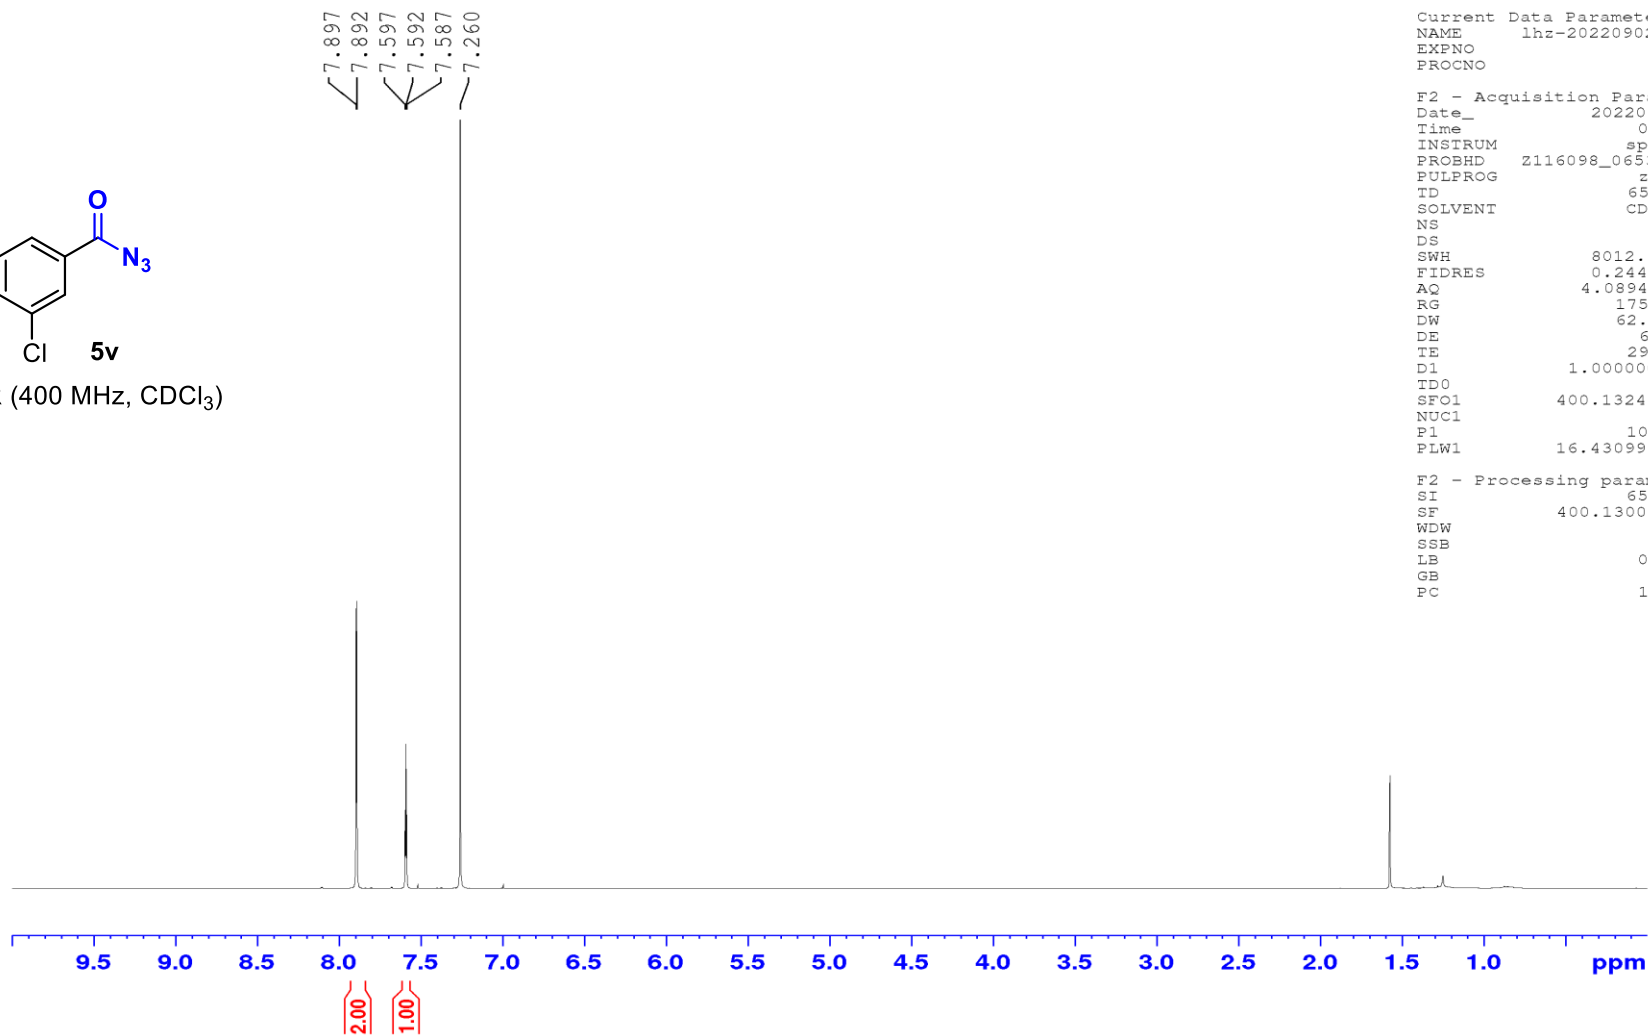

Current Data Parameters  
NAME lhz-20220902-6  
EXPNO 1  
PROCNO 1

F2 - Acquisition Parameters  
Date\_ 20220903  
Time 0.04 h  
INSTRUM spect  
PROBHD Z116098\_0653 (  
PULPROG zg30  
TD 65536  
SOLVENT CDCl3  
NS 16  
DS 2  
SWH 8012.820 Hz  
FIDRES 0.244532 Hz  
AQ 4.0894465 sec  
RG 175.57  
DW 62.400 usec  
DE 6.50 usec  
TE 294.8 K  
D1 1.00000000 sec  
TD0 1  
SFO1 400.1324708 MHz  
NUC1 1H  
P1 10.00 usec  
PLW1 16.43099976 W

F2 - Processing parameters  
SI 65536  
SF 400.1300098 MHz  
WDW EM  
SSB 0  
LB 0.30 Hz  
GB 0  
PC 1.00

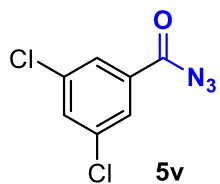

<sup>13</sup>C NMR (100 MHz, CDCl<sub>3</sub>)

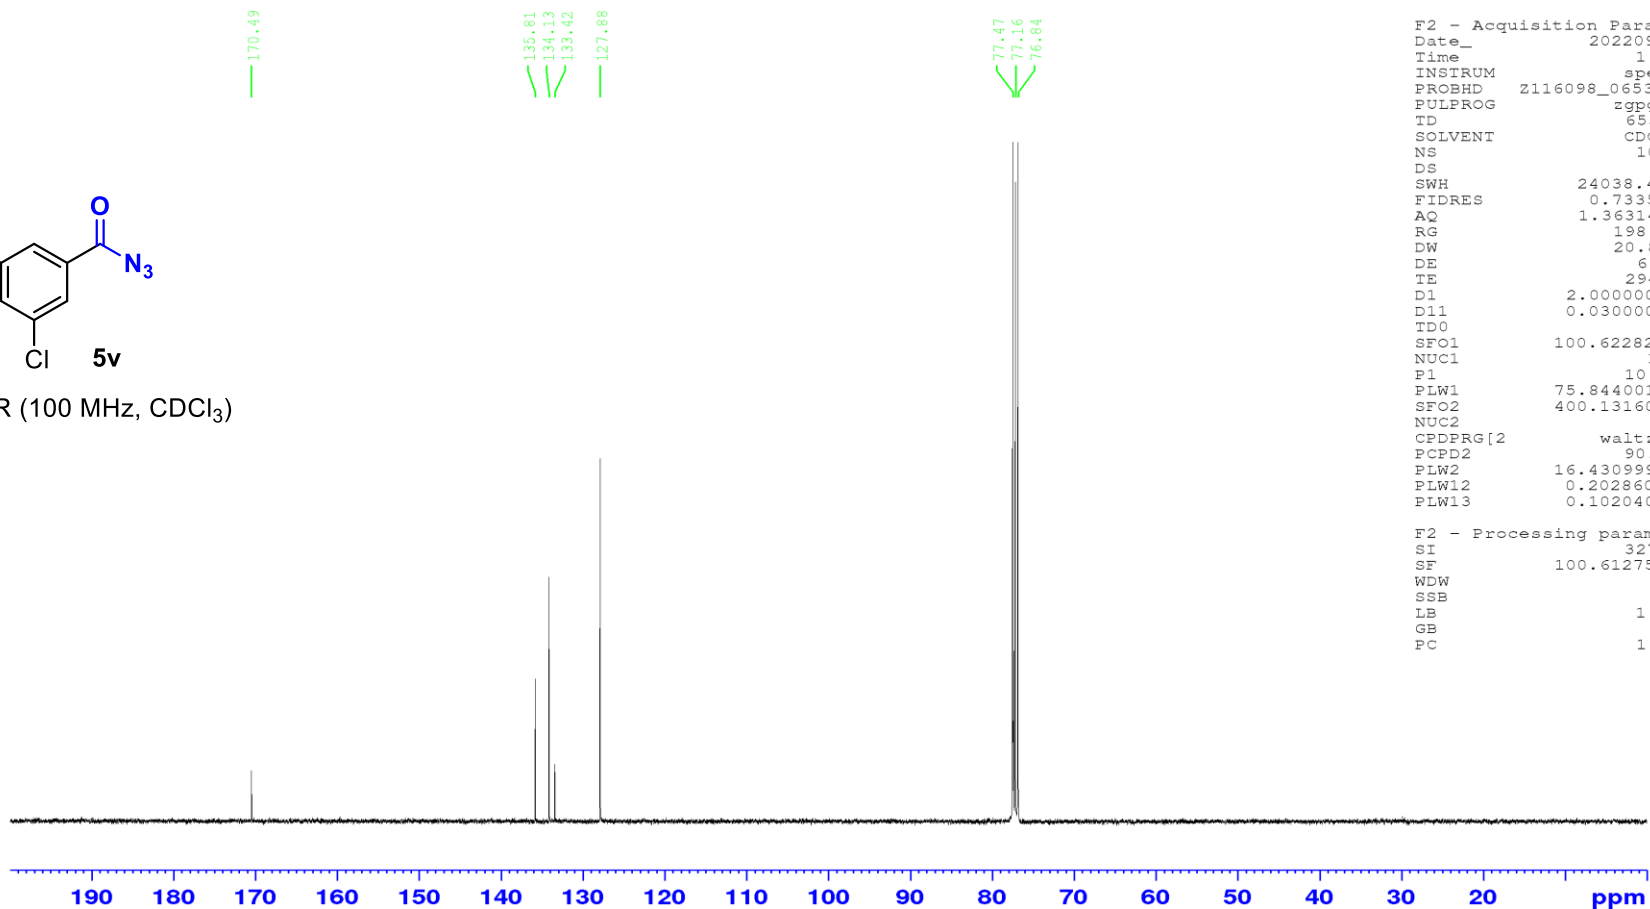

Current Data Parameters  
NAME lhz-20220902-6  
EXPNO 2  
PROCNO 1

F2 - Acquisition Parameters  
Date\_ 20220903  
Time 1.03 h  
INSTRUM spect  
PROBHD Z116098\_0653 (  
PULPROG zgpg30  
TD 65536  
SOLVENT CDCl3  
NS 1024  
DS 4  
SWH 24038.461 Hz  
FIDRES 0.733596 Hz  
AQ 1.3631488 sec  
RG 198.36  
DW 20.800 usec  
DE 6.50 usec  
TE 294.9 K  
D1 2.00000000 sec  
D11 0.03000000 sec  
TD0 1  
SFO1 100.6228298 MHz  
NUC1 13C  
P1 10.00 usec  
PLW1 75.84400177 W  
SFO2 400.1316005 MHz  
NUC2 1H  
CPDPRG[2] waltz16  
PCPD2 90.00 usec  
PLW2 16.43099976 W  
PLW12 0.20286000 W  
PLW13 0.10204000 W

F2 - Processing parameters  
SI 32768  
SF 100.6127561 MHz  
WDW EM  
SSB 0  
LB 1.00 Hz  
GB 0  
PC 1.40

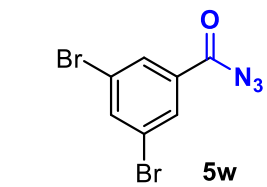

<sup>1</sup>H NMR (400 MHz, CDCl<sub>3</sub>)

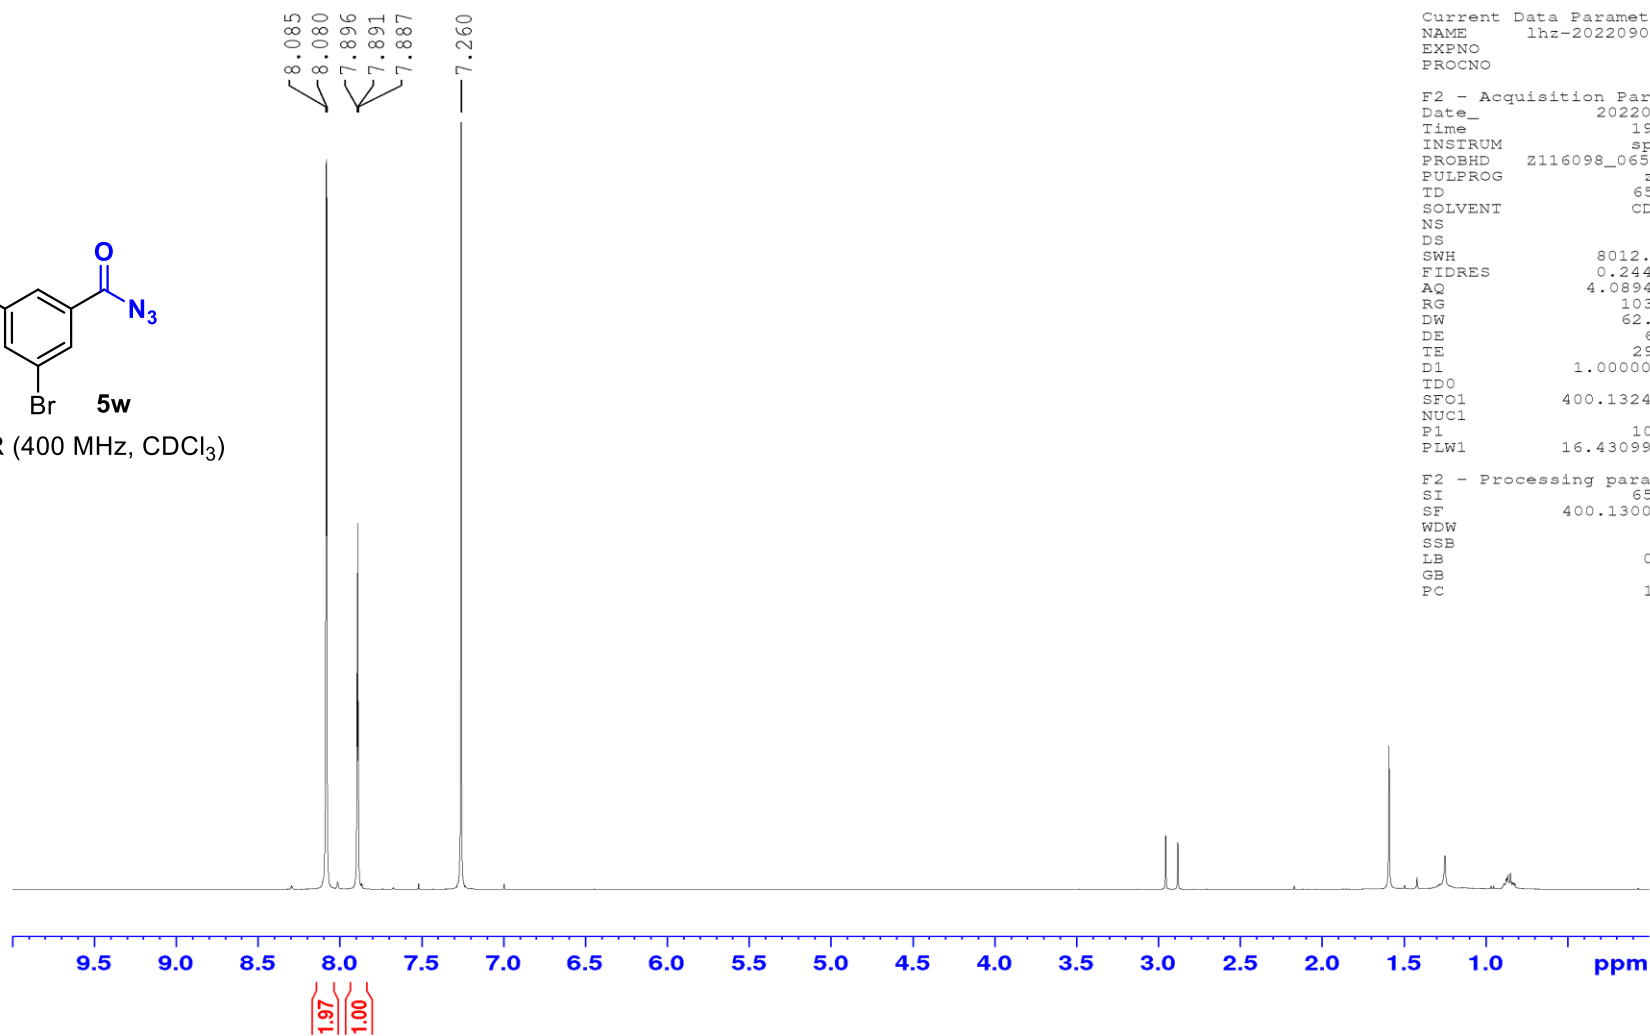

Current Data Parameters  
NAME 1hz-20220907-1  
EXPNO 1  
PROCNO 1

F2 - Acquisition Parameters  
Date\_ 20220907  
Time 19.45 h  
INSTRUM spect  
PROBHD Z116098\_0653 (  
PULPROG zg30  
TD 65536  
SOLVENT CDCl3  
NS 8  
DS 2  
SWH 8012.820 Hz  
FIDRES 0.244532 Hz  
AQ 4.0894465 sec  
RG 103.14  
DW 62.400 usec  
DE 6.50 usec  
TE 293.9 K  
D1 1.00000000 sec  
TD0 1  
SFO1 400.1324708 MHz  
NUC1 1H  
P1 10.00 usec  
PLW1 16.43099976 W

F2 - Processing parameters  
SI 65536  
SF 400.1300098 MHz  
WDW EM  
SSB 0  
LB 0.30 Hz  
GB 0  
PC 1.00

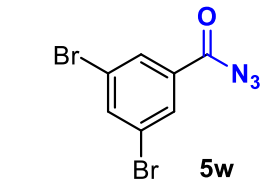

<sup>13</sup>C NMR (100 MHz, CDCl<sub>3</sub>)

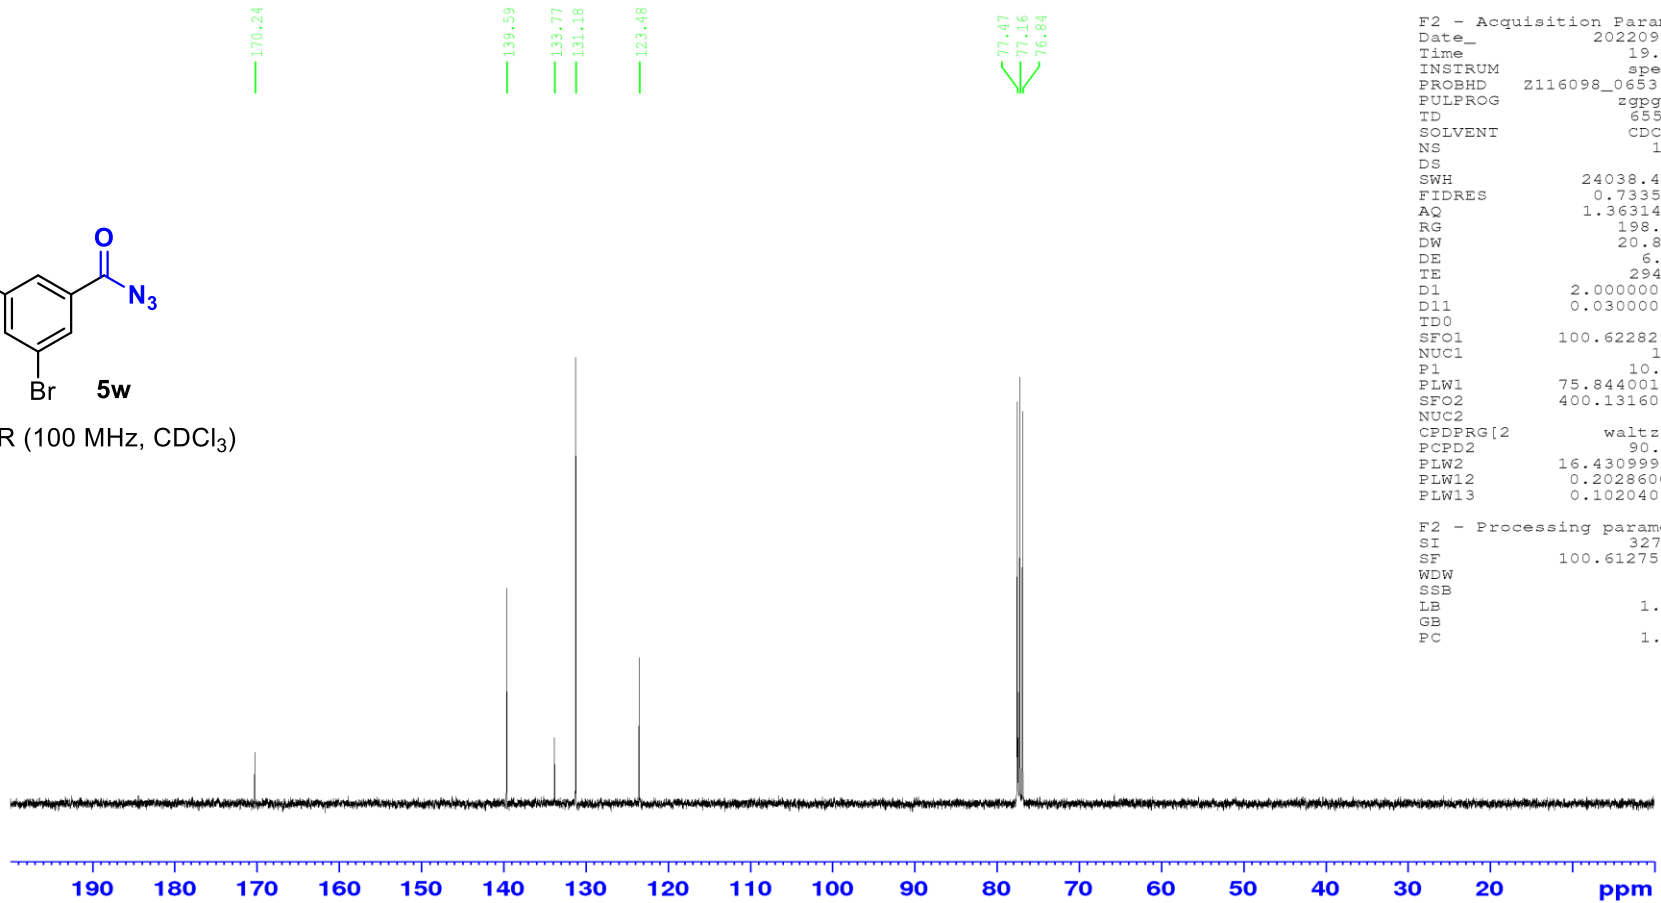

Current Data Parameters  
NAME lhz-20220907-1  
EXPNO 2  
PROCNO 1

F2 - Acquisition Parameters  
Date\_ 20220907  
Time 19.52 h  
INSTRUM spect  
PROBHD Z116098\_0653 (  
PULPROG zgpg30  
TD 65536  
SOLVENT CDCl3  
NS 108  
DS 4  
SWH 24038.461 Hz  
FIDRES 0.733596 Hz  
AQ 1.3631488 sec  
RG 198.36  
DW 20.800 usec  
DE 6.50 usec  
TE 294.5 K  
D1 2.00000000 sec  
D11 0.03000000 sec  
TD0 1  
SFO1 100.6228298 MHz  
NUC1 13C  
P1 10.00 usec  
PLW1 75.84400177 W  
SFO2 400.1316005 MHz  
NUC2 1H  
CPDPRG[2] waltz16  
PCPD2 90.00 usec  
PLW2 16.43099976 W  
PLW12 0.20286000 W  
PLW13 0.10204000 W

F2 - Processing parameters  
SI 32768  
SF 100.6127571 MHz  
WDW EM  
SSB 0  
LB 1.00 Hz  
GB 0  
PC 1.40

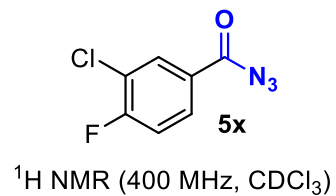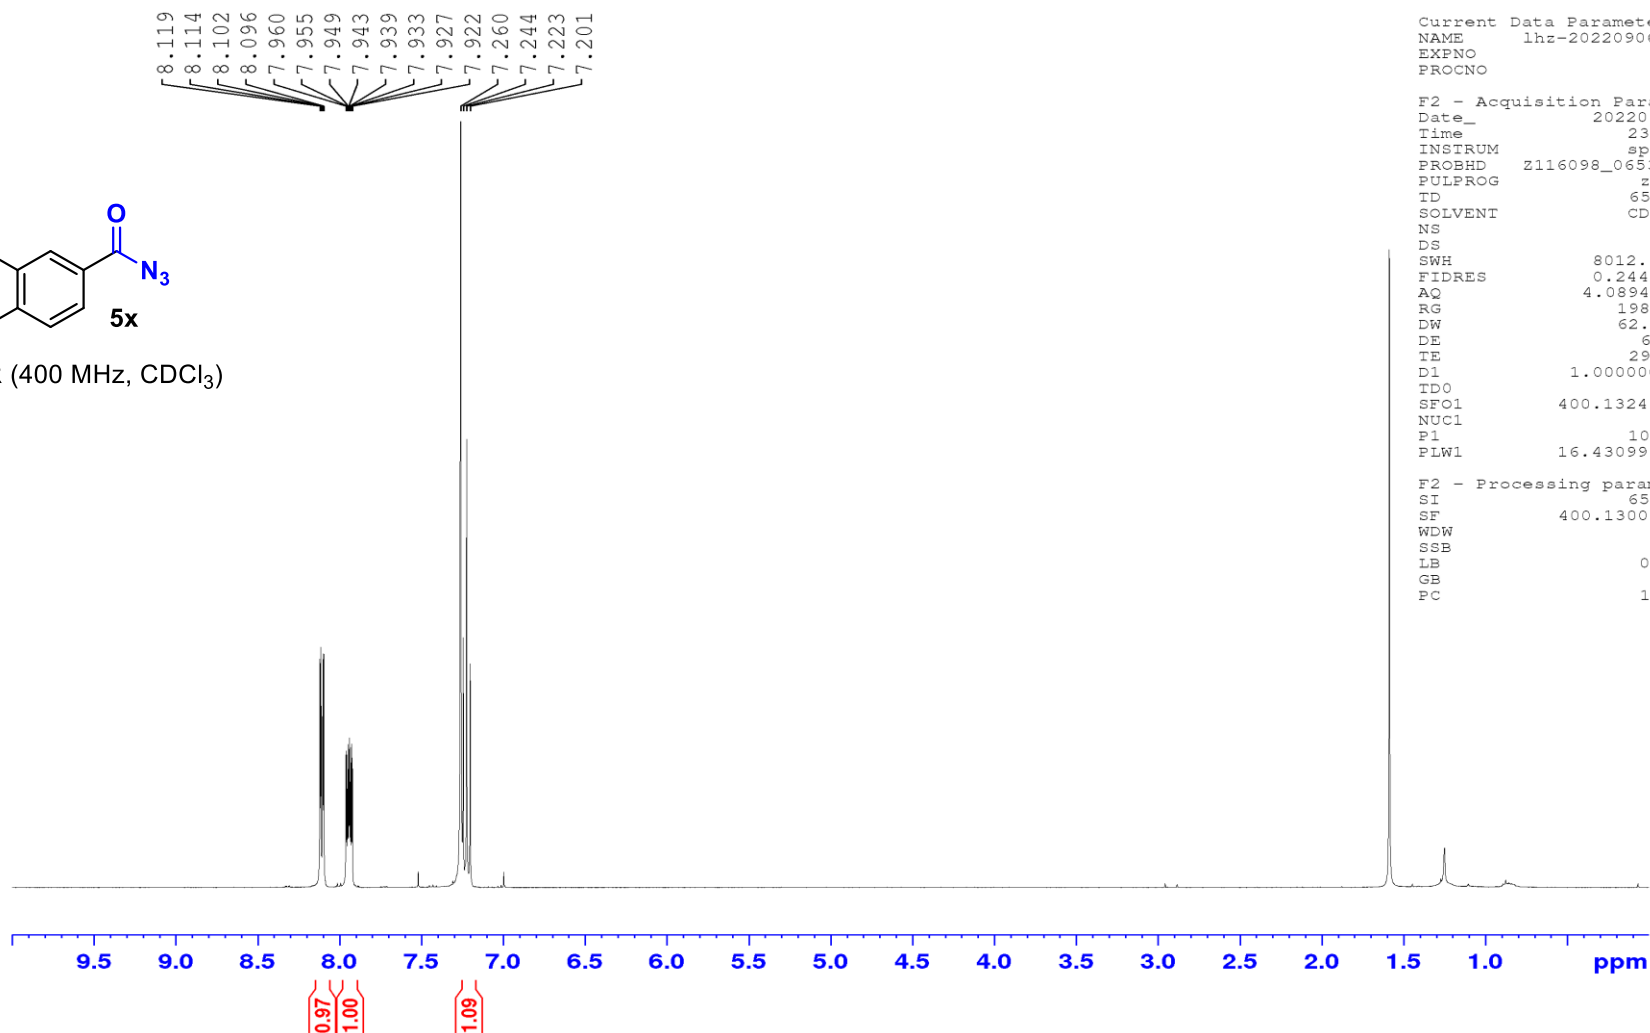

Current Data Parameters  
 NAME lhz-20220906-3  
 EXPNO 1  
 PROCNO 1

F2 - Acquisition Parameters  
 Date\_ 20220906  
 Time 23.31 h  
 INSTRUM spect  
 PROBHD Z116098\_0653 (  
 PULPROG zg30  
 TD 65536  
 SOLVENT CDCl3  
 NS 8  
 DS 2  
 SWH 8012.820 Hz  
 FIDRES 0.244532 Hz  
 AQ 4.0894465 sec  
 RG 198.36  
 DW 62.400 usec  
 DE 6.50 usec  
 TE 294.3 K  
 D1 1.00000000 sec  
 TD0 1  
 SFO1 400.1324708 MHz  
 NUC1 1H  
 P1 10.00 usec  
 PLW1 16.43099976 W

F2 - Processing parameters  
 SI 65536  
 SF 400.1300098 MHz  
 WDW EM  
 SSB 0  
 LB 0.30 Hz  
 GB 0  
 FC 1.00

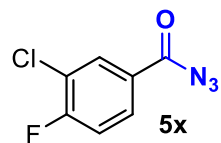

<sup>13</sup>C NMR (100 MHz, CDCl<sub>3</sub>)

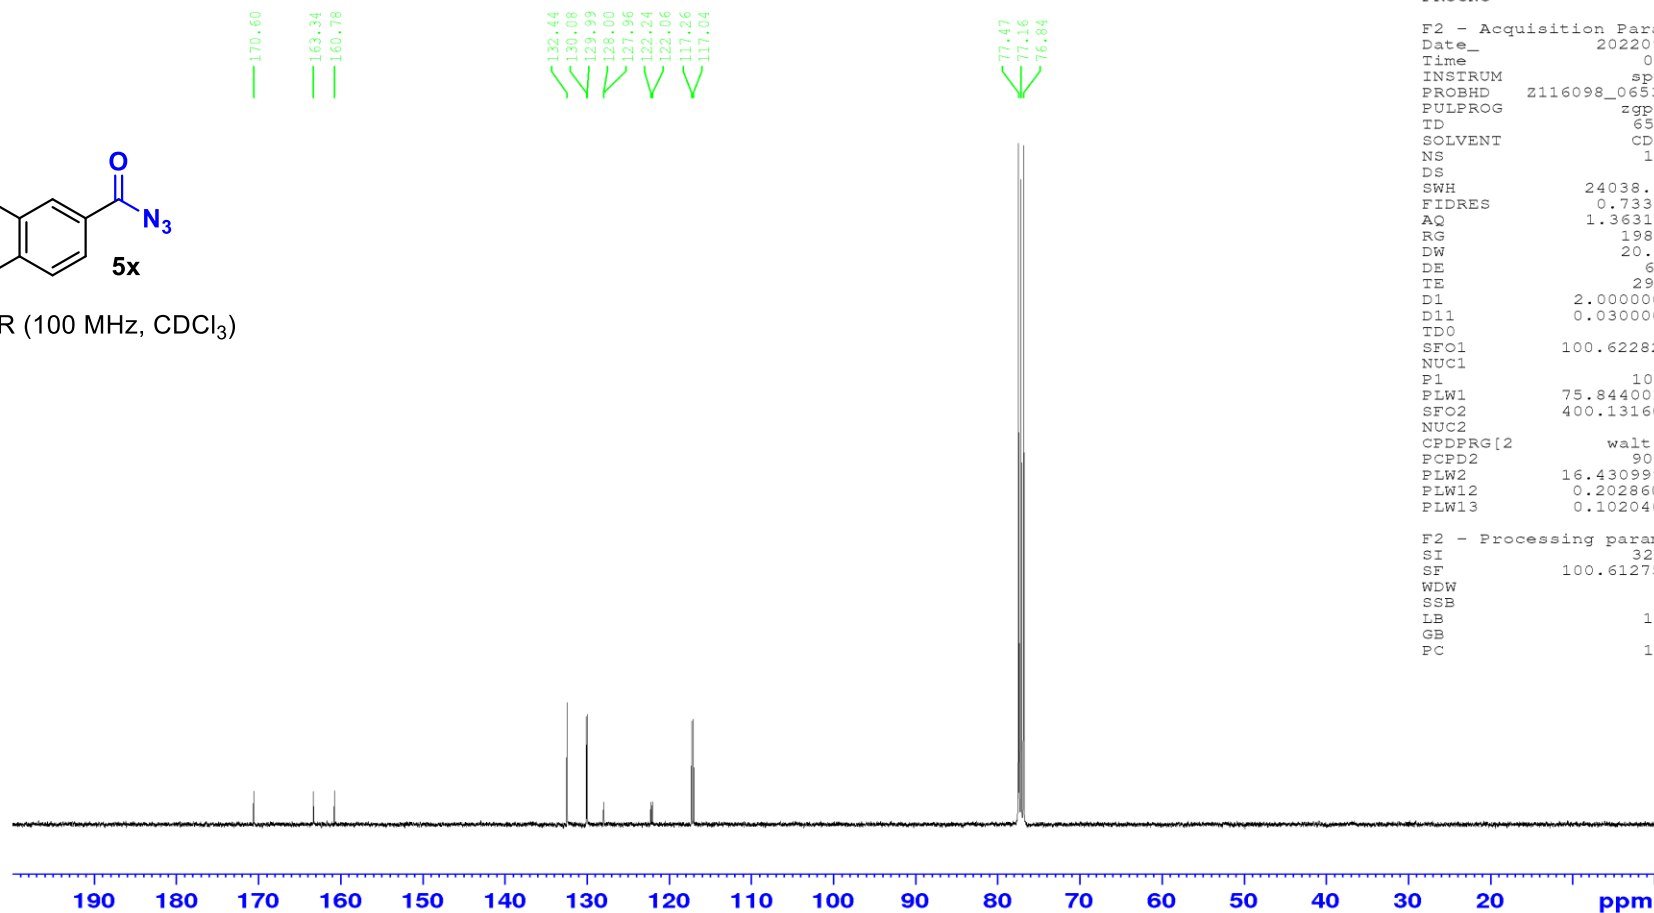

Current Data Parameters  
 NAME 1hz-20220906-3  
 EXPNO 2  
 PROCNO 1

F2 - Acquisition Parameters  
 Date\_ 20220907  
 Time 0.48 h  
 INSTRUM spect  
 PROBHD Z116098\_0653 (  
 PULPROG zgpg30  
 TD 65536  
 SOLVENT CDCl3  
 NS 1333  
 DS 4  
 SWH 24038.461 Hz  
 FIDRES 0.733596 Hz  
 AQ 1.3631488 sec  
 RG 198.36  
 DW 20.800 usec  
 DE 6.50 usec  
 TE 295.1 K  
 D1 2.00000000 sec  
 D11 0.03000000 sec  
 TD0 1  
 SFO1 100.6228298 MHz  
 NUC1 13C  
 P1 10.00 usec  
 PLW1 75.84400177 W  
 SFO2 400.1316005 MHz  
 NUC2 1H  
 CPDPRG[2] waltz16  
 PCPD2 90.00 usec  
 PLW2 16.43099976 W  
 PLW12 0.20286000 W  
 PLW13 0.10204000 W

F2 - Processing parameters  
 SI 32768  
 SF 100.6127561 MHz  
 WDW EM  
 SSB 0  
 LB 1.00 Hz  
 GB 0  
 PC 1.40

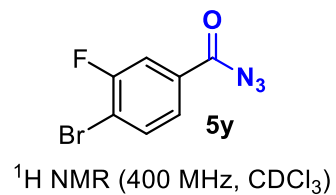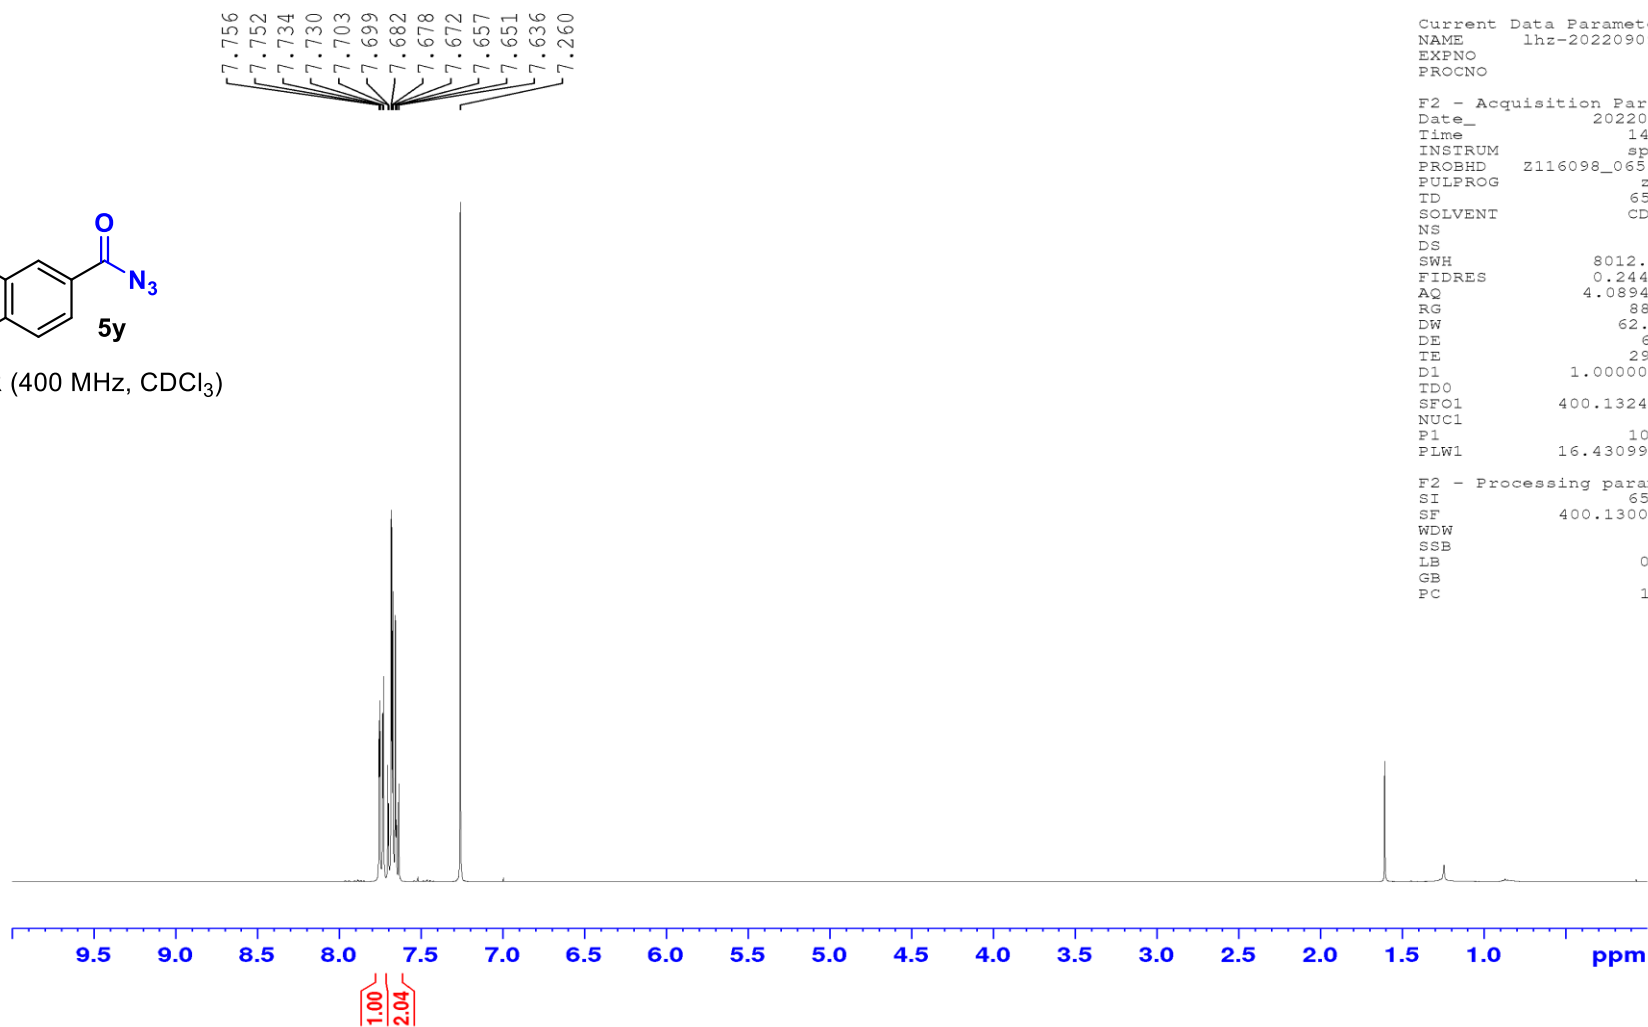

```

Current Data Parameters
NAME      lhz-20220909-2
EXPNO     1
PROCNO    1

F2 - Acquisition Parameters
Date_     20220909
Time      14.28 h
INSTRUM   spect
PROBHD    Z116098_0653 (
PULPROG   zg30
TD         65536
SOLVENT   CDCl3
NS         8
DS         2
SWH        8012.820 Hz
FIDRES     0.244532 Hz
AQ         4.0894465 sec
RG         88.22
DW         62.400 usec
DE         6.50 usec
TE         294.4 K
D1         1.00000000 sec
TD0        1
SFO1      400.1324708 MHz
NUC1       1H
P1         10.00 usec
PLW1      16.43099976 W

F2 - Processing parameters
SI         65536
SF         400.1300098 MHz
WDW        EM
SSB        0
LB         0.30 Hz
GB         0
PC         1.00
  
```

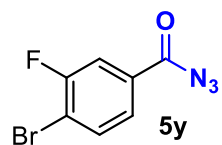

5y

<sup>13</sup>C NMR (100 MHz, CDCl<sub>3</sub>)

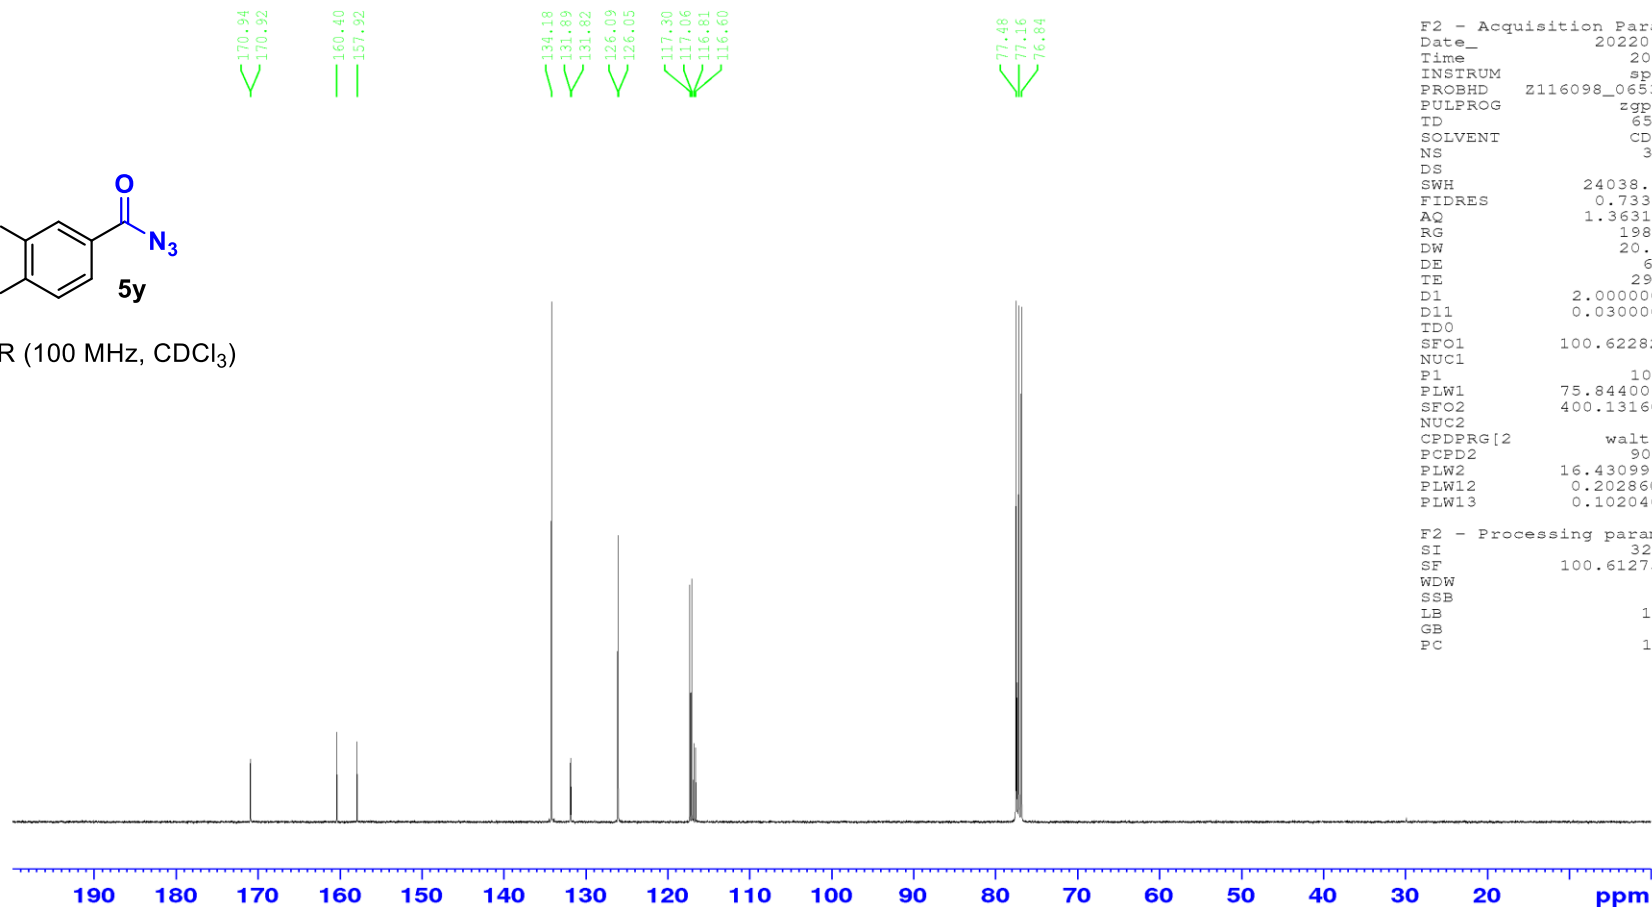

Current Data Parameters  
 NAME lhz-20220909-2  
 EXPNO 2  
 PROCNO 1

F2 - Acquisition Parameters  
 Date\_ 20220909  
 Time 20.58 h  
 INSTRUM spect  
 PROBHD Z116098\_0653 (  
 PULPROG zgpg30  
 TD 65536  
 SOLVENT CDCl3  
 NS 3333  
 DS 4  
 SWH 24038.461 Hz  
 FIDRES 0.733596 Hz  
 AQ 1.3631488 sec  
 RG 198.36  
 DW 20.800 usec  
 DE 6.50 usec  
 TE 294.7 K  
 D1 2.00000000 sec  
 D11 0.03000000 sec  
 TD0 1  
 SFO1 100.6228298 MHz  
 NUC1 13C  
 P1 10.00 usec  
 PLW1 75.84400177 W  
 SFO2 400.1316005 MHz  
 NUC2 1H  
 CPDPRG[2] waltz16  
 PCPD2 90.00 usec  
 PLW2 16.43099976 W  
 PLW12 0.20286000 W  
 PLW13 0.10204000 W

F2 - Processing parameters  
 SI 32768  
 SF 100.6127572 MHz  
 WDW EM  
 SSB 0  
 LB 1.00 Hz  
 GB 0  
 FC 1.40



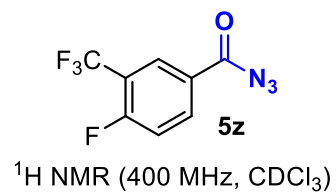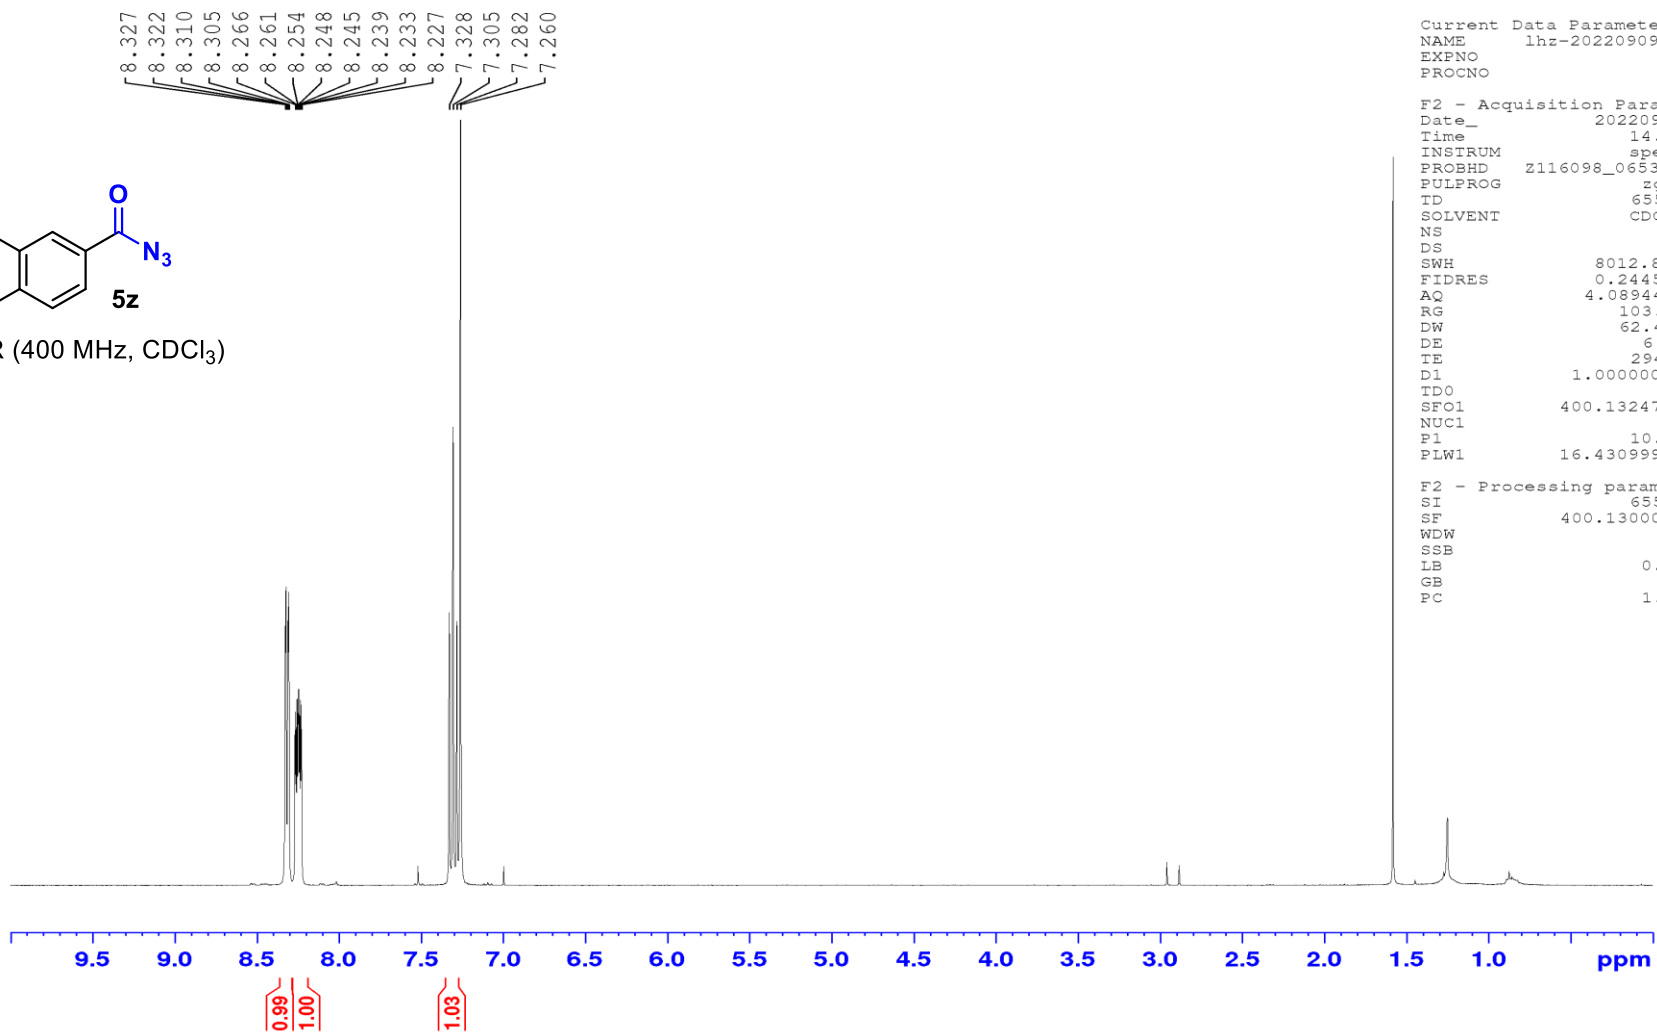

Current Data Parameters  
 NAME lhz-20220909-3  
 EXPNO 1  
 PROCNO 1

F2 - Acquisition Parameters  
 Date\_ 20220909  
 Time 14.32 h  
 INSTRUM spect  
 PROBHD Z116098\_0653 (  
 PULPROG zg30  
 TD 65536  
 SOLVENT CDCl3  
 NS 8  
 DS 2  
 SWH 8012.820 Hz  
 FIDRES 0.244532 Hz  
 AQ 4.0894465 sec  
 RG 103.14  
 DW 62.400 usec  
 DE 6.50 usec  
 TE 294.2 K  
 D1 1.00000000 sec  
 TD0 1  
 SFO1 400.1324708 MHz  
 NUC1 1H  
 P1 10.00 usec  
 PLW1 16.43099976 W

F2 - Processing parameters  
 SI 65536  
 SF 400.1300099 MHz  
 WDW EM  
 SSB 0  
 LB 0.30 Hz  
 GB 0  
 PC 1.00

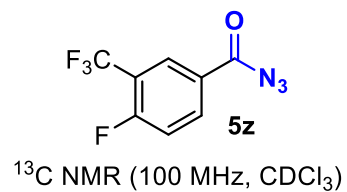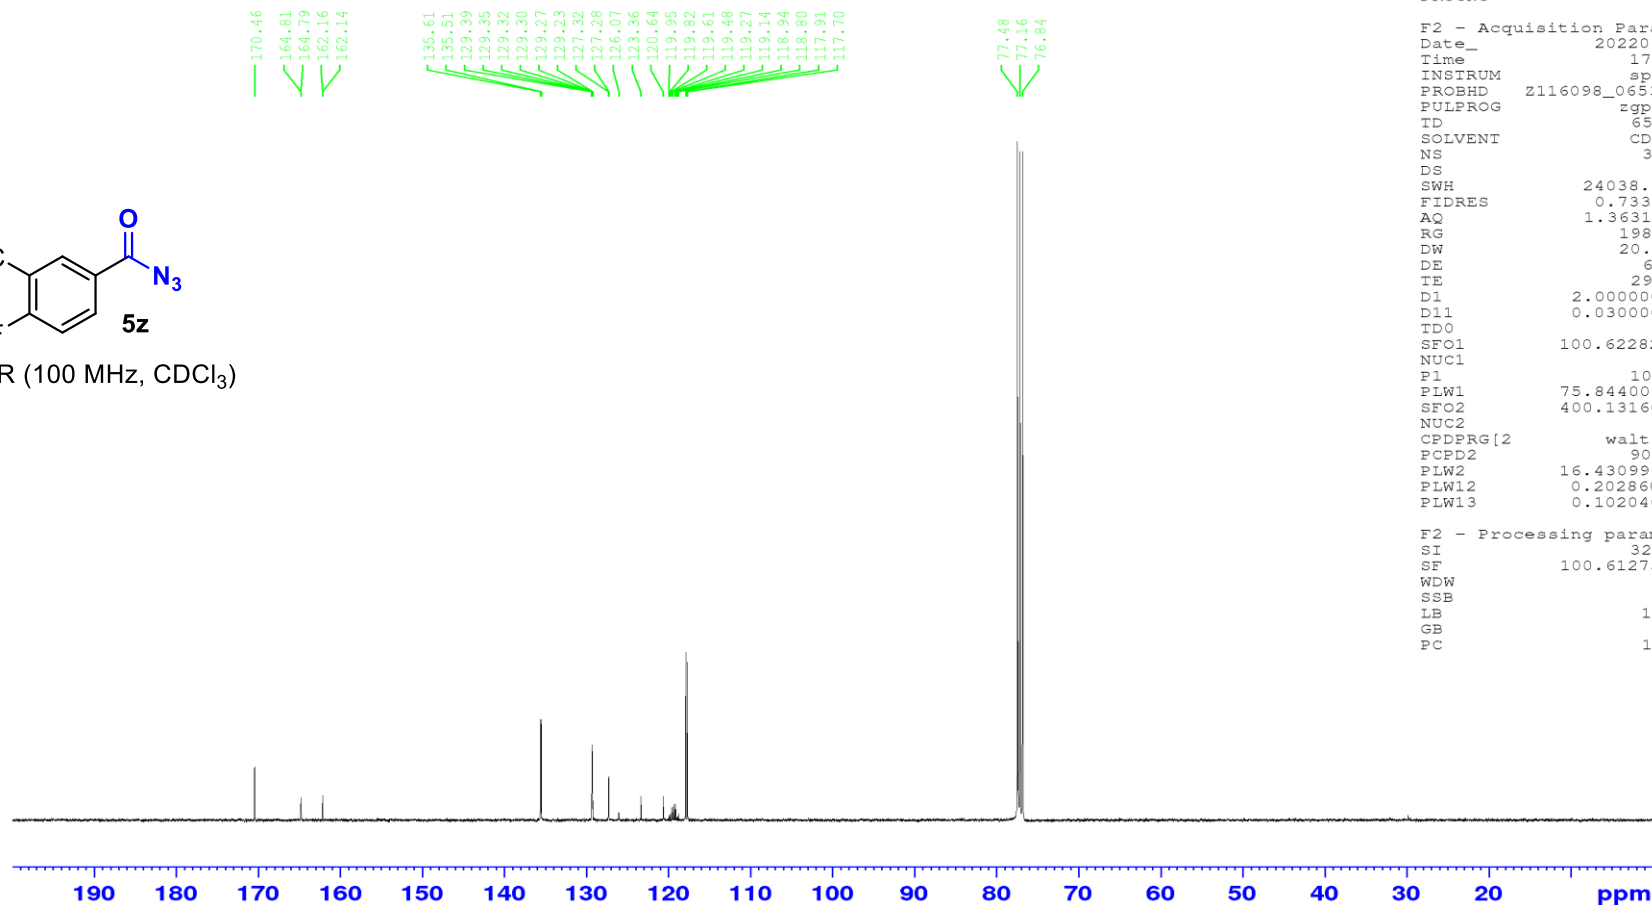

Current Data Parameters  
 NAME lhz-20220909-3  
 EXPNO 2  
 PROCNO 1

F2 - Acquisition Parameters  
 Date\_ 20220909  
 Time 17.43 h  
 INSTRUM spect  
 PROBHD Z116098\_0653  
 PULPROG zgpg30  
 TD 65536  
 SOLVENT CDCl3  
 NS 3333  
 DS 4  
 SWH 24038.461 Hz  
 FIDRES 0.733596 Hz  
 AQ 1.3631488 sec  
 RG 198.36  
 DW 20.800 usec  
 DE 6.50 usec  
 TE 294.8 K  
 D1 2.00000000 sec  
 D11 0.03000000 sec  
 TD0 1  
 SFO1 100.6228298 MHz  
 NUC1 13c  
 P1 10.00 usec  
 PLW1 75.84400177 W  
 SFO2 400.1316005 MHz  
 NUC2 1H  
 CPDPRG[2] waltz16  
 FCPD2 90.00 usec  
 PLW2 16.43099976 W  
 PLW12 0.20286000 W  
 PLW13 0.10204000 W

F2 - Processing parameters  
 SI 32768  
 SF 100.6127550 MHz  
 WDW EM  
 SSB 0  
 LB 1.00 Hz  
 GB 0  
 PC 1.40

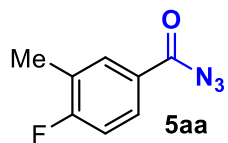

<sup>1</sup>H NMR (400 MHz, CDCl<sub>3</sub>)

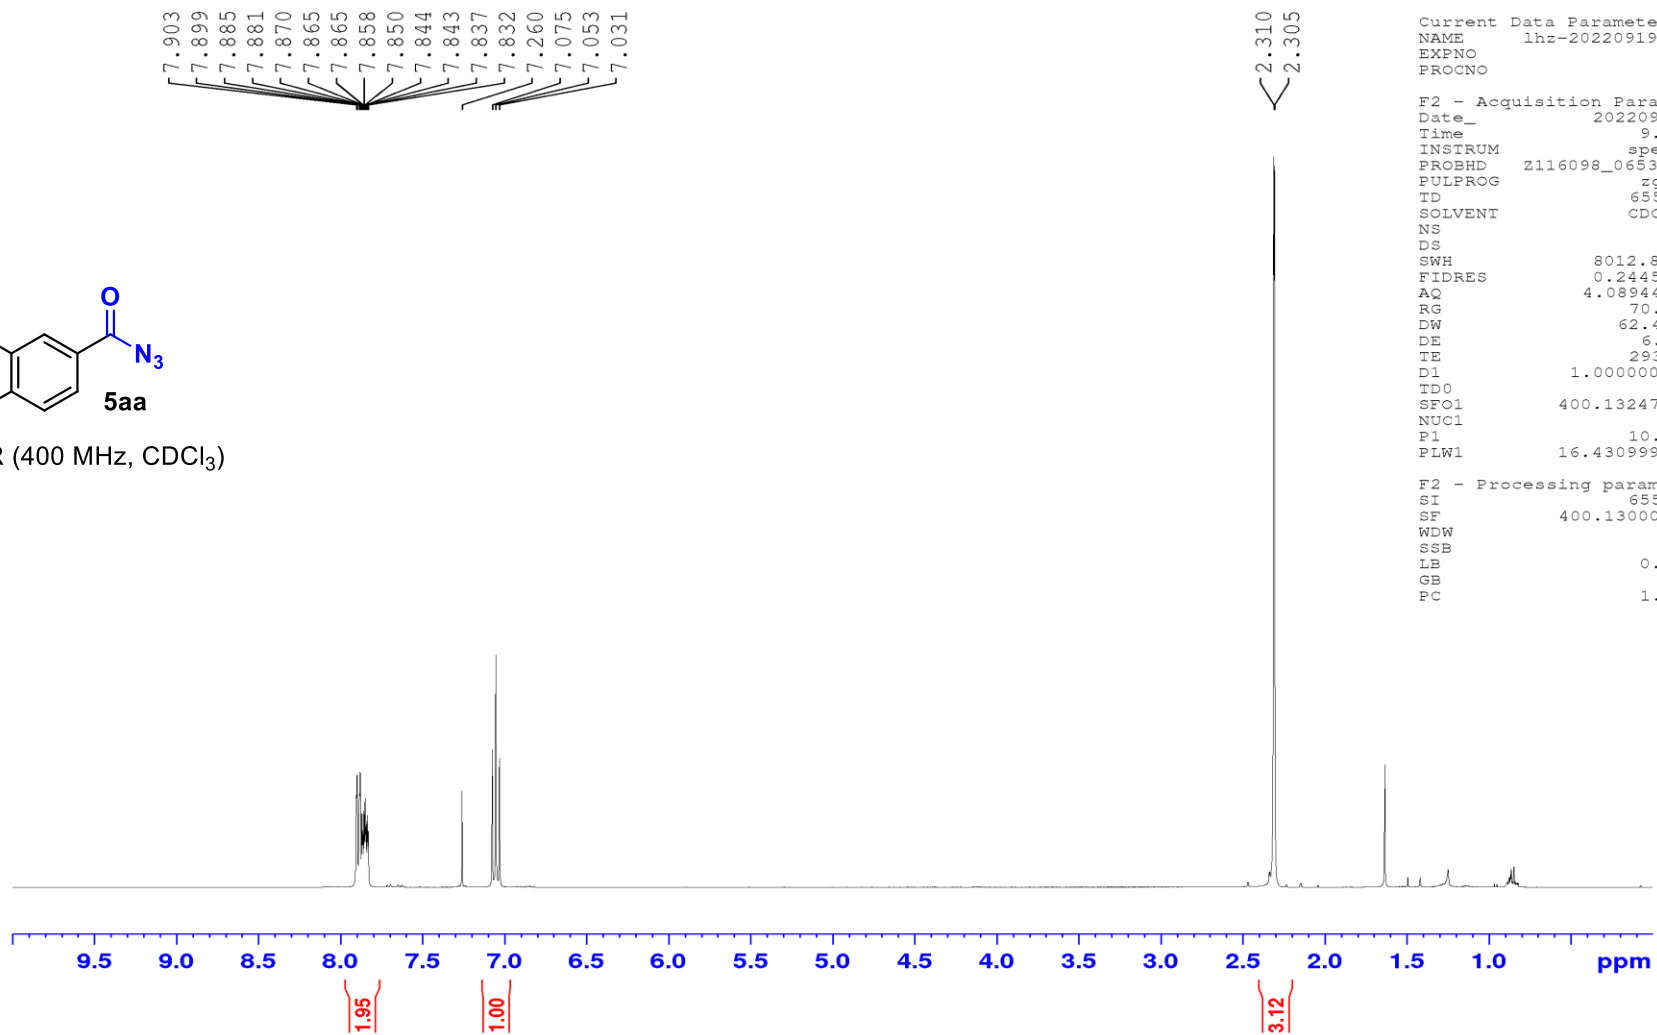

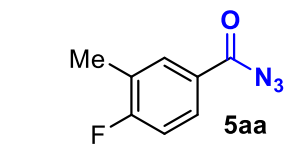

<sup>13</sup>C NMR (100 MHz, CDCl<sub>3</sub>)

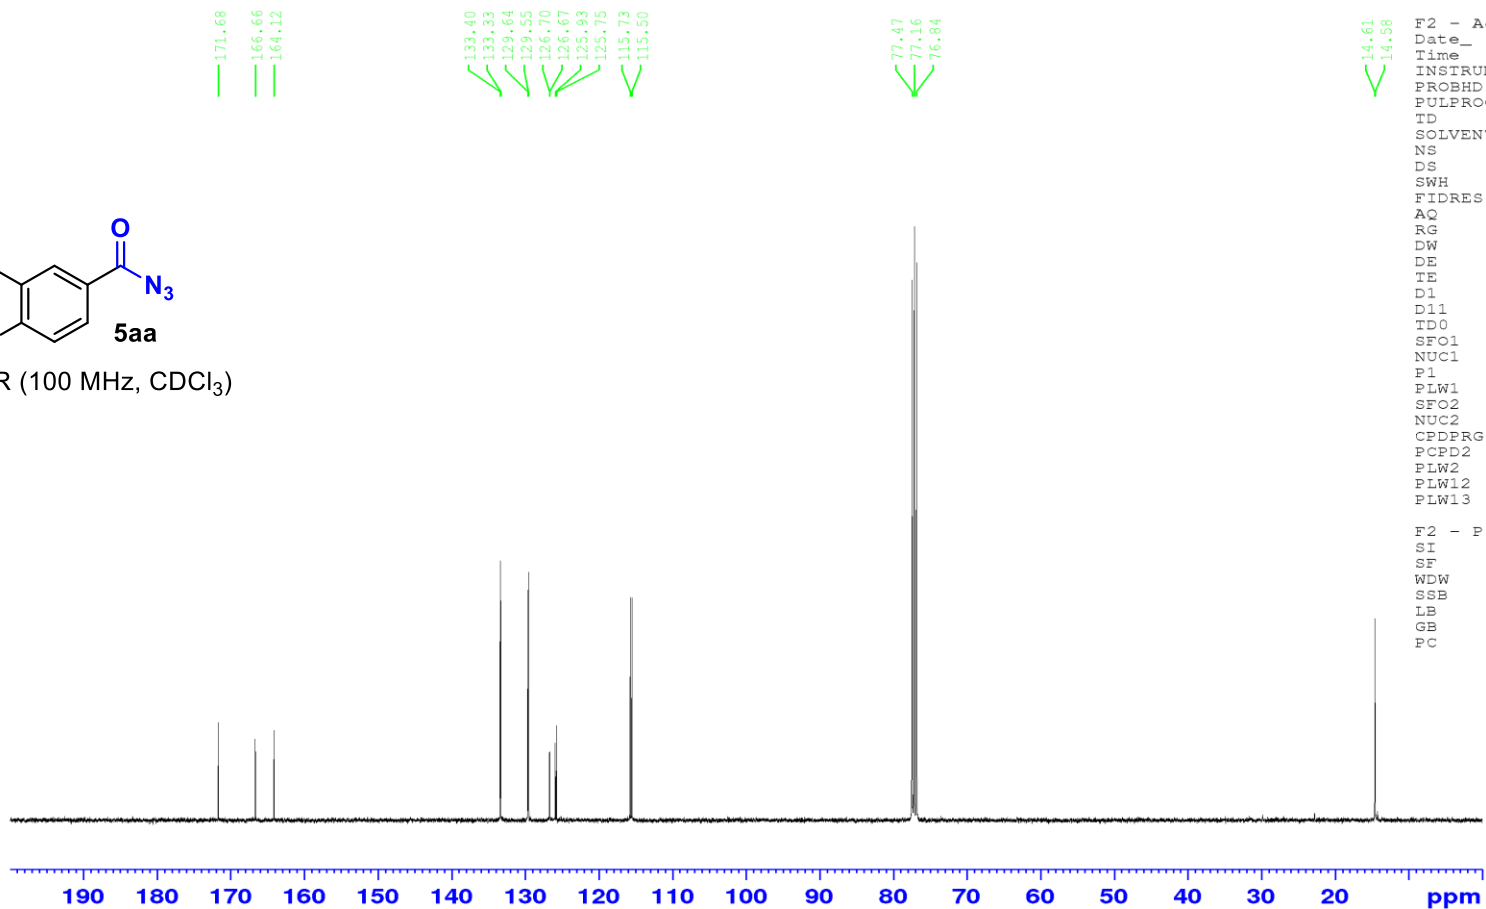

Current Data Parameters  
 NAME lhz-20220919-4  
 EXPNO 2  
 PROCNO 1

F2 - Acquisition Parameters  
 Date\_ 20220919  
 Time 11.13 h  
 INSTRUM spect  
 PROBHD Z116098\_0653 (  
 PULPROG zgpg30  
 TD 65536  
 SOLVENT CDCl3  
 NS 888  
 DS 4  
 SWH 24038.461 Hz  
 FIDRES 0.733596 Hz  
 AQ 1.3631488 sec  
 RG 198.36  
 DW 20.800 usec  
 DE 6.50 usec  
 TE 294.5 K  
 D1 2.00000000 sec  
 D11 0.03000000 sec  
 TD0 1  
 SFO1 100.6228298 MHz  
 NUC1 13C  
 P1 10.00 usec  
 PLW1 75.84400177 W  
 SFO2 400.1316005 MHz  
 NUC2 1H  
 CPDPRG[2] waltz16  
 PCPD2 90.00 usec  
 PLW2 16.43099976 W  
 PLW12 0.20286000 W  
 PLW13 0.10204000 W

F2 - Processing parameters  
 SI 32768  
 SF 100.6127571 MHz  
 WDW EM  
 SSB 0  
 LB 1.00 Hz  
 GB 0  
 PC 1.40

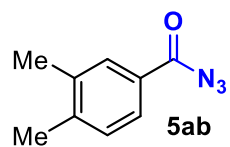

<sup>1</sup>H NMR (400 MHz, CDCl<sub>3</sub>)

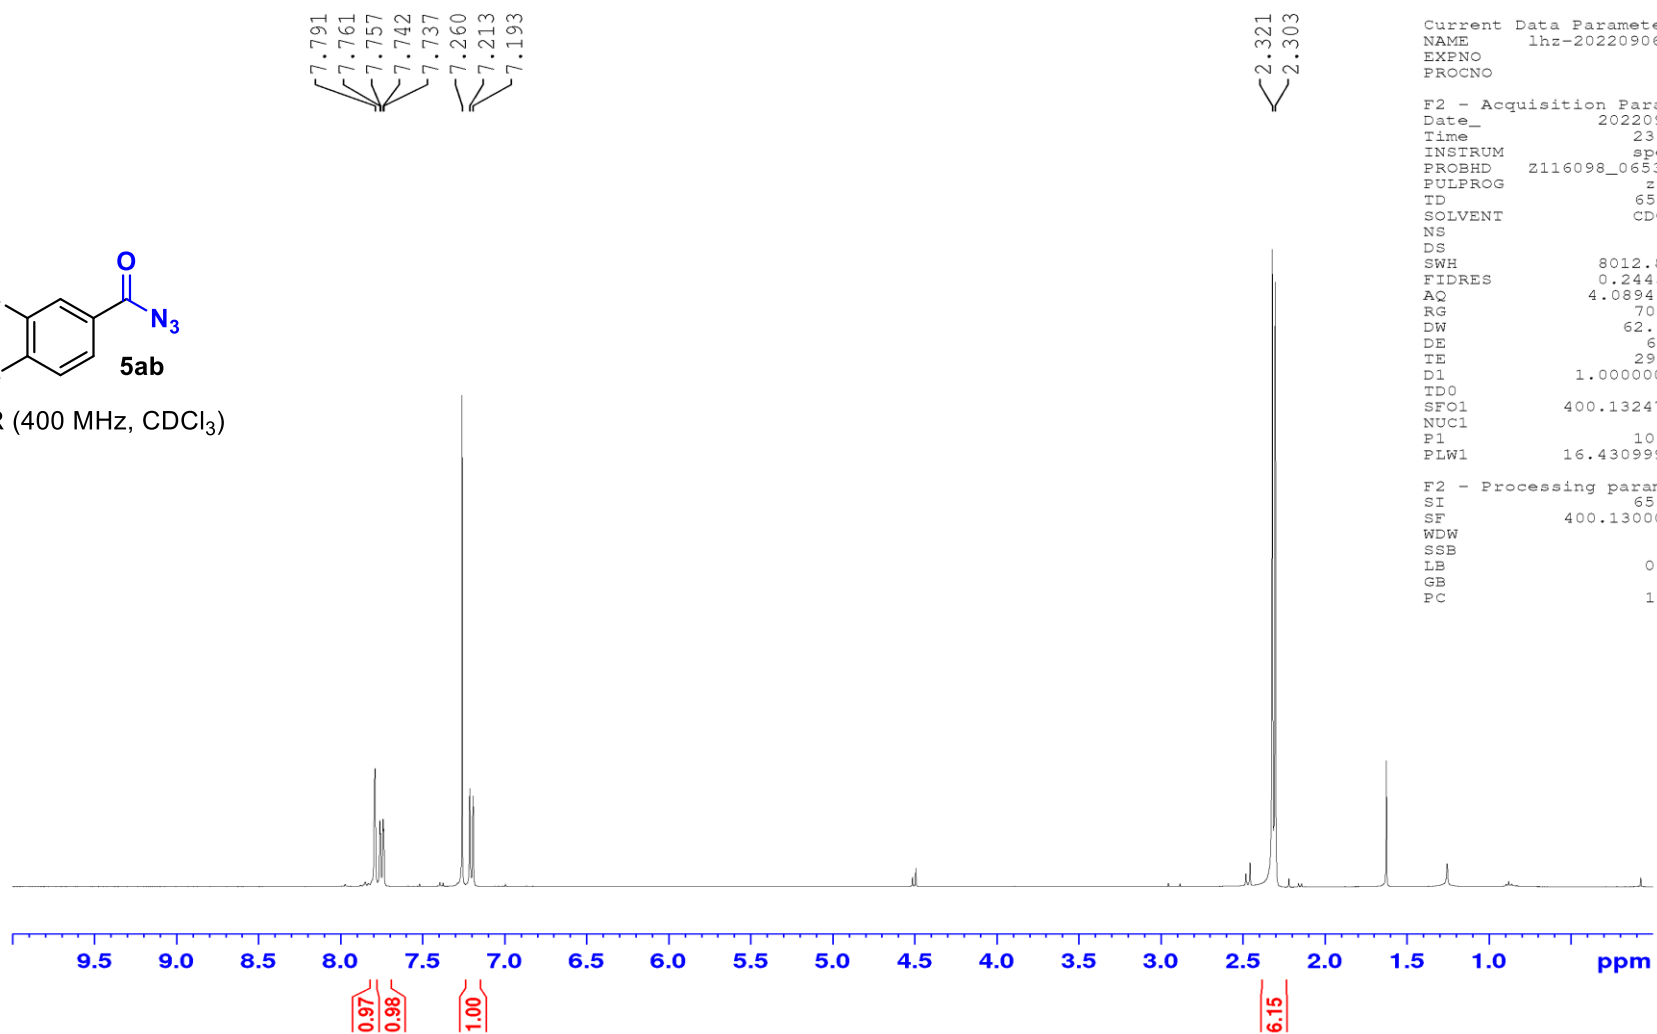

Current Data Parameters  
 NAME lhz-20220906-2  
 EXPNO 1  
 PROCNO 1

F2 - Acquisition Parameters  
 Date\_ 20220906  
 Time 23.16 h  
 INSTRUM spect  
 PROBHD Z116098\_0653 (  
 PULPROG zg30  
 TD 65536  
 SOLVENT CDCl3  
 NS 8  
 DS 2  
 SWH 8012.820 Hz  
 FIDRES 0.244532 Hz  
 AQ 4.0894465 sec  
 RG 70.89  
 DW 62.400 usec  
 DE 6.50 usec  
 TE 294.3 K  
 D1 1.00000000 sec  
 TDO 1  
 SFO1 400.1324708 MHz  
 NUC1 1H  
 P1 10.00 usec  
 PLW1 16.43099976 W

F2 - Processing parameters  
 SI 65536  
 SF 400.1300098 MHz  
 WDW EM  
 SSB 0  
 LB 0.30 Hz  
 GB 0  
 PC 1.00

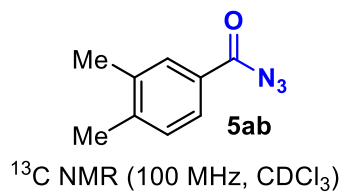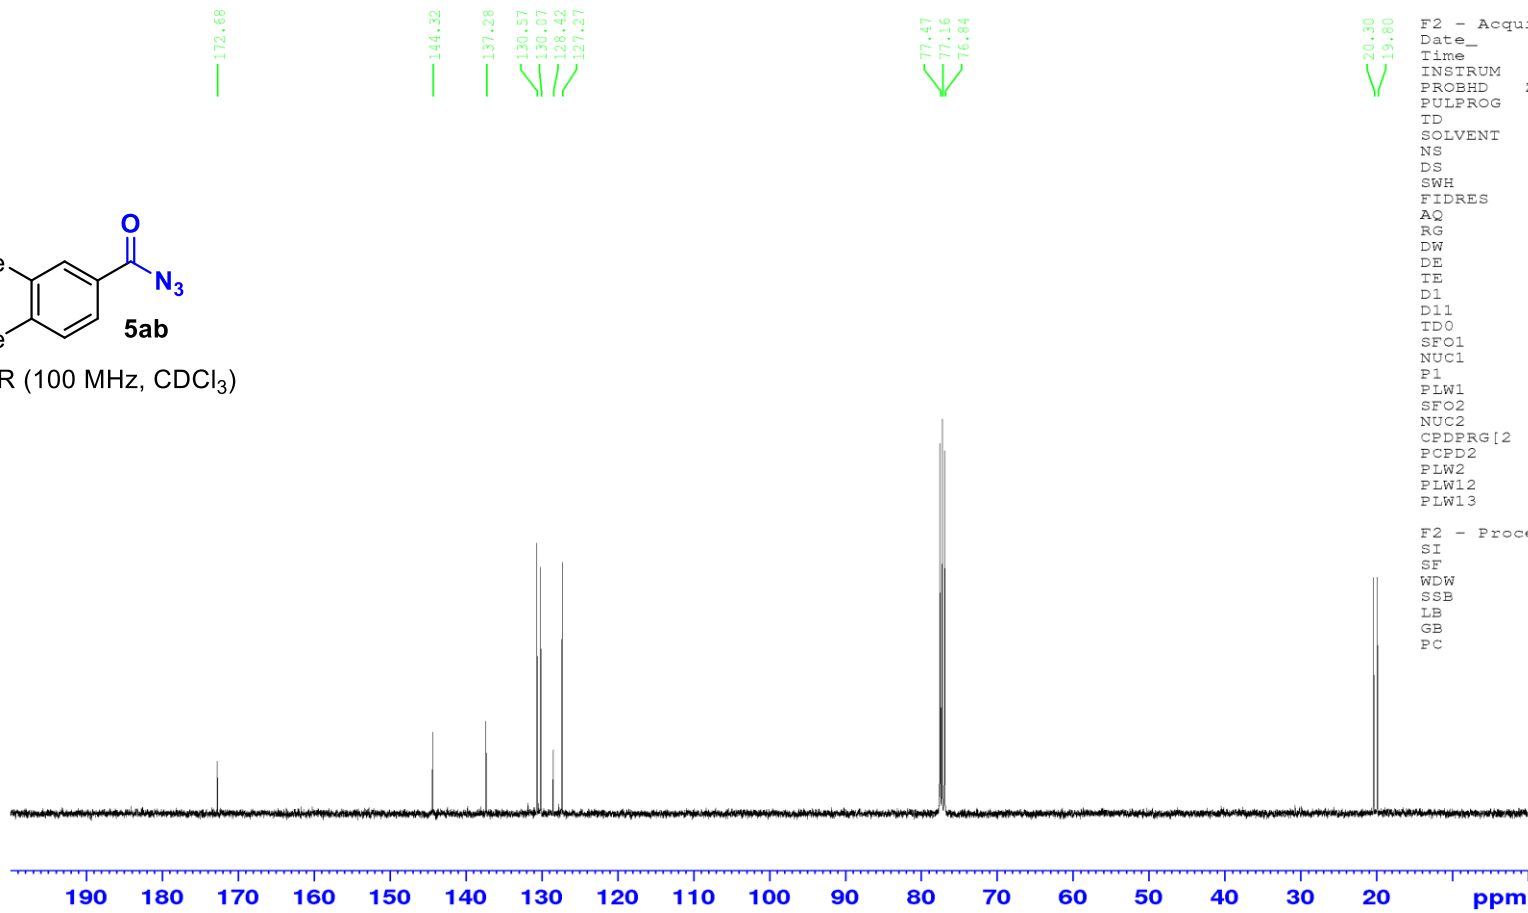

```

Current Data Parameters
NAME      lhz-20220906-2
EXPNO     2
PROCNO    1

F2 - Acquisition Parameters
Date_     20220906
Time      23.27 h
INSTRUM   spect
PROBHD    Z116098_0653 (
PULPROG   zgpg30
TD         65536
SOLVENT   CDCl3
NS         169
DS         4
SWH        24038.461 Hz
FIDRES     0.733596 Hz
AQ         1.3631488 sec
RG         198.36
DW         20.800 usec
DE         6.50 usec
TE         295.0 K
D1         2.00000000 sec
D11        0.03000000 sec
TD0        1
SFO1       100.6228298 MHz
NUC1        13C
P1          10.00 usec
PLW1        75.84400177 W
SFO2        400.1316005 MHz
NUC2         1H
CPDPRG[2]  waltz16
PCPD2       90.00 usec
PLW2        16.43099976 W
PLW12       0.20286000 W
PLW13       0.10204000 W

F2 - Processing parameters
SI          32768
SF          100.6127579 MHz
WDW         EM
SSB         0
LB          1.00 Hz
GB          0
PC          1.40
  
```

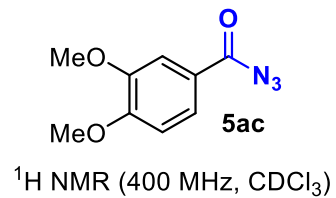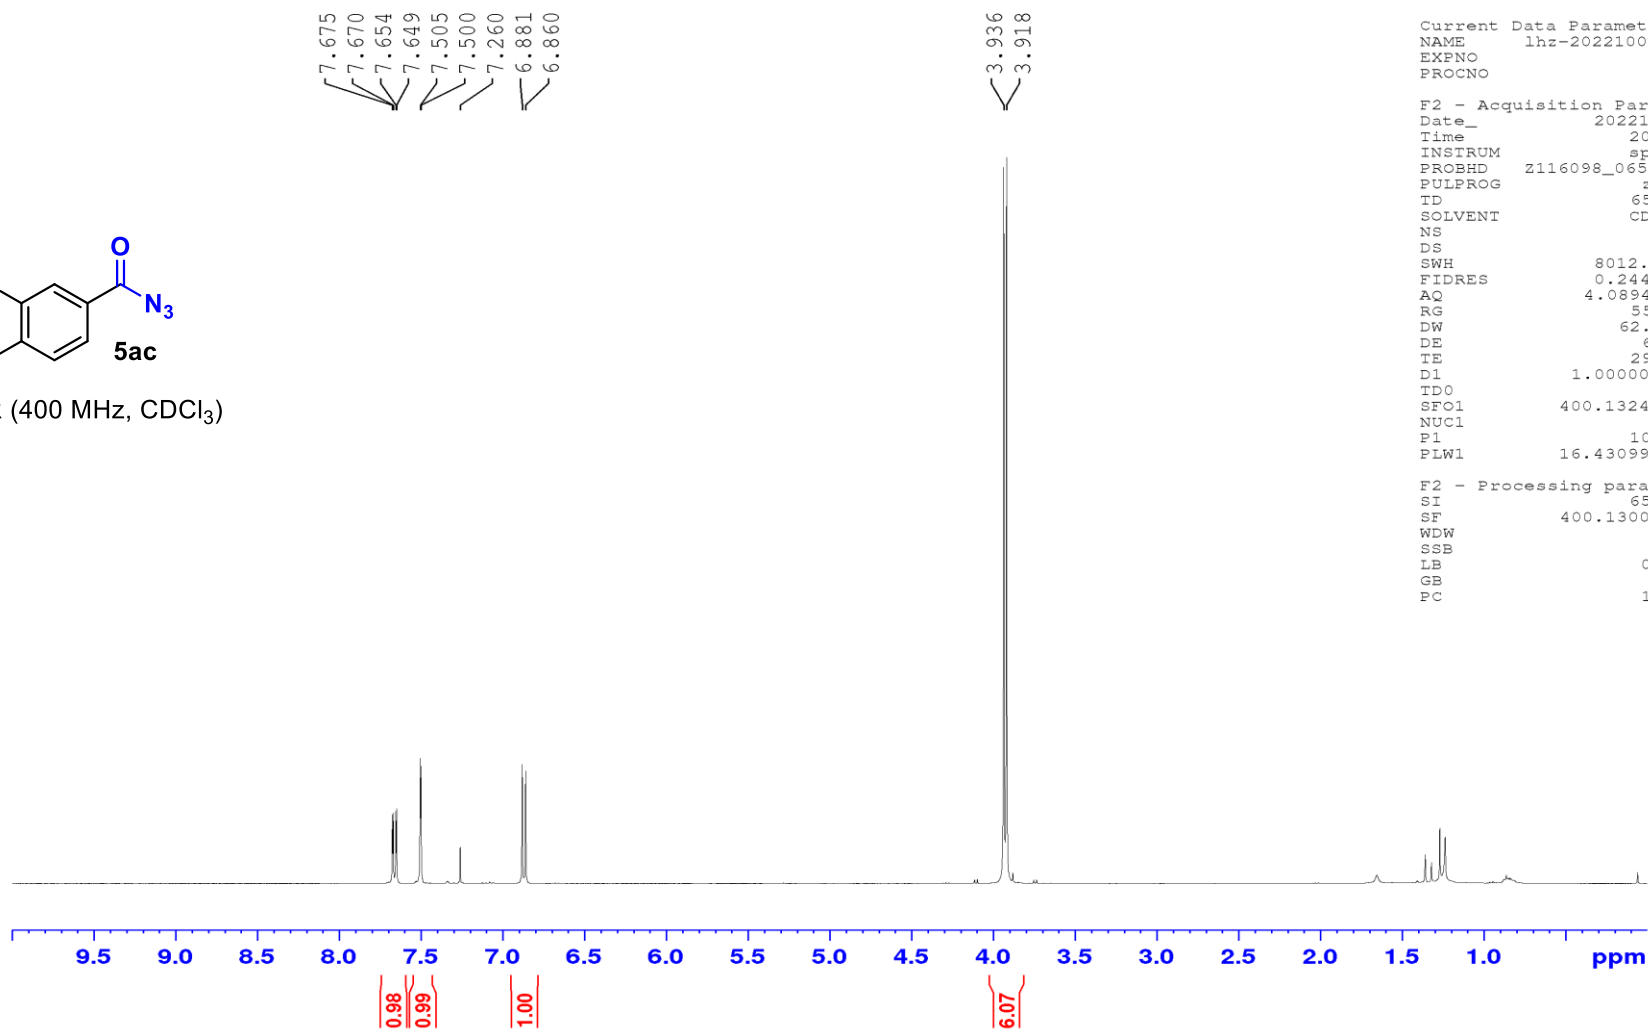

Current Data Parameters  
 NAME lhz-20221007-2  
 EXPNO 1  
 PROCNO 1

F2 - Acquisition Parameters  
 Date\_ 20221007  
 Time 20.54 h  
 INSTRUM spect  
 PROBHD Z116098\_0653 (  
 PULPROG zg30  
 ID 65536  
 SOLVENT CDCl3  
 NS 16  
 DS 2  
 SWH 8012.820 Hz  
 FIDRES 0.244532 Hz  
 AQ 4.0894465 sec  
 RG 55.99  
 DW 62.400 usec  
 DE 6.50 usec  
 TE 294.1 K  
 D1 1.00000000 sec  
 TD0 1  
 SFO1 400.1324708 MHz  
 NUC1 1H  
 P1 10.00 usec  
 PLW1 16.43099976 W

F2 - Processing parameters  
 SI 65536  
 SF 400.1300093 MHz  
 WDW EM  
 SSB 0  
 LB 0.30 Hz  
 GB 0  
 PC 1.00

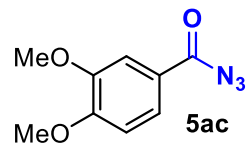

<sup>13</sup>C NMR (100 MHz, CDCl<sub>3</sub>)

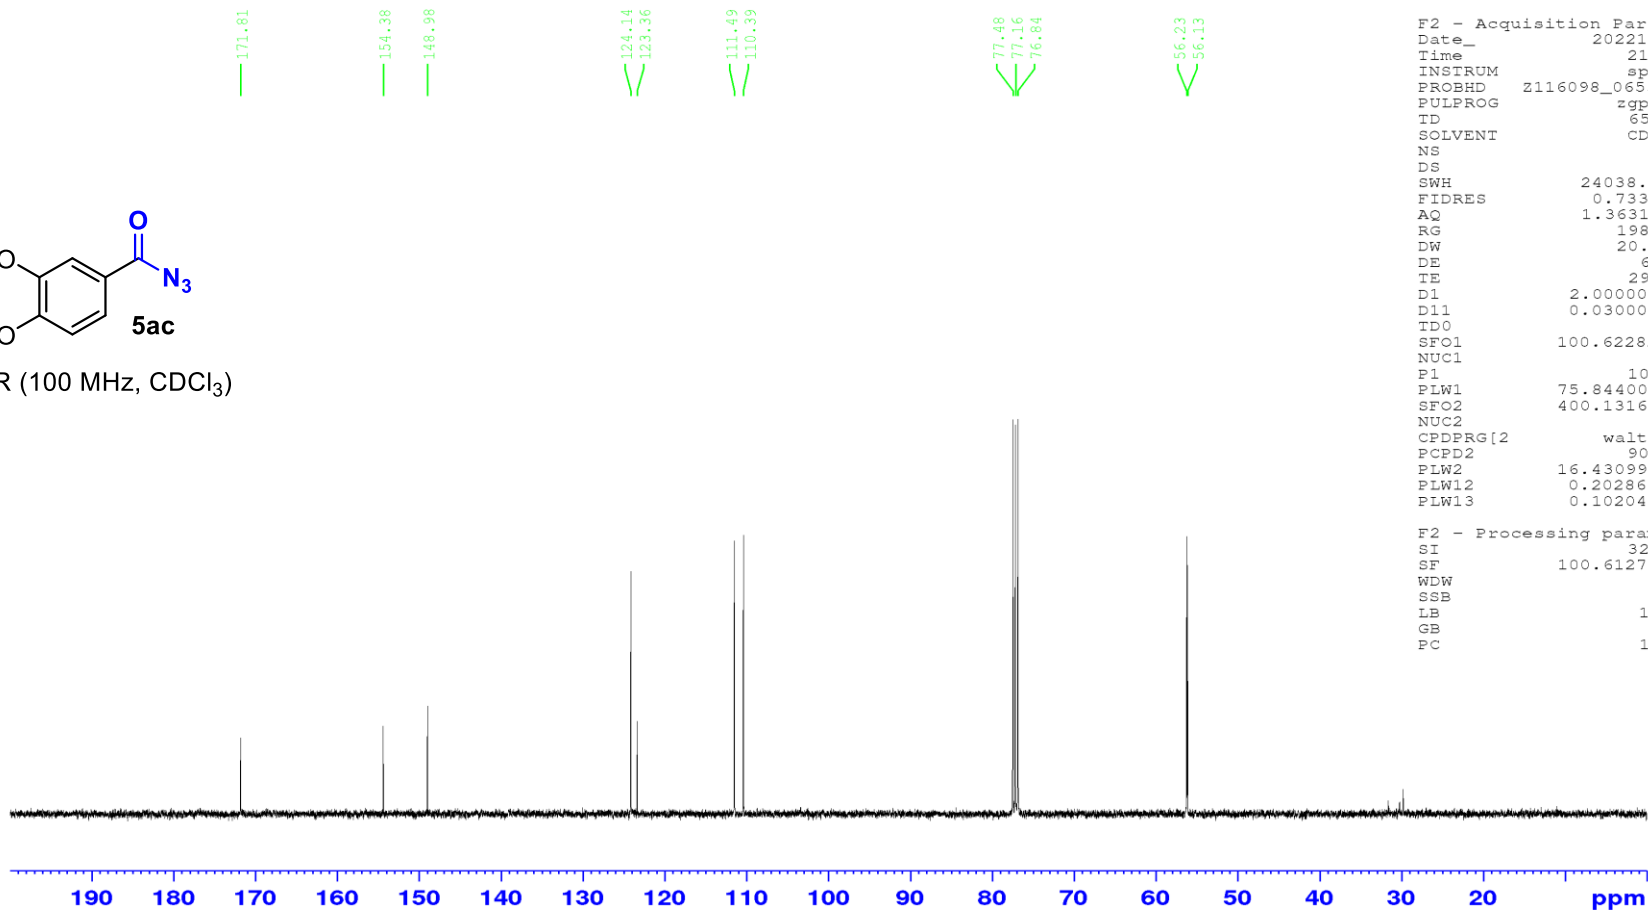

Current Data Parameters  
NAME 1hz-20221007-2  
EXPNO 2  
PROCNO 1

F2 - Acquisition Parameters  
Date\_ 20221007  
Time 21.01 h  
INSTRUM spect  
PROBHD Z116098\_0653 (  
PULPROG zgpg30  
TD 65536  
SOLVENT CDCl3  
NS 108  
DS 4  
SWH 24038.461 Hz  
FIDRES 0.733596 Hz  
AQ 1.3631488 sec  
RG 198.36  
DW 20.800 usec  
DE 6.50 usec  
TE 294.5 K  
D1 2.00000000 sec  
D11 0.03000000 sec  
TD0 1  
SFO1 100.6228298 MHz  
NUC1 13C  
P1 10.00 usec  
PLW1 75.84400177 W  
SFO2 400.1316005 MHz  
NUC2 1H  
CPDPRG[2] waltz16  
PCPD2 90.00 usec  
PLW2 16.43099976 W  
PLW12 0.20286000 W  
PLW13 0.10204000 W

F2 - Processing parameters  
SI 32768  
SF 100.6127594 MHz  
WDW EM  
SSB 0  
LB 1.00 Hz  
GB 0  
PC 1.40



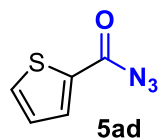

<sup>1</sup>H NMR (400 MHz, CDCl<sub>3</sub>)

7.852  
7.849  
7.843  
7.839  
7.673  
7.670  
7.660  
7.657  
7.260  
7.150  
7.141  
7.138  
7.128

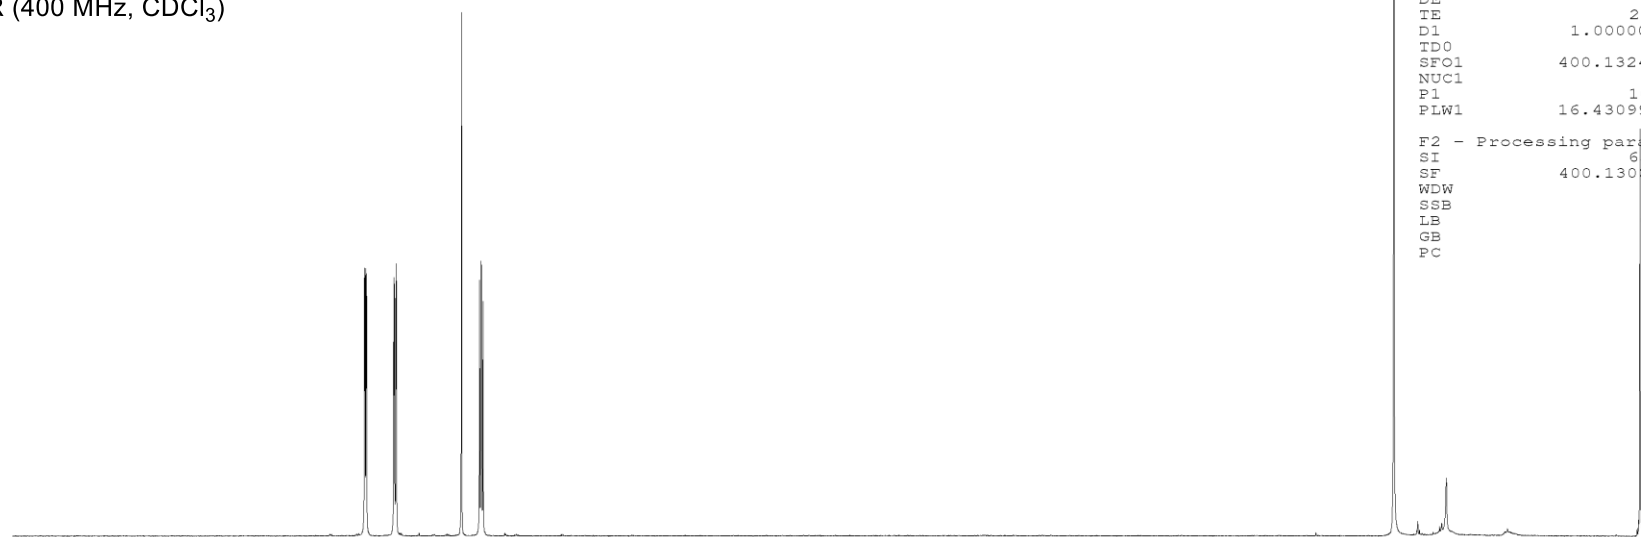

9.5 9.0 8.5 8.0 7.5 7.0 6.5 6.0 5.5 5.0 4.5 4.0 3.5 3.0 2.5 2.0 1.5 1.0 ppm

1.00  
1.00  
1.02

Current Data Parameters  
NAME lhz-20211112-1  
EXPNO 1  
PROCNO 1

F2 - Acquisition Parameters  
Date\_ 20211112  
Time 20.09 h  
INSTRUM spect  
PROBHD z116098\_0653 (  
PULPROG zg30  
TD 65536  
SOLVENT CDCl3  
NS 8  
DS 2  
SWH 8012.820 Hz  
FIDRES 0.244532 Hz  
AQ 4.0894465 sec  
RG 127.66  
DW 62.400 usec  
DE 6.50 usec  
TE 292.7 K  
D1 1.00000000 sec  
TD0 1  
SFO1 400.1324708 MHz  
NUC1 1H  
P1 10.00 usec  
PLW1 16.43099976 W

F2 - Processing parameters  
SI 65536  
SF 400.1300099 MHz  
WDW EM  
SSB 0  
LB 0.30 Hz  
GB 0  
PC 1.00

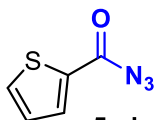

5ad

<sup>13</sup>C NMR (100 MHz, CDCl<sub>3</sub>)

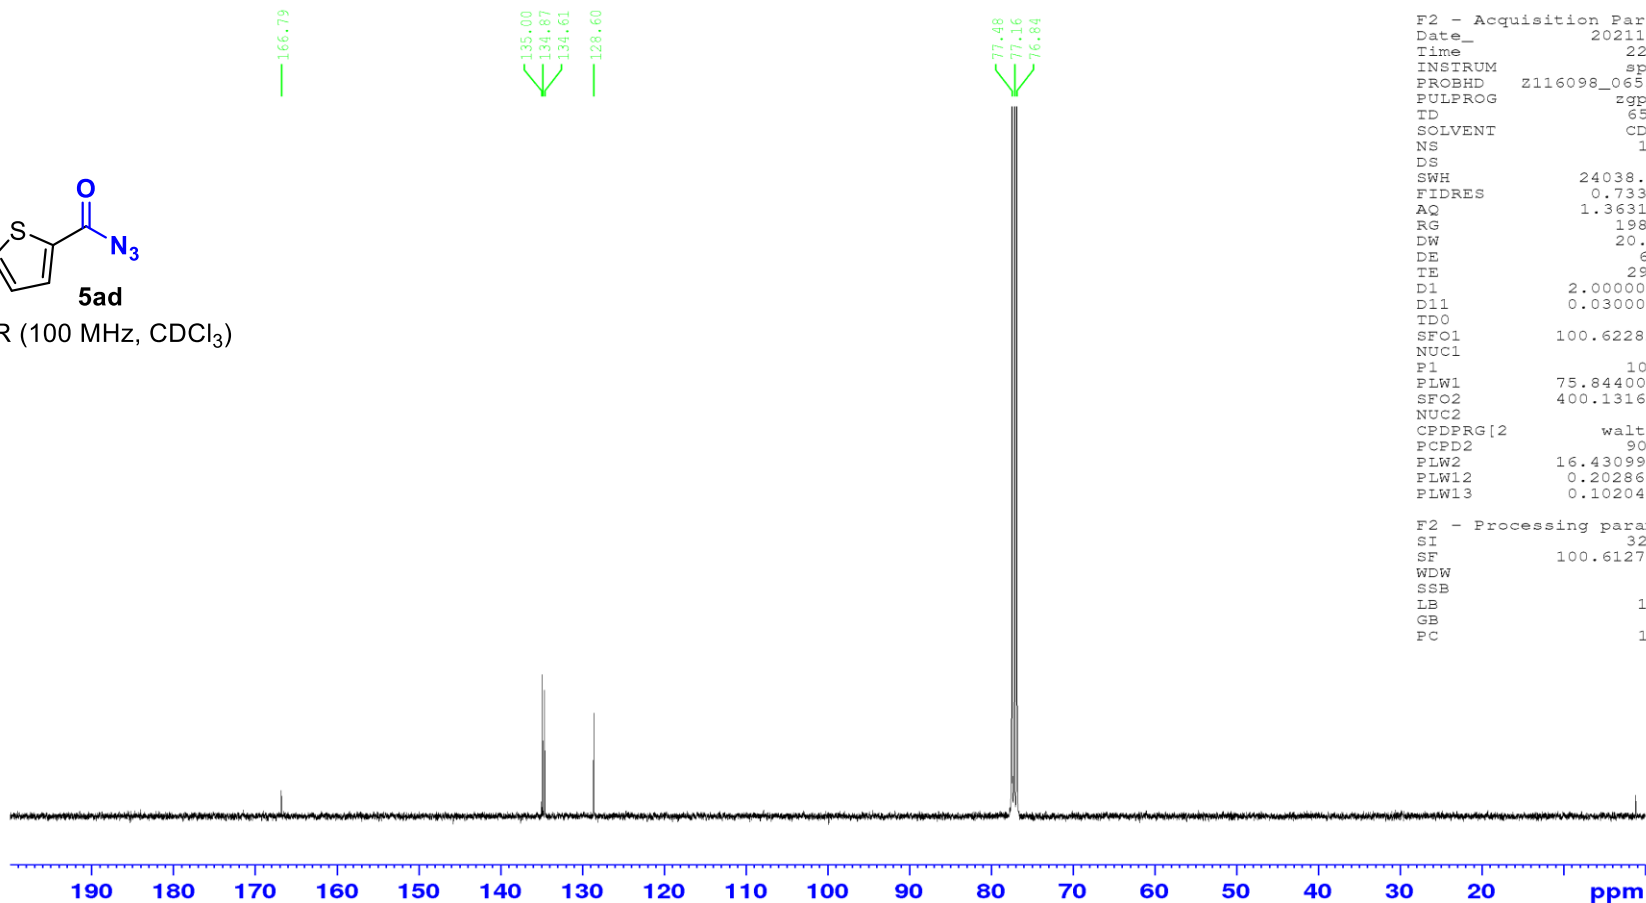

Current Data Parameters  
NAME lhz-20211112-1  
EXPNO 2  
PROCNO 1

F2 - Acquisition Parameters  
Date\_ 20211112  
Time 22.00 h  
INSTRUM spect  
PROBHD Z116098\_0653 (  
PULPROG zgpg30  
TD 65536  
SOLVENT CDCl3  
NS 1333  
DS 4  
SWH 24038.461 Hz  
FIDRES 0.733596 Hz  
AQ 1.3631488 sec  
RG 198.36  
DW 20.800 usec  
DE 6.50 usec  
TE 293.0 K  
D1 2.00000000 sec  
D11 0.03000000 sec  
TD0 1  
SFO1 100.6228298 MHz  
NUC1 13C  
P1 10.00 usec  
PLW1 75.84400177 W  
SFO2 400.1316005 MHz  
NUC2 1H  
CPDPRG[2] waltz16  
PCPD2 90.00 usec  
PLW2 16.43099976 W  
PLW12 0.20286000 W  
PLW13 0.10204000 W

F2 - Processing parameters  
SI 32768  
SF 100.6127564 MHz  
WDW EM  
SSB 0  
LB 1.00 Hz  
GB 0  
PC 1.40

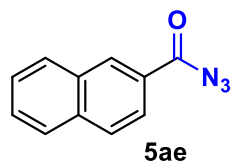

<sup>1</sup>H NMR (400 MHz, CDCl<sub>3</sub>)

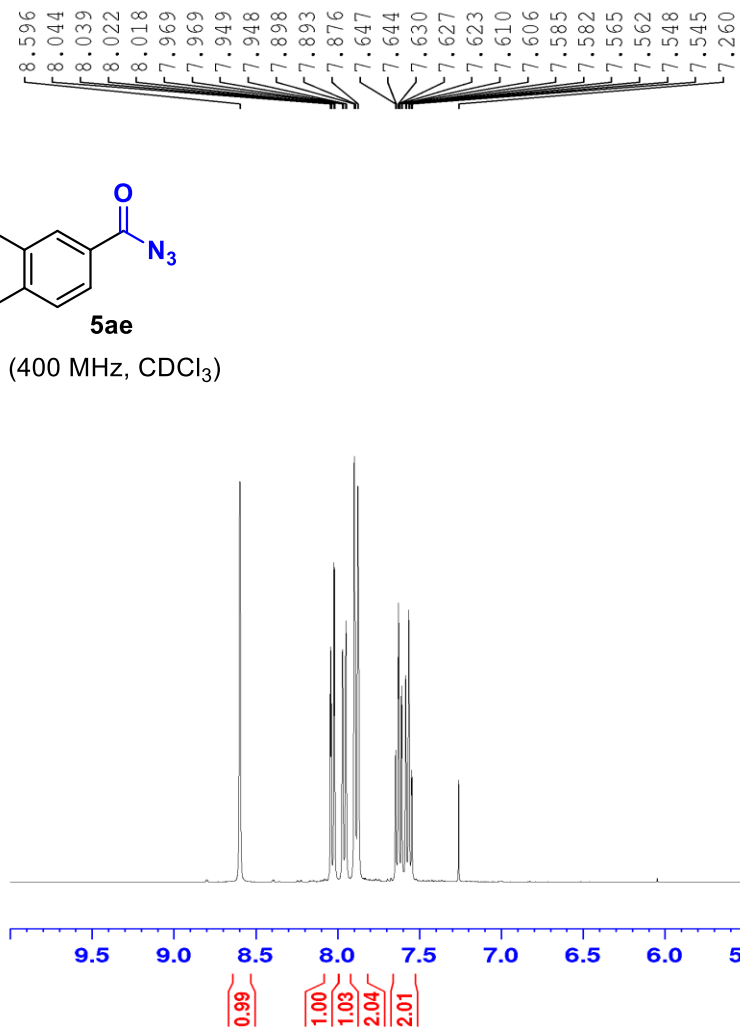

```

Current Data Parameters
NAME      lhz-20211112-2
EXPNO     1
PROCNO    1

F2 - Acquisition Parameters
Date_     20211112
Time      20.13 h
INSTRUM   spect
PROBHD    Z116098_0653 (
PULPROG   zg30
TD         65536
SOLVENT   CDCl3
NS         8
DS         2
SWH        8012.820 Hz
FIDRES     0.244532 Hz
AQ         4.0894465 sec
RG         70.89
DW         62.400 usec
DE         6.50 usec
TE         292.5 K
D1         1.00000000 sec
TD0        1
SFO1      400.1324708 MHz
NUC1       1H
P1         10.00 usec
PLW1      16.43099976 W

F2 - Processing parameters
SI         65536
SF         400.1300098 MHz
WDW        EM
SSB        0
LB         0.30 Hz
GB         0
FC         1.00
  
```

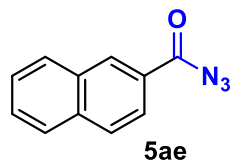

<sup>13</sup>C NMR (100 MHz, CDCl<sub>3</sub>)

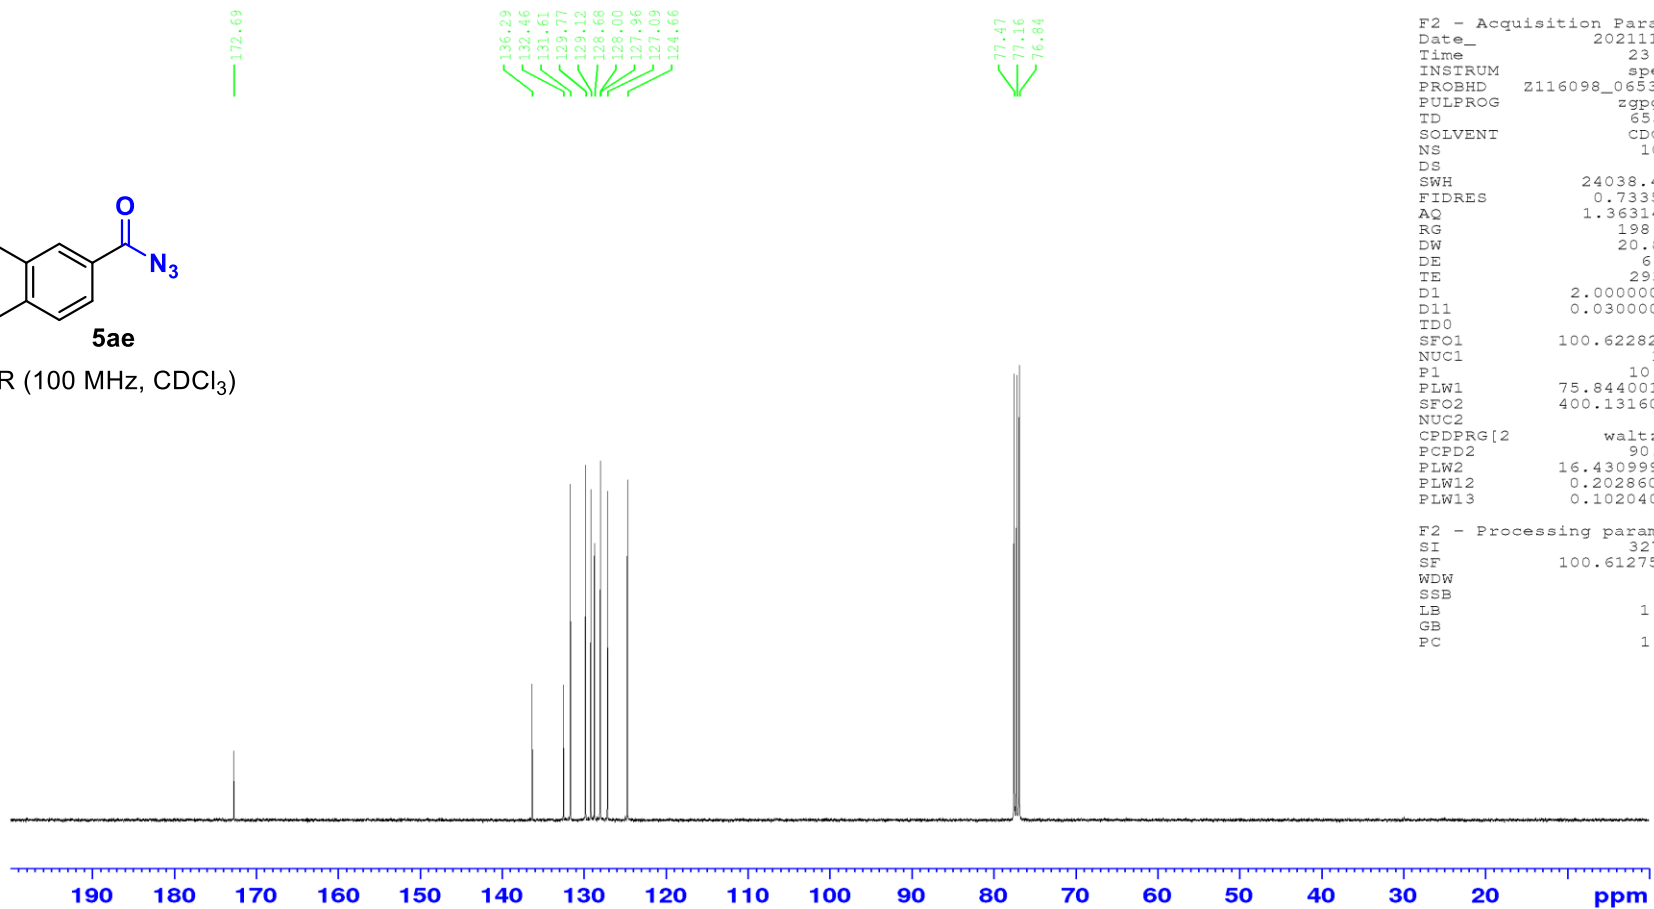

Current Data Parameters  
NAME lhz-20211112-2  
EXPNO 2  
PROCNO 1

F2 - Acquisition Parameters  
Date\_ 20211112  
Time 23.02 h  
INSTRUM spect  
PROBHD Z116098\_0653 (  
PULPROG zgpg30  
TD 65536  
SOLVENT CDCl3  
NS 1024  
DS 4  
SWH 24038.461 Hz  
FIDRES 0.733596 Hz  
AQ 1.3631488 sec  
RG 198.36  
DW 20.800 usec  
DE 6.50 usec  
TE 293.1 K  
D1 2.00000000 sec  
D11 0.03000000 sec  
TD0 1  
SFO1 100.6228298 MHz  
NUC1 13C  
P1 10.00 usec  
PLW1 75.84400177 W  
SFO2 400.1316005 MHz  
NUC2 1H  
CPDPRG[2] waltz16  
PCPD2 90.00 usec  
PLW2 16.43099976 W  
PLW12 0.20286000 W  
PLW13 0.10204000 W

F2 - Processing parameters  
SI 32768  
SF 100.6127597 MHz  
WDW EM  
SSB 0  
LB 1.00 Hz  
GB 0  
PC 1.40

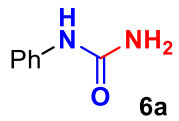

<sup>1</sup>H NMR (400 MHz, DMSO-d<sub>6</sub>)

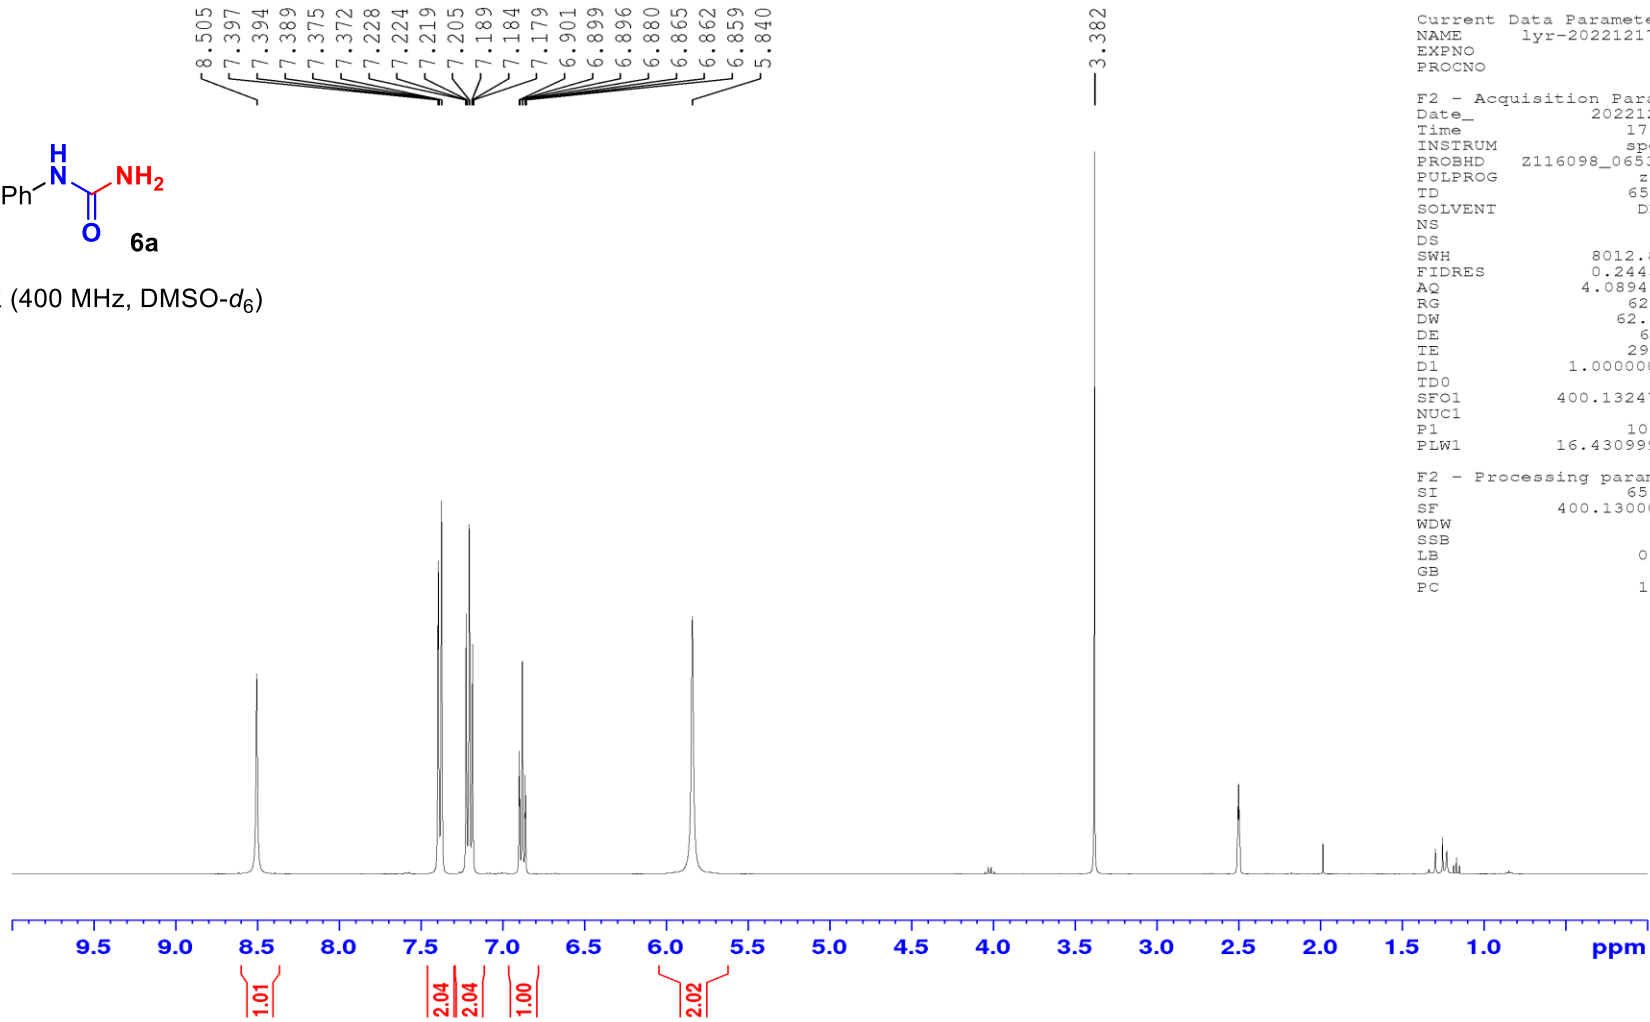

```

Current Data Parameters
NAME      lyr-20221217-1
EXPNO    1
PROCNO   1

F2 - Acquisition Parameters
Date_    20221217
Time     17.50 h
INSTRUM  spect
PROBHD   Z116098_0653 (
PULPROG  zg30
TD       65536
SOLVENT  DMSO
NS       16
DS       2
SWH      8012.820 Hz
FIDRES   0.244532 Hz
AQ       4.0894465 sec
RG       62.98
DW       62.400 usec
DE       6.50 usec
TE       292.9 K
D1       1.00000000 sec
TD0      1
SFO1     400.1324708 MHz
NUC1     1H
P1       10.00 usec
PLW1     16.43099976 W

F2 - Processing parameters
SI       65536
SF       400.1300032 MHz
WDW      EM
SSB      0
LB       0.30 Hz
GB       0
PC       1.00
  
```

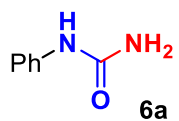

<sup>13</sup>C NMR (100 MHz, DMSO-d<sub>6</sub>)

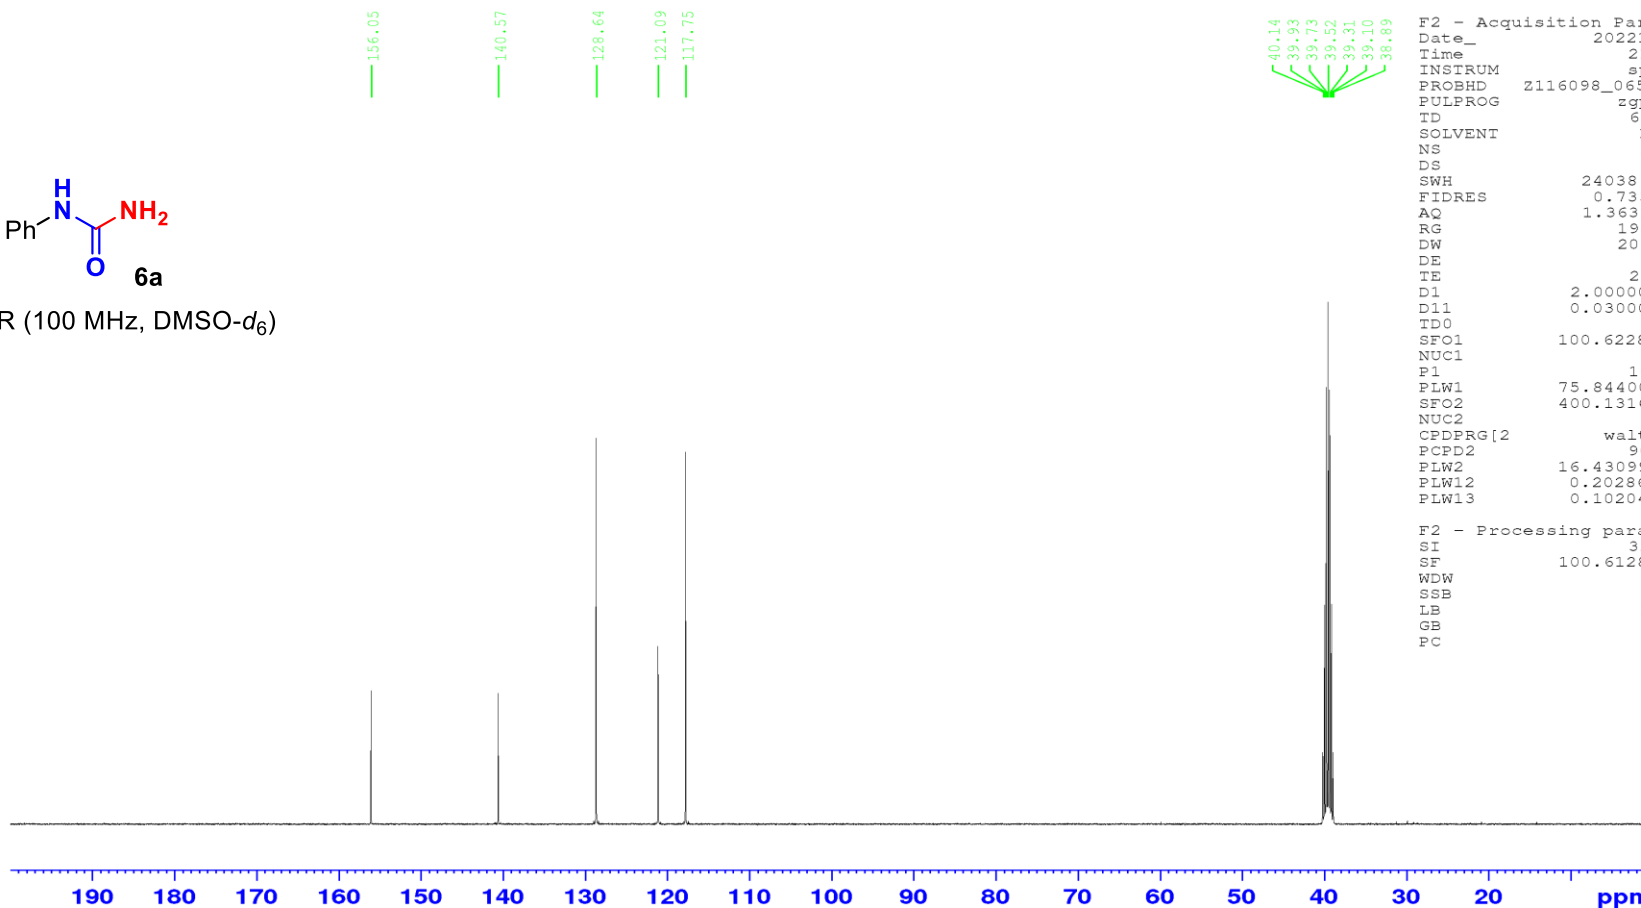

Current Data Parameters  
NAME lyr-20221217-1  
EXPNO 2  
PROCNO 1

F2 - Acquisition Parameters  
Date\_ 20221217  
Time 21.07 h  
INSTRUM spect  
PROBHD Z116098\_0653 (  
PULPROG zgpg30  
TD 65536  
SOLVENT DMSO  
NS 2048  
DS 4  
SWH 24038.461 Hz  
FIDRES 0.733596 Hz  
AQ 1.3631488 sec  
RG 198.36  
DW 20.800 usec  
DE 6.50 usec  
TE 293.4 K  
D1 2.00000000 sec  
D11 0.03000000 sec  
TD0 1  
SFO1 100.6228298 MHz  
NUC1 13C  
P1 10.00 usec  
PLW1 75.84400177 W  
SFO2 400.1316005 MHz  
NUC2 1H  
CPDPRG[2] waltz16  
PCPD2 90.00 usec  
PLW2 16.43099976 W  
PLW12 0.20286000 W  
PLW13 0.10204000 W

F2 - Processing parameters  
SI 32768  
SF 100.6128109 MHz  
WDW EM  
SSB 0  
LB 1.00 Hz  
GB 0  
PC 1.40

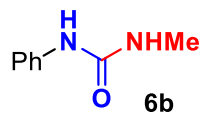

<sup>1</sup>H NMR (400 MHz, DMSO-d<sub>6</sub>)

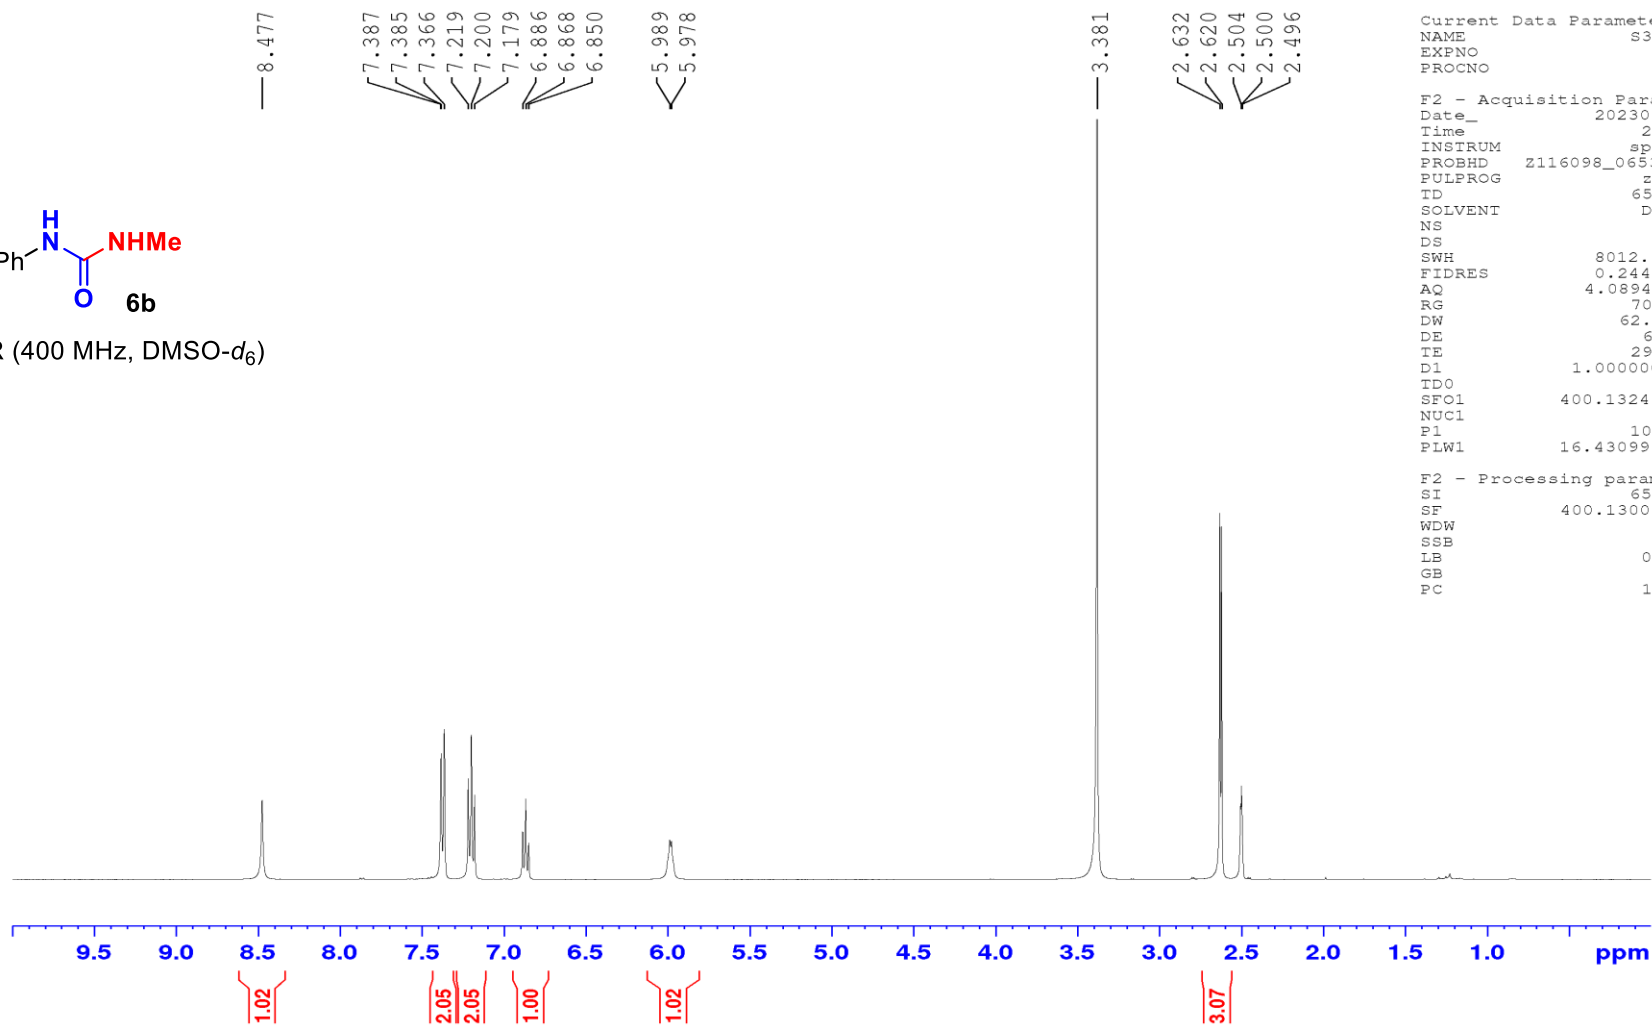

```

Current Data Parameters
NAME          S33-1
EXPNO         1
PROCNO        1

F2 - Acquisition Parameters
Date_         20230708
Time          2.04 h
INSTRUM       spect
PROBHD        Z116098_0653 (
PULPROG       zg30
TD            65536
SOLVENT       DMSO
NS            16
DS            2
SWH           8012.820 Hz
FIDRES        0.244532 Hz
AQ            4.0894465 sec
RG            70.89
DW            62.400 usec
DE            6.50 usec
TE            292.4 K
D1            1.00000000 sec
TD0           1
SFO1          400.1324708 MHz
NUC1          1H
E1            10.00 usec
PLW1          16.43099976 W

F2 - Processing parameters
SI            65536
SF            400.1300031 MHz
WDW           EM
SSB           0
LB            0.30 Hz
GB            0
PC            1.00
  
```

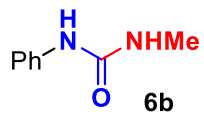

<sup>13</sup>C NMR (100 MHz, DMSO-d<sub>6</sub>)

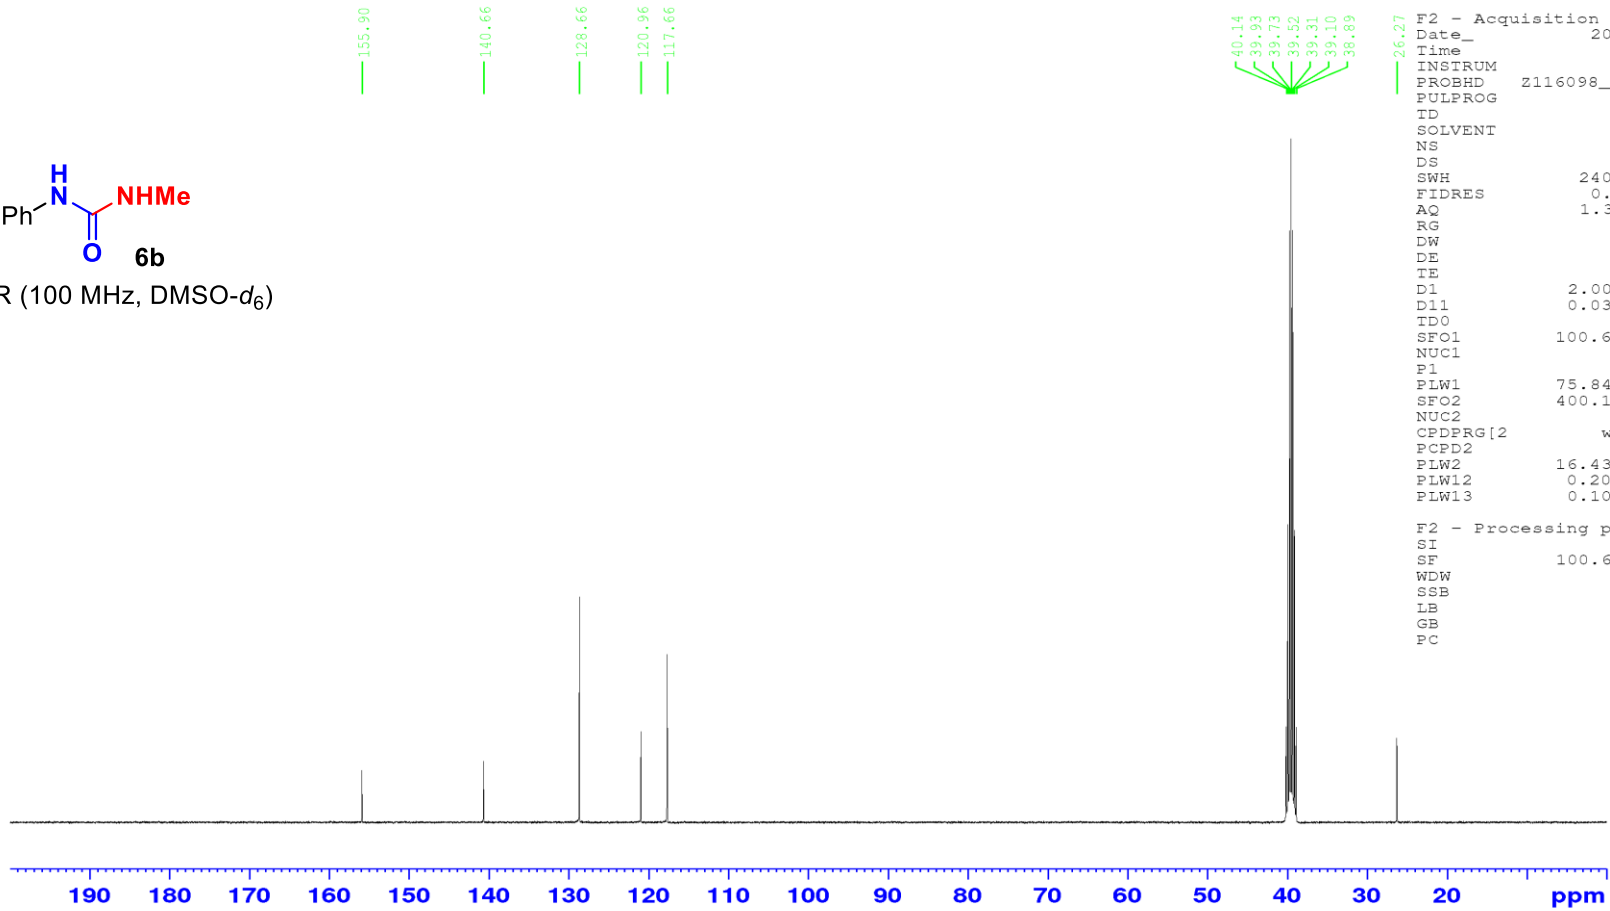

```

Current Data Parameters
NAME          S33-1
EXPNO         2
PROCNO        1

F2 - Acquisition Parameters
Date_         20230708
Time          4.19 h
INSTRUM       spect
PROBHD        Z116098_0653 (
PULPROG       zgpg30
TD            65536
SOLVENT       DMSO
NS            2333
DS            4
SWH           24038.461 Hz
FIDRES        0.733596 Hz
AQ            1.3631488 sec
RG            198.36
DW            20.800 usec
DE            6.50 usec
TE            293.1 K
D1            2.00000000 sec
D11           0.03000000 sec
TD0           1
SFO1          100.6228298 MHz
NUC1          13c
P1            10.00 usec
PLW1          75.84400177 W
SFO2          400.1316005 MHz
NUC2          1H
CPDPRG[2]    waltz16
PCPD2         90.00 usec
PLW2          16.43099976 W
PLW12         0.20286000 W
PLW13         0.10204000 W

F2 - Processing parameters
SI            32768
SF            100.6128098 MHz
WDW           EM
SSB           0
LB            1.00 Hz
GB            0
PC            1.40

```



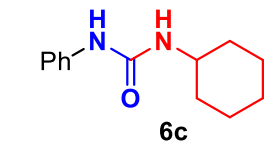

<sup>1</sup>H NMR (400 MHz, CDCl<sub>3</sub>)

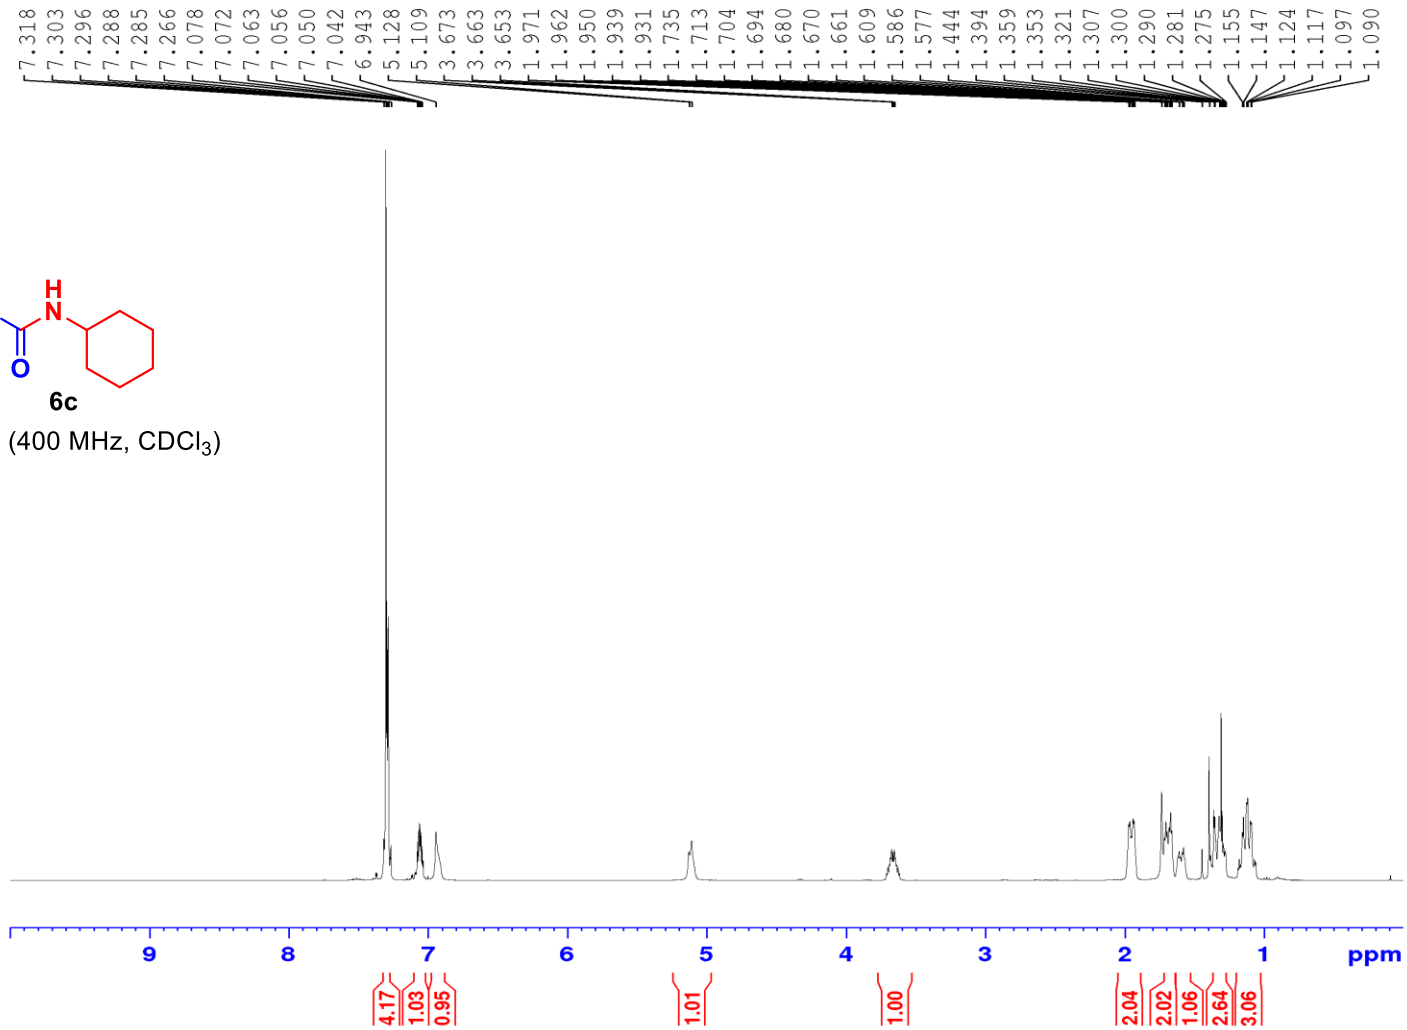

Current Data Parameters  
NAME lyr-20230218-1  
EXPNO 1  
PROCNO 1

F2 - Acquisition Parameters  
Date\_ 20230218  
Time 22.27 h  
INSTRUM spect  
PROBHD Z116098\_0653 (  
PULPROG zg30  
TD 65536  
SOLVENT CDCl3  
NS 16  
DS 2  
SWH 8012.820 Hz  
FIDRES 0.244532 Hz  
AQ 4.0894465 sec  
RG 77.68  
DW 62.400 usec  
DE 6.50 usec  
TE 291.8 K  
D1 1.00000000 sec  
TDO 1  
SFO1 400.1324708 MHz  
NUC1 1H  
P1 10.00 usec  
PLW1 16.43099976 W

F2 - Processing parameters  
SI 65536  
SF 400.1300000 MHz  
WDW EM  
SSB 0  
LB 0.30 Hz  
GB 0  
PC 1.00

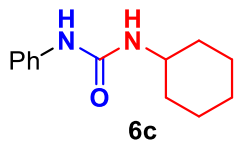

<sup>13</sup>C NMR (100 MHz, CDCl<sub>3</sub>)

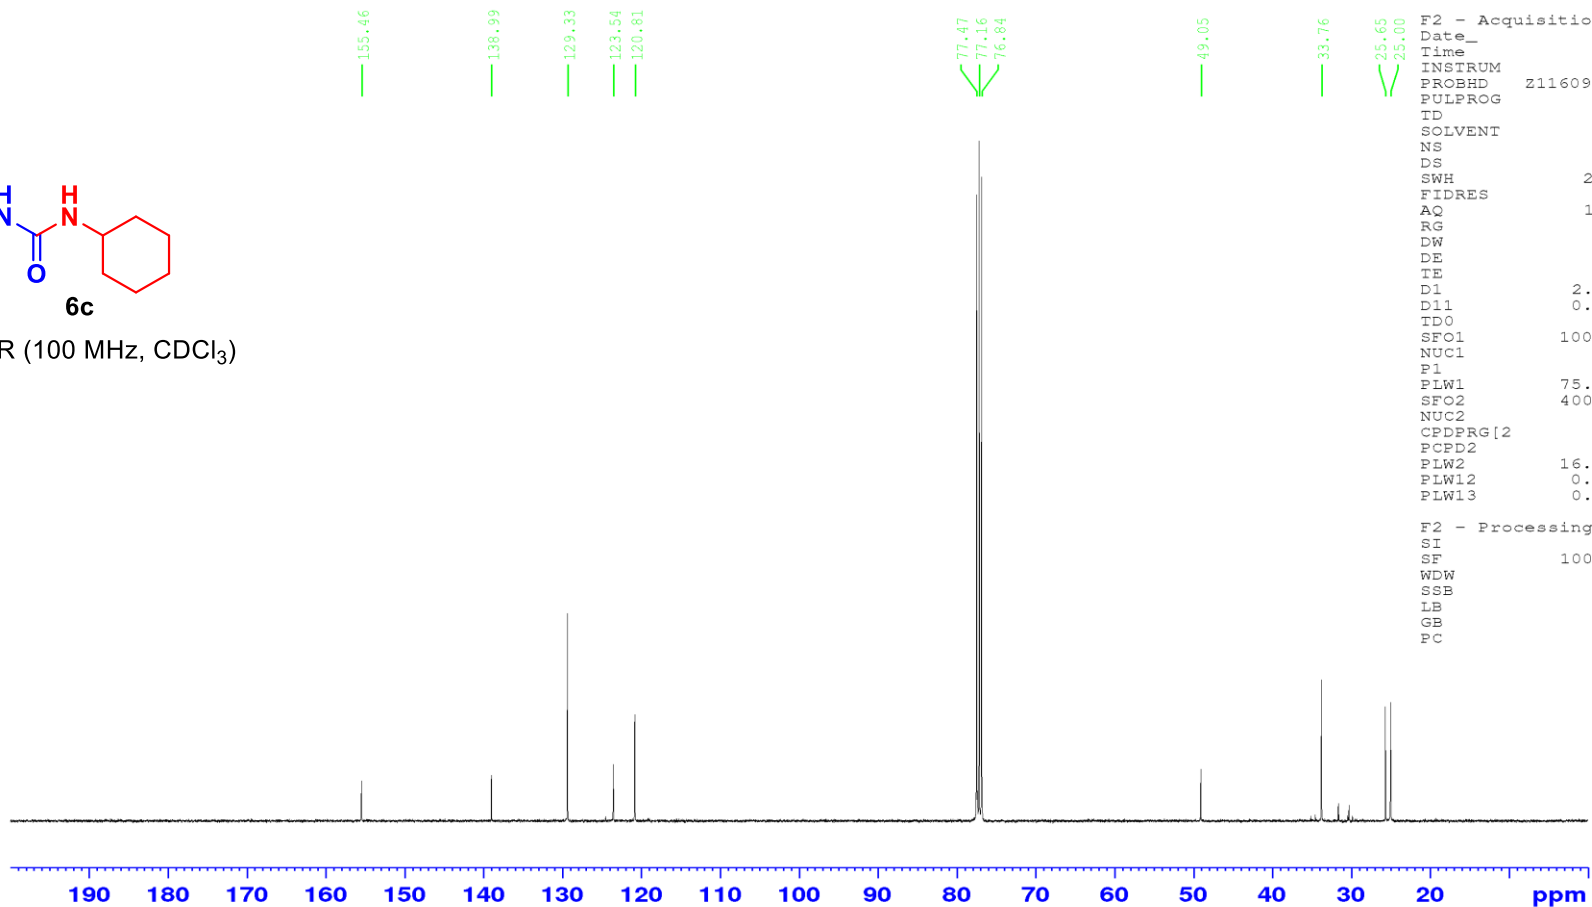

Current Data Parameters  
NAME lyr-20230218-1  
EXPNO 2  
PROCNO 1

F2 - Acquisition Parameters  
Date\_ 20230219  
Time 1.39 h  
INSTRUM spect  
PROBHD Z116098\_0653 (  
PULPROG zgpg30  
TD 65536  
SOLVENT CDCl3  
NS 3333  
DS 4  
SWH 24038.461 Hz  
FIDRES 0.733596 Hz  
AQ 1.3631488 sec  
RG 198.36  
DW 20.800 usec  
DE 6.50 usec  
TE 292.8 K  
D1 2.00000000 sec  
D11 0.03000000 sec  
TD0 1  
SFO1 100.6228298 MHz  
NUC1 13c  
P1 10.00 usec  
PLW1 75.84400177 W  
SFO2 400.1316005 MHz  
NUC2 1H  
CPDPRG[2] waltz16  
PCPD2 90.00 usec  
PLW2 16.43099976 W  
PLW12 0.20286000 W  
PLW13 0.10204000 W

F2 - Processing parameters  
SI 32768  
SF 100.6127579 MHz  
WDW EM  
SSB 0  
LB 1.00 Hz  
GB 0  
FC 1.40

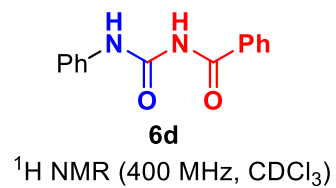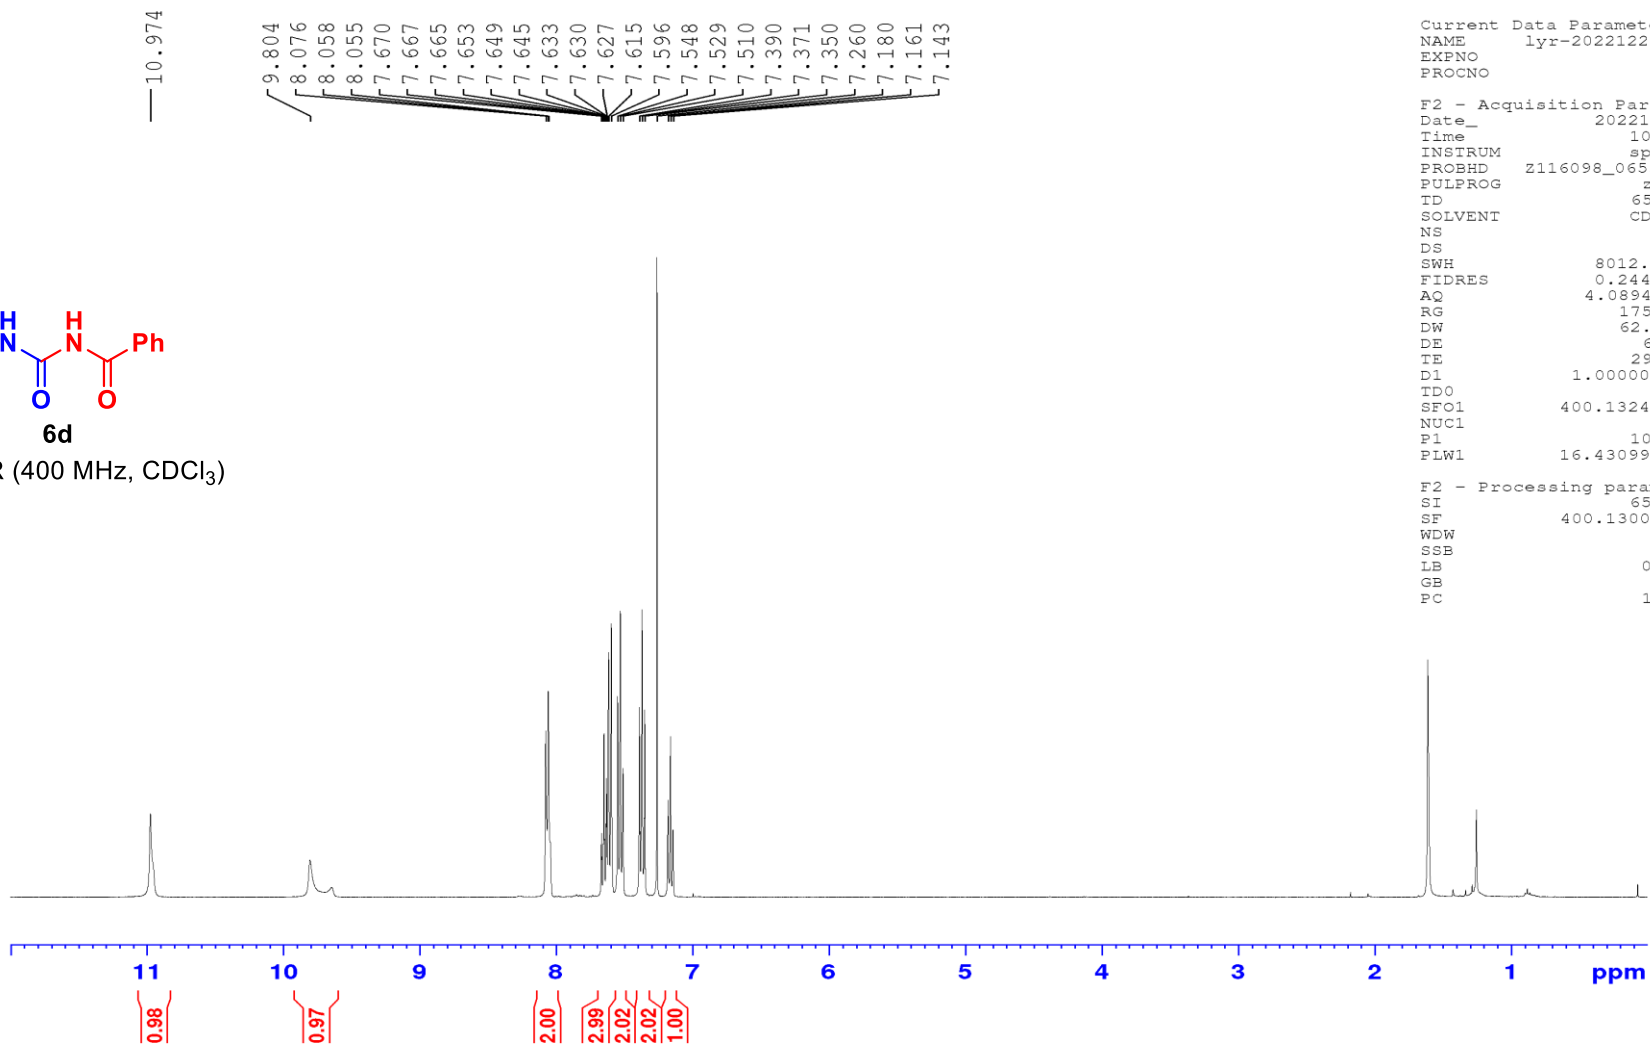

```

Current Data Parameters
NAME      lyr-20221220-2
EXPNO    1
PROCNO   1

F2 - Acquisition Parameters
Date_    20221220
Time     10.40 h
INSTRUM  spect
PROBHD   Z116098_0653 (
PULPROG  zg30
TD       65536
SOLVENT  CDCl3
NS       16
DS       2
SWH      8012.820 Hz
FIDRES   0.244532 Hz
AQ       4.0894465 sec
RG       175.57
DW       62.400 usec
DE       6.50 usec
TE       292.7 K
D1       1.00000000 sec
TD0      1
SFO1     400.1324708 MHz
NUC1     1H
P1       10.00 usec
PLW1     16.43099976 W

F2 - Processing parameters
SI       65536
SF       400.1300098 MHz
WDW      EM
SSB      0
LB       0.30 Hz
GB       0
FC       1.00
  
```

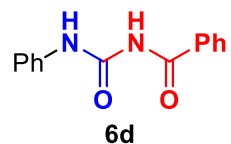

6d

<sup>13</sup>C NMR (100 MHz, CDCl<sub>3</sub>)

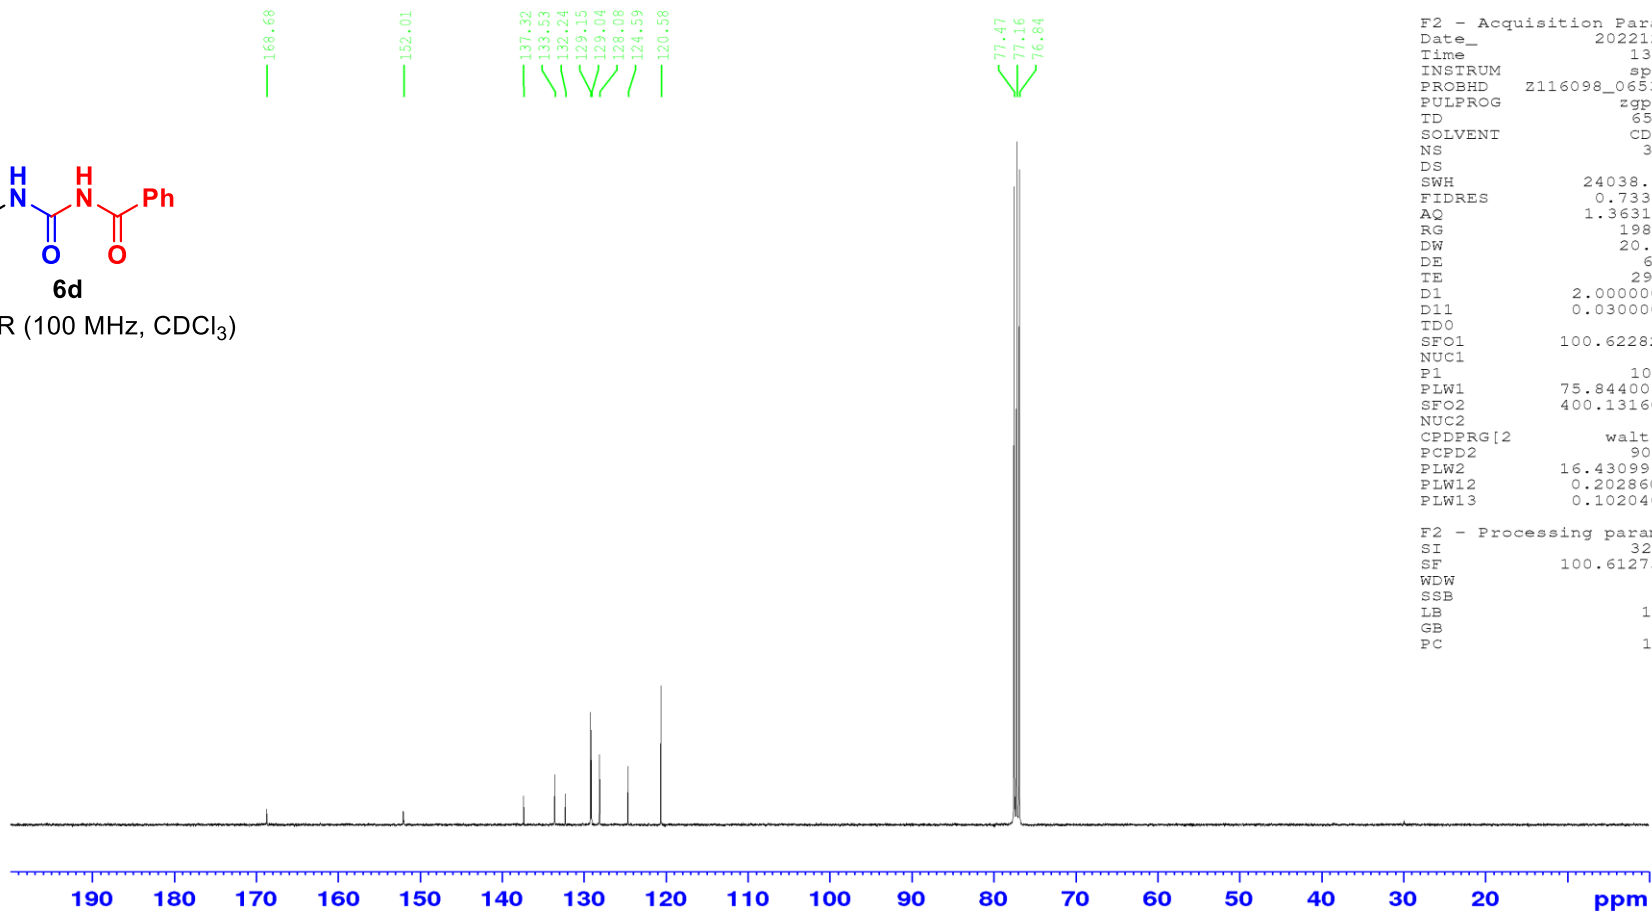

Current Data Parameters  
 NAME lyr-20221220-2  
 EXPNO 2  
 PROCNO 1

F2 - Acquisition Parameters  
 Date\_ 20221220  
 Time 13.51 h  
 INSTRUM spect  
 PROBHD Z116098\_0653 (  
 PULPROG zgpg30  
 TD 65536  
 SOLVENT CDCl3  
 NS 3333  
 DS 4  
 SWH 24038.461 Hz  
 FIDRES 0.733596 Hz  
 AQ 1.3631488 sec  
 RG 198.36  
 DW 20.800 usec  
 DE 6.50 usec  
 TE 293.6 K  
 D1 2.00000000 sec  
 D11 0.03000000 sec  
 TD0 1  
 SFO1 100.6228298 MHz  
 NUC1 13C  
 P1 10.00 usec  
 PLW1 75.84400177 W  
 SFO2 400.1316005 MHz  
 NUC2 1H  
 CPDPRG[2] waltz16  
 PCPD2 90.00 usec  
 PLW2 16.43099976 W  
 PLW12 0.20286000 W  
 PLW13 0.10204000 W

F2 - Processing parameters  
 SI 32768  
 SF 100.6127571 MHz  
 WDW EM  
 SSB 0  
 LB 1.00 Hz  
 GB 0  
 FC 1.40

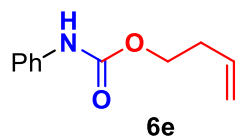

6e

<sup>1</sup>H NMR (400 MHz, CDCl<sub>3</sub>)

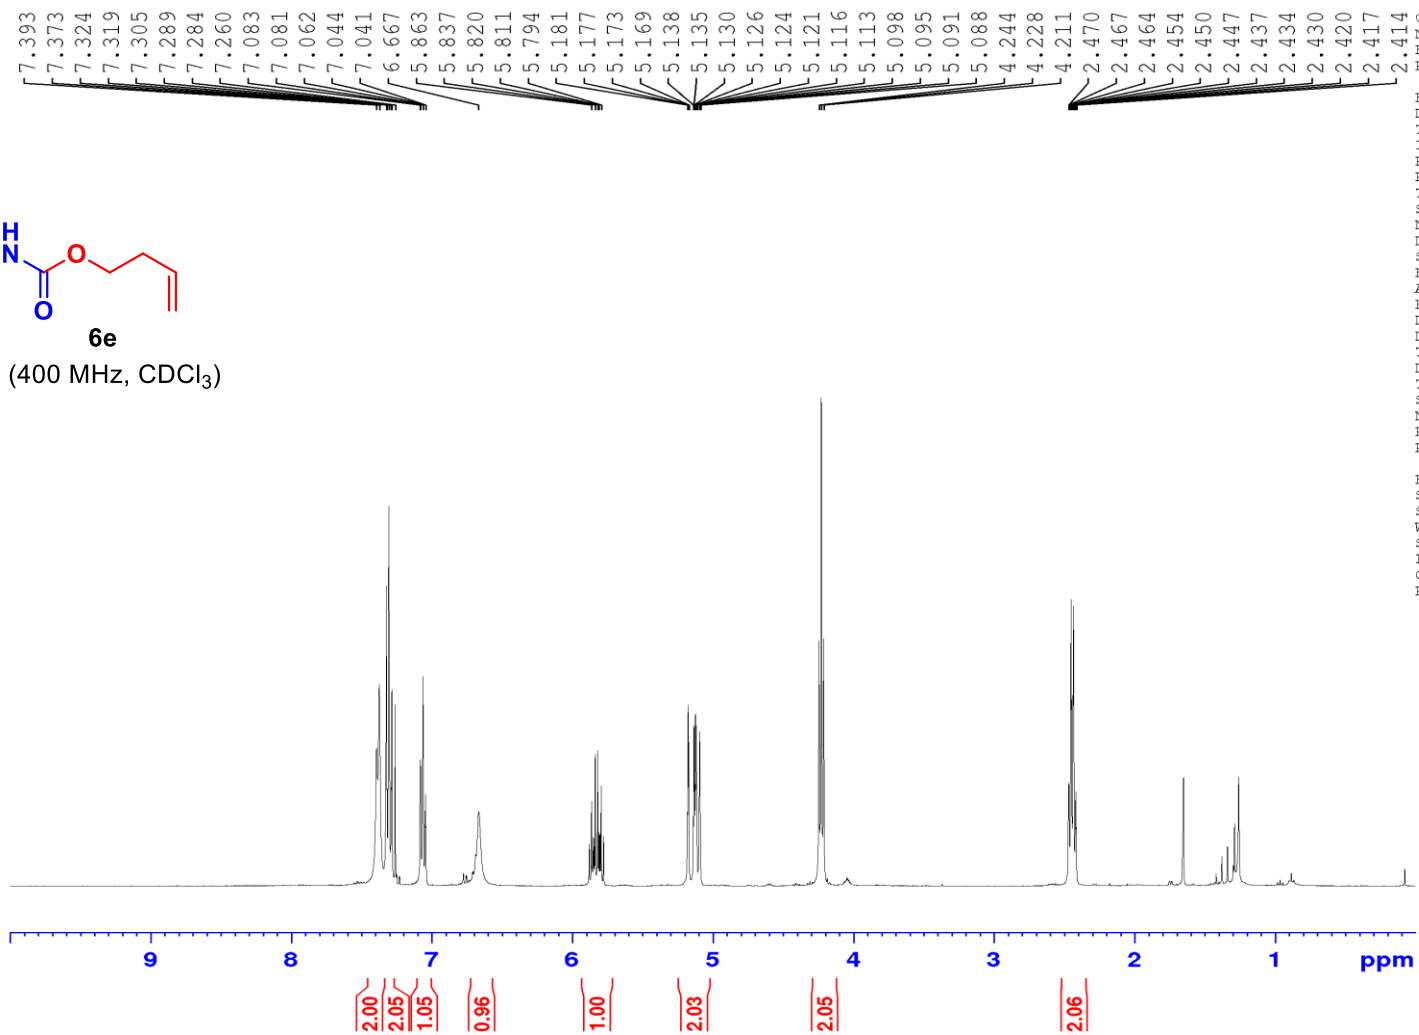

```

Current Data Parameters
NAME          lyr-20230303-1
EXPNO         1
PROCNO        1

F2 - Acquisition Parameters
Date_         20230303
Time          22.20 h
INSTRUM       spect
PROBHD        Z116098_0653 (
PULPROG       zg30
TD            65536
SOLVENT       CDCl3
NS            16
DS            2
SWH           8012.820 Hz
FIDRES        0.244532 Hz
AQ            4.0894465 sec
RG            62.98
DW            62.400 usec
DE            6.50 usec
TE            292.4 K
D1            1.00000000 sec
TD0           1
SFO1          400.1324708 MHz
NUC1          1H
P1            10.00 usec
PLW1          16.43099976 W

F2 - Processing parameters
SI            65536
SF            400.1300097 MHz
WDW           EM
SSB           0
LB            0.30 Hz
GB            0
PC            1.00
  
```

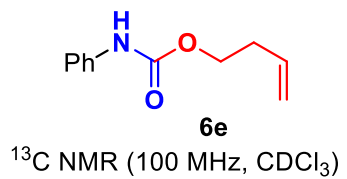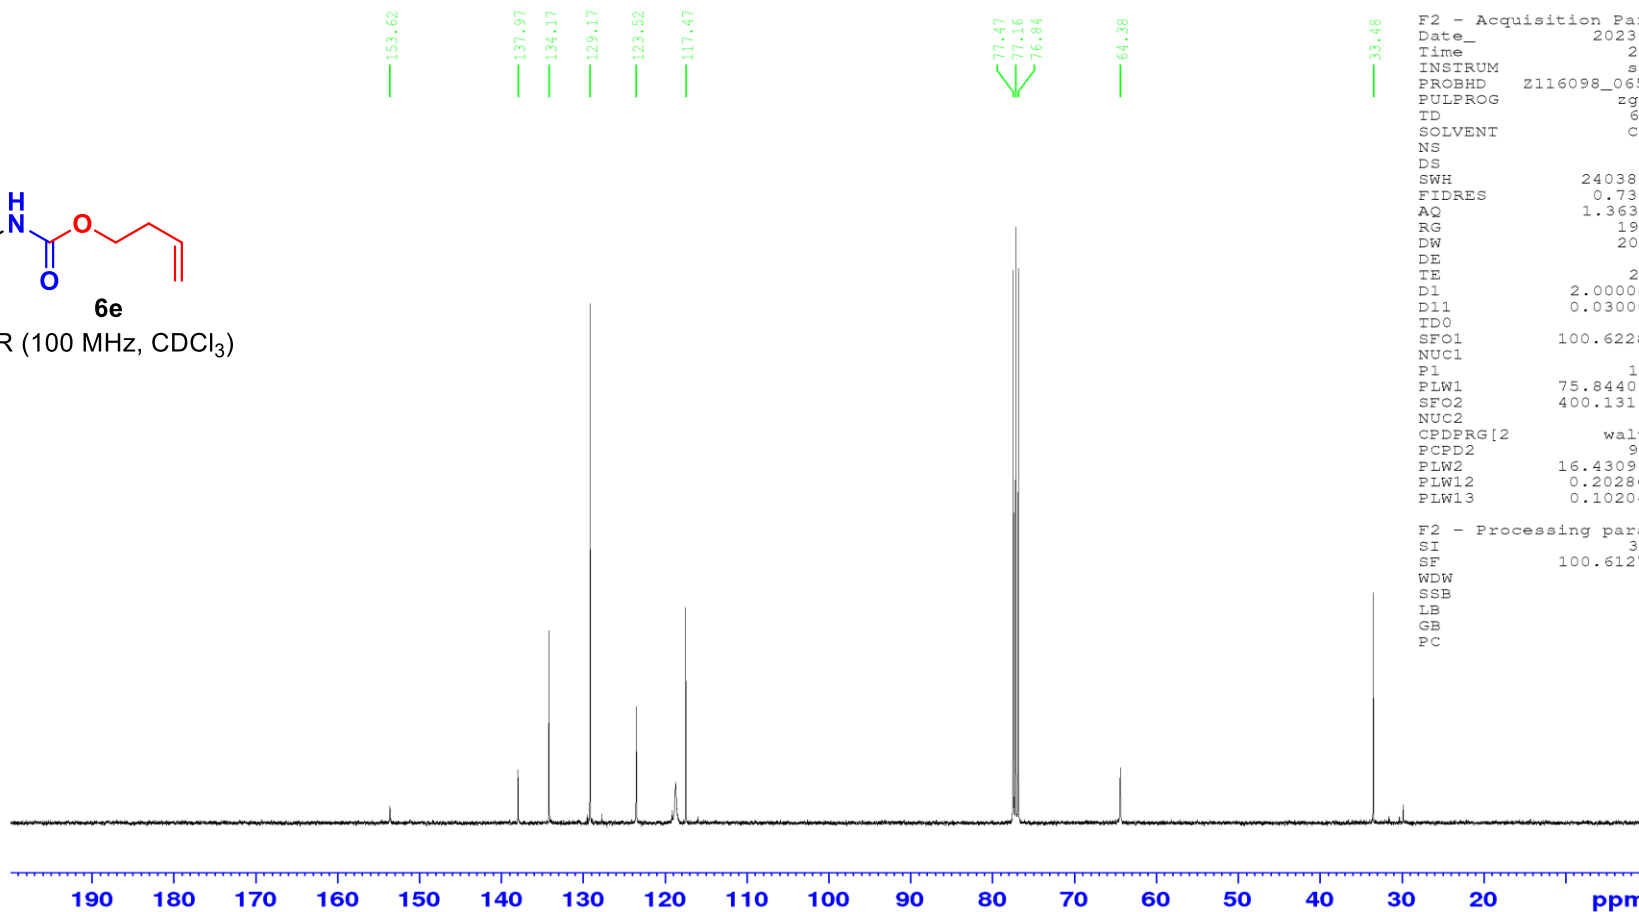

Current Data Parameters  
 NAME lyr-20230303-1  
 EXPNO 2  
 PROCNO 1

F2 - Acquisition Parameters  
 Date\_ 20230303  
 Time 23.20 h  
 INSTRUM spect  
 PROBHD Z116098\_0653 (  
 PULPROG zgpg30  
 TD 65536  
 SOLVENT CDCl3  
 NS 1024  
 DS 4  
 SWH 24038.461 Hz  
 FIDRES 0.733596 Hz  
 AQ 1.3631488 sec  
 RG 198.36  
 DW 20.800 usec  
 DE 6.50 usec  
 TE 293.0 K  
 D1 2.00000000 sec  
 D11 0.03000000 sec  
 TD0 1  
 SFO1 100.6228298 MHz  
 NUC1 13C  
 P1 10.00 usec  
 PLW1 75.84400177 W  
 SFO2 400.1316005 MHz  
 NUC2 1H  
 CPDPRG[2] waltz16  
 FCPD2 90.00 usec  
 PLW2 16.43099976 W  
 PLW12 0.20286000 W  
 PLW13 0.10204000 W

F2 - Processing parameters  
 SI 32768  
 SF 100.6127594 MHz  
 WDW EM  
 SSB 0  
 LB 1.00 Hz  
 GB 0  
 PC 1.40

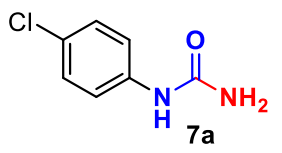

<sup>1</sup>H NMR (400 MHz, DMSO-d<sub>6</sub>)

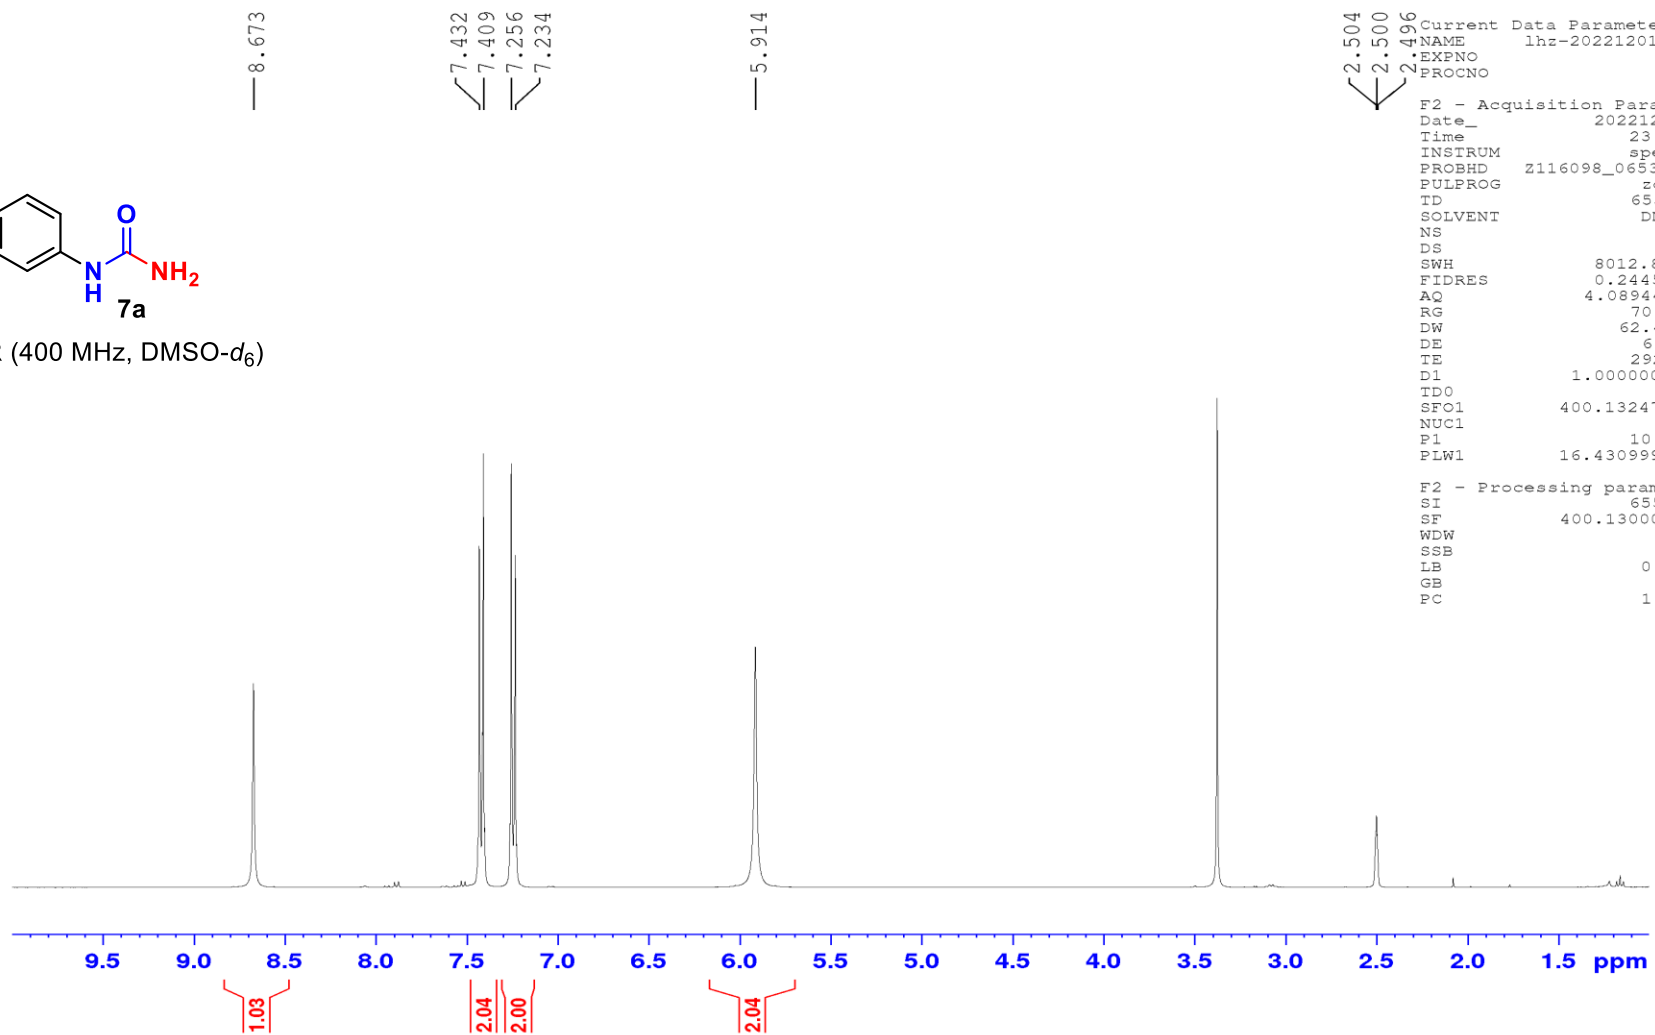

```

Current Data Parameters
Date_          20221201
Time           23.46 h
INSTRUM        spect
PROBHD         Z116098_0653 (
PULPROG        zg30
TD             65536
SOLVENT        DMSO
NS             16
DS             2
SWH            8012.820 Hz
FIDRES         0.244532 Hz
AQ             4.0894465 sec
RG             70.89
DW             62.400 usec
DE             6.50 usec
TE             292.9 K
D1             1.00000000 sec
TD0            1
SFO1           400.1324708 MHz
NUC1           1H
P1             10.00 usec
PLW1           16.43099976 W

F2 - Acquisition Parameters
Date_          20221201
Time           23.46 h
INSTRUM        spect
PROBHD         Z116098_0653 (
PULPROG        zg30
TD             65536
SOLVENT        DMSO
NS             16
DS             2
SWH            8012.820 Hz
FIDRES         0.244532 Hz
AQ             4.0894465 sec
RG             70.89
DW             62.400 usec
DE             6.50 usec
TE             292.9 K
D1             1.00000000 sec
TD0            1
SFO1           400.1324708 MHz
NUC1           1H
P1             10.00 usec
PLW1           16.43099976 W

F2 - Processing parameters
SI             65536
SF             400.1300033 MHz
WDW            EM
SSB            0
LB             0.30 Hz
GB             0
PC             1.00
  
```

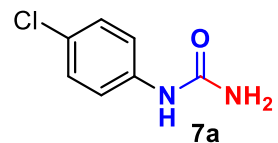

$^{13}\text{C}$  NMR (100 MHz,  $\text{DMSO}-d_6$ )

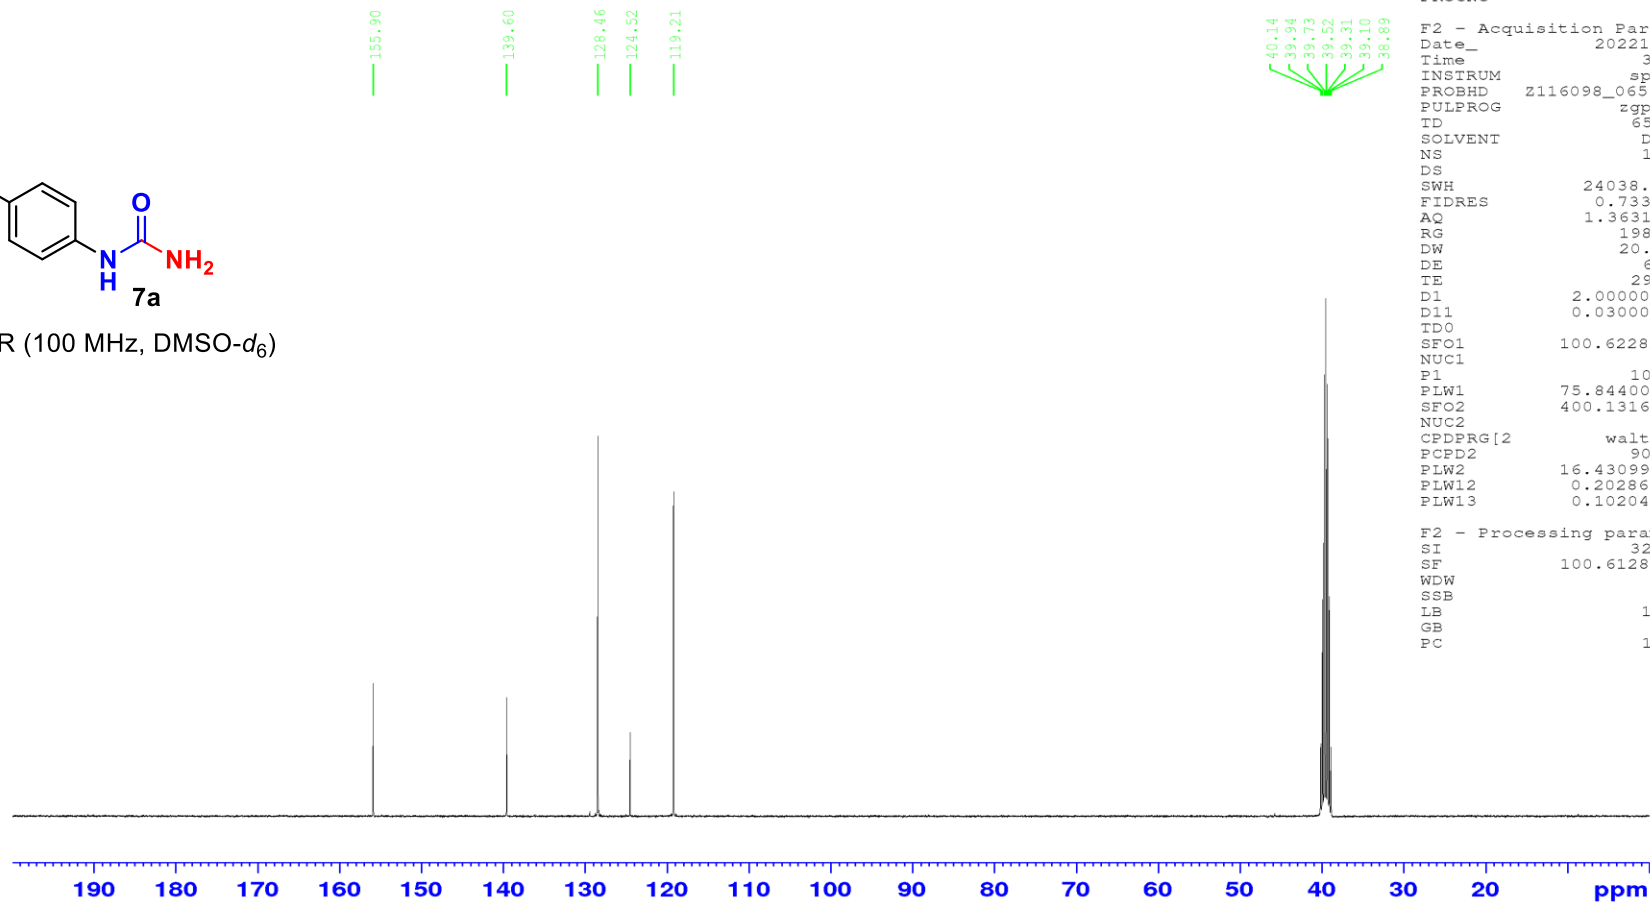

Current Data Parameters  
 NAME lhz-20221201-1  
 EXPNO 2  
 PROCNO 1

F2 - Acquisition Parameters  
 Date\_ 20221202  
 Time 3.03 h  
 INSTRUM spect  
 PROBHD Z116098\_0653 (  
 PULPROG zgpg30  
 TD 65536  
 SOLVENT DMSO  
 NS 1333  
 DS 4  
 SWH 24038.461 Hz  
 FIDRES 0.733596 Hz  
 AQ 1.3631488 sec  
 RG 198.36  
 DW 20.800 usec  
 DE 6.50 usec  
 TE 293.6 K  
 D1 2.00000000 sec  
 D11 0.03000000 sec  
 TD0 1  
 SFO1 100.6228298 MHz  
 NUC1 13C  
 P1 10.00 usec  
 PLW1 75.84400177 W  
 SFO2 400.1316005 MHz  
 NUC2 1H  
 CPDPRG[2] waltz16  
 FCPD2 90.00 usec  
 PLW2 16.43099976 W  
 PLW12 0.20286000 W  
 PLW13 0.10204000 W

F2 - Processing parameters  
 SI 32768  
 SF 100.6128110 MHz  
 WDW EM  
 SSB 0  
 LB 1.00 Hz  
 GB 0  
 FC 1.40



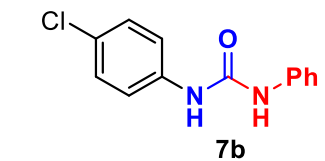

<sup>1</sup>H NMR (400 MHz, DMSO-d<sub>6</sub>)

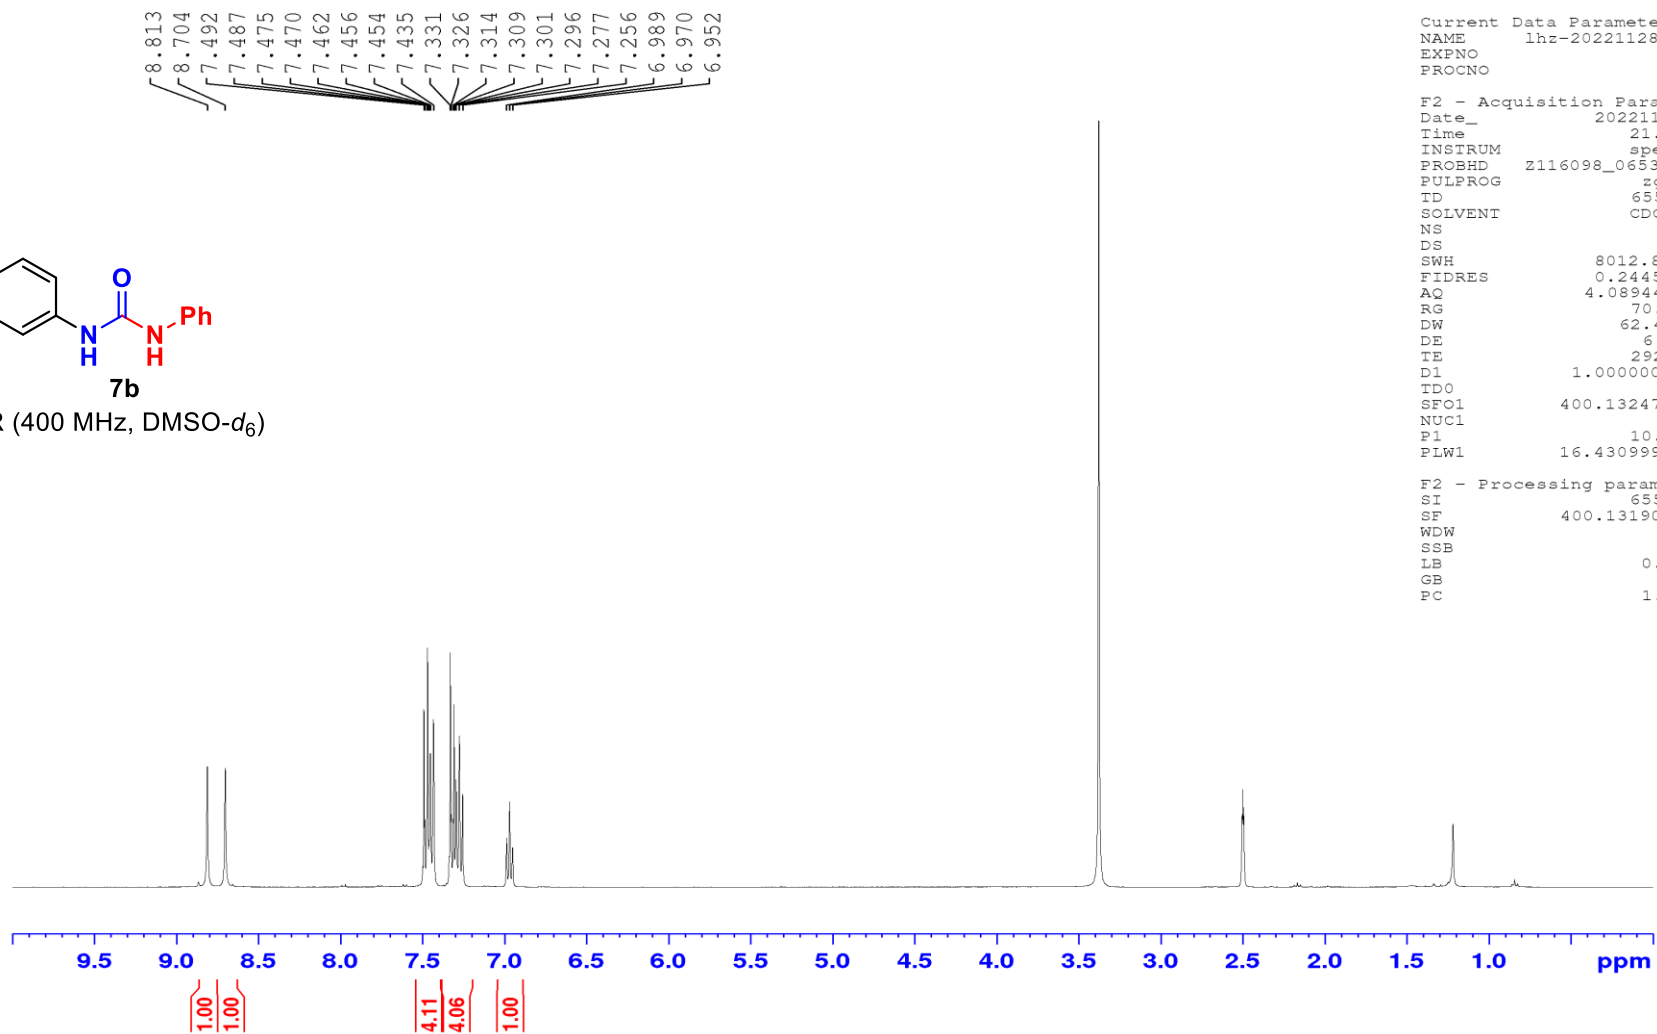

Current Data Parameters  
 NAME lhz-20221128-1  
 EXPNO 1  
 PROCNO 1

F2 - Acquisition Parameters  
 Date\_ 20221128  
 Time 21.38 h  
 INSTRUM spect  
 PROBHD Z116098\_0653 (  
 PULPROG zg30  
 TD 65536  
 SOLVENT CDCl3  
 NS 8  
 DS 2  
 SWH 8012.820 Hz  
 FIDRES 0.244532 Hz  
 AQ 4.0894465 sec  
 RG 70.89  
 DW 62.400 usec  
 DE 6.50 usec  
 TE 292.7 K  
 D1 1.00000000 sec  
 TD0 1  
 SFO1 400.1324708 MHz  
 NUC1 1H  
 P1 10.00 usec  
 PLW1 16.43099976 W

F2 - Processing parameters  
 SI 65536  
 SF 400.1319040 MHz  
 WDW EM  
 SSB 0  
 LB 0.30 Hz  
 GB 0  
 FC 1.00

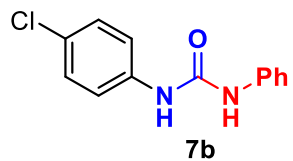

**7b**  
<sup>13</sup>C NMR (100 MHz, DMSO-d<sub>6</sub>)

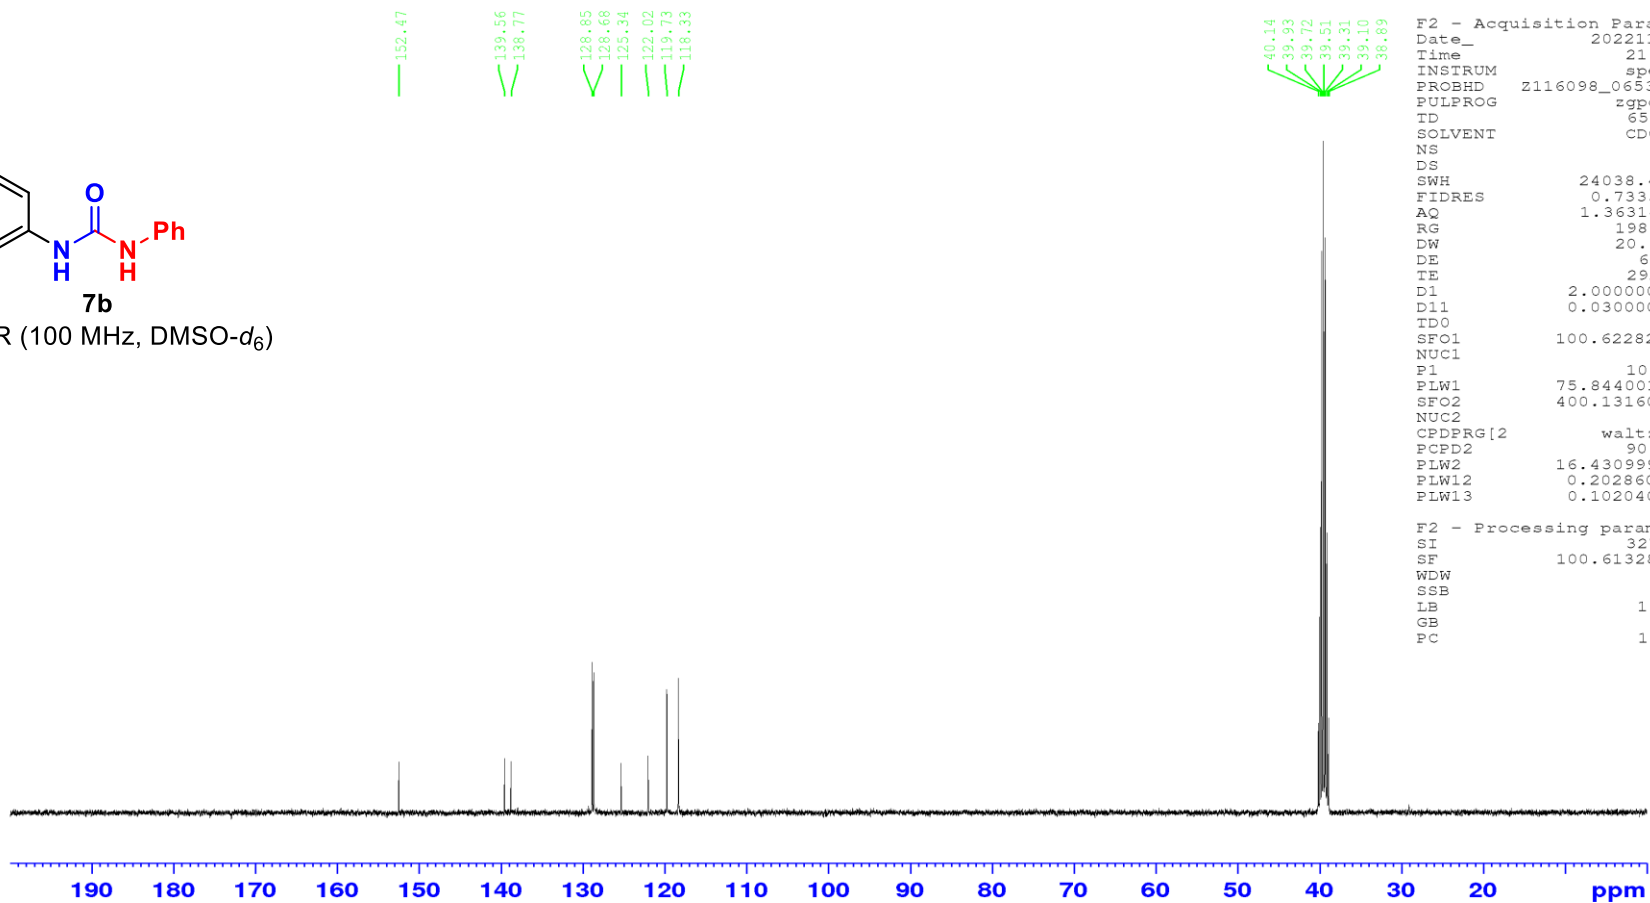

Current Data Parameters  
 NAME lhz-20221128-1  
 EXPNO 2  
 PROCNO 1

F2 - Acquisition Parameters  
 Date\_ 20221128  
 Time\_ 21.50 h  
 INSTRUM spect  
 PROBHD Z116098\_0653 (  
 PULPROG zgpg30  
 TD 65536  
 SOLVENT CDCl3  
 NS 188  
 DS 4  
 SWH 24038.461 Hz  
 FIDRES 0.733596 Hz  
 AQ 1.3631488 sec  
 RG 198.36  
 DW 20.800 usec  
 DE 6.50 usec  
 TE 292.8 K  
 D1 2.00000000 sec  
 D11 0.03000000 sec  
 TD0 1  
 SFO1 100.6228298 MHz  
 NUC1 13c  
 P1 10.00 usec  
 PLW1 75.84400177 W  
 SFO2 400.1316005 MHz  
 NUC2 1H  
 CPDPRG[2] waltz16  
 FCPD2 90.00 usec  
 PLW2 16.43099976 W  
 PLW12 0.20286000 W  
 PLW13 0.10204000 W

F2 - Processing parameters  
 SI 32768  
 SF 100.6132885 MHz  
 WDW EM  
 SSB 0  
 LB 1.00 Hz  
 GB 0  
 FC 1.40

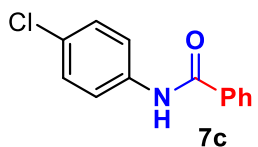

<sup>1</sup>H NMR (400 MHz, DMSO-d<sub>6</sub>)

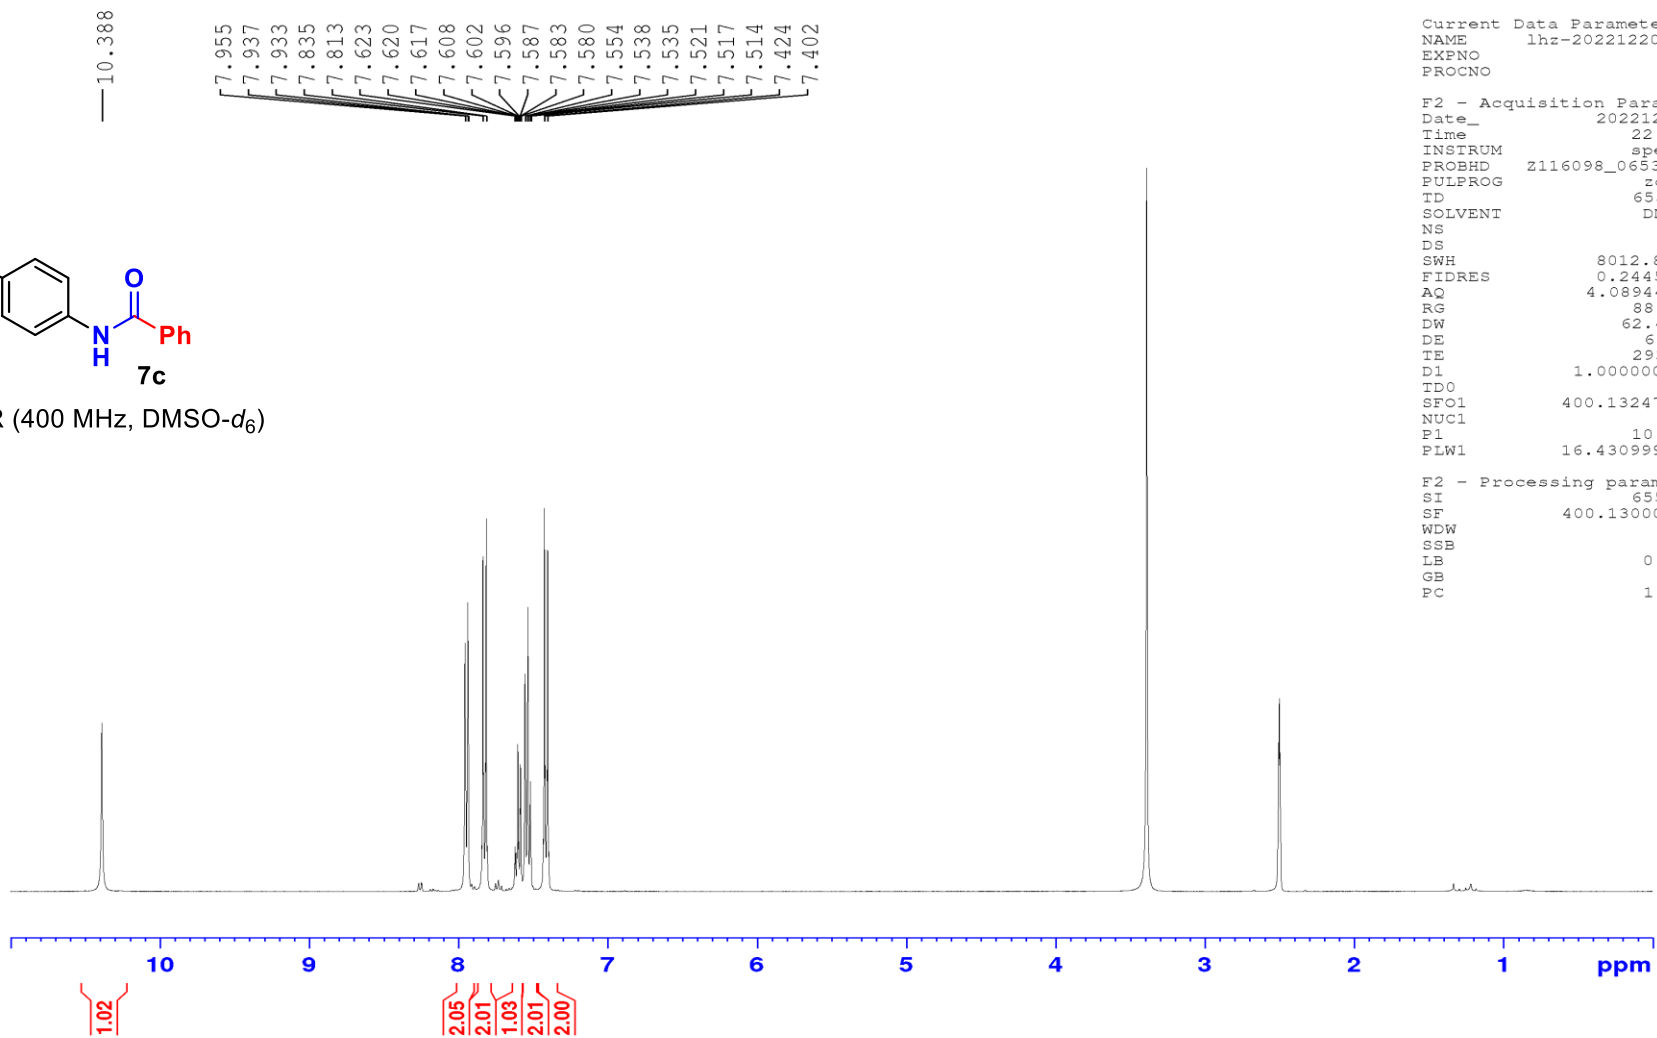

Current Data Parameters  
NAME lhz-20221220-8  
EXPNO 1  
PROCNO 1

F2 - Acquisition Parameters  
Date\_ 20221220  
Time 22.18 h  
INSTRUM spect  
PROBHD Z116098\_0653 (  
PULPROG zg30  
TD 65536  
SOLVENT DMSO  
NS 16  
DS 2  
SWH 8012.820 Hz  
FIDRES 0.244532 Hz  
AQ 4.0894465 sec  
RG 88.22  
DW 62.400 usec  
DE 6.50 usec  
TE 293.0 K  
D1 1.00000000 sec  
TD0 1  
SFO1 400.1324708 MHz  
NUC1 1H  
P1 10.00 usec  
PLW1 16.43099976 W

F2 - Processing parameters  
SI 65536  
SF 400.1300032 MHz  
WDW EM  
SSB 0  
LB 0.30 Hz  
GB 0  
PC 1.00

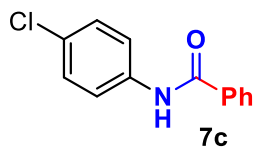

7c

<sup>13</sup>C NMR (100 MHz, DMSO-d<sub>6</sub>)

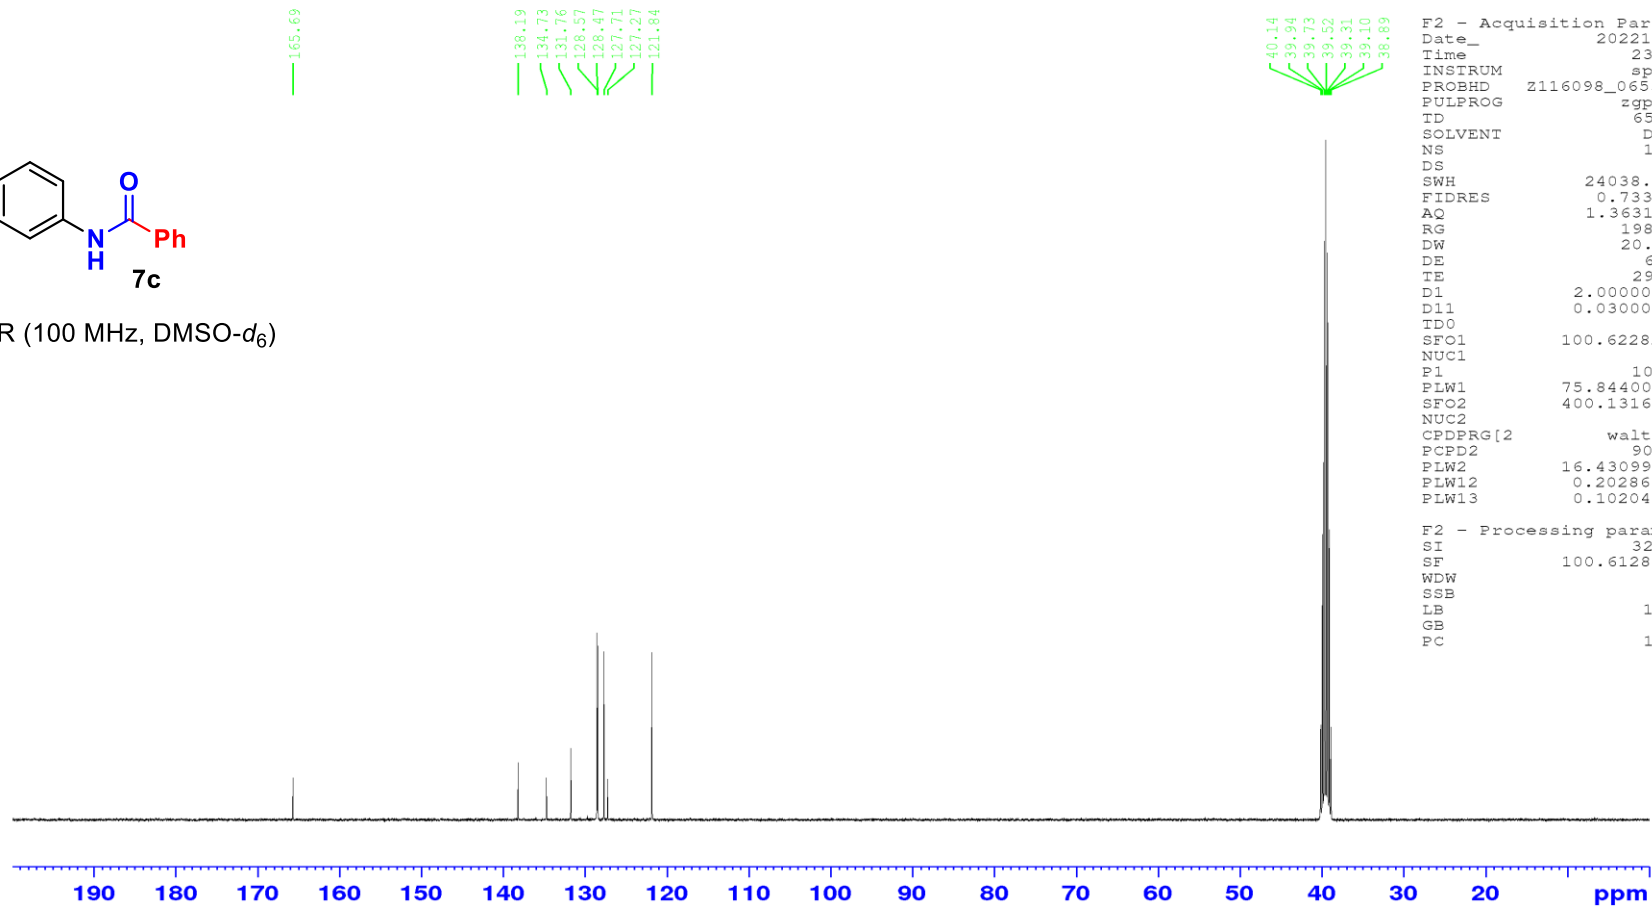

```

Current Data Parameters
NAME      lhz-20221220-8
EXPNO    2
PROCNO   1

F2 - Acquisition Parameters
Date_    20221220
Time     23.17 h
INSTRUM  spect
PROBHD   Z116098_0653 (
PULPROG  zgpg30
TD       65536
SOLVENT  DMSO
NS       1024
DS       4
SWH      24038.461 Hz
FIDRES   0.733596 Hz
AQ       1.3631488 sec
RG       198.36
DW       20.800 usec
DE       6.50 usec
TE       293.6 K
D1       2.00000000 sec
D11      0.03000000 sec
TD0      1
SFO1     100.6228298 MHz
NUC1     13c
P1       10.00 usec
PLW1     75.84400177 W
SFO2     400.1316005 MHz
NUC2     1H
CPDPRG[2] waltz16
PCPD2    90.00 usec
PLW2     16.43099976 W
PLW12    0.20286000 W
PLW13    0.10204000 W

F2 - Processing parameters
SI       32768
SF       100.6128124 MHz
WDW      EM
SSB      0
LB       1.00 Hz
GB       0
FC       1.40
  
```

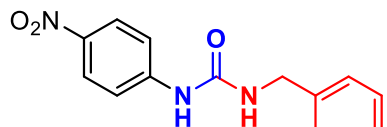

Vacor (7d)

<sup>1</sup>H NMR (400 MHz, DMSO-d<sub>6</sub>)

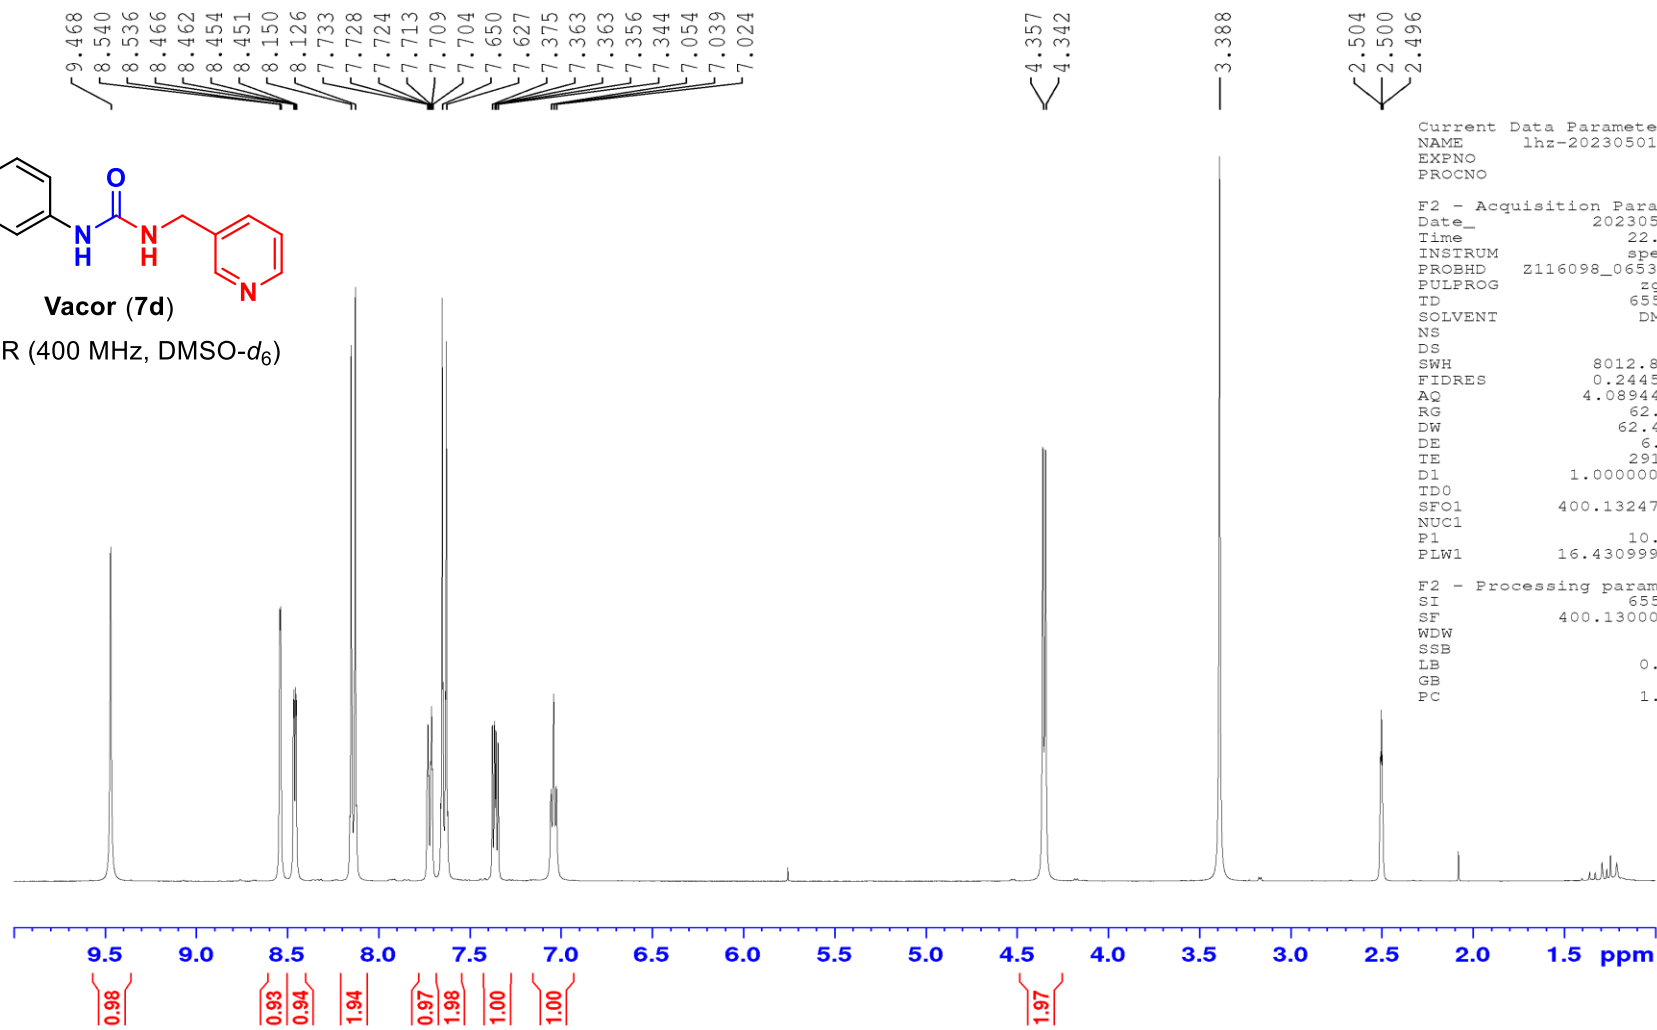

```

Current Data Parameters
NAME      lhz-20230501-1
EXPNO    1
PROCNO   1

F2 - Acquisition Parameters
Date_    20230501
Time     22.23 h
INSTRUM  spect
PROBHD   Z116098_0653 (
PULPROG  zg30
TD       65536
SOLVENT  DMSO
NS       16
DS       2
SWH      8012.820 Hz
FIDRES   0.244532 Hz
AQ       4.0894465 sec
RG       62.98
DW       62.400 usec
DE       6.50 usec
TE       291.8 K
D1       1.00000000 sec
TD0      1
SFO1     400.1324708 MHz
NUC1     1H
P1       10.00 usec
PLW1     16.43099976 W

F2 - Processing parameters
SI       65536
SF       400.1300033 MHz
WDW      EM
SSB      0
LB       0.30 Hz
GB       0
PC       1.00
  
```

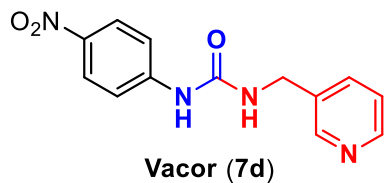

**Vacor (7d)**

$^{13}\text{C}$  NMR (100 MHz,  $\text{DMSO-}d_6$ )

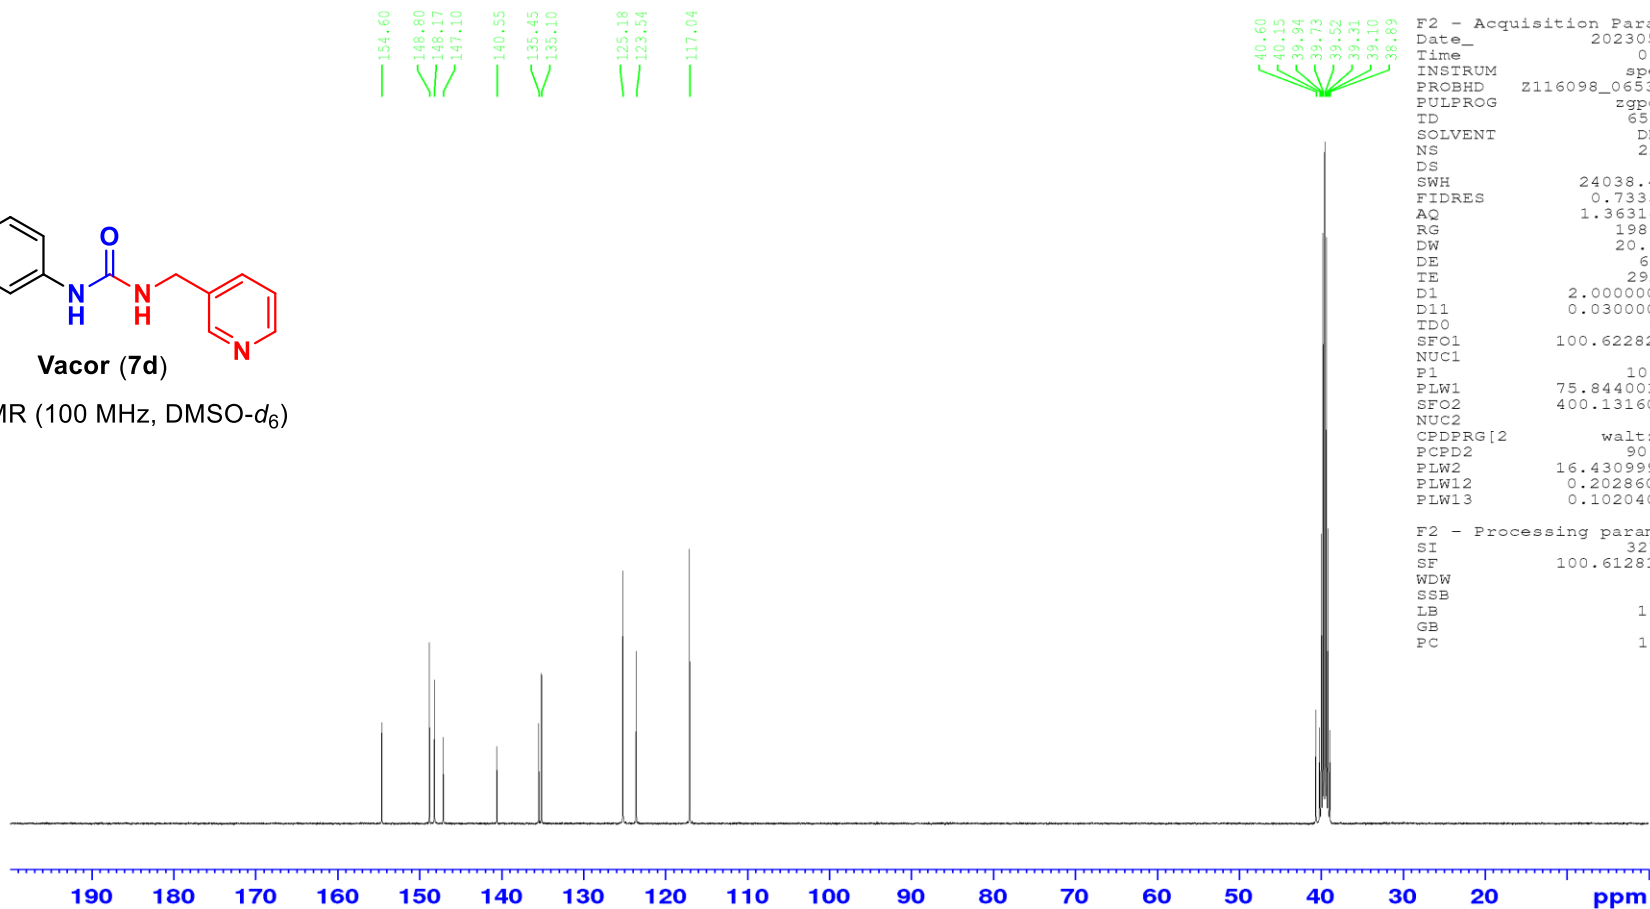

Current Data Parameters  
 NAME lhz-20230501-1  
 EXPNO 2  
 PROCNO 1

F2 - Acquisition Parameters  
 Date\_ 20230502  
 Time 0.31 h  
 INSTRUM spect  
 PROBHD Z116098\_0653 (  
 PULPROG zgpg30  
 TD 65536  
 SOLVENT DMSO  
 NS 2222  
 DS 4  
 SWH 24038.461 Hz  
 FIDRES 0.733596 Hz  
 AQ 1.3631488 sec  
 RG 198.36  
 DW 20.800 usec  
 DE 6.50 usec  
 TE 292.7 K  
 D1 2.00000000 sec  
 D11 0.03000000 sec  
 TD0 1  
 SFO1 100.6228298 MHz  
 NUC1 13C  
 P1 10.00 usec  
 PLW1 75.84400177 W  
 SFO2 400.1316005 MHz  
 NUC2 1H  
 CPDPRG[2] waltz16  
 PCPD2 90.00 usec  
 PLW2 16.43099976 W  
 PLW12 0.20286000 W  
 PLW13 0.10204000 W

F2 - Processing parameters  
 SI 32768  
 SF 100.6128102 MHz  
 WDW EM  
 SSB 0  
 LB 1.00 Hz  
 GB 0  
 FC 1.40

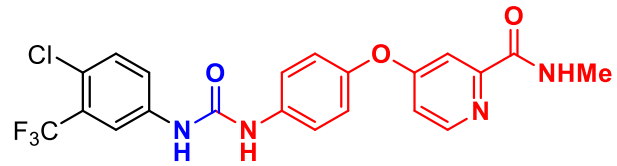

**Sorafenib (7e)**

$^1\text{H}$  NMR (400 MHz,  $\text{DMSO-}d_6$ )

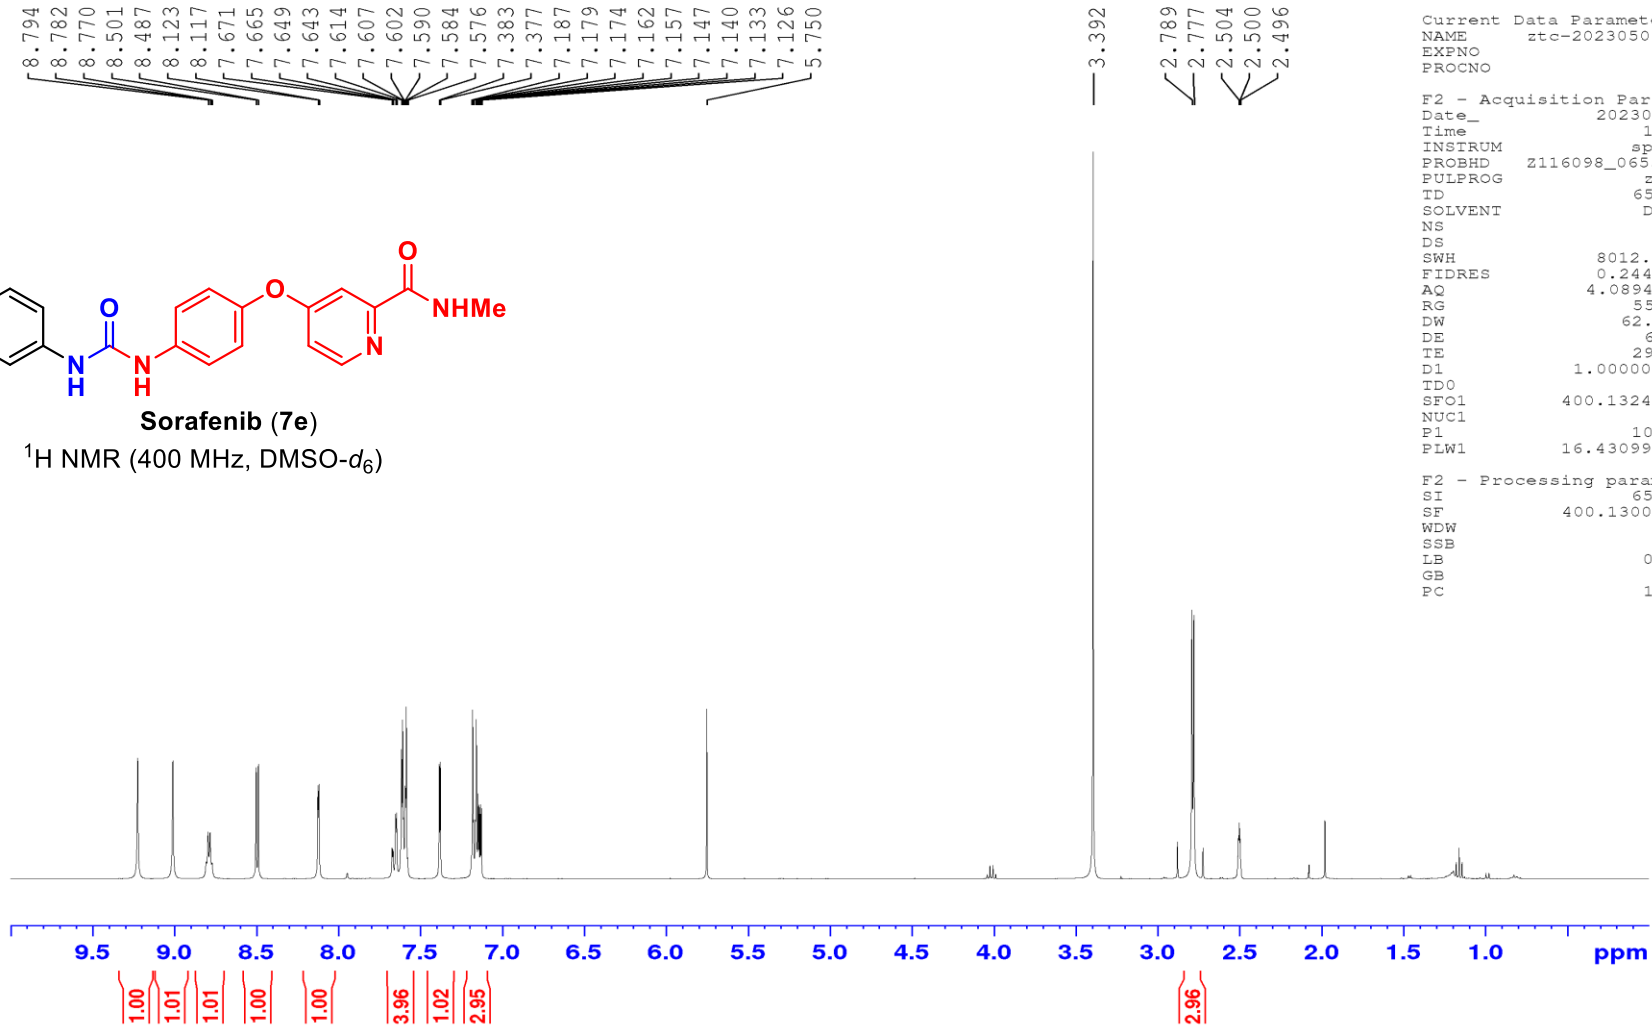

```

Current Data Parameters
NAME          ztc-20230504-2
EXPNO         1
PROCNO        1

F2 - Acquisition Parameters
Date_         20230505
Time          1.39 h
INSTRUM       spect
PROBHD        Z116098_0653 (
PULPROG       zg30
TD            65536
SOLVENT       DMSO
NS            16
DS            2
SWH           8012.820 Hz
FIDRES        0.244532 Hz
AQ            4.0894465 sec
RG            55.99
DW            62.400 usec
DE            6.50 usec
TE            291.8 K
D1            1.00000000 sec
TD0           1
SFO1          400.1324708 MHz
NUC1          1H
P1            10.00 usec
PLW1          16.43099976 W

F2 - Processing parameters
SI            65536
SF            400.1300033 MHz
WDW           EM
SSB           0
LB            0.30 Hz
GB            0
PC            1.00
  
```

Current Data Parameters  
NAME ztc-20230504-2  
EXPNO 3  
PROCNO 1

F2 - Acquisition Parameters  
Date\_ 20230506  
Time 7.03 h  
INSTRUM spect  
PROBHD Z116098\_0653 (  
PULPROG zgpg30  
TD 65536  
SOLVENT DMSO  
NS 3000  
DS 4  
SWH 24038.461 Hz  
FIDRES 0.733596 Hz  
AQ 1.3631488 sec  
RG 198.36  
DW 20.800 usec  
DE 6.50 usec  
TE 292.3 K  
D1 2.00000000 sec  
D11 0.03000000 sec  
TDO 1  
SFO1 100.6228298 MHz  
NUC1 13C  
P1 10.00 usec  
PLW1 75.84400177 W  
SFO2 400.1316005 MHz  
NUC2 1H  
CPDPRG[2] waltz16  
PCPD2 90.00 usec  
PLW2 16.43099976 W  
PLW12 0.20286000 W  
PLW13 0.10204000 W

F2 - Processing parameters  
SI 32768  
SF 100.6128087 MHz  
WDW EM  
SSB 0  
LB 1.00 Hz  
GB 0  
PC 1.40

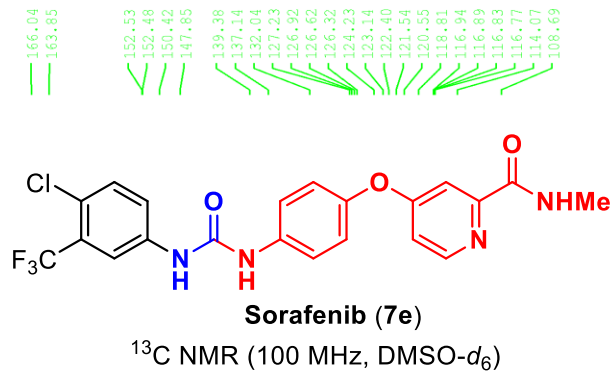

40.14  
39.93  
39.73  
39.52  
39.31  
39.10  
38.89  
26.06

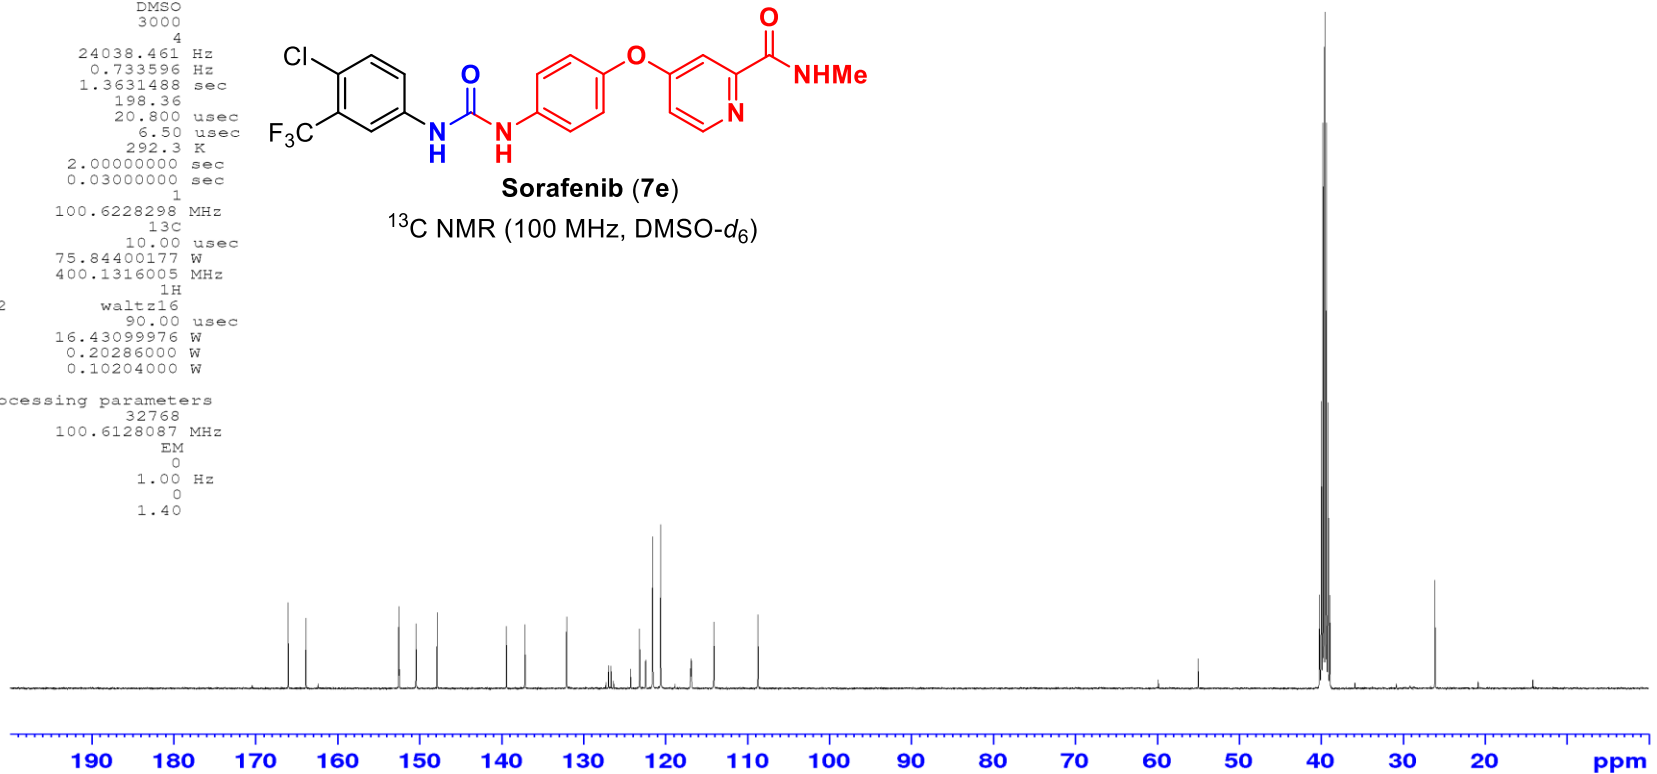



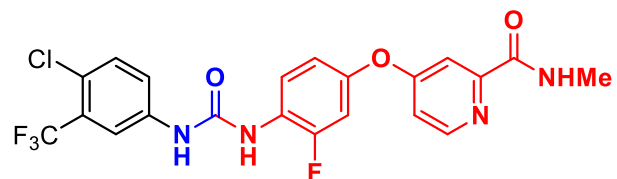

**Regorafenib (7f)**

$^1\text{H}$  NMR (400 MHz, DMSO- $d_6$ )

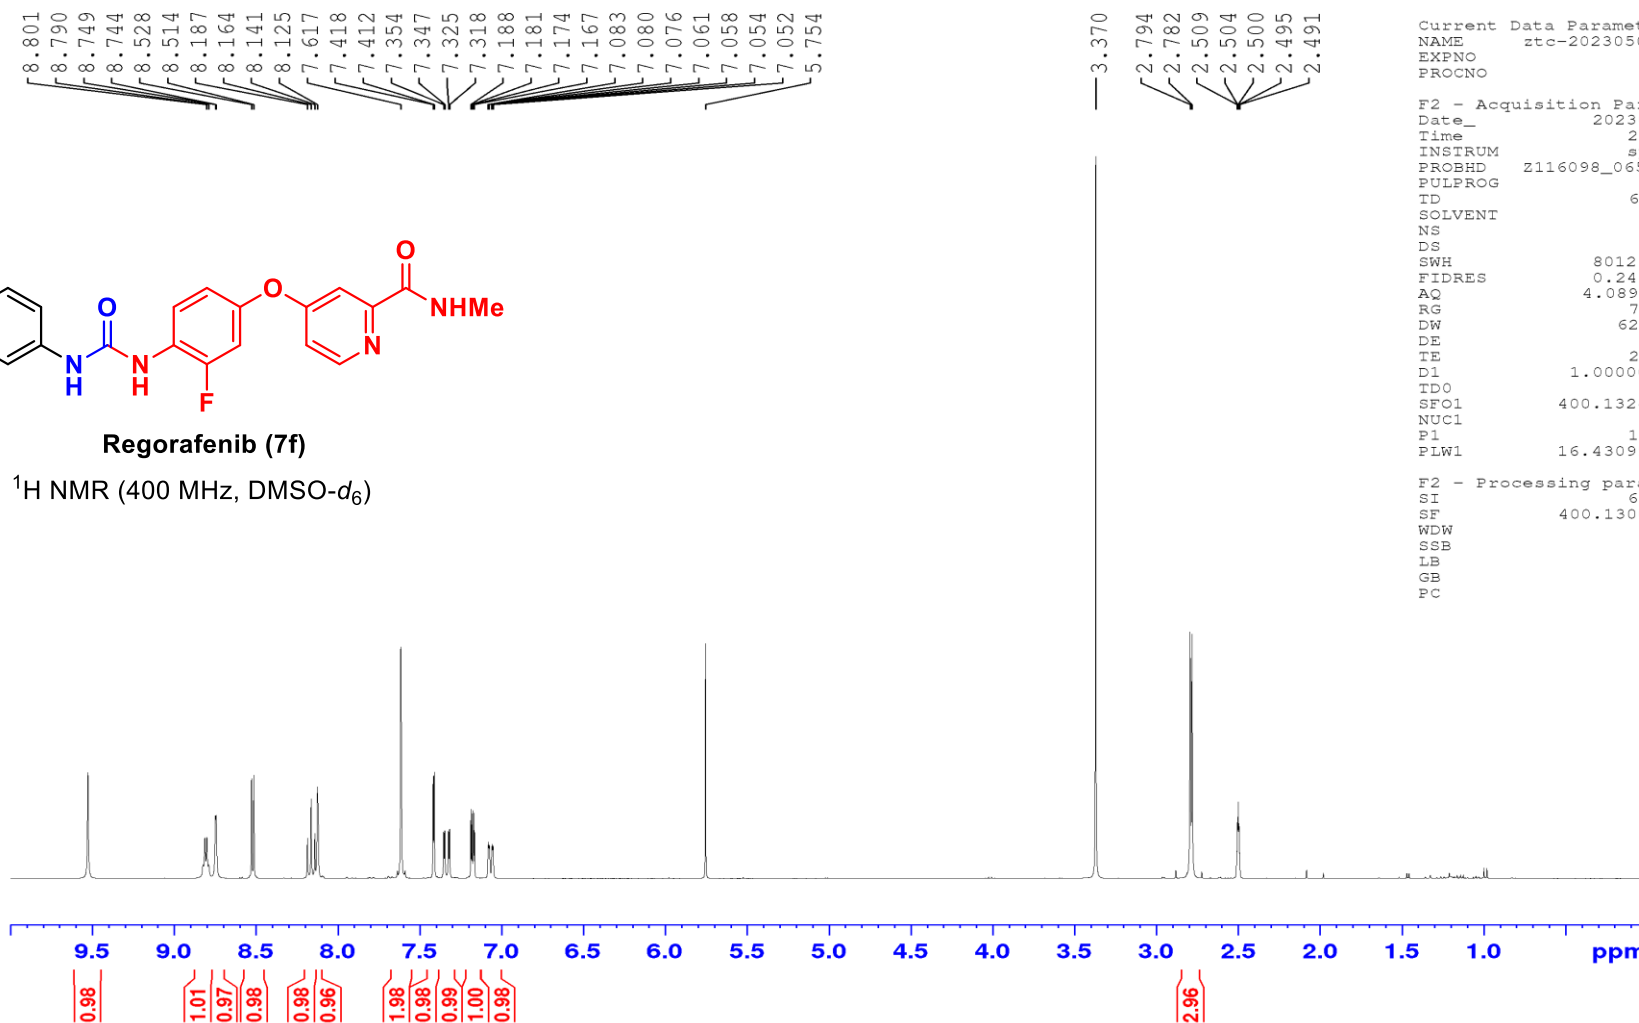

Current Data Parameters  
 NAME ztc-20230509-1  
 EXPNO 1  
 PROCNO 1

F2 - Acquisition Parameters  
 Date\_ 20230509  
 Time 22.22 h  
 INSTRUM spect  
 PROBHD Z116098\_0653 (  
 PULPROG zg30  
 TD 65536  
 SOLVENT DMSO  
 NS 16  
 DS 2  
 SWH 8012.820 Hz  
 FIDRES 0.244532 Hz  
 AQ 4.0894465 sec  
 RG 70.89  
 DW 62.400 usec  
 DE 6.50 usec  
 TE 291.8 K  
 D1 1.00000000 sec  
 TD0 1  
 SFO1 400.1324708 MHz  
 NUC1  $^1\text{H}$   
 P1 10.00 usec  
 PLW1 16.43099976 W

F2 - Processing parameters  
 SI 65536  
 SF 400.1300033 MHz  
 WDW EM  
 SSB 0  
 LB 0.30 Hz  
 GB 0  
 FC 1.00

Current Data Parameters  
NAME ztc-20230509-1  
EXPNO 2  
PROCNO 1

F2 - Acquisition Parameters  
Date\_ 20230510  
Time 1.33 h  
INSTRUM spect  
PROBHD Z116098\_0653 (  
PULPROG zgpg30  
TD 65536  
SOLVENT DMSO  
NS 3333  
DS 4  
SWH 24038.461 Hz  
FIDRES 0.733596 Hz  
AQ 1.3631488 sec  
RG 198.36  
DW 20.800 usec  
DE 6.50 usec  
TE 292.6 K  
D1 2.00000000 sec  
D11 0.03000000 sec  
TD0 1  
SFO1 100.6228298 MHz  
NUC1 13C  
P1 10.00 usec  
PLW1 75.84400177 W  
SFO2 400.1316005 MHz  
NUC2 1H  
CPDPRG[2] waltz16  
PCPD2 90.00 usec  
PLW2 16.43099976 W  
PLW12 0.20286000 W  
PLW13 0.10204000 W

F2 - Processing parameters  
SI 32768  
SF 100.6128102 MHz  
WDW EM  
SSB 0  
LB 1.00 Hz  
GB 0  
PC 1.40

165.54  
163.76  
154.00  
152.56  
152.20  
151.56  
150.53  
148.18  
148.07  
139.05  
132.15  
127.30  
127.00  
126.89  
126.69  
126.39  
125.03  
124.92  
124.18  
123.00  
122.65  
122.56  
122.54  
121.47  
118.76  
117.19  
117.16  
116.68  
116.62  
116.56  
114.18  
109.29  
109.07  
108.94

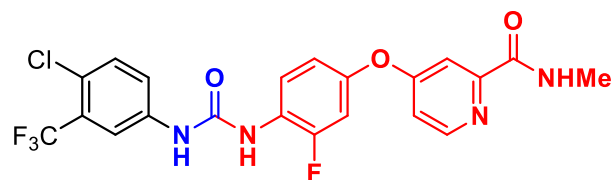

Regorafenib (7f)

<sup>13</sup>C NMR (100 MHz, DMSO-d<sub>6</sub>)

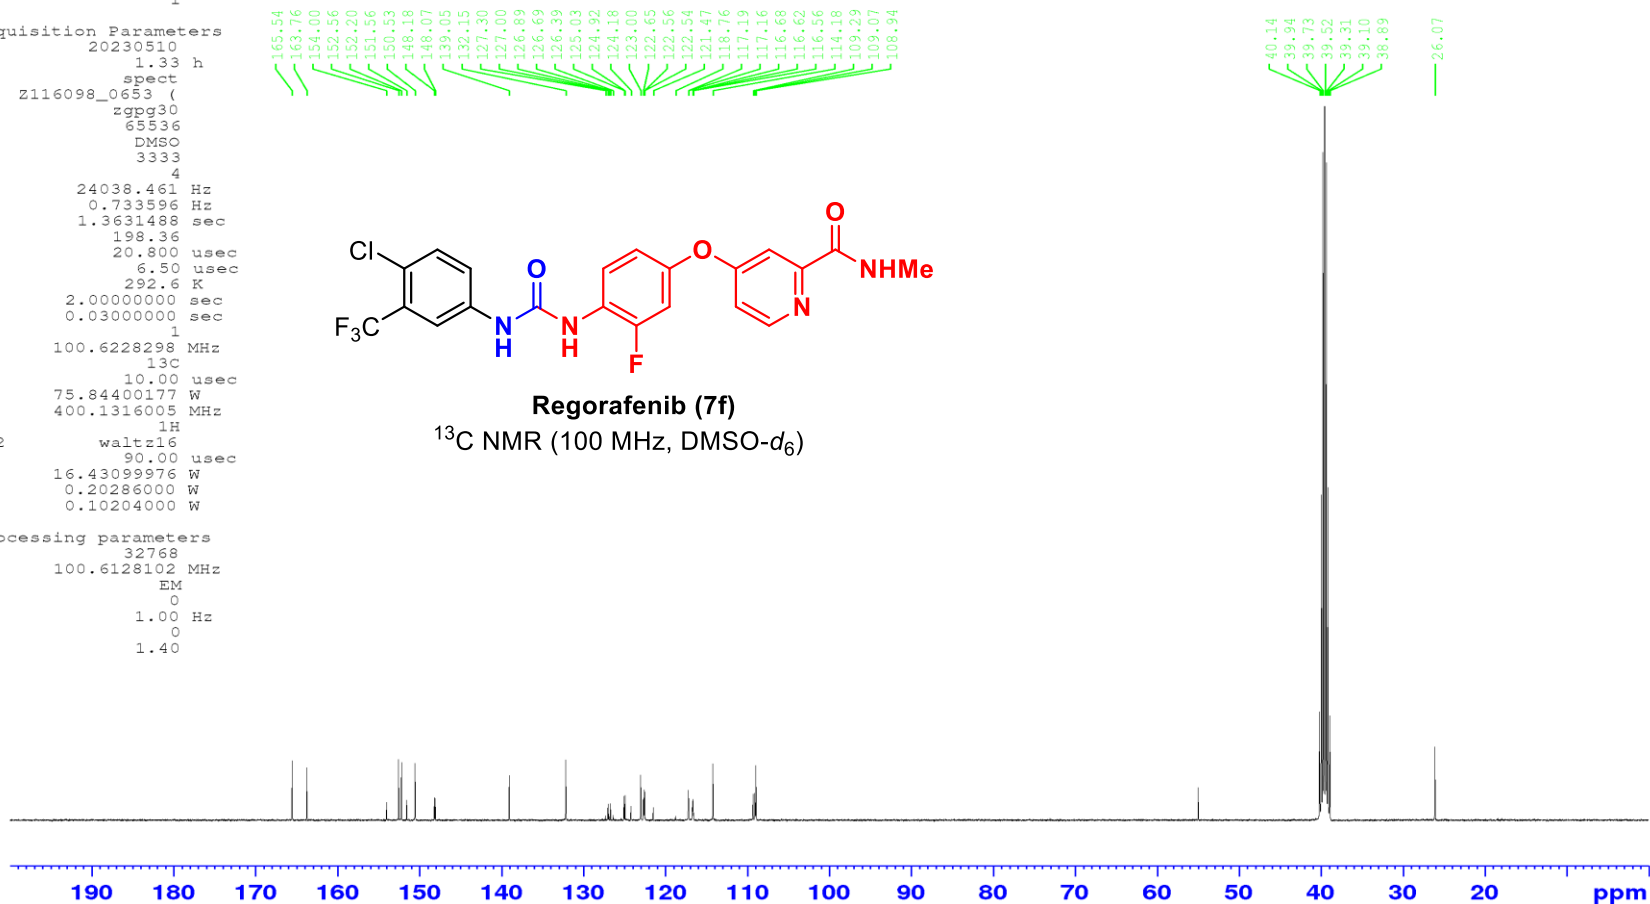

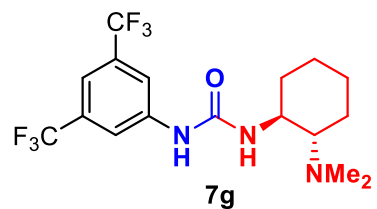

$^1\text{H}$  NMR (400 MHz,  $\text{CDCl}_3$ )

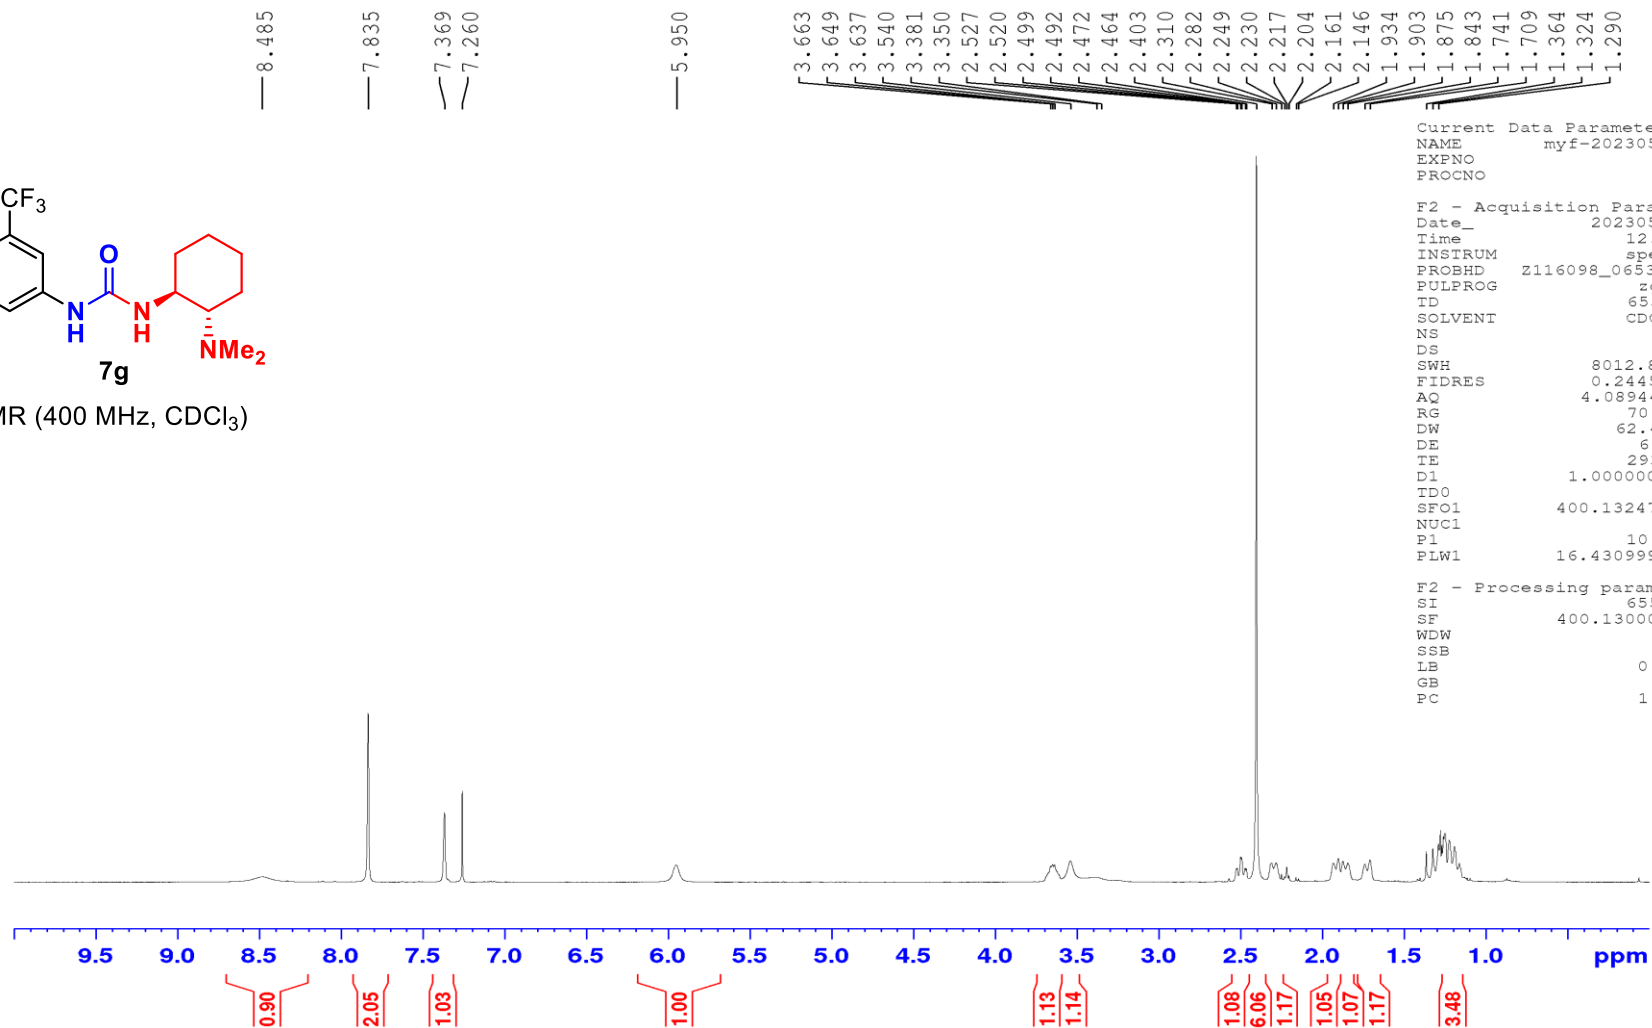

```

Current Data Parameters
NAME      myf-20230526
EXPNO    1
PROCNO   1

F2 - Acquisition Parameters
Date_    20230526
Time     12.12 h
INSTRUM  spect
PROBHD   Z116098_0653 (
PULPROG  zg30
TD        65536
SOLVENT  CDCl3
NS        16
DS        2
SWH       8012.820 Hz
FIDRES    0.244532 Hz
AQ        4.0894465 sec
RG        70.89
DW        62.400 usec
DE        6.50 usec
TE        293.8 K
D1        1.00000000 sec
TDO       1
SF01      400.1324708 MHz
NUC1      1H
P1        10.00 usec
PLW1      16.43099976 W

F2 - Processing parameters
SI        65536
SF        400.1300099 MHz
WDW       EM
SSB       0
LB        0.30 Hz
GB        0
PC        1.00
  
```

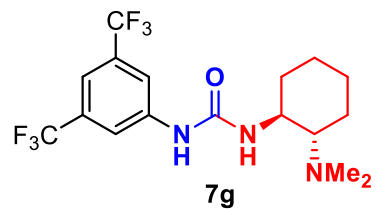

$^{13}\text{C}$  NMR (100 MHz,  $\text{CDCl}_3$ )

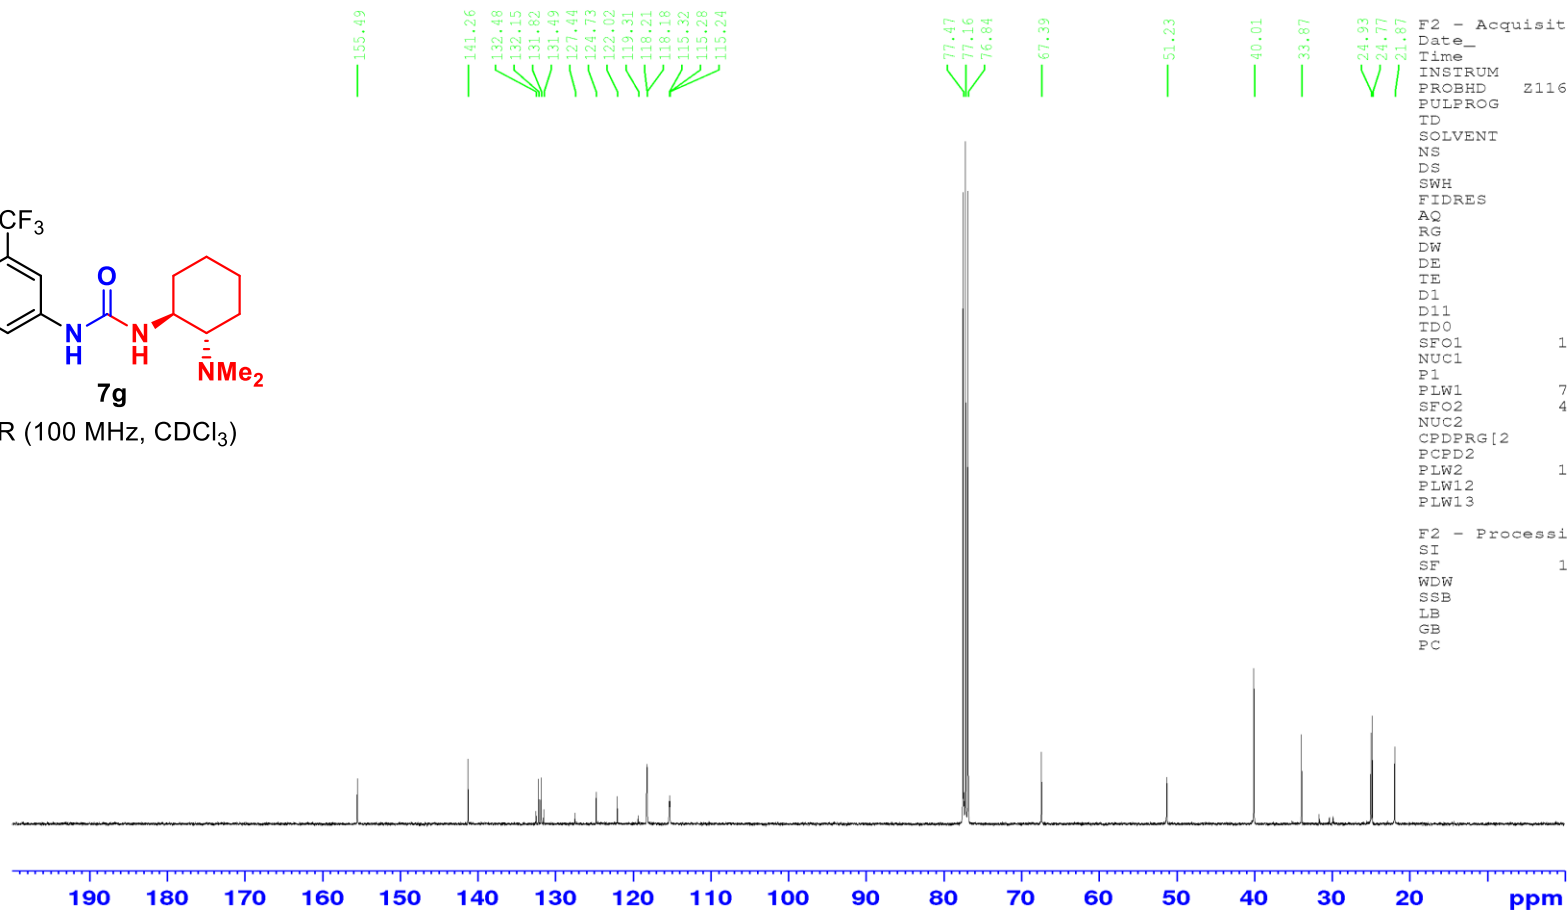

Current Data Parameters  
 NAME myf-20230526  
 EXPNO 2  
 PROCNO 1

F2 - Acquisition Parameters  
 Date\_ 20230526  
 Time 15.24 h  
 INSTRUM spect  
 PROBHD Z116098\_0653 (  
 PULPROG zgpg30  
 TD 65536  
 SOLVENT CDCl3  
 NS 3333  
 DS 4  
 SWH 24038.461 Hz  
 FIDRES 0.733596 Hz  
 AQ 1.3631488 sec  
 RG 198.36  
 DW 20.800 usec  
 DE 6.50 usec  
 TE 294.7 K  
 D1 2.00000000 sec  
 D11 0.03000000 sec  
 TD0 1  
 SFO1 100.6228298 MHz  
 NUC1 13C  
 P1 10.00 usec  
 PLW1 75.84400177 W  
 SFO2 400.1316005 MHz  
 NUC2 1H  
 CPDPRG[2] waltz16  
 PCPD2 90.00 usec  
 PLW2 16.43099976 W  
 PLW12 0.20286000 W  
 PLW13 0.10204000 W

F2 - Processing parameters  
 SI 32768  
 SF 100.6127564 MHz  
 WDW EM  
 SSB 0  
 LB 1.00 Hz  
 GB 0  
 PC 1.40

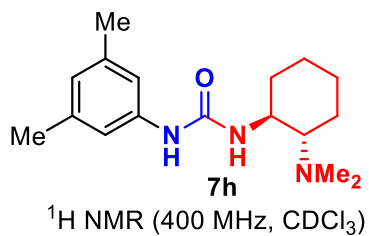

— 7.526  
 — 7.260  
 — 6.976  
 — 6.640

< 6.011  
 < 5.997

3.605  
 3.560  
 3.549  
 3.534  
 3.522  
 3.509  
 3.496  
 3.483  
 2.394  
 2.362  
 2.356  
 2.335  
 2.328  
 2.308  
 2.299  
 2.270  
 2.238  
 1.834  
 1.819  
 1.799  
 1.766  
 1.671  
 1.636  
 1.326  
 1.310  
 1.302  
 1.294  
 1.278  
 1.275  
 1.270  
 1.262

```

Current Data Parameters
NAME           C1c
EXPNO          1
PROCNO         1

F2 - Acquisition Parameters
Date_          20230722
Time           1.47 h
INSTRUM        spect
PROBHD         z116098_0653 (
PULPROG        zg30
TD             65536
SOLVENT        CDCl3
NS             16
DS             2
SWH            8012.820 Hz
FIDRES         0.244532 Hz
AQ            4.0894465 sec
RG            31.9
DW            62.400 usec
DE            6.50 usec
TE            292.6 K
D1            1.00000000 sec
TD0           1
SFO1          400.1324708 MHz
NUC1           1H
P1            10.00 usec
PLW1          16.43099976 W

F2 - Processing parameters
SI            65536
SF            400.1300099 MHz
WDW           EM
SSB           0
LB            0.30 Hz
GB            0
PC            1.00
  
```

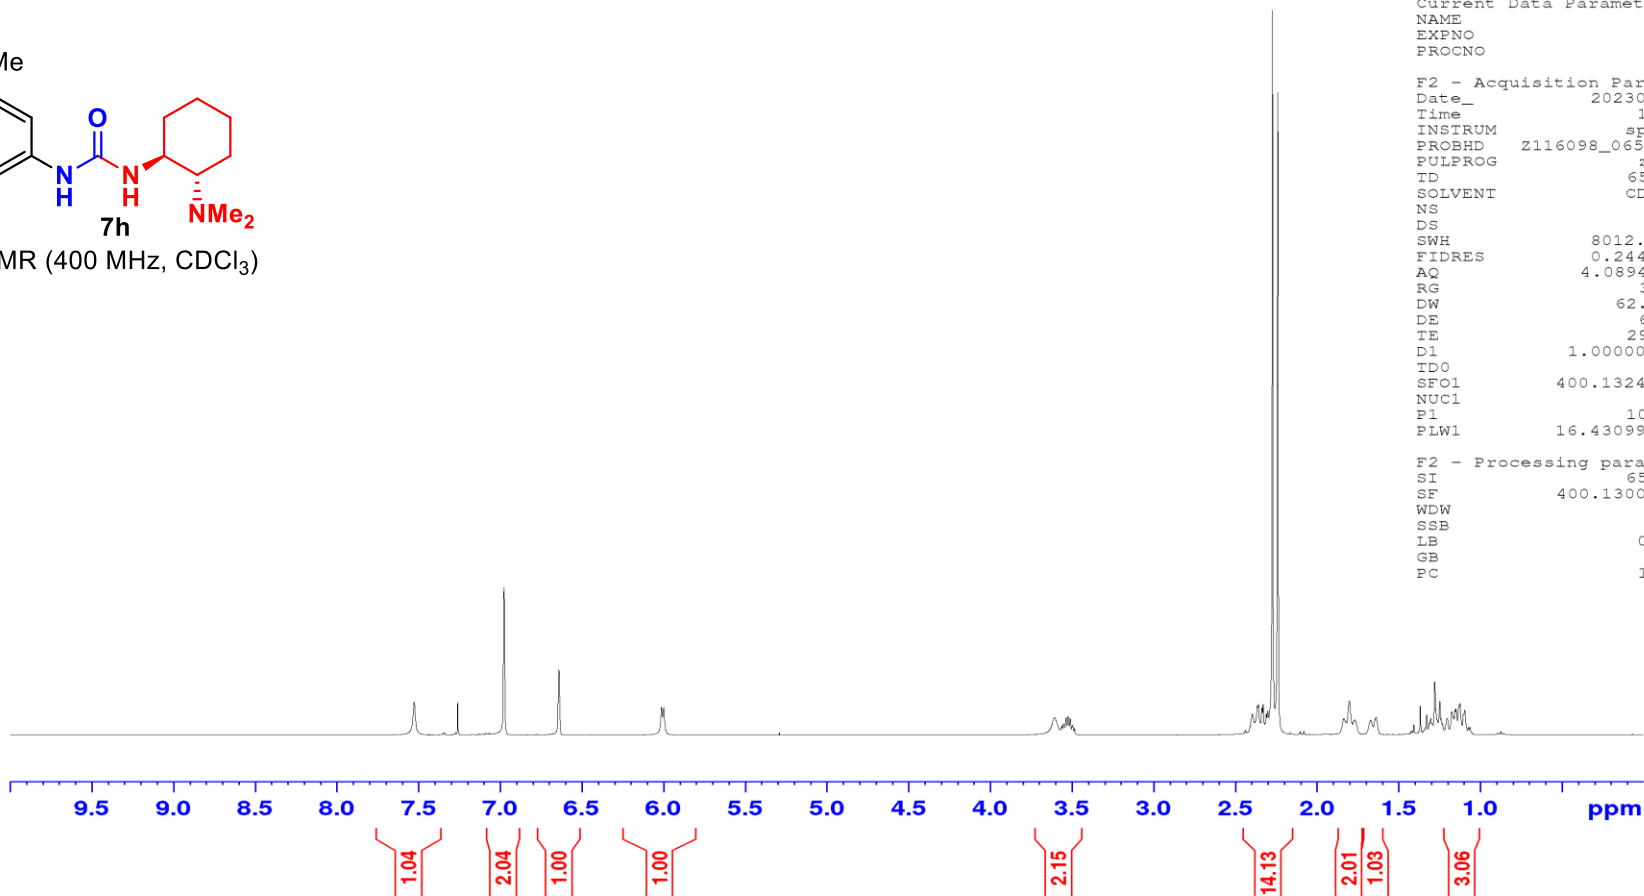

Current Data Parameters  
NAME C1c  
EXPNO 2  
PROCNO 1

F2 - Acquisition Parameters  
Date\_ 20230722  
Time\_ 4.01 h  
INSTRUM spect  
PROBHD Z116098\_0653 (  
PULPROG zgpg30  
TD 65536  
SOLVENT CDCl3  
NS 2333  
DS 4  
SWH 24038.461 Hz  
FIDRES 0.733596 Hz  
AQ 1.3631488 sec  
RG 198.36  
DW 20.800 usec  
DE 6.50 usec  
TE 292.9 K  
D1 2.00000000 sec  
D11 0.03000000 sec  
TDO 1  
SFO1 100.6228298 MHz  
NUC1 13c  
P1 10.00 usec  
PLW1 75.84400177 W  
SFO2 400.1316005 MHz  
NUC2 1H  
CPDPRG[2] waltz16  
PCPD2 90.00 usec  
PLW2 16.43099976 W  
PLW12 0.20286000 W  
PLW13 0.10204000 W

F2 - Processing parameters  
SI 32768  
SF 100.6127601 MHz  
WDW EM  
SSB 0  
LB 1.00 Hz  
GB 0  
PC 1.40

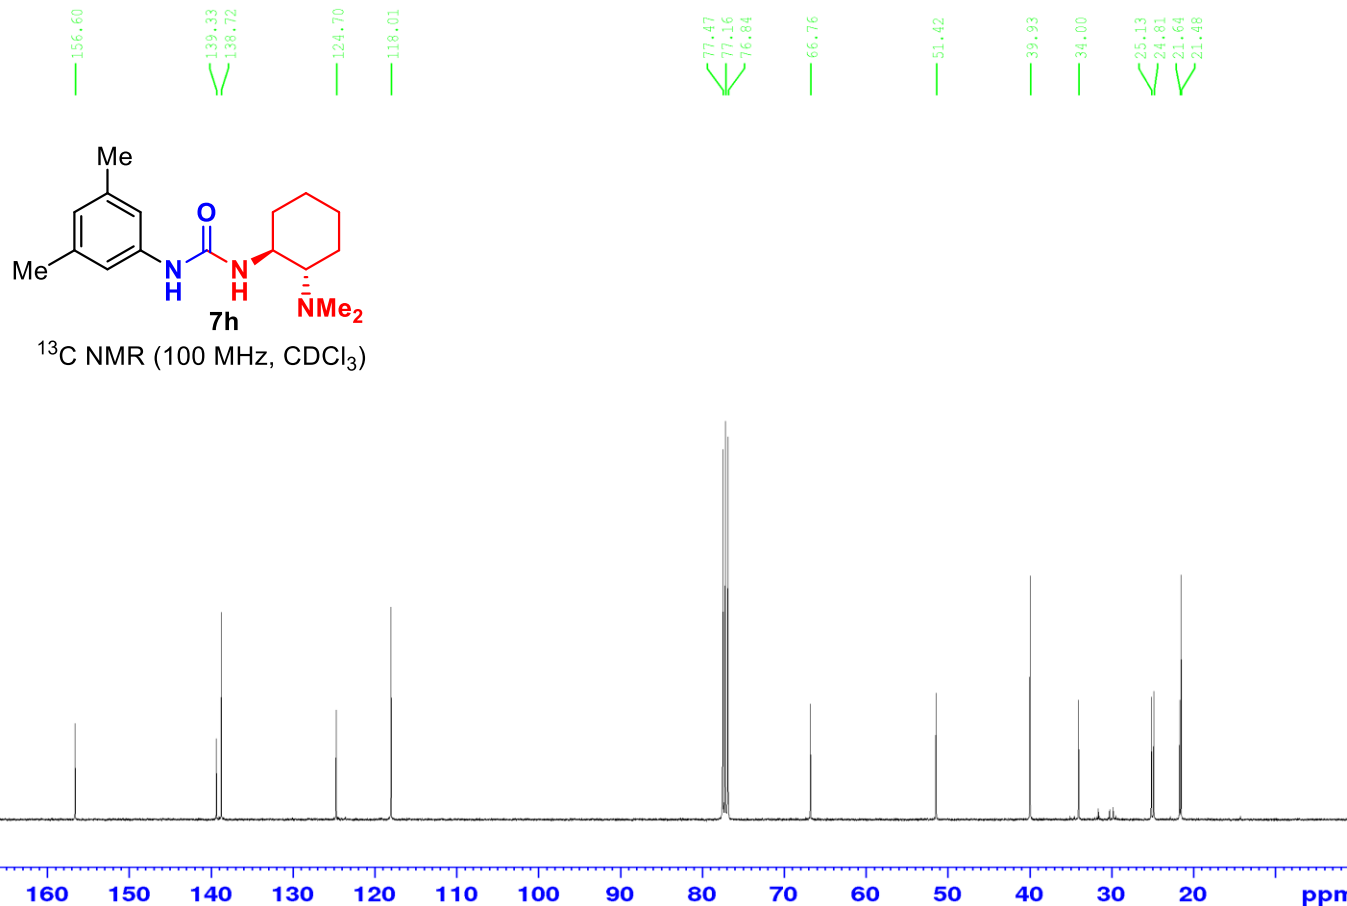

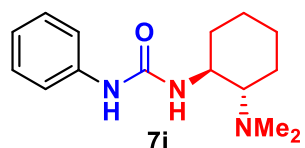

<sup>1</sup>H NMR (400 MHz, CDCl<sub>3</sub>)

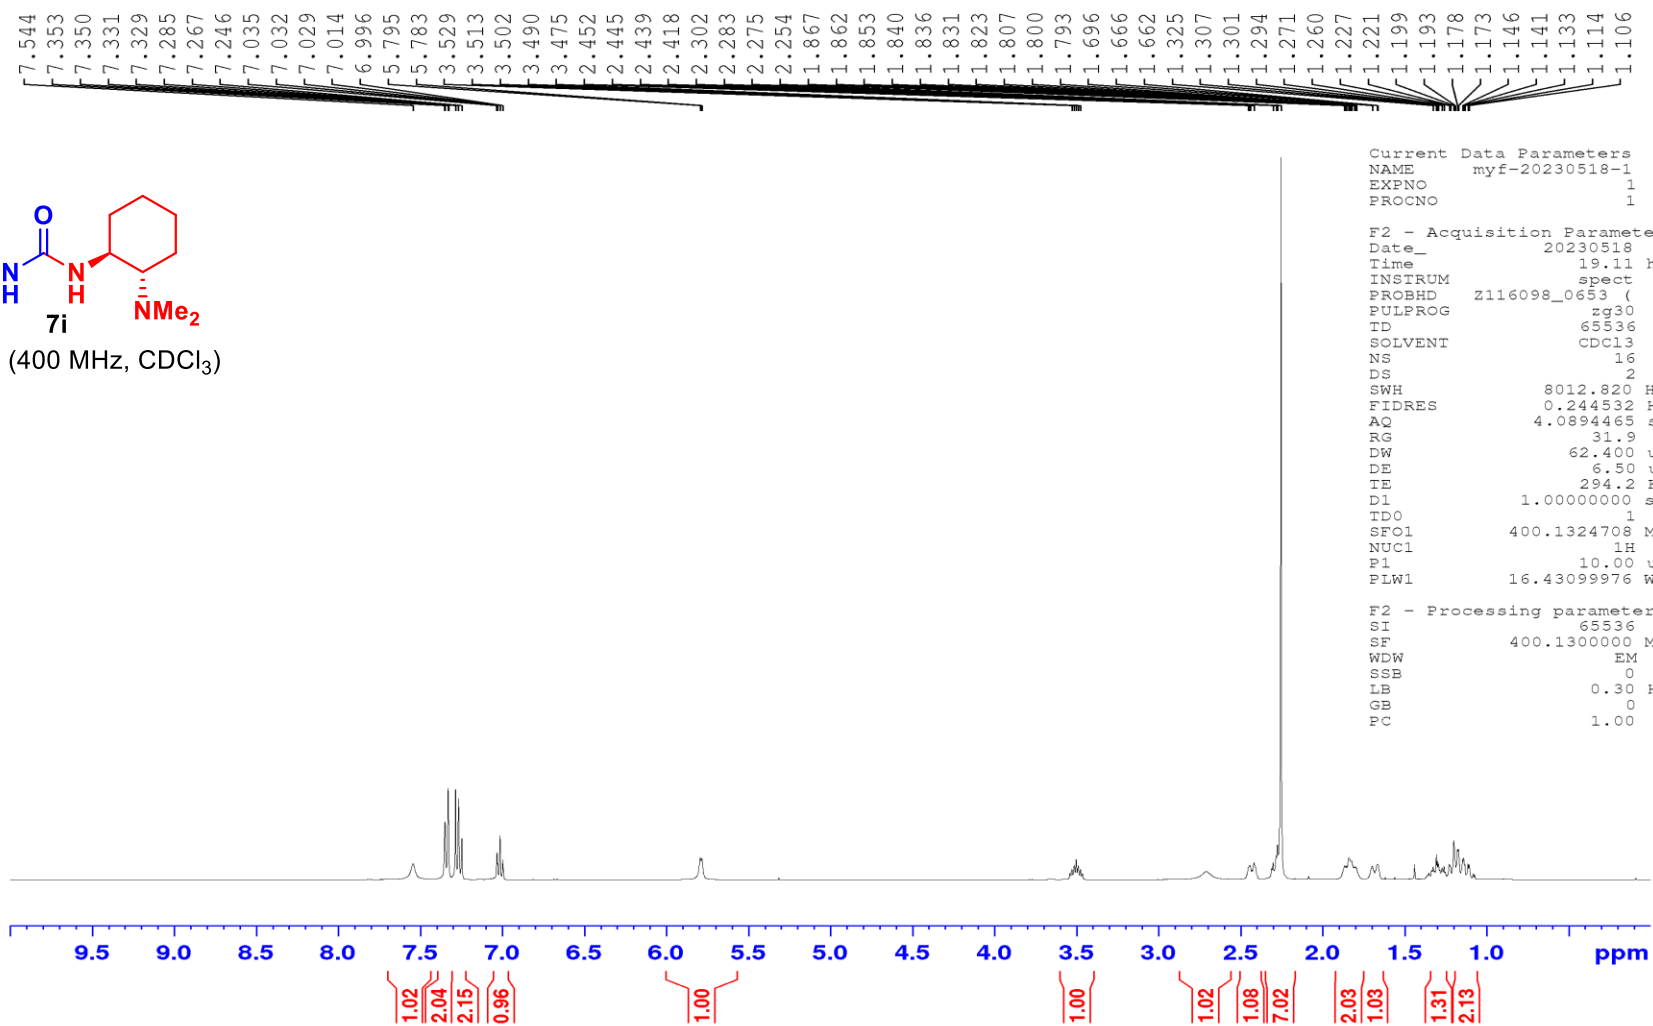

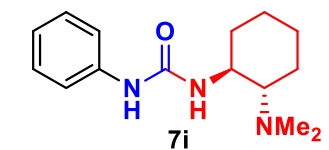

$^{13}\text{C}$  NMR (100 MHz,  $\text{CDCl}_3$ )

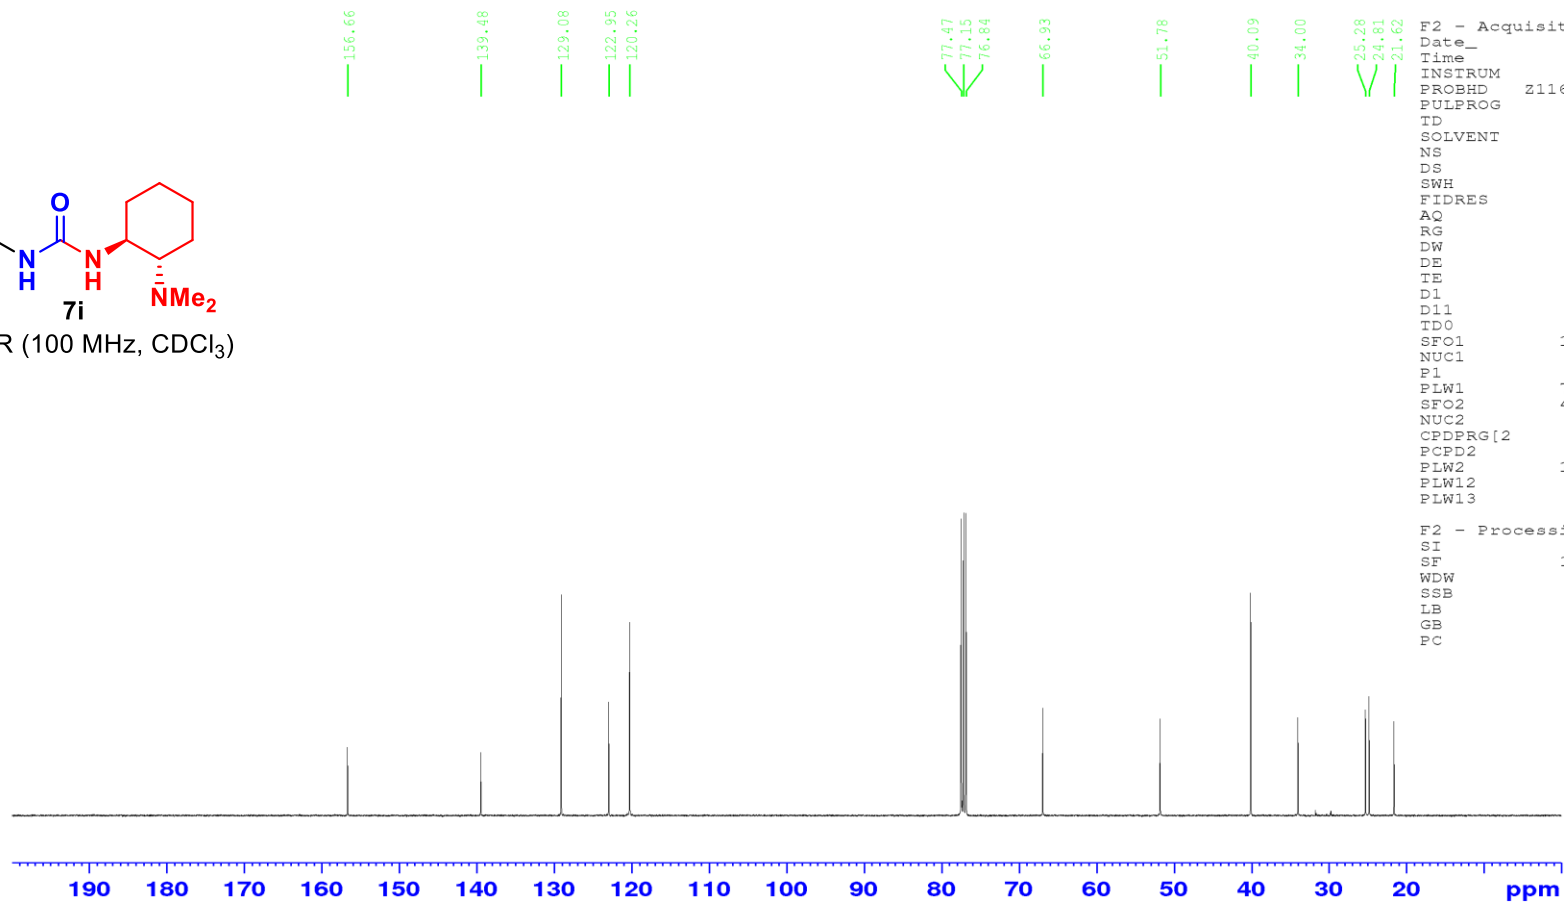

Current Data Parameters  
 NAME myf-20230518-1  
 EXPNO 2  
 PROCNO 1

F2 - Acquisition Parameters  
 Date\_ 20230518  
 Time\_ 21.45 h  
 INSTRUM spect  
 PROBHD z116098\_0653 (  
 PULPROG zgpg30  
 TD 65536  
 SOLVENT CDCl3  
 NS 2666  
 DS 4  
 SWH 24038.461 Hz  
 FIDRES 0.733596 Hz  
 AQ 1.3631488 sec  
 RG 198.36  
 DW 20.800 usec  
 DE 6.50 usec  
 TE 295.1 K  
 D1 2.00000000 sec  
 D11 0.03000000 sec  
 TD0 1  
 SFO1 100.6228298 MHz  
 NUC1 13C  
 P1 10.00 usec  
 PLW1 75.84400177 W  
 SFO2 400.1316005 MHz  
 NUC2 1H  
 CPDPRG[2] waltz16  
 PCPD2 90.00 usec  
 PLW2 16.43099976 W  
 PLW12 0.20286000 W  
 PLW13 0.10204000 W

F2 - Processing parameters  
 SI 32768  
 SF 100.6127594 MHz  
 WDW EM  
 SSB 0  
 LB 1.00 Hz  
 GB 0  
 FC 1.40



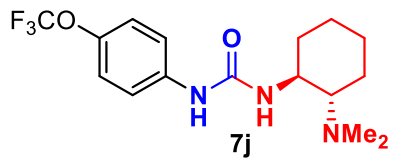

<sup>1</sup>H NMR (400 MHz, CDCl<sub>3</sub>)

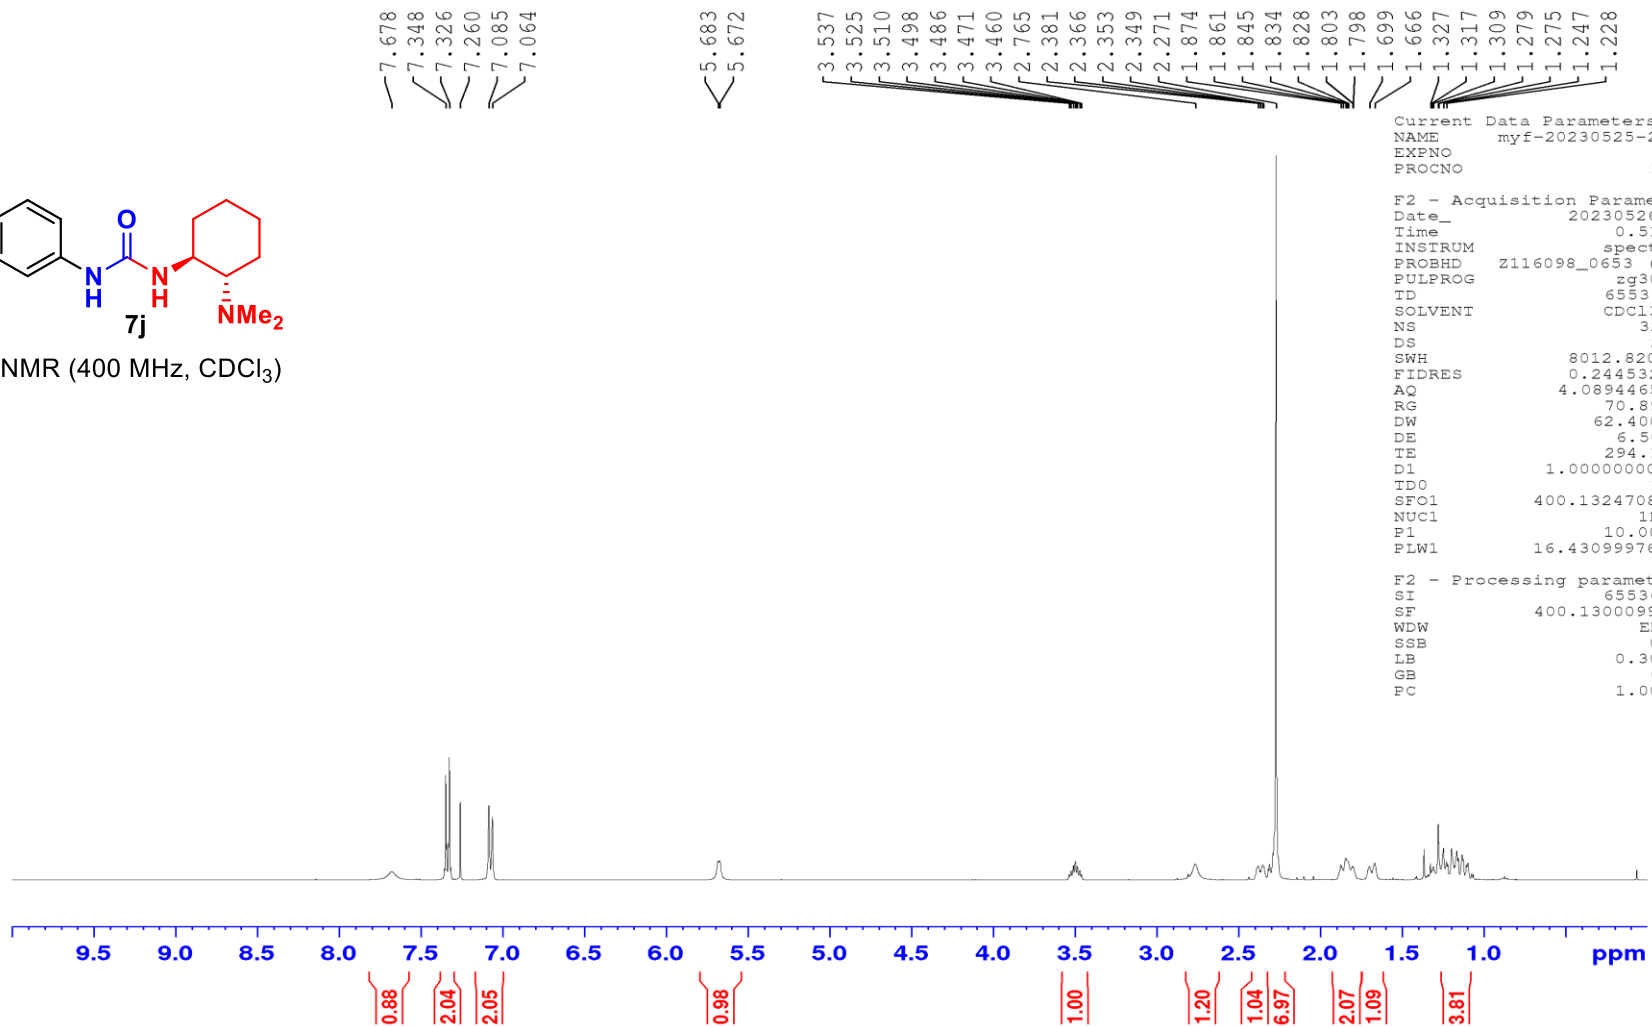

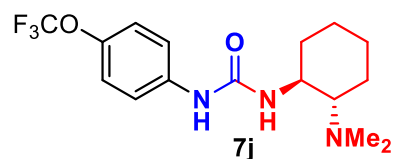

7j  
<sup>13</sup>C NMR (100 MHz, CDCl<sub>3</sub>)

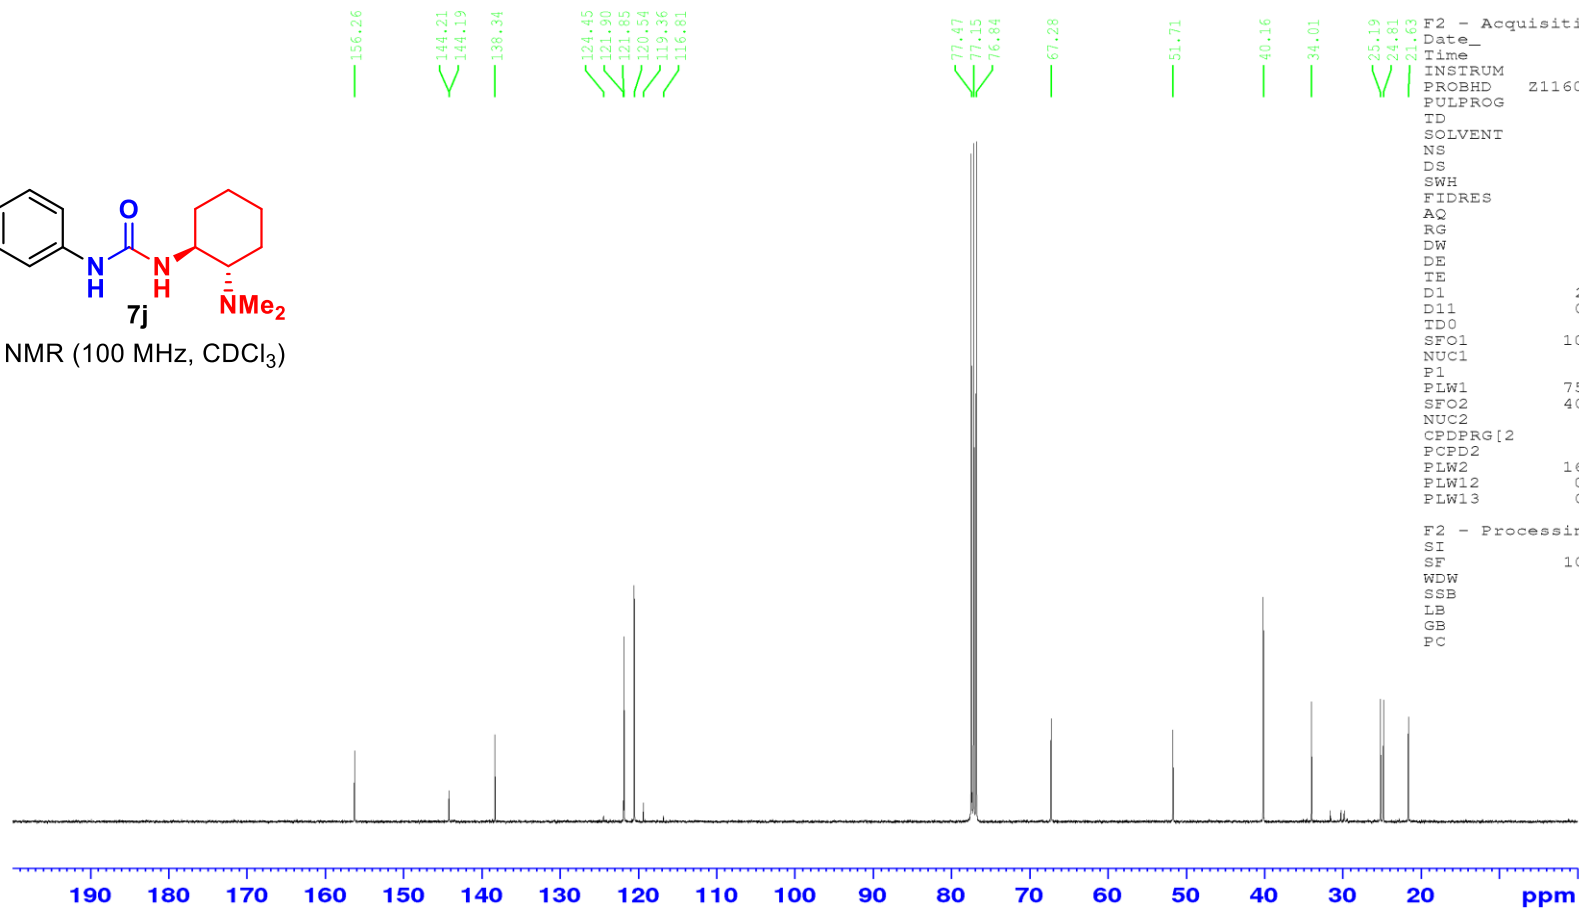

Current Data Parameters  
 NAME myf-20230525-2  
 EXPNO 2  
 PROCNO 1

F2 - Acquisition Parameters  
 Date\_ 20230526  
 Time 4.03 h  
 INSTRUM spect  
 PROBHD Z116098\_0653 ( )  
 PULPROG zgpg30  
 TD 65536  
 SOLVENT CDCl3  
 NS 3333  
 DS 4  
 SWH 24038.461 Hz  
 FIDRES 0.733596 Hz  
 AQ 1.3631488 sec  
 RG 198.36  
 DW 20.800 usec  
 DE 6.50 usec  
 TE 294.6 K  
 D1 2.00000000 sec  
 D11 0.03000000 sec  
 TD0 1  
 SFO1 100.6228298 MHz  
 NUC1 13C  
 P1 10.00 usec  
 PLW1 75.84400177 W  
 SFO2 400.1316005 MHz  
 NUC2 1H  
 CPDPRG[2] waltz16  
 PCPD2 90.00 usec  
 PLW2 16.43099976 W  
 PLW12 0.20286000 W  
 PLW13 0.10204000 W

F2 - Processing parameters  
 SI 32768  
 SF 100.6127571 MHz  
 WDW EM  
 SSB 0  
 LB 1.00 Hz  
 GB 0  
 PC 1.40

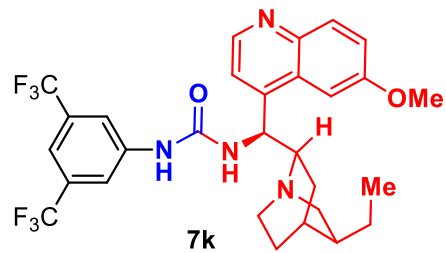

$^1\text{H NMR}$  (400 MHz,  $\text{CDCl}_3$ )

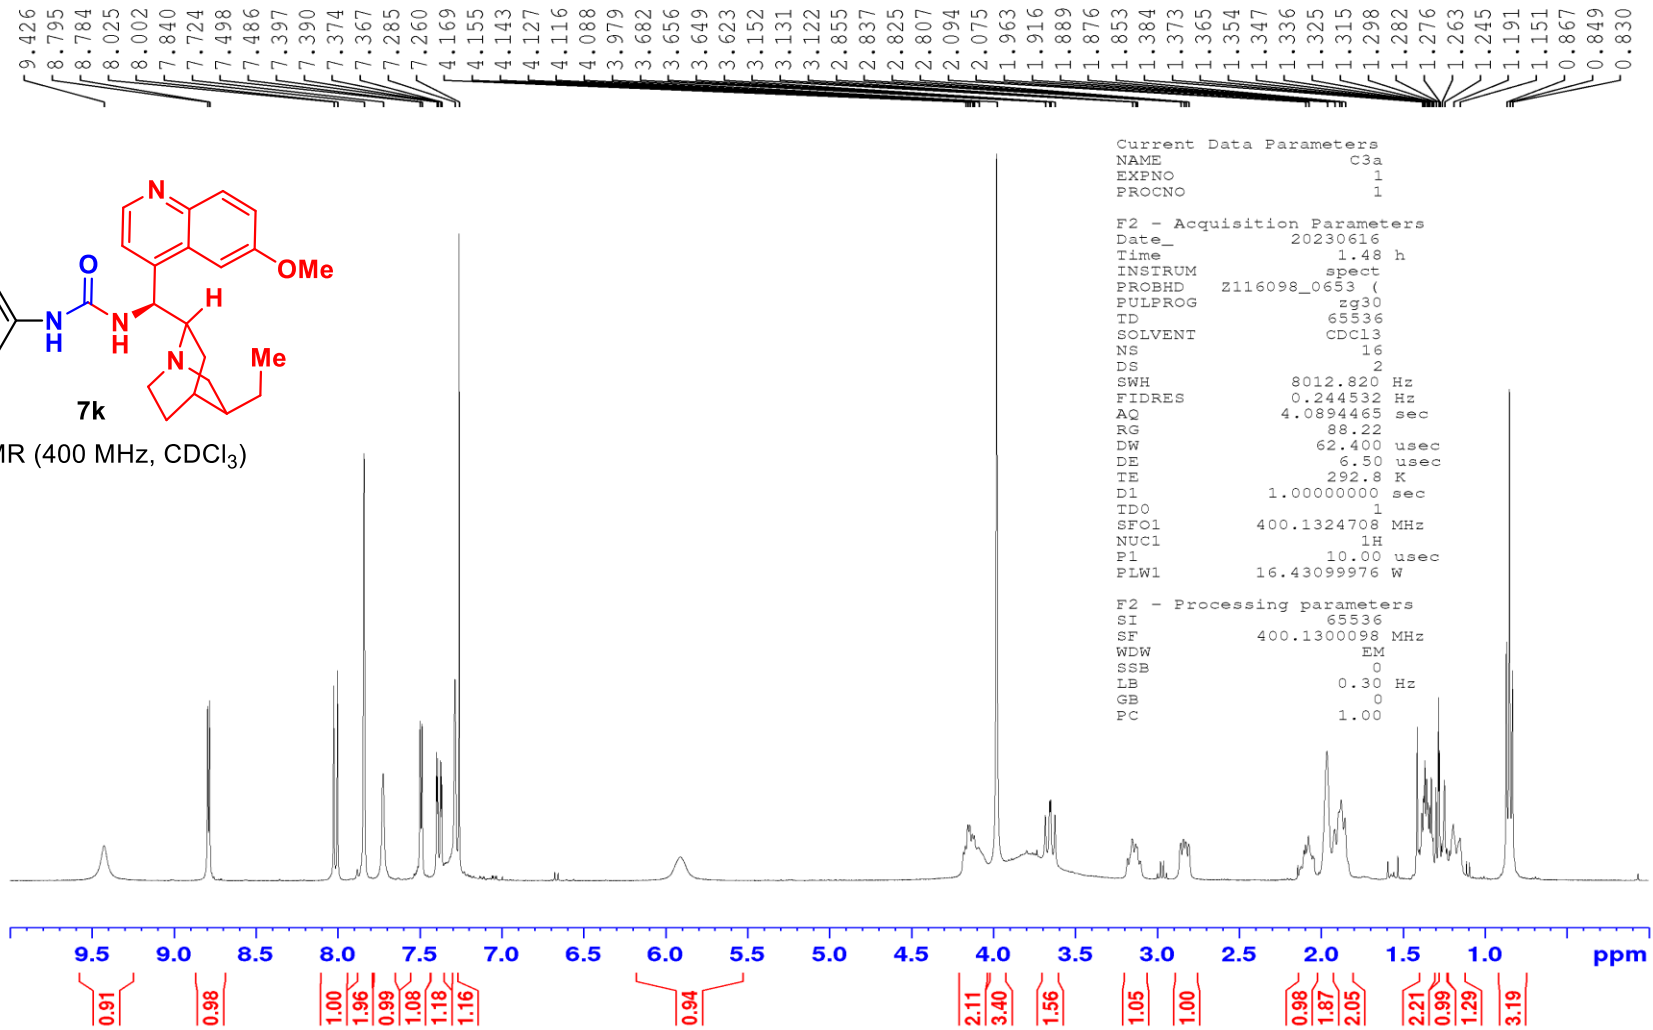

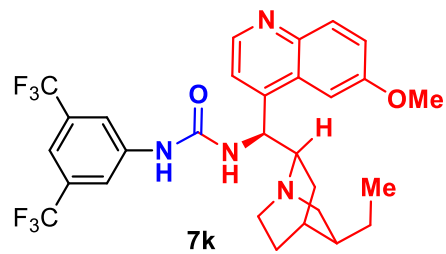

<sup>13</sup>C NMR (100 MHz, CDCl<sub>3</sub>)

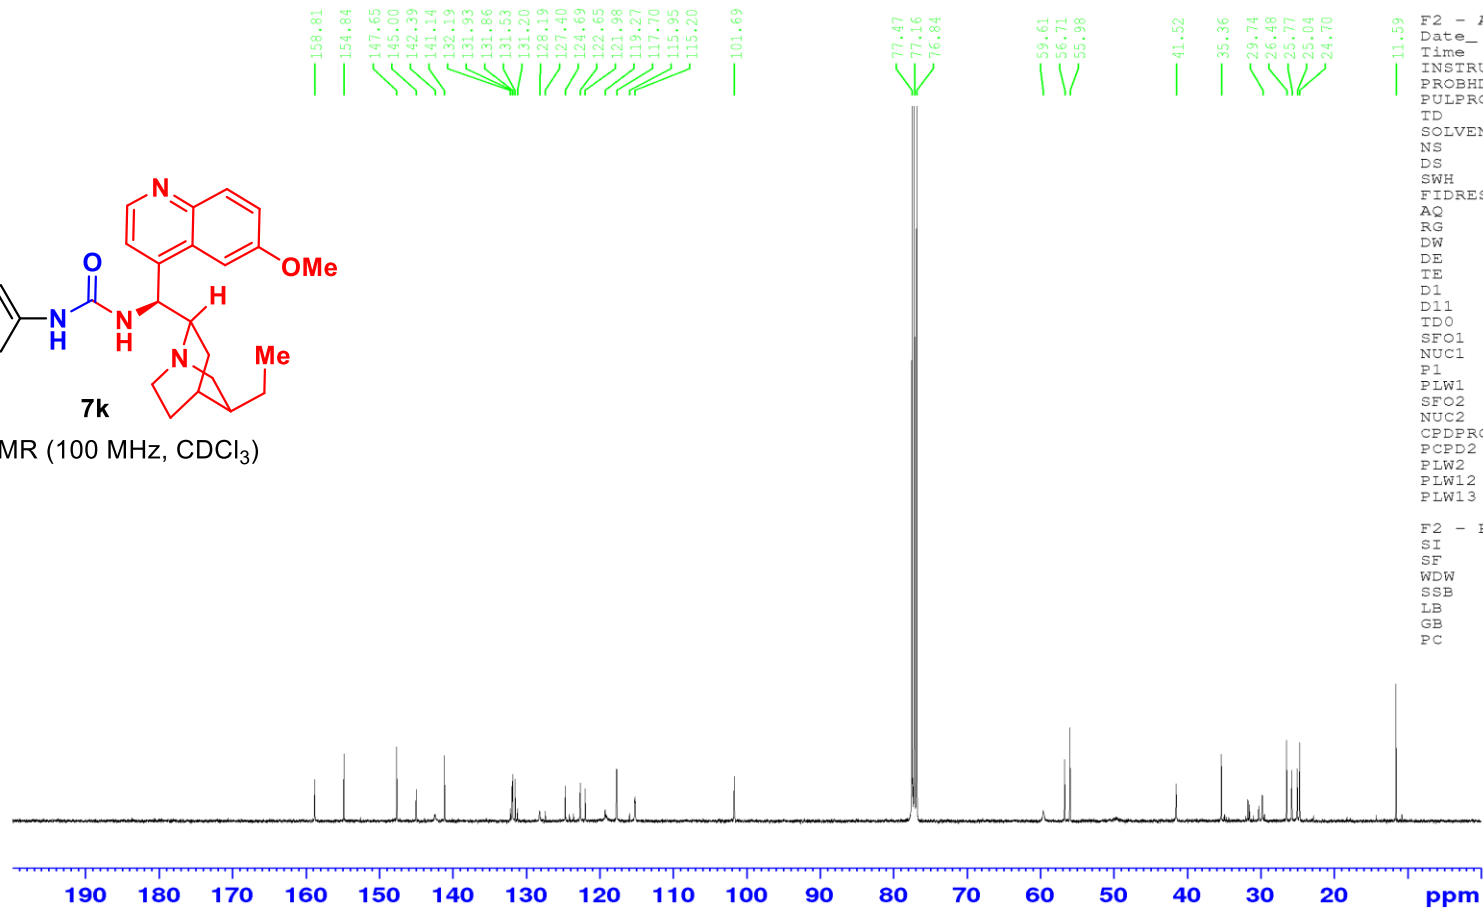

Current Data Parameters  
 NAME C3a  
 EXPNO 2  
 PROCNO 1

F2 - Acquisition Parameters  
 Date\_ 20230617  
 Time 2.52 h  
 INSTRUM spect  
 PROBHD Z116098\_0653 (  
 PULPROG zgpg30  
 TD 65536  
 SOLVENT CDCl3  
 NS 4333  
 DS 4  
 SWH 24038.461 Hz  
 FIDRES 0.733596 Hz  
 AQ 1.3631488 sec  
 RG 198.36  
 DW 20.800 usec  
 DE 6.50 usec  
 TE 293.2 K  
 D1 2.00000000 sec  
 D11 0.03000000 sec  
 TD0 1  
 SFO1 100.6228298 MHz  
 NUC1 13C  
 P1 10.00 usec  
 PLW1 75.84400177 W  
 SFO2 400.1316005 MHz  
 NUC2 1H  
 CPDPRG[2] waltz16  
 PCPD2 90.00 usec  
 PLW2 16.43099976 W  
 PLW12 0.20286000 W  
 PLW13 0.10204000 W

F2 - Processing parameters  
 SI 32768  
 SF 100.6127579 MHz  
 WDW EM  
 SSB 0  
 LB 1.00 Hz  
 GB 0  
 PC 1.40

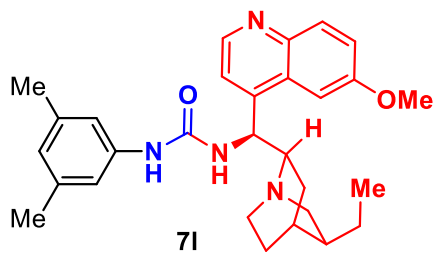

<sup>1</sup>H NMR (400 MHz, CDCl<sub>3</sub>)

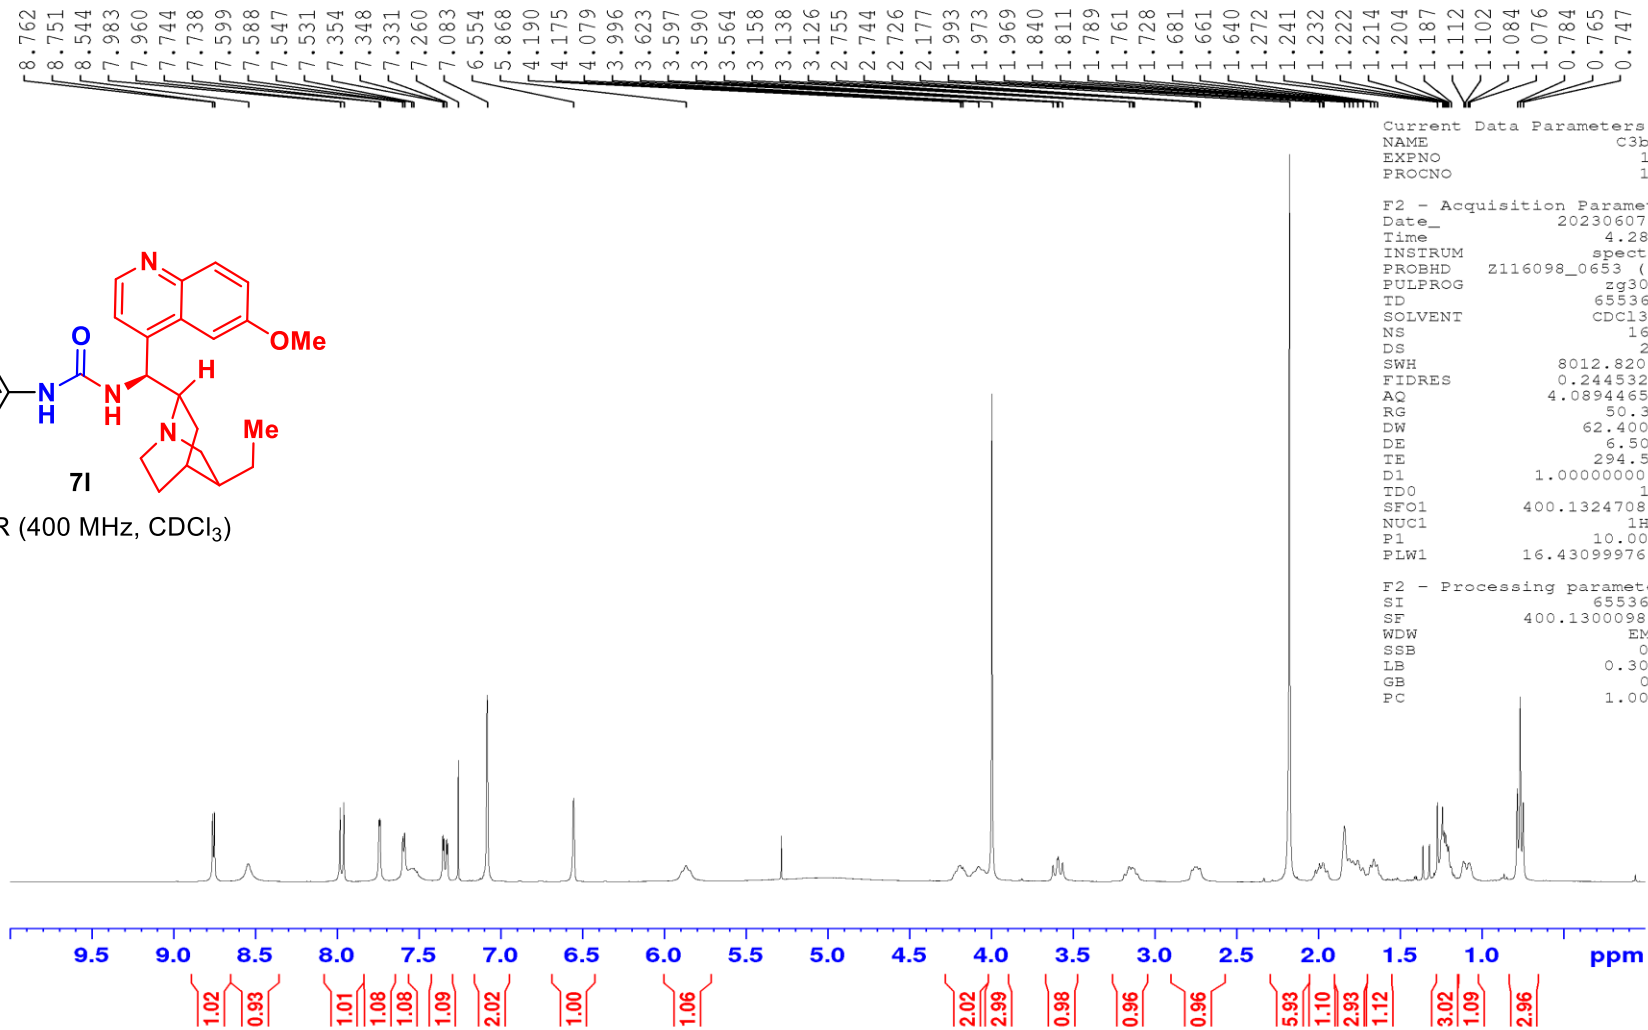

```

Current Data Parameters
NAME                C3b
EXPNO               1
PROCNO              1

F2 - Acquisition Parameters
Date_               20230607
Time                4.28 h
INSTRUM             spect
PROBHD              Z116098_0653 (
PULPROG             zg30
TD                  65536
SOLVENT             CDC13
NS                   16
DS                   2
SWH                  8012.820 Hz
FIDRES              0.244532 Hz
AQ                   4.0894465 sec
RG                   50.3
DW                   62.400 usec
DE                   6.50 usec
TE                   294.5 K
D1                   1.00000000 sec
TD0                  1
SFO1                 400.1324708 MHz
NUC1                 1H
P1                   10.00 usec
PLW1                 16.43099976 W

F2 - Processing parameters
SI                   65536
SF                   400.1300098 MHz
WDW                  EM
SSB                  0
LB                   0.30 Hz
GB                   0
PC                   1.00
  
```

Current Data Parameters  
NAME C3b  
EXPNO 2  
PROCNO 1

F2 - Acquisition Parameters  
Date\_ 20230606  
Time 6.26 h  
INSTRUM spect  
PROBHD Z116098\_0653 (  
PULPROG zgpg30  
TD 65536  
SOLVENT CDCl3  
NS 3333  
DS 4  
SWH 24038.461 Hz  
FIDRES 0.733596 Hz  
AQ 1.3631488 sec  
RG 198.36  
DW 20.800 usec  
DE 6.50 usec  
TE 295.0 K  
D1 2.00000000 sec  
D11 0.03000000 sec  
TDO 1  
SFO1 100.6228298 MHz  
NUC1 13C  
P1 10.00 usec  
PLW1 75.84400177 W  
SFO2 400.1316005 MHz  
NUC2 1H  
CPDPRG2 waltz16  
PCPD2 90.00 usec  
PLW2 16.43099976 W  
PLW12 0.20286000 W  
PLW13 0.10204000 W

F2 - Processing parameters  
SI 32768  
SF 100.6127628 MHz  
WDW EM  
SSB 0  
LB 1.00 Hz  
GB 0  
PC 1.40

158.68 155.42 147.83 144.78 142.22 139.41 138.43 131.70 128.14 124.27 122.45 119.70 116.55 101.71 77.47 77.16 76.84 59.75 56.09 56.02 50.51 41.70 34.79 29.75 25.90 25.02 24.44 21.47 11.51

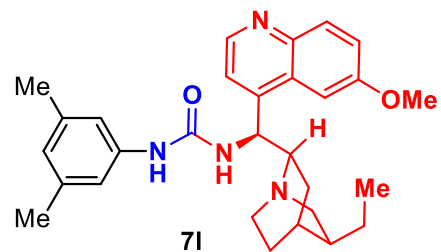

<sup>13</sup>C NMR (100 MHz, CDCl<sub>3</sub>)

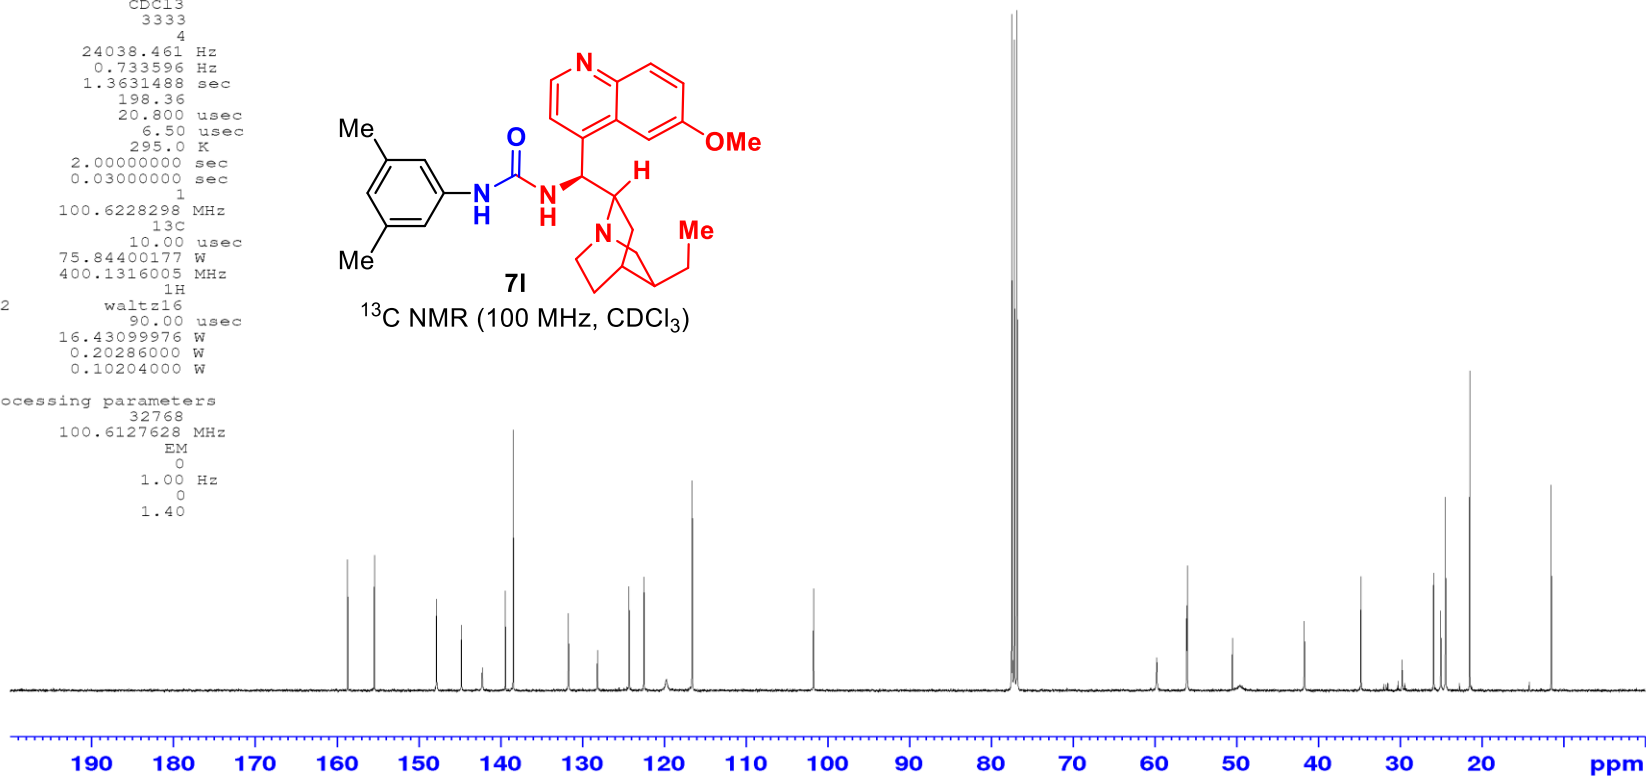

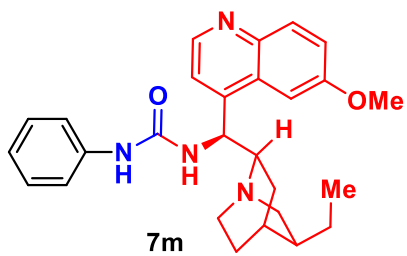

$^1\text{H NMR}$  (400 MHz,  $\text{CDCl}_3$ )

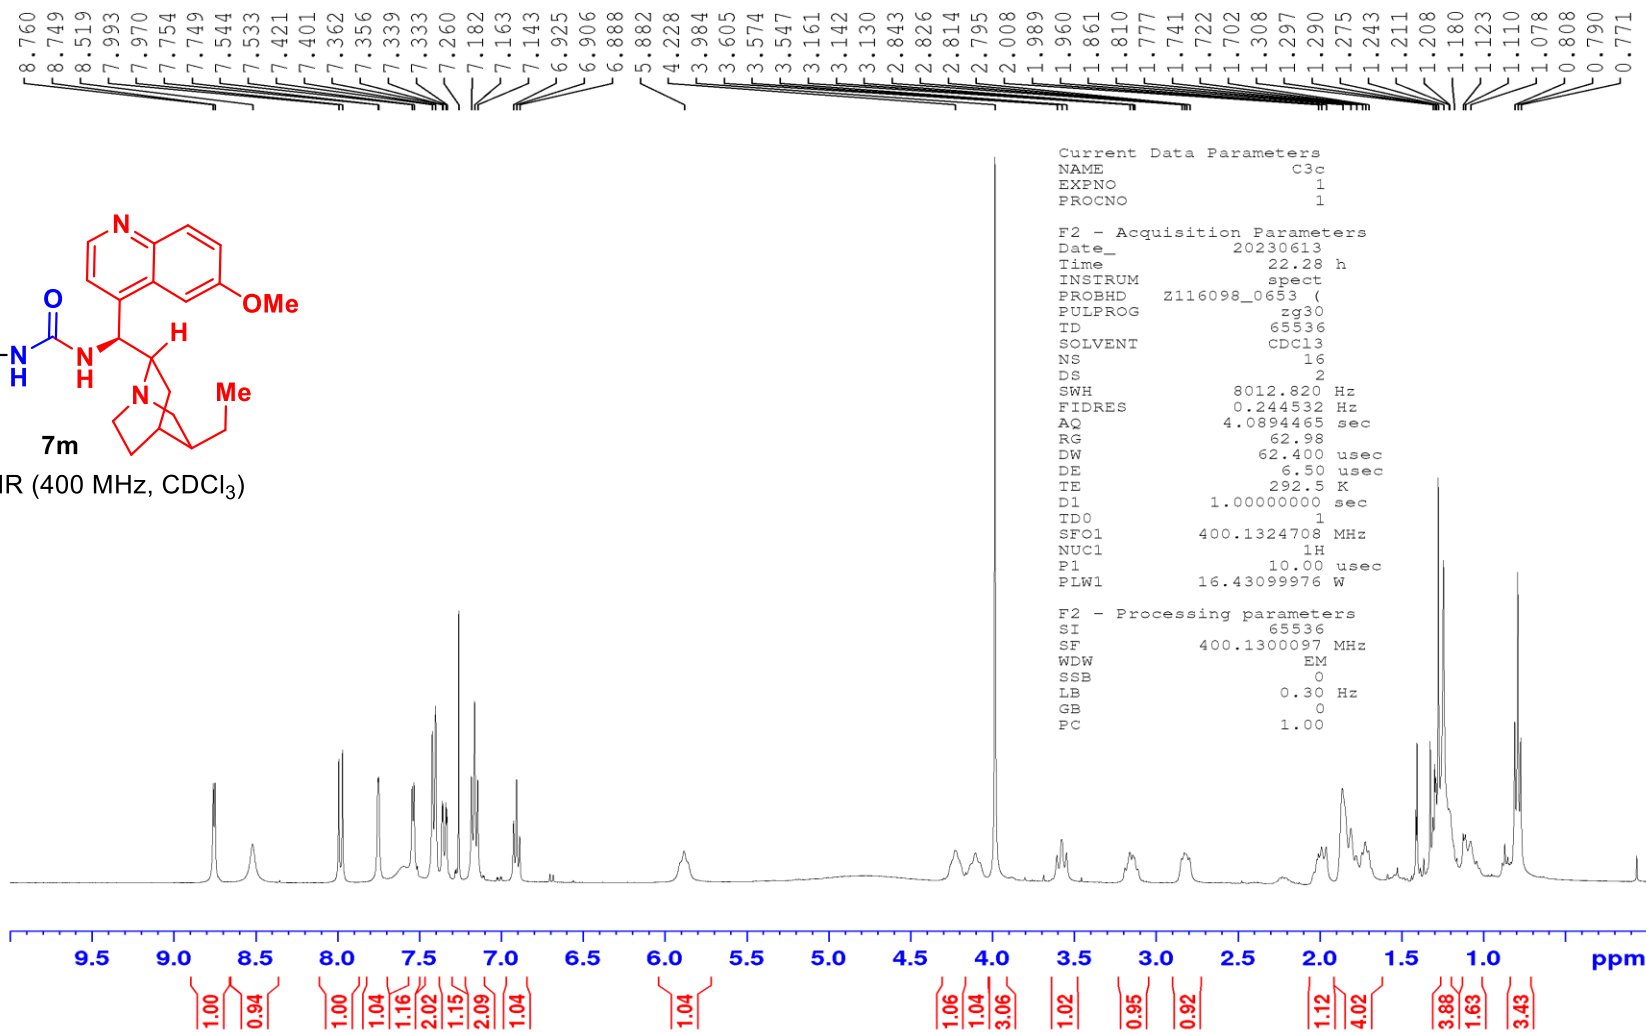

Current Data Parameters  
NAME C3c  
EXPNO 2  
PROCNO 1

F2 - Acquisition Parameters  
Date\_ 20230614  
Time 2.37 h  
INSTRUM spect  
PROBHD Z116098\_0653 (  
PULPROG zgpg30  
TD 65536  
SOLVENT CDCl3  
NS 4333  
DS 4  
SWH 24038.461 Hz  
FIDRES 0.733596 Hz  
AQ 1.3631488 sec  
RG 198.36  
DW 20.800 usec  
DE 6.50 usec  
TE 293.4 K  
D1 2.00000000 sec  
D11 0.03000000 sec  
TD0 1  
SFO1 100.6228298 MHz  
NUC1 13C  
P1 10.00 usec  
PLW1 75.84400177 W  
SFO2 400.1316005 MHz  
NUC2 1H  
CPDPRG[2] waltz16  
PCPD2 90.00 usec  
PLW2 16.43099976 W  
PLW12 0.20286000 W  
PLW13 0.10204000 W

F2 - Processing parameters  
SI 32768  
SF 100.6127586 MHz  
WDW EM  
SSB 0  
LB 1.00 Hz  
GB 0  
PC 1.40

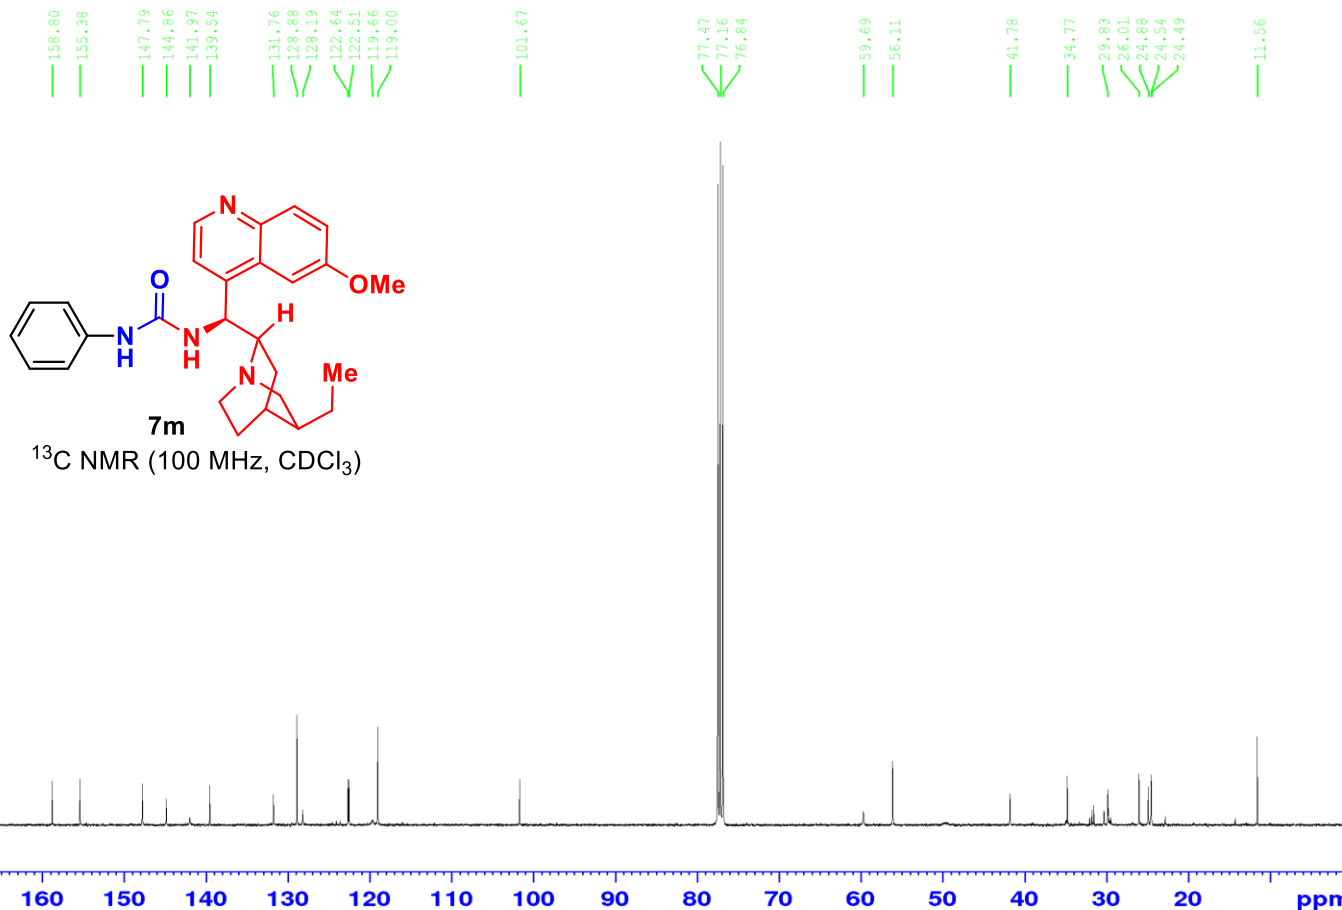



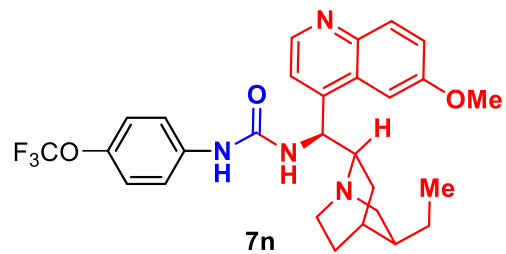

<sup>1</sup>H NMR (400 MHz, CDCl<sub>3</sub>)

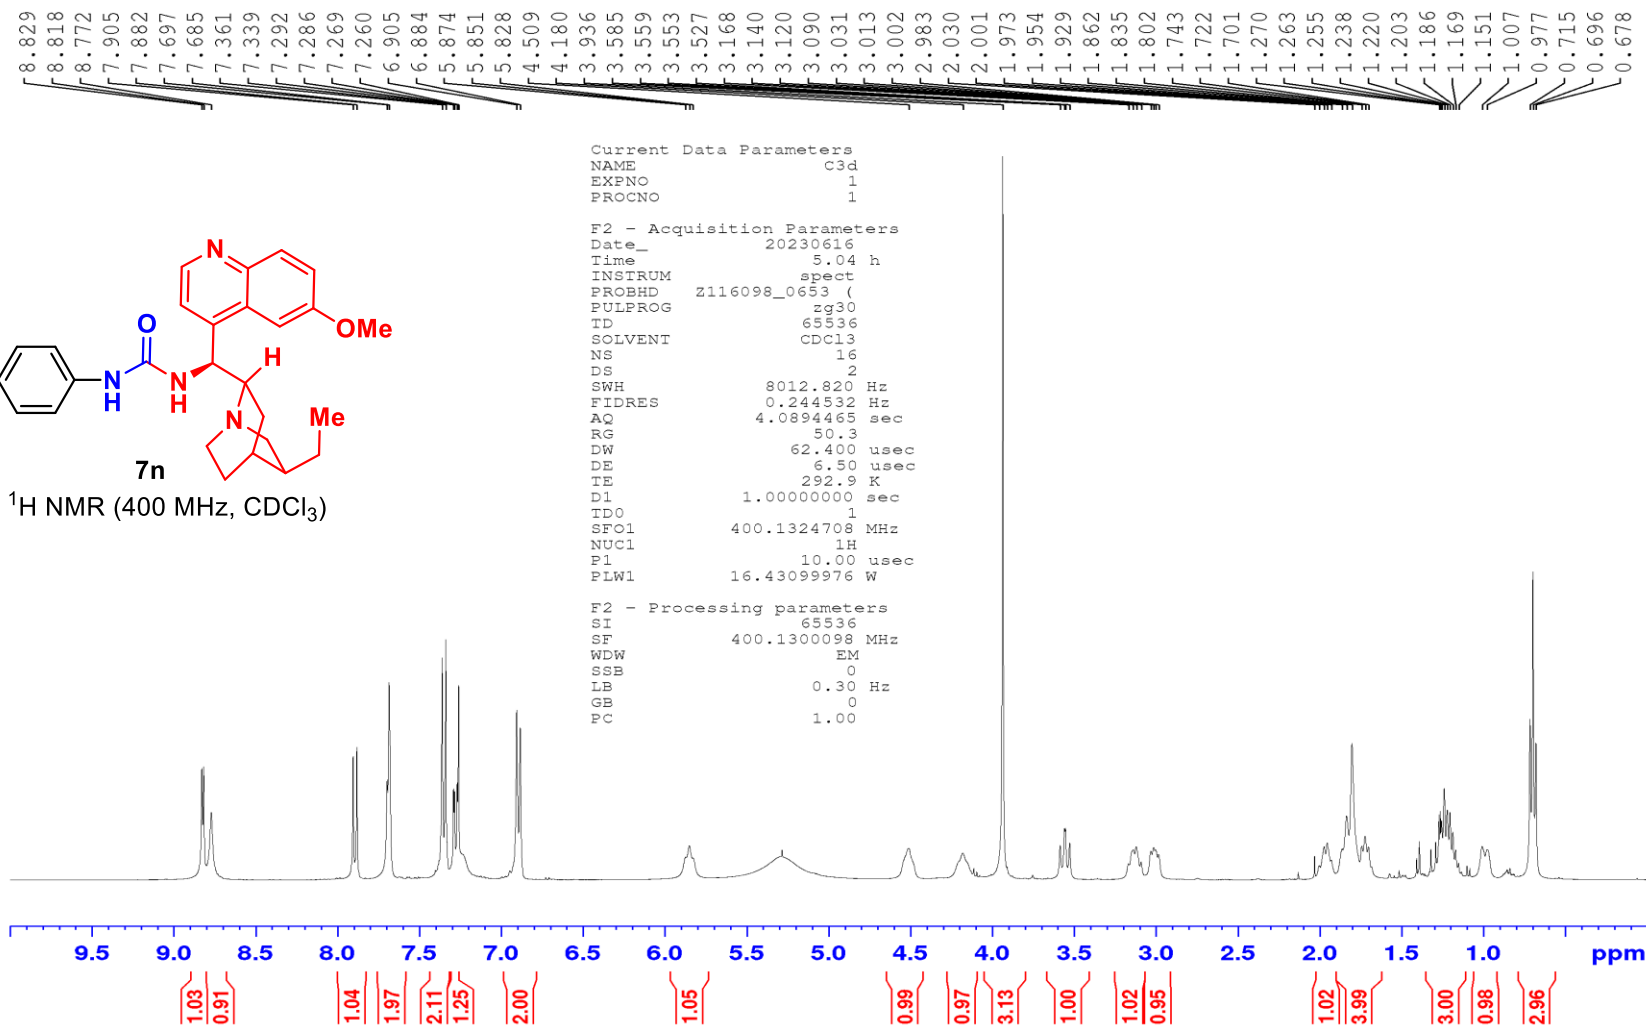

Current Data Parameters  
NAME C3d  
EXPNO 2  
PROCNO 1

F2 - Acquisition Parameters  
Date\_ 20230616  
Time\_ 8.16 h  
INSTRUM spect  
PROBHD Z116098\_0653 (  
PULPROG zgpg30  
TD 65536  
SOLVENT CDCl3  
NS 3333  
DS 4  
SWH 24038.461 Hz  
FIDRES 0.733596 Hz  
AQ 1.3631488 sec  
RG 198.36  
DW 20.800 usec  
DE 6.50 usec  
TE 293.5 K  
D1 2.00000000 sec  
D11 0.03000000 sec  
TDO 1  
SFO1 100.6228298 MHz  
NUC1 13C  
P1 10.00 usec  
PLW1 75.84400177 W  
SFO2 400.1316005 MHz  
NUC2 1H  
CPDPRG[2] waltz16  
PCPD2 90.00 usec  
PLW2 16.43099976 W  
PLW12 0.20286000 W  
PLW13 0.10204000 W

F2 - Processing parameters  
SI 32768  
SF 100.6127594 MHz  
WDW EM  
SSB 0  
LB 1.00 Hz  
GB 0  
PC 1.40

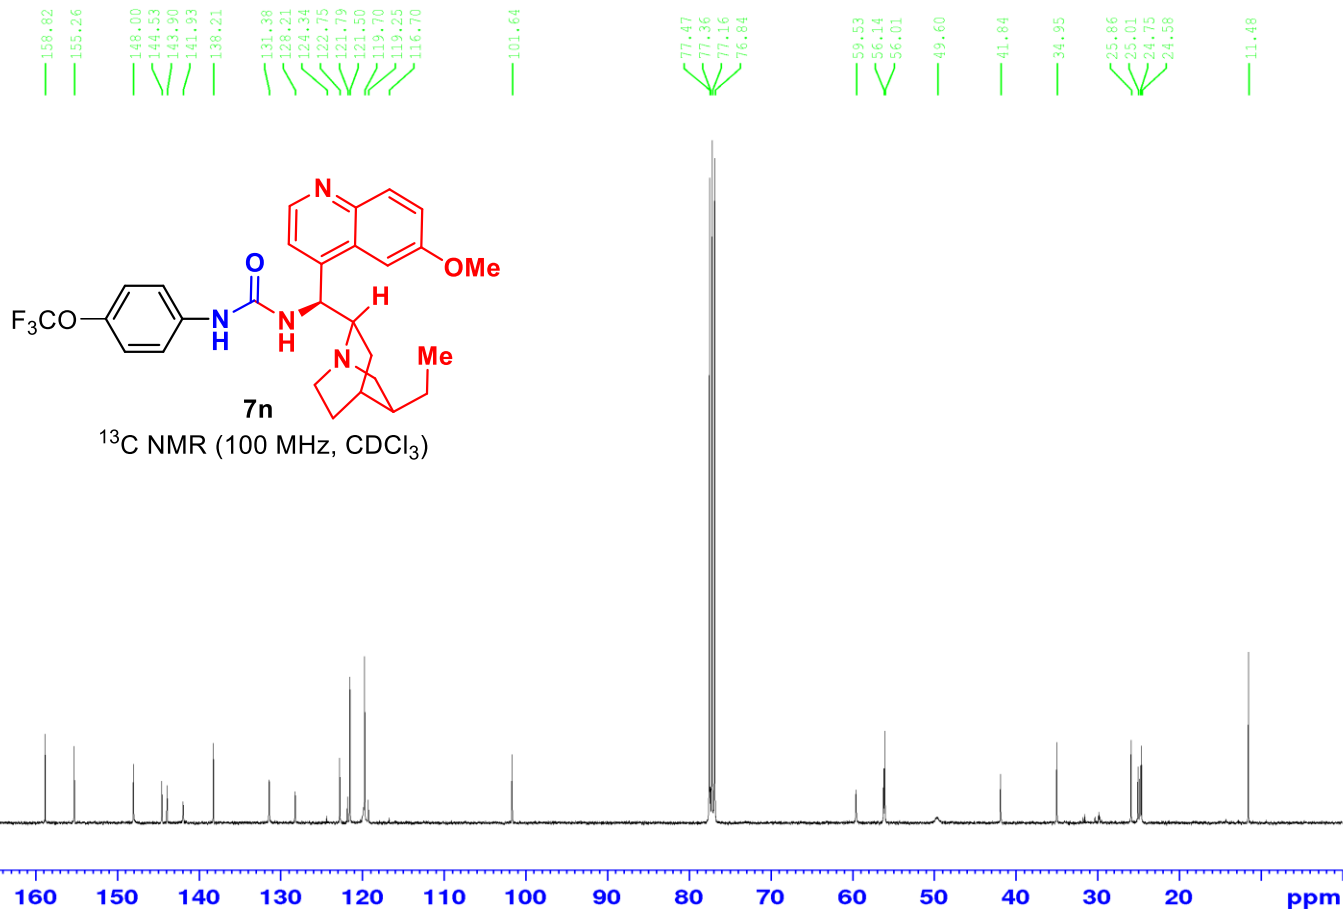

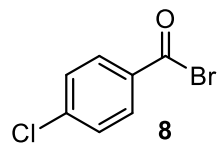

<sup>1</sup>H NMR (400 MHz, CDCl<sub>3</sub>)

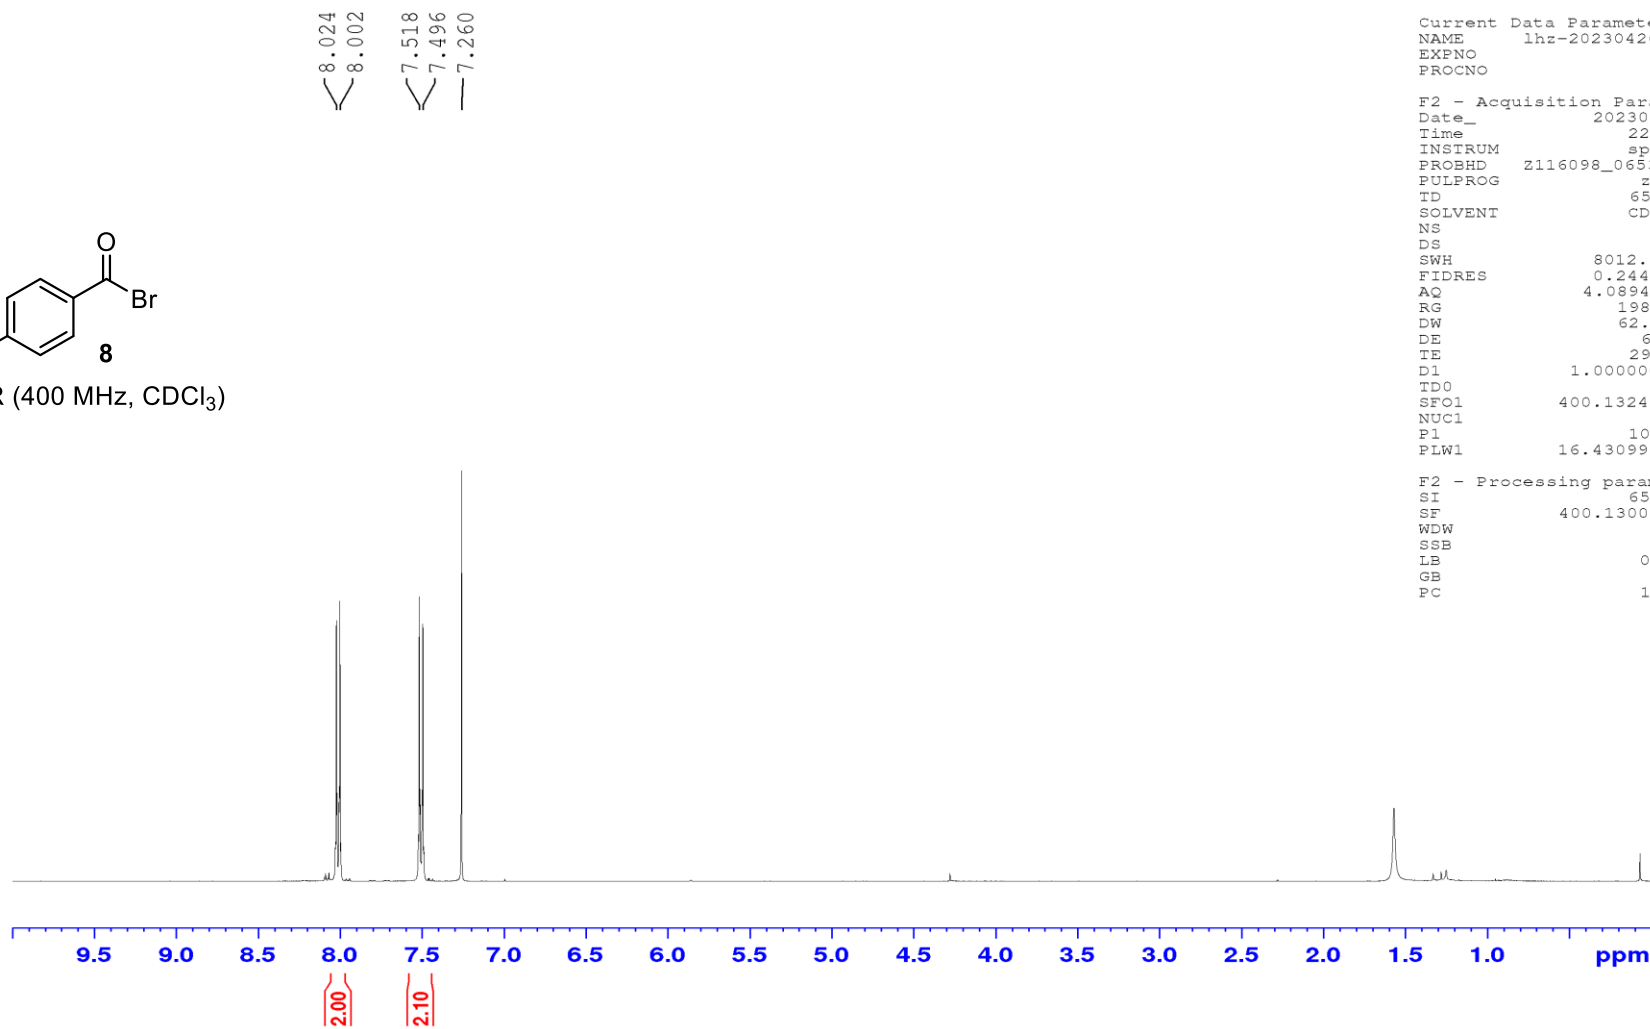

Current Data Parameters  
NAME lhz-20230426-4  
EXPNO 1  
PROCNO 1

F2 - Acquisition Parameters  
Date\_ 20230426  
Time 22.30 h  
INSTRUM spect  
PROBHD z116098\_0653 (  
PULPROG zg30  
TD 65536  
SOLVENT CDCl3  
NS 16  
DS 2  
SWH 8012.820 Hz  
FIDRES 0.244532 Hz  
AQ 4.0894465 sec  
RG 198.36  
DW 62.400 usec  
DE 6.50 usec  
TE 292.0 K  
D1 1.00000000 sec  
TD0 1  
SFO1 400.1324708 MHz  
NUC1 1H  
P1 10.00 usec  
PLW1 16.43099976 W

F2 - Processing parameters  
SI 65536  
SF 400.1300099 MHz  
WDW EM  
SSB 0  
LB 0.30 Hz  
GB 0  
PC 1.00

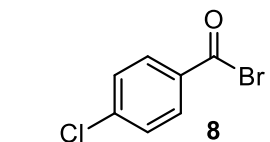

<sup>13</sup>C NMR (100 MHz, CDCl<sub>3</sub>)

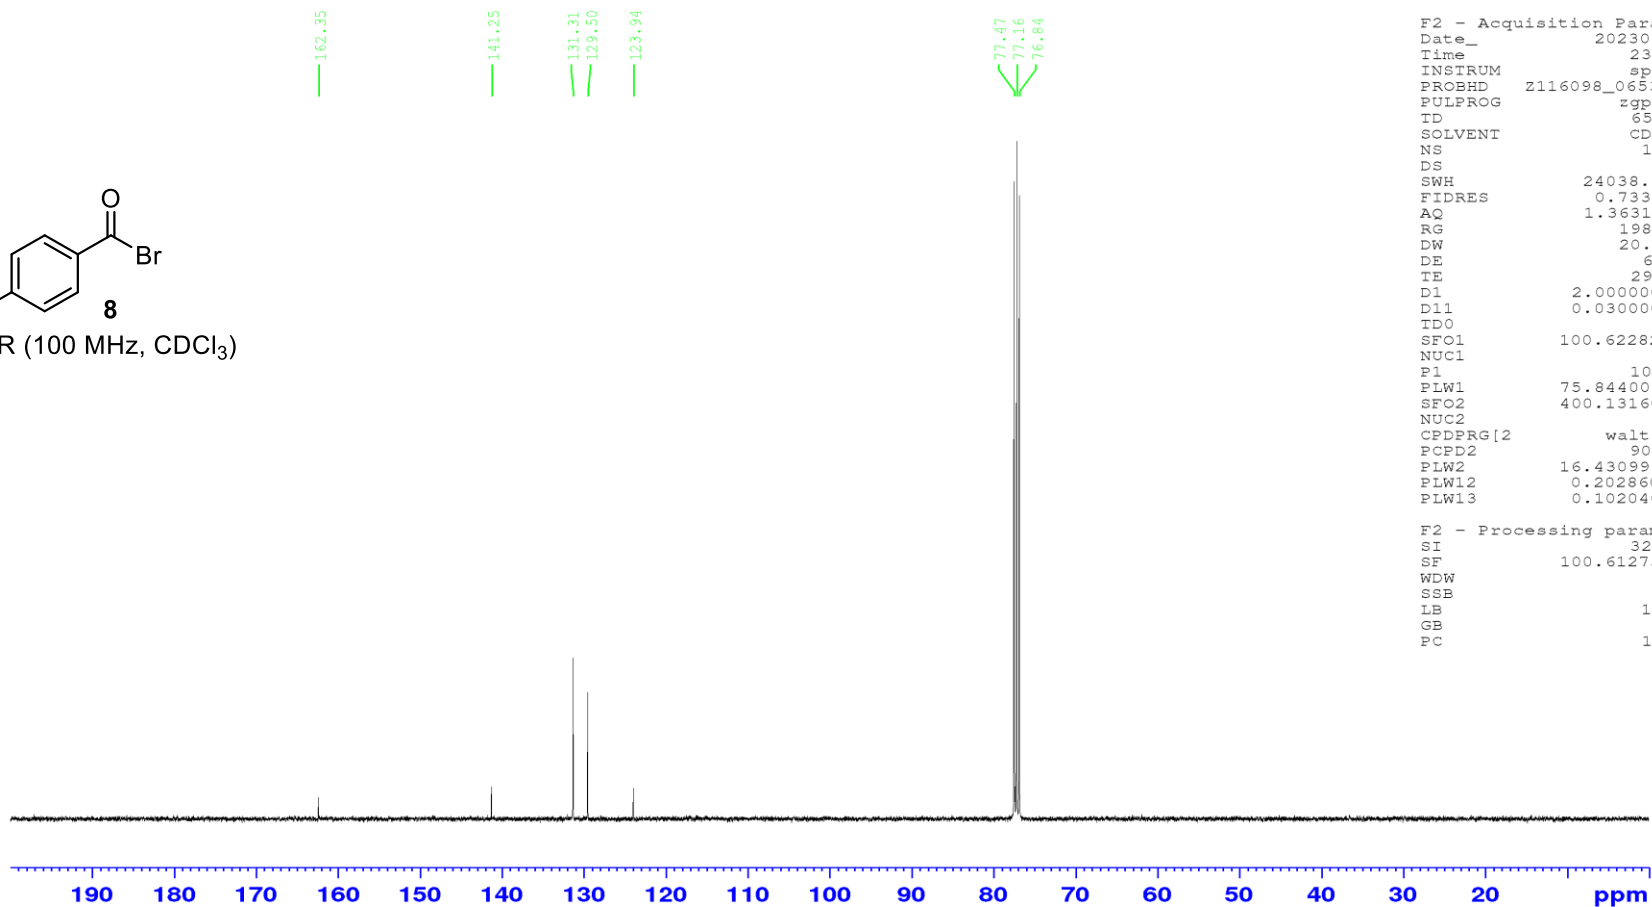

Current Data Parameters  
 NAME lhz-20230426-4  
 EXPNO 2  
 PROCNO 1

F2 - Acquisition Parameters  
 Date\_ 20230426  
 Time 23.30 h  
 INSTRUM spect  
 PROBHD Z116098\_0653 (  
 PULPROG zgpg30  
 TD 65536  
 SOLVENT CDCl3  
 NS 1024  
 DS 4  
 SWH 24038.461 Hz  
 FIDRES 0.733596 Hz  
 AQ 1.3631488 sec  
 RG 198.36  
 DW 20.800 usec  
 DE 6.50 usec  
 TE 292.7 K  
 D1 2.00000000 sec  
 D11 0.03000000 sec  
 TD0 1  
 SFO1 100.6228298 MHz  
 NUC1 13c  
 P1 10.00 usec  
 PLW1 75.84400177 W  
 SFO2 400.1316005 MHz  
 NUC2 1H  
 CPDPRG[2] waltz16  
 FCPD2 90.00 usec  
 PLW2 16.43099976 W  
 PLW12 0.20286000 W  
 PLW13 0.10204000 W

F2 - Processing parameters  
 SI 32768  
 SF 100.6127564 MHz  
 WDW EM  
 SSB 0  
 LB 1.00 Hz  
 GB 0  
 FC 1.40

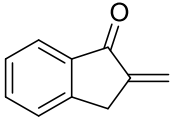

**10**

<sup>1</sup>H NMR (400 MHz, CDCl<sub>3</sub>)

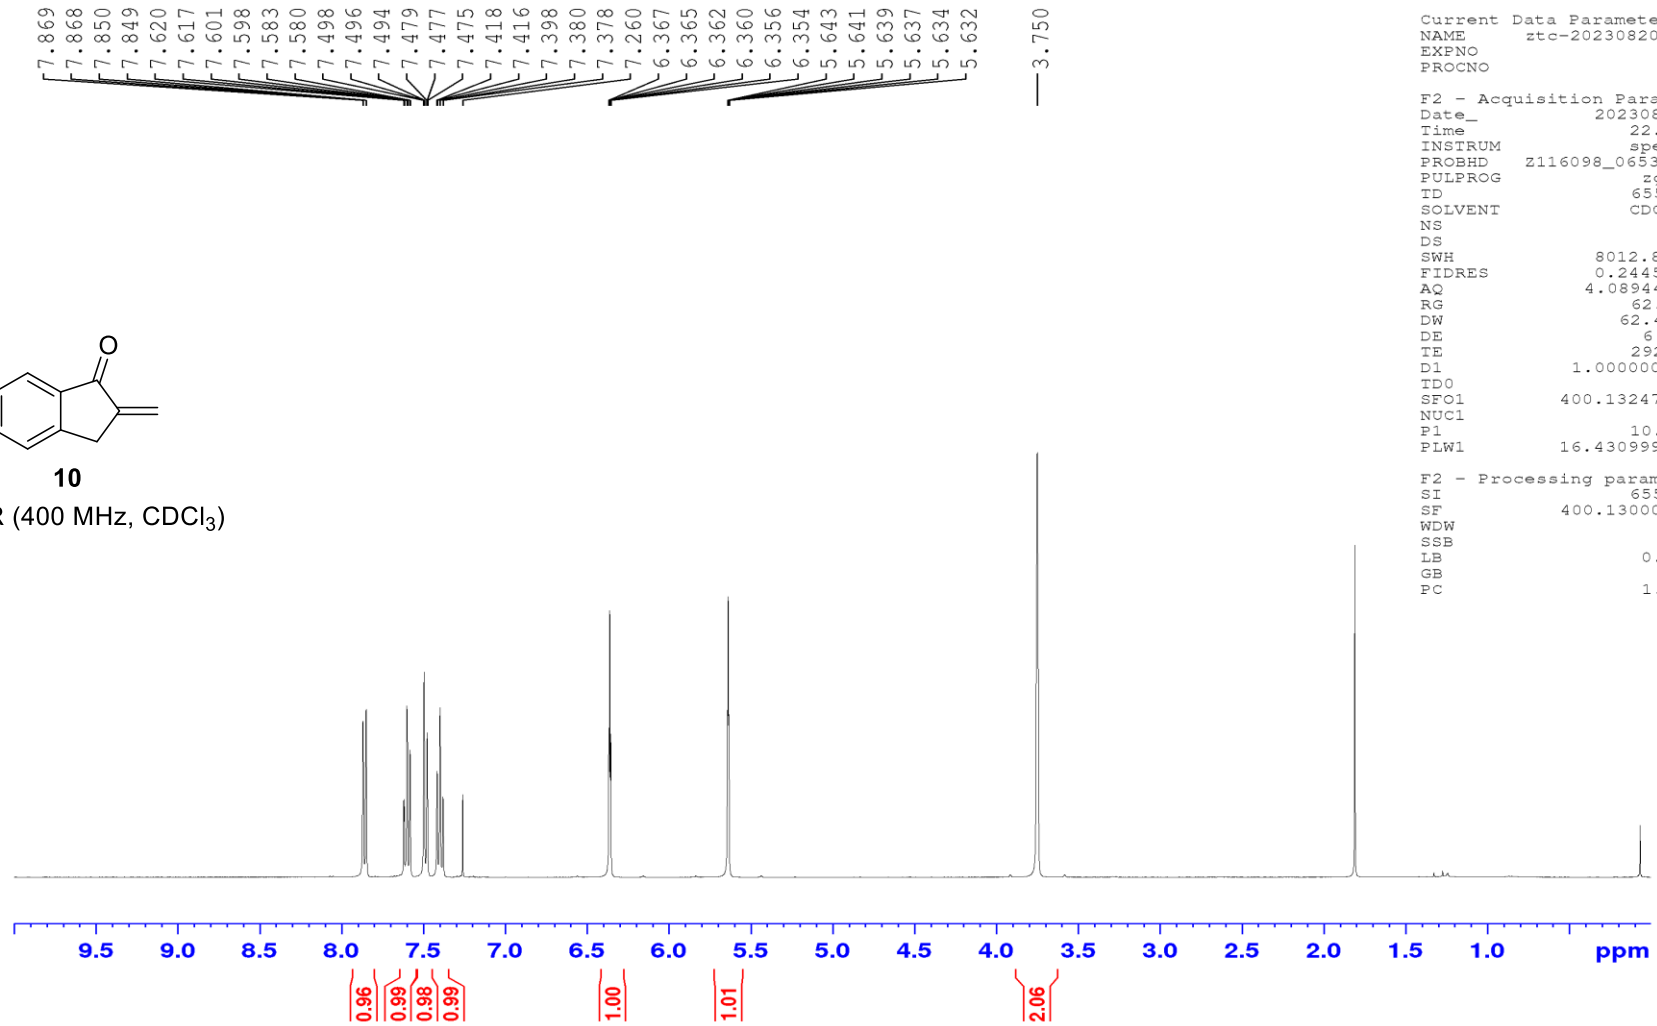

Current Data Parameters  
 NAME ztc-20230820-1  
 EXPNO 1  
 PROCNO 1

F2 - Acquisition Parameters  
 Date\_ 20230820  
 Time 22.43 h  
 INSTRUM spect  
 PROBHD z116098\_0653 (  
 PULPROG zg30  
 TD 65536  
 SOLVENT CDCl3  
 NS 16  
 DS 2  
 SWH 8012.820 Hz  
 FIDRES 0.244532 Hz  
 AQ 4.0894465 sec  
 RG 62.98  
 DW 62.400 usec  
 DE 6.50 usec  
 TE 292.1 K  
 D1 1.00000000 sec  
 TD0 1  
 SFO1 400.1324708 MHz  
 NUC1 1H  
 P1 10.00 usec  
 PLW1 16.43099976 W

F2 - Processing parameters  
 SI 65536  
 SF 400.1300097 MHz  
 WDW EM  
 SSB 0  
 LB 0.30 Hz  
 GB 0  
 FC 1.00

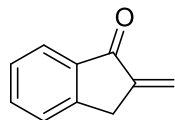

**10**

<sup>13</sup>C NMR (100 MHz, CDCl<sub>3</sub>)

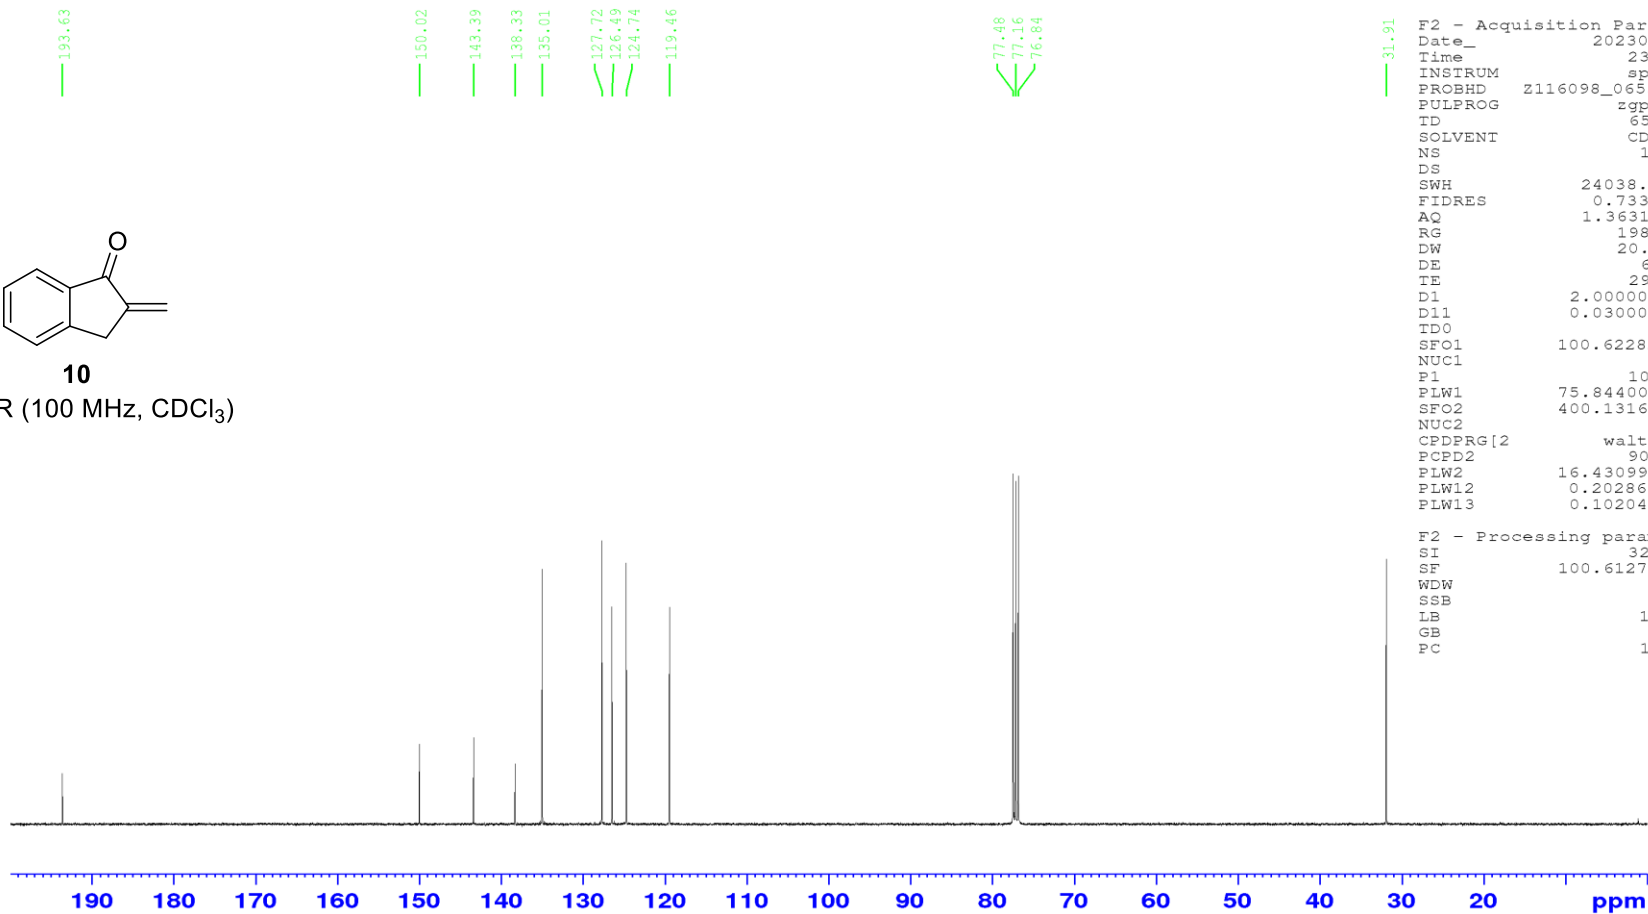

Current Data Parameters  
NAME ztc-20230820-1  
EXPNO 2  
PROCNO 1

F2 - Acquisition Parameters  
Date\_ 20230820  
Time 23.43 h  
INSTRUM spect  
PROBHD Z116098\_0653 (  
PULPROG zgpg30  
TD 65536  
SOLVENT CDCl3  
NS 1024  
DS 4  
SWH 24038.461 Hz  
FIDRES 0.733596 Hz  
AQ 1.3631488 sec  
RG 198.36  
DW 20.800 usec  
DE 6.50 usec  
TE 292.9 K  
D1 2.00000000 sec  
D11 0.03000000 sec  
TD0 1  
SFO1 100.6228298 MHz  
NUC1 13C  
P1 10.00 usec  
PLW1 75.84400177 W  
SFO2 400.1316005 MHz  
NUC2 1H  
CPDPRG[2] waltz16  
PCPD2 90.00 usec  
PLW2 16.43099976 W  
PLW12 0.20286000 W  
PLW13 0.10204000 W

F2 - Processing parameters  
SI 32768  
SF 100.6127601 MHz  
WDW EM  
SSB 0  
LB 1.00 Hz  
GB 0  
FC 1.40
